# Supplementary material
Source: PubMed Central journal article supplement (PMC7300650)
Supplement: TAN-96-277-s001.pdf [file TAN-96-277-s001.pdf]

# Binding affinities of 438 HLA Class I and II proteins to the complete proteomes of seven (potentially) pandemic viruses and distributions of strongest and weakest HLA peptide binders in human populations worldwide

## Supplementary material 5

### Extended results for the binding predictions for A/H3N2

#### Table of Contents

|                                                                                                            |    |
|------------------------------------------------------------------------------------------------------------|----|
| TOTAL NUMBER OF PEPTIDES WITH STRONG, REGULAR AND WEAK BINDING PREDICTIONS FOR <i>HLA-A</i> .....          | 2  |
| GENERAL BINDING PREDICTION TENDENCIES FOR <i>HLA-A</i> .....                                               | 4  |
| <i>HLA-A</i> ALLELES ORDERED BY NUMBER OF PRESENTED PEPTIDES WITH STRONG BINDING PREDICTION .....          | 5  |
| <i>HLA-A</i> ALLELES ORDERED BY NUMBER OF PRESENTED PEPTIDES WITH REGULAR BINDING PREDICTION.....          | 6  |
| <i>HLA-A</i> ALLELES ORDERED BY NUMBER OF PRESENTED PEPTIDES WITH WEAK BINDING PREDICTION.....             | 7  |
| TOTAL NUMBER OF PEPTIDES WITH STRONG, REGULAR AND WEAK BINDING PREDICTIONS FOR <i>HLA-B</i> .....          | 8  |
| GENERAL BINDING PREDICTION TENDENCIES FOR <i>HLA-B</i> .....                                               | 11 |
| <i>HLA-B</i> ALLELES ORDERED BY NUMBER OF PRESENTED PEPTIDES WITH STRONG BINDING PREDICTION .....          | 12 |
| <i>HLA-B</i> ALLELES ORDERED BY NUMBER OF PRESENTED PEPTIDES WITH REGULAR BINDING PREDICTION.....          | 13 |
| <i>HLA-B</i> ALLELES ORDERED BY NUMBER OF PRESENTED PEPTIDES WITH WEAK BINDING PREDICTION.....             | 14 |
| TOTAL NUMBER OF PEPTIDES WITH STRONG, REGULAR AND WEAK BINDING PREDICTIONS FOR <i>HLA-C</i> .....          | 15 |
| GENERAL BINDING PREDICTION TENDENCIES FOR <i>HLA-C</i> .....                                               | 16 |
| <i>HLA-C</i> ALLELES ORDERED BY NUMBER OF PRESENTED PEPTIDES WITH STRONG BINDING PREDICTION .....          | 17 |
| <i>HLA-C</i> ALLELES ORDERED BY NUMBER OF PRESENTED PEPTIDES WITH REGULAR BINDING PREDICTION.....          | 18 |
| <i>HLA-C</i> ALLELES ORDERED BY NUMBER OF PRESENTED PEPTIDES WITH WEAK BINDING PREDICTION .....            | 19 |
| TOTAL NUMBER OF PEPTIDES WITH STRONG, REGULAR AND WEAK BINDING PREDICTIONS FOR <i>HLA-DRB1</i> .....       | 20 |
| GENERAL BINDING PREDICTION TENDENCIES FOR <i>HLA-DRB1</i> .....                                            | 22 |
| <i>HLA-DRB1</i> ALLELES ORDERED BY NUMBER OF PRESENTED PEPTIDES WITH STRONG BINDING PREDICTION .....       | 23 |
| <i>HLA-DRB1</i> ALLELES ORDERED BY NUMBER OF PRESENTED PEPTIDES WITH REGULAR BINDING PREDICTION .....      | 24 |
| <i>HLA-DRB1</i> ALLELES ORDERED BY NUMBER OF PRESENTED PEPTIDES WITH WEAK BINDING PREDICTION .....         | 25 |
| TOTAL NUMBER OF PEPTIDES WITH STRONG, REGULAR AND WEAK BINDING PREDICTIONS FOR <i>HLA-DQA1/-DQB1</i> ....  | 26 |
| GENERAL BINDING PREDICTION TENDENCIES FOR <i>HLA-DQA1/-DQB1</i> .....                                      | 27 |
| <i>HLA-DQA1/-DQB1</i> ALLELES ORDERED BY NUMBER OF PRESENTED PEPTIDES WITH STRONG BINDING PREDICTION ..... | 28 |
| <i>HLA-DQA1/-DQB1</i> ALLELES ORDERED BY NUMBER OF PRESENTED PEPTIDES WITH REGULAR BINDING PREDICTION....  | 29 |
| <i>HLA-DQA1/-DQB1</i> ALLELES ORDERED BY NUMBER OF PRESENTED PEPTIDES WITH WEAK BINDING PREDICTION .....   | 30 |

## Total number of peptides with strong, regular and weak binding predictions for *HLA-A*

|             | <b>IC<sub>50</sub> ≤ 50 nM</b><br>Strong binders | <b>50 nM &lt; IC<sub>50</sub> ≤ 500 nM</b><br>Regular binders | <b>500 nM &lt; IC<sub>50</sub> ≤ 5000 nM</b><br>Weak binders | <b>IC<sub>50</sub> &gt; 5000 nM</b><br>Non binders |
|-------------|--------------------------------------------------|---------------------------------------------------------------|--------------------------------------------------------------|----------------------------------------------------|
| HLA-A*01:01 | 3                                                | 12                                                            | 58                                                           | 4399                                               |
| HLA-A*01:02 | 1                                                | 10                                                            | 94                                                           | 4367                                               |
| HLA-A*01:03 | 2                                                | 12                                                            | 46                                                           | 4412                                               |
| HLA-A*01:06 | 2                                                | 12                                                            | 73                                                           | 4385                                               |
| HLA-A*02:01 | 39                                               | 94                                                            | 240                                                          | 4099                                               |
| HLA-A*02:02 | 59                                               | 160                                                           | 406                                                          | 3847                                               |
| HLA-A*02:03 | 62                                               | 159                                                           | 369                                                          | 3882                                               |
| HLA-A*02:04 | 10                                               | 42                                                            | 169                                                          | 4251                                               |
| HLA-A*02:05 | 27                                               | 149                                                           | 513                                                          | 3783                                               |
| HLA-A*02:06 | 56                                               | 160                                                           | 460                                                          | 3796                                               |
| HLA-A*02:07 | 1                                                | 8                                                             | 57                                                           | 4406                                               |
| HLA-A*02:08 | 16                                               | 115                                                           | 516                                                          | 3825                                               |
| HLA-A*02:09 | 39                                               | 94                                                            | 240                                                          | 4099                                               |
| HLA-A*02:10 | 11                                               | 69                                                            | 282                                                          | 4110                                               |
| HLA-A*02:11 | 120                                              | 169                                                           | 369                                                          | 3814                                               |
| HLA-A*02:12 | 47                                               | 95                                                            | 241                                                          | 4089                                               |
| HLA-A*02:14 | 33                                               | 132                                                           | 422                                                          | 3885                                               |
| HLA-A*02:17 | 4                                                | 27                                                            | 143                                                          | 4298                                               |
| HLA-A*02:19 | 23                                               | 66                                                            | 178                                                          | 4205                                               |
| HLA-A*02:20 | 23                                               | 76                                                            | 261                                                          | 4112                                               |
| HLA-A*02:22 | 80                                               | 183                                                           | 410                                                          | 3799                                               |
| HLA-A*02:24 | 39                                               | 94                                                            | 240                                                          | 4099                                               |
| HLA-A*02:26 | 29                                               | 108                                                           | 256                                                          | 4079                                               |
| HLA-A*02:34 | 26                                               | 74                                                            | 243                                                          | 4129                                               |
| HLA-A*02:35 | 40                                               | 111                                                           | 331                                                          | 3990                                               |
| HLA-A*02:36 | 23                                               | 59                                                            | 191                                                          | 4199                                               |
| HLA-A*02:40 | 39                                               | 94                                                            | 240                                                          | 4099                                               |
| HLA-A*03:01 | 17                                               | 70                                                            | 167                                                          | 4218                                               |
| HLA-A*03:02 | 15                                               | 88                                                            | 196                                                          | 4173                                               |
| HLA-A*03:05 | 17                                               | 70                                                            | 167                                                          | 4218                                               |
| HLA-A*03:08 | 4                                                | 58                                                            | 162                                                          | 4248                                               |
| HLA-A*11:01 | 32                                               | 102                                                           | 194                                                          | 4144                                               |
| HLA-A*11:02 | 32                                               | 102                                                           | 194                                                          | 4144                                               |
| HLA-A*11:03 | 28                                               | 102                                                           | 238                                                          | 4104                                               |
| HLA-A*11:04 | 23                                               | 111                                                           | 202                                                          | 4136                                               |
| HLA-A*11:06 | 15                                               | 87                                                            | 215                                                          | 4155                                               |
| HLA-A*11:12 | 32                                               | 102                                                           | 194                                                          | 4144                                               |
| HLA-A*23:01 | 14                                               | 40                                                            | 175                                                          | 4243                                               |
| HLA-A*23:03 | 14                                               | 40                                                            | 175                                                          | 4243                                               |
| HLA-A*23:04 | 32                                               | 98                                                            | 258                                                          | 4084                                               |
| HLA-A*24:02 | 7                                                | 28                                                            | 126                                                          | 4311                                               |
| HLA-A*24:03 | 29                                               | 81                                                            | 212                                                          | 4150                                               |
| HLA-A*24:04 | 0                                                | 20                                                            | 130                                                          | 4322                                               |
| HLA-A*24:05 | 7                                                | 28                                                            | 126                                                          | 4311                                               |
| HLA-A*24:06 | 5                                                | 32                                                            | 152                                                          | 4283                                               |
| HLA-A*24:07 | 3                                                | 24                                                            | 126                                                          | 4319                                               |
| HLA-A*24:08 | 2                                                | 28                                                            | 150                                                          | 4292                                               |
| HLA-A*24:10 | 24                                               | 83                                                            | 243                                                          | 4122                                               |
| HLA-A*24:13 | 14                                               | 40                                                            | 175                                                          | 4243                                               |
| HLA-A*24:20 | 7                                                | 28                                                            | 126                                                          | 4311                                               |
| HLA-A*24:21 | 7                                                | 28                                                            | 126                                                          | 4311                                               |
| HLA-A*24:23 | 29                                               | 81                                                            | 212                                                          | 4150                                               |
| HLA-A*25:01 | 0                                                | 5                                                             | 72                                                           | 4395                                               |
| HLA-A*25:02 | 0                                                | 4                                                             | 77                                                           | 4391                                               |
| HLA-A*26:01 | 1                                                | 20                                                            | 113                                                          | 4338                                               |
| HLA-A*26:02 | 26                                               | 88                                                            | 283                                                          | 4075                                               |
| HLA-A*26:03 | 0                                                | 18                                                            | 188                                                          | 4266                                               |
| HLA-A*26:05 | 1                                                | 15                                                            | 120                                                          | 4336                                               |
| HLA-A*26:08 | 1                                                | 32                                                            | 175                                                          | 4264                                               |
| HLA-A*26:12 | 1                                                | 24                                                            | 143                                                          | 4304                                               |
| HLA-A*26:18 | 1                                                | 24                                                            | 143                                                          | 4304                                               |
| HLA-A*29:01 | 20                                               | 45                                                            | 167                                                          | 4240                                               |

|             | <b>IC<sub>50</sub> ≤ 50 nM</b><br><b>Strong binders</b> | <b>50 nM &lt; IC<sub>50</sub> ≤ 500 nM</b><br><b>Regular binders</b> | <b>500 nM &lt; IC<sub>50</sub> ≤ 5000 nM</b><br><b>Weak binders</b> | <b>IC<sub>50</sub> &gt; 5000 nM</b><br><b>Non binders</b> |
|-------------|---------------------------------------------------------|----------------------------------------------------------------------|---------------------------------------------------------------------|-----------------------------------------------------------|
| HLA-A*29:02 | 20                                                      | 45                                                                   | 167                                                                 | 4240                                                      |
| HLA-A*30:01 | 51                                                      | 209                                                                  | 722                                                                 | 3490                                                      |
| HLA-A*30:02 | 12                                                      | 52                                                                   | 217                                                                 | 4191                                                      |
| HLA-A*30:04 | 0                                                       | 28                                                                   | 365                                                                 | 4079                                                      |
| HLA-A*30:08 | 3                                                       | 49                                                                   | 315                                                                 | 4105                                                      |
| HLA-A*31:01 | 42                                                      | 137                                                                  | 265                                                                 | 4028                                                      |
| HLA-A*31:02 | 33                                                      | 138                                                                  | 304                                                                 | 3997                                                      |
| HLA-A*31:04 | 64                                                      | 158                                                                  | 330                                                                 | 3920                                                      |
| HLA-A*31:08 | 19                                                      | 103                                                                  | 379                                                                 | 3971                                                      |
| HLA-A*32:01 | 26                                                      | 72                                                                   | 290                                                                 | 4084                                                      |
| HLA-A*32:02 | 9                                                       | 66                                                                   | 237                                                                 | 4160                                                      |
| HLA-A*32:03 | 6                                                       | 60                                                                   | 218                                                                 | 4188                                                      |
| HLA-A*33:01 | 16                                                      | 72                                                                   | 173                                                                 | 4211                                                      |
| HLA-A*33:03 | 30                                                      | 85                                                                   | 216                                                                 | 4141                                                      |
| HLA-A*34:01 | 2                                                       | 52                                                                   | 389                                                                 | 4029                                                      |
| HLA-A*34:02 | 11                                                      | 85                                                                   | 277                                                                 | 4099                                                      |
| HLA-A*36:01 | 3                                                       | 20                                                                   | 132                                                                 | 4317                                                      |
| HLA-A*43:01 | 1                                                       | 21                                                                   | 148                                                                 | 4302                                                      |
| HLA-A*66:01 | 0                                                       | 27                                                                   | 226                                                                 | 4219                                                      |
| HLA-A*66:02 | 2                                                       | 44                                                                   | 351                                                                 | 4075                                                      |
| HLA-A*66:03 | 0                                                       | 34                                                                   | 278                                                                 | 4160                                                      |
| HLA-A*68:01 | 53                                                      | 120                                                                  | 299                                                                 | 4000                                                      |
| HLA-A*68:02 | 33                                                      | 114                                                                  | 350                                                                 | 3975                                                      |
| HLA-A*68:03 | 34                                                      | 91                                                                   | 245                                                                 | 4102                                                      |
| HLA-A*68:06 | 4                                                       | 28                                                                   | 325                                                                 | 4115                                                      |
| HLA-A*68:12 | 53                                                      | 120                                                                  | 299                                                                 | 4000                                                      |
| HLA-A*69:01 | 16                                                      | 84                                                                   | 312                                                                 | 4060                                                      |
| HLA-A*74:01 | 3                                                       | 29                                                                   | 143                                                                 | 4297                                                      |
| HLA-A*74:03 | 3                                                       | 29                                                                   | 143                                                                 | 4297                                                      |
| HLA-A*80:01 | 4                                                       | 16                                                                   | 61                                                                  | 4391                                                      |

Alleles are ordered alphabetically.





## HLA-A alleles ordered by number of presented peptides with regular binding prediction

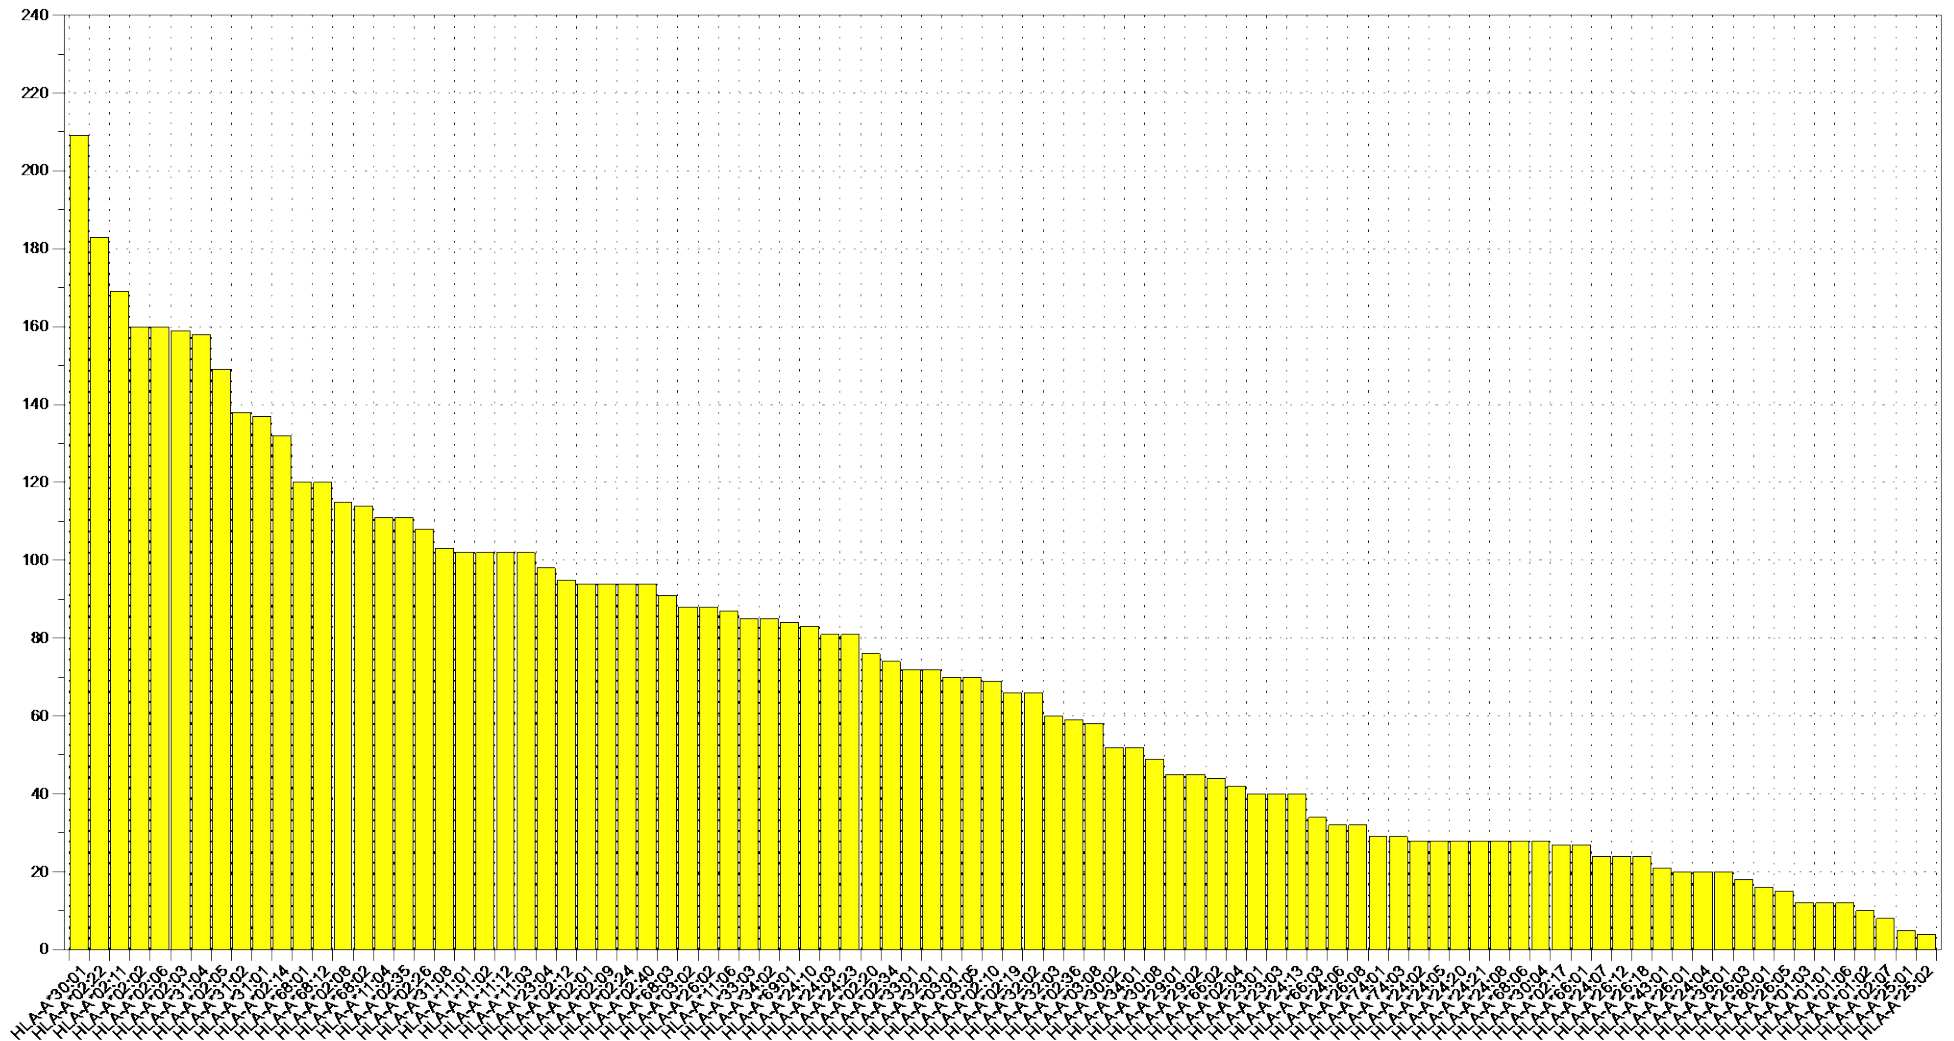

Alleles are ordered on the x-axis by their regular ( $50 \text{ nM} < IC_{50} \leq 500 \text{ nM}$ ) binding prediction and the number of peptides presented are displayed on the y-axis.

## HLA-A alleles ordered by number of presented peptides with weak binding prediction

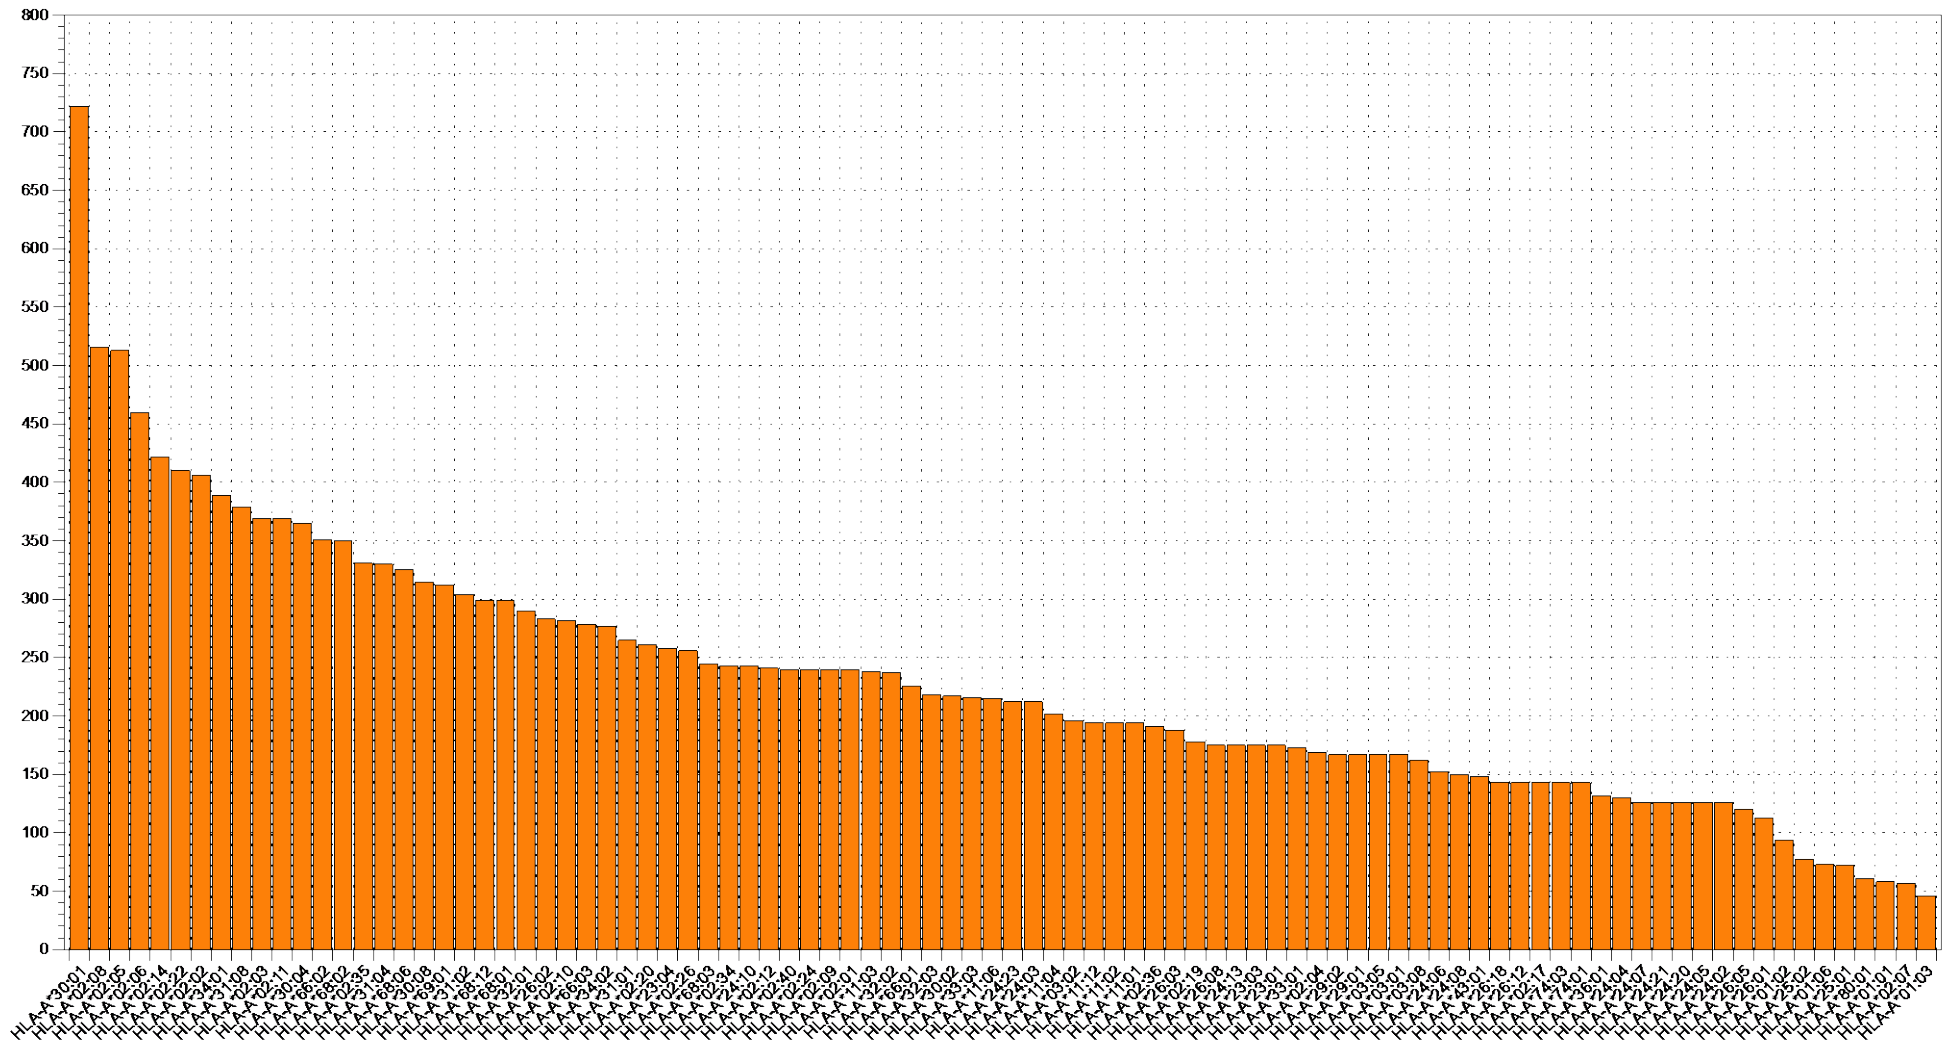

## Total number of peptides with strong, regular and weak binding predictions for *HLA-B*

|             | <b>IC<sub>50</sub> ≤ 50 nM</b><br>Strong binders | <b>50 nM &lt; IC<sub>50</sub> ≤ 500 nM</b><br>Regular binders | <b>500 nM &lt; IC<sub>50</sub> ≤ 5000 nM</b><br>Weak binders | <b>IC<sub>50</sub> &gt; 5000 nM</b><br>Non binders |
|-------------|--------------------------------------------------|---------------------------------------------------------------|--------------------------------------------------------------|----------------------------------------------------|
| HLA-B*07:02 | 11                                               | 38                                                            | 160                                                          | 4263                                               |
| HLA-B*07:04 | 4                                                | 51                                                            | 177                                                          | 4240                                               |
| HLA-B*07:05 | 15                                               | 43                                                            | 194                                                          | 4220                                               |
| HLA-B*07:06 | 15                                               | 43                                                            | 194                                                          | 4220                                               |
| HLA-B*08:01 | 12                                               | 52                                                            | 295                                                          | 4113                                               |
| HLA-B*08:03 | 0                                                | 2                                                             | 32                                                           | 4438                                               |
| HLA-B*08:04 | 2                                                | 30                                                            | 282                                                          | 4158                                               |
| HLA-B*08:05 | 2                                                | 35                                                            | 236                                                          | 4199                                               |
| HLA-B*13:01 | 1                                                | 45                                                            | 371                                                          | 4055                                               |
| HLA-B*13:02 | 0                                                | 7                                                             | 178                                                          | 4287                                               |
| HLA-B*13:03 | 0                                                | 7                                                             | 203                                                          | 4262                                               |
| HLA-B*13:04 | 0                                                | 15                                                            | 327                                                          | 4130                                               |
| HLA-B*14:01 | 0                                                | 8                                                             | 131                                                          | 4333                                               |
| HLA-B*14:02 | 0                                                | 8                                                             | 131                                                          | 4333                                               |
| HLA-B*14:03 | 0                                                | 6                                                             | 146                                                          | 4320                                               |
| HLA-B*15:01 | 28                                               | 105                                                           | 350                                                          | 3989                                               |
| HLA-B*15:02 | 11                                               | 83                                                            | 286                                                          | 4092                                               |
| HLA-B*15:03 | 111                                              | 248                                                           | 653                                                          | 3460                                               |
| HLA-B*15:04 | 0                                                | 22                                                            | 355                                                          | 4095                                               |
| HLA-B*15:05 | 24                                               | 107                                                           | 411                                                          | 3930                                               |
| HLA-B*15:06 | 30                                               | 115                                                           | 352                                                          | 3975                                               |
| HLA-B*15:07 | 11                                               | 101                                                           | 341                                                          | 4019                                               |
| HLA-B*15:08 | 3                                                | 23                                                            | 181                                                          | 4265                                               |
| HLA-B*15:09 | 1                                                | 4                                                             | 54                                                           | 4413                                               |
| HLA-B*15:10 | 0                                                | 5                                                             | 56                                                           | 4411                                               |
| HLA-B*15:11 | 3                                                | 22                                                            | 181                                                          | 4266                                               |
| HLA-B*15:12 | 5                                                | 41                                                            | 234                                                          | 4192                                               |
| HLA-B*15:13 | 0                                                | 21                                                            | 277                                                          | 4174                                               |
| HLA-B*15:15 | 7                                                | 62                                                            | 267                                                          | 4136                                               |
| HLA-B*15:16 | 23                                               | 123                                                           | 339                                                          | 3987                                               |
| HLA-B*15:17 | 88                                               | 154                                                           | 321                                                          | 3909                                               |
| HLA-B*15:18 | 1                                                | 29                                                            | 186                                                          | 4256                                               |
| HLA-B*15:20 | 24                                               | 104                                                           | 407                                                          | 3937                                               |
| HLA-B*15:21 | 2                                                | 12                                                            | 141                                                          | 4317                                               |
| HLA-B*15:24 | 0                                                | 36                                                            | 320                                                          | 4116                                               |
| HLA-B*15:25 | 49                                               | 130                                                           | 401                                                          | 3892                                               |
| HLA-B*15:27 | 16                                               | 88                                                            | 277                                                          | 4091                                               |
| HLA-B*15:29 | 27                                               | 142                                                           | 498                                                          | 3805                                               |
| HLA-B*15:31 | 8                                                | 76                                                            | 302                                                          | 4086                                               |
| HLA-B*15:32 | 19                                               | 127                                                           | 423                                                          | 3903                                               |
| HLA-B*15:34 | 28                                               | 105                                                           | 350                                                          | 3989                                               |
| HLA-B*15:35 | 9                                                | 91                                                            | 300                                                          | 4072                                               |
| HLA-B*15:38 | 19                                               | 104                                                           | 365                                                          | 3984                                               |
| HLA-B*15:39 | 54                                               | 129                                                           | 407                                                          | 3882                                               |
| HLA-B*15:40 | 7                                                | 79                                                            | 282                                                          | 4104                                               |
| HLA-B*15:58 | 0                                                | 10                                                            | 200                                                          | 4262                                               |
| HLA-B*18:01 | 7                                                | 28                                                            | 158                                                          | 4279                                               |
| HLA-B*18:02 | 3                                                | 37                                                            | 211                                                          | 4221                                               |
| HLA-B*18:03 | 2                                                | 28                                                            | 190                                                          | 4252                                               |
| HLA-B*18:05 | 7                                                | 28                                                            | 158                                                          | 4279                                               |
| HLA-B*18:07 | 2                                                | 12                                                            | 172                                                          | 4286                                               |
| HLA-B*27:02 | 0                                                | 17                                                            | 66                                                           | 4389                                               |
| HLA-B*27:03 | 0                                                | 8                                                             | 50                                                           | 4414                                               |
| HLA-B*27:04 | 3                                                | 17                                                            | 98                                                           | 4354                                               |
| HLA-B*27:05 | 15                                               | 57                                                            | 186                                                          | 4214                                               |
| HLA-B*27:06 | 22                                               | 47                                                            | 169                                                          | 4234                                               |
| HLA-B*27:07 | 28                                               | 60                                                            | 272                                                          | 4112                                               |
| HLA-B*27:08 | 16                                               | 38                                                            | 200                                                          | 4218                                               |
| HLA-B*27:09 | 21                                               | 46                                                            | 207                                                          | 4198                                               |
| HLA-B*27:12 | 14                                               | 63                                                            | 268                                                          | 4127                                               |
| HLA-B*27:14 | 0                                                | 23                                                            | 128                                                          | 4321                                               |
| HLA-B*35:01 | 21                                               | 63                                                            | 262                                                          | 4126                                               |



|             | IC <sub>50</sub> ≤ 50 nM<br>Strong binders | 50 nM < IC <sub>50</sub> ≤ 500 nM<br>Regular binders | 500 nM < IC <sub>50</sub> ≤ 5000 nM<br>Weak binders | IC <sub>50</sub> > 5000 nM<br>Non binders |
|-------------|--------------------------------------------|------------------------------------------------------|-----------------------------------------------------|-------------------------------------------|
| HLA-B*35:02 | 2                                          | 13                                                   | 75                                                  | 4382                                      |
| HLA-B*35:03 | 0                                          | 11                                                   | 47                                                  | 4414                                      |
| HLA-B*35:04 | 2                                          | 13                                                   | 75                                                  | 4382                                      |
| HLA-B*35:05 | 15                                         | 69                                                   | 334                                                 | 4054                                      |
| HLA-B*35:06 | 0                                          | 8                                                    | 38                                                  | 4426                                      |
| HLA-B*35:08 | 3                                          | 26                                                   | 132                                                 | 4311                                      |
| HLA-B*35:09 | 2                                          | 13                                                   | 75                                                  | 4382                                      |
| HLA-B*35:10 | 52                                         | 171                                                  | 494                                                 | 3755                                      |
| HLA-B*35:11 | 21                                         | 92                                                   | 359                                                 | 4000                                      |
| HLA-B*35:12 | 2                                          | 13                                                   | 75                                                  | 4382                                      |
| HLA-B*35:17 | 13                                         | 63                                                   | 290                                                 | 4106                                      |
| HLA-B*35:19 | 24                                         | 89                                                   | 364                                                 | 3995                                      |
| HLA-B*35:20 | 11                                         | 81                                                   | 330                                                 | 4050                                      |
| HLA-B*35:21 | 13                                         | 79                                                   | 340                                                 | 4040                                      |
| HLA-B*35:32 | 22                                         | 69                                                   | 294                                                 | 4087                                      |
| HLA-B*35:43 | 8                                          | 60                                                   | 303                                                 | 4101                                      |
| HLA-B*37:01 | 0                                          | 11                                                   | 128                                                 | 4333                                      |
| HLA-B*38:01 | 0                                          | 6                                                    | 98                                                  | 4368                                      |
| HLA-B*38:02 | 0                                          | 6                                                    | 113                                                 | 4353                                      |
| HLA-B*39:01 | 12                                         | 43                                                   | 222                                                 | 4195                                      |
| HLA-B*39:02 | 22                                         | 110                                                  | 512                                                 | 3828                                      |
| HLA-B*39:03 | 9                                          | 52                                                   | 231                                                 | 4180                                      |
| HLA-B*39:04 | 12                                         | 43                                                   | 222                                                 | 4195                                      |
| HLA-B*39:05 | 2                                          | 16                                                   | 89                                                  | 4365                                      |
| HLA-B*39:06 | 1                                          | 19                                                   | 132                                                 | 4320                                      |
| HLA-B*39:07 | 3                                          | 56                                                   | 274                                                 | 4139                                      |
| HLA-B*39:09 | 9                                          | 41                                                   | 269                                                 | 4153                                      |
| HLA-B*39:10 | 9                                          | 52                                                   | 292                                                 | 4119                                      |
| HLA-B*39:15 | 7                                          | 41                                                   | 186                                                 | 4238                                      |
| HLA-B*39:24 | 9                                          | 52                                                   | 231                                                 | 4180                                      |
| HLA-B*40:01 | 11                                         | 30                                                   | 97                                                  | 4334                                      |
| HLA-B*40:02 | 12                                         | 52                                                   | 205                                                 | 4203                                      |
| HLA-B*40:03 | 6                                          | 39                                                   | 244                                                 | 4183                                      |
| HLA-B*40:04 | 16                                         | 47                                                   | 172                                                 | 4237                                      |
| HLA-B*40:05 | 5                                          | 51                                                   | 246                                                 | 4170                                      |
| HLA-B*40:06 | 1                                          | 21                                                   | 120                                                 | 4330                                      |
| HLA-B*40:09 | 9                                          | 45                                                   | 188                                                 | 4230                                      |
| HLA-B*40:10 | 0                                          | 15                                                   | 96                                                  | 4361                                      |
| HLA-B*40:11 | 16                                         | 47                                                   | 173                                                 | 4236                                      |
| HLA-B*40:12 | 0                                          | 12                                                   | 82                                                  | 4378                                      |
| HLA-B*40:14 | 16                                         | 47                                                   | 173                                                 | 4236                                      |
| HLA-B*40:16 | 5                                          | 33                                                   | 208                                                 | 4226                                      |
| HLA-B*40:40 | 4                                          | 47                                                   | 234                                                 | 4187                                      |
| HLA-B*41:01 | 7                                          | 41                                                   | 158                                                 | 4266                                      |
| HLA-B*41:02 | 11                                         | 63                                                   | 231                                                 | 4167                                      |
| HLA-B*42:01 | 20                                         | 66                                                   | 295                                                 | 4091                                      |
| HLA-B*42:02 | 0                                          | 43                                                   | 197                                                 | 4232                                      |
| HLA-B*44:02 | 8                                          | 22                                                   | 90                                                  | 4352                                      |
| HLA-B*44:03 | 10                                         | 18                                                   | 99                                                  | 4345                                      |
| HLA-B*44:04 | 3                                          | 14                                                   | 75                                                  | 4380                                      |
| HLA-B*44:05 | 0                                          | 14                                                   | 69                                                  | 4389                                      |
| HLA-B*44:06 | 0                                          | 2                                                    | 34                                                  | 4436                                      |
| HLA-B*44:07 | 10                                         | 18                                                   | 99                                                  | 4345                                      |
| HLA-B*44:09 | 6                                          | 42                                                   | 203                                                 | 4221                                      |
| HLA-B*44:15 | 0                                          | 12                                                   | 66                                                  | 4394                                      |
| HLA-B*45:01 | 2                                          | 34                                                   | 119                                                 | 4317                                      |
| HLA-B*46:01 | 0                                          | 2                                                    | 45                                                  | 4425                                      |
| HLA-B*47:01 | 0                                          | 23                                                   | 292                                                 | 4157                                      |
| HLA-B*47:03 | 1                                          | 38                                                   | 253                                                 | 4180                                      |
| HLA-B*48:01 | 0                                          | 6                                                    | 75                                                  | 4391                                      |
| HLA-B*48:02 | 51                                         | 162                                                  | 561                                                 | 3698                                      |
| HLA-B*48:03 | 0                                          | 12                                                   | 82                                                  | 4378                                      |
| HLA-B*48:04 | 0                                          | 6                                                    | 75                                                  | 4391                                      |
| HLA-B*49:01 | 1                                          | 21                                                   | 83                                                  | 4367                                      |
| HLA-B*50:01 | 4                                          | 27                                                   | 161                                                 | 4280                                      |

|             | <b>IC<sub>50</sub> ≤ 50 nM</b><br><b>Strong binders</b> | <b>50 nM &lt; IC<sub>50</sub> ≤ 500 nM</b><br><b>Regular binders</b> | <b>500 nM &lt; IC<sub>50</sub> ≤ 5000 nM</b><br><b>Weak binders</b> | <b>IC<sub>50</sub> &gt; 5000 nM</b><br><b>Non binders</b> |
|-------------|---------------------------------------------------------|----------------------------------------------------------------------|---------------------------------------------------------------------|-----------------------------------------------------------|
| HLA-B*50:02 | 1                                                       | 16                                                                   | 94                                                                  | 4361                                                      |
| HLA-B*51:01 | 0                                                       | 7                                                                    | 51                                                                  | 4414                                                      |
| HLA-B*51:02 | 1                                                       | 7                                                                    | 68                                                                  | 4396                                                      |
| HLA-B*51:04 | 0                                                       | 5                                                                    | 78                                                                  | 4389                                                      |
| HLA-B*51:05 | 0                                                       | 3                                                                    | 28                                                                  | 4441                                                      |
| HLA-B*51:06 | 0                                                       | 9                                                                    | 90                                                                  | 4373                                                      |
| HLA-B*51:07 | 0                                                       | 0                                                                    | 24                                                                  | 4448                                                      |
| HLA-B*51:08 | 0                                                       | 4                                                                    | 42                                                                  | 4426                                                      |
| HLA-B*51:09 | 0                                                       | 4                                                                    | 49                                                                  | 4419                                                      |
| HLA-B*52:01 | 0                                                       | 2                                                                    | 72                                                                  | 4398                                                      |
| HLA-B*53:01 | 6                                                       | 28                                                                   | 148                                                                 | 4290                                                      |
| HLA-B*53:02 | 3                                                       | 23                                                                   | 146                                                                 | 4300                                                      |
| HLA-B*53:03 | 6                                                       | 60                                                                   | 355                                                                 | 4051                                                      |
| HLA-B*53:05 | 6                                                       | 36                                                                   | 138                                                                 | 4292                                                      |
| HLA-B*54:01 | 4                                                       | 17                                                                   | 99                                                                  | 4352                                                      |
| HLA-B*55:01 | 1                                                       | 13                                                                   | 105                                                                 | 4353                                                      |
| HLA-B*55:02 | 2                                                       | 24                                                                   | 141                                                                 | 4305                                                      |
| HLA-B*55:04 | 20                                                      | 62                                                                   | 352                                                                 | 4038                                                      |
| HLA-B*55:07 | 4                                                       | 17                                                                   | 99                                                                  | 4352                                                      |
| HLA-B*55:12 | 2                                                       | 18                                                                   | 142                                                                 | 4310                                                      |
| HLA-B*56:01 | 2                                                       | 17                                                                   | 124                                                                 | 4329                                                      |
| HLA-B*56:02 | 7                                                       | 35                                                                   | 239                                                                 | 4191                                                      |
| HLA-B*56:03 | 5                                                       | 50                                                                   | 385                                                                 | 4032                                                      |
| HLA-B*56:04 | 7                                                       | 35                                                                   | 239                                                                 | 4191                                                      |
| HLA-B*57:01 | 9                                                       | 43                                                                   | 215                                                                 | 4205                                                      |
| HLA-B*57:02 | 5                                                       | 31                                                                   | 162                                                                 | 4274                                                      |
| HLA-B*57:03 | 12                                                      | 60                                                                   | 228                                                                 | 4172                                                      |
| HLA-B*58:01 | 17                                                      | 82                                                                   | 282                                                                 | 4091                                                      |
| HLA-B*58:02 | 0                                                       | 4                                                                    | 29                                                                  | 4439                                                      |
| HLA-B*59:01 | 0                                                       | 7                                                                    | 100                                                                 | 4365                                                      |
| HLA-B*67:01 | 9                                                       | 38                                                                   | 207                                                                 | 4218                                                      |
| HLA-B*73:01 | 0                                                       | 5                                                                    | 69                                                                  | 4398                                                      |
| HLA-B*78:01 | 0                                                       | 7                                                                    | 110                                                                 | 4355                                                      |
| HLA-B*78:02 | 0                                                       | 7                                                                    | 51                                                                  | 4414                                                      |
| HLA-B*81:01 | 0                                                       | 16                                                                   | 71                                                                  | 4385                                                      |
| HLA-B*82:01 | 0                                                       | 1                                                                    | 60                                                                  | 4411                                                      |
| HLA-B*82:02 | 0                                                       | 1                                                                    | 60                                                                  | 4411                                                      |

Alleles are ordered alphabetically.

## General binding prediction tendencies for *HLA-B*

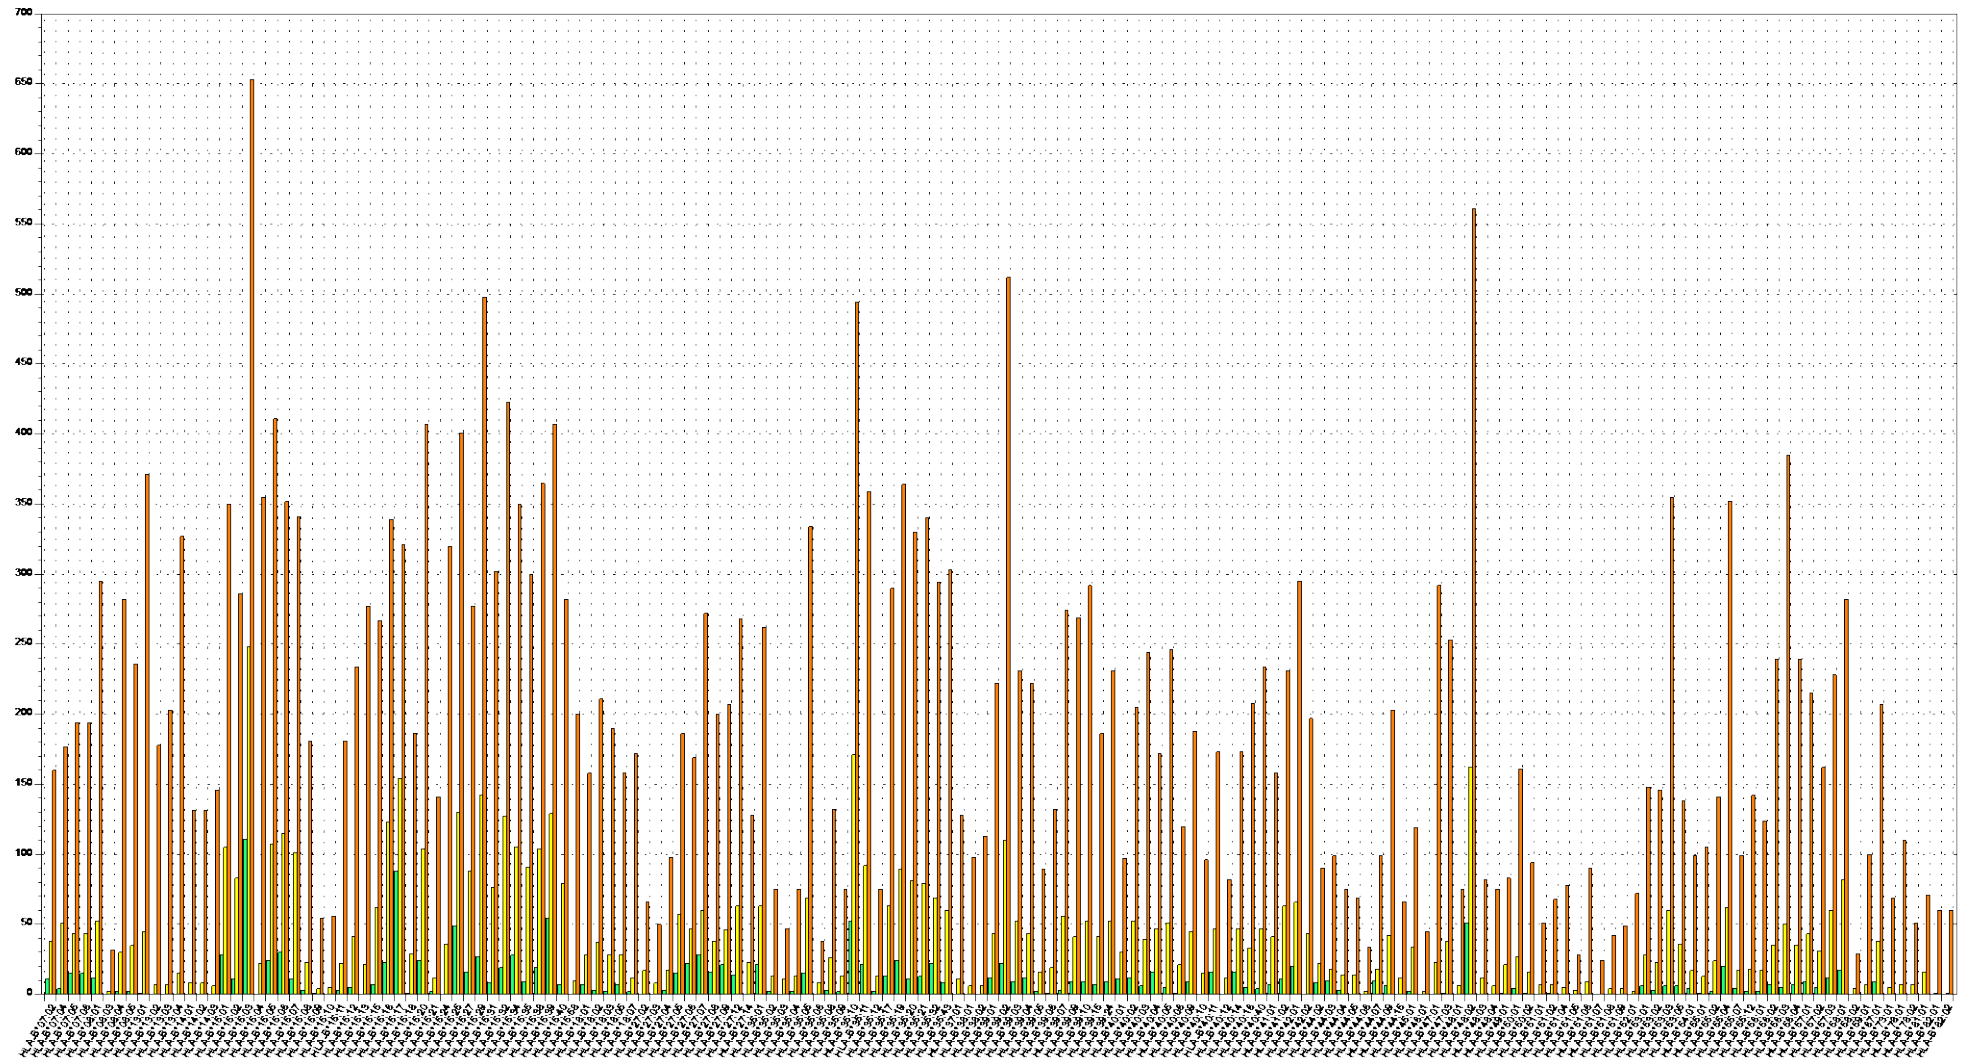

Alleles are ordered alphabetically on the x-axis, while the number of peptides binding with strong ( $IC_{50} \leq 50$  nM), regular ( $50$  nM  $< IC_{50} \leq 500$  nM) and weak ( $500$  nM  $< IC_{50} \leq 5000$  nM) binding prediction are displayed on the y-axis.

## HLA-B alleles ordered by number of presented peptides with strong binding prediction

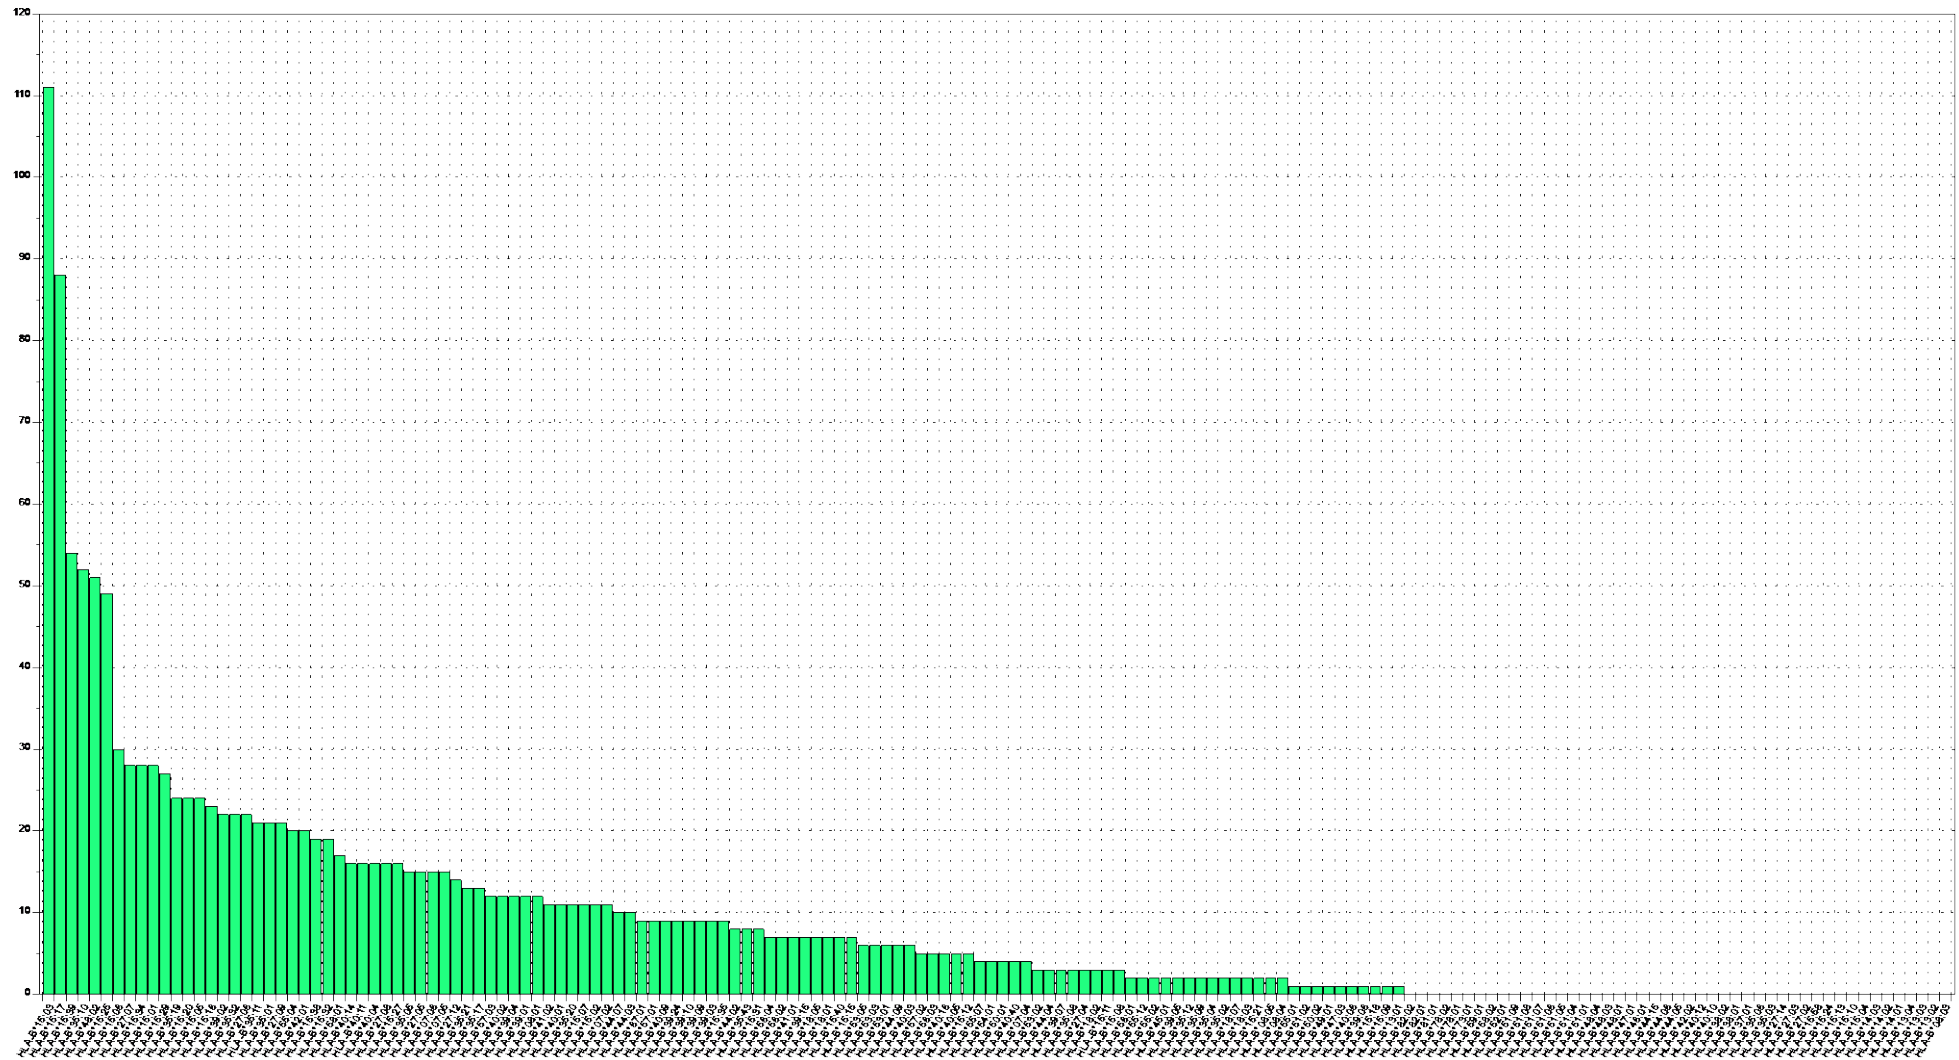

## HLA-B alleles ordered by number of presented peptides with regular binding prediction

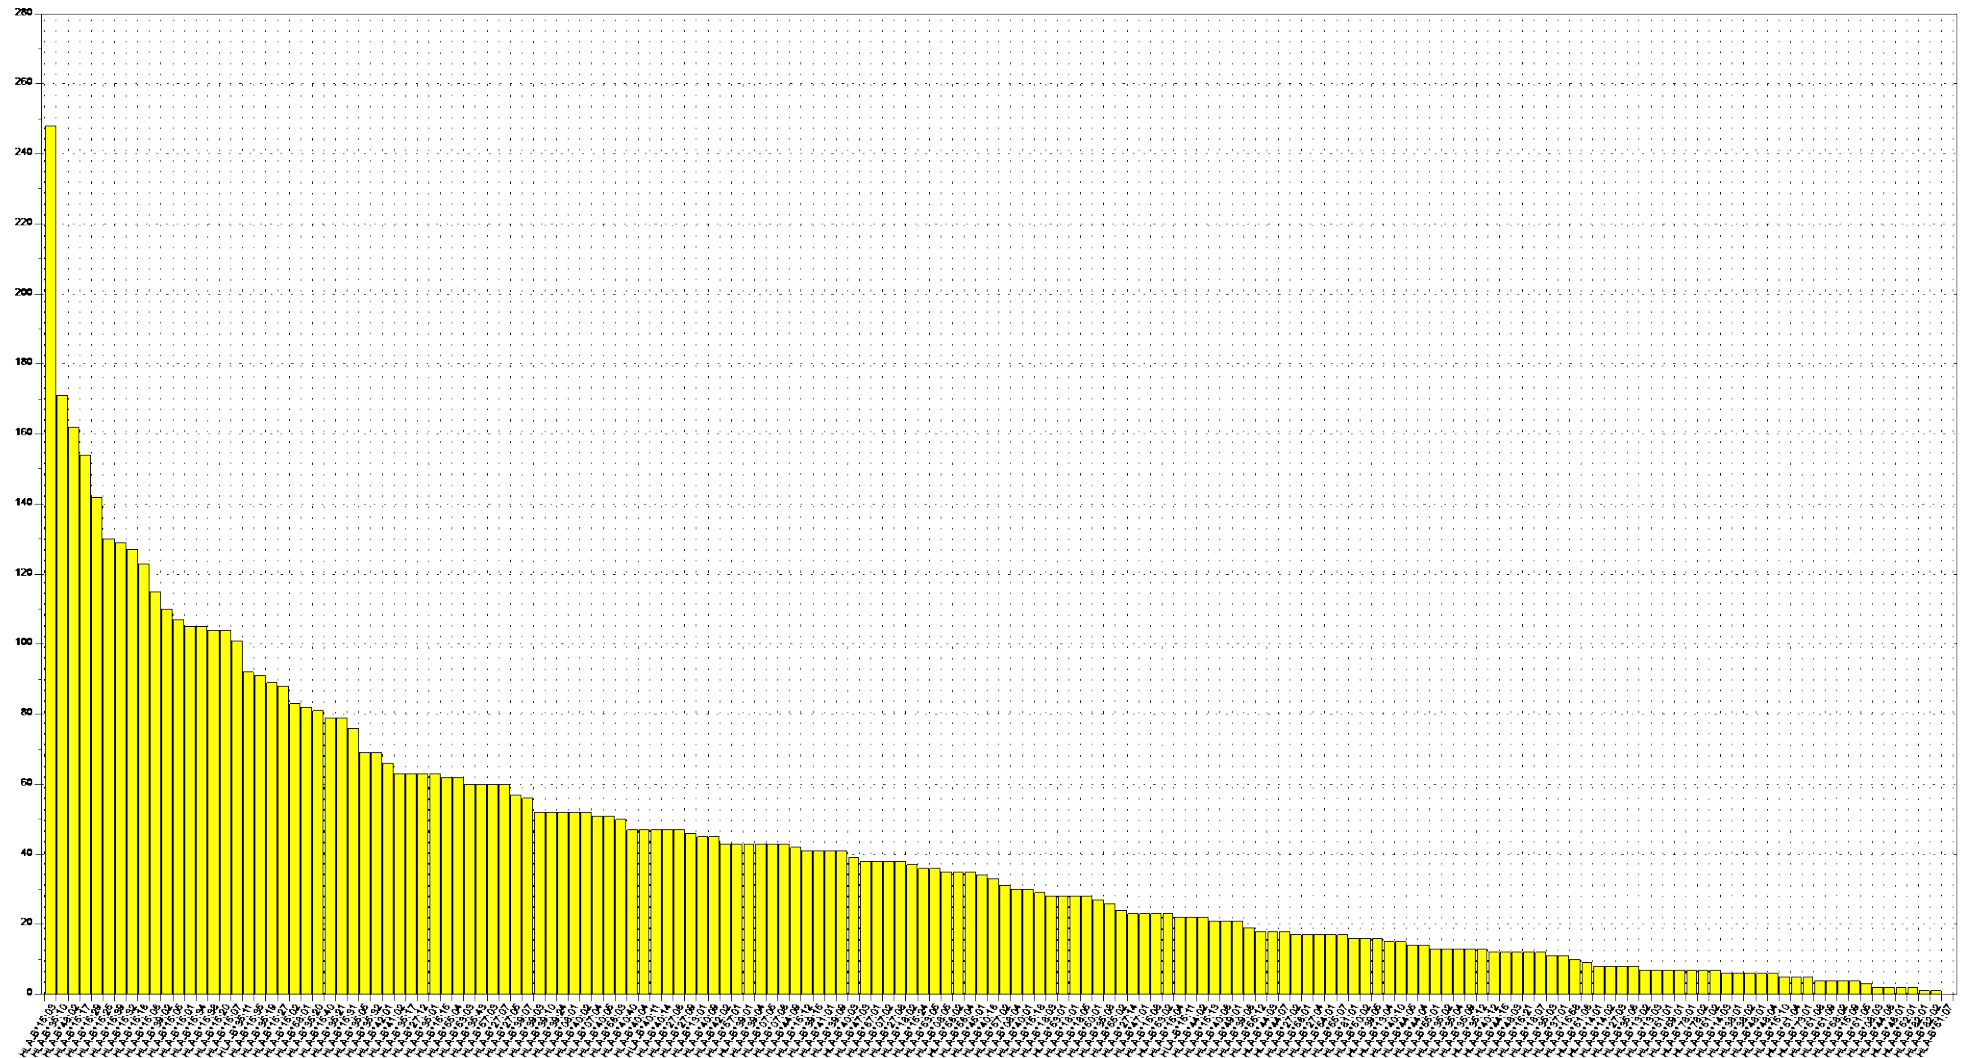

Alleles are ordered on the x-axis by their regular ( $50 \text{ nM} < IC_{50} \leq 500 \text{ nM}$ ) binding prediction and the number of peptides presented are displayed on the y-axis.

## HLA-B alleles ordered by number of presented peptides with weak binding prediction

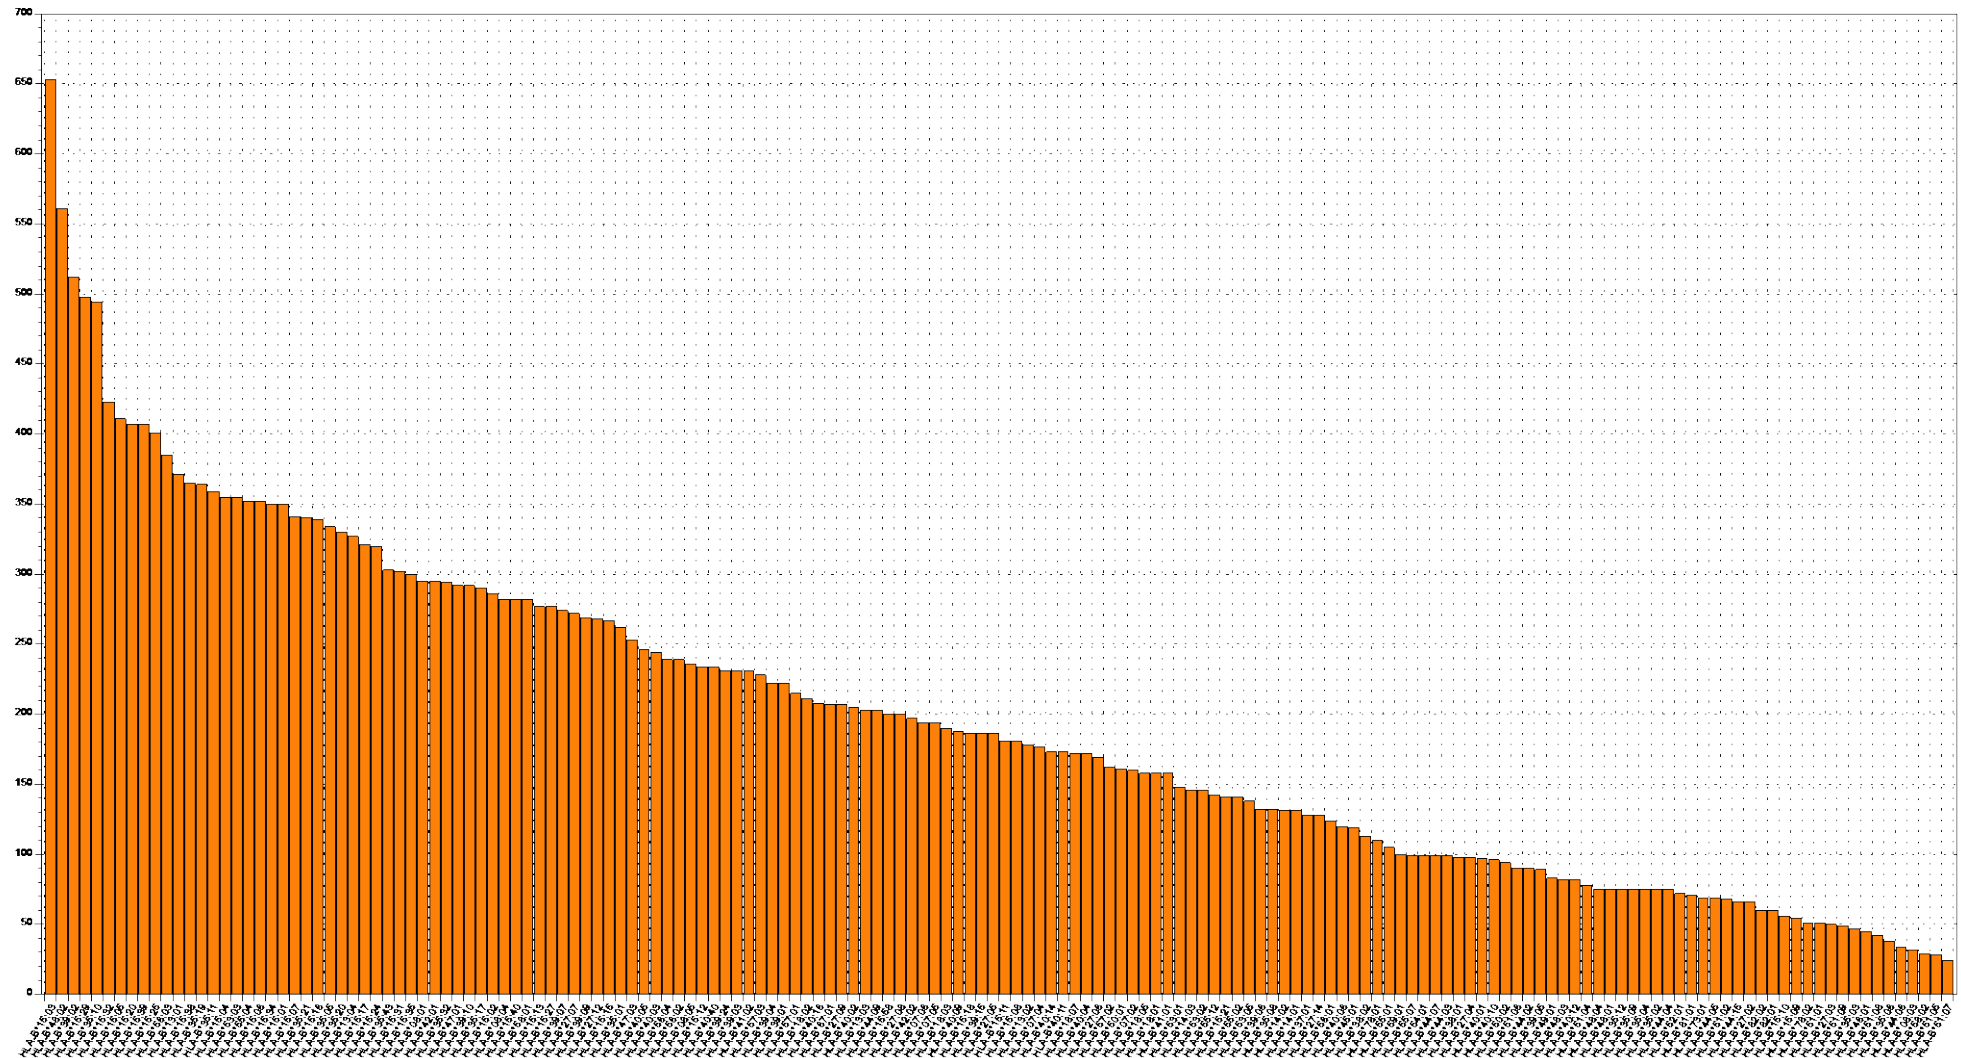

Alleles are ordered on the x-axis by their weak ( $500 \text{ nM} < IC_{50} \leq 5000 \text{ nM}$ ) binding prediction and the number of peptides presented are displayed on the y-axis.

## Total number of peptides with strong, regular and weak binding predictions for *HLA-C*

|             | $IC_{50} \leq 50$ nM<br>Strong binders | $50$ nM < $IC_{50} \leq 500$ nM<br>Regular binders | $500$ nM < $IC_{50} \leq 5000$ nM<br>Weak binders | $IC_{50} > 5000$ nM<br>Non binders |
|-------------|----------------------------------------|----------------------------------------------------|---------------------------------------------------|------------------------------------|
| HLA-C*01:02 | 0                                      | 1                                                  | 105                                               | 4366                               |
| HLA-C*01:03 | 0                                      | 0                                                  | 12                                                | 4460                               |
| HLA-C*02:02 | 1                                      | 67                                                 | 437                                               | 3967                               |
| HLA-C*02:10 | 1                                      | 67                                                 | 437                                               | 3967                               |
| HLA-C*03:02 | 45                                     | 177                                                | 503                                               | 3747                               |
| HLA-C*03:03 | 32                                     | 115                                                | 350                                               | 3975                               |
| HLA-C*03:04 | 32                                     | 115                                                | 350                                               | 3975                               |
| HLA-C*03:05 | 11                                     | 102                                                | 350                                               | 4009                               |
| HLA-C*03:07 | 14                                     | 133                                                | 360                                               | 3965                               |
| HLA-C*04:01 | 0                                      | 1                                                  | 32                                                | 4439                               |
| HLA-C*04:03 | 0                                      | 8                                                  | 59                                                | 4405                               |
| HLA-C*04:04 | 0                                      | 0                                                  | 49                                                | 4423                               |
| HLA-C*04:05 | 0                                      | 1                                                  | 32                                                | 4439                               |
| HLA-C*04:06 | 0                                      | 6                                                  | 140                                               | 4326                               |
| HLA-C*04:07 | 0                                      | 1                                                  | 32                                                | 4439                               |
| HLA-C*05:01 | 5                                      | 22                                                 | 138                                               | 4307                               |
| HLA-C*06:02 | 6                                      | 35                                                 | 188                                               | 4243                               |
| HLA-C*06:04 | 7                                      | 60                                                 | 368                                               | 4037                               |
| HLA-C*06:06 | 2                                      | 59                                                 | 434                                               | 3977                               |
| HLA-C*07:01 | 6                                      | 38                                                 | 205                                               | 4223                               |
| HLA-C*07:02 | 6                                      | 56                                                 | 334                                               | 4076                               |
| HLA-C*07:03 | 2                                      | 50                                                 | 417                                               | 4003                               |
| HLA-C*07:04 | 0                                      | 0                                                  | 63                                                | 4409                               |
| HLA-C*07:05 | 9                                      | 58                                                 | 322                                               | 4083                               |
| HLA-C*07:06 | 6                                      | 38                                                 | 205                                               | 4223                               |
| HLA-C*07:07 | 0                                      | 13                                                 | 139                                               | 4320                               |
| HLA-C*07:08 | 1                                      | 16                                                 | 129                                               | 4326                               |
| HLA-C*07:10 | 6                                      | 51                                                 | 344                                               | 4071                               |
| HLA-C*07:11 | 0                                      | 0                                                  | 63                                                | 4409                               |
| HLA-C*07:18 | 6                                      | 38                                                 | 205                                               | 4223                               |
| HLA-C*08:01 | 1                                      | 23                                                 | 222                                               | 4226                               |
| HLA-C*08:02 | 1                                      | 6                                                  | 86                                                | 4379                               |
| HLA-C*08:03 | 1                                      | 23                                                 | 222                                               | 4226                               |
| HLA-C*08:04 | 2                                      | 22                                                 | 237                                               | 4211                               |
| HLA-C*12:02 | 7                                      | 122                                                | 480                                               | 3863                               |
| HLA-C*12:03 | 44                                     | 214                                                | 614                                               | 3600                               |
| HLA-C*12:04 | 11                                     | 156                                                | 544                                               | 3761                               |
| HLA-C*12:05 | 8                                      | 146                                                | 535                                               | 3783                               |
| HLA-C*14:02 | 19                                     | 186                                                | 641                                               | 3626                               |
| HLA-C*14:03 | 19                                     | 186                                                | 641                                               | 3626                               |
| HLA-C*15:02 | 4                                      | 89                                                 | 364                                               | 4015                               |
| HLA-C*15:03 | 5                                      | 88                                                 | 379                                               | 4000                               |
| HLA-C*15:04 | 11                                     | 167                                                | 516                                               | 3778                               |
| HLA-C*15:05 | 1                                      | 67                                                 | 276                                               | 4128                               |
| HLA-C*15:06 | 10                                     | 132                                                | 395                                               | 3935                               |
| HLA-C*15:07 | 5                                      | 94                                                 | 375                                               | 3998                               |
| HLA-C*15:08 | 4                                      | 54                                                 | 250                                               | 4164                               |
| HLA-C*15:13 | 4                                      | 89                                                 | 364                                               | 4015                               |
| HLA-C*16:01 | 30                                     | 202                                                | 531                                               | 3709                               |
| HLA-C*16:02 | 2                                      | 113                                                | 457                                               | 3900                               |
| HLA-C*16:04 | 18                                     | 175                                                | 526                                               | 3753                               |
| HLA-C*17:01 | 2                                      | 46                                                 | 452                                               | 3972                               |
| HLA-C*17:03 | 1                                      | 23                                                 | 226                                               | 4222                               |
| HLA-C*18:01 | 0                                      | 0                                                  | 8                                                 | 4464                               |
| HLA-C*18:02 | 0                                      | 0                                                  | 8                                                 | 4464                               |

Alleles are ordered alphabetically.

## General binding prediction tendencies for HLA-C

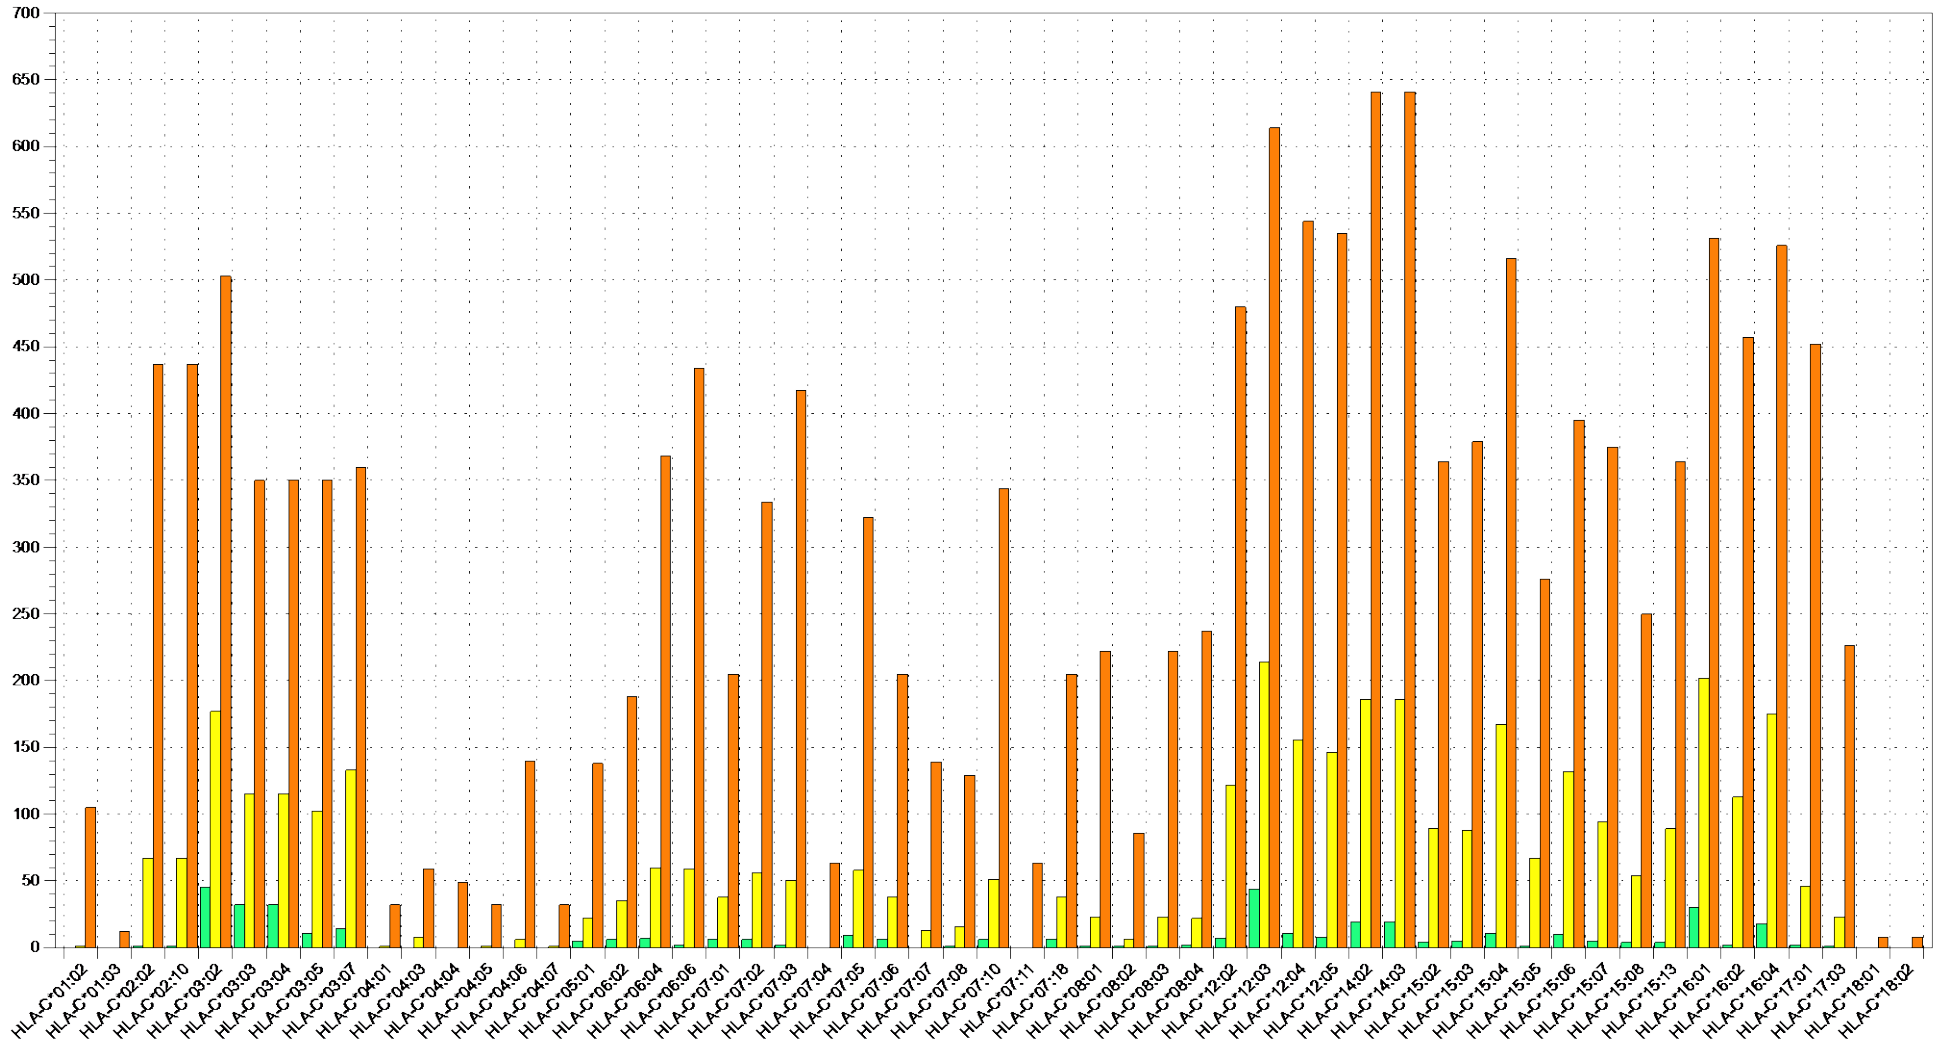

Alleles are ordered alphabetically on the x-axis, while the number of peptides binding with strong ( $IC_{50} \leq 50$  nM), regular ( $50 \text{ nM} < IC_{50} \leq 500$  nM) and weak ( $500 \text{ nM} < IC_{50} \leq 5000$  nM) binding prediction are displayed on the y-axis.



## HLA-C alleles ordered by number of presented peptides with strong binding prediction

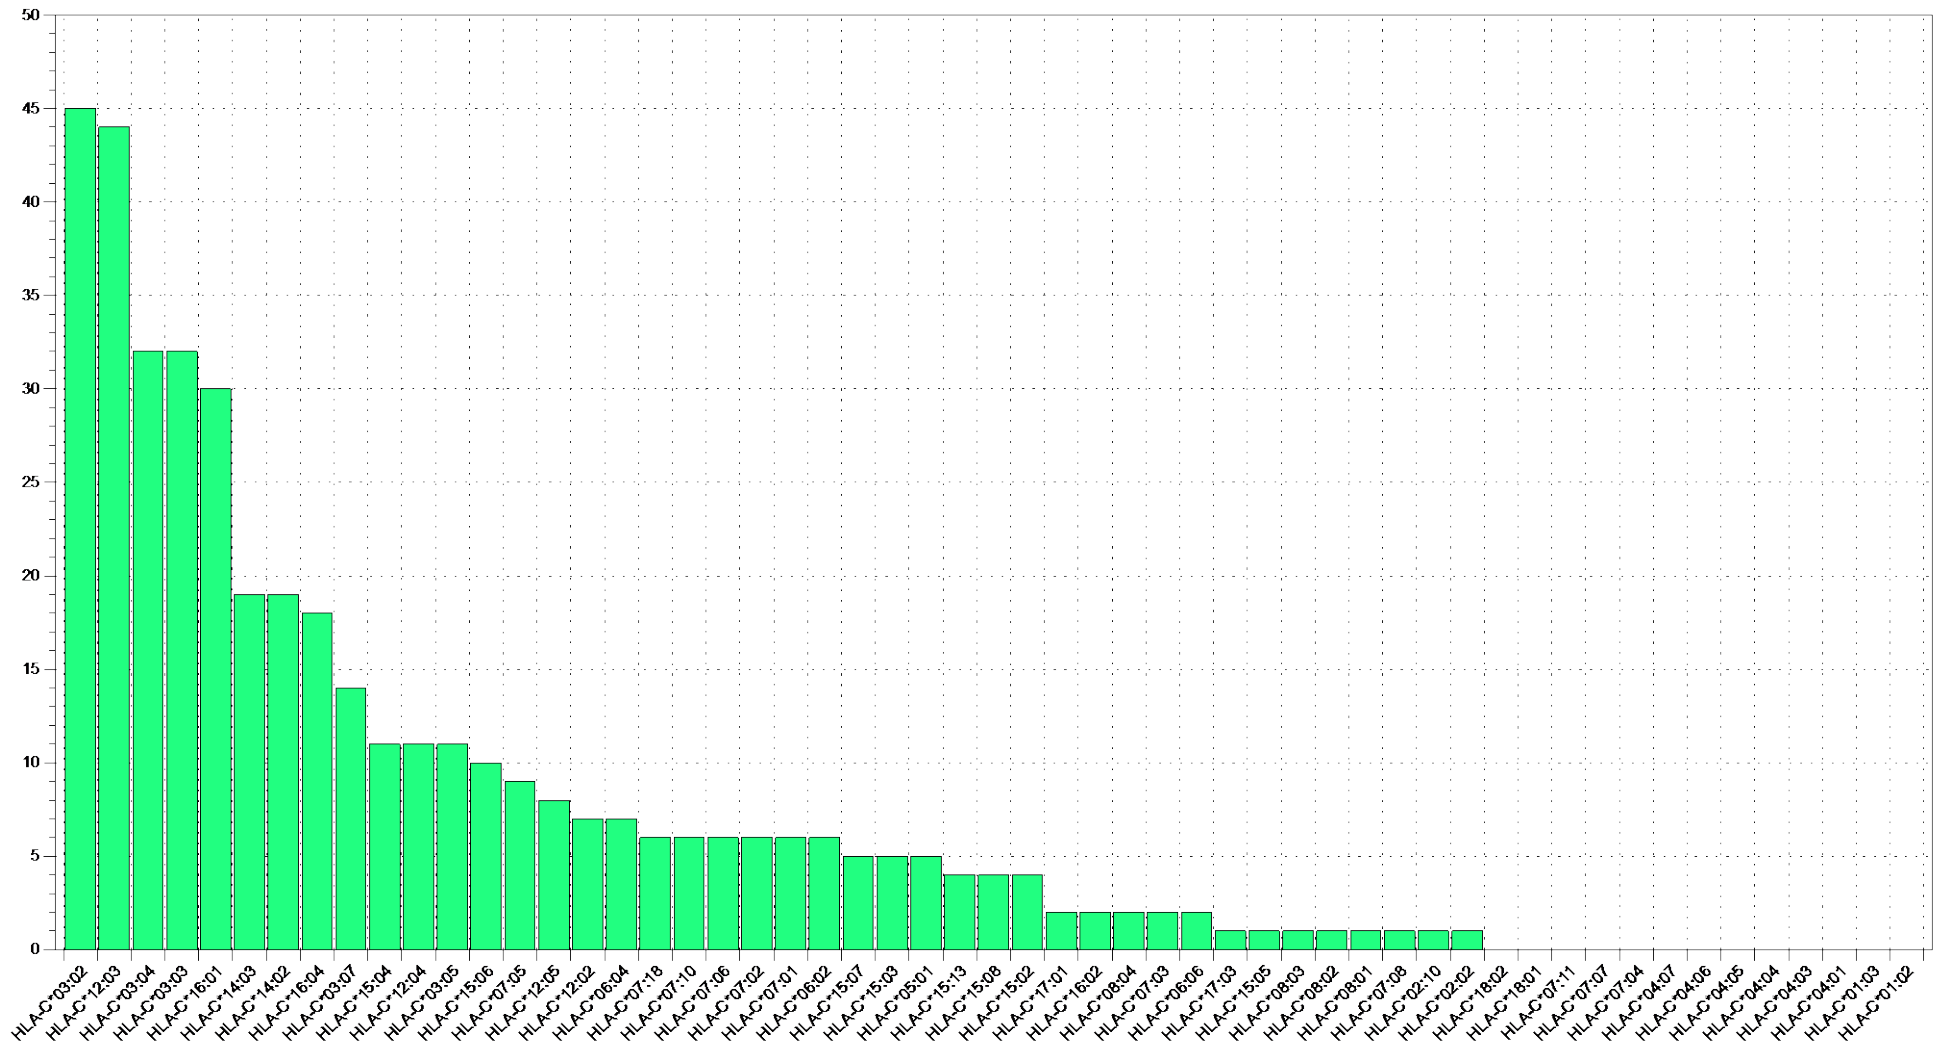

Alleles are ordered on the x-axis by their strong ( $IC_{50} \leq 50$  nM) binding prediction and the number of peptides presented are displayed on the y-axis.

## HLA-C alleles ordered by number of presented peptides with regular binding prediction

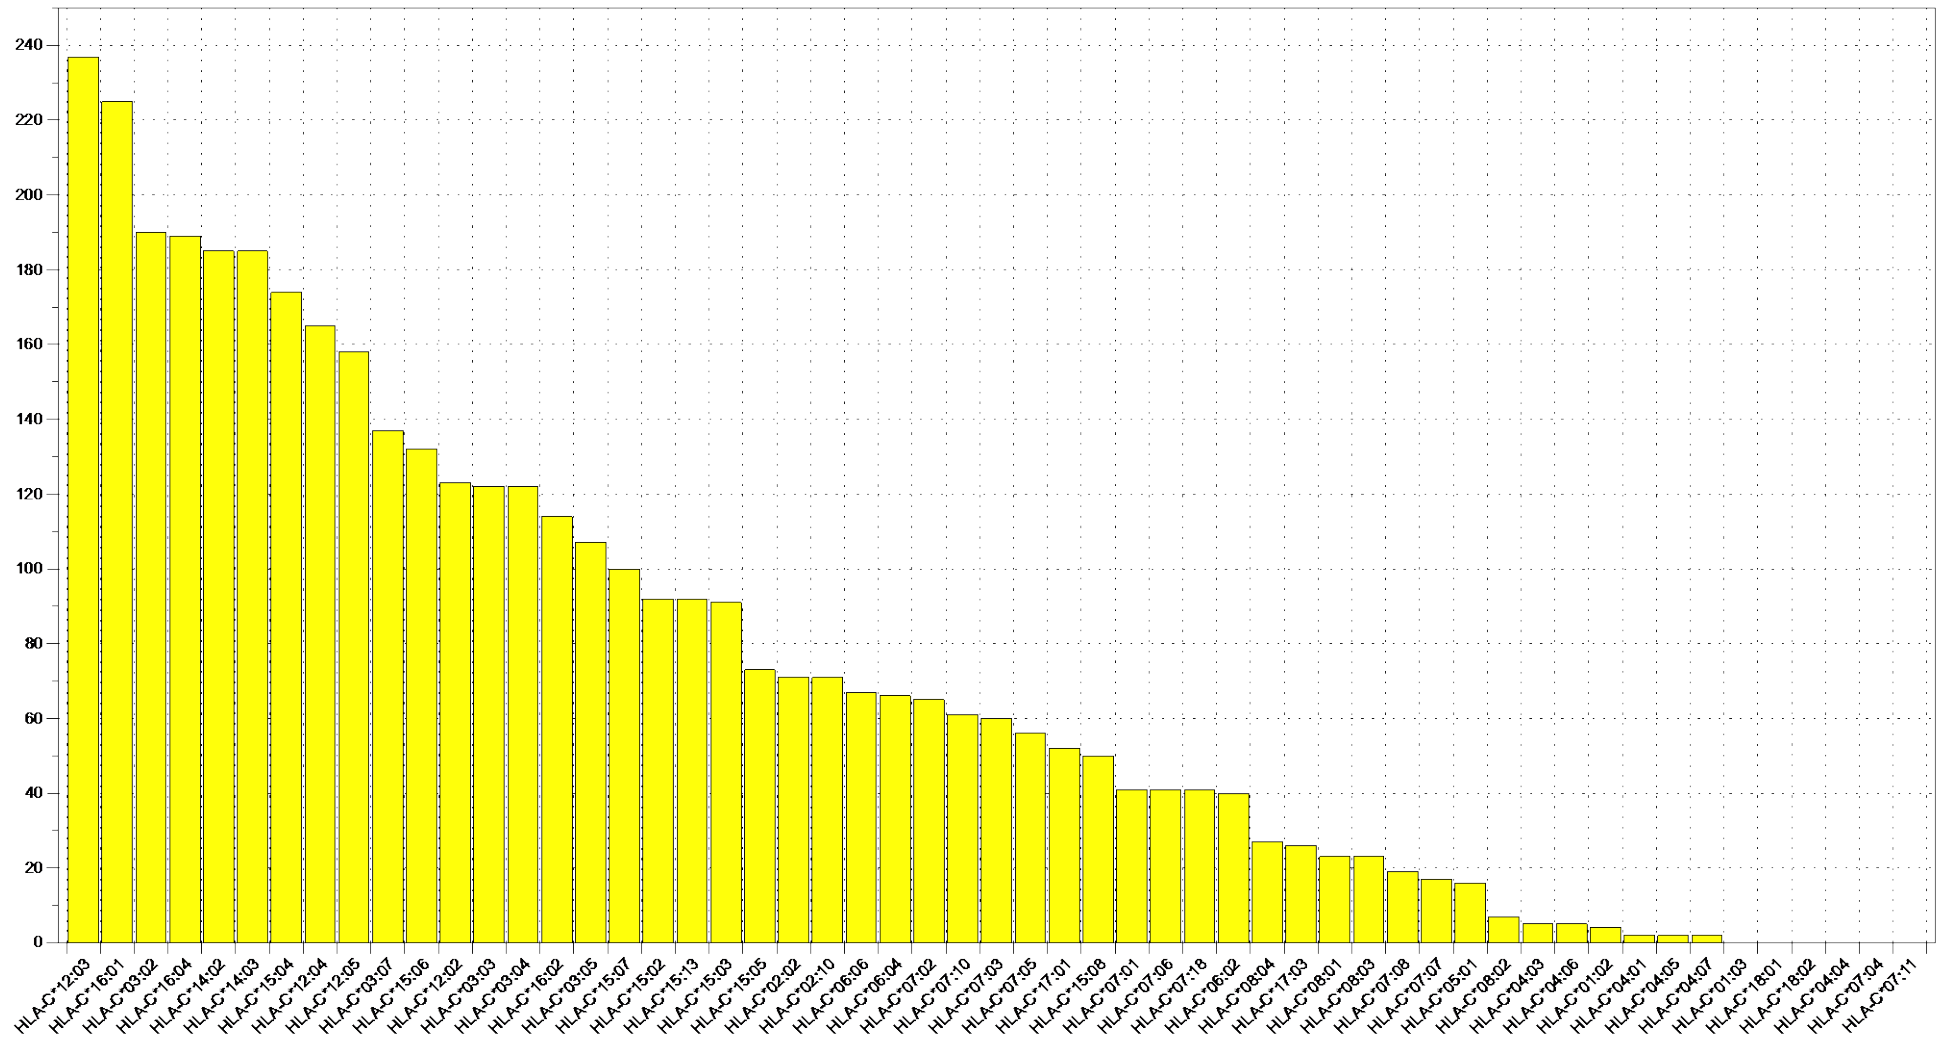

Alleles are ordered on the x-axis by their regular ( $50 \text{ nM} < \text{IC}_{50} \leq 500 \text{ nM}$ ) binding prediction and the number of peptides presented are displayed on the y-axis.

## HLA-C alleles ordered by number of presented peptides with weak binding prediction

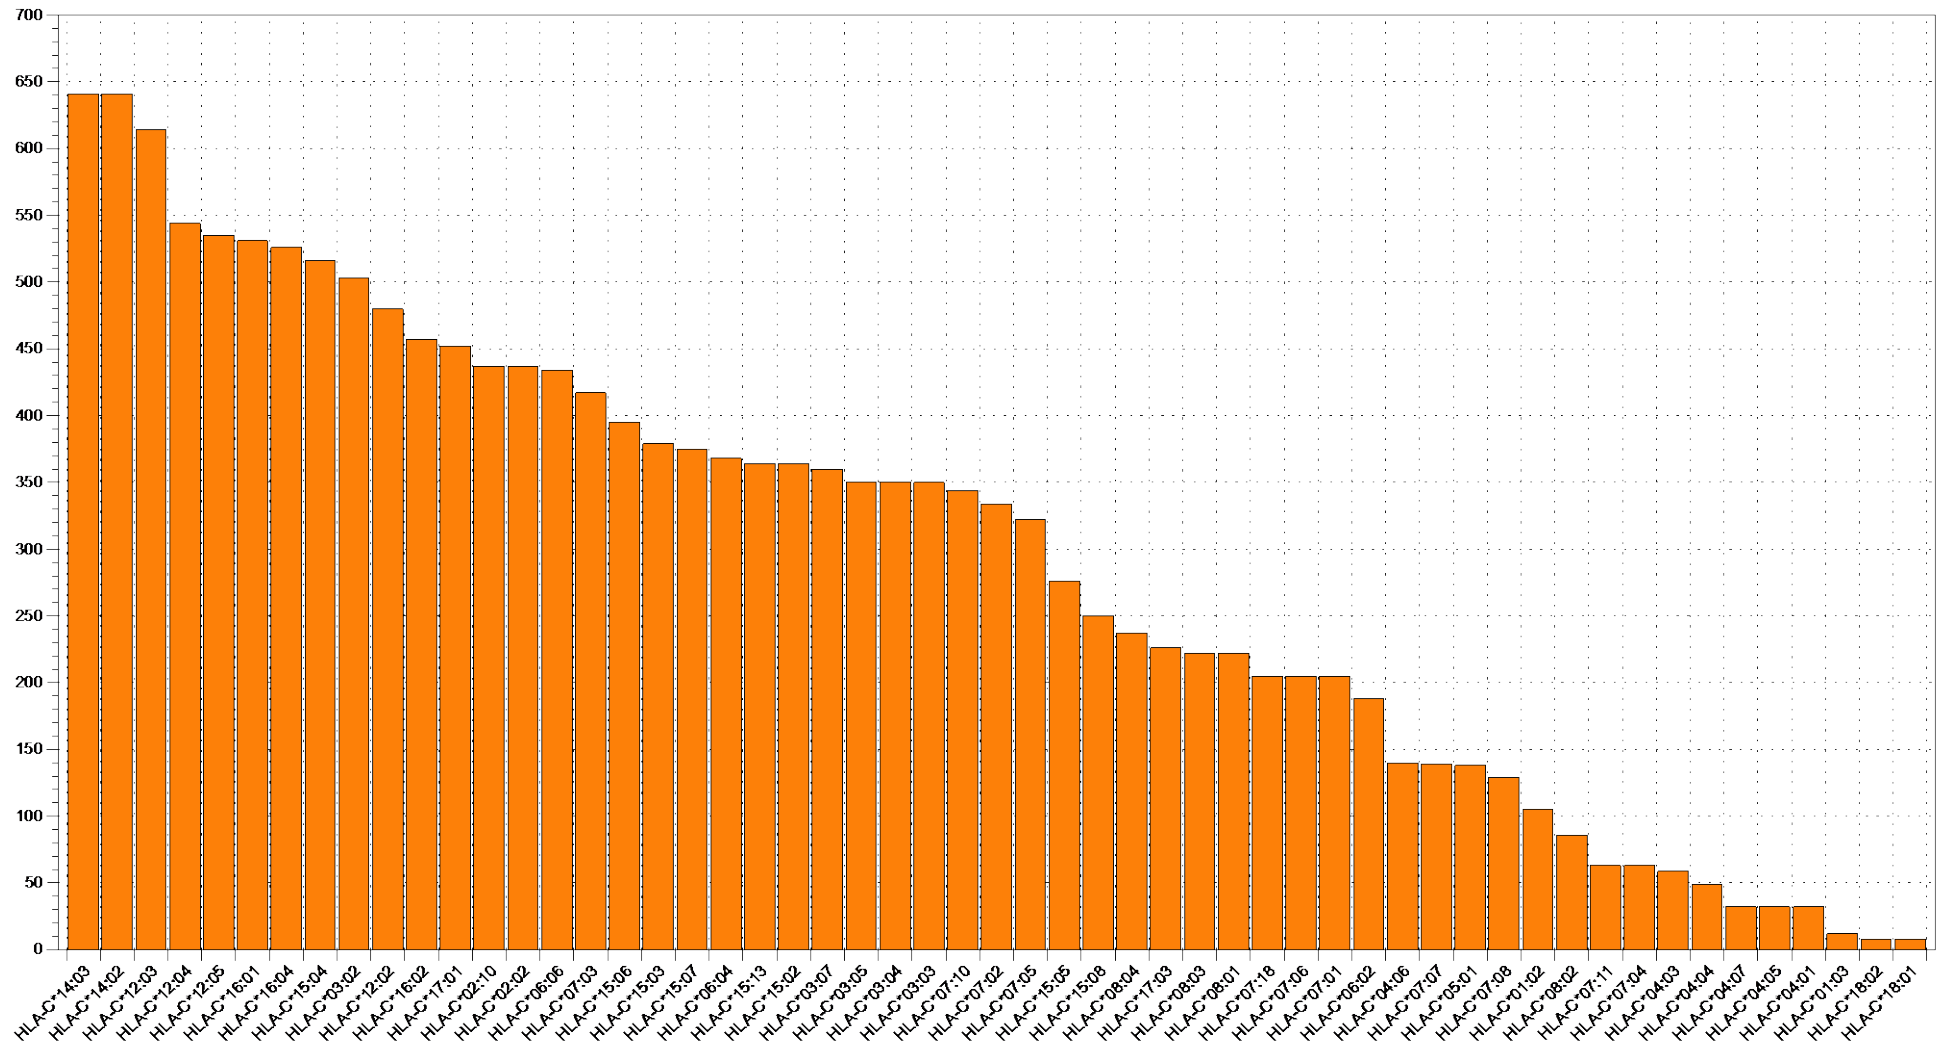

Alleles are ordered on the x-axis by their weak (500 nM < IC<sub>50</sub> ≤ 5000 nM) binding prediction and the number of peptides presented are displayed on the y-axis.

## Total number of peptides with strong, regular and weak binding predictions for *HLA-DRB1*

|                | IC <sub>50</sub> ≤ 50 nM<br>Strong binders | 50 nM < IC <sub>50</sub> ≤ 1000 nM<br>Regular binders | 1000 nM < IC <sub>50</sub> ≤ 5000 nM<br>Weak binders | IC <sub>50</sub> > 5000 nM<br>Non binders |
|----------------|--------------------------------------------|-------------------------------------------------------|------------------------------------------------------|-------------------------------------------|
| HLA-DRB1*01:01 | 357                                        | 2099                                                  | 1330                                                 | 645                                       |
| HLA-DRB1*01:02 | 7                                          | 1088                                                  | 1754                                                 | 1582                                      |
| HLA-DRB1*01:03 | 0                                          | 256                                                   | 1311                                                 | 2864                                      |
| HLA-DRB1*01:04 | 115                                        | 1985                                                  | 1537                                                 | 794                                       |
| HLA-DRB1*03:01 | 1                                          | 545                                                   | 1720                                                 | 2165                                      |
| HLA-DRB1*03:02 | 0                                          | 0                                                     | 94                                                   | 4337                                      |
| HLA-DRB1*03:03 | 0                                          | 35                                                    | 538                                                  | 3858                                      |
| HLA-DRB1*03:04 | 1                                          | 545                                                   | 1720                                                 | 2165                                      |
| HLA-DRB1*03:05 | 0                                          | 152                                                   | 1206                                                 | 3073                                      |
| HLA-DRB1*03:06 | 0                                          | 341                                                   | 1693                                                 | 2397                                      |
| HLA-DRB1*03:07 | 0                                          | 235                                                   | 1334                                                 | 2862                                      |
| HLA-DRB1*03:08 | 1                                          | 545                                                   | 1720                                                 | 2165                                      |
| HLA-DRB1*04:01 | 14                                         | 1130                                                  | 2000                                                 | 1287                                      |
| HLA-DRB1*04:02 | 0                                          | 711                                                   | 1656                                                 | 2064                                      |
| HLA-DRB1*04:03 | 0                                          | 533                                                   | 1664                                                 | 2234                                      |
| HLA-DRB1*04:04 | 15                                         | 1336                                                  | 1672                                                 | 1408                                      |
| HLA-DRB1*04:05 | 10                                         | 1040                                                  | 1864                                                 | 1517                                      |
| HLA-DRB1*04:06 | 0                                          | 533                                                   | 1664                                                 | 2234                                      |
| HLA-DRB1*04:07 | 0                                          | 227                                                   | 1434                                                 | 2770                                      |
| HLA-DRB1*04:08 | 9                                          | 899                                                   | 1897                                                 | 1626                                      |
| HLA-DRB1*04:10 | 4                                          | 1248                                                  | 1690                                                 | 1489                                      |
| HLA-DRB1*04:11 | 0                                          | 633                                                   | 1693                                                 | 2105                                      |
| HLA-DRB1*04:13 | 13                                         | 1597                                                  | 1808                                                 | 1013                                      |
| HLA-DRB1*04:15 | 0                                          | 249                                                   | 1078                                                 | 3104                                      |
| HLA-DRB1*04:17 | 0                                          | 296                                                   | 1665                                                 | 2470                                      |
| HLA-DRB1*07:01 | 71                                         | 1376                                                  | 1583                                                 | 1401                                      |
| HLA-DRB1*08:01 | 1                                          | 868                                                   | 1686                                                 | 1876                                      |
| HLA-DRB1*08:02 | 0                                          | 643                                                   | 1762                                                 | 2026                                      |
| HLA-DRB1*08:03 | 0                                          | 179                                                   | 1614                                                 | 2638                                      |
| HLA-DRB1*08:04 | 6                                          | 769                                                   | 1647                                                 | 2009                                      |
| HLA-DRB1*08:05 | 14                                         | 905                                                   | 1563                                                 | 1949                                      |
| HLA-DRB1*08:06 | 3                                          | 701                                                   | 1626                                                 | 2101                                      |
| HLA-DRB1*08:07 | 0                                          | 1217                                                  | 1833                                                 | 1381                                      |
| HLA-DRB1*08:09 | 0                                          | 643                                                   | 1762                                                 | 2026                                      |
| HLA-DRB1*08:10 | 0                                          | 639                                                   | 1740                                                 | 2052                                      |
| HLA-DRB1*08:11 | 0                                          | 1257                                                  | 1812                                                 | 1362                                      |
| HLA-DRB1*08:12 | 0                                          | 187                                                   | 1569                                                 | 2675                                      |
| HLA-DRB1*09:01 | 14                                         | 1351                                                  | 1832                                                 | 1234                                      |
| HLA-DRB1*10:01 | 136                                        | 2042                                                  | 1482                                                 | 771                                       |
| HLA-DRB1*11:01 | 63                                         | 1068                                                  | 1404                                                 | 1896                                      |
| HLA-DRB1*11:02 | 153                                        | 1761                                                  | 1375                                                 | 1142                                      |
| HLA-DRB1*11:03 | 77                                         | 1255                                                  | 1679                                                 | 1420                                      |
| HLA-DRB1*11:04 | 45                                         | 919                                                   | 1539                                                 | 1928                                      |
| HLA-DRB1*11:05 | 21                                         | 1117                                                  | 1602                                                 | 1691                                      |
| HLA-DRB1*11:06 | 11                                         | 518                                                   | 1356                                                 | 2546                                      |
| HLA-DRB1*11:08 | 9                                          | 1579                                                  | 1738                                                 | 1105                                      |
| HLA-DRB1*11:09 | 63                                         | 1068                                                  | 1404                                                 | 1896                                      |
| HLA-DRB1*11:10 | 63                                         | 1068                                                  | 1404                                                 | 1896                                      |
| HLA-DRB1*11:11 | 58                                         | 1304                                                  | 1506                                                 | 1563                                      |
| HLA-DRB1*11:12 | 63                                         | 1068                                                  | 1404                                                 | 1896                                      |
| HLA-DRB1*11:14 | 75                                         | 1123                                                  | 1677                                                 | 1556                                      |
| HLA-DRB1*11:15 | 63                                         | 1068                                                  | 1404                                                 | 1896                                      |
| HLA-DRB1*11:19 | 2                                          | 804                                                   | 1803                                                 | 1822                                      |
| HLA-DRB1*11:28 | 63                                         | 1068                                                  | 1404                                                 | 1896                                      |
| HLA-DRB1*12:01 | 0                                          | 470                                                   | 1469                                                 | 2492                                      |
| HLA-DRB1*12:02 | 0                                          | 255                                                   | 1163                                                 | 3013                                      |
| HLA-DRB1*12:03 | 0                                          | 868                                                   | 1630                                                 | 1933                                      |
| HLA-DRB1*13:01 | 153                                        | 1761                                                  | 1375                                                 | 1142                                      |
| HLA-DRB1*13:02 | 75                                         | 1123                                                  | 1677                                                 | 1556                                      |
| HLA-DRB1*13:03 | 0                                          | 767                                                   | 1969                                                 | 1695                                      |
| HLA-DRB1*13:04 | 91                                         | 1581                                                  | 1549                                                 | 1210                                      |
| HLA-DRB1*13:05 | 63                                         | 1068                                                  | 1404                                                 | 1896                                      |

|                | <b>IC<sub>50</sub> ≤ 50 nM</b><br><b>Strong binders</b> | <b>50 nM &lt; IC<sub>50</sub> ≤ 1000 nM</b><br><b>Regular binders</b> | <b>1000 nM &lt; IC<sub>50</sub> ≤ 5000 nM</b><br><b>Weak binders</b> | <b>IC<sub>50</sub> &gt; 5000 nM</b><br><b>Non binders</b> |
|----------------|---------------------------------------------------------|-----------------------------------------------------------------------|----------------------------------------------------------------------|-----------------------------------------------------------|
| HLA-DRB1*13:06 | 31                                                      | 1268                                                                  | 1567                                                                 | 1565                                                      |
| HLA-DRB1*13:07 | 35                                                      | 848                                                                   | 1444                                                                 | 2104                                                      |
| HLA-DRB1*13:08 | 79                                                      | 1624                                                                  | 1533                                                                 | 1195                                                      |
| HLA-DRB1*13:10 | 0                                                       | 426                                                                   | 1763                                                                 | 2242                                                      |
| HLA-DRB1*13:11 | 45                                                      | 919                                                                   | 1539                                                                 | 1928                                                      |
| HLA-DRB1*13:12 | 0                                                       | 777                                                                   | 1855                                                                 | 1799                                                      |
| HLA-DRB1*13:22 | 153                                                     | 1761                                                                  | 1375                                                                 | 1142                                                      |
| HLA-DRB1*14:01 | 0                                                       | 1586                                                                  | 1993                                                                 | 852                                                       |
| HLA-DRB1*14:02 | 0                                                       | 753                                                                   | 2094                                                                 | 1584                                                      |
| HLA-DRB1*14:03 | 0                                                       | 324                                                                   | 1630                                                                 | 2477                                                      |
| HLA-DRB1*14:04 | 0                                                       | 1249                                                                  | 2203                                                                 | 979                                                       |
| HLA-DRB1*14:05 | 0                                                       | 922                                                                   | 2051                                                                 | 1458                                                      |
| HLA-DRB1*14:06 | 13                                                      | 1462                                                                  | 1877                                                                 | 1079                                                      |
| HLA-DRB1*14:07 | 0                                                       | 628                                                                   | 2334                                                                 | 1469                                                      |
| HLA-DRB1*14:08 | 0                                                       | 922                                                                   | 2051                                                                 | 1458                                                      |
| HLA-DRB1*14:09 | 5                                                       | 1375                                                                  | 2104                                                                 | 947                                                       |
| HLA-DRB1*14:10 | 0                                                       | 695                                                                   | 1834                                                                 | 1902                                                      |
| HLA-DRB1*14:12 | 0                                                       | 769                                                                   | 1834                                                                 | 1828                                                      |
| HLA-DRB1*14:13 | 0                                                       | 794                                                                   | 2152                                                                 | 1485                                                      |
| HLA-DRB1*14:14 | 0                                                       | 327                                                                   | 1908                                                                 | 2196                                                      |
| HLA-DRB1*14:18 | 0                                                       | 467                                                                   | 1913                                                                 | 2051                                                      |
| HLA-DRB1*14:54 | 0                                                       | 1586                                                                  | 1993                                                                 | 852                                                       |
| HLA-DRB1*15:01 | 9                                                       | 1058                                                                  | 1468                                                                 | 1896                                                      |
| HLA-DRB1*15:02 | 3                                                       | 592                                                                   | 1691                                                                 | 2145                                                      |
| HLA-DRB1*15:03 | 0                                                       | 390                                                                   | 1366                                                                 | 2675                                                      |
| HLA-DRB1*15:04 | 7                                                       | 777                                                                   | 1547                                                                 | 2100                                                      |
| HLA-DRB1*15:06 | 9                                                       | 1058                                                                  | 1468                                                                 | 1896                                                      |
| HLA-DRB1*15:11 | 2                                                       | 475                                                                   | 1686                                                                 | 2268                                                      |
| HLA-DRB1*16:01 | 3                                                       | 624                                                                   | 1466                                                                 | 2338                                                      |
| HLA-DRB1*16:02 | 10                                                      | 1143                                                                  | 1806                                                                 | 1472                                                      |
| HLA-DRB1*16:03 | 3                                                       | 624                                                                   | 1466                                                                 | 2338                                                      |
| HLA-DRB1*16:05 | 2                                                       | 577                                                                   | 1695                                                                 | 2157                                                      |

Alleles are ordered alphabetically.

## General binding prediction tendencies for *HLA-DRB1*

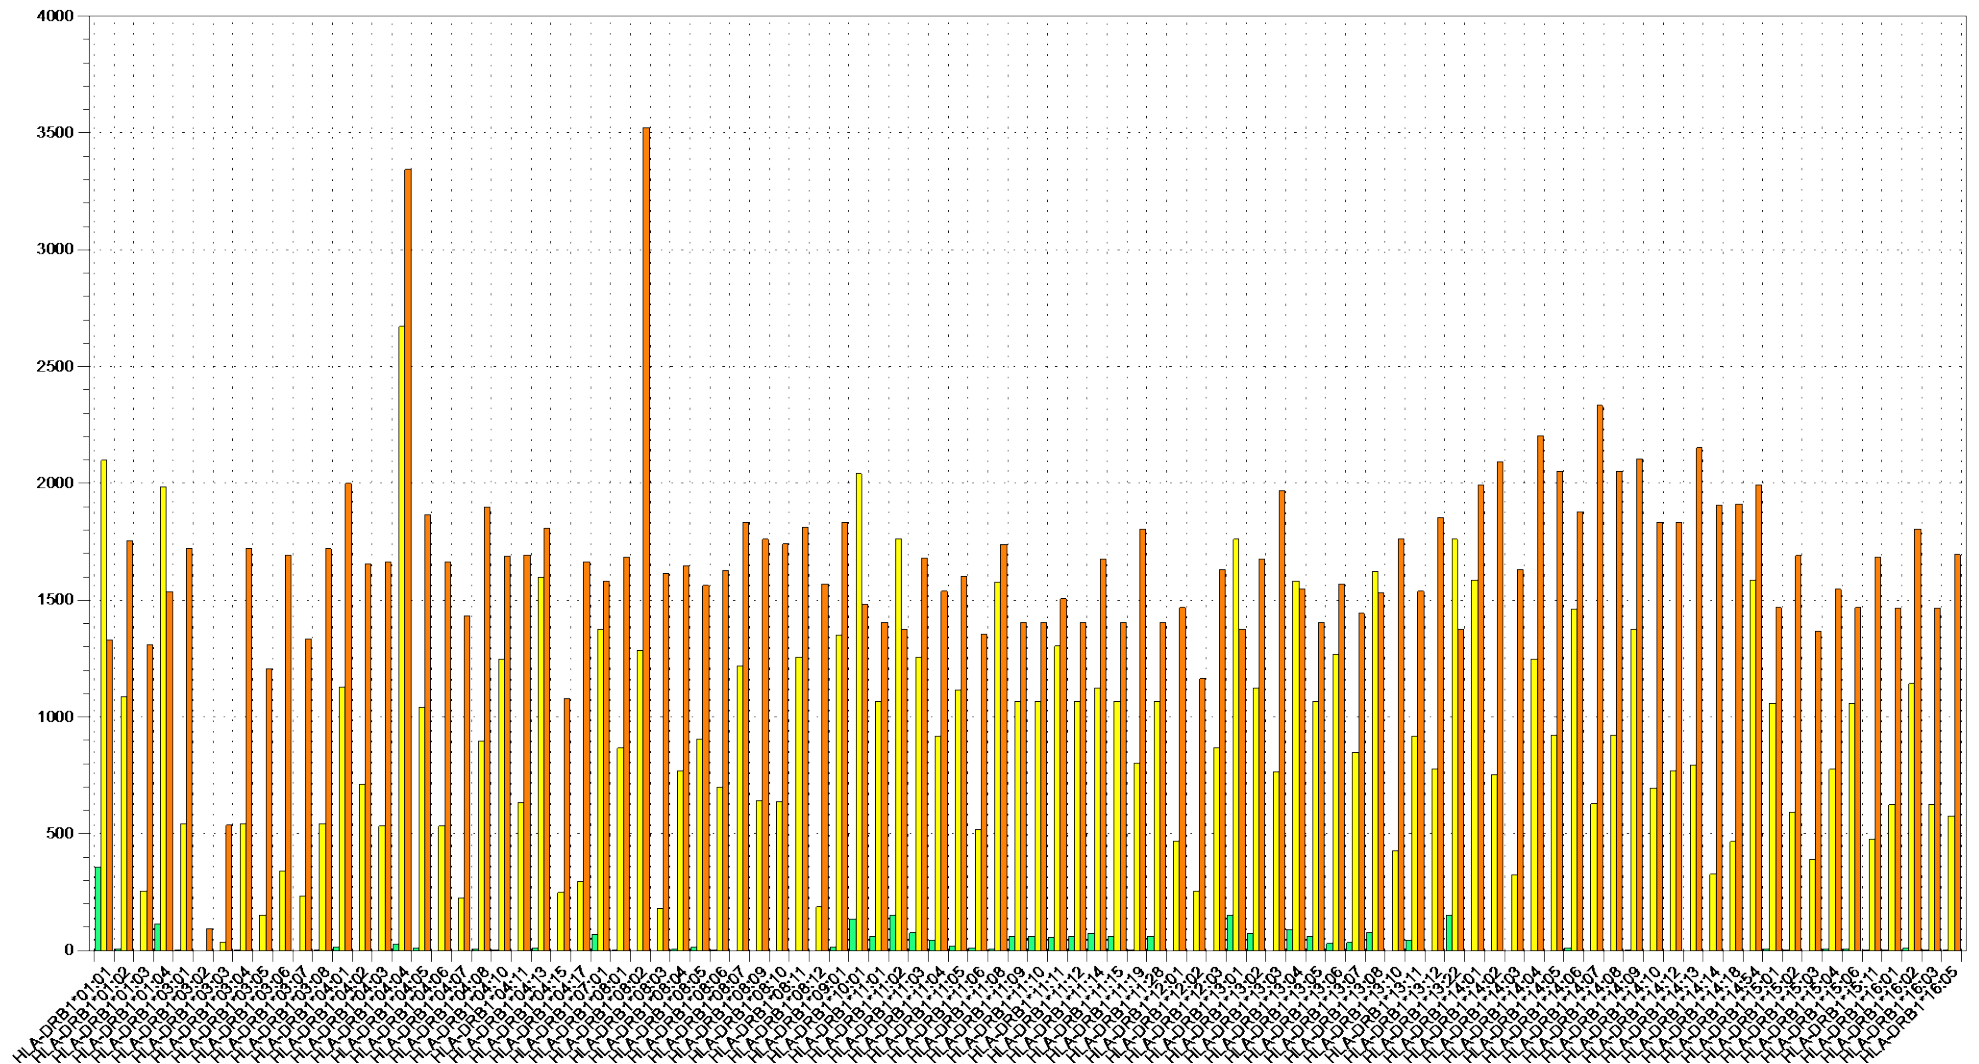

Alleles are ordered alphabetically on the x-axis, while the number of peptides binding with strong ( $IC_{50} \leq 50$  nM), regular ( $50$  nM  $< IC_{50} \leq 1000$  nM) and weak ( $1000$  nM  $< IC_{50} \leq 5000$  nM) binding prediction are displayed on the y-axis.

## HLA-DRB1 alleles ordered by number of presented peptides with strong binding prediction

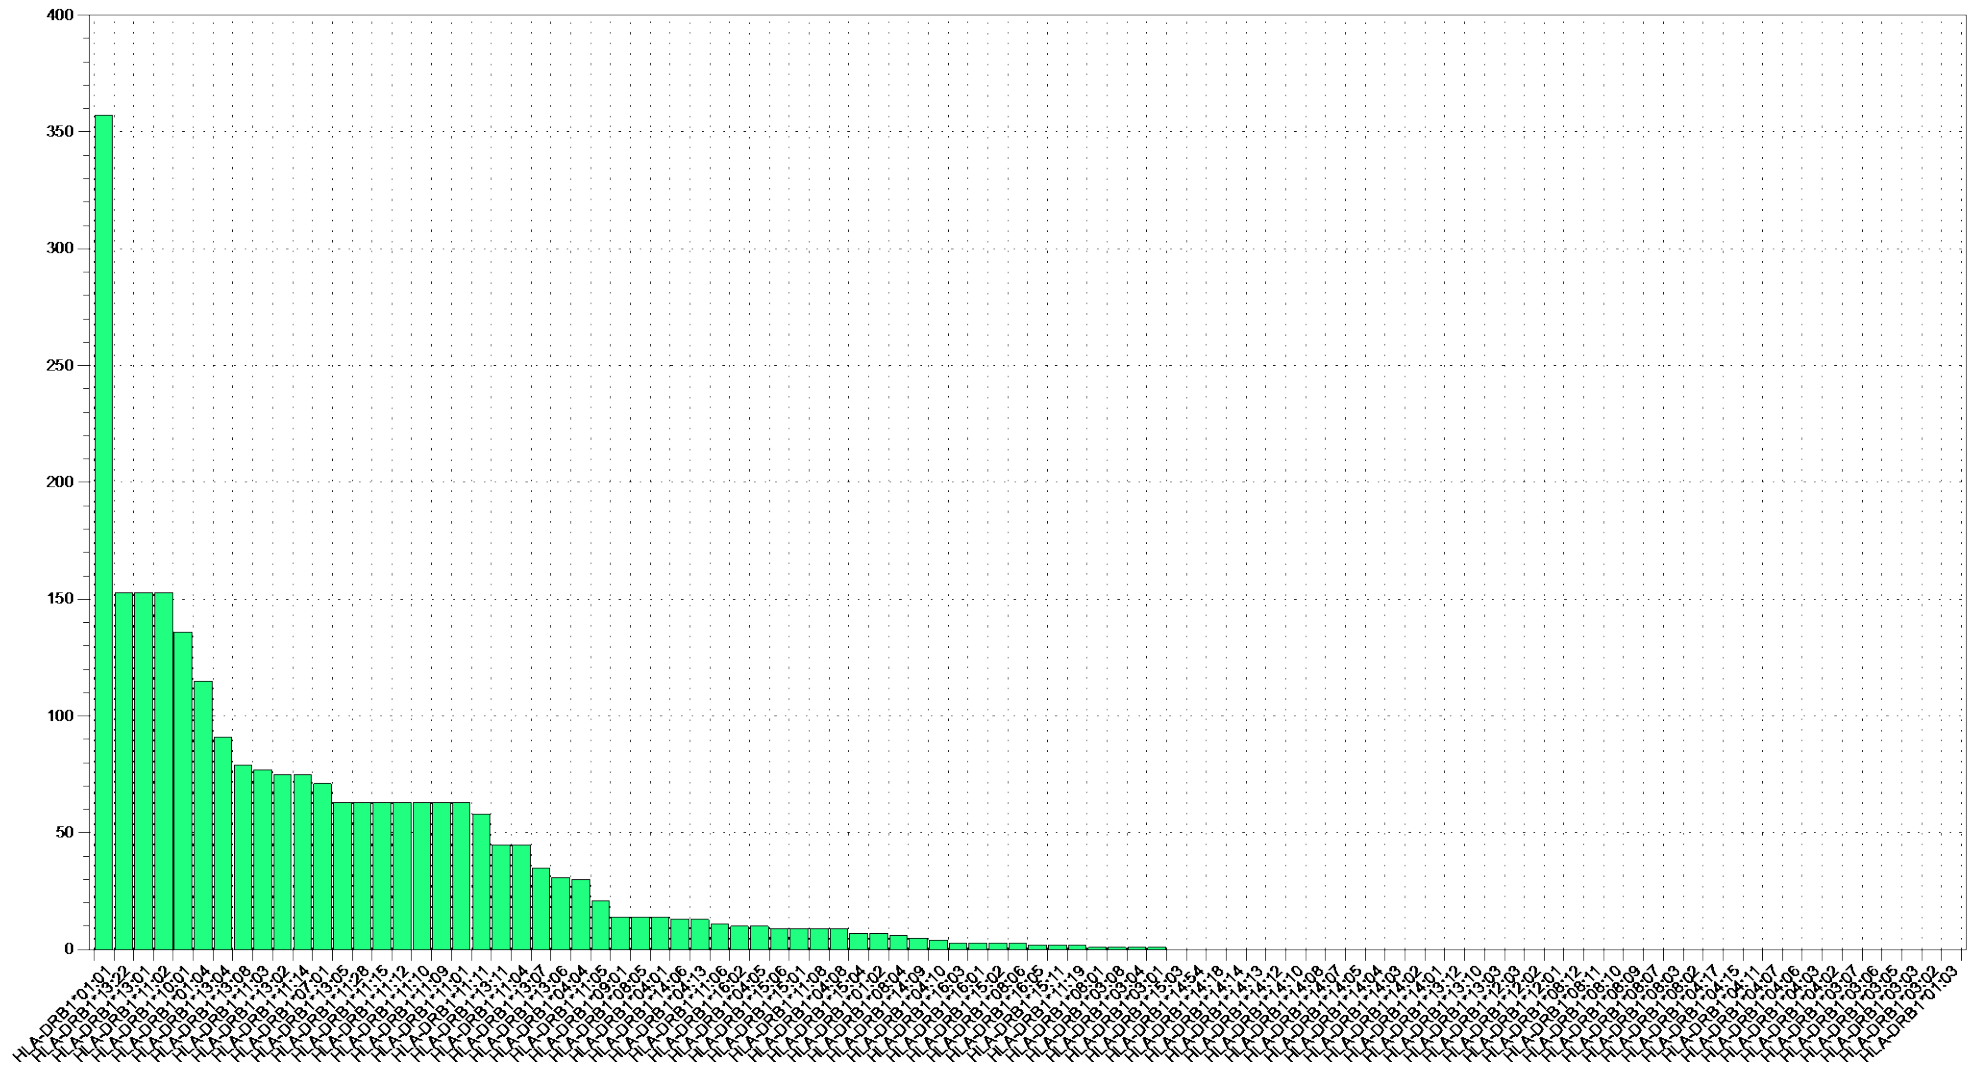

Alleles are ordered on the x-axis by their strong ( $IC_{50} \leq 50$  nM) binding prediction and the number of peptides presented are displayed on the y-axis.





## HLA-DRB1 alleles ordered by number of presented peptides with weak binding prediction

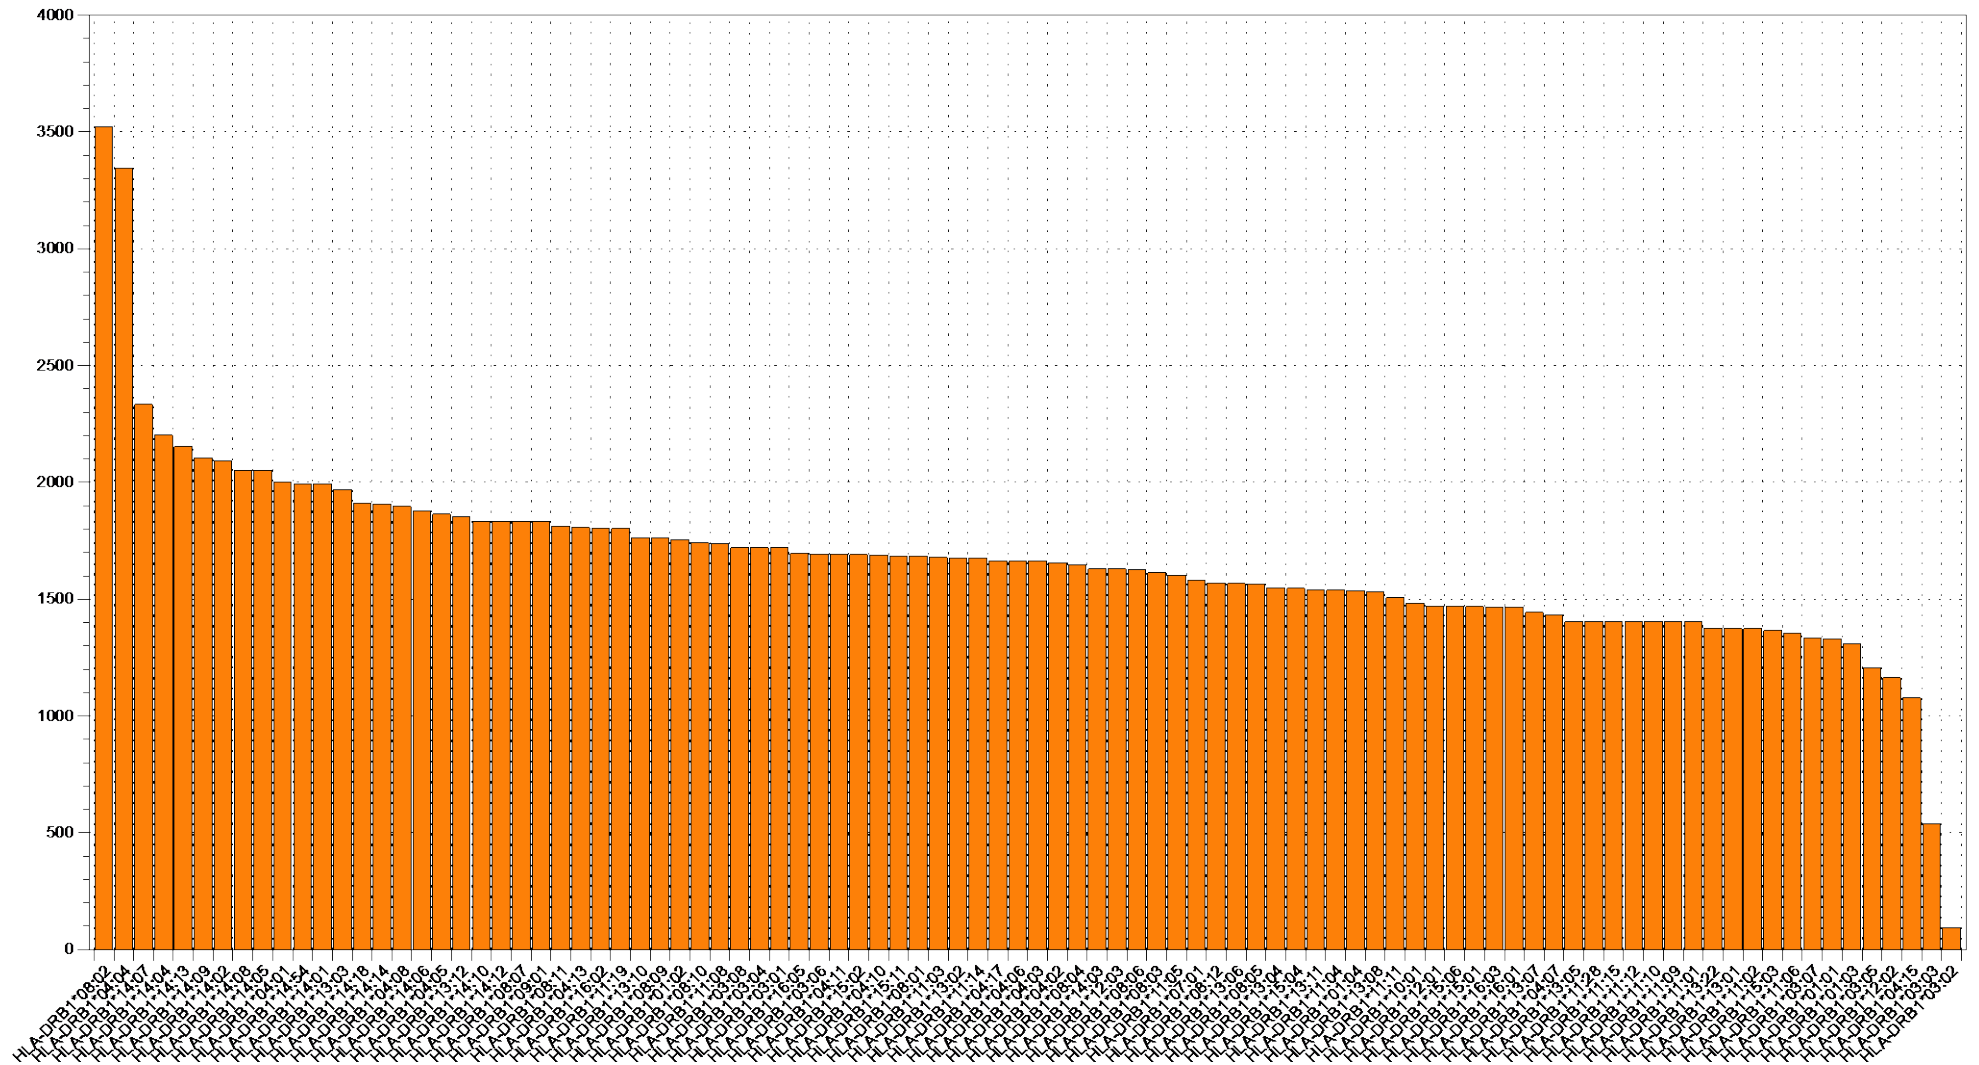

Alleles are ordered on the x-axis by their weak ( $1000 \text{ nM} < IC_{50} \leq 5000 \text{ nM}$ ) binding prediction and the number of peptides presented are displayed on the y-axis.

**Total number of peptides with strong, regular and weak binding predictions for *HLA-DQA1/-DQB1***

|                           | <b>IC<sub>50</sub> ≤ 50 nM<br/>Strong binders</b> | <b>50 nM &lt; IC<sub>50</sub> ≤ 1000 nM<br/>Regular binders</b> | <b>1000 nM &lt; IC<sub>50</sub> ≤ 5000 nM<br/>Weak binders</b> | <b>IC<sub>50</sub> &gt; 5000 nM<br/>Non binders</b> |
|---------------------------|---------------------------------------------------|-----------------------------------------------------------------|----------------------------------------------------------------|-----------------------------------------------------|
| HLA-DQA1*05:01/DQB1*02:01 | 0                                                 | 427                                                             | 1763                                                           | 2241                                                |
| HLA-DQA1*02:01/DQB1*02:01 | 0                                                 | 71                                                              | 978                                                            | 3382                                                |
| HLA-DQA1*02:01/DQB1*02:02 | 0                                                 | 71                                                              | 978                                                            | 3382                                                |
| HLA-DQA1*05:01/DQB1*02:03 | 0                                                 | 372                                                             | 2199                                                           | 1860                                                |
| HLA-DQA1*05:01/DQB1*03:01 | 7                                                 | 631                                                             | 1848                                                           | 1945                                                |
| HLA-DQA1*03:01/DQB1*03:02 | 0                                                 | 60                                                              | 1525                                                           | 2846                                                |
| HLA-DQA1*02:01/DQB1*03:03 | 1                                                 | 709                                                             | 1891                                                           | 1830                                                |
| HLA-DQA1*03:01/DQB1*03:03 | 0                                                 | 116                                                             | 1692                                                           | 2623                                                |
| HLA-DQA1*03:02/DQB1*03:03 | 0                                                 | 116                                                             | 1692                                                           | 2623                                                |
| HLA-DQA1*03:01/DQB1*03:04 | 0                                                 | 254                                                             | 2321                                                           | 1856                                                |
| HLA-DQA1*03:01/DQB1*03:05 | 0                                                 | 82                                                              | 2351                                                           | 1998                                                |
| HLA-DQA1*05:01/DQB1*03:05 | 0                                                 | 783                                                             | 2636                                                           | 1012                                                |
| HLA-DQA1*03:01/DQB1*03:07 | 0                                                 | 60                                                              | 1525                                                           | 2846                                                |
| HLA-DQA1*01:03/DQB1*03:19 | 1                                                 | 778                                                             | 2131                                                           | 1521                                                |
| HLA-DQA1*01:05/DQB1*03:19 | 0                                                 | 90                                                              | 1607                                                           | 2734                                                |
| HLA-DQA1*05:05/DQB1*03:19 | 7                                                 | 631                                                             | 1848                                                           | 1945                                                |
| HLA-DQA1*03:01/DQB1*04:01 | 0                                                 | 41                                                              | 1273                                                           | 3117                                                |
| HLA-DQA1*03:03/DQB1*04:01 | 0                                                 | 41                                                              | 1273                                                           | 3117                                                |
| HLA-DQA1*04:01/DQB1*04:01 | 0                                                 | 77                                                              | 1642                                                           | 2712                                                |
| HLA-DQA1*04:01/DQB1*04:02 | 0                                                 | 77                                                              | 1642                                                           | 2712                                                |
| HLA-DQA1*01:01/DQB1*05:01 | 0                                                 | 123                                                             | 785                                                            | 3523                                                |
| HLA-DQA1*01:02/DQB1*05:02 | 0                                                 | 90                                                              | 935                                                            | 3406                                                |
| HLA-DQA1*01:01/DQB1*05:03 | 0                                                 | 6                                                               | 565                                                            | 3860                                                |
| HLA-DQA1*01:03/DQB1*06:01 | 0                                                 | 270                                                             | 2086                                                           | 2075                                                |
| HLA-DQA1*01:02/DQB1*06:02 | 0                                                 | 333                                                             | 1967                                                           | 2131                                                |
| HLA-DQA1*01:03/DQB1*06:02 | 0                                                 | 447                                                             | 1980                                                           | 2004                                                |
| HLA-DQA1*01:02/DQB1*06:03 | 0                                                 | 0                                                               | 471                                                            | 3960                                                |
| HLA-DQA1*01:03/DQB1*06:03 | 0                                                 | 16                                                              | 529                                                            | 3886                                                |
| HLA-DQA1*01:02/DQB1*06:08 | 0                                                 | 7                                                               | 878                                                            | 3546                                                |
| HLA-DQA1*01:02/DQB1*06:09 | 0                                                 | 0                                                               | 12                                                             | 4419                                                |
| HLA-DQA1*01:02/DQB1*06:10 | 0                                                 | 8                                                               | 1386                                                           | 3037                                                |
| HLA-DQA1*01:02/DQB1*06:11 | 0                                                 | 164                                                             | 1658                                                           | 2609                                                |
| HLA-DQA1*01:03/DQB1*06:11 | 0                                                 | 299                                                             | 1823                                                           | 2309                                                |
| HLA-DQA1*01:02/DQB1*06:14 | 0                                                 | 2                                                               | 704                                                            | 3725                                                |

Allele combinations are ordered alphabetically.

## General binding prediction tendencies for *HLA-DQA1/DQB1*

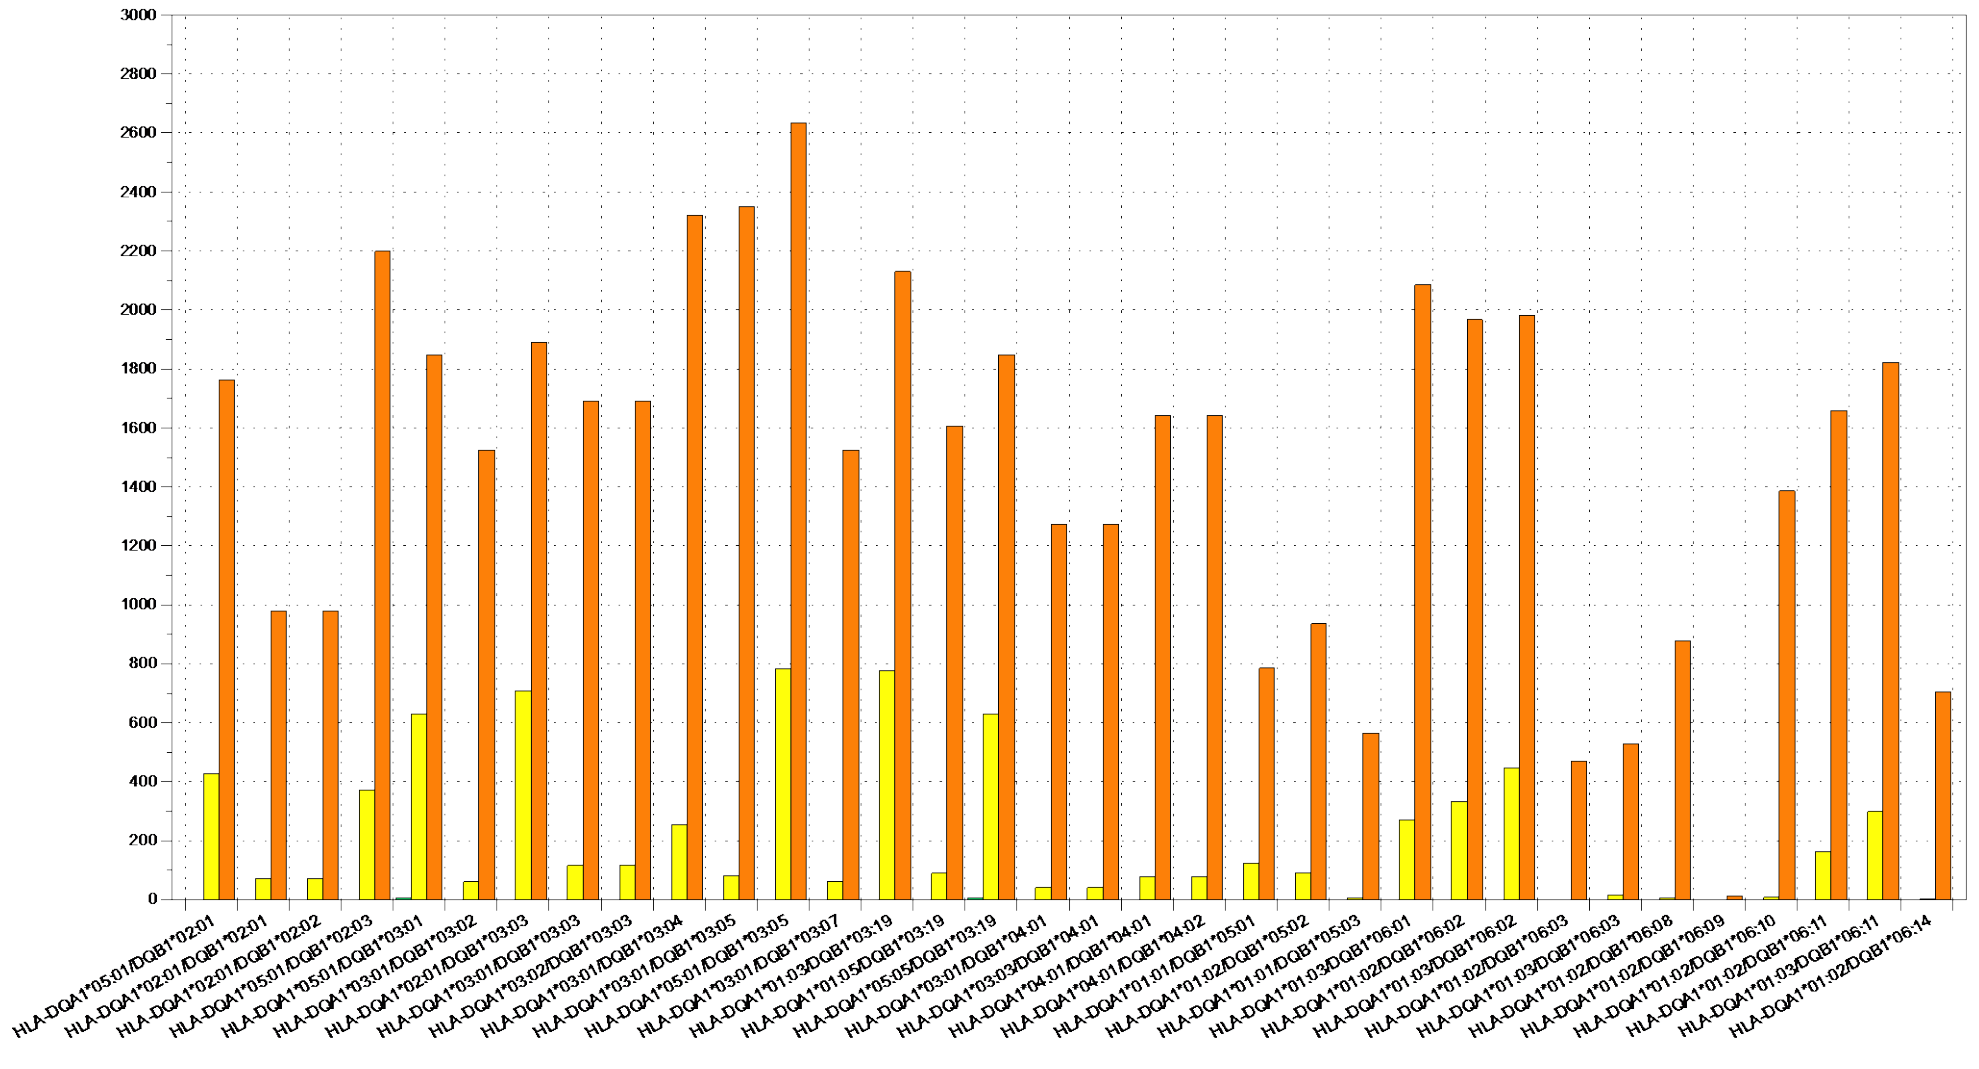

Allele combinations are ordered alphabetically on the x-axis, while the number of peptides binding with strong ( $IC_{50} \leq 50$  nM), regular ( $50$  nM  $< IC_{50} \leq 1000$  nM) and weak ( $1000$  nM  $< IC_{50} \leq 5000$  nM) binding prediction are displayed on the y-axis.

## HLA-DQA1/-DQB1 alleles ordered by number of presented peptides with strong binding prediction

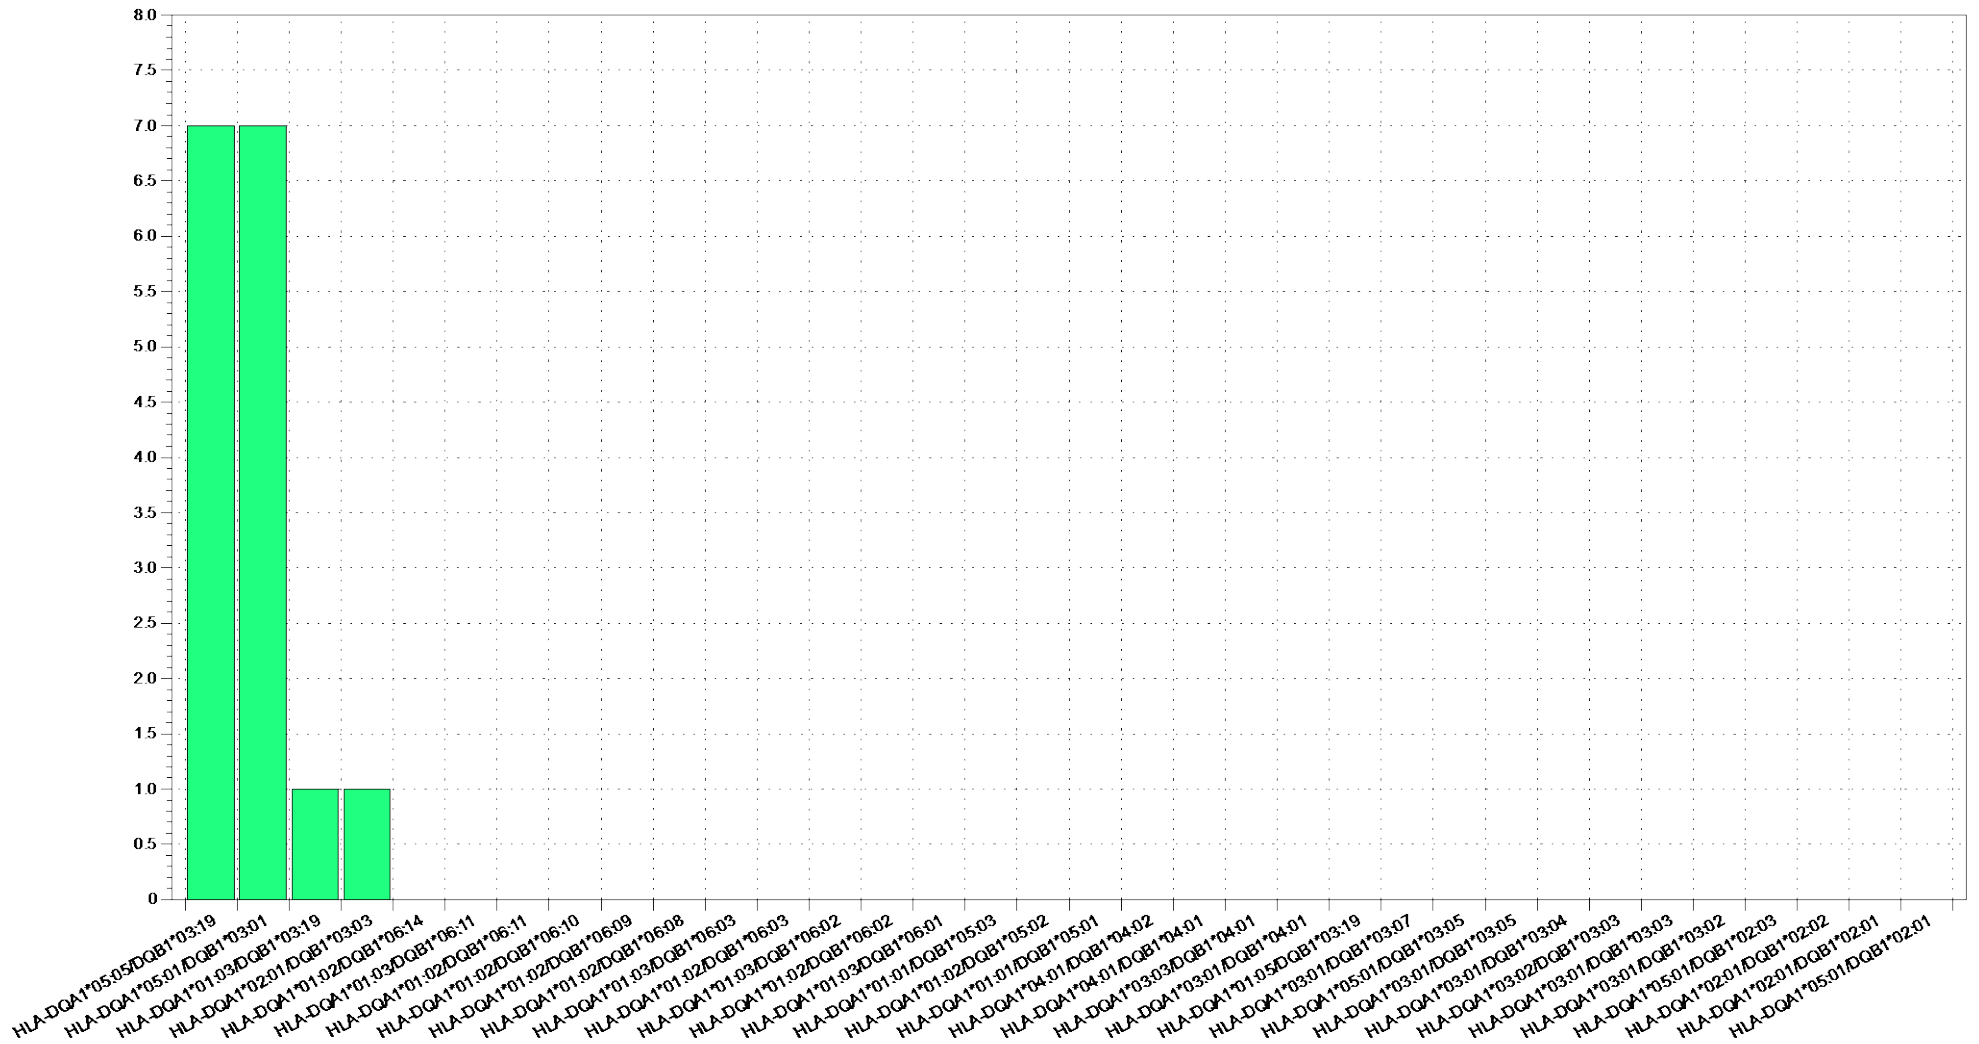

Allele combinations are ordered on the x-axis by their strong ( $IC_{50} \leq 50$  nM) binding prediction and the number of peptides presented are displayed on the y-axis.

## HLA-DQA1/-DQB1 alleles ordered by number of presented peptides with regular binding prediction

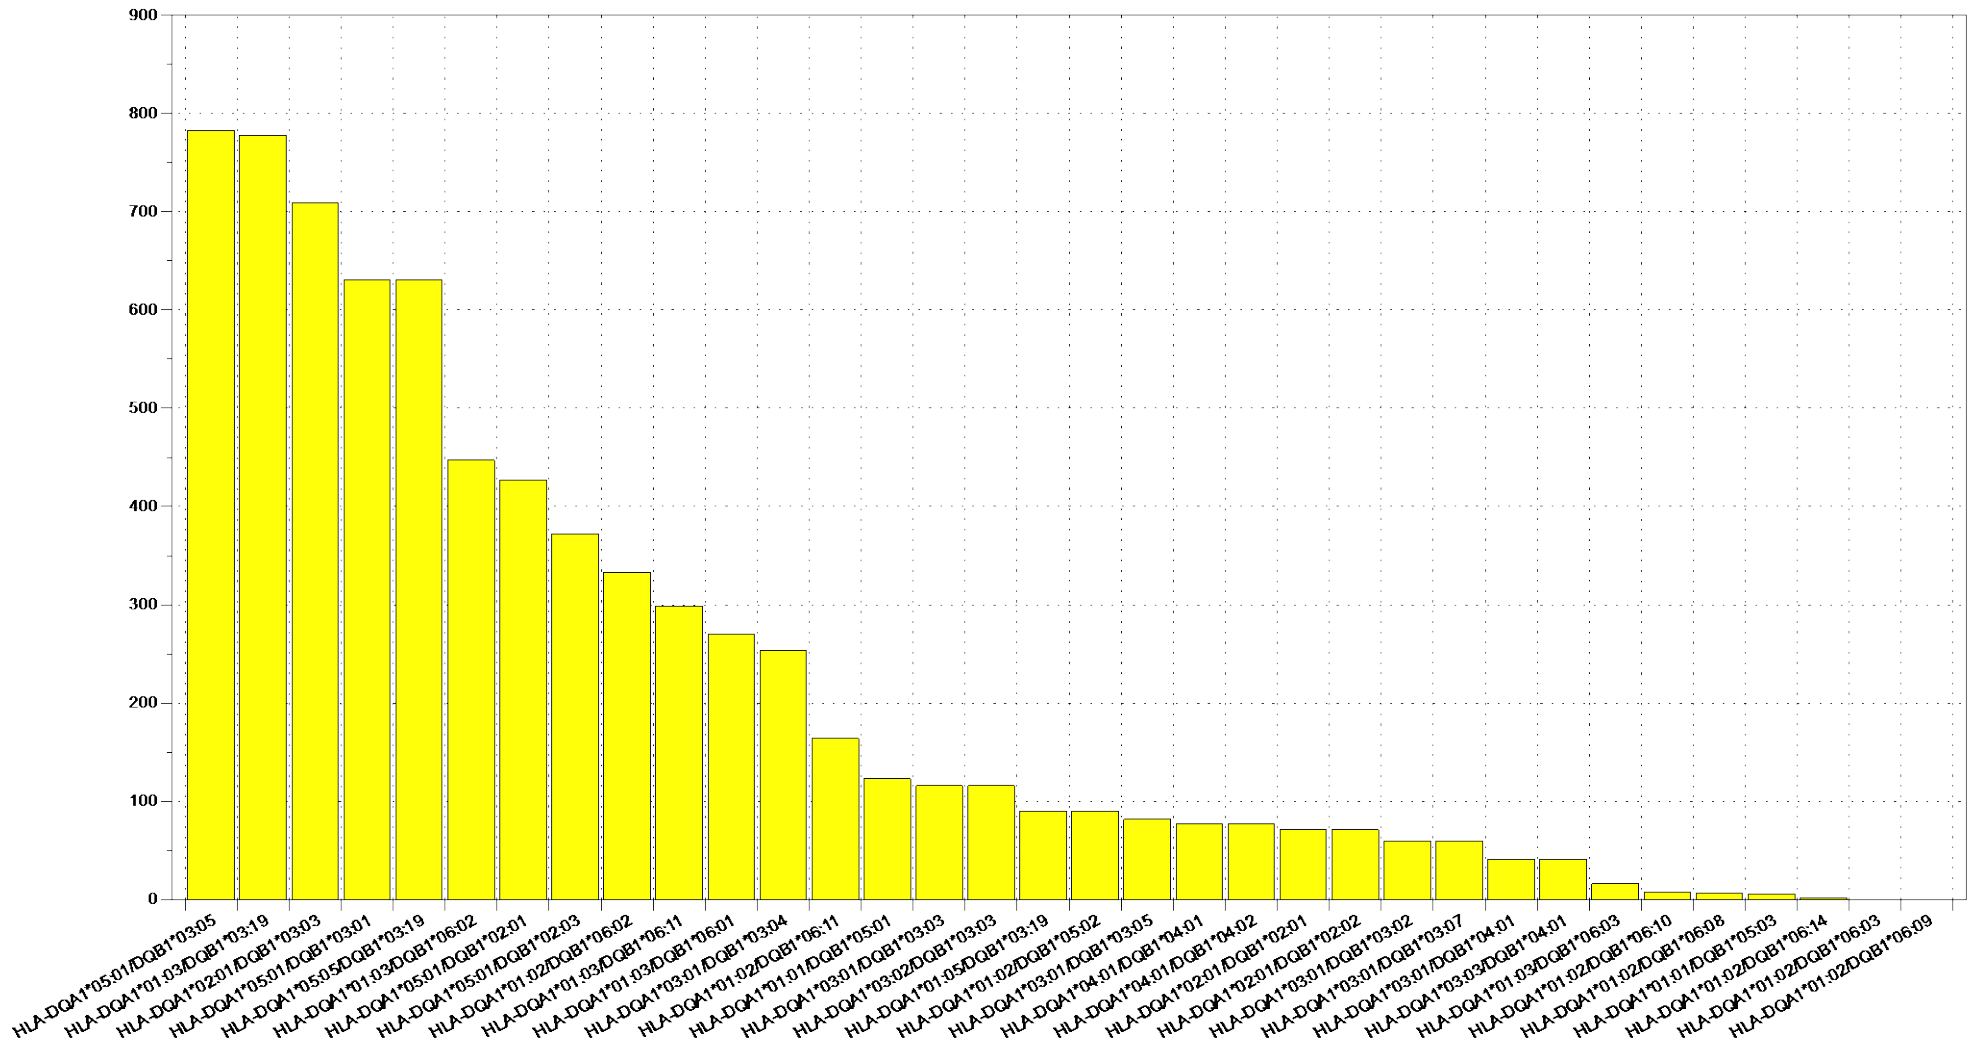

Allele combinations are ordered on the x-axis by their regular (50 nM < IC<sub>50</sub> ≤ 1000 nM) binding prediction and the number of peptides presented are displayed on the y-axis.

## HLA-DQA1/-DQB1 alleles ordered by number of presented peptides with weak binding prediction

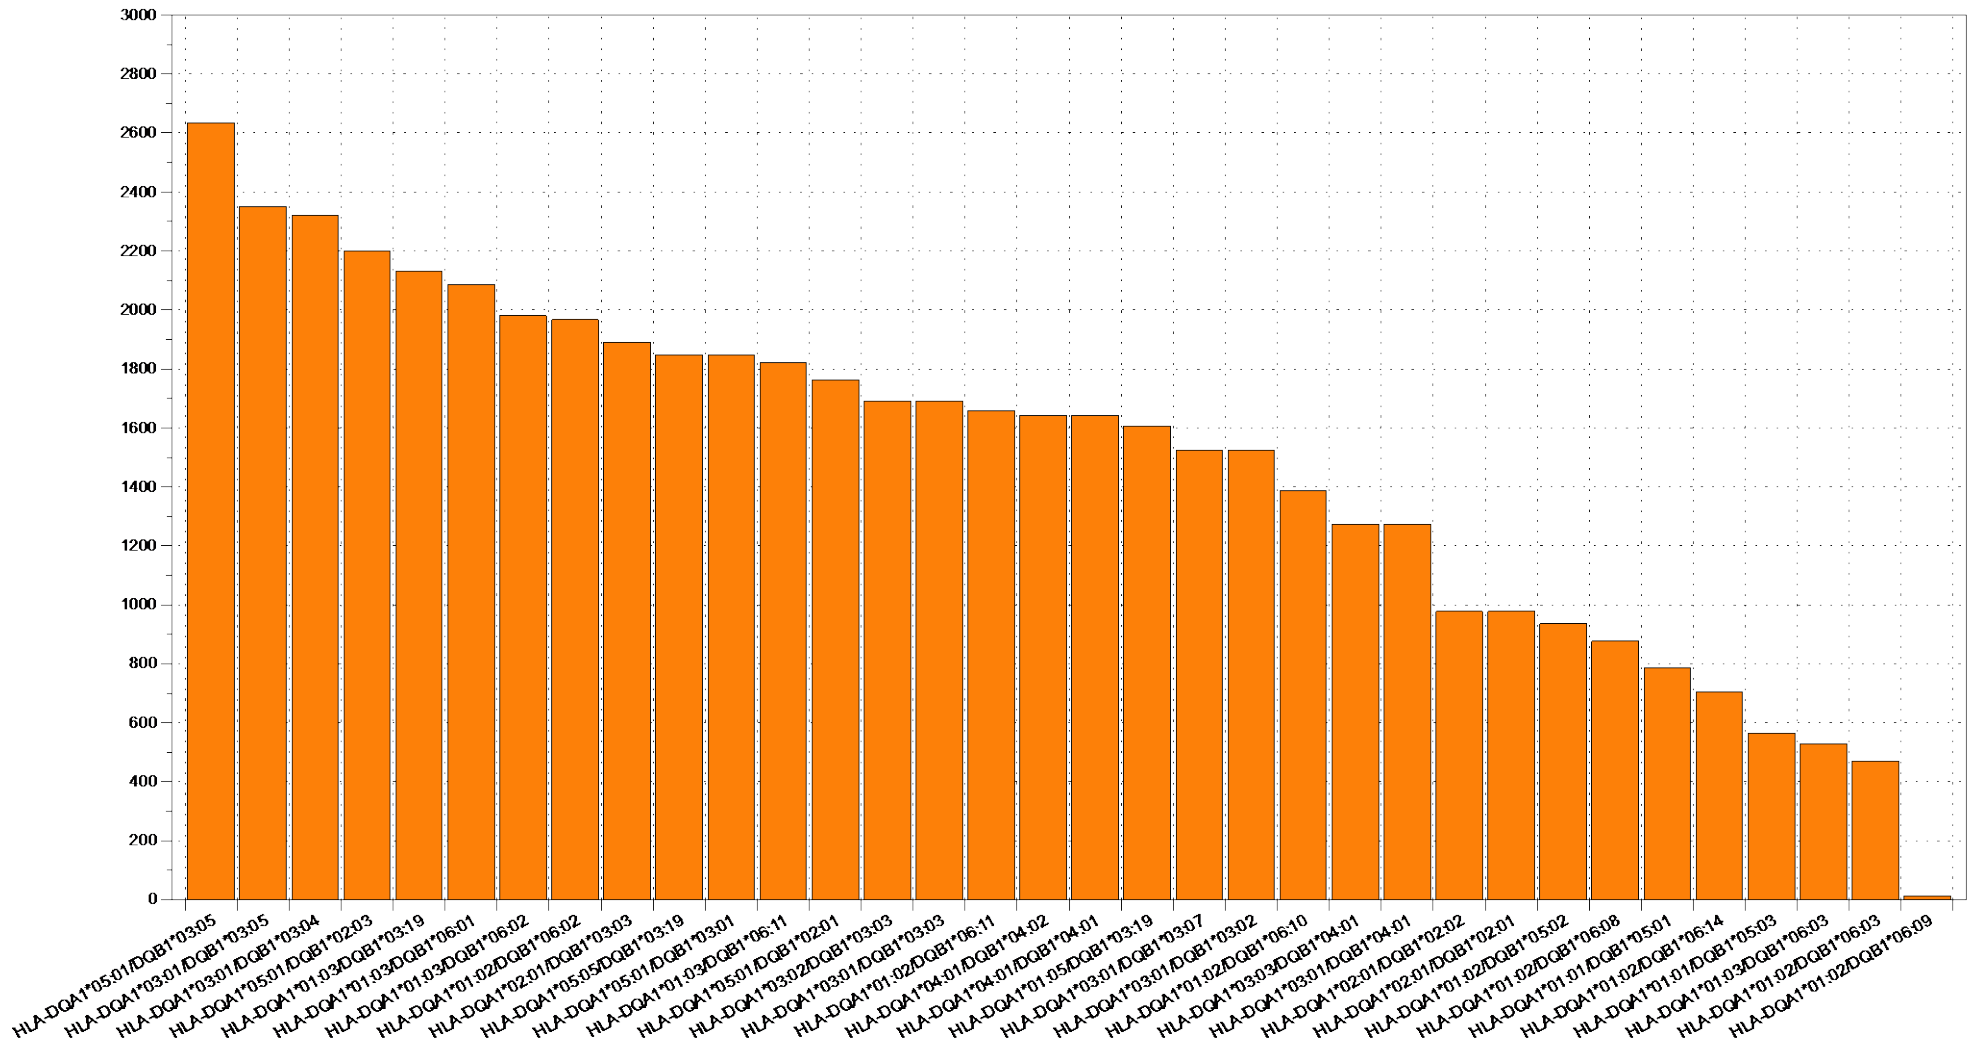

Allele combinations are ordered on the x-axis by their weak ( $1000 \text{ nM} < IC_{50} \leq 5000 \text{ nM}$ ) binding prediction and the number of peptides presented are displayed on the y-axis.
