# Supplementary material
Source: PubMed Central journal article supplement (PMC7300650)
Supplement: TAN-96-277-s002.pdf [file TAN-96-277-s002.pdf]

# Binding affinities of 438 HLA Class I and II proteins to the complete proteomes of seven (potentially) pandemic viruses and distributions of strongest and weakest HLA peptide binders in human populations worldwide

## Supplementary material 6

### Extended results for the binding predictions for A/H7N9

#### Table of Contents

|                                                                                                            |    |
|------------------------------------------------------------------------------------------------------------|----|
| TOTAL NUMBER OF PEPTIDES WITH STRONG, REGULAR AND WEAK BINDING PREDICTIONS FOR <i>HLA-A</i> .....          | 2  |
| GENERAL BINDING PREDICTION TENDENCIES FOR <i>HLA-A</i> .....                                               | 4  |
| <i>HLA-A</i> ALLELES ORDERED BY NUMBER OF PRESENTED PEPTIDES WITH STRONG BINDING PREDICTION .....          | 5  |
| <i>HLA-A</i> ALLELES ORDERED BY NUMBER OF PRESENTED PEPTIDES WITH REGULAR BINDING PREDICTION.....          | 6  |
| <i>HLA-A</i> ALLELES ORDERED BY NUMBER OF PRESENTED PEPTIDES WITH WEAK BINDING PREDICTION.....             | 7  |
| TOTAL NUMBER OF PEPTIDES WITH STRONG, REGULAR AND WEAK BINDING PREDICTIONS FOR <i>HLA-B</i> .....          | 8  |
| GENERAL BINDING PREDICTION TENDENCIES FOR <i>HLA-B</i> .....                                               | 11 |
| <i>HLA-B</i> ALLELES ORDERED BY NUMBER OF PRESENTED PEPTIDES WITH STRONG BINDING PREDICTION .....          | 12 |
| <i>HLA-B</i> ALLELES ORDERED BY NUMBER OF PRESENTED PEPTIDES WITH REGULAR BINDING PREDICTION.....          | 13 |
| <i>HLA-B</i> ALLELES ORDERED BY NUMBER OF PRESENTED PEPTIDES WITH WEAK BINDING PREDICTION.....             | 14 |
| TOTAL NUMBER OF PEPTIDES WITH STRONG, REGULAR AND WEAK BINDING PREDICTIONS FOR <i>HLA-C</i> .....          | 15 |
| GENERAL BINDING PREDICTION TENDENCIES FOR <i>HLA-C</i> .....                                               | 16 |
| <i>HLA-C</i> ALLELES ORDERED BY NUMBER OF PRESENTED PEPTIDES WITH STRONG BINDING PREDICTION .....          | 17 |
| <i>HLA-C</i> ALLELES ORDERED BY NUMBER OF PRESENTED PEPTIDES WITH REGULAR BINDING PREDICTION.....          | 18 |
| <i>HLA-C</i> ALLELES ORDERED BY NUMBER OF PRESENTED PEPTIDES WITH WEAK BINDING PREDICTION .....            | 19 |
| TOTAL NUMBER OF PEPTIDES WITH STRONG, REGULAR AND WEAK BINDING PREDICTIONS FOR <i>HLA-DRB1</i> .....       | 20 |
| GENERAL BINDING PREDICTION TENDENCIES FOR <i>HLA-DRB1</i> .....                                            | 22 |
| <i>HLA-DRB1</i> ALLELES ORDERED BY NUMBER OF PRESENTED PEPTIDES WITH STRONG BINDING PREDICTION .....       | 23 |
| <i>HLA-DRB1</i> ALLELES ORDERED BY NUMBER OF PRESENTED PEPTIDES WITH REGULAR BINDING PREDICTION .....      | 24 |
| <i>HLA-DRB1</i> ALLELES ORDERED BY NUMBER OF PRESENTED PEPTIDES WITH WEAK BINDING PREDICTION .....         | 25 |
| TOTAL NUMBER OF PEPTIDES WITH STRONG, REGULAR AND WEAK BINDING PREDICTIONS FOR <i>HLA-DQA1/-DQB1</i> ....  | 26 |
| GENERAL BINDING PREDICTION TENDENCIES FOR <i>HLA-DQA1/-DQB1</i> .....                                      | 27 |
| <i>HLA-DQA1/-DQB1</i> ALLELES ORDERED BY NUMBER OF PRESENTED PEPTIDES WITH STRONG BINDING PREDICTION ..... | 28 |
| <i>HLA-DQA1/-DQB1</i> ALLELES ORDERED BY NUMBER OF PRESENTED PEPTIDES WITH REGULAR BINDING PREDICTION....  | 29 |
| <i>HLA-DQA1/-DQB1</i> ALLELES ORDERED BY NUMBER OF PRESENTED PEPTIDES WITH WEAK BINDING PREDICTION .....   | 30 |

## Total number of peptides with strong, regular and weak binding predictions for *HLA-A*

|             | <b>IC<sub>50</sub> ≤ 50 nM</b><br>Strong binders | <b>50 nM &lt; IC<sub>50</sub> ≤ 500 nM</b><br>Regular binders | <b>500 nM &lt; IC<sub>50</sub> ≤ 5000 nM</b><br>Weak binders | <b>IC<sub>50</sub> &gt; 5000 nM</b><br>Non binders |
|-------------|--------------------------------------------------|---------------------------------------------------------------|--------------------------------------------------------------|----------------------------------------------------|
| HLA-A*01:01 | 2                                                | 10                                                            | 60                                                           | 4379                                               |
| HLA-A*01:02 | 1                                                | 8                                                             | 96                                                           | 4346                                               |
| HLA-A*01:03 | 2                                                | 9                                                             | 54                                                           | 4386                                               |
| HLA-A*01:06 | 2                                                | 8                                                             | 70                                                           | 4371                                               |
| HLA-A*02:01 | 38                                               | 98                                                            | 234                                                          | 4081                                               |
| HLA-A*02:02 | 60                                               | 157                                                           | 405                                                          | 3829                                               |
| HLA-A*02:03 | 70                                               | 159                                                           | 375                                                          | 3847                                               |
| HLA-A*02:04 | 10                                               | 41                                                            | 182                                                          | 4218                                               |
| HLA-A*02:05 | 27                                               | 156                                                           | 505                                                          | 3763                                               |
| HLA-A*02:06 | 57                                               | 159                                                           | 449                                                          | 3786                                               |
| HLA-A*02:07 | 1                                                | 9                                                             | 65                                                           | 4376                                               |
| HLA-A*02:08 | 13                                               | 121                                                           | 518                                                          | 3799                                               |
| HLA-A*02:09 | 38                                               | 98                                                            | 234                                                          | 4081                                               |
| HLA-A*02:10 | 13                                               | 59                                                            | 294                                                          | 4085                                               |
| HLA-A*02:11 | 129                                              | 156                                                           | 374                                                          | 3792                                               |
| HLA-A*02:12 | 54                                               | 97                                                            | 231                                                          | 4069                                               |
| HLA-A*02:14 | 33                                               | 125                                                           | 429                                                          | 3864                                               |
| HLA-A*02:17 | 4                                                | 30                                                            | 141                                                          | 4276                                               |
| HLA-A*02:19 | 20                                               | 73                                                            | 171                                                          | 4187                                               |
| HLA-A*02:20 | 23                                               | 72                                                            | 252                                                          | 4104                                               |
| HLA-A*02:22 | 84                                               | 172                                                           | 409                                                          | 3786                                               |
| HLA-A*02:24 | 38                                               | 98                                                            | 234                                                          | 4081                                               |
| HLA-A*02:26 | 30                                               | 118                                                           | 243                                                          | 4060                                               |
| HLA-A*02:34 | 23                                               | 82                                                            | 231                                                          | 4115                                               |
| HLA-A*02:35 | 37                                               | 122                                                           | 331                                                          | 3961                                               |
| HLA-A*02:36 | 22                                               | 57                                                            | 198                                                          | 4174                                               |
| HLA-A*02:40 | 38                                               | 98                                                            | 234                                                          | 4081                                               |
| HLA-A*03:01 | 15                                               | 49                                                            | 165                                                          | 4222                                               |
| HLA-A*03:02 | 13                                               | 75                                                            | 187                                                          | 4176                                               |
| HLA-A*03:05 | 15                                               | 49                                                            | 165                                                          | 4222                                               |
| HLA-A*03:08 | 3                                                | 47                                                            | 154                                                          | 4247                                               |
| HLA-A*11:01 | 24                                               | 99                                                            | 187                                                          | 4141                                               |
| HLA-A*11:02 | 24                                               | 99                                                            | 187                                                          | 4141                                               |
| HLA-A*11:03 | 24                                               | 89                                                            | 234                                                          | 4104                                               |
| HLA-A*11:04 | 20                                               | 96                                                            | 196                                                          | 4139                                               |
| HLA-A*11:06 | 11                                               | 85                                                            | 209                                                          | 4146                                               |
| HLA-A*11:12 | 24                                               | 99                                                            | 187                                                          | 4141                                               |
| HLA-A*23:01 | 16                                               | 39                                                            | 171                                                          | 4225                                               |
| HLA-A*23:03 | 16                                               | 39                                                            | 171                                                          | 4225                                               |
| HLA-A*23:04 | 33                                               | 99                                                            | 257                                                          | 4062                                               |
| HLA-A*24:02 | 9                                                | 34                                                            | 113                                                          | 4295                                               |
| HLA-A*24:03 | 35                                               | 77                                                            | 206                                                          | 4133                                               |
| HLA-A*24:04 | 2                                                | 17                                                            | 122                                                          | 4310                                               |
| HLA-A*24:05 | 9                                                | 34                                                            | 113                                                          | 4295                                               |
| HLA-A*24:06 | 5                                                | 35                                                            | 139                                                          | 4272                                               |
| HLA-A*24:07 | 5                                                | 25                                                            | 107                                                          | 4314                                               |
| HLA-A*24:08 | 3                                                | 25                                                            | 141                                                          | 4282                                               |
| HLA-A*24:10 | 26                                               | 83                                                            | 235                                                          | 4107                                               |
| HLA-A*24:13 | 16                                               | 39                                                            | 171                                                          | 4225                                               |
| HLA-A*24:20 | 9                                                | 34                                                            | 113                                                          | 4295                                               |
| HLA-A*24:21 | 9                                                | 34                                                            | 113                                                          | 4295                                               |
| HLA-A*24:23 | 35                                               | 77                                                            | 206                                                          | 4133                                               |
| HLA-A*25:01 | 0                                                | 7                                                             | 72                                                           | 4372                                               |
| HLA-A*25:02 | 0                                                | 4                                                             | 81                                                           | 4366                                               |
| HLA-A*26:01 | 3                                                | 28                                                            | 98                                                           | 4322                                               |
| HLA-A*26:02 | 33                                               | 78                                                            | 270                                                          | 4070                                               |
| HLA-A*26:03 | 0                                                | 28                                                            | 179                                                          | 4244                                               |
| HLA-A*26:05 | 3                                                | 22                                                            | 103                                                          | 4323                                               |
| HLA-A*26:08 | 3                                                | 35                                                            | 152                                                          | 4261                                               |
| HLA-A*26:12 | 3                                                | 30                                                            | 133                                                          | 4285                                               |
| HLA-A*26:18 | 3                                                | 30                                                            | 133                                                          | 4285                                               |
| HLA-A*29:01 | 17                                               | 47                                                            | 158                                                          | 4229                                               |

|             | <b>IC<sub>50</sub> ≤ 50 nM</b><br><b>Strong binders</b> | <b>50 nM &lt; IC<sub>50</sub> ≤ 500 nM</b><br><b>Regular binders</b> | <b>500 nM &lt; IC<sub>50</sub> ≤ 5000 nM</b><br><b>Weak binders</b> | <b>IC<sub>50</sub> &gt; 5000 nM</b><br><b>Non binders</b> |
|-------------|---------------------------------------------------------|----------------------------------------------------------------------|---------------------------------------------------------------------|-----------------------------------------------------------|
| HLA-A*29:02 | 17                                                      | 47                                                                   | 158                                                                 | 4229                                                      |
| HLA-A*30:01 | 48                                                      | 197                                                                  | 741                                                                 | 3465                                                      |
| HLA-A*30:02 | 9                                                       | 52                                                                   | 207                                                                 | 4183                                                      |
| HLA-A*30:04 | 0                                                       | 28                                                                   | 366                                                                 | 4057                                                      |
| HLA-A*30:08 | 2                                                       | 46                                                                   | 314                                                                 | 4089                                                      |
| HLA-A*31:01 | 57                                                      | 122                                                                  | 267                                                                 | 4005                                                      |
| HLA-A*31:02 | 44                                                      | 128                                                                  | 285                                                                 | 3994                                                      |
| HLA-A*31:04 | 72                                                      | 152                                                                  | 307                                                                 | 3920                                                      |
| HLA-A*31:08 | 17                                                      | 103                                                                  | 385                                                                 | 3946                                                      |
| HLA-A*32:01 | 27                                                      | 73                                                                   | 291                                                                 | 4060                                                      |
| HLA-A*32:02 | 10                                                      | 64                                                                   | 245                                                                 | 4132                                                      |
| HLA-A*32:03 | 7                                                       | 55                                                                   | 219                                                                 | 4170                                                      |
| HLA-A*33:01 | 22                                                      | 79                                                                   | 173                                                                 | 4177                                                      |
| HLA-A*33:03 | 35                                                      | 89                                                                   | 208                                                                 | 4119                                                      |
| HLA-A*34:01 | 3                                                       | 54                                                                   | 389                                                                 | 4005                                                      |
| HLA-A*34:02 | 11                                                      | 83                                                                   | 262                                                                 | 4095                                                      |
| HLA-A*36:01 | 2                                                       | 14                                                                   | 130                                                                 | 4305                                                      |
| HLA-A*43:01 | 0                                                       | 25                                                                   | 135                                                                 | 4291                                                      |
| HLA-A*66:01 | 1                                                       | 35                                                                   | 218                                                                 | 4197                                                      |
| HLA-A*66:02 | 3                                                       | 48                                                                   | 343                                                                 | 4057                                                      |
| HLA-A*66:03 | 1                                                       | 34                                                                   | 273                                                                 | 4143                                                      |
| HLA-A*68:01 | 58                                                      | 117                                                                  | 301                                                                 | 3975                                                      |
| HLA-A*68:02 | 32                                                      | 102                                                                  | 356                                                                 | 3961                                                      |
| HLA-A*68:03 | 31                                                      | 99                                                                   | 265                                                                 | 4056                                                      |
| HLA-A*68:06 | 4                                                       | 34                                                                   | 323                                                                 | 4090                                                      |
| HLA-A*68:12 | 58                                                      | 117                                                                  | 301                                                                 | 3975                                                      |
| HLA-A*69:01 | 19                                                      | 72                                                                   | 312                                                                 | 4048                                                      |
| HLA-A*74:01 | 3                                                       | 32                                                                   | 139                                                                 | 4277                                                      |
| HLA-A*74:03 | 3                                                       | 32                                                                   | 139                                                                 | 4277                                                      |
| HLA-A*80:01 | 4                                                       | 11                                                                   | 66                                                                  | 4370                                                      |

Alleles are ordered alphabetically.

## General binding prediction tendencies for *HLA-A*

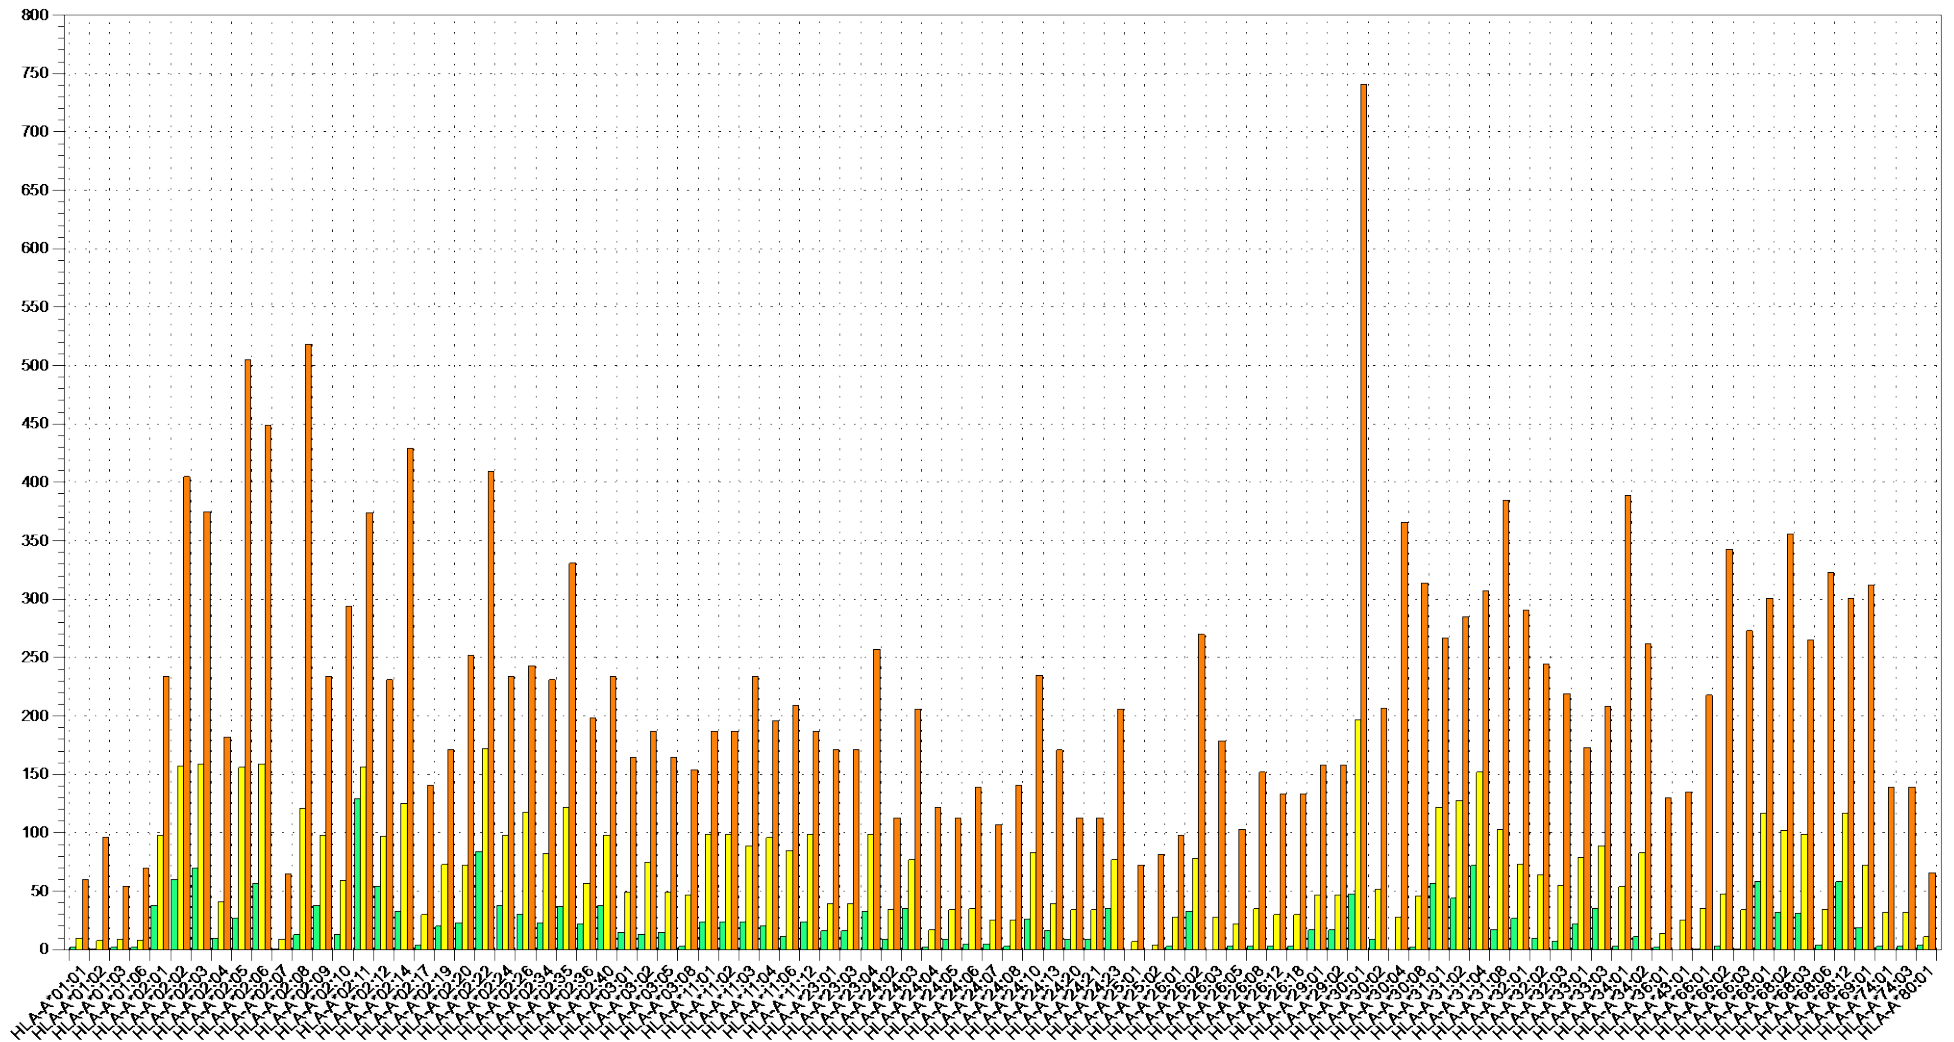

Alleles are ordered alphabetically on the x-axis, while the number of peptides binding with strong ( $IC_{50} \leq 50$  nM), regular ( $50$  nM  $< IC_{50} \leq 500$  nM) and weak ( $500$  nM  $< IC_{50} \leq 5000$  nM) binding prediction are displayed on the y-axis.





## HLA-A alleles ordered by number of presented peptides with weak binding prediction

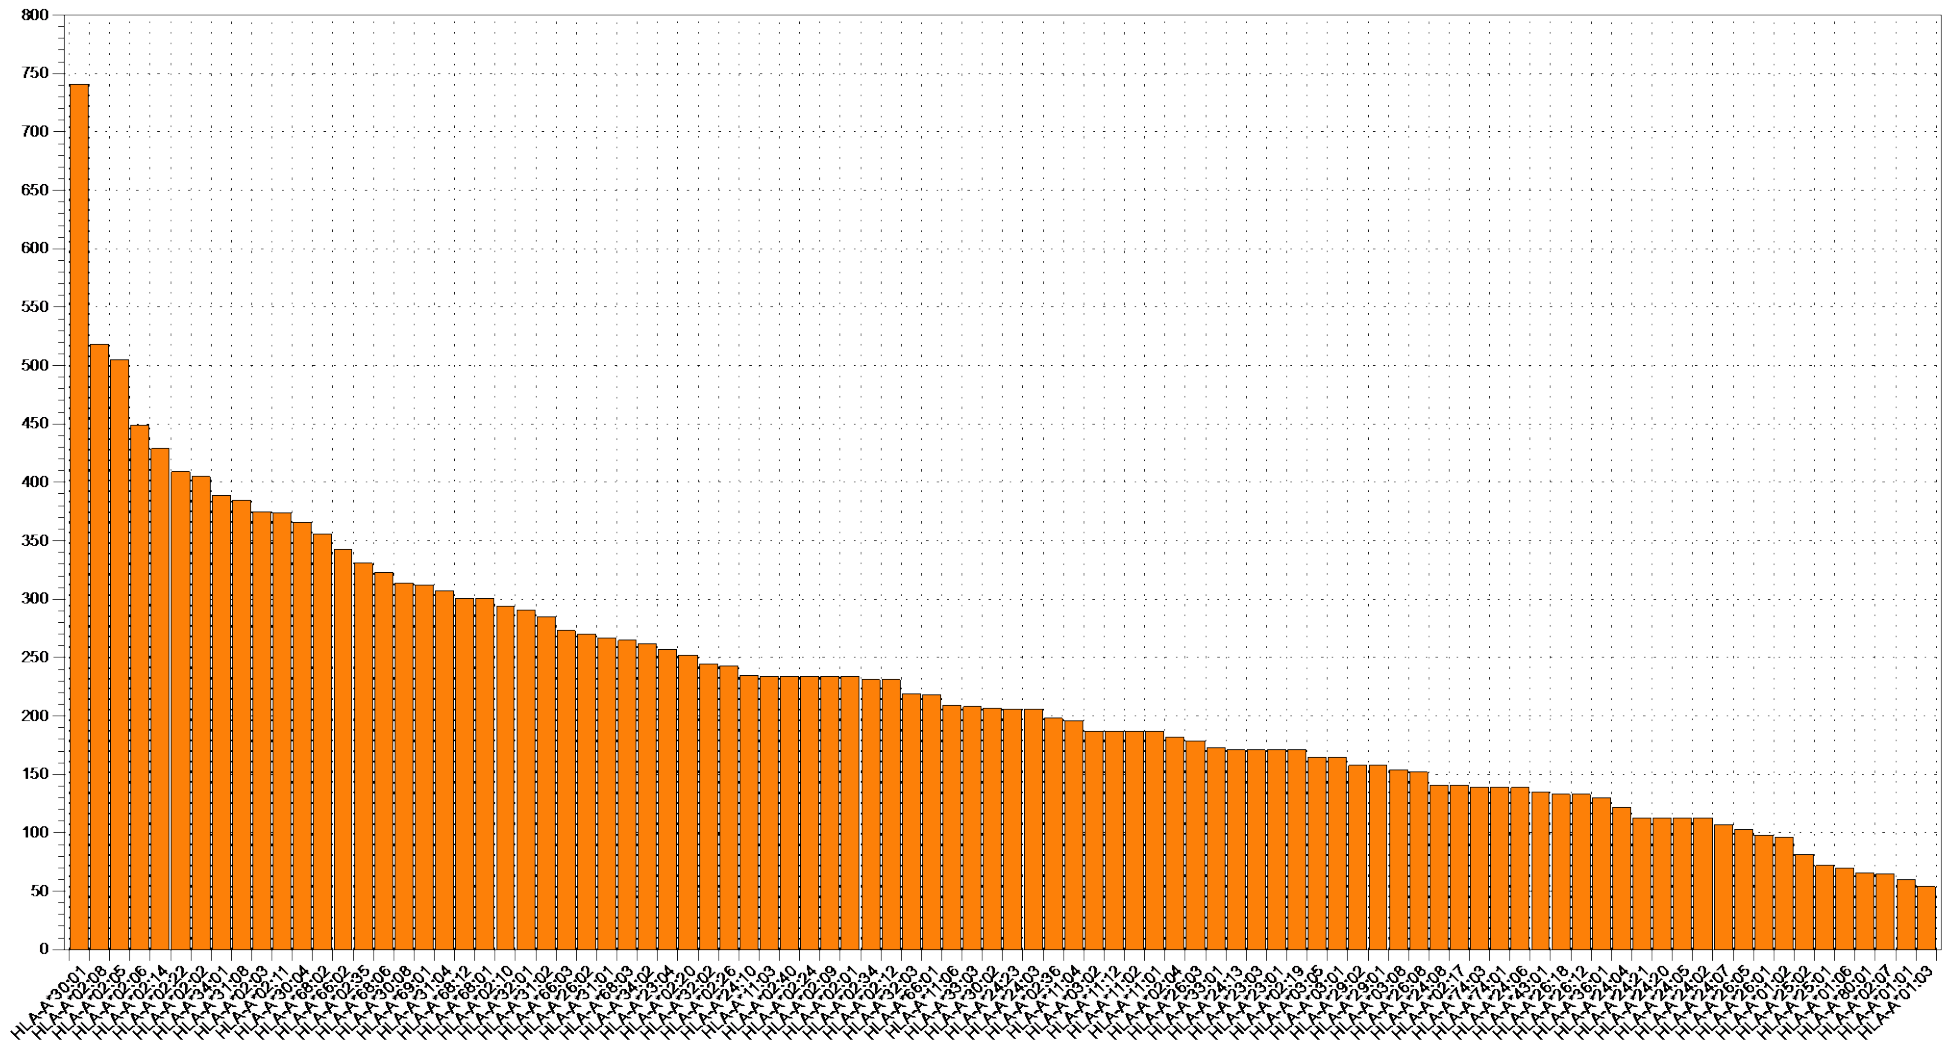

## Total number of peptides with strong, regular and weak binding predictions for *HLA-B*

|             | <b>IC<sub>50</sub> ≤ 50 nM</b><br>Strong binders | <b>50 nM &lt; IC<sub>50</sub> ≤ 500 nM</b><br>Regular binders | <b>500 nM &lt; IC<sub>50</sub> ≤ 5000 nM</b><br>Weak binders | <b>IC<sub>50</sub> &gt; 5000 nM</b><br>Non binders |
|-------------|--------------------------------------------------|---------------------------------------------------------------|--------------------------------------------------------------|----------------------------------------------------|
| HLA-B*07:02 | 7                                                | 42                                                            | 163                                                          | 4239                                               |
| HLA-B*07:04 | 5                                                | 43                                                            | 200                                                          | 4203                                               |
| HLA-B*07:05 | 10                                               | 46                                                            | 204                                                          | 4191                                               |
| HLA-B*07:06 | 10                                               | 46                                                            | 204                                                          | 4191                                               |
| HLA-B*08:01 | 13                                               | 56                                                            | 287                                                          | 4095                                               |
| HLA-B*08:03 | 0                                                | 2                                                             | 31                                                           | 4418                                               |
| HLA-B*08:04 | 1                                                | 37                                                            | 270                                                          | 4143                                               |
| HLA-B*08:05 | 3                                                | 34                                                            | 231                                                          | 4183                                               |
| HLA-B*13:01 | 2                                                | 53                                                            | 357                                                          | 4039                                               |
| HLA-B*13:02 | 0                                                | 10                                                            | 177                                                          | 4264                                               |
| HLA-B*13:03 | 0                                                | 9                                                             | 203                                                          | 4239                                               |
| HLA-B*13:04 | 0                                                | 20                                                            | 317                                                          | 4114                                               |
| HLA-B*14:01 | 0                                                | 10                                                            | 134                                                          | 4307                                               |
| HLA-B*14:02 | 0                                                | 10                                                            | 134                                                          | 4307                                               |
| HLA-B*14:03 | 0                                                | 7                                                             | 138                                                          | 4306                                               |
| HLA-B*15:01 | 28                                               | 99                                                            | 336                                                          | 3988                                               |
| HLA-B*15:02 | 12                                               | 73                                                            | 278                                                          | 4088                                               |
| HLA-B*15:03 | 107                                              | 244                                                           | 658                                                          | 3442                                               |
| HLA-B*15:04 | 0                                                | 19                                                            | 354                                                          | 4078                                               |
| HLA-B*15:05 | 16                                               | 113                                                           | 395                                                          | 3927                                               |
| HLA-B*15:06 | 28                                               | 113                                                           | 338                                                          | 3972                                               |
| HLA-B*15:07 | 8                                                | 97                                                            | 324                                                          | 4022                                               |
| HLA-B*15:08 | 3                                                | 29                                                            | 162                                                          | 4257                                               |
| HLA-B*15:09 | 0                                                | 5                                                             | 62                                                           | 4384                                               |
| HLA-B*15:10 | 0                                                | 5                                                             | 57                                                           | 4389                                               |
| HLA-B*15:11 | 3                                                | 29                                                            | 163                                                          | 4256                                               |
| HLA-B*15:12 | 3                                                | 35                                                            | 232                                                          | 4181                                               |
| HLA-B*15:13 | 0                                                | 19                                                            | 278                                                          | 4154                                               |
| HLA-B*15:15 | 6                                                | 57                                                            | 264                                                          | 4124                                               |
| HLA-B*15:16 | 18                                               | 136                                                           | 337                                                          | 3960                                               |
| HLA-B*15:17 | 97                                               | 145                                                           | 316                                                          | 3893                                               |
| HLA-B*15:18 | 1                                                | 20                                                            | 198                                                          | 4232                                               |
| HLA-B*15:20 | 17                                               | 111                                                           | 388                                                          | 3935                                               |
| HLA-B*15:21 | 2                                                | 11                                                            | 136                                                          | 4302                                               |
| HLA-B*15:24 | 0                                                | 34                                                            | 319                                                          | 4098                                               |
| HLA-B*15:25 | 46                                               | 129                                                           | 380                                                          | 3896                                               |
| HLA-B*15:27 | 12                                               | 85                                                            | 269                                                          | 4085                                               |
| HLA-B*15:29 | 34                                               | 134                                                           | 489                                                          | 3794                                               |
| HLA-B*15:31 | 6                                                | 82                                                            | 286                                                          | 4077                                               |
| HLA-B*15:32 | 18                                               | 128                                                           | 402                                                          | 3903                                               |
| HLA-B*15:34 | 28                                               | 99                                                            | 336                                                          | 3988                                               |
| HLA-B*15:35 | 6                                                | 88                                                            | 293                                                          | 4064                                               |
| HLA-B*15:38 | 15                                               | 102                                                           | 360                                                          | 3974                                               |
| HLA-B*15:39 | 47                                               | 136                                                           | 396                                                          | 3872                                               |
| HLA-B*15:40 | 5                                                | 72                                                            | 282                                                          | 4092                                               |
| HLA-B*15:58 | 0                                                | 9                                                             | 188                                                          | 4254                                               |
| HLA-B*18:01 | 7                                                | 33                                                            | 144                                                          | 4267                                               |
| HLA-B*18:02 | 4                                                | 39                                                            | 203                                                          | 4205                                               |
| HLA-B*18:03 | 2                                                | 33                                                            | 185                                                          | 4231                                               |
| HLA-B*18:05 | 7                                                | 33                                                            | 144                                                          | 4267                                               |
| HLA-B*18:07 | 2                                                | 18                                                            | 170                                                          | 4261                                               |
| HLA-B*27:02 | 0                                                | 18                                                            | 69                                                           | 4364                                               |
| HLA-B*27:03 | 0                                                | 11                                                            | 55                                                           | 4385                                               |
| HLA-B*27:04 | 2                                                | 21                                                            | 95                                                           | 4333                                               |
| HLA-B*27:05 | 17                                               | 65                                                            | 182                                                          | 4187                                               |
| HLA-B*27:06 | 22                                               | 46                                                            | 182                                                          | 4201                                               |
| HLA-B*27:07 | 33                                               | 54                                                            | 274                                                          | 4090                                               |
| HLA-B*27:08 | 16                                               | 46                                                            | 194                                                          | 4195                                               |
| HLA-B*27:09 | 23                                               | 51                                                            | 204                                                          | 4173                                               |
| HLA-B*27:12 | 14                                               | 63                                                            | 265                                                          | 4109                                               |
| HLA-B*27:14 | 0                                                | 24                                                            | 135                                                          | 4292                                               |
| HLA-B*35:01 | 26                                               | 62                                                            | 255                                                          | 4108                                               |



|             | IC <sub>50</sub> ≤ 50 nM<br>Strong binders | 50 nM < IC <sub>50</sub> ≤ 500 nM<br>Regular binders | 500 nM < IC <sub>50</sub> ≤ 5000 nM<br>Weak binders | IC <sub>50</sub> > 5000 nM<br>Non binders |
|-------------|--------------------------------------------|------------------------------------------------------|-----------------------------------------------------|-------------------------------------------|
| HLA-B*35:02 | 2                                          | 10                                                   | 90                                                  | 4349                                      |
| HLA-B*35:03 | 0                                          | 8                                                    | 48                                                  | 4395                                      |
| HLA-B*35:04 | 2                                          | 10                                                   | 90                                                  | 4349                                      |
| HLA-B*35:05 | 16                                         | 74                                                   | 325                                                 | 4036                                      |
| HLA-B*35:06 | 0                                          | 7                                                    | 36                                                  | 4408                                      |
| HLA-B*35:08 | 7                                          | 28                                                   | 132                                                 | 4284                                      |
| HLA-B*35:09 | 2                                          | 10                                                   | 90                                                  | 4349                                      |
| HLA-B*35:10 | 59                                         | 158                                                  | 480                                                 | 3754                                      |
| HLA-B*35:11 | 24                                         | 89                                                   | 349                                                 | 3989                                      |
| HLA-B*35:12 | 2                                          | 10                                                   | 90                                                  | 4349                                      |
| HLA-B*35:17 | 14                                         | 66                                                   | 274                                                 | 4097                                      |
| HLA-B*35:19 | 28                                         | 88                                                   | 344                                                 | 3991                                      |
| HLA-B*35:20 | 7                                          | 87                                                   | 315                                                 | 4042                                      |
| HLA-B*35:21 | 15                                         | 82                                                   | 321                                                 | 4033                                      |
| HLA-B*35:32 | 25                                         | 70                                                   | 290                                                 | 4066                                      |
| HLA-B*35:43 | 11                                         | 66                                                   | 278                                                 | 4096                                      |
| HLA-B*37:01 | 0                                          | 10                                                   | 127                                                 | 4314                                      |
| HLA-B*38:01 | 1                                          | 7                                                    | 109                                                 | 4334                                      |
| HLA-B*38:02 | 1                                          | 8                                                    | 111                                                 | 4331                                      |
| HLA-B*39:01 | 12                                         | 50                                                   | 192                                                 | 4197                                      |
| HLA-B*39:02 | 26                                         | 107                                                  | 501                                                 | 3817                                      |
| HLA-B*39:03 | 11                                         | 55                                                   | 219                                                 | 4166                                      |
| HLA-B*39:04 | 12                                         | 50                                                   | 192                                                 | 4197                                      |
| HLA-B*39:05 | 2                                          | 16                                                   | 93                                                  | 4340                                      |
| HLA-B*39:06 | 3                                          | 18                                                   | 140                                                 | 4290                                      |
| HLA-B*39:07 | 5                                          | 48                                                   | 288                                                 | 4110                                      |
| HLA-B*39:09 | 11                                         | 41                                                   | 244                                                 | 4155                                      |
| HLA-B*39:10 | 7                                          | 51                                                   | 297                                                 | 4096                                      |
| HLA-B*39:15 | 9                                          | 44                                                   | 177                                                 | 4221                                      |
| HLA-B*39:24 | 11                                         | 55                                                   | 219                                                 | 4166                                      |
| HLA-B*40:01 | 14                                         | 29                                                   | 106                                                 | 4302                                      |
| HLA-B*40:02 | 16                                         | 57                                                   | 196                                                 | 4182                                      |
| HLA-B*40:03 | 5                                          | 50                                                   | 233                                                 | 4163                                      |
| HLA-B*40:04 | 17                                         | 52                                                   | 164                                                 | 4218                                      |
| HLA-B*40:05 | 6                                          | 58                                                   | 242                                                 | 4145                                      |
| HLA-B*40:06 | 0                                          | 31                                                   | 111                                                 | 4309                                      |
| HLA-B*40:09 | 9                                          | 54                                                   | 173                                                 | 4215                                      |
| HLA-B*40:10 | 1                                          | 19                                                   | 86                                                  | 4345                                      |
| HLA-B*40:11 | 18                                         | 51                                                   | 168                                                 | 4214                                      |
| HLA-B*40:12 | 0                                          | 14                                                   | 84                                                  | 4353                                      |
| HLA-B*40:14 | 18                                         | 51                                                   | 168                                                 | 4214                                      |
| HLA-B*40:16 | 6                                          | 42                                                   | 203                                                 | 4200                                      |
| HLA-B*40:40 | 6                                          | 48                                                   | 234                                                 | 4163                                      |
| HLA-B*41:01 | 8                                          | 47                                                   | 149                                                 | 4247                                      |
| HLA-B*41:02 | 16                                         | 58                                                   | 227                                                 | 4150                                      |
| HLA-B*42:01 | 15                                         | 64                                                   | 308                                                 | 4064                                      |
| HLA-B*42:02 | 0                                          | 32                                                   | 214                                                 | 4205                                      |
| HLA-B*44:02 | 8                                          | 26                                                   | 96                                                  | 4321                                      |
| HLA-B*44:03 | 8                                          | 27                                                   | 100                                                 | 4316                                      |
| HLA-B*44:04 | 3                                          | 18                                                   | 76                                                  | 4354                                      |
| HLA-B*44:05 | 0                                          | 17                                                   | 68                                                  | 4366                                      |
| HLA-B*44:06 | 0                                          | 1                                                    | 37                                                  | 4413                                      |
| HLA-B*44:07 | 8                                          | 27                                                   | 100                                                 | 4316                                      |
| HLA-B*44:09 | 8                                          | 47                                                   | 201                                                 | 4195                                      |
| HLA-B*44:15 | 0                                          | 12                                                   | 82                                                  | 4357                                      |
| HLA-B*45:01 | 1                                          | 38                                                   | 125                                                 | 4287                                      |
| HLA-B*46:01 | 0                                          | 2                                                    | 45                                                  | 4404                                      |
| HLA-B*47:01 | 0                                          | 27                                                   | 285                                                 | 4139                                      |
| HLA-B*47:03 | 2                                          | 40                                                   | 242                                                 | 4167                                      |
| HLA-B*48:01 | 0                                          | 8                                                    | 75                                                  | 4368                                      |
| HLA-B*48:02 | 46                                         | 162                                                  | 545                                                 | 3698                                      |
| HLA-B*48:03 | 0                                          | 14                                                   | 84                                                  | 4353                                      |
| HLA-B*48:04 | 0                                          | 8                                                    | 75                                                  | 4368                                      |
| HLA-B*49:01 | 2                                          | 25                                                   | 82                                                  | 4342                                      |
| HLA-B*50:01 | 6                                          | 32                                                   | 153                                                 | 4260                                      |

|             | <b>IC<sub>50</sub> ≤ 50 nM</b><br><b>Strong binders</b> | <b>50 nM &lt; IC<sub>50</sub> ≤ 500 nM</b><br><b>Regular binders</b> | <b>500 nM &lt; IC<sub>50</sub> ≤ 5000 nM</b><br><b>Weak binders</b> | <b>IC<sub>50</sub> &gt; 5000 nM</b><br><b>Non binders</b> |
|-------------|---------------------------------------------------------|----------------------------------------------------------------------|---------------------------------------------------------------------|-----------------------------------------------------------|
| HLA-B*50:02 | 0                                                       | 20                                                                   | 101                                                                 | 4330                                                      |
| HLA-B*51:01 | 0                                                       | 11                                                                   | 42                                                                  | 4398                                                      |
| HLA-B*51:02 | 0                                                       | 11                                                                   | 62                                                                  | 4378                                                      |
| HLA-B*51:04 | 0                                                       | 6                                                                    | 72                                                                  | 4373                                                      |
| HLA-B*51:05 | 0                                                       | 2                                                                    | 22                                                                  | 4427                                                      |
| HLA-B*51:06 | 0                                                       | 9                                                                    | 88                                                                  | 4354                                                      |
| HLA-B*51:07 | 0                                                       | 0                                                                    | 29                                                                  | 4422                                                      |
| HLA-B*51:08 | 0                                                       | 3                                                                    | 40                                                                  | 4408                                                      |
| HLA-B*51:09 | 0                                                       | 4                                                                    | 42                                                                  | 4405                                                      |
| HLA-B*52:01 | 0                                                       | 3                                                                    | 65                                                                  | 4383                                                      |
| HLA-B*53:01 | 5                                                       | 31                                                                   | 153                                                                 | 4262                                                      |
| HLA-B*53:02 | 3                                                       | 21                                                                   | 162                                                                 | 4265                                                      |
| HLA-B*53:03 | 8                                                       | 66                                                                   | 345                                                                 | 4032                                                      |
| HLA-B*53:05 | 5                                                       | 37                                                                   | 148                                                                 | 4261                                                      |
| HLA-B*54:01 | 3                                                       | 18                                                                   | 100                                                                 | 4330                                                      |
| HLA-B*55:01 | 0                                                       | 10                                                                   | 110                                                                 | 4331                                                      |
| HLA-B*55:02 | 1                                                       | 23                                                                   | 150                                                                 | 4277                                                      |
| HLA-B*55:04 | 19                                                      | 63                                                                   | 347                                                                 | 4022                                                      |
| HLA-B*55:07 | 3                                                       | 18                                                                   | 100                                                                 | 4330                                                      |
| HLA-B*55:12 | 1                                                       | 18                                                                   | 146                                                                 | 4286                                                      |
| HLA-B*56:01 | 1                                                       | 18                                                                   | 130                                                                 | 4302                                                      |
| HLA-B*56:02 | 5                                                       | 39                                                                   | 255                                                                 | 4152                                                      |
| HLA-B*56:03 | 7                                                       | 53                                                                   | 380                                                                 | 4011                                                      |
| HLA-B*56:04 | 5                                                       | 39                                                                   | 255                                                                 | 4152                                                      |
| HLA-B*57:01 | 14                                                      | 40                                                                   | 219                                                                 | 4178                                                      |
| HLA-B*57:02 | 7                                                       | 36                                                                   | 168                                                                 | 4240                                                      |
| HLA-B*57:03 | 15                                                      | 65                                                                   | 222                                                                 | 4149                                                      |
| HLA-B*58:01 | 22                                                      | 80                                                                   | 276                                                                 | 4073                                                      |
| HLA-B*58:02 | 0                                                       | 5                                                                    | 28                                                                  | 4418                                                      |
| HLA-B*59:01 | 0                                                       | 8                                                                    | 104                                                                 | 4339                                                      |
| HLA-B*67:01 | 8                                                       | 34                                                                   | 219                                                                 | 4190                                                      |
| HLA-B*73:01 | 0                                                       | 6                                                                    | 72                                                                  | 4373                                                      |
| HLA-B*78:01 | 0                                                       | 5                                                                    | 115                                                                 | 4331                                                      |
| HLA-B*78:02 | 0                                                       | 4                                                                    | 56                                                                  | 4391                                                      |
| HLA-B*81:01 | 1                                                       | 12                                                                   | 80                                                                  | 4358                                                      |
| HLA-B*82:01 | 0                                                       | 1                                                                    | 66                                                                  | 4384                                                      |
| HLA-B*82:02 | 0                                                       | 1                                                                    | 66                                                                  | 4384                                                      |

Alleles are ordered alphabetically.

## General binding prediction tendencies for *HLA-B*

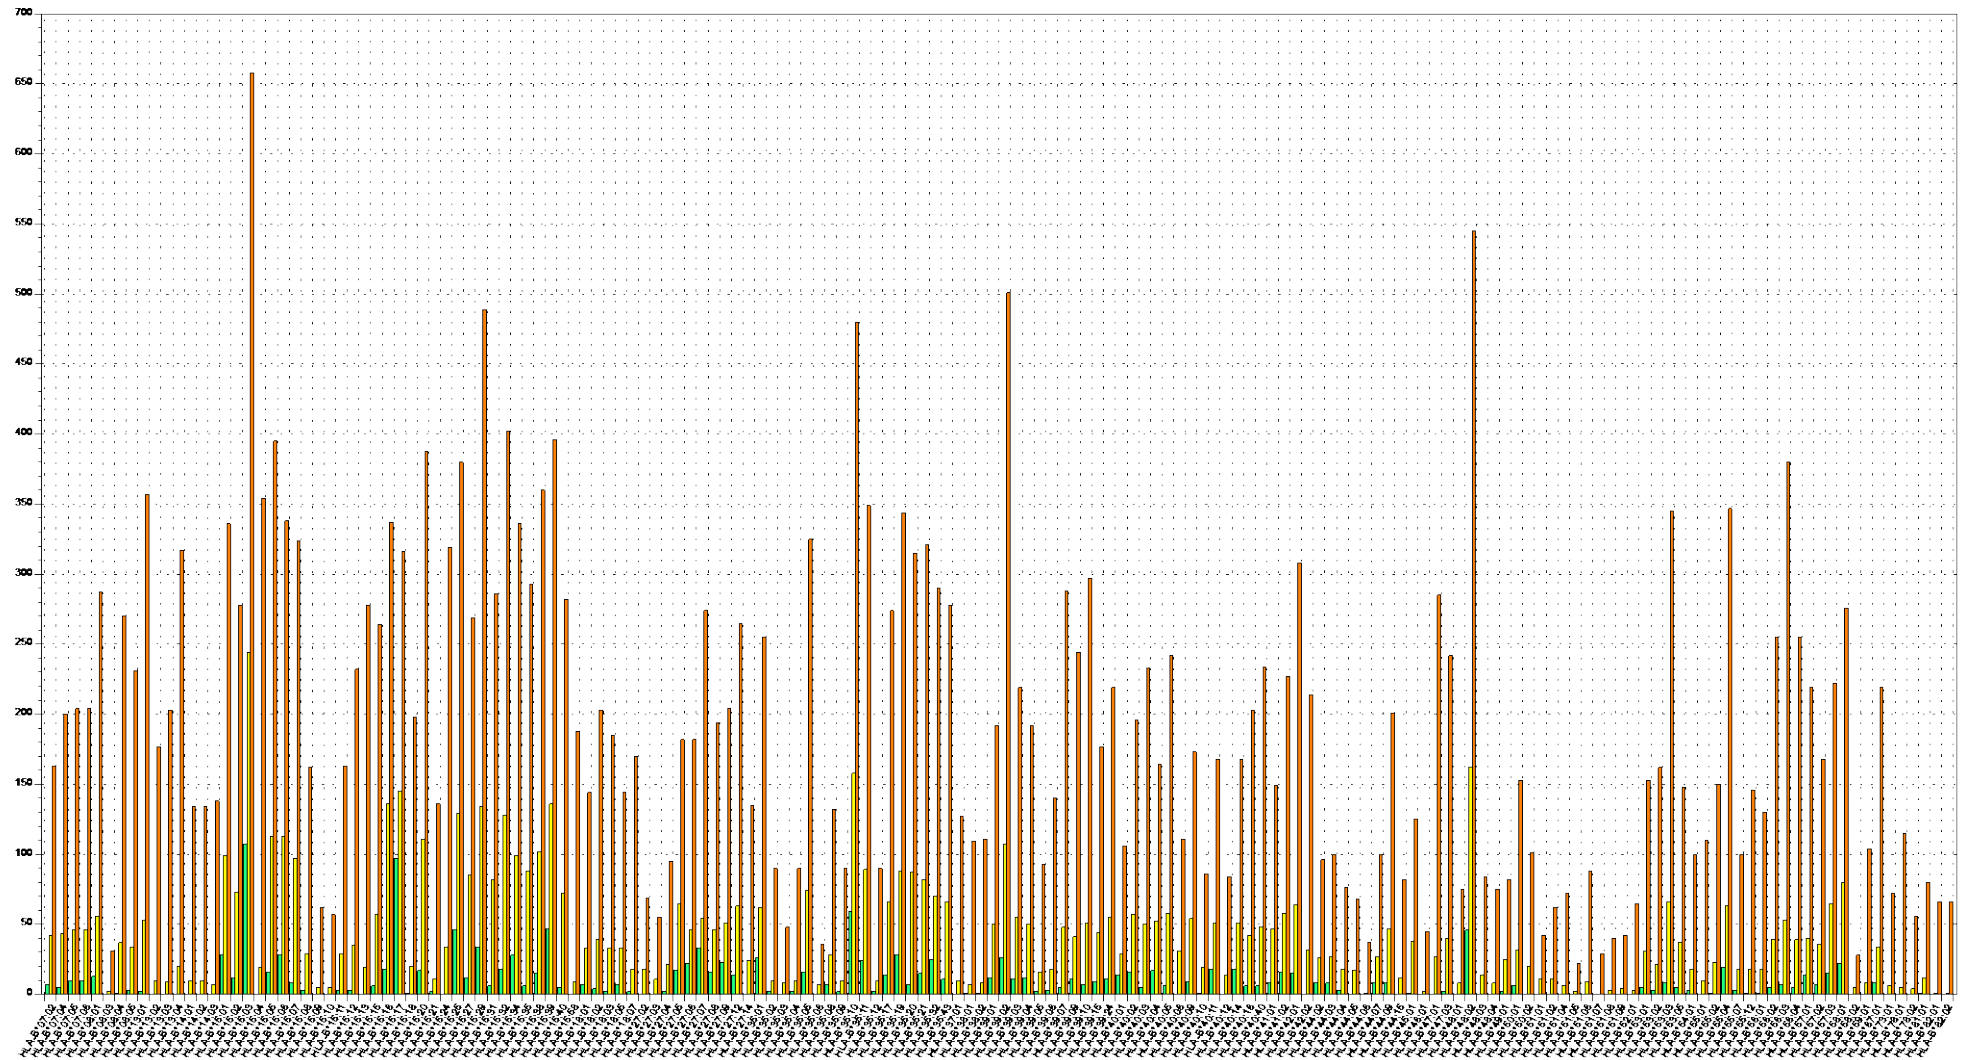

Alleles are ordered alphabetically on the x-axis, while the number of peptides binding with strong ( $IC_{50} \leq 50$  nM), regular ( $50$  nM  $< IC_{50} \leq 500$  nM) and weak ( $500$  nM  $< IC_{50} \leq 5000$  nM) binding prediction are displayed on the y-axis.

## HLA-B alleles ordered by number of presented peptides with strong binding prediction

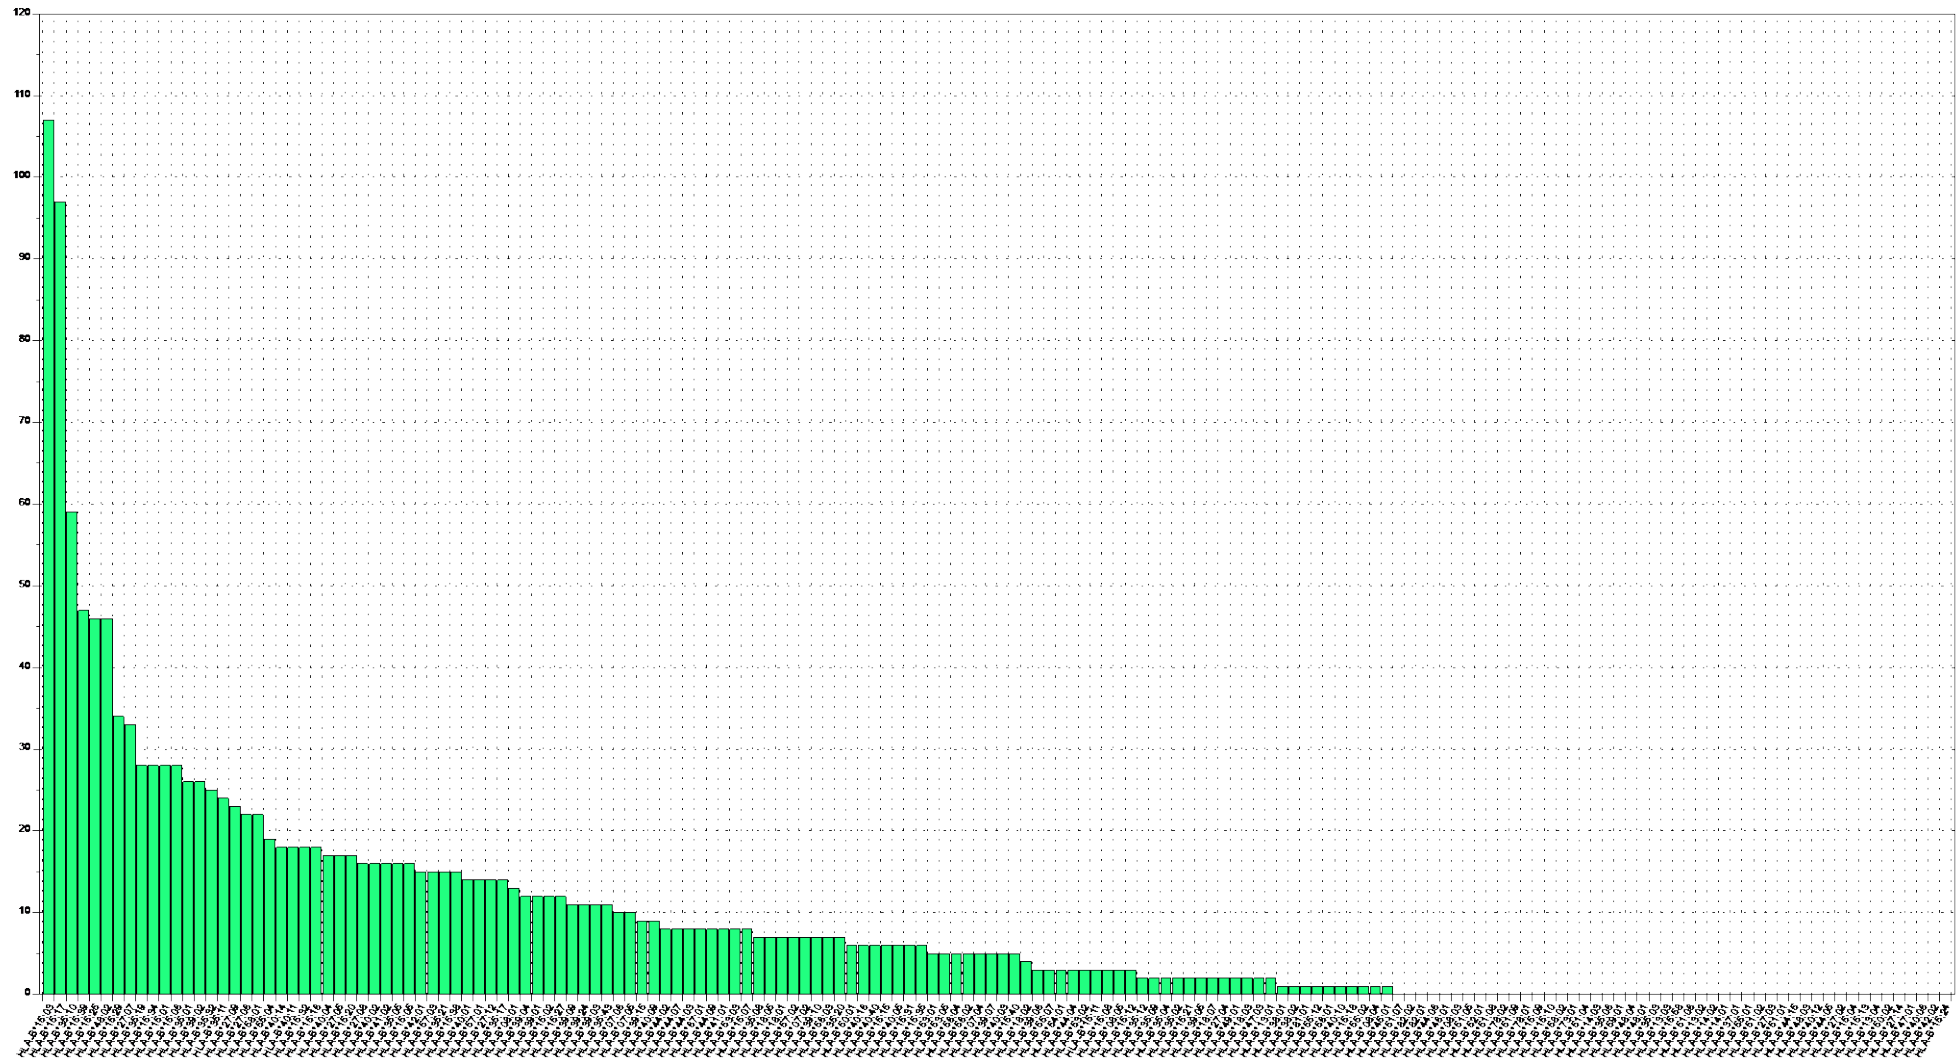

## HLA-B alleles ordered by number of presented peptides with regular binding prediction

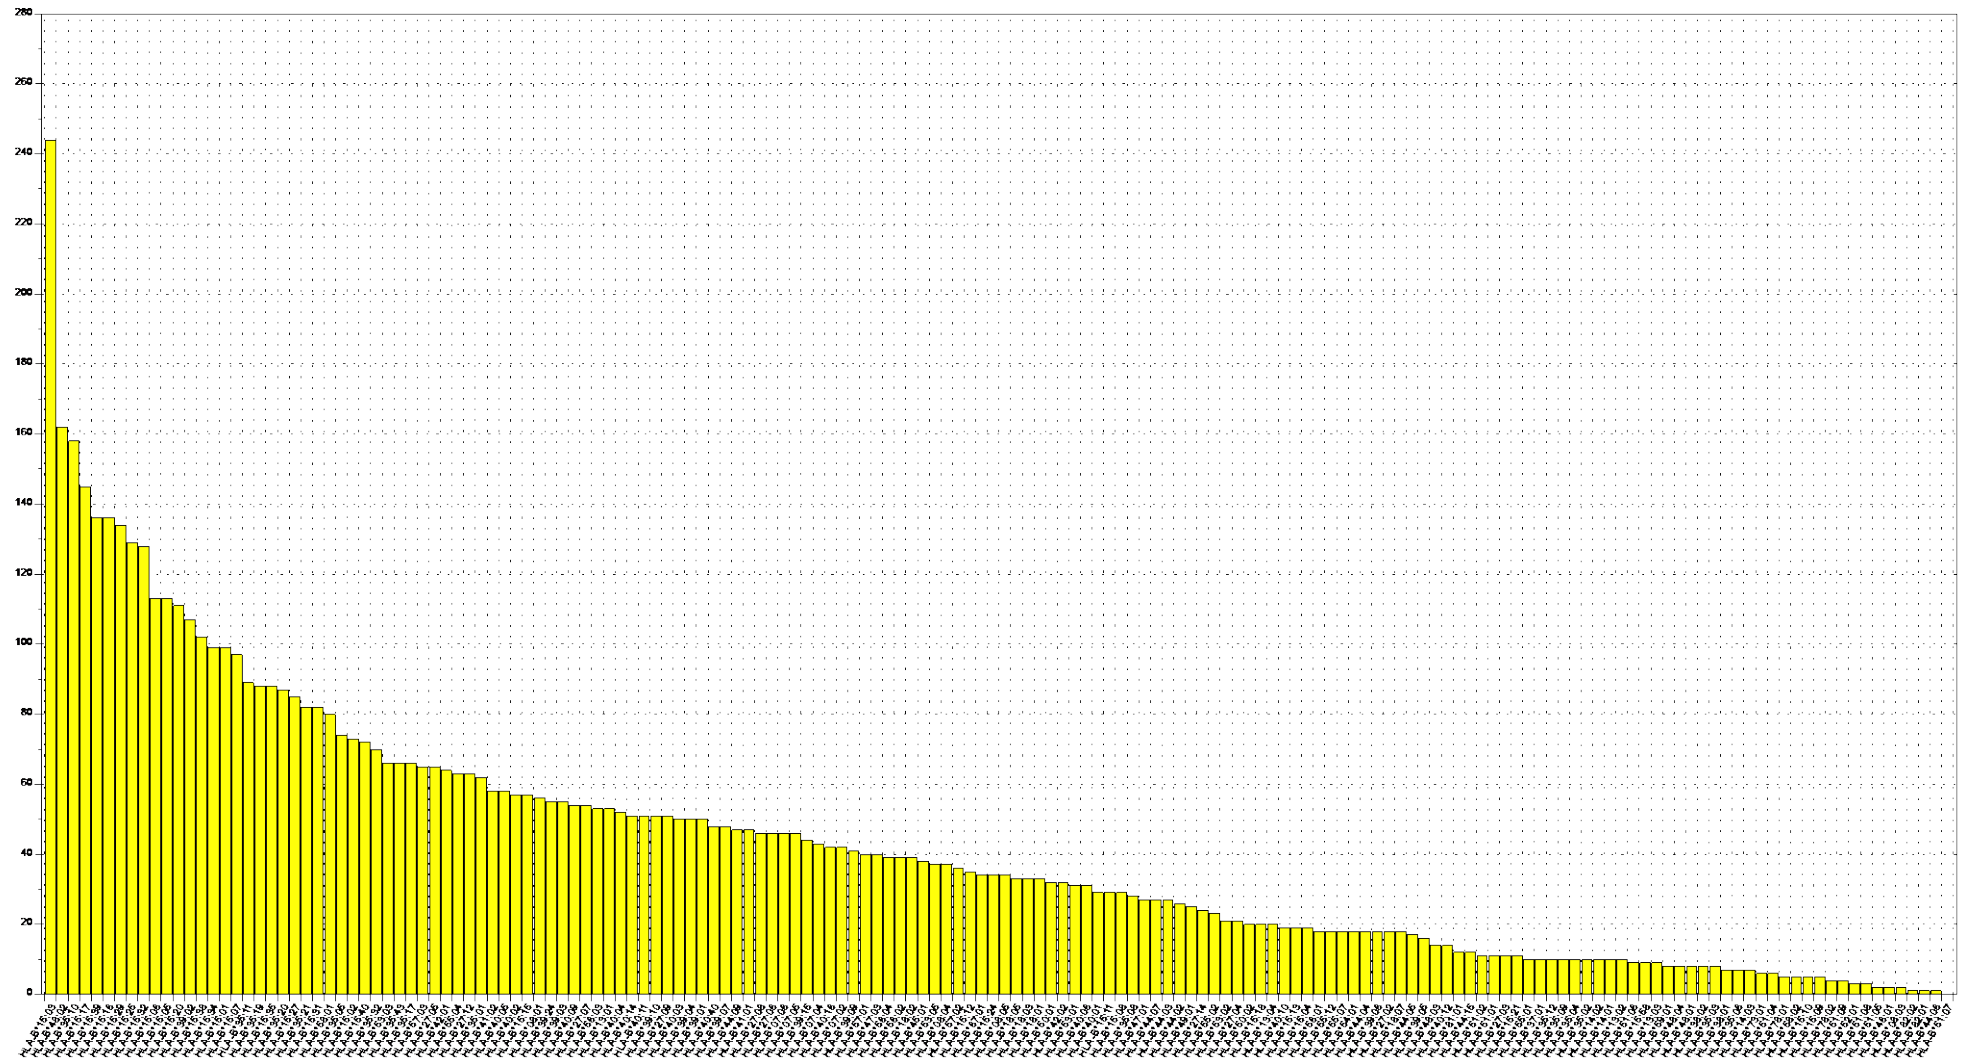

Alleles are ordered on the x-axis by their regular ( $50 \text{ nM} < IC_{50} \leq 500 \text{ nM}$ ) binding prediction and the number of peptides presented are displayed on the y-axis.

## HLA-B alleles ordered by number of presented peptides with weak binding prediction

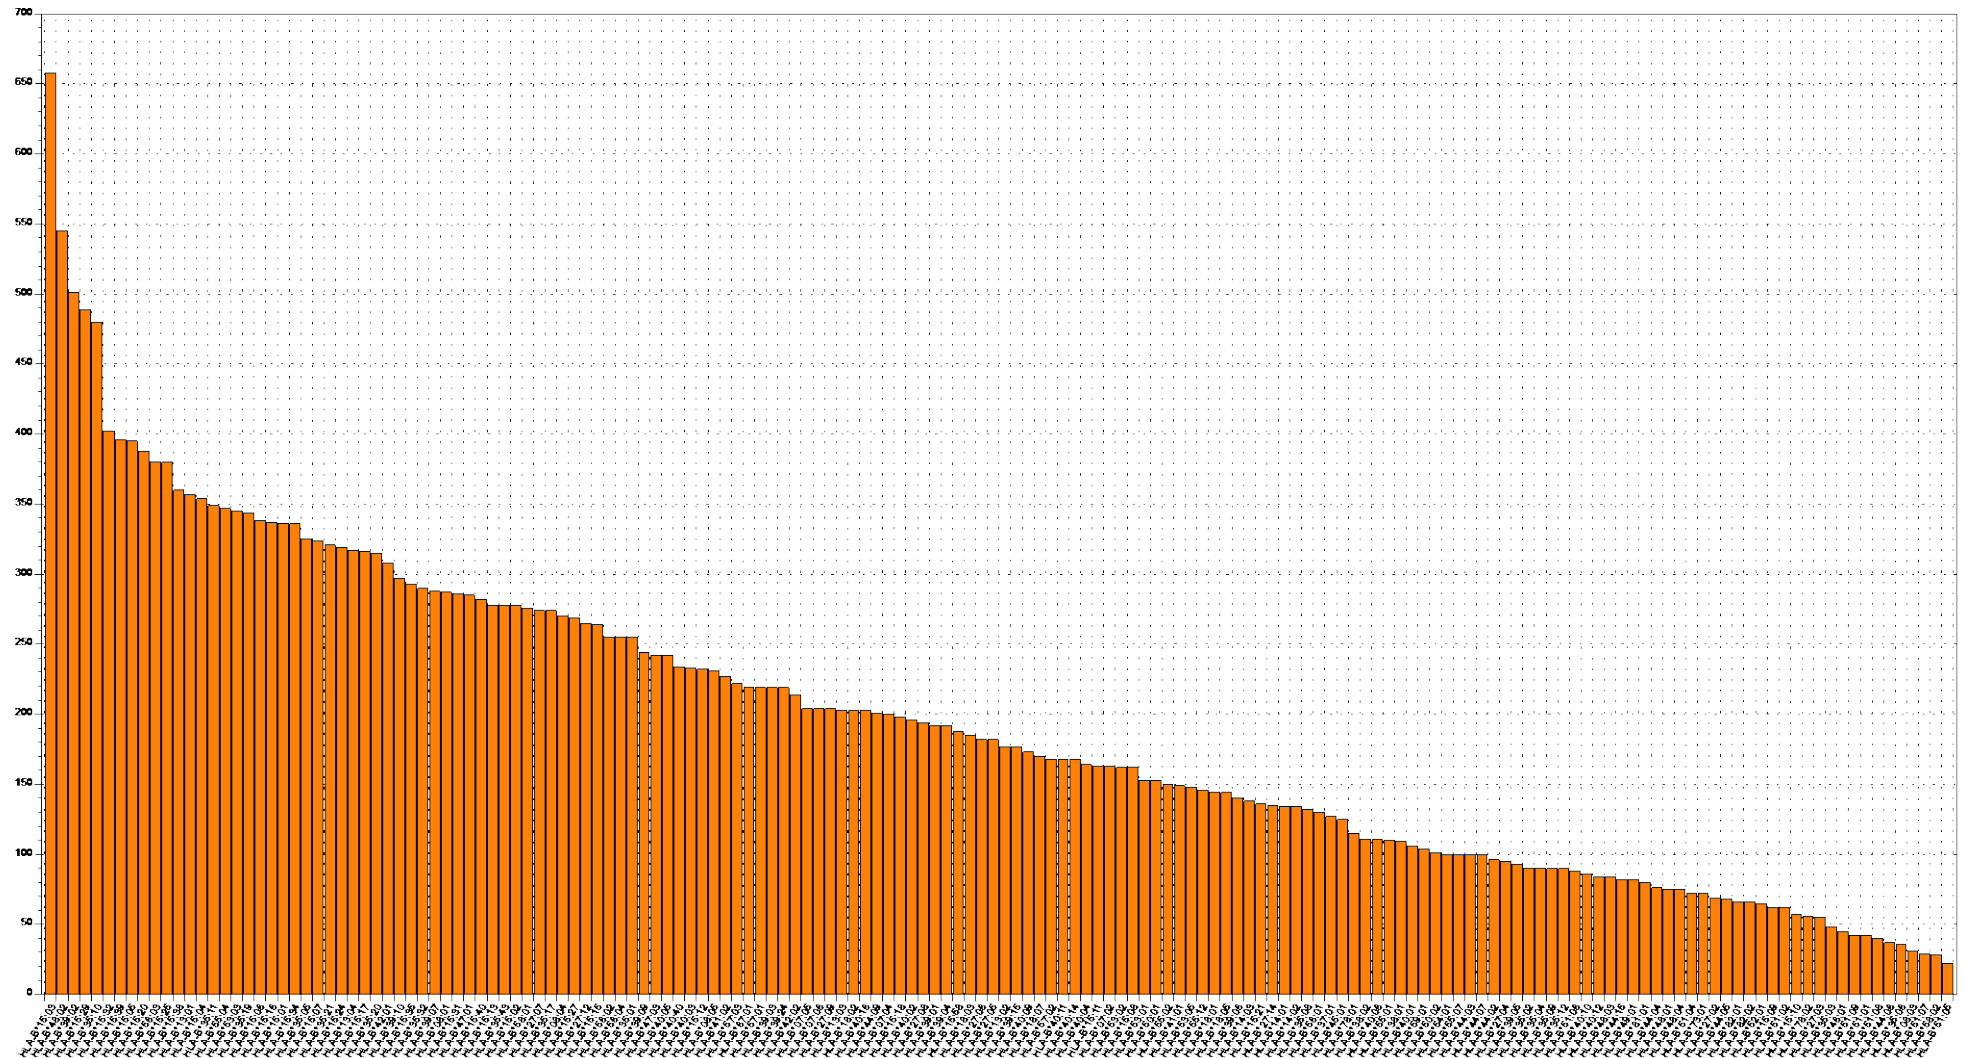

Alleles are ordered on the x-axis by their weak ( $500 \text{ nM} < \text{IC}_{50} \leq 5000 \text{ nM}$ ) binding prediction and the number of peptides presented are displayed on the y-axis.

## Total number of peptides with strong, regular and weak binding predictions for *HLA-C*

|             | <b>IC<sub>50</sub> ≤ 50 nM</b><br>Strong binders | <b>50 nM &lt; IC<sub>50</sub> ≤ 500 nM</b><br>Regular binders | <b>500 nM &lt; IC<sub>50</sub> ≤ 5000 nM</b><br>Weak binders | <b>IC<sub>50</sub> &gt; 5000 nM</b><br>Non binders |
|-------------|--------------------------------------------------|---------------------------------------------------------------|--------------------------------------------------------------|----------------------------------------------------|
| HLA-C*01:02 | 0                                                | 4                                                             | 102                                                          | 4345                                               |
| HLA-C*01:03 | 0                                                | 0                                                             | 14                                                           | 4437                                               |
| HLA-C*02:02 | 1                                                | 67                                                            | 454                                                          | 3929                                               |
| HLA-C*02:10 | 1                                                | 67                                                            | 454                                                          | 3929                                               |
| HLA-C*03:02 | 48                                               | 182                                                           | 503                                                          | 3718                                               |
| HLA-C*03:03 | 30                                               | 125                                                           | 332                                                          | 3964                                               |
| HLA-C*03:04 | 30                                               | 125                                                           | 332                                                          | 3964                                               |
| HLA-C*03:05 | 12                                               | 108                                                           | 327                                                          | 4004                                               |
| HLA-C*03:07 | 11                                               | 131                                                           | 382                                                          | 3927                                               |
| HLA-C*04:01 | 0                                                | 0                                                             | 28                                                           | 4423                                               |
| HLA-C*04:03 | 1                                                | 7                                                             | 53                                                           | 4390                                               |
| HLA-C*04:04 | 0                                                | 0                                                             | 46                                                           | 4405                                               |
| HLA-C*04:05 | 0                                                | 0                                                             | 28                                                           | 4423                                               |
| HLA-C*04:06 | 0                                                | 6                                                             | 126                                                          | 4319                                               |
| HLA-C*04:07 | 0                                                | 0                                                             | 28                                                           | 4423                                               |
| HLA-C*05:01 | 5                                                | 22                                                            | 131                                                          | 4293                                               |
| HLA-C*06:02 | 4                                                | 46                                                            | 176                                                          | 4225                                               |
| HLA-C*06:04 | 7                                                | 66                                                            | 349                                                          | 4029                                               |
| HLA-C*06:06 | 0                                                | 64                                                            | 420                                                          | 3967                                               |
| HLA-C*07:01 | 4                                                | 46                                                            | 194                                                          | 4207                                               |
| HLA-C*07:02 | 8                                                | 55                                                            | 314                                                          | 4074                                               |
| HLA-C*07:03 | 2                                                | 55                                                            | 393                                                          | 4001                                               |
| HLA-C*07:04 | 0                                                | 0                                                             | 71                                                           | 4380                                               |
| HLA-C*07:05 | 11                                               | 54                                                            | 311                                                          | 4075                                               |
| HLA-C*07:06 | 4                                                | 46                                                            | 194                                                          | 4207                                               |
| HLA-C*07:07 | 0                                                | 14                                                            | 133                                                          | 4304                                               |
| HLA-C*07:08 | 1                                                | 22                                                            | 134                                                          | 4294                                               |
| HLA-C*07:10 | 6                                                | 53                                                            | 321                                                          | 4071                                               |
| HLA-C*07:11 | 0                                                | 0                                                             | 71                                                           | 4380                                               |
| HLA-C*07:18 | 4                                                | 46                                                            | 194                                                          | 4207                                               |
| HLA-C*08:01 | 1                                                | 27                                                            | 212                                                          | 4211                                               |
| HLA-C*08:02 | 2                                                | 7                                                             | 88                                                           | 4354                                               |
| HLA-C*08:03 | 1                                                | 27                                                            | 212                                                          | 4211                                               |
| HLA-C*08:04 | 1                                                | 26                                                            | 229                                                          | 4195                                               |
| HLA-C*12:02 | 9                                                | 114                                                           | 482                                                          | 3846                                               |
| HLA-C*12:03 | 47                                               | 211                                                           | 626                                                          | 3567                                               |
| HLA-C*12:04 | 10                                               | 149                                                           | 558                                                          | 3734                                               |
| HLA-C*12:05 | 8                                                | 147                                                           | 538                                                          | 3758                                               |
| HLA-C*14:02 | 26                                               | 188                                                           | 618                                                          | 3619                                               |
| HLA-C*14:03 | 26                                               | 188                                                           | 618                                                          | 3619                                               |
| HLA-C*15:02 | 5                                                | 90                                                            | 374                                                          | 3982                                               |
| HLA-C*15:03 | 6                                                | 90                                                            | 376                                                          | 3979                                               |
| HLA-C*15:04 | 13                                               | 166                                                           | 521                                                          | 3751                                               |
| HLA-C*15:05 | 2                                                | 61                                                            | 287                                                          | 4101                                               |
| HLA-C*15:06 | 11                                               | 133                                                           | 405                                                          | 3902                                               |
| HLA-C*15:07 | 6                                                | 89                                                            | 389                                                          | 3967                                               |
| HLA-C*15:08 | 2                                                | 52                                                            | 262                                                          | 4135                                               |
| HLA-C*15:13 | 5                                                | 90                                                            | 374                                                          | 3982                                               |
| HLA-C*16:01 | 34                                               | 212                                                           | 529                                                          | 3676                                               |
| HLA-C*16:02 | 3                                                | 104                                                           | 461                                                          | 3883                                               |
| HLA-C*16:04 | 16                                               | 182                                                           | 538                                                          | 3715                                               |
| HLA-C*17:01 | 4                                                | 46                                                            | 436                                                          | 3965                                               |
| HLA-C*17:03 | 2                                                | 23                                                            | 218                                                          | 4208                                               |
| HLA-C*18:01 | 0                                                | 0                                                             | 9                                                            | 4442                                               |
| HLA-C*18:02 | 0                                                | 0                                                             | 9                                                            | 4442                                               |

Alleles are ordered alphabetically.

## General binding prediction tendencies for HLA-C

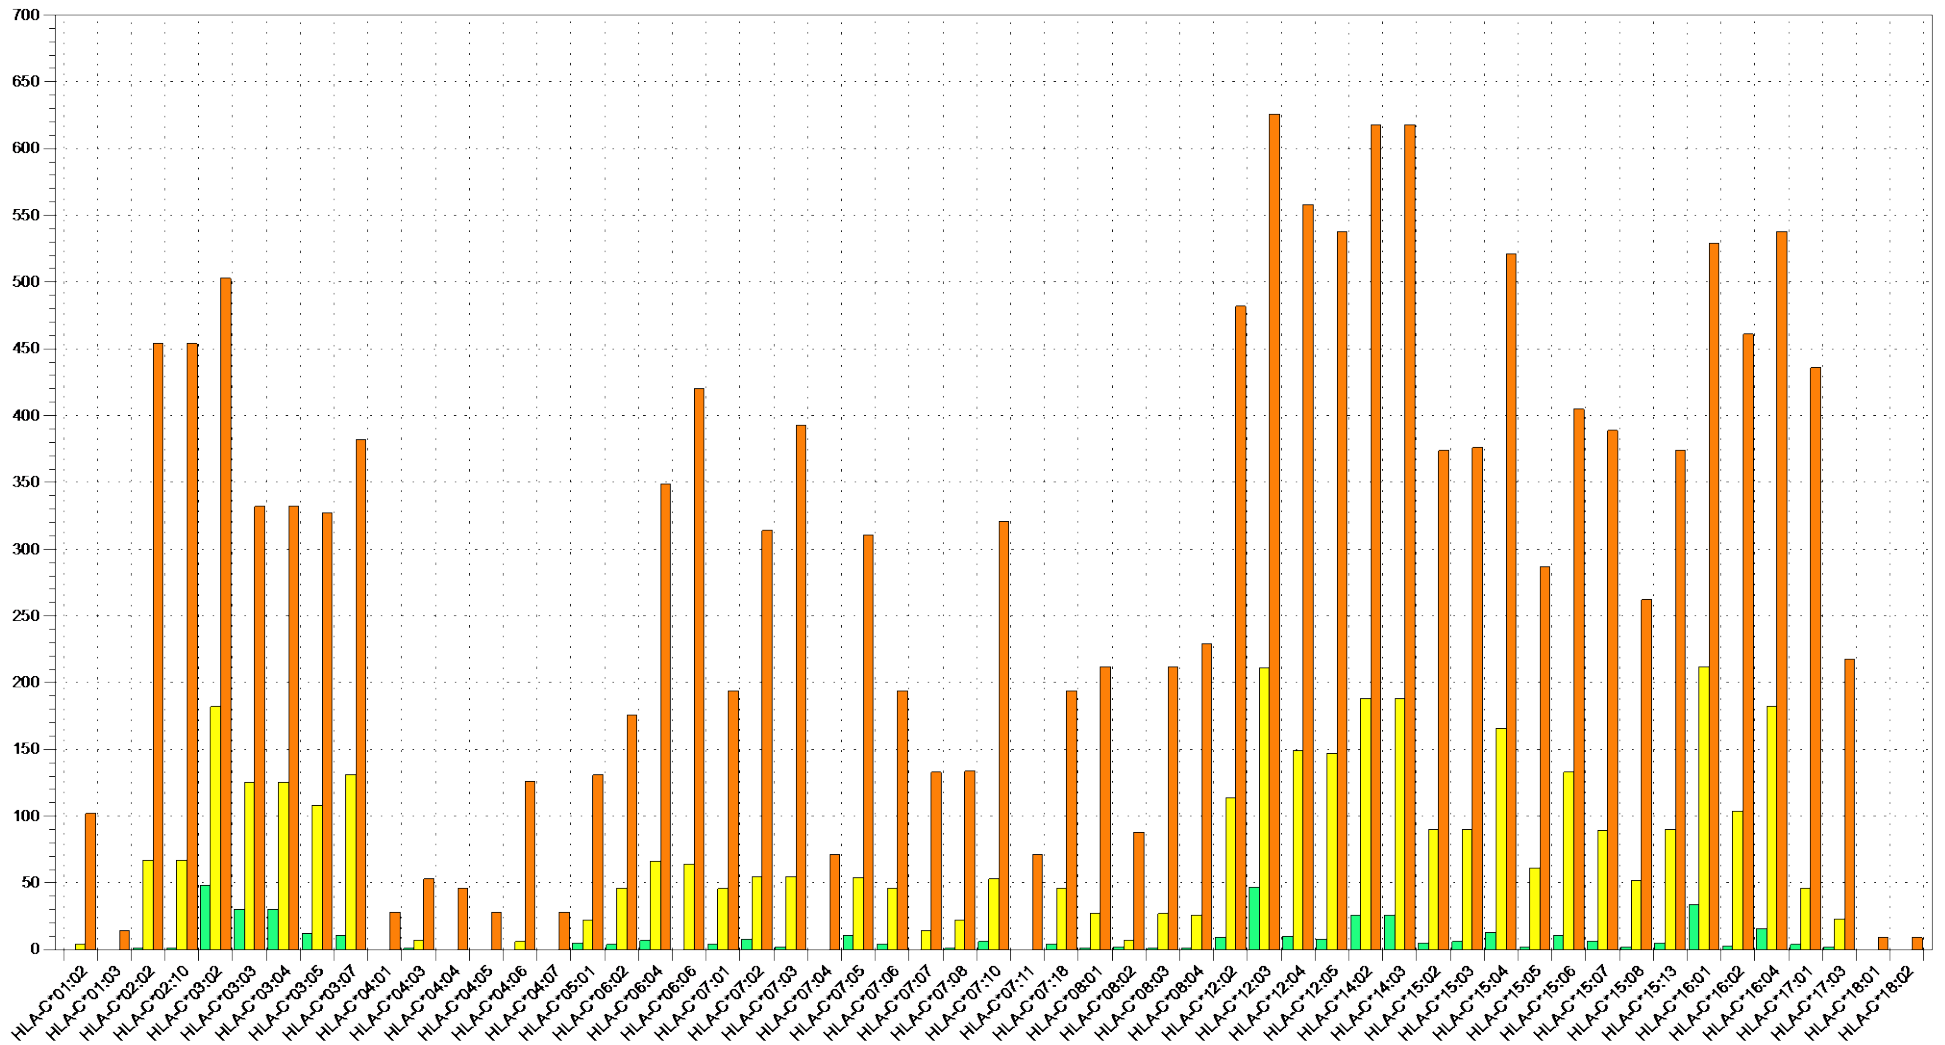

Alleles are ordered alphabetically on the x-axis, while the number of peptides binding with strong ( $IC_{50} \leq 50$  nM), regular ( $50 \text{ nM} < IC_{50} \leq 500$  nM) and weak ( $500 \text{ nM} < IC_{50} \leq 5000$  nM) binding prediction are displayed on the y-axis.



## HLA-C alleles ordered by number of presented peptides with strong binding prediction

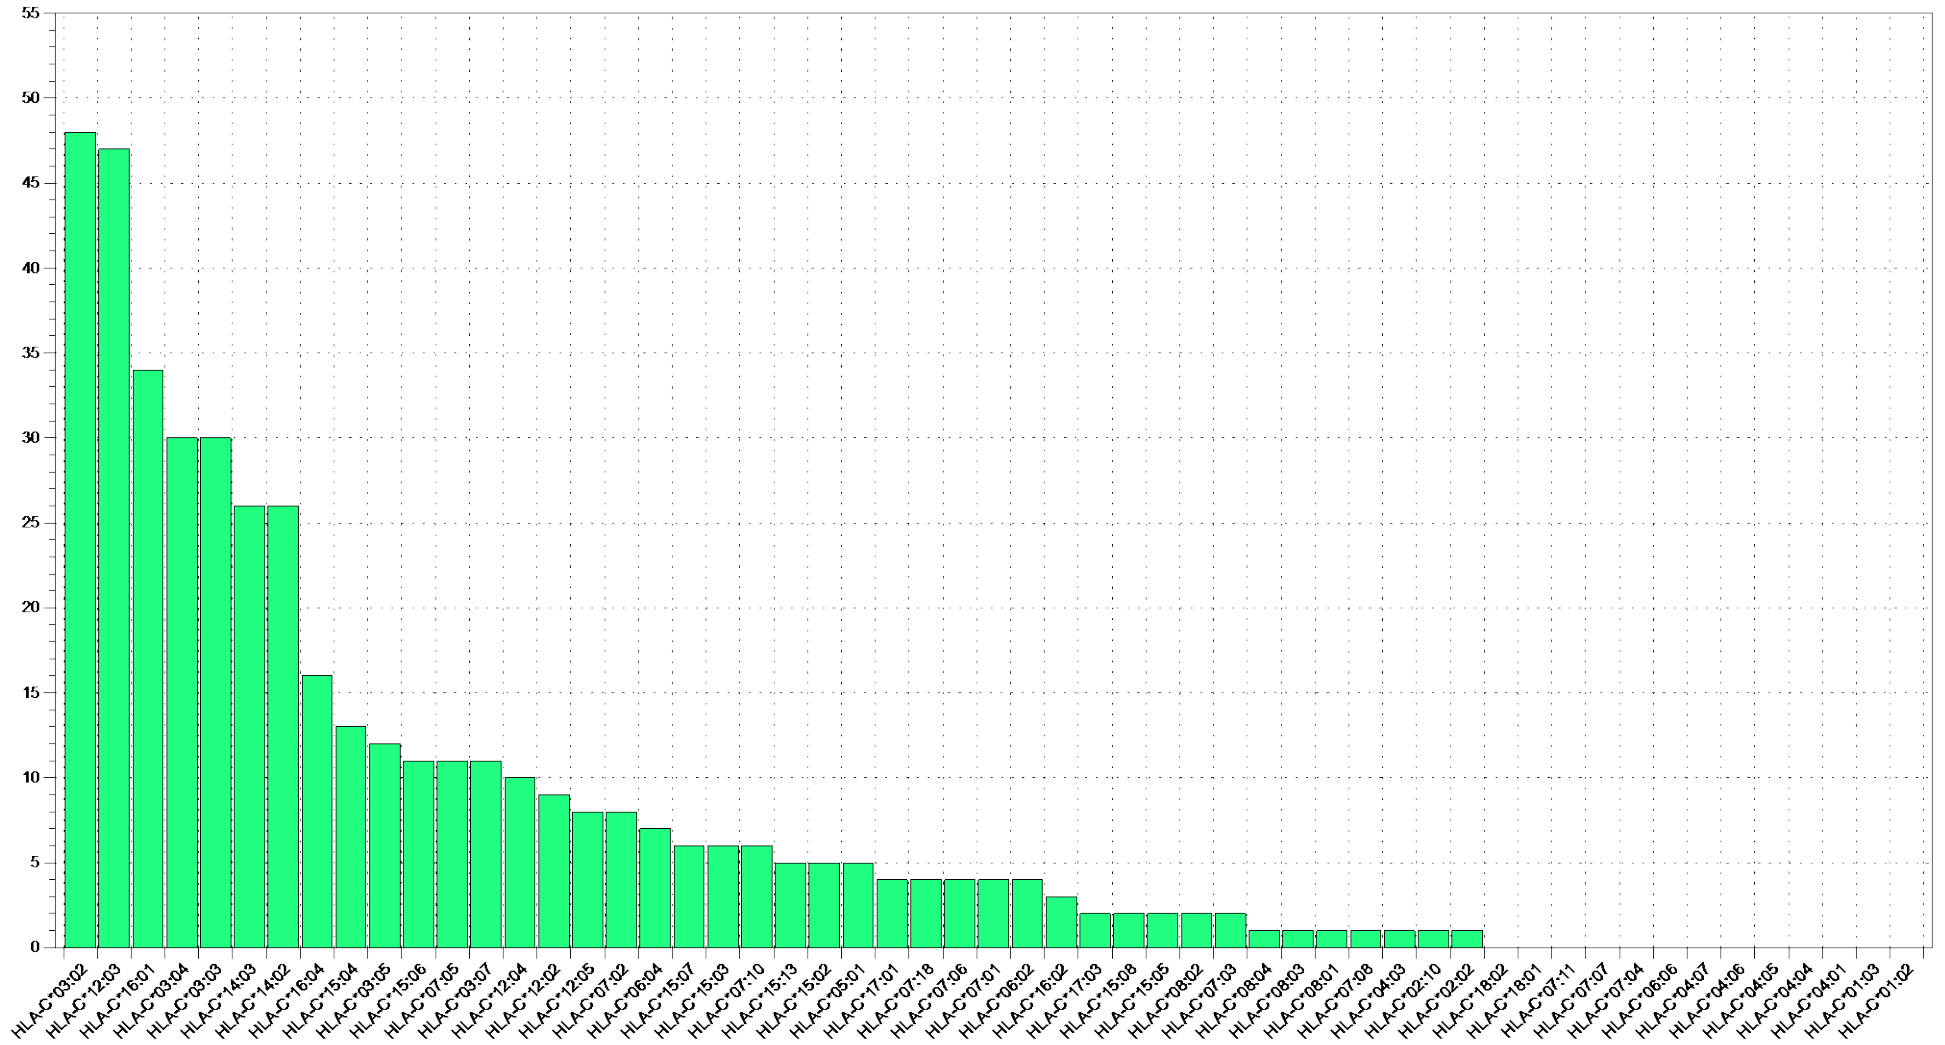

Alleles are ordered on the x-axis by their strong (IC<sub>50</sub> ≤ 50 nM) binding prediction and the number of peptides presented are displayed on the y-axis.

## HLA-C alleles ordered by number of presented peptides with regular binding prediction

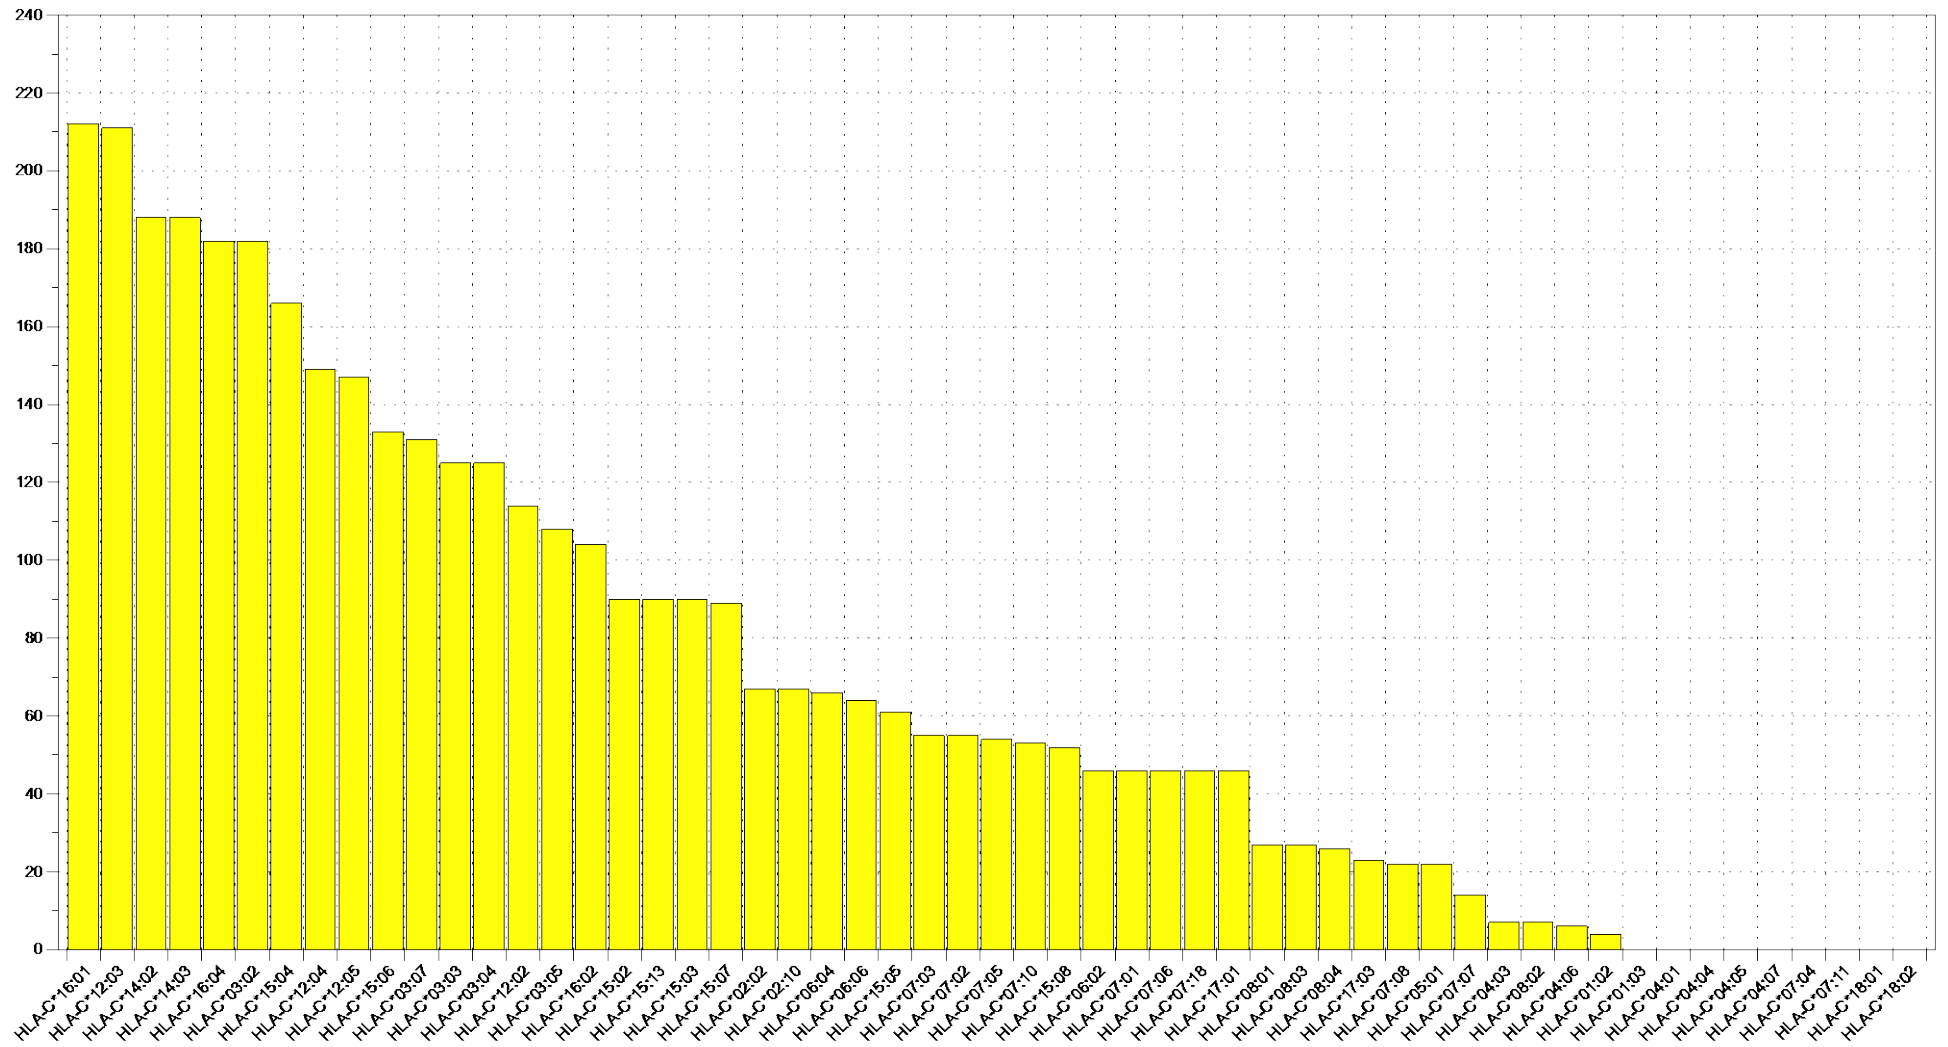

Alleles are ordered on the x-axis by their regular (50 nM < IC<sub>50</sub> ≤ 500 nM) binding prediction and the number of peptides presented are displayed on the y-axis.

## HLA-C alleles ordered by number of presented peptides with weak binding prediction

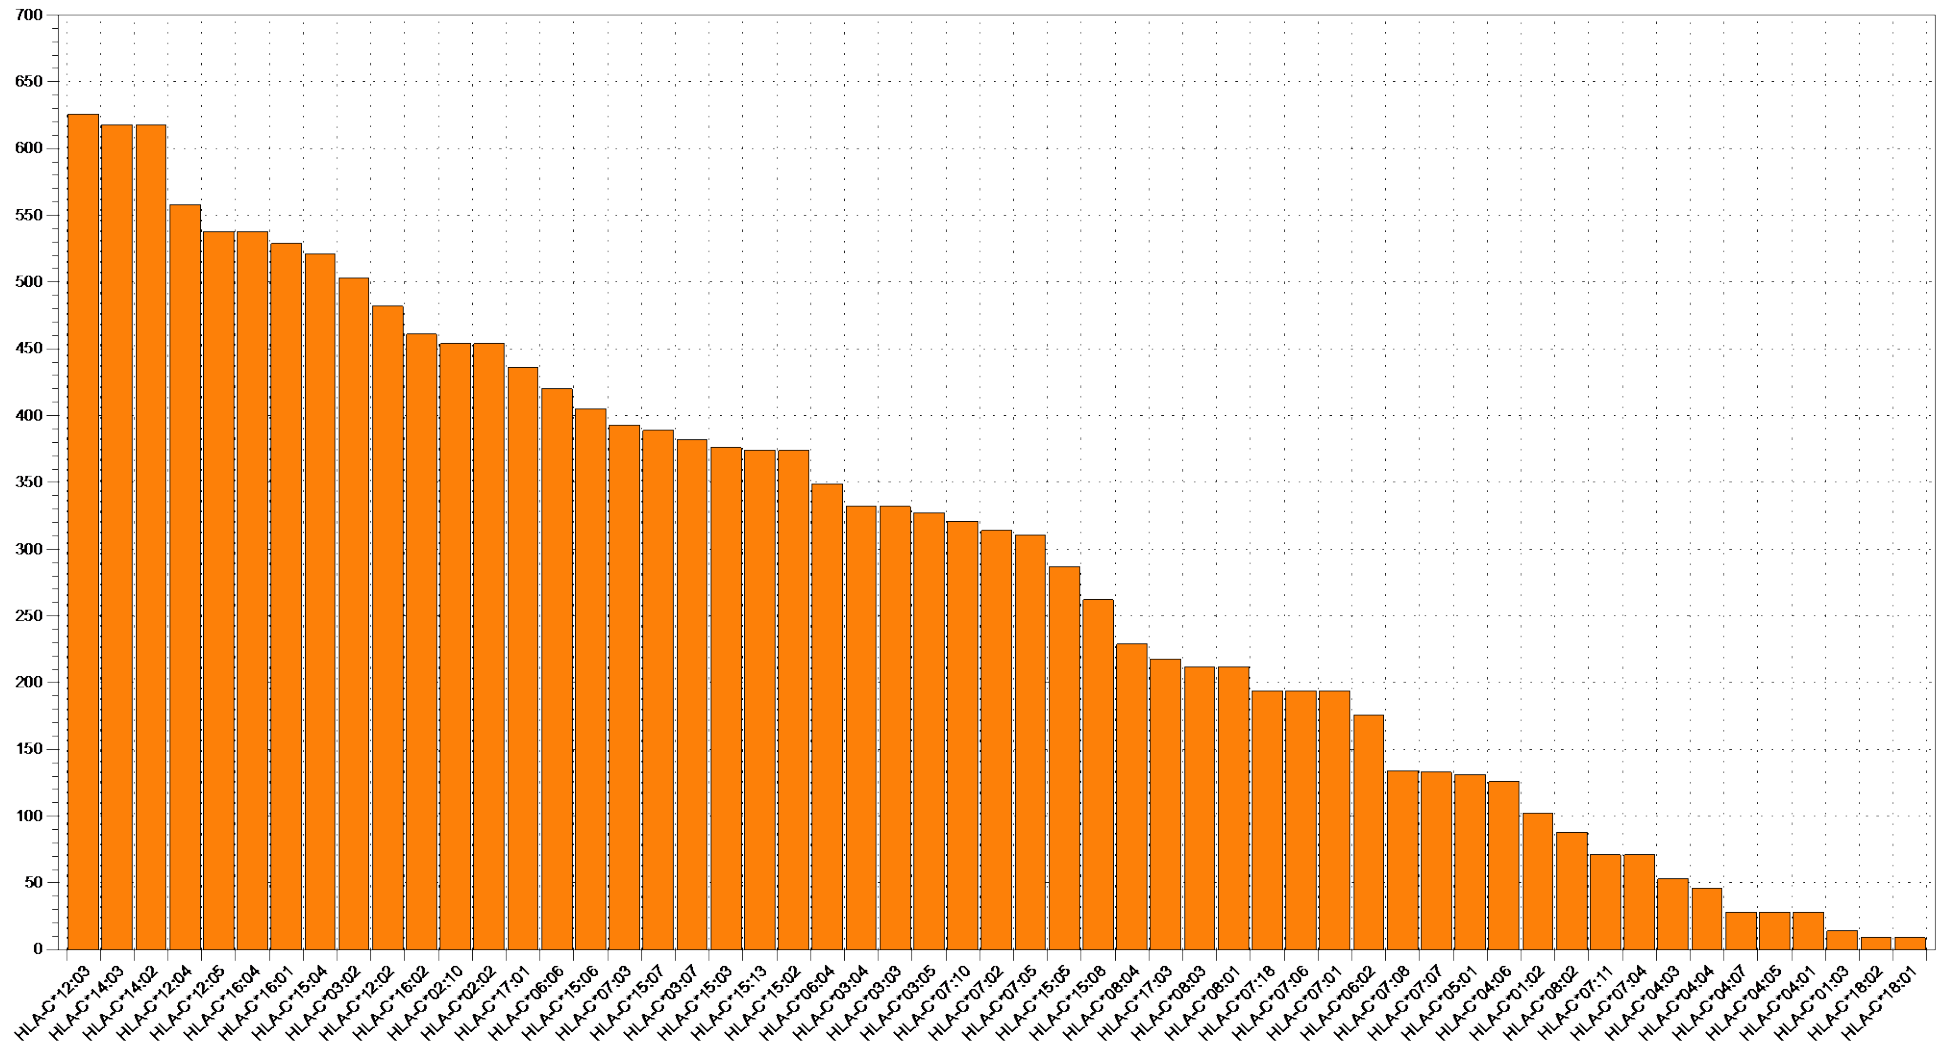

Alleles are ordered on the x-axis by their weak ( $500 \text{ nM} < \text{IC}_{50} \leq 5000 \text{ nM}$ ) binding prediction and the number of peptides presented are displayed on the y-axis.

## Total number of peptides with strong, regular and weak binding predictions for *HLA-DRB1*

|                | IC <sub>50</sub> ≤ 50 nM<br>Strong binders | 50 nM < IC <sub>50</sub> ≤ 1000 nM<br>Regular binders | 1000 nM < IC <sub>50</sub> ≤ 5000 nM<br>Weak binders | IC <sub>50</sub> > 5000 nM<br>Non binders |
|----------------|--------------------------------------------|-------------------------------------------------------|------------------------------------------------------|-------------------------------------------|
| HLA-DRB1*01:01 | 341                                        | 2161                                                  | 1231                                                 | 674                                       |
| HLA-DRB1*01:02 | 10                                         | 1078                                                  | 1792                                                 | 1527                                      |
| HLA-DRB1*01:03 | 0                                          | 252                                                   | 1320                                                 | 2835                                      |
| HLA-DRB1*01:04 | 115                                        | 2012                                                  | 1462                                                 | 818                                       |
| HLA-DRB1*03:01 | 3                                          | 529                                                   | 1712                                                 | 2163                                      |
| HLA-DRB1*03:02 | 0                                          | 0                                                     | 93                                                   | 4314                                      |
| HLA-DRB1*03:03 | 0                                          | 36                                                    | 531                                                  | 3840                                      |
| HLA-DRB1*03:04 | 3                                          | 529                                                   | 1712                                                 | 2163                                      |
| HLA-DRB1*03:05 | 0                                          | 156                                                   | 1203                                                 | 3048                                      |
| HLA-DRB1*03:06 | 0                                          | 332                                                   | 1673                                                 | 2402                                      |
| HLA-DRB1*03:07 | 0                                          | 247                                                   | 1304                                                 | 2856                                      |
| HLA-DRB1*03:08 | 3                                          | 529                                                   | 1712                                                 | 2163                                      |
| HLA-DRB1*04:01 | 17                                         | 1143                                                  | 1976                                                 | 1271                                      |
| HLA-DRB1*04:02 | 0                                          | 711                                                   | 1722                                                 | 1974                                      |
| HLA-DRB1*04:03 | 0                                          | 532                                                   | 1714                                                 | 2161                                      |
| HLA-DRB1*04:04 | 16                                         | 1335                                                  | 1681                                                 | 1375                                      |
| HLA-DRB1*04:05 | 11                                         | 1073                                                  | 1830                                                 | 1493                                      |
| HLA-DRB1*04:06 | 0                                          | 532                                                   | 1714                                                 | 2161                                      |
| HLA-DRB1*04:07 | 0                                          | 247                                                   | 1449                                                 | 2711                                      |
| HLA-DRB1*04:08 | 11                                         | 940                                                   | 1883                                                 | 1573                                      |
| HLA-DRB1*04:10 | 4                                          | 1248                                                  | 1684                                                 | 1471                                      |
| HLA-DRB1*04:11 | 0                                          | 617                                                   | 1750                                                 | 2040                                      |
| HLA-DRB1*04:13 | 12                                         | 1618                                                  | 1759                                                 | 1018                                      |
| HLA-DRB1*04:15 | 1                                          | 223                                                   | 1133                                                 | 3050                                      |
| HLA-DRB1*04:17 | 0                                          | 314                                                   | 1670                                                 | 2423                                      |
| HLA-DRB1*07:01 | 76                                         | 1366                                                  | 1601                                                 | 1364                                      |
| HLA-DRB1*08:01 | 1                                          | 860                                                   | 1676                                                 | 1870                                      |
| HLA-DRB1*08:02 | 0                                          | 631                                                   | 1811                                                 | 1965                                      |
| HLA-DRB1*08:03 | 0                                          | 187                                                   | 1651                                                 | 2569                                      |
| HLA-DRB1*08:04 | 5                                          | 774                                                   | 1663                                                 | 1965                                      |
| HLA-DRB1*08:05 | 14                                         | 881                                                   | 1562                                                 | 1950                                      |
| HLA-DRB1*08:06 | 3                                          | 695                                                   | 1618                                                 | 2091                                      |
| HLA-DRB1*08:07 | 0                                          | 1207                                                  | 1846                                                 | 1354                                      |
| HLA-DRB1*08:09 | 0                                          | 631                                                   | 1811                                                 | 1965                                      |
| HLA-DRB1*08:10 | 0                                          | 635                                                   | 1766                                                 | 2006                                      |
| HLA-DRB1*08:11 | 0                                          | 1283                                                  | 1763                                                 | 1361                                      |
| HLA-DRB1*08:12 | 0                                          | 199                                                   | 1603                                                 | 2605                                      |
| HLA-DRB1*09:01 | 23                                         | 1342                                                  | 1841                                                 | 1201                                      |
| HLA-DRB1*10:01 | 160                                        | 2053                                                  | 1399                                                 | 795                                       |
| HLA-DRB1*11:01 | 57                                         | 1068                                                  | 1395                                                 | 1887                                      |
| HLA-DRB1*11:02 | 150                                        | 1800                                                  | 1328                                                 | 1129                                      |
| HLA-DRB1*11:03 | 74                                         | 1279                                                  | 1645                                                 | 1409                                      |
| HLA-DRB1*11:04 | 39                                         | 909                                                   | 1548                                                 | 1911                                      |
| HLA-DRB1*11:05 | 23                                         | 1126                                                  | 1590                                                 | 1668                                      |
| HLA-DRB1*11:06 | 13                                         | 527                                                   | 1363                                                 | 2504                                      |
| HLA-DRB1*11:08 | 12                                         | 1630                                                  | 1657                                                 | 1108                                      |
| HLA-DRB1*11:09 | 57                                         | 1068                                                  | 1395                                                 | 1887                                      |
| HLA-DRB1*11:10 | 57                                         | 1068                                                  | 1395                                                 | 1887                                      |
| HLA-DRB1*11:11 | 50                                         | 1299                                                  | 1547                                                 | 1511                                      |
| HLA-DRB1*11:12 | 57                                         | 1068                                                  | 1395                                                 | 1887                                      |
| HLA-DRB1*11:14 | 62                                         | 1190                                                  | 1662                                                 | 1493                                      |
| HLA-DRB1*11:15 | 57                                         | 1068                                                  | 1395                                                 | 1887                                      |
| HLA-DRB1*11:19 | 0                                          | 796                                                   | 1874                                                 | 1737                                      |
| HLA-DRB1*11:28 | 57                                         | 1068                                                  | 1395                                                 | 1887                                      |
| HLA-DRB1*12:01 | 0                                          | 454                                                   | 1529                                                 | 2424                                      |
| HLA-DRB1*12:02 | 0                                          | 253                                                   | 1169                                                 | 2985                                      |
| HLA-DRB1*12:03 | 1                                          | 864                                                   | 1634                                                 | 1908                                      |
| HLA-DRB1*13:01 | 150                                        | 1800                                                  | 1328                                                 | 1129                                      |
| HLA-DRB1*13:02 | 62                                         | 1190                                                  | 1662                                                 | 1493                                      |
| HLA-DRB1*13:03 | 0                                          | 751                                                   | 2010                                                 | 1646                                      |
| HLA-DRB1*13:04 | 85                                         | 1568                                                  | 1536                                                 | 1218                                      |
| HLA-DRB1*13:05 | 57                                         | 1068                                                  | 1395                                                 | 1887                                      |

|                | <b>IC<sub>50</sub> ≤ 50 nM</b><br><b>Strong binders</b> | <b>50 nM &lt; IC<sub>50</sub> ≤ 1000 nM</b><br><b>Regular binders</b> | <b>1000 nM &lt; IC<sub>50</sub> ≤ 5000 nM</b><br><b>Weak binders</b> | <b>IC<sub>50</sub> &gt; 5000 nM</b><br><b>Non binders</b> |
|----------------|---------------------------------------------------------|-----------------------------------------------------------------------|----------------------------------------------------------------------|-----------------------------------------------------------|
| HLA-DRB1*13:06 | 33                                                      | 1288                                                                  | 1551                                                                 | 1535                                                      |
| HLA-DRB1*13:07 | 30                                                      | 879                                                                   | 1405                                                                 | 2093                                                      |
| HLA-DRB1*13:08 | 79                                                      | 1634                                                                  | 1515                                                                 | 1179                                                      |
| HLA-DRB1*13:10 | 0                                                       | 420                                                                   | 1827                                                                 | 2160                                                      |
| HLA-DRB1*13:11 | 39                                                      | 909                                                                   | 1548                                                                 | 1911                                                      |
| HLA-DRB1*13:12 | 0                                                       | 760                                                                   | 1916                                                                 | 1731                                                      |
| HLA-DRB1*13:22 | 150                                                     | 1800                                                                  | 1328                                                                 | 1129                                                      |
| HLA-DRB1*14:01 | 0                                                       | 1620                                                                  | 1905                                                                 | 882                                                       |
| HLA-DRB1*14:02 | 0                                                       | 761                                                                   | 2122                                                                 | 1524                                                      |
| HLA-DRB1*14:03 | 0                                                       | 314                                                                   | 1696                                                                 | 2397                                                      |
| HLA-DRB1*14:04 | 0                                                       | 1277                                                                  | 2110                                                                 | 1020                                                      |
| HLA-DRB1*14:05 | 0                                                       | 926                                                                   | 2051                                                                 | 1430                                                      |
| HLA-DRB1*14:06 | 12                                                      | 1505                                                                  | 1815                                                                 | 1075                                                      |
| HLA-DRB1*14:07 | 0                                                       | 621                                                                   | 2365                                                                 | 1421                                                      |
| HLA-DRB1*14:08 | 0                                                       | 926                                                                   | 2051                                                                 | 1430                                                      |
| HLA-DRB1*14:09 | 4                                                       | 1400                                                                  | 2037                                                                 | 966                                                       |
| HLA-DRB1*14:10 | 0                                                       | 684                                                                   | 1883                                                                 | 1840                                                      |
| HLA-DRB1*14:12 | 0                                                       | 769                                                                   | 1867                                                                 | 1771                                                      |
| HLA-DRB1*14:13 | 0                                                       | 797                                                                   | 2152                                                                 | 1458                                                      |
| HLA-DRB1*14:14 | 0                                                       | 340                                                                   | 1926                                                                 | 2141                                                      |
| HLA-DRB1*14:18 | 0                                                       | 467                                                                   | 1940                                                                 | 2000                                                      |
| HLA-DRB1*14:54 | 0                                                       | 1620                                                                  | 1905                                                                 | 882                                                       |
| HLA-DRB1*15:01 | 9                                                       | 1022                                                                  | 1546                                                                 | 1830                                                      |
| HLA-DRB1*15:02 | 5                                                       | 579                                                                   | 1746                                                                 | 2077                                                      |
| HLA-DRB1*15:03 | 0                                                       | 390                                                                   | 1352                                                                 | 2665                                                      |
| HLA-DRB1*15:04 | 10                                                      | 775                                                                   | 1530                                                                 | 2092                                                      |
| HLA-DRB1*15:06 | 9                                                       | 1022                                                                  | 1546                                                                 | 1830                                                      |
| HLA-DRB1*15:11 | 2                                                       | 479                                                                   | 1726                                                                 | 2200                                                      |
| HLA-DRB1*16:01 | 9                                                       | 605                                                                   | 1498                                                                 | 2295                                                      |
| HLA-DRB1*16:02 | 17                                                      | 1105                                                                  | 1843                                                                 | 1442                                                      |
| HLA-DRB1*16:03 | 9                                                       | 605                                                                   | 1498                                                                 | 2295                                                      |
| HLA-DRB1*16:05 | 7                                                       | 565                                                                   | 1739                                                                 | 2096                                                      |

Alleles are ordered alphabetically.

## General binding prediction tendencies for *HLA-DRB1*

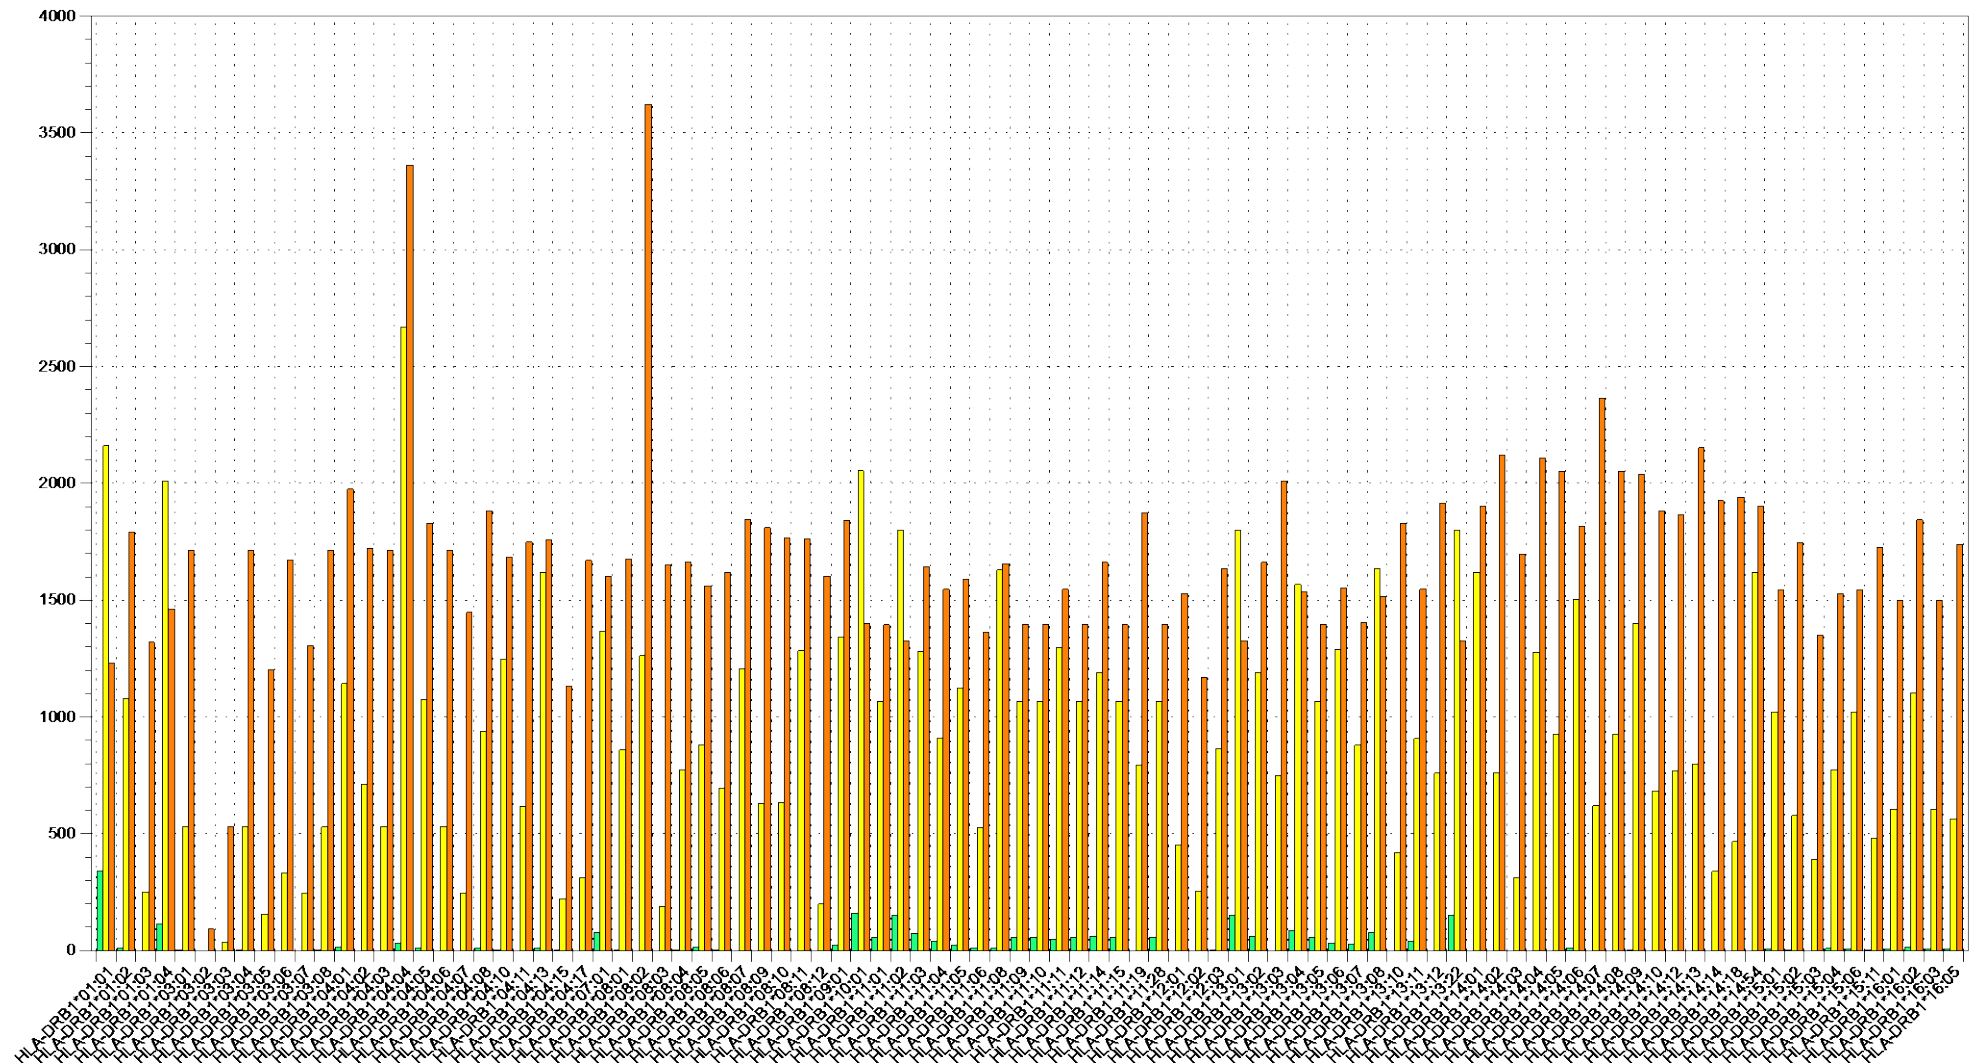

Alleles are ordered alphabetically on the x-axis, while the number of peptides binding with strong ( $IC_{50} \leq 50$  nM), regular ( $50$  nM  $< IC_{50} \leq 1000$  nM) and weak ( $1000$  nM  $< IC_{50} \leq 5000$  nM) binding prediction are displayed on the y-axis.



## HLA-DRB1 alleles ordered by number of presented peptides with regular binding prediction

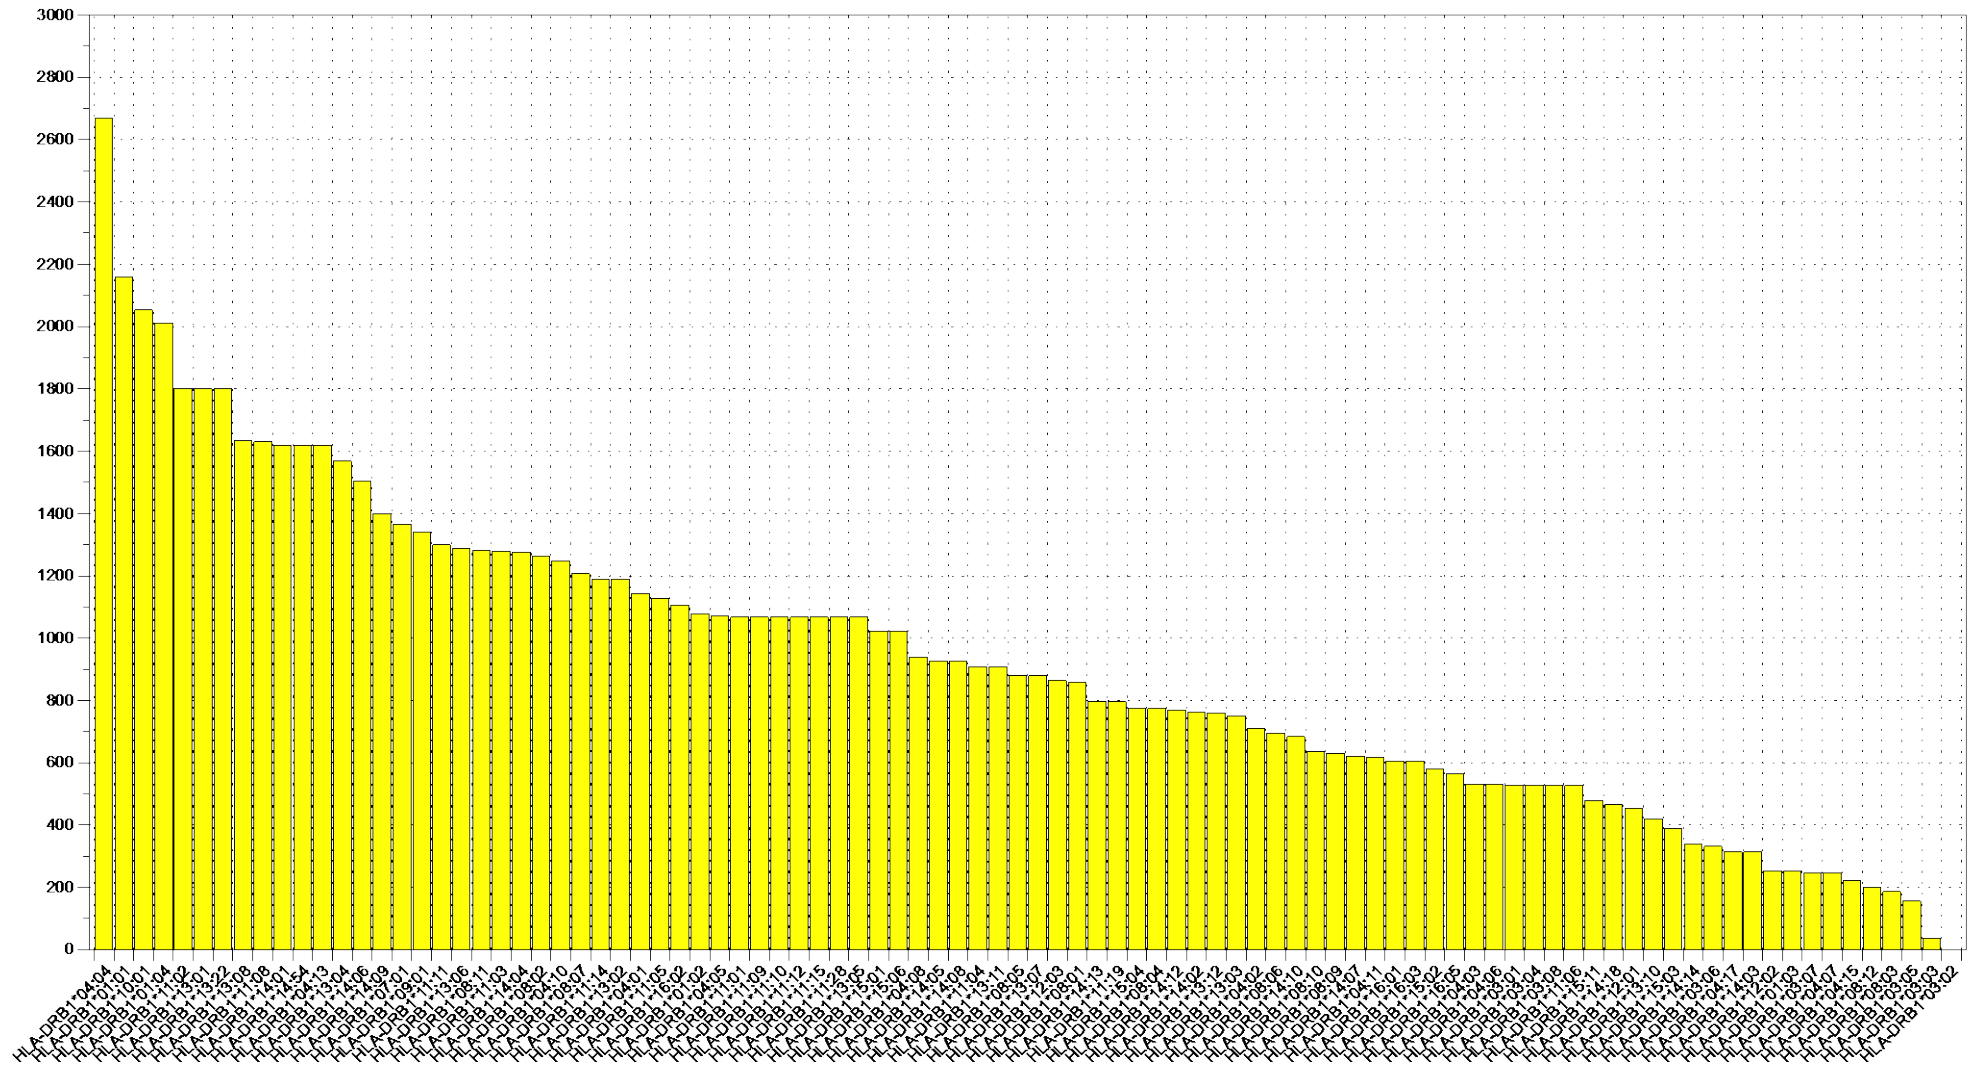



## HLA-DRB1 alleles ordered by number of presented peptides with weak binding prediction

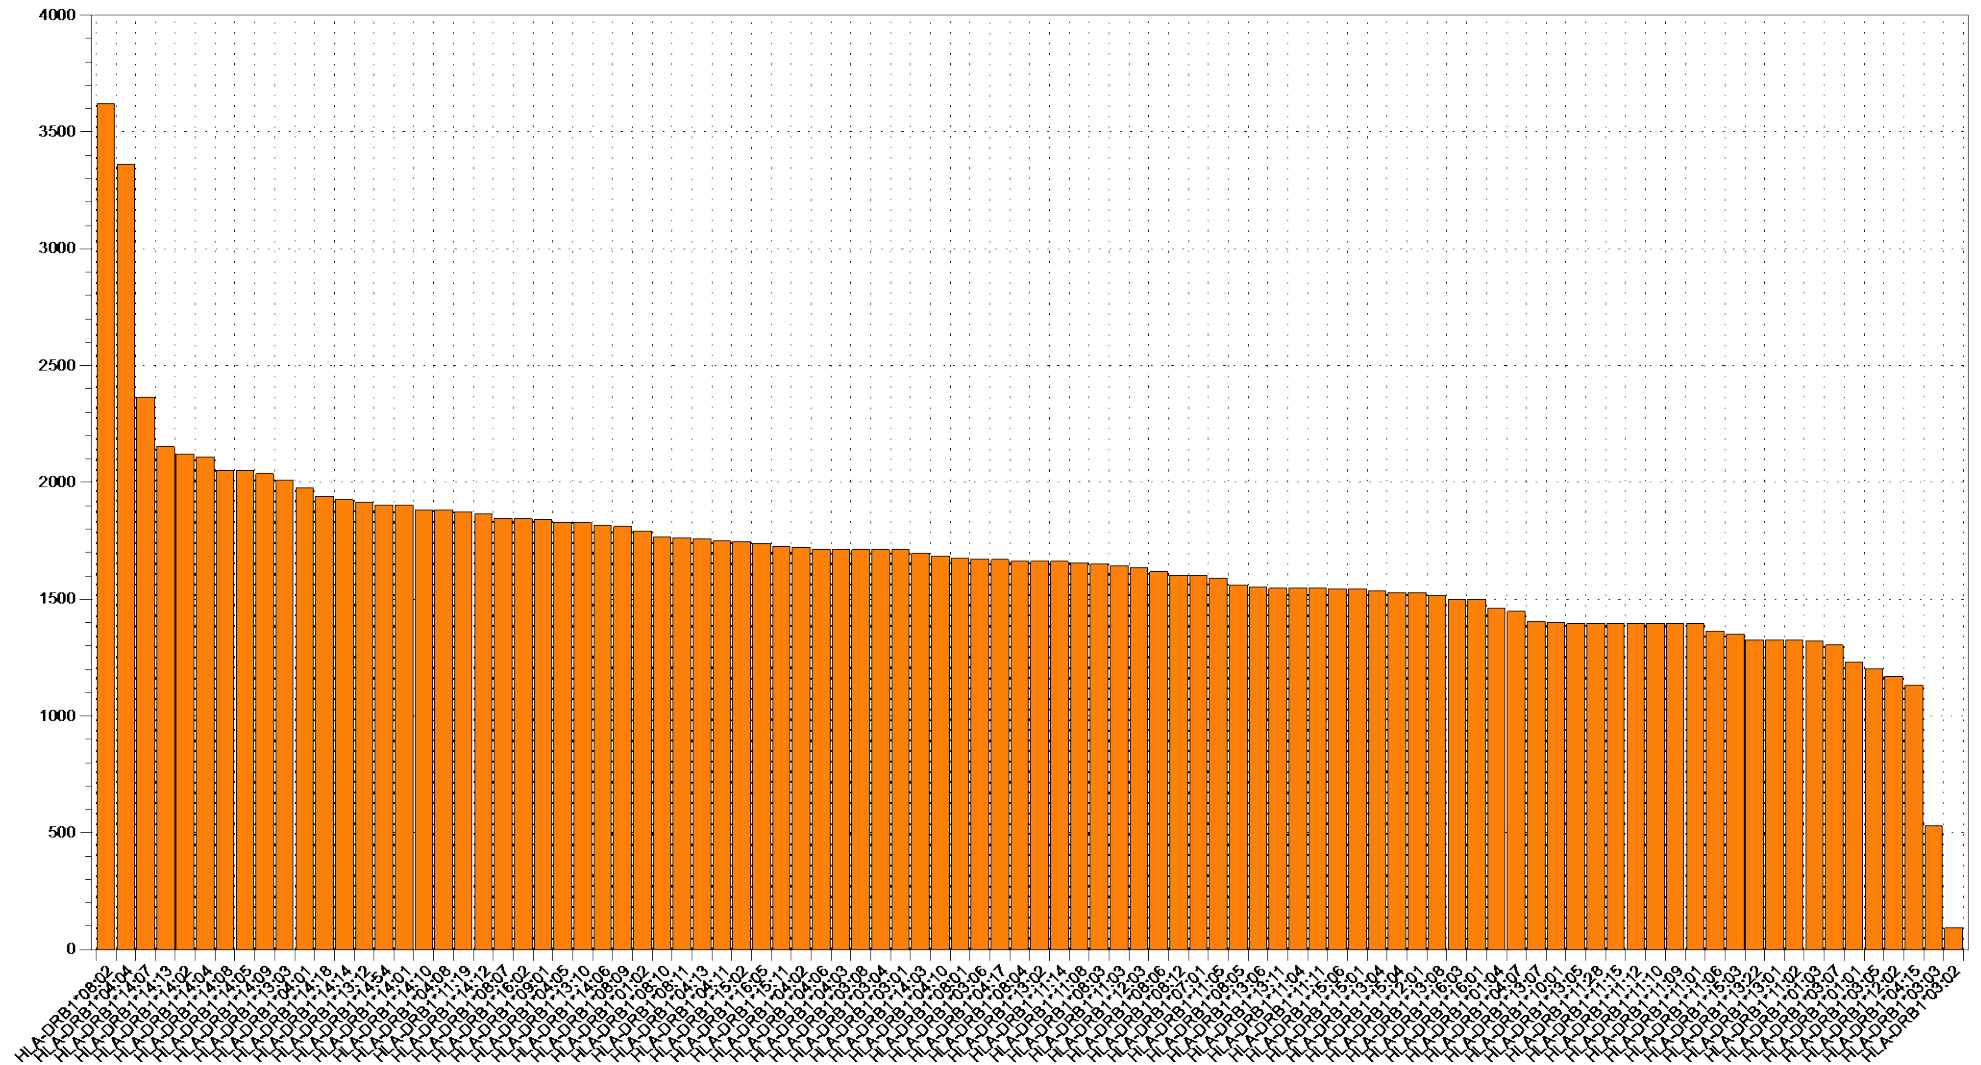

Alleles are ordered on the x-axis by their weak ( $1000 \text{ nM} < IC_{50} \leq 5000 \text{ nM}$ ) binding prediction and the number of peptides presented are displayed on the y-axis.

**Total number of peptides with strong, regular and weak binding predictions for *HLA-DQA1/-DQB1***

|                           | <b>IC<sub>50</sub> ≤ 50 nM<br/>Strong binders</b> | <b>50 nM &lt; IC<sub>50</sub> ≤ 1000 nM<br/>Regular binders</b> | <b>1000 nM &lt; IC<sub>50</sub> ≤ 5000 nM<br/>Weak binders</b> | <b>IC<sub>50</sub> &gt; 5000 nM<br/>Non binders</b> |
|---------------------------|---------------------------------------------------|-----------------------------------------------------------------|----------------------------------------------------------------|-----------------------------------------------------|
| HLA-DQA1*05:01/DQB1*02:01 | 0                                                 | 440                                                             | 1722                                                           | 2245                                                |
| HLA-DQA1*02:01/DQB1*02:01 | 0                                                 | 76                                                              | 971                                                            | 3360                                                |
| HLA-DQA1*02:01/DQB1*02:02 | 0                                                 | 76                                                              | 971                                                            | 3360                                                |
| HLA-DQA1*05:01/DQB1*02:03 | 0                                                 | 381                                                             | 2186                                                           | 1840                                                |
| HLA-DQA1*05:01/DQB1*03:01 | 3                                                 | 652                                                             | 1890                                                           | 1862                                                |
| HLA-DQA1*03:01/DQB1*03:02 | 0                                                 | 68                                                              | 1513                                                           | 2826                                                |
| HLA-DQA1*02:01/DQB1*03:03 | 0                                                 | 735                                                             | 1873                                                           | 1799                                                |
| HLA-DQA1*03:01/DQB1*03:03 | 0                                                 | 126                                                             | 1711                                                           | 2570                                                |
| HLA-DQA1*03:02/DQB1*03:03 | 0                                                 | 126                                                             | 1711                                                           | 2570                                                |
| HLA-DQA1*03:01/DQB1*03:04 | 0                                                 | 259                                                             | 2322                                                           | 1826                                                |
| HLA-DQA1*03:01/DQB1*03:05 | 0                                                 | 99                                                              | 2361                                                           | 1947                                                |
| HLA-DQA1*05:01/DQB1*03:05 | 0                                                 | 782                                                             | 2654                                                           | 971                                                 |
| HLA-DQA1*03:01/DQB1*03:07 | 0                                                 | 68                                                              | 1513                                                           | 2826                                                |
| HLA-DQA1*01:03/DQB1*03:19 | 0                                                 | 806                                                             | 2172                                                           | 1429                                                |
| HLA-DQA1*01:05/DQB1*03:19 | 0                                                 | 103                                                             | 1635                                                           | 2669                                                |
| HLA-DQA1*05:05/DQB1*03:19 | 3                                                 | 652                                                             | 1890                                                           | 1862                                                |
| HLA-DQA1*03:01/DQB1*04:01 | 0                                                 | 53                                                              | 1278                                                           | 3076                                                |
| HLA-DQA1*03:03/DQB1*04:01 | 0                                                 | 53                                                              | 1278                                                           | 3076                                                |
| HLA-DQA1*04:01/DQB1*04:01 | 0                                                 | 92                                                              | 1637                                                           | 2678                                                |
| HLA-DQA1*04:01/DQB1*04:02 | 0                                                 | 92                                                              | 1637                                                           | 2678                                                |
| HLA-DQA1*01:01/DQB1*05:01 | 0                                                 | 110                                                             | 819                                                            | 3478                                                |
| HLA-DQA1*01:02/DQB1*05:02 | 0                                                 | 83                                                              | 960                                                            | 3364                                                |
| HLA-DQA1*01:01/DQB1*05:03 | 0                                                 | 12                                                              | 604                                                            | 3791                                                |
| HLA-DQA1*01:03/DQB1*06:01 | 0                                                 | 277                                                             | 2128                                                           | 2002                                                |
| HLA-DQA1*01:02/DQB1*06:02 | 0                                                 | 329                                                             | 1998                                                           | 2080                                                |
| HLA-DQA1*01:03/DQB1*06:02 | 0                                                 | 451                                                             | 2011                                                           | 1945                                                |
| HLA-DQA1*01:02/DQB1*06:03 | 0                                                 | 0                                                               | 482                                                            | 3925                                                |
| HLA-DQA1*01:03/DQB1*06:03 | 0                                                 | 6                                                               | 542                                                            | 3859                                                |
| HLA-DQA1*01:02/DQB1*06:08 | 0                                                 | 7                                                               | 872                                                            | 3528                                                |
| HLA-DQA1*01:02/DQB1*06:09 | 0                                                 | 0                                                               | 15                                                             | 4392                                                |
| HLA-DQA1*01:02/DQB1*06:10 | 0                                                 | 12                                                              | 1392                                                           | 3003                                                |
| HLA-DQA1*01:02/DQB1*06:11 | 0                                                 | 174                                                             | 1664                                                           | 2569                                                |
| HLA-DQA1*01:03/DQB1*06:11 | 0                                                 | 307                                                             | 1840                                                           | 2260                                                |
| HLA-DQA1*01:02/DQB1*06:14 | 0                                                 | 2                                                               | 725                                                            | 3680                                                |

Allele combinations are ordered alphabetically.

## General binding prediction tendencies for *HLA-DQA1/DQB1*

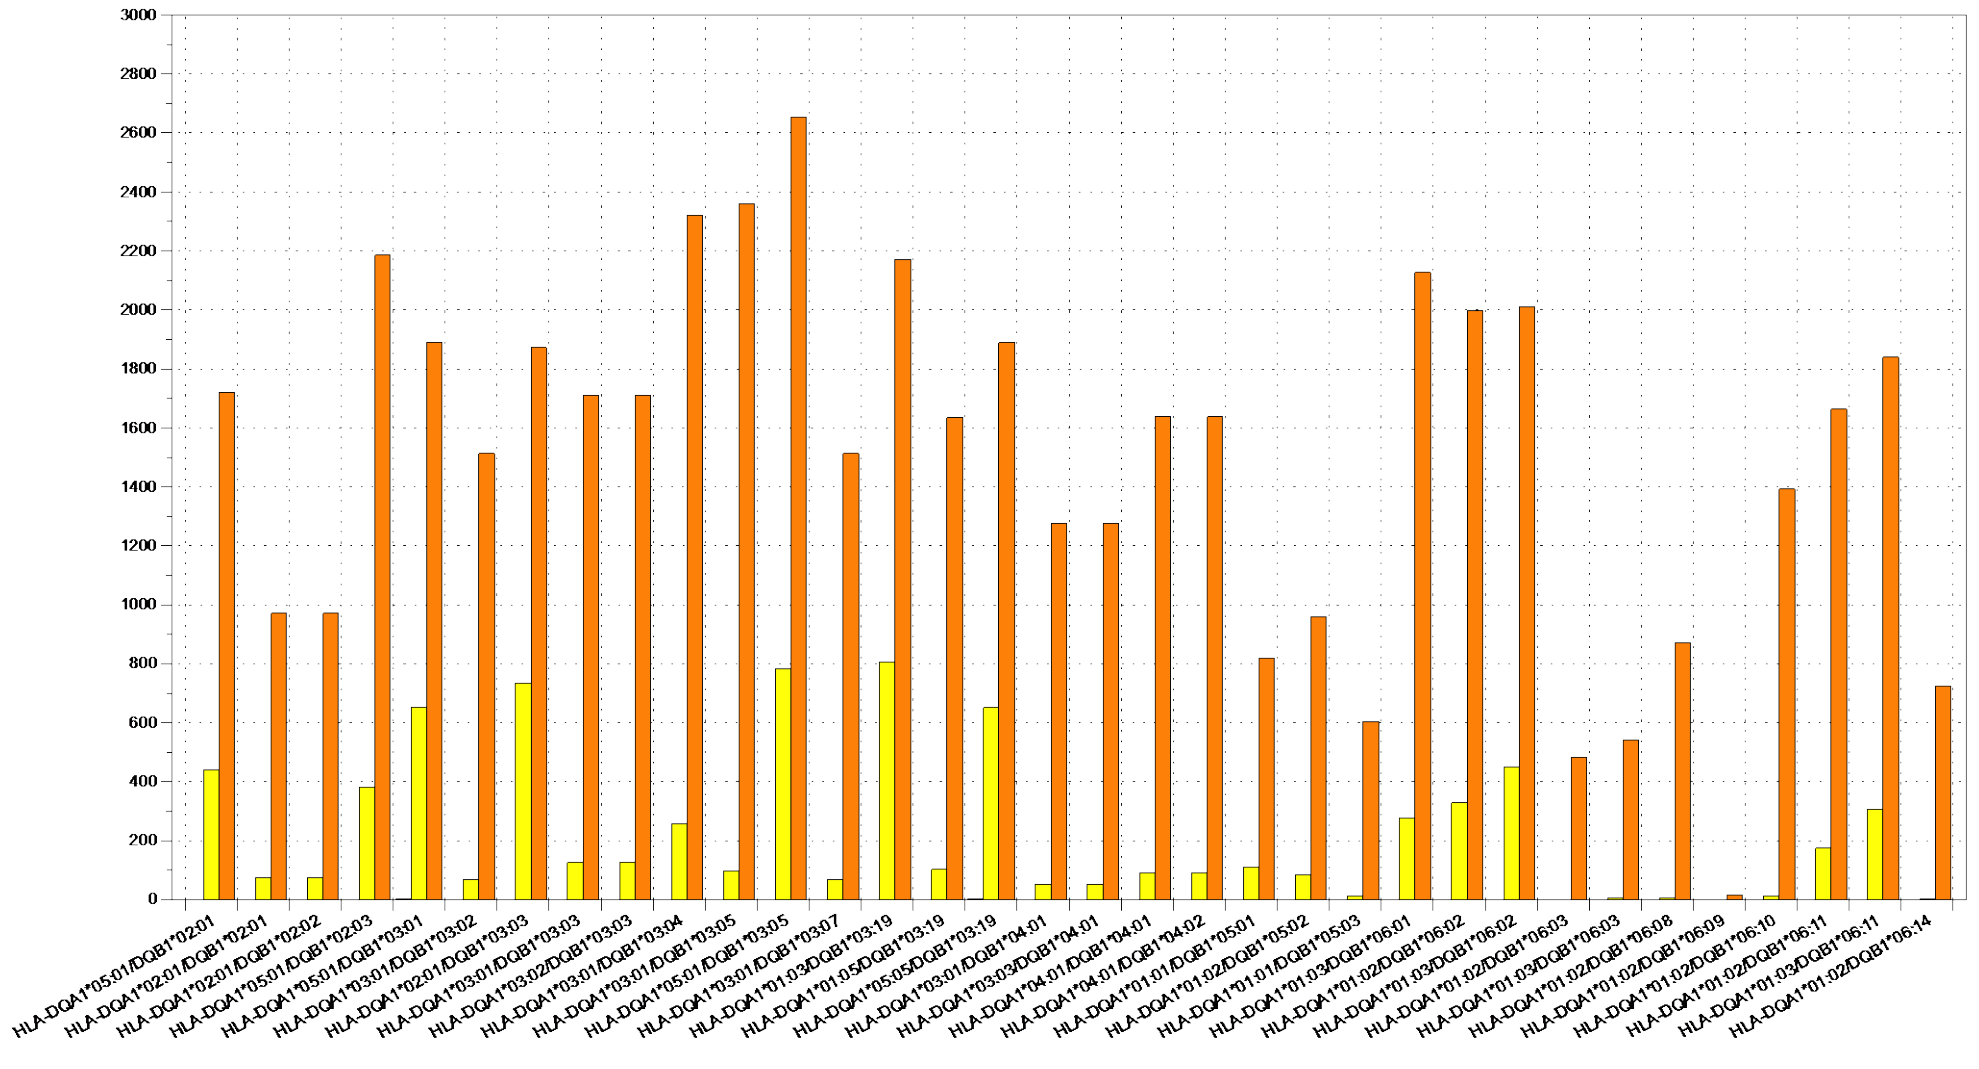

Allele combinations are ordered alphabetically on the x-axis, while the number of peptides binding with strong ( $IC_{50} \leq 50$  nM), regular ( $50$  nM  $< IC_{50} \leq 1000$  nM) and weak ( $1000$  nM  $< IC_{50} \leq 5000$  nM) binding prediction are displayed on the y-axis.

## HLA-DQA1/-DQB1 alleles ordered by number of presented peptides with strong binding prediction

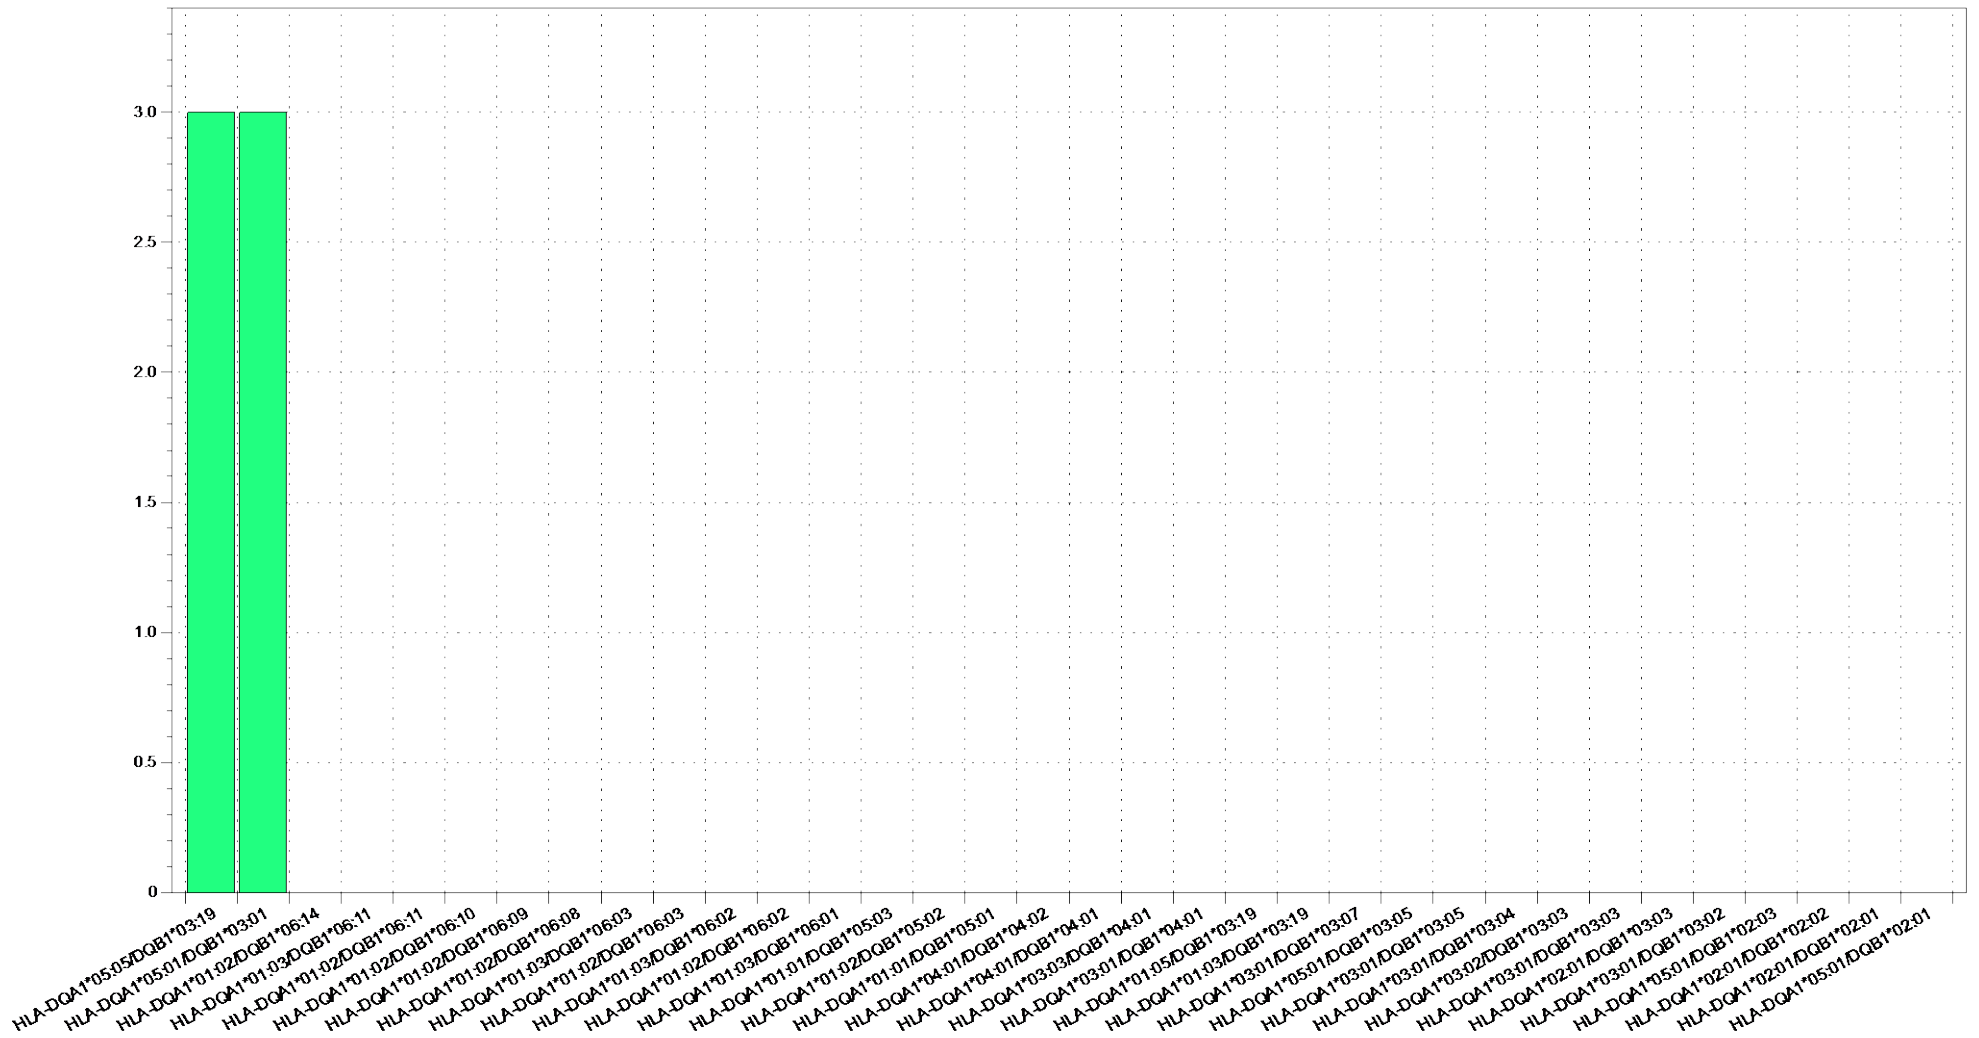

Allele combinations are ordered on the x-axis by their strong ( $IC_{50} \leq 50$  nM) binding prediction and the number of peptides presented are displayed on the y-axis.

## HLA-DQA1/-DQB1 alleles ordered by number of presented peptides with regular binding prediction

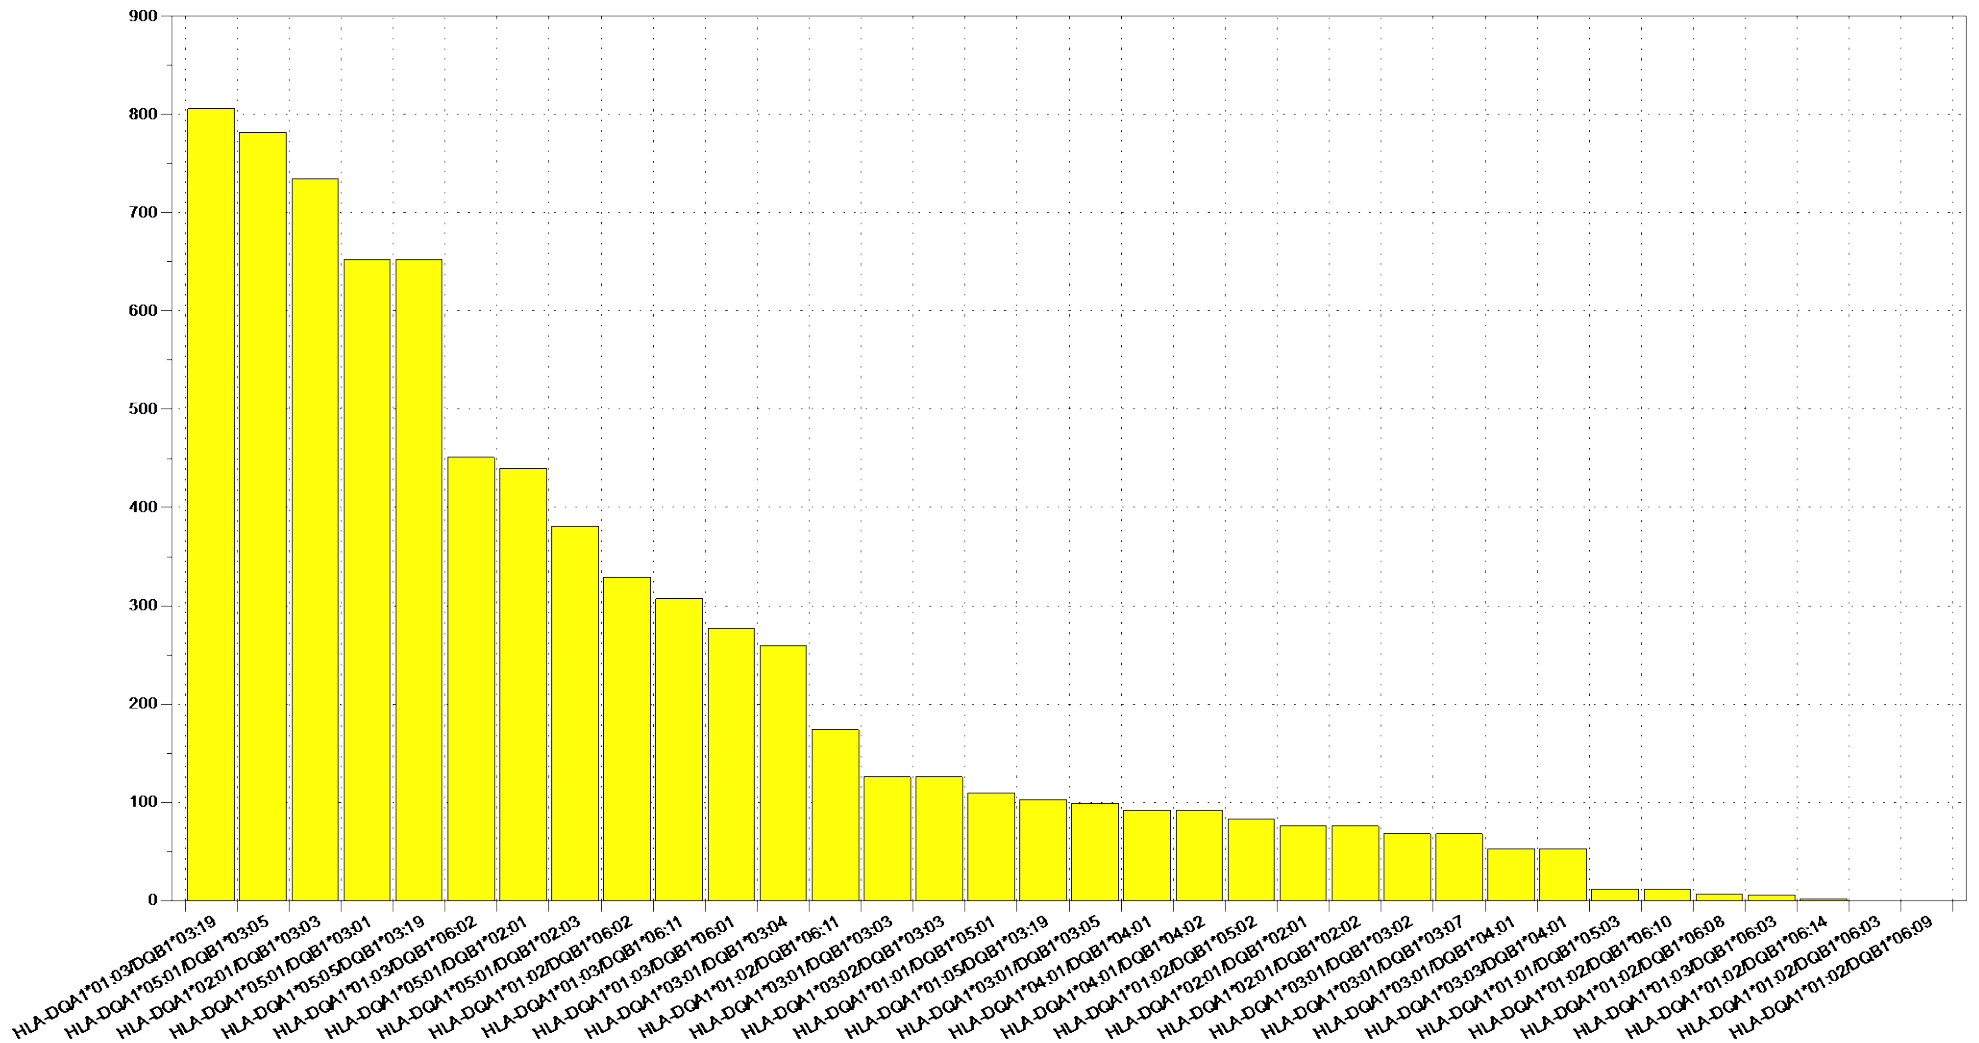

Allele combinations are ordered on the x-axis by their regular ( $50 \text{ nM} < IC_{50} \leq 1000 \text{ nM}$ ) binding prediction and the number of peptides presented are displayed on the y-axis.

## HLA-DQA1/DQB1 alleles ordered by number of presented peptides with weak binding prediction

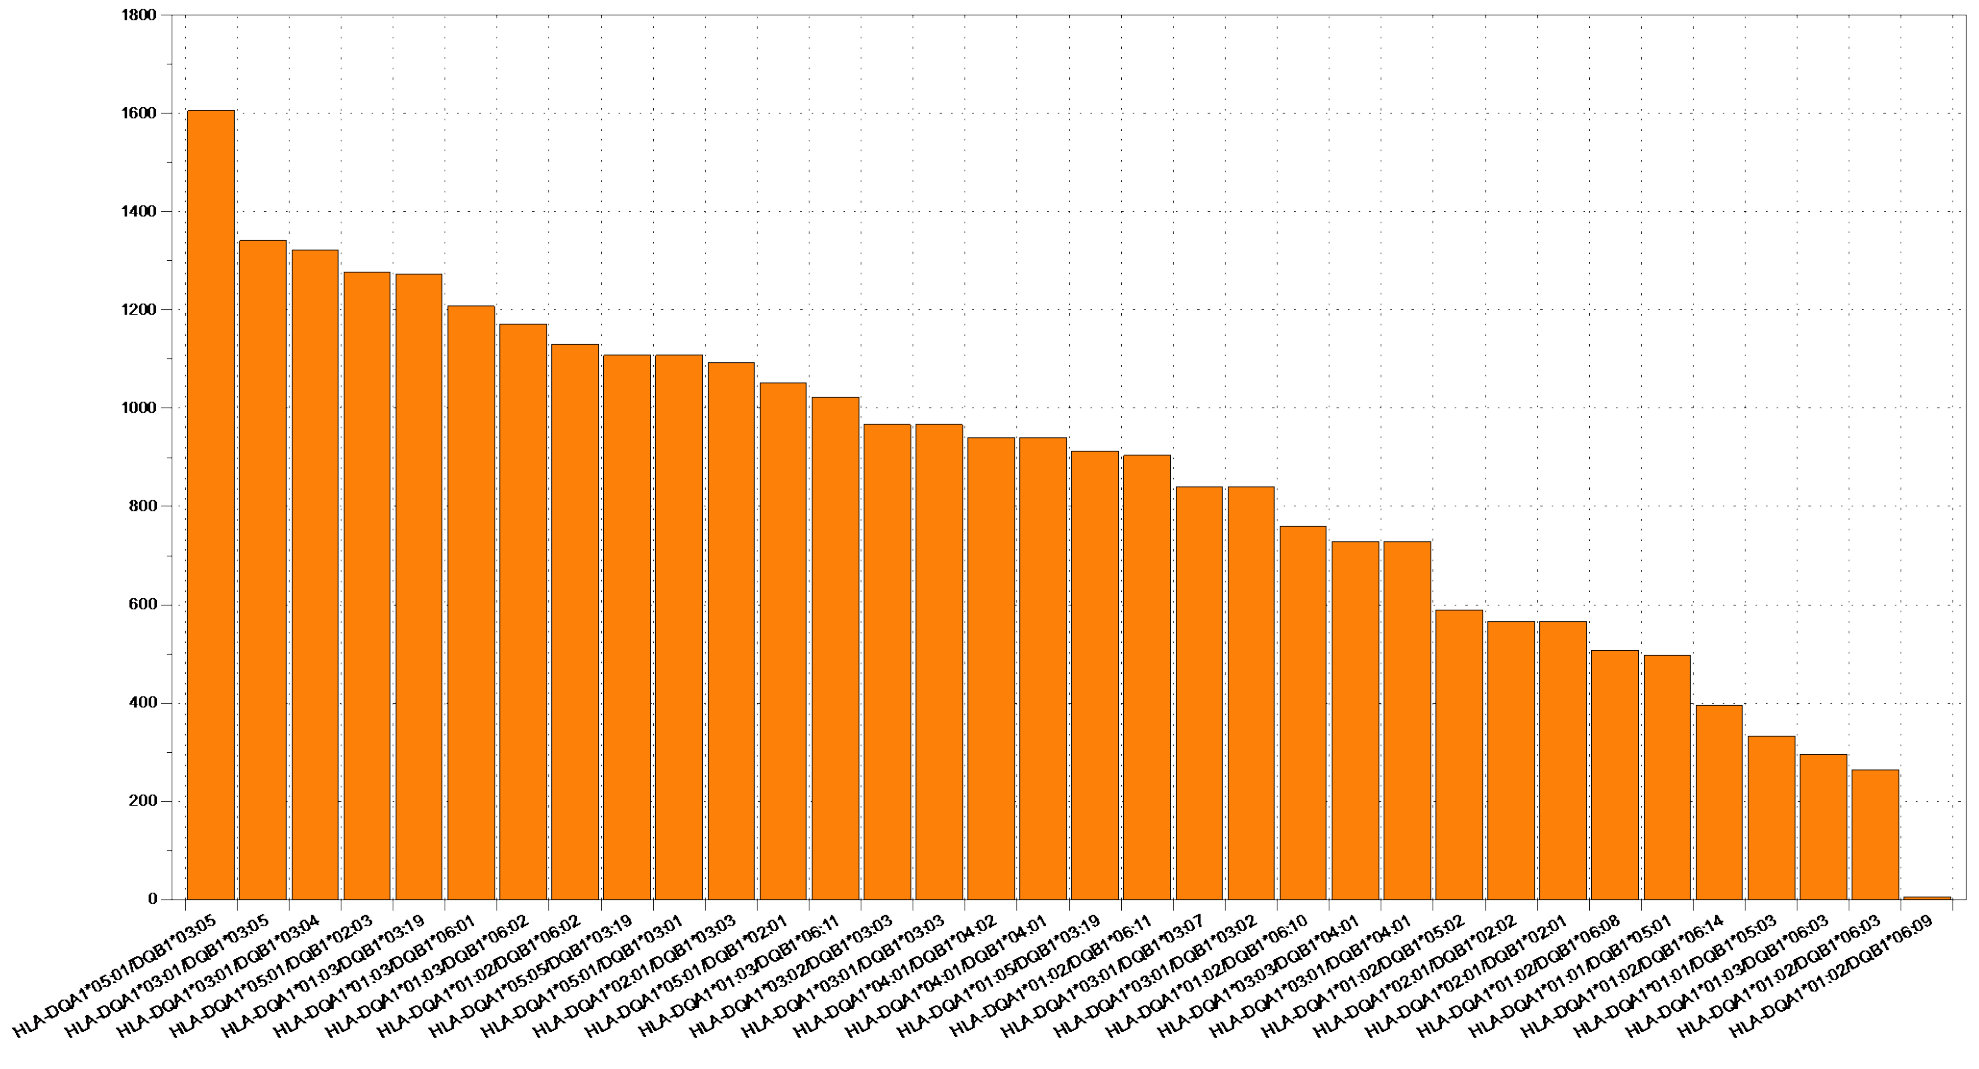

Allele combinations are ordered on the x-axis by their weak ( $1000 \text{ nM} < IC_{50} \leq 5000 \text{ nM}$ ) binding prediction and the number of peptides presented are displayed on the y-axis.
