# Supplementary material
Source: PubMed Central journal article supplement (PMC7300650)
Supplement: TAN-96-277-s003.pdf [file TAN-96-277-s003.pdf]

# Binding affinities of 438 HLA Class I and II proteins to the complete proteomes of seven (potentially) pandemic viruses and distributions of strongest and weakest HLA peptide binders in human populations worldwide

## Supplementary material 7

### Extended results for the binding predictions for HIV

#### Table of Contents

|                                                                                                            |    |
|------------------------------------------------------------------------------------------------------------|----|
| TOTAL NUMBER OF PEPTIDES WITH STRONG, REGULAR AND WEAK BINDING PREDICTIONS FOR <i>HLA-A</i> .....          | 2  |
| GENERAL BINDING PREDICTION TENDENCIES FOR <i>HLA-A</i> .....                                               | 4  |
| <i>HLA-A</i> ALLELES ORDERED BY NUMBER OF PRESENTED PEPTIDES WITH STRONG BINDING PREDICTION .....          | 5  |
| <i>HLA-A</i> ALLELES ORDERED BY NUMBER OF PRESENTED PEPTIDES WITH REGULAR BINDING PREDICTION.....          | 6  |
| <i>HLA-A</i> ALLELES ORDERED BY NUMBER OF PRESENTED PEPTIDES WITH WEAK BINDING PREDICTION.....             | 7  |
| TOTAL NUMBER OF PEPTIDES WITH STRONG, REGULAR AND WEAK BINDING PREDICTIONS FOR <i>HLA-B</i> .....          | 8  |
| GENERAL BINDING PREDICTION TENDENCIES FOR <i>HLA-B</i> .....                                               | 11 |
| <i>HLA-B</i> ALLELES ORDERED BY NUMBER OF PRESENTED PEPTIDES WITH STRONG BINDING PREDICTION .....          | 12 |
| <i>HLA-B</i> ALLELES ORDERED BY NUMBER OF PRESENTED PEPTIDES WITH REGULAR BINDING PREDICTION.....          | 13 |
| <i>HLA-B</i> ALLELES ORDERED BY NUMBER OF PRESENTED PEPTIDES WITH WEAK BINDING PREDICTION.....             | 14 |
| TOTAL NUMBER OF PEPTIDES WITH STRONG, REGULAR AND WEAK BINDING PREDICTIONS FOR <i>HLA-C</i> .....          | 15 |
| GENERAL BINDING PREDICTION TENDENCIES FOR <i>HLA-C</i> .....                                               | 16 |
| <i>HLA-C</i> ALLELES ORDERED BY NUMBER OF PRESENTED PEPTIDES WITH STRONG BINDING PREDICTION .....          | 17 |
| <i>HLA-C</i> ALLELES ORDERED BY NUMBER OF PRESENTED PEPTIDES WITH REGULAR BINDING PREDICTION.....          | 18 |
| <i>HLA-C</i> ALLELES ORDERED BY NUMBER OF PRESENTED PEPTIDES WITH WEAK BINDING PREDICTION .....            | 19 |
| TOTAL NUMBER OF PEPTIDES WITH STRONG, REGULAR AND WEAK BINDING PREDICTIONS FOR <i>HLA-DRB1</i> .....       | 20 |
| GENERAL BINDING PREDICTION TENDENCIES FOR <i>HLA-DRB1</i> .....                                            | 22 |
| <i>HLA-DRB1</i> ALLELES ORDERED BY NUMBER OF PRESENTED PEPTIDES WITH STRONG BINDING PREDICTION .....       | 23 |
| <i>HLA-DRB1</i> ALLELES ORDERED BY NUMBER OF PRESENTED PEPTIDES WITH REGULAR BINDING PREDICTION .....      | 24 |
| <i>HLA-DRB1</i> ALLELES ORDERED BY NUMBER OF PRESENTED PEPTIDES WITH WEAK BINDING PREDICTION .....         | 25 |
| TOTAL NUMBER OF PEPTIDES WITH STRONG, REGULAR AND WEAK BINDING PREDICTIONS FOR <i>HLA-DQA1/-DQB1</i> ....  | 26 |
| GENERAL BINDING PREDICTION TENDENCIES FOR <i>HLA-DQA1/-DQB1</i> .....                                      | 27 |
| <i>HLA-DQA1/-DQB1</i> ALLELES ORDERED BY NUMBER OF PRESENTED PEPTIDES WITH STRONG BINDING PREDICTION ..... | 28 |
| <i>HLA-DQA1/-DQB1</i> ALLELES ORDERED BY NUMBER OF PRESENTED PEPTIDES WITH REGULAR BINDING PREDICTION....  | 29 |
| <i>HLA-DQA1/-DQB1</i> ALLELES ORDERED BY NUMBER OF PRESENTED PEPTIDES WITH WEAK BINDING PREDICTION .....   | 30 |

## Total number of peptides with strong, regular and weak binding predictions for *HLA-A*

|             | <b>IC<sub>50</sub> ≤ 50 nM</b><br>Strong binders | <b>50 nM &lt; IC<sub>50</sub> ≤ 500 nM</b><br>Regular binders | <b>500 nM &lt; IC<sub>50</sub> ≤ 5000 nM</b><br>Weak binders | <b>IC<sub>50</sub> &gt; 5000 nM</b><br>Non binders |
|-------------|--------------------------------------------------|---------------------------------------------------------------|--------------------------------------------------------------|----------------------------------------------------|
| HLA-A*01:01 | 1                                                | 5                                                             | 30                                                           | 2767                                               |
| HLA-A*01:02 | 0                                                | 5                                                             | 47                                                           | 2751                                               |
| HLA-A*01:03 | 1                                                | 4                                                             | 23                                                           | 2775                                               |
| HLA-A*01:06 | 1                                                | 4                                                             | 27                                                           | 2771                                               |
| HLA-A*02:01 | 23                                               | 61                                                            | 143                                                          | 2576                                               |
| HLA-A*02:02 | 36                                               | 91                                                            | 229                                                          | 2447                                               |
| HLA-A*02:03 | 37                                               | 107                                                           | 202                                                          | 2457                                               |
| HLA-A*02:04 | 3                                                | 29                                                            | 120                                                          | 2651                                               |
| HLA-A*02:05 | 20                                               | 95                                                            | 281                                                          | 2407                                               |
| HLA-A*02:06 | 35                                               | 99                                                            | 251                                                          | 2418                                               |
| HLA-A*02:07 | 0                                                | 2                                                             | 33                                                           | 2768                                               |
| HLA-A*02:08 | 9                                                | 75                                                            | 287                                                          | 2432                                               |
| HLA-A*02:09 | 23                                               | 61                                                            | 143                                                          | 2576                                               |
| HLA-A*02:10 | 8                                                | 35                                                            | 183                                                          | 2577                                               |
| HLA-A*02:11 | 80                                               | 106                                                           | 206                                                          | 2411                                               |
| HLA-A*02:12 | 28                                               | 61                                                            | 145                                                          | 2569                                               |
| HLA-A*02:14 | 18                                               | 88                                                            | 238                                                          | 2459                                               |
| HLA-A*02:17 | 1                                                | 15                                                            | 89                                                           | 2698                                               |
| HLA-A*02:19 | 13                                               | 40                                                            | 117                                                          | 2633                                               |
| HLA-A*02:20 | 10                                               | 60                                                            | 152                                                          | 2581                                               |
| HLA-A*02:22 | 53                                               | 98                                                            | 230                                                          | 2422                                               |
| HLA-A*02:24 | 23                                               | 61                                                            | 143                                                          | 2576                                               |
| HLA-A*02:26 | 18                                               | 70                                                            | 159                                                          | 2556                                               |
| HLA-A*02:34 | 11                                               | 56                                                            | 151                                                          | 2585                                               |
| HLA-A*02:35 | 19                                               | 84                                                            | 176                                                          | 2524                                               |
| HLA-A*02:36 | 7                                                | 42                                                            | 135                                                          | 2619                                               |
| HLA-A*02:40 | 23                                               | 61                                                            | 143                                                          | 2576                                               |
| HLA-A*03:01 | 6                                                | 37                                                            | 95                                                           | 2665                                               |
| HLA-A*03:02 | 9                                                | 39                                                            | 110                                                          | 2645                                               |
| HLA-A*03:05 | 6                                                | 37                                                            | 95                                                           | 2665                                               |
| HLA-A*03:08 | 1                                                | 33                                                            | 99                                                           | 2670                                               |
| HLA-A*11:01 | 17                                               | 47                                                            | 120                                                          | 2619                                               |
| HLA-A*11:02 | 17                                               | 47                                                            | 120                                                          | 2619                                               |
| HLA-A*11:03 | 8                                                | 63                                                            | 132                                                          | 2600                                               |
| HLA-A*11:04 | 12                                               | 61                                                            | 121                                                          | 2609                                               |
| HLA-A*11:06 | 5                                                | 45                                                            | 120                                                          | 2633                                               |
| HLA-A*11:12 | 17                                               | 47                                                            | 120                                                          | 2619                                               |
| HLA-A*23:01 | 4                                                | 38                                                            | 104                                                          | 2657                                               |
| HLA-A*23:03 | 4                                                | 38                                                            | 104                                                          | 2657                                               |
| HLA-A*23:04 | 28                                               | 67                                                            | 176                                                          | 2532                                               |
| HLA-A*24:02 | 3                                                | 27                                                            | 87                                                           | 2686                                               |
| HLA-A*24:03 | 24                                               | 62                                                            | 118                                                          | 2599                                               |
| HLA-A*24:04 | 0                                                | 17                                                            | 79                                                           | 2707                                               |
| HLA-A*24:05 | 3                                                | 27                                                            | 87                                                           | 2686                                               |
| HLA-A*24:06 | 3                                                | 20                                                            | 103                                                          | 2677                                               |
| HLA-A*24:07 | 2                                                | 15                                                            | 88                                                           | 2698                                               |
| HLA-A*24:08 | 0                                                | 18                                                            | 112                                                          | 2673                                               |
| HLA-A*24:10 | 21                                               | 59                                                            | 144                                                          | 2579                                               |
| HLA-A*24:13 | 4                                                | 38                                                            | 104                                                          | 2657                                               |
| HLA-A*24:20 | 3                                                | 27                                                            | 87                                                           | 2686                                               |
| HLA-A*24:21 | 3                                                | 27                                                            | 87                                                           | 2686                                               |
| HLA-A*24:23 | 24                                               | 62                                                            | 118                                                          | 2599                                               |
| HLA-A*25:01 | 1                                                | 1                                                             | 36                                                           | 2765                                               |
| HLA-A*25:02 | 0                                                | 2                                                             | 33                                                           | 2768                                               |
| HLA-A*26:01 | 2                                                | 6                                                             | 51                                                           | 2744                                               |
| HLA-A*26:02 | 9                                                | 42                                                            | 155                                                          | 2597                                               |
| HLA-A*26:03 | 1                                                | 9                                                             | 77                                                           | 2716                                               |
| HLA-A*26:05 | 2                                                | 5                                                             | 53                                                           | 2743                                               |
| HLA-A*26:08 | 0                                                | 9                                                             | 91                                                           | 2703                                               |
| HLA-A*26:12 | 2                                                | 8                                                             | 72                                                           | 2721                                               |
| HLA-A*26:18 | 2                                                | 8                                                             | 72                                                           | 2721                                               |
| HLA-A*29:01 | 6                                                | 26                                                            | 89                                                           | 2682                                               |

|             | <b>IC<sub>50</sub> ≤ 50 nM</b><br><b>Strong binders</b> | <b>50 nM &lt; IC<sub>50</sub> ≤ 500 nM</b><br><b>Regular binders</b> | <b>500 nM &lt; IC<sub>50</sub> ≤ 5000 nM</b><br><b>Weak binders</b> | <b>IC<sub>50</sub> &gt; 5000 nM</b><br><b>Non binders</b> |
|-------------|---------------------------------------------------------|----------------------------------------------------------------------|---------------------------------------------------------------------|-----------------------------------------------------------|
| HLA-A*29:02 | 6                                                       | 26                                                                   | 89                                                                  | 2682                                                      |
| HLA-A*30:01 | 24                                                      | 111                                                                  | 407                                                                 | 2261                                                      |
| HLA-A*30:02 | 8                                                       | 29                                                                   | 114                                                                 | 2652                                                      |
| HLA-A*30:04 | 0                                                       | 14                                                                   | 182                                                                 | 2607                                                      |
| HLA-A*30:08 | 1                                                       | 19                                                                   | 164                                                                 | 2619                                                      |
| HLA-A*31:01 | 30                                                      | 54                                                                   | 179                                                                 | 2540                                                      |
| HLA-A*31:02 | 22                                                      | 63                                                                   | 180                                                                 | 2538                                                      |
| HLA-A*31:04 | 37                                                      | 81                                                                   | 210                                                                 | 2475                                                      |
| HLA-A*31:08 | 8                                                       | 74                                                                   | 244                                                                 | 2477                                                      |
| HLA-A*32:01 | 8                                                       | 57                                                                   | 181                                                                 | 2557                                                      |
| HLA-A*32:02 | 2                                                       | 39                                                                   | 144                                                                 | 2618                                                      |
| HLA-A*32:03 | 2                                                       | 33                                                                   | 135                                                                 | 2633                                                      |
| HLA-A*33:01 | 8                                                       | 33                                                                   | 91                                                                  | 2671                                                      |
| HLA-A*33:03 | 17                                                      | 44                                                                   | 103                                                                 | 2639                                                      |
| HLA-A*34:01 | 3                                                       | 16                                                                   | 188                                                                 | 2596                                                      |
| HLA-A*34:02 | 4                                                       | 47                                                                   | 145                                                                 | 2607                                                      |
| HLA-A*36:01 | 1                                                       | 6                                                                    | 62                                                                  | 2734                                                      |
| HLA-A*43:01 | 0                                                       | 3                                                                    | 74                                                                  | 2726                                                      |
| HLA-A*66:01 | 0                                                       | 10                                                                   | 112                                                                 | 2681                                                      |
| HLA-A*66:02 | 2                                                       | 19                                                                   | 166                                                                 | 2616                                                      |
| HLA-A*66:03 | 1                                                       | 11                                                                   | 136                                                                 | 2655                                                      |
| HLA-A*68:01 | 20                                                      | 69                                                                   | 145                                                                 | 2569                                                      |
| HLA-A*68:02 | 23                                                      | 64                                                                   | 185                                                                 | 2531                                                      |
| HLA-A*68:03 | 11                                                      | 49                                                                   | 124                                                                 | 2619                                                      |
| HLA-A*68:06 | 1                                                       | 20                                                                   | 160                                                                 | 2622                                                      |
| HLA-A*68:12 | 20                                                      | 69                                                                   | 145                                                                 | 2569                                                      |
| HLA-A*69:01 | 15                                                      | 50                                                                   | 163                                                                 | 2575                                                      |
| HLA-A*74:01 | 0                                                       | 17                                                                   | 77                                                                  | 2709                                                      |
| HLA-A*74:03 | 0                                                       | 17                                                                   | 77                                                                  | 2709                                                      |
| HLA-A*80:01 | 2                                                       | 6                                                                    | 36                                                                  | 2759                                                      |

Alleles are ordered alphabetically.

## General binding prediction tendencies for *HLA-A*

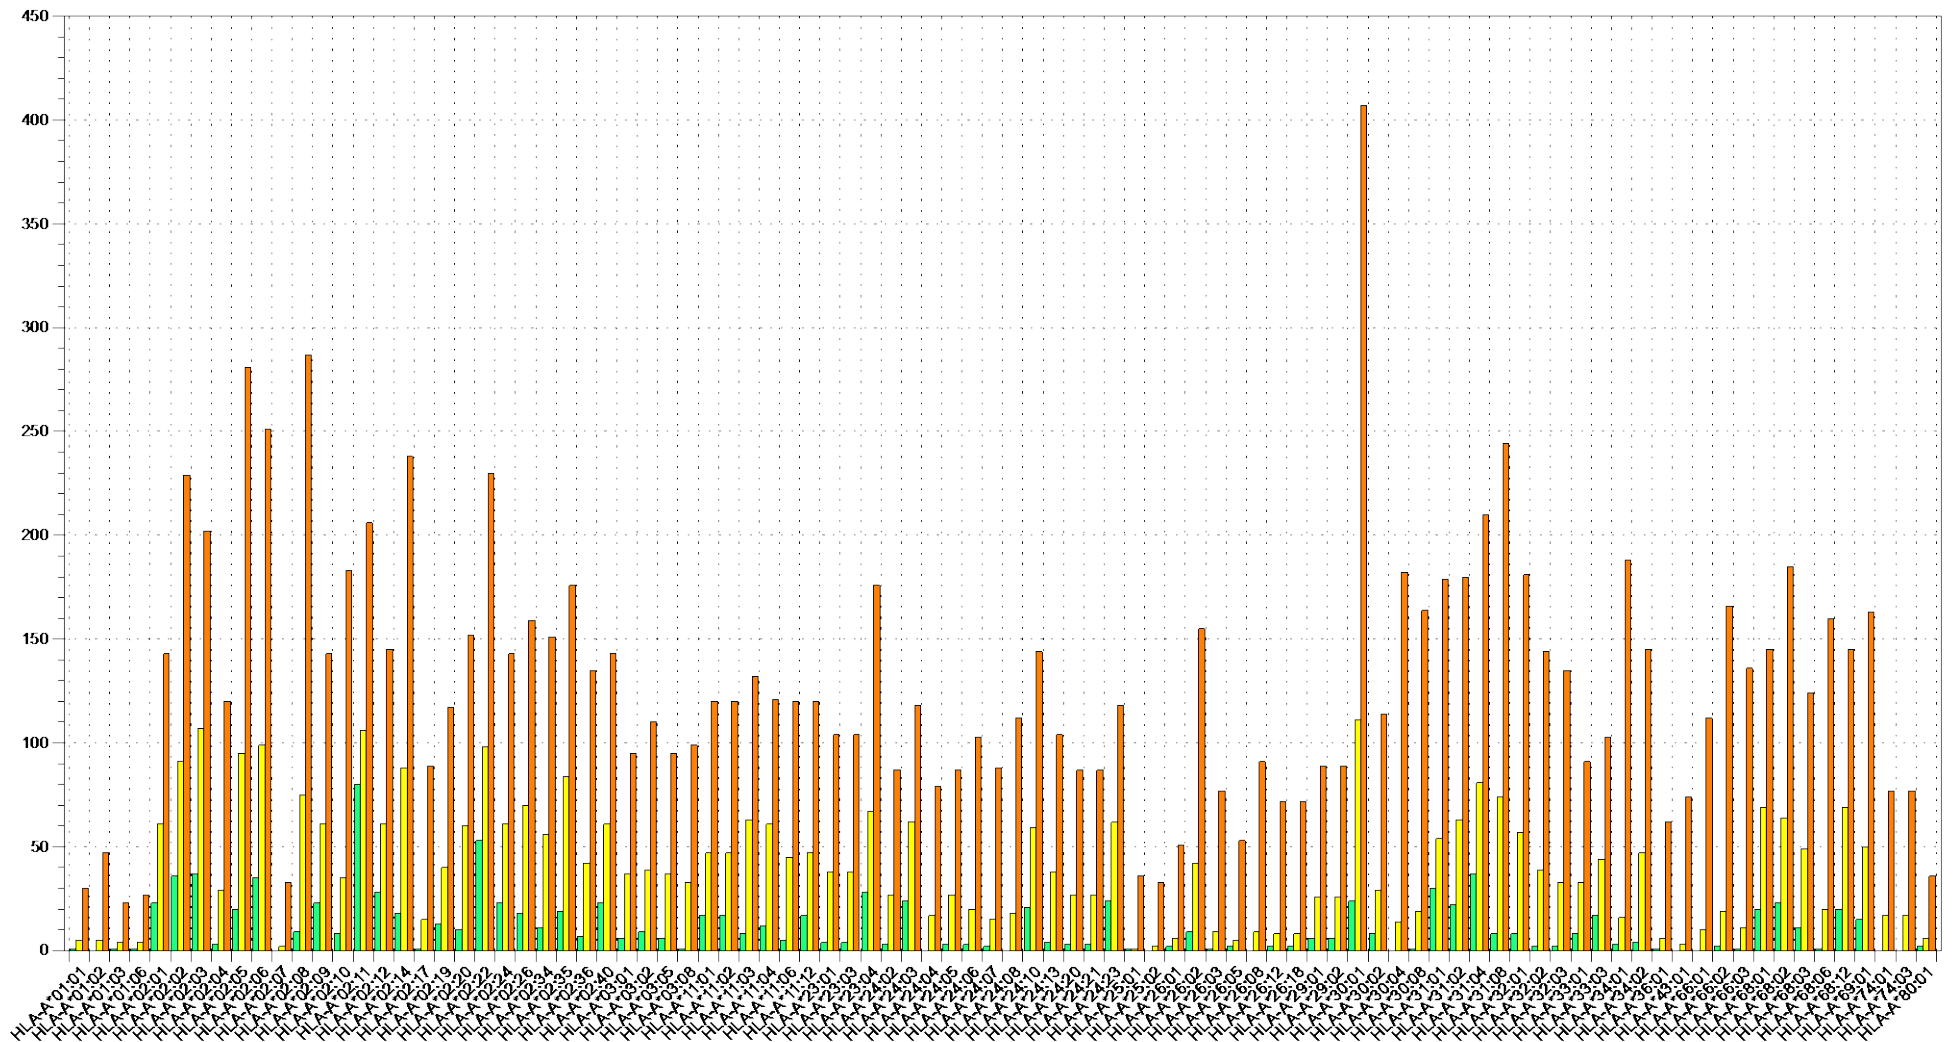

Alleles are ordered alphabetically on the x-axis, while the number of peptides binding with strong ( $IC_{50} \leq 50$  nM), regular ( $50$  nM  $< IC_{50} \leq 500$  nM) and weak ( $500$  nM  $< IC_{50} \leq 5000$  nM) binding prediction are displayed on the y-axis.

## HLA-A alleles ordered by number of presented peptides with strong binding prediction

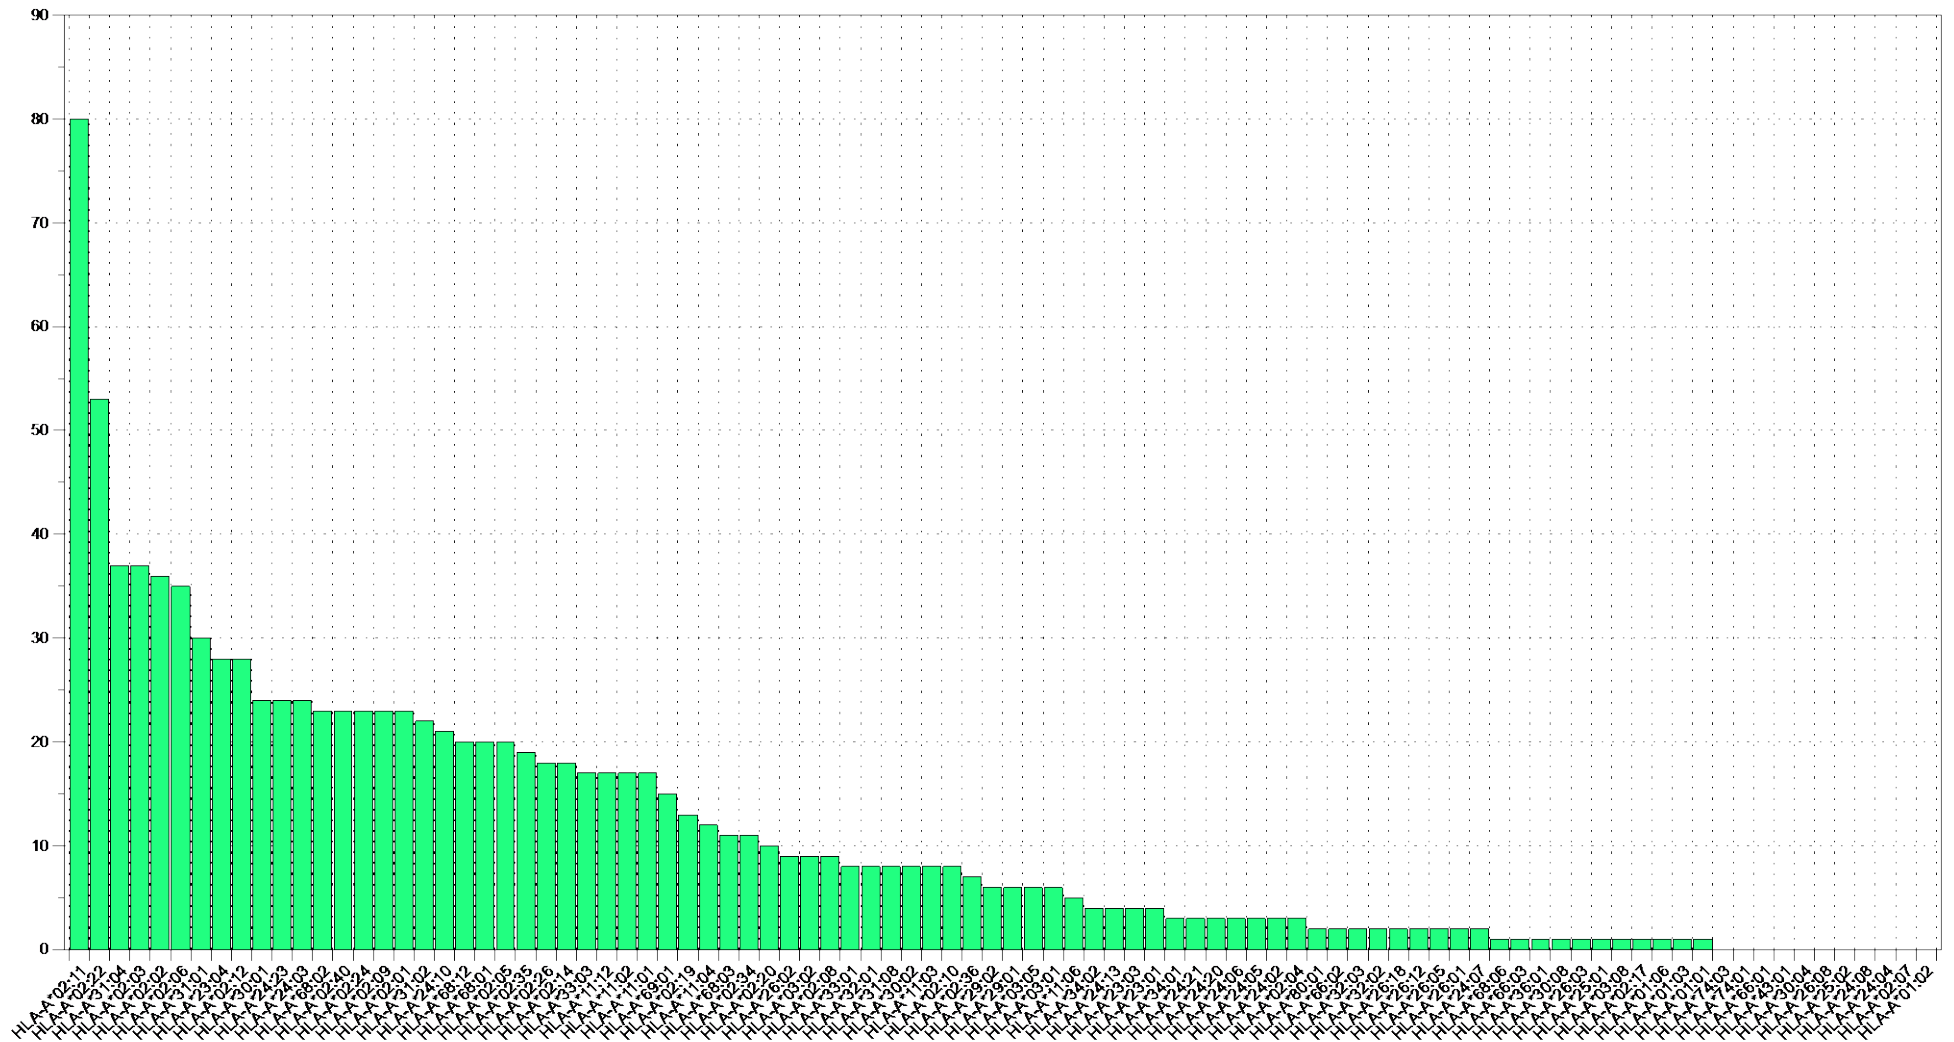

Alleles are ordered on the x-axis by their strong ( $IC_{50} \leq 50$  nM) binding prediction and the number of peptides presented are displayed on the y-axis.

## HLA-A alleles ordered by number of presented peptides with regular binding prediction

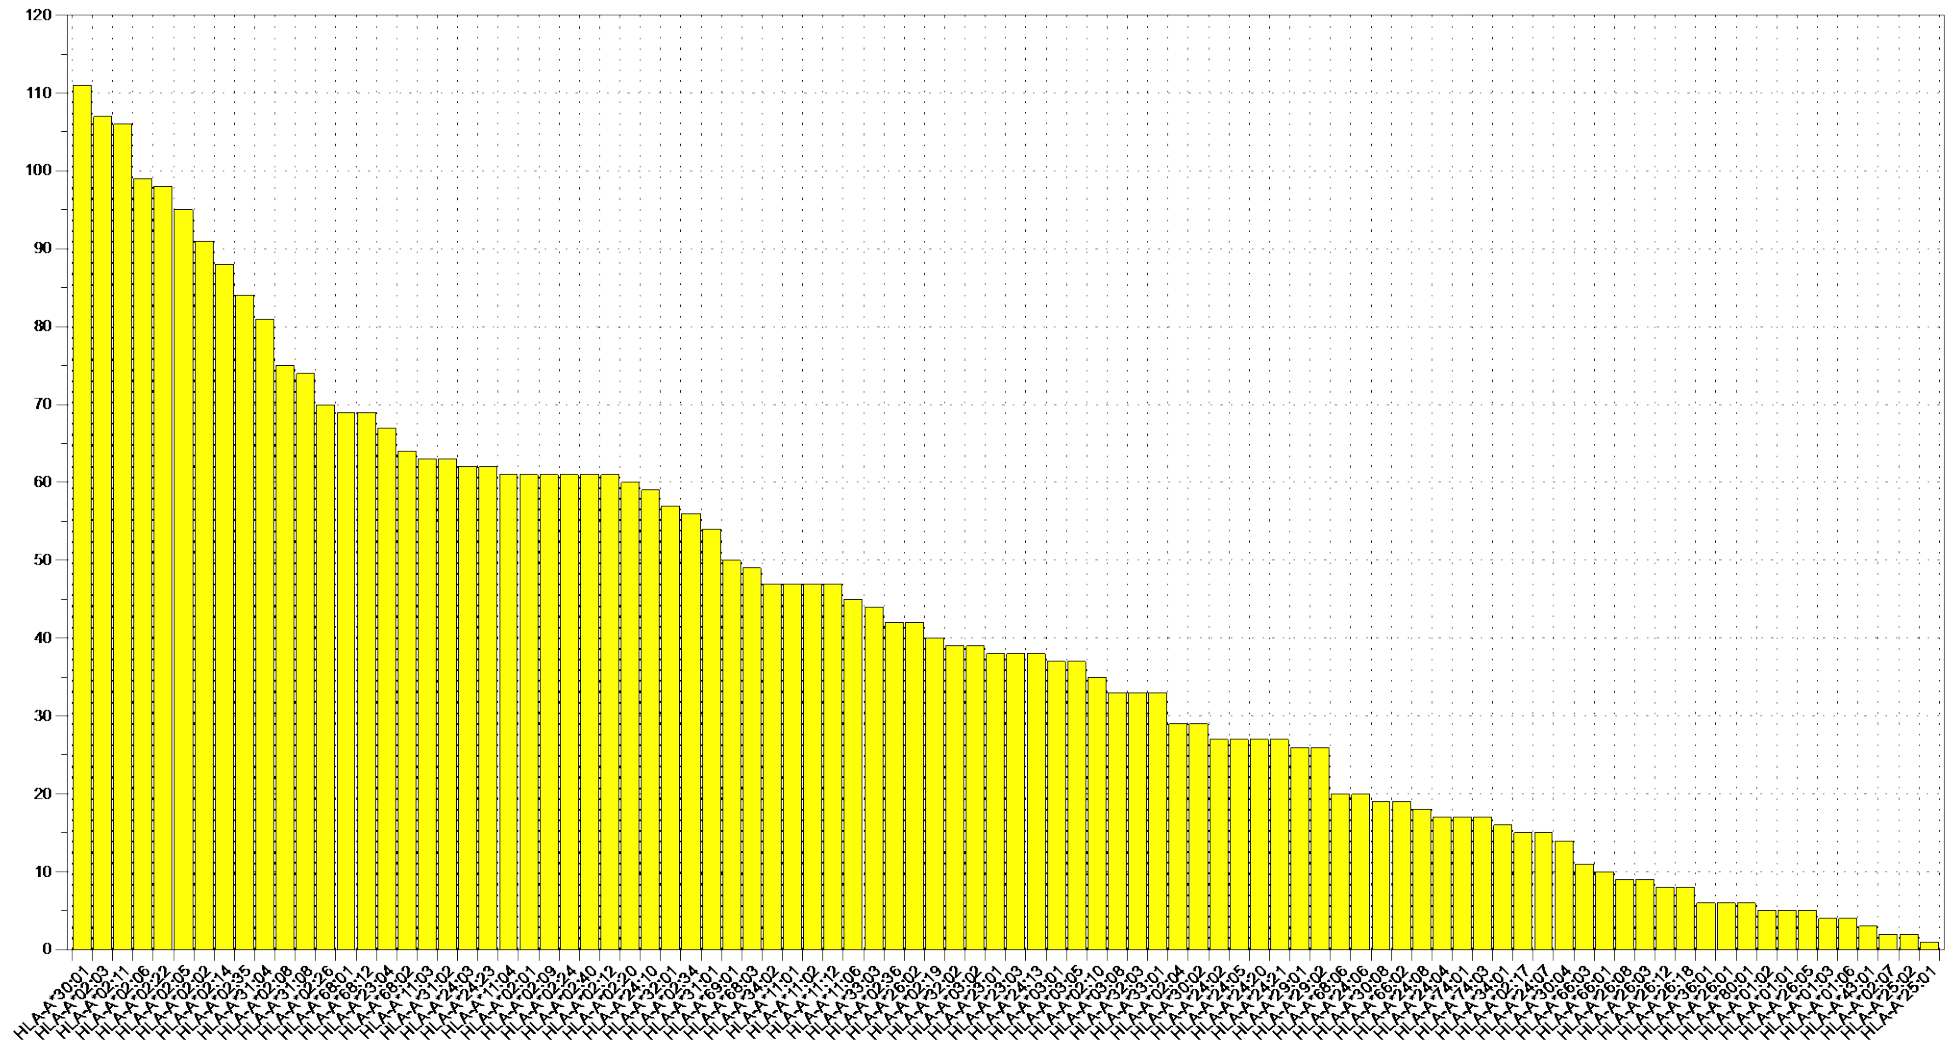

Alleles are ordered on the x-axis by their regular ( $50 \text{ nM} < IC_{50} \leq 500 \text{ nM}$ ) binding prediction and the number of peptides presented are displayed on the y-axis.



## Total number of peptides with strong, regular and weak binding predictions for *HLA-B*

|             | <b>IC<sub>50</sub> ≤ 50 nM</b><br>Strong binders | <b>50 nM &lt; IC<sub>50</sub> ≤ 500 nM</b><br>Regular binders | <b>500 nM &lt; IC<sub>50</sub> ≤ 5000 nM</b><br>Weak binders | <b>IC<sub>50</sub> &gt; 5000 nM</b><br>Non binders |
|-------------|--------------------------------------------------|---------------------------------------------------------------|--------------------------------------------------------------|----------------------------------------------------|
| HLA-B*07:02 | 8                                                | 19                                                            | 72                                                           | 2704                                               |
| HLA-B*07:04 | 8                                                | 17                                                            | 92                                                           | 2686                                               |
| HLA-B*07:05 | 9                                                | 23                                                            | 101                                                          | 2670                                               |
| HLA-B*07:06 | 9                                                | 23                                                            | 101                                                          | 2670                                               |
| HLA-B*08:01 | 3                                                | 28                                                            | 151                                                          | 2621                                               |
| HLA-B*08:03 | 0                                                | 0                                                             | 10                                                           | 2793                                               |
| HLA-B*08:04 | 0                                                | 11                                                            | 161                                                          | 2631                                               |
| HLA-B*08:05 | 0                                                | 10                                                            | 123                                                          | 2670                                               |
| HLA-B*13:01 | 2                                                | 38                                                            | 193                                                          | 2570                                               |
| HLA-B*13:02 | 0                                                | 7                                                             | 112                                                          | 2684                                               |
| HLA-B*13:03 | 0                                                | 5                                                             | 129                                                          | 2669                                               |
| HLA-B*13:04 | 0                                                | 11                                                            | 173                                                          | 2619                                               |
| HLA-B*14:01 | 0                                                | 3                                                             | 54                                                           | 2746                                               |
| HLA-B*14:02 | 0                                                | 3                                                             | 54                                                           | 2746                                               |
| HLA-B*14:03 | 0                                                | 1                                                             | 66                                                           | 2736                                               |
| HLA-B*15:01 | 14                                               | 40                                                            | 204                                                          | 2545                                               |
| HLA-B*15:02 | 1                                                | 25                                                            | 143                                                          | 2634                                               |
| HLA-B*15:03 | 48                                               | 130                                                           | 393                                                          | 2232                                               |
| HLA-B*15:04 | 0                                                | 6                                                             | 171                                                          | 2626                                               |
| HLA-B*15:05 | 11                                               | 50                                                            | 241                                                          | 2501                                               |
| HLA-B*15:06 | 16                                               | 39                                                            | 200                                                          | 2548                                               |
| HLA-B*15:07 | 6                                                | 31                                                            | 193                                                          | 2573                                               |
| HLA-B*15:08 | 0                                                | 4                                                             | 65                                                           | 2734                                               |
| HLA-B*15:09 | 0                                                | 3                                                             | 27                                                           | 2773                                               |
| HLA-B*15:10 | 0                                                | 3                                                             | 28                                                           | 2772                                               |
| HLA-B*15:11 | 0                                                | 4                                                             | 69                                                           | 2730                                               |
| HLA-B*15:12 | 0                                                | 22                                                            | 90                                                           | 2691                                               |
| HLA-B*15:13 | 0                                                | 6                                                             | 133                                                          | 2664                                               |
| HLA-B*15:15 | 1                                                | 20                                                            | 125                                                          | 2657                                               |
| HLA-B*15:16 | 8                                                | 47                                                            | 213                                                          | 2535                                               |
| HLA-B*15:17 | 35                                               | 80                                                            | 192                                                          | 2496                                               |
| HLA-B*15:18 | 0                                                | 7                                                             | 103                                                          | 2693                                               |
| HLA-B*15:20 | 8                                                | 49                                                            | 230                                                          | 2516                                               |
| HLA-B*15:21 | 0                                                | 0                                                             | 61                                                           | 2742                                               |
| HLA-B*15:24 | 0                                                | 20                                                            | 163                                                          | 2620                                               |
| HLA-B*15:25 | 20                                               | 46                                                            | 242                                                          | 2495                                               |
| HLA-B*15:27 | 8                                                | 33                                                            | 153                                                          | 2609                                               |
| HLA-B*15:29 | 4                                                | 54                                                            | 265                                                          | 2480                                               |
| HLA-B*15:31 | 0                                                | 20                                                            | 164                                                          | 2619                                               |
| HLA-B*15:32 | 10                                               | 42                                                            | 249                                                          | 2502                                               |
| HLA-B*15:34 | 14                                               | 40                                                            | 204                                                          | 2545                                               |
| HLA-B*15:35 | 3                                                | 30                                                            | 176                                                          | 2594                                               |
| HLA-B*15:38 | 7                                                | 39                                                            | 218                                                          | 2539                                               |
| HLA-B*15:39 | 22                                               | 51                                                            | 258                                                          | 2472                                               |
| HLA-B*15:40 | 5                                                | 27                                                            | 152                                                          | 2619                                               |
| HLA-B*15:58 | 0                                                | 7                                                             | 99                                                           | 2697                                               |
| HLA-B*18:01 | 1                                                | 10                                                            | 71                                                           | 2721                                               |
| HLA-B*18:02 | 1                                                | 7                                                             | 117                                                          | 2678                                               |
| HLA-B*18:03 | 1                                                | 6                                                             | 91                                                           | 2705                                               |
| HLA-B*18:05 | 1                                                | 10                                                            | 71                                                           | 2721                                               |
| HLA-B*18:07 | 0                                                | 4                                                             | 56                                                           | 2743                                               |
| HLA-B*27:02 | 0                                                | 9                                                             | 39                                                           | 2755                                               |
| HLA-B*27:03 | 0                                                | 1                                                             | 43                                                           | 2759                                               |
| HLA-B*27:04 | 0                                                | 9                                                             | 57                                                           | 2737                                               |
| HLA-B*27:05 | 4                                                | 41                                                            | 127                                                          | 2631                                               |
| HLA-B*27:06 | 7                                                | 25                                                            | 111                                                          | 2660                                               |
| HLA-B*27:07 | 12                                               | 41                                                            | 170                                                          | 2580                                               |
| HLA-B*27:08 | 3                                                | 24                                                            | 135                                                          | 2641                                               |
| HLA-B*27:09 | 5                                                | 29                                                            | 145                                                          | 2624                                               |
| HLA-B*27:12 | 3                                                | 35                                                            | 183                                                          | 2582                                               |
| HLA-B*27:14 | 0                                                | 5                                                             | 76                                                           | 2722                                               |
| HLA-B*35:01 | 5                                                | 23                                                            | 124                                                          | 2651                                               |



|             | IC <sub>50</sub> ≤ 50 nM<br>Strong binders | 50 nM < IC <sub>50</sub> ≤ 500 nM<br>Regular binders | 500 nM < IC <sub>50</sub> ≤ 5000 nM<br>Weak binders | IC <sub>50</sub> > 5000 nM<br>Non binders |
|-------------|--------------------------------------------|------------------------------------------------------|-----------------------------------------------------|-------------------------------------------|
| HLA-B*35:02 | 0                                          | 6                                                    | 36                                                  | 2761                                      |
| HLA-B*35:03 | 0                                          | 4                                                    | 26                                                  | 2773                                      |
| HLA-B*35:04 | 0                                          | 6                                                    | 36                                                  | 2761                                      |
| HLA-B*35:05 | 1                                          | 26                                                   | 164                                                 | 2612                                      |
| HLA-B*35:06 | 0                                          | 2                                                    | 22                                                  | 2779                                      |
| HLA-B*35:08 | 0                                          | 9                                                    | 58                                                  | 2736                                      |
| HLA-B*35:09 | 0                                          | 6                                                    | 36                                                  | 2761                                      |
| HLA-B*35:10 | 11                                         | 73                                                   | 285                                                 | 2434                                      |
| HLA-B*35:11 | 3                                          | 30                                                   | 184                                                 | 2586                                      |
| HLA-B*35:12 | 0                                          | 6                                                    | 36                                                  | 2761                                      |
| HLA-B*35:17 | 1                                          | 22                                                   | 144                                                 | 2636                                      |
| HLA-B*35:19 | 7                                          | 36                                                   | 197                                                 | 2563                                      |
| HLA-B*35:20 | 0                                          | 25                                                   | 179                                                 | 2599                                      |
| HLA-B*35:21 | 1                                          | 23                                                   | 189                                                 | 2590                                      |
| HLA-B*35:32 | 5                                          | 26                                                   | 143                                                 | 2629                                      |
| HLA-B*35:43 | 0                                          | 17                                                   | 133                                                 | 2653                                      |
| HLA-B*37:01 | 0                                          | 5                                                    | 73                                                  | 2725                                      |
| HLA-B*38:01 | 0                                          | 5                                                    | 68                                                  | 2730                                      |
| HLA-B*38:02 | 0                                          | 7                                                    | 71                                                  | 2725                                      |
| HLA-B*39:01 | 4                                          | 22                                                   | 126                                                 | 2651                                      |
| HLA-B*39:02 | 10                                         | 71                                                   | 284                                                 | 2438                                      |
| HLA-B*39:03 | 3                                          | 26                                                   | 140                                                 | 2634                                      |
| HLA-B*39:04 | 4                                          | 22                                                   | 126                                                 | 2651                                      |
| HLA-B*39:05 | 1                                          | 6                                                    | 54                                                  | 2742                                      |
| HLA-B*39:06 | 1                                          | 8                                                    | 74                                                  | 2720                                      |
| HLA-B*39:07 | 0                                          | 22                                                   | 156                                                 | 2625                                      |
| HLA-B*39:09 | 4                                          | 15                                                   | 152                                                 | 2632                                      |
| HLA-B*39:10 | 4                                          | 26                                                   | 160                                                 | 2613                                      |
| HLA-B*39:15 | 3                                          | 18                                                   | 119                                                 | 2663                                      |
| HLA-B*39:24 | 3                                          | 26                                                   | 140                                                 | 2634                                      |
| HLA-B*40:01 | 7                                          | 14                                                   | 58                                                  | 2724                                      |
| HLA-B*40:02 | 10                                         | 30                                                   | 115                                                 | 2648                                      |
| HLA-B*40:03 | 2                                          | 27                                                   | 158                                                 | 2616                                      |
| HLA-B*40:04 | 11                                         | 27                                                   | 93                                                  | 2672                                      |
| HLA-B*40:05 | 2                                          | 28                                                   | 144                                                 | 2629                                      |
| HLA-B*40:06 | 2                                          | 18                                                   | 60                                                  | 2723                                      |
| HLA-B*40:09 | 6                                          | 29                                                   | 102                                                 | 2666                                      |
| HLA-B*40:10 | 1                                          | 13                                                   | 52                                                  | 2737                                      |
| HLA-B*40:11 | 10                                         | 27                                                   | 92                                                  | 2674                                      |
| HLA-B*40:12 | 0                                          | 11                                                   | 55                                                  | 2737                                      |
| HLA-B*40:14 | 10                                         | 27                                                   | 92                                                  | 2674                                      |
| HLA-B*40:16 | 3                                          | 18                                                   | 106                                                 | 2676                                      |
| HLA-B*40:40 | 5                                          | 31                                                   | 131                                                 | 2636                                      |
| HLA-B*41:01 | 5                                          | 28                                                   | 77                                                  | 2693                                      |
| HLA-B*41:02 | 11                                         | 33                                                   | 131                                                 | 2628                                      |
| HLA-B*42:01 | 15                                         | 30                                                   | 171                                                 | 2587                                      |
| HLA-B*42:02 | 4                                          | 11                                                   | 98                                                  | 2690                                      |
| HLA-B*44:02 | 4                                          | 11                                                   | 59                                                  | 2729                                      |
| HLA-B*44:03 | 4                                          | 13                                                   | 56                                                  | 2730                                      |
| HLA-B*44:04 | 2                                          | 8                                                    | 41                                                  | 2752                                      |
| HLA-B*44:05 | 0                                          | 11                                                   | 32                                                  | 2760                                      |
| HLA-B*44:06 | 0                                          | 0                                                    | 15                                                  | 2788                                      |
| HLA-B*44:07 | 4                                          | 13                                                   | 56                                                  | 2730                                      |
| HLA-B*44:09 | 2                                          | 18                                                   | 126                                                 | 2657                                      |
| HLA-B*44:15 | 0                                          | 8                                                    | 45                                                  | 2750                                      |
| HLA-B*45:01 | 3                                          | 22                                                   | 68                                                  | 2710                                      |
| HLA-B*46:01 | 0                                          | 0                                                    | 13                                                  | 2790                                      |
| HLA-B*47:01 | 0                                          | 11                                                   | 188                                                 | 2604                                      |
| HLA-B*47:03 | 2                                          | 14                                                   | 138                                                 | 2649                                      |
| HLA-B*48:01 | 0                                          | 7                                                    | 51                                                  | 2745                                      |
| HLA-B*48:02 | 23                                         | 80                                                   | 331                                                 | 2369                                      |
| HLA-B*48:03 | 0                                          | 11                                                   | 55                                                  | 2737                                      |
| HLA-B*48:04 | 0                                          | 7                                                    | 51                                                  | 2745                                      |
| HLA-B*49:01 | 1                                          | 13                                                   | 54                                                  | 2735                                      |
| HLA-B*50:01 | 0                                          | 20                                                   | 89                                                  | 2694                                      |

|             | <b>IC<sub>50</sub> ≤ 50 nM</b><br><b>Strong binders</b> | <b>50 nM &lt; IC<sub>50</sub> ≤ 500 nM</b><br><b>Regular binders</b> | <b>500 nM &lt; IC<sub>50</sub> ≤ 5000 nM</b><br><b>Weak binders</b> | <b>IC<sub>50</sub> &gt; 5000 nM</b><br><b>Non binders</b> |
|-------------|---------------------------------------------------------|----------------------------------------------------------------------|---------------------------------------------------------------------|-----------------------------------------------------------|
| HLA-B*50:02 | 0                                                       | 11                                                                   | 55                                                                  | 2737                                                      |
| HLA-B*51:01 | 0                                                       | 3                                                                    | 26                                                                  | 2774                                                      |
| HLA-B*51:02 | 0                                                       | 4                                                                    | 34                                                                  | 2765                                                      |
| HLA-B*51:04 | 0                                                       | 1                                                                    | 33                                                                  | 2769                                                      |
| HLA-B*51:05 | 0                                                       | 2                                                                    | 15                                                                  | 2786                                                      |
| HLA-B*51:06 | 0                                                       | 1                                                                    | 37                                                                  | 2765                                                      |
| HLA-B*51:07 | 0                                                       | 0                                                                    | 13                                                                  | 2790                                                      |
| HLA-B*51:08 | 0                                                       | 1                                                                    | 22                                                                  | 2780                                                      |
| HLA-B*51:09 | 0                                                       | 2                                                                    | 25                                                                  | 2776                                                      |
| HLA-B*52:01 | 0                                                       | 0                                                                    | 42                                                                  | 2761                                                      |
| HLA-B*53:01 | 0                                                       | 16                                                                   | 89                                                                  | 2698                                                      |
| HLA-B*53:02 | 0                                                       | 12                                                                   | 89                                                                  | 2702                                                      |
| HLA-B*53:03 | 1                                                       | 15                                                                   | 183                                                                 | 2604                                                      |
| HLA-B*53:05 | 2                                                       | 12                                                                   | 99                                                                  | 2690                                                      |
| HLA-B*54:01 | 5                                                       | 5                                                                    | 45                                                                  | 2748                                                      |
| HLA-B*55:01 | 0                                                       | 7                                                                    | 50                                                                  | 2746                                                      |
| HLA-B*55:02 | 3                                                       | 11                                                                   | 83                                                                  | 2706                                                      |
| HLA-B*55:04 | 14                                                      | 39                                                                   | 190                                                                 | 2560                                                      |
| HLA-B*55:07 | 5                                                       | 5                                                                    | 45                                                                  | 2748                                                      |
| HLA-B*55:12 | 1                                                       | 10                                                                   | 79                                                                  | 2713                                                      |
| HLA-B*56:01 | 2                                                       | 8                                                                    | 74                                                                  | 2719                                                      |
| HLA-B*56:02 | 4                                                       | 20                                                                   | 114                                                                 | 2665                                                      |
| HLA-B*56:03 | 0                                                       | 16                                                                   | 206                                                                 | 2581                                                      |
| HLA-B*56:04 | 4                                                       | 20                                                                   | 114                                                                 | 2665                                                      |
| HLA-B*57:01 | 9                                                       | 26                                                                   | 101                                                                 | 2667                                                      |
| HLA-B*57:02 | 4                                                       | 18                                                                   | 91                                                                  | 2690                                                      |
| HLA-B*57:03 | 10                                                      | 33                                                                   | 119                                                                 | 2641                                                      |
| HLA-B*58:01 | 16                                                      | 43                                                                   | 146                                                                 | 2598                                                      |
| HLA-B*58:02 | 0                                                       | 0                                                                    | 18                                                                  | 2785                                                      |
| HLA-B*59:01 | 0                                                       | 5                                                                    | 56                                                                  | 2742                                                      |
| HLA-B*67:01 | 5                                                       | 23                                                                   | 108                                                                 | 2667                                                      |
| HLA-B*73:01 | 0                                                       | 0                                                                    | 38                                                                  | 2765                                                      |
| HLA-B*78:01 | 0                                                       | 7                                                                    | 43                                                                  | 2753                                                      |
| HLA-B*78:02 | 0                                                       | 2                                                                    | 23                                                                  | 2778                                                      |
| HLA-B*81:01 | 2                                                       | 11                                                                   | 41                                                                  | 2749                                                      |
| HLA-B*82:01 | 0                                                       | 1                                                                    | 29                                                                  | 2773                                                      |
| HLA-B*82:02 | 0                                                       | 1                                                                    | 29                                                                  | 2773                                                      |

Alleles are ordered alphabetically.

## General binding prediction tendencies for *HLA-B*

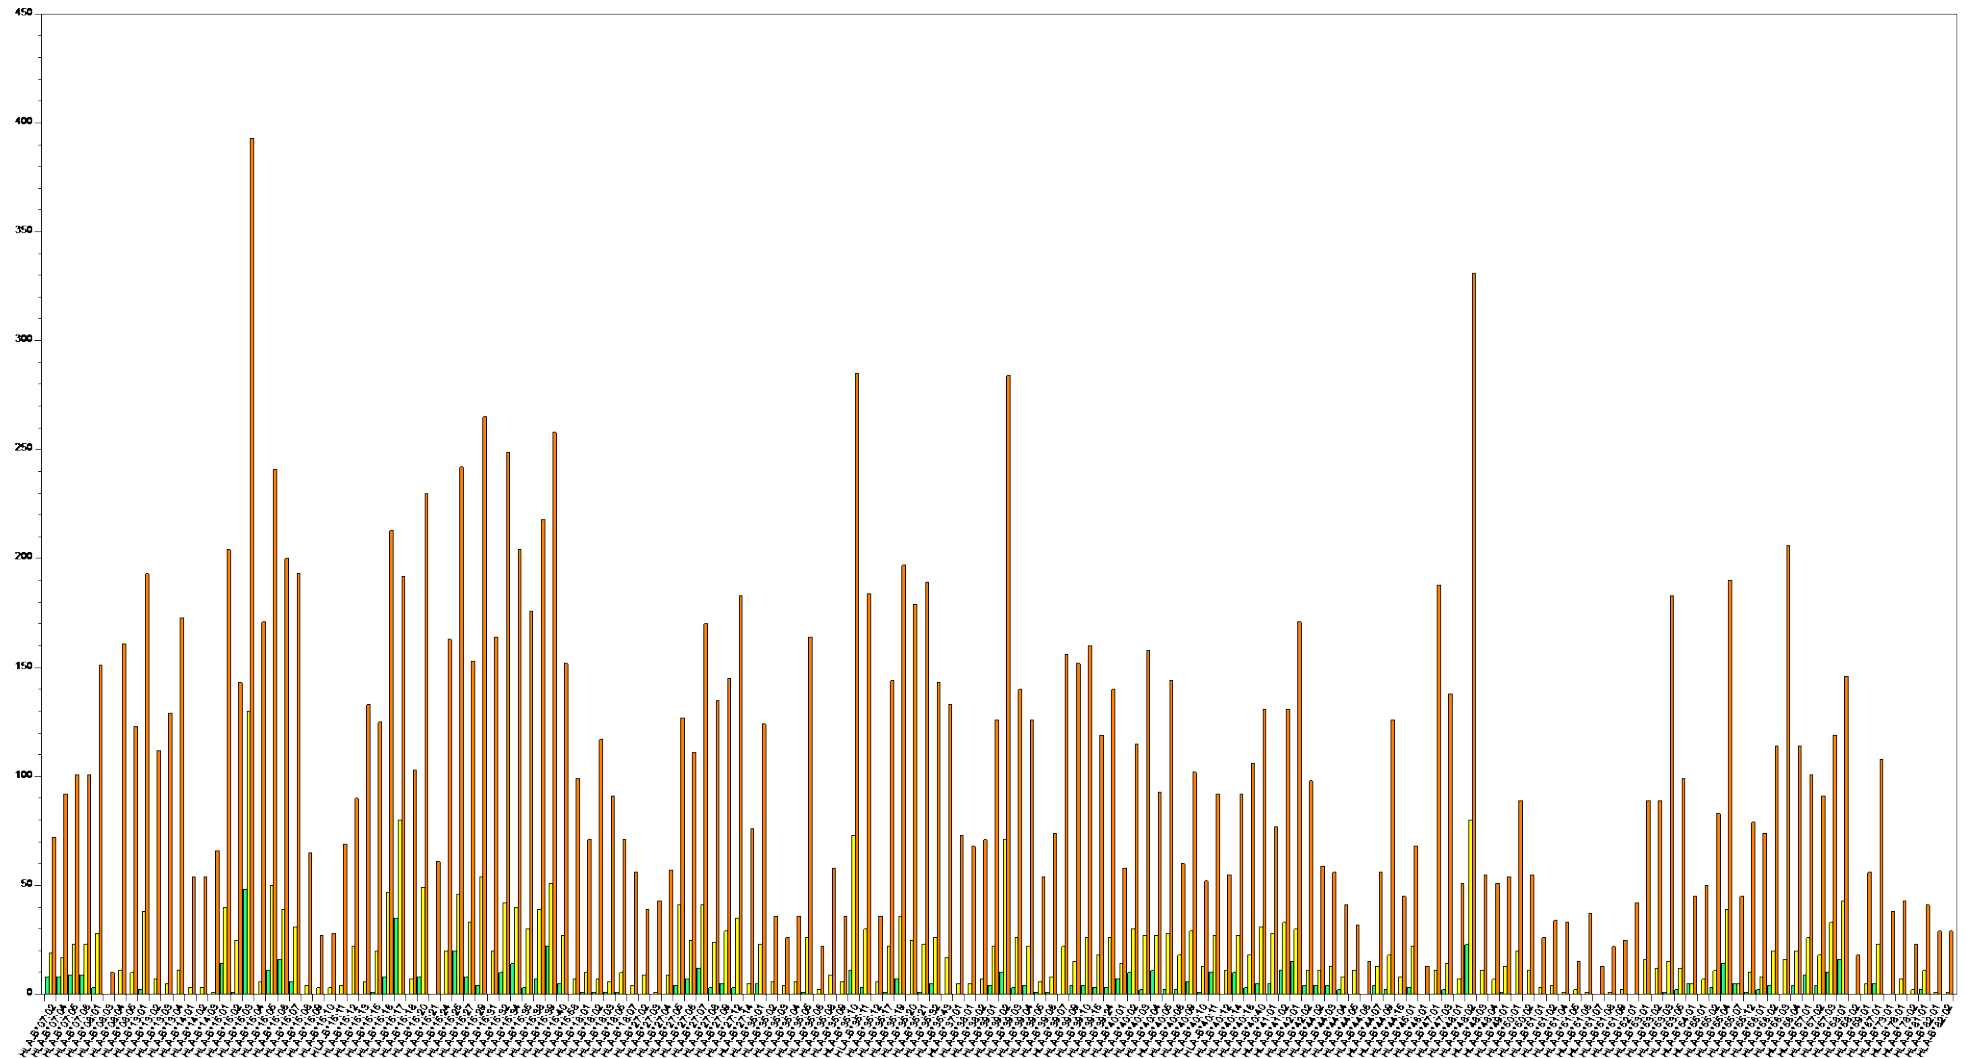

Alleles are ordered alphabetically on the x-axis, while the number of peptides binding with strong ( $IC_{50} \leq 50$  nM), regular ( $50 \text{ nM} < IC_{50} \leq 500$  nM) and weak ( $500 \text{ nM} < IC_{50} \leq 5000$  nM) binding prediction are displayed on the y-axis.

## HLA-B alleles ordered by number of presented peptides with strong binding prediction

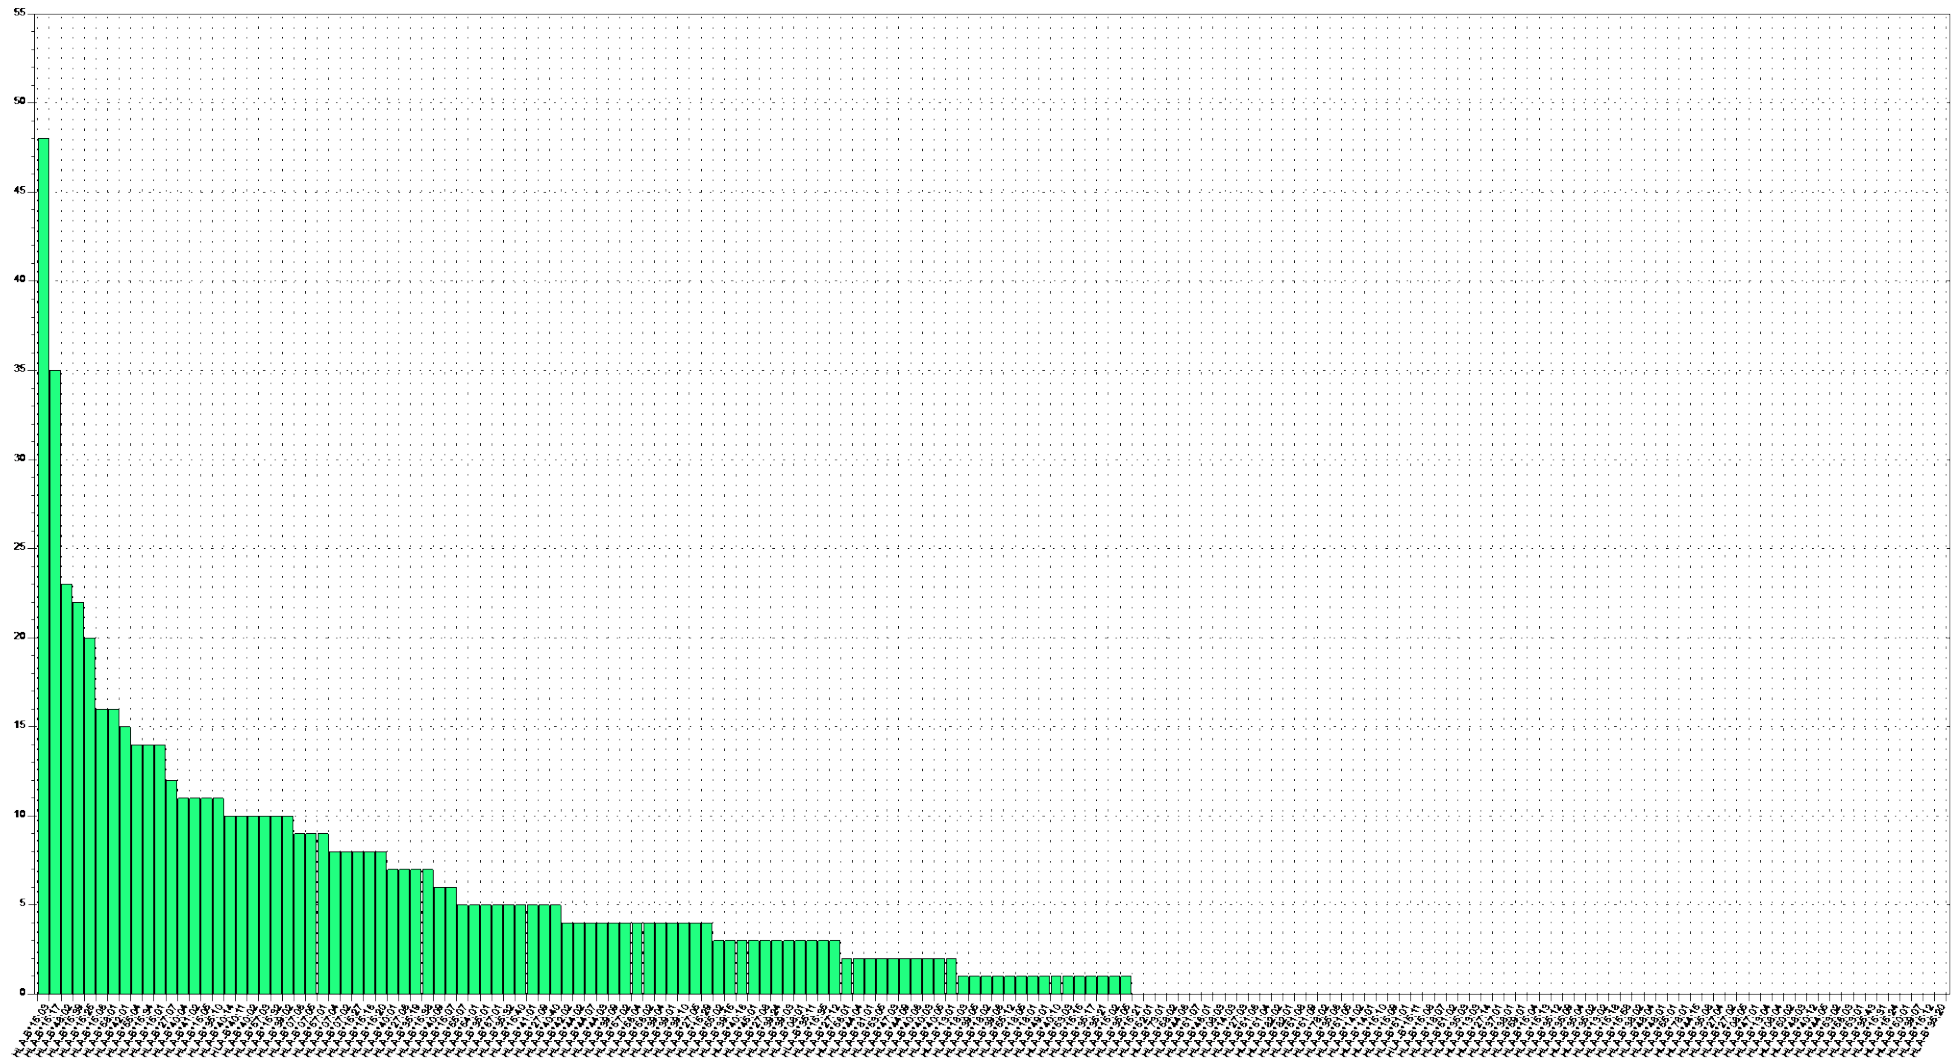

## HLA-B alleles ordered by number of presented peptides with regular binding prediction

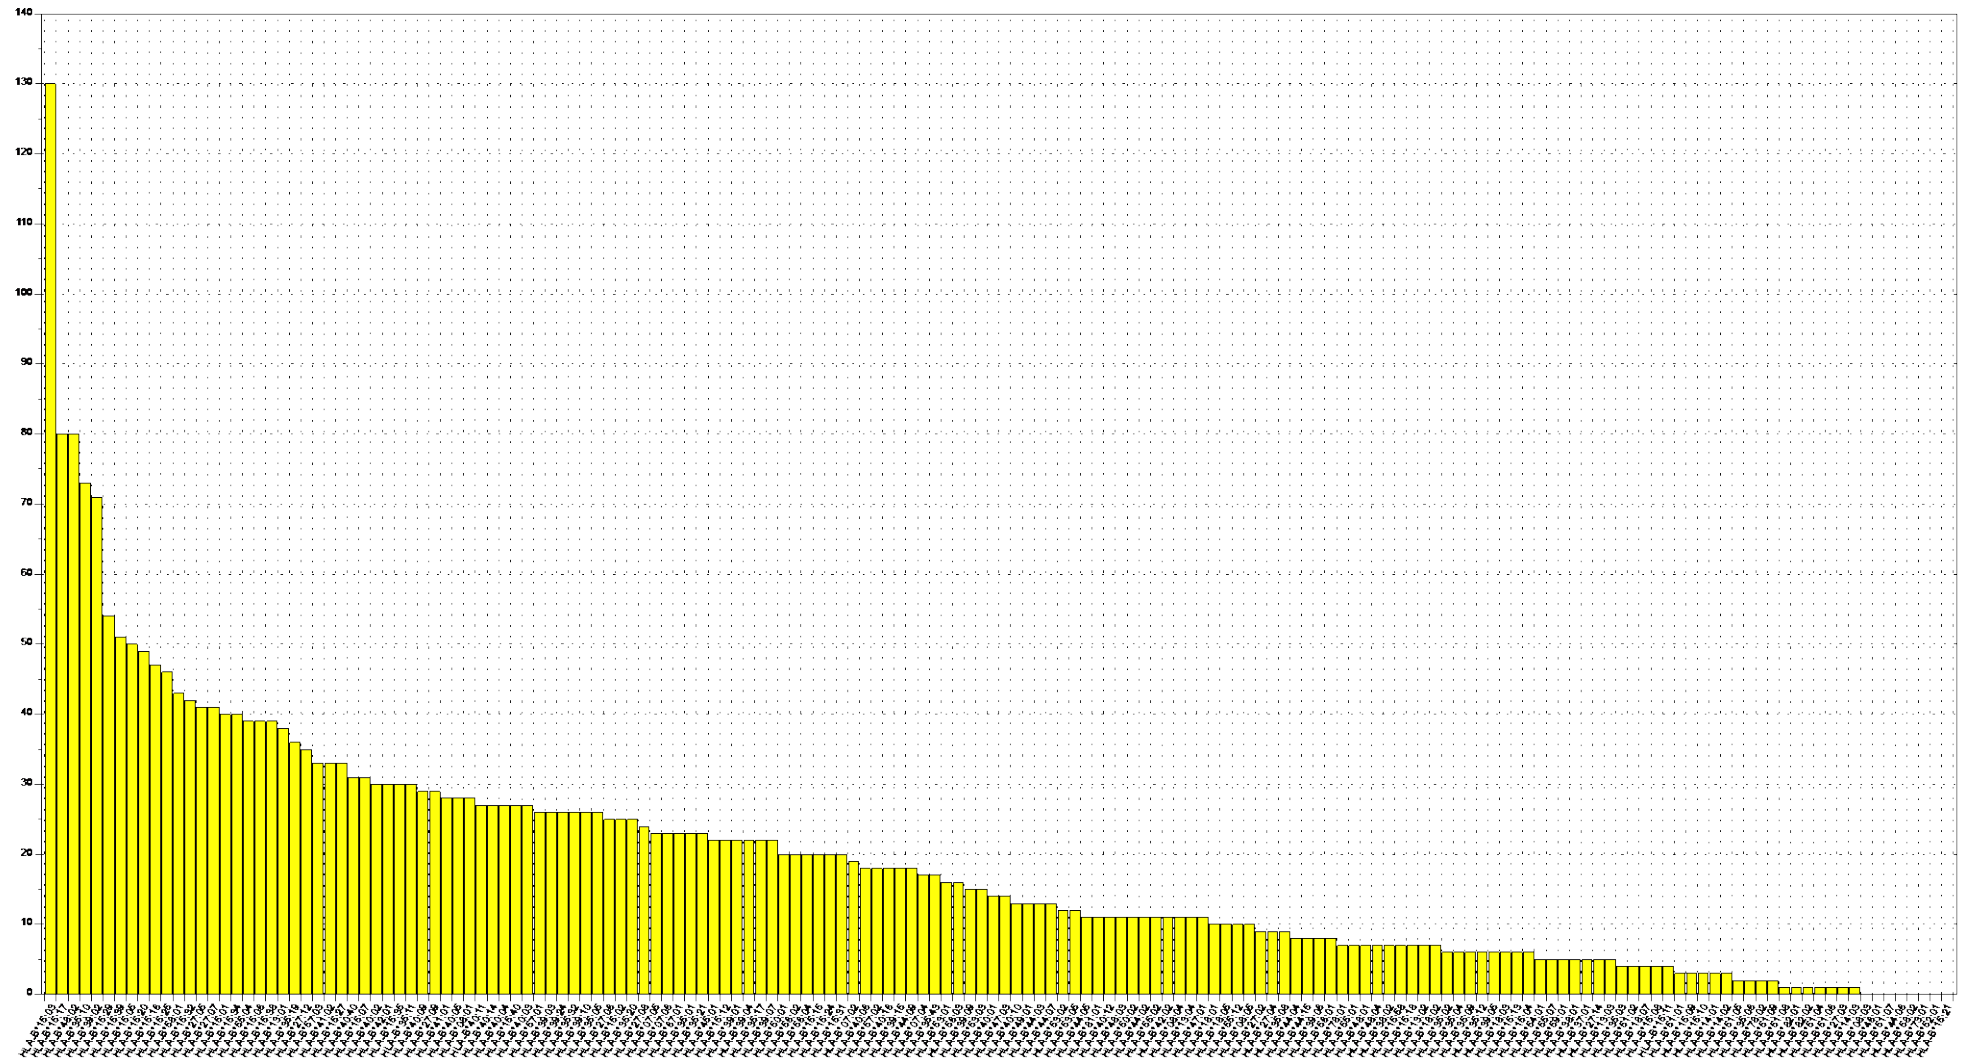

Alleles are ordered on the x-axis by their regular ( $50 \text{ nM} < IC_{50} \leq 500 \text{ nM}$ ) binding prediction and the number of peptides presented are displayed on the y-axis.

## HLA-B alleles ordered by number of presented peptides with weak binding prediction

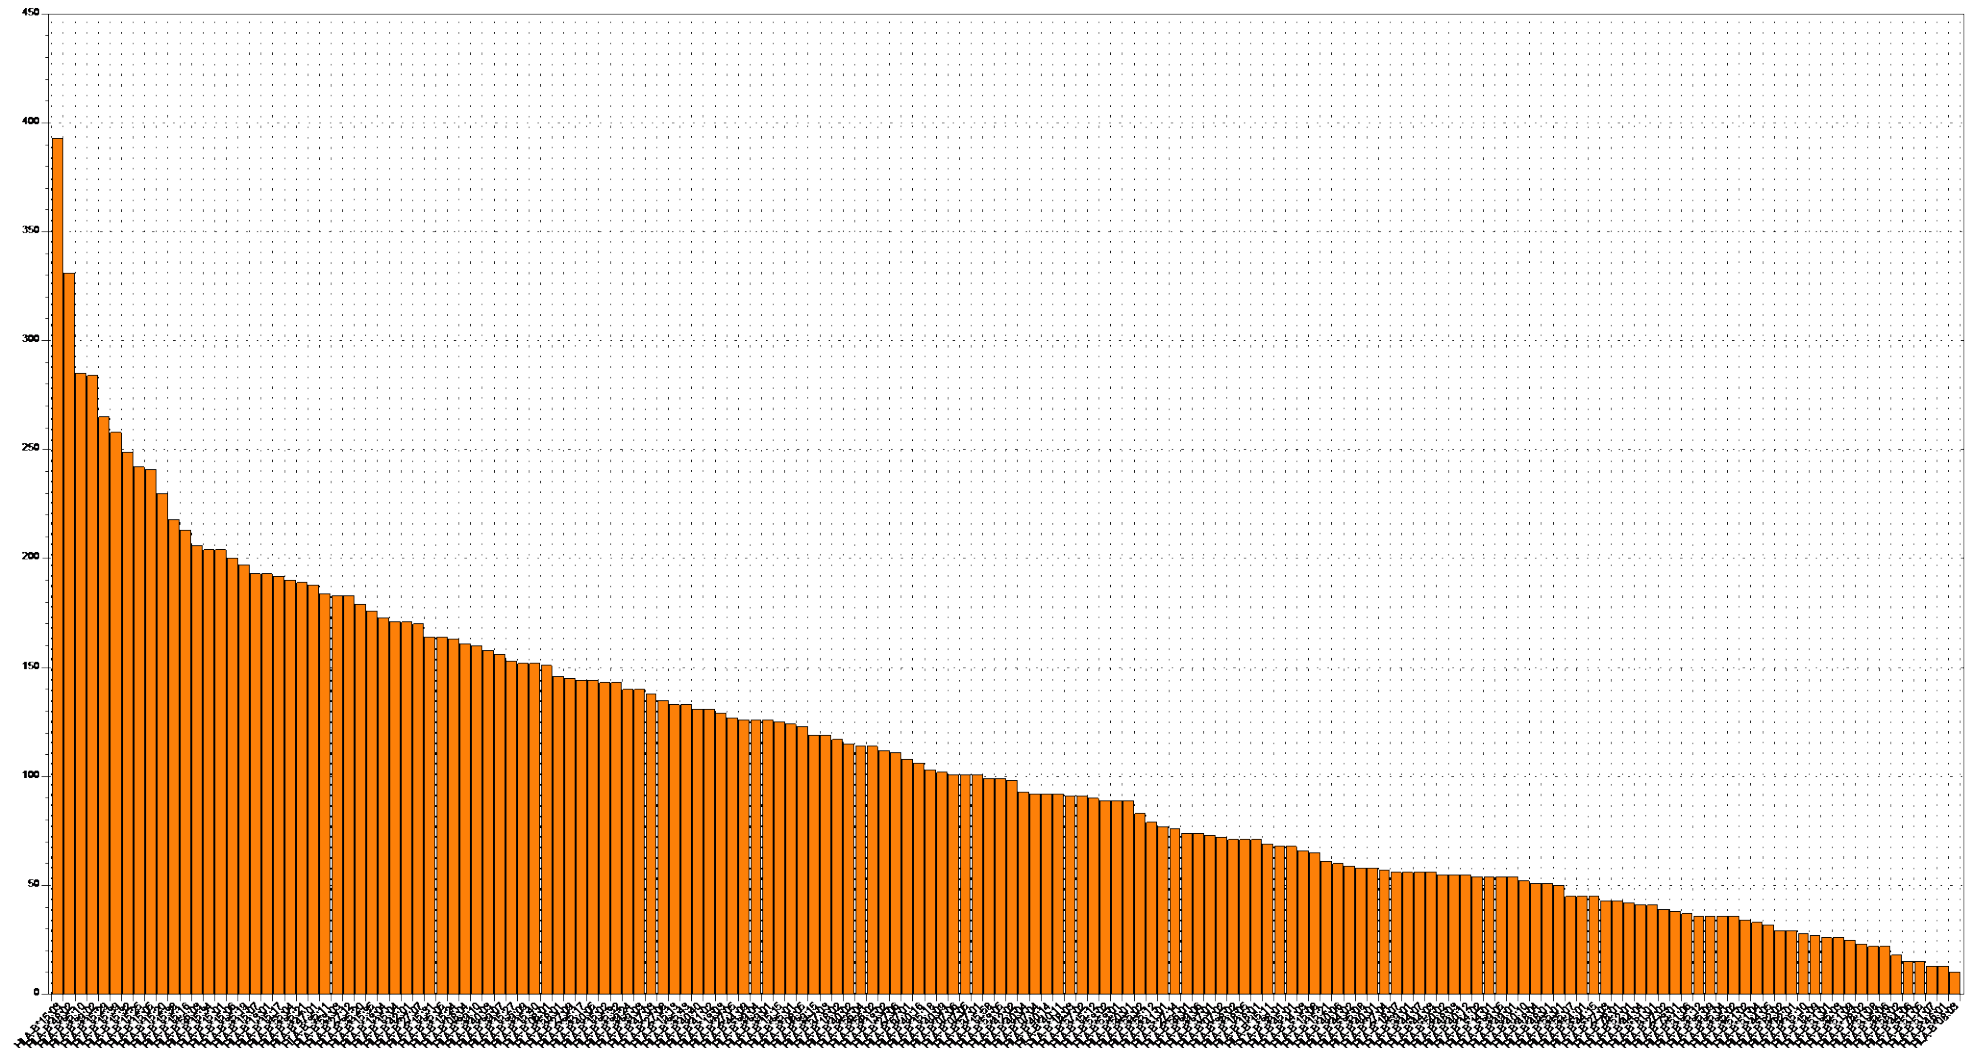

Alleles are ordered on the x-axis by their weak ( $500 \text{ nM} < IC_{50} \leq 5000 \text{ nM}$ ) binding prediction and the number of peptides presented are displayed on the y-axis.

## Total number of peptides with strong, regular and weak binding predictions for *HLA-C*

|             | <b>IC<sub>50</sub> ≤ 50 nM</b><br>Strong binders | <b>50 nM &lt; IC<sub>50</sub> ≤ 500 nM</b><br>Regular binders | <b>500 nM &lt; IC<sub>50</sub> ≤ 5000 nM</b><br>Weak binders | <b>IC<sub>50</sub> &gt; 5000 nM</b><br>Non binders |
|-------------|--------------------------------------------------|---------------------------------------------------------------|--------------------------------------------------------------|----------------------------------------------------|
| HLA-C*01:02 | 0                                                | 2                                                             | 49                                                           | 2752                                               |
| HLA-C*01:03 | 0                                                | 0                                                             | 6                                                            | 2797                                               |
| HLA-C*02:02 | 0                                                | 29                                                            | 224                                                          | 2550                                               |
| HLA-C*02:10 | 0                                                | 29                                                            | 224                                                          | 2550                                               |
| HLA-C*03:02 | 16                                               | 79                                                            | 318                                                          | 2390                                               |
| HLA-C*03:03 | 17                                               | 50                                                            | 196                                                          | 2540                                               |
| HLA-C*03:04 | 17                                               | 50                                                            | 196                                                          | 2540                                               |
| HLA-C*03:05 | 8                                                | 44                                                            | 190                                                          | 2561                                               |
| HLA-C*03:07 | 9                                                | 56                                                            | 210                                                          | 2528                                               |
| HLA-C*04:01 | 0                                                | 1                                                             | 14                                                           | 2788                                               |
| HLA-C*04:03 | 0                                                | 4                                                             | 30                                                           | 2769                                               |
| HLA-C*04:04 | 0                                                | 1                                                             | 22                                                           | 2780                                               |
| HLA-C*04:05 | 0                                                | 1                                                             | 14                                                           | 2788                                               |
| HLA-C*04:06 | 0                                                | 2                                                             | 58                                                           | 2743                                               |
| HLA-C*04:07 | 0                                                | 1                                                             | 14                                                           | 2788                                               |
| HLA-C*05:01 | 2                                                | 12                                                            | 60                                                           | 2729                                               |
| HLA-C*06:02 | 0                                                | 12                                                            | 90                                                           | 2701                                               |
| HLA-C*06:04 | 3                                                | 23                                                            | 210                                                          | 2567                                               |
| HLA-C*06:06 | 1                                                | 21                                                            | 241                                                          | 2540                                               |
| HLA-C*07:01 | 1                                                | 14                                                            | 97                                                           | 2691                                               |
| HLA-C*07:02 | 1                                                | 24                                                            | 187                                                          | 2591                                               |
| HLA-C*07:03 | 0                                                | 22                                                            | 218                                                          | 2563                                               |
| HLA-C*07:04 | 0                                                | 0                                                             | 24                                                           | 2779                                               |
| HLA-C*07:05 | 2                                                | 21                                                            | 175                                                          | 2605                                               |
| HLA-C*07:06 | 1                                                | 14                                                            | 97                                                           | 2691                                               |
| HLA-C*07:07 | 0                                                | 6                                                             | 60                                                           | 2737                                               |
| HLA-C*07:08 | 0                                                | 6                                                             | 66                                                           | 2731                                               |
| HLA-C*07:10 | 0                                                | 23                                                            | 181                                                          | 2599                                               |
| HLA-C*07:11 | 0                                                | 0                                                             | 24                                                           | 2779                                               |
| HLA-C*07:18 | 1                                                | 14                                                            | 97                                                           | 2691                                               |
| HLA-C*08:01 | 0                                                | 13                                                            | 94                                                           | 2696                                               |
| HLA-C*08:02 | 0                                                | 4                                                             | 40                                                           | 2759                                               |
| HLA-C*08:03 | 0                                                | 13                                                            | 94                                                           | 2696                                               |
| HLA-C*08:04 | 0                                                | 13                                                            | 103                                                          | 2687                                               |
| HLA-C*12:02 | 1                                                | 39                                                            | 282                                                          | 2481                                               |
| HLA-C*12:03 | 13                                               | 96                                                            | 384                                                          | 2310                                               |
| HLA-C*12:04 | 2                                                | 62                                                            | 334                                                          | 2405                                               |
| HLA-C*12:05 | 2                                                | 59                                                            | 325                                                          | 2417                                               |
| HLA-C*14:02 | 16                                               | 70                                                            | 391                                                          | 2326                                               |
| HLA-C*14:03 | 16                                               | 70                                                            | 391                                                          | 2326                                               |
| HLA-C*15:02 | 1                                                | 36                                                            | 204                                                          | 2562                                               |
| HLA-C*15:03 | 1                                                | 35                                                            | 216                                                          | 2551                                               |
| HLA-C*15:04 | 2                                                | 64                                                            | 317                                                          | 2420                                               |
| HLA-C*15:05 | 0                                                | 27                                                            | 147                                                          | 2629                                               |
| HLA-C*15:06 | 5                                                | 70                                                            | 224                                                          | 2504                                               |
| HLA-C*15:07 | 3                                                | 40                                                            | 207                                                          | 2553                                               |
| HLA-C*15:08 | 2                                                | 19                                                            | 144                                                          | 2638                                               |
| HLA-C*15:13 | 1                                                | 36                                                            | 204                                                          | 2562                                               |
| HLA-C*16:01 | 12                                               | 89                                                            | 340                                                          | 2362                                               |
| HLA-C*16:02 | 0                                                | 37                                                            | 286                                                          | 2480                                               |
| HLA-C*16:04 | 6                                                | 70                                                            | 345                                                          | 2382                                               |
| HLA-C*17:01 | 0                                                | 20                                                            | 242                                                          | 2541                                               |
| HLA-C*17:03 | 0                                                | 10                                                            | 121                                                          | 2672                                               |
| HLA-C*18:01 | 0                                                | 0                                                             | 4                                                            | 2799                                               |
| HLA-C*18:02 | 0                                                | 0                                                             | 4                                                            | 2799                                               |

Alleles are ordered alphabetically.

## General binding prediction tendencies for *HLA-C*

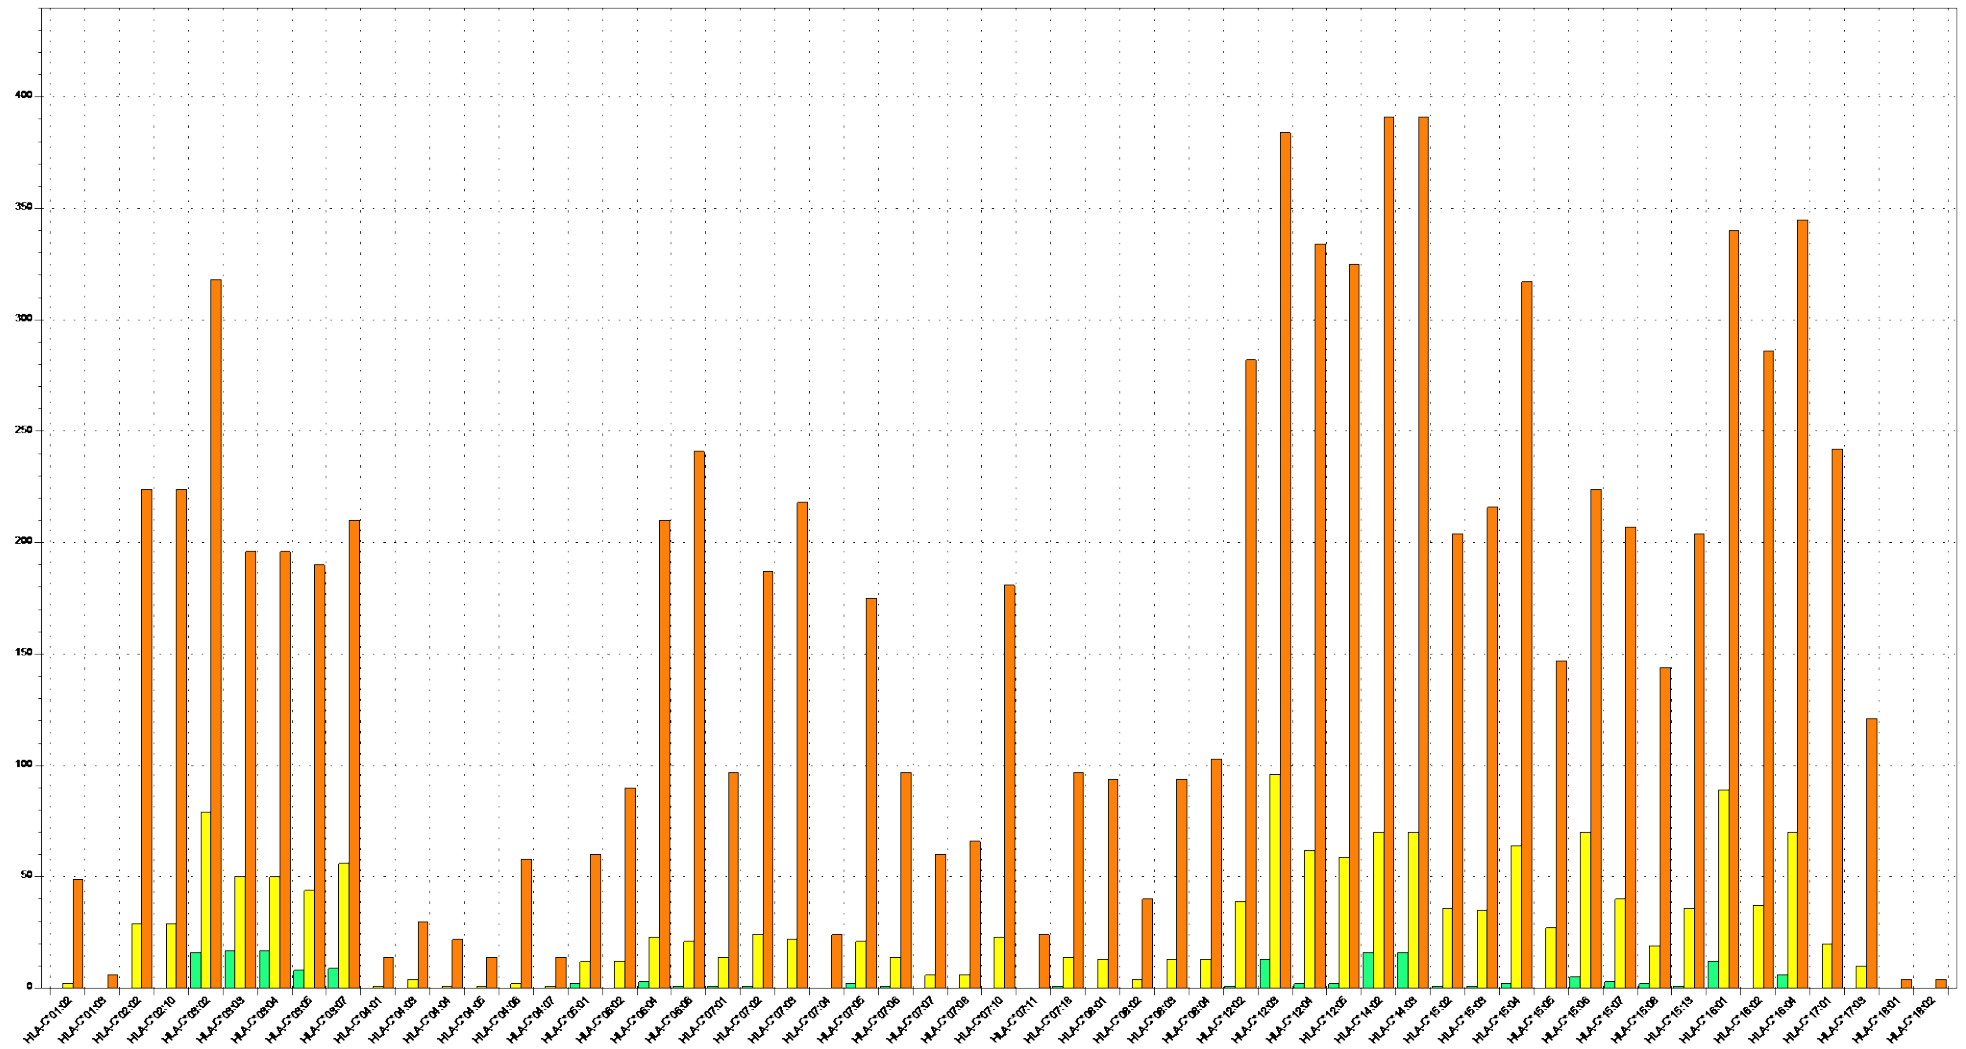

Alleles are ordered alphabetically on the x-axis, while the number of peptides binding with strong ( $IC_{50} \leq 50$  nM), regular ( $50$  nM  $< IC_{50} \leq 500$  nM) and weak ( $500$  nM  $< IC_{50} \leq 5000$  nM) binding prediction are displayed on the y-axis.





## HLA-C alleles ordered by number of presented peptides with regular binding prediction

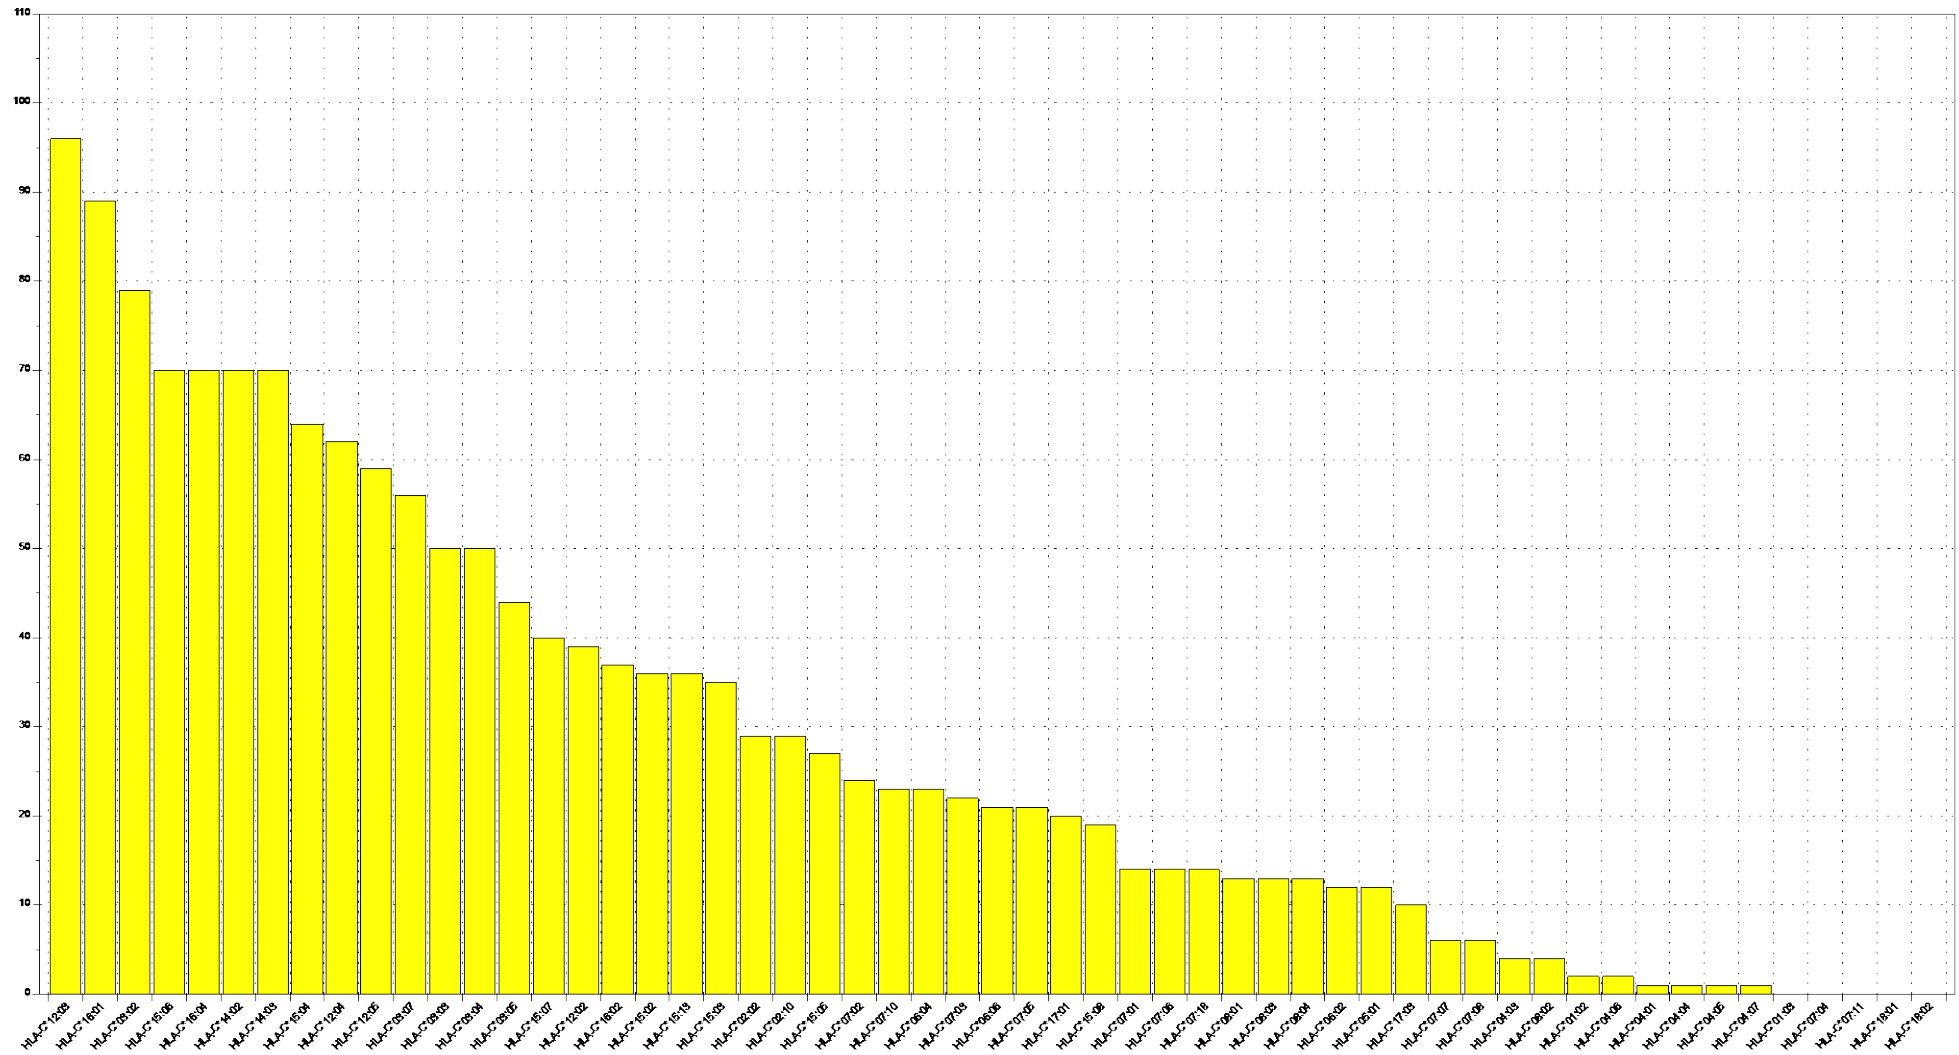

Alleles are ordered on the x-axis by their regular ( $50 \text{ nM} < \text{IC}_{50} \leq 500 \text{ nM}$ ) binding prediction and the number of peptides presented are displayed on the y-axis.

## HLA-C alleles ordered by number of presented peptides with weak binding prediction

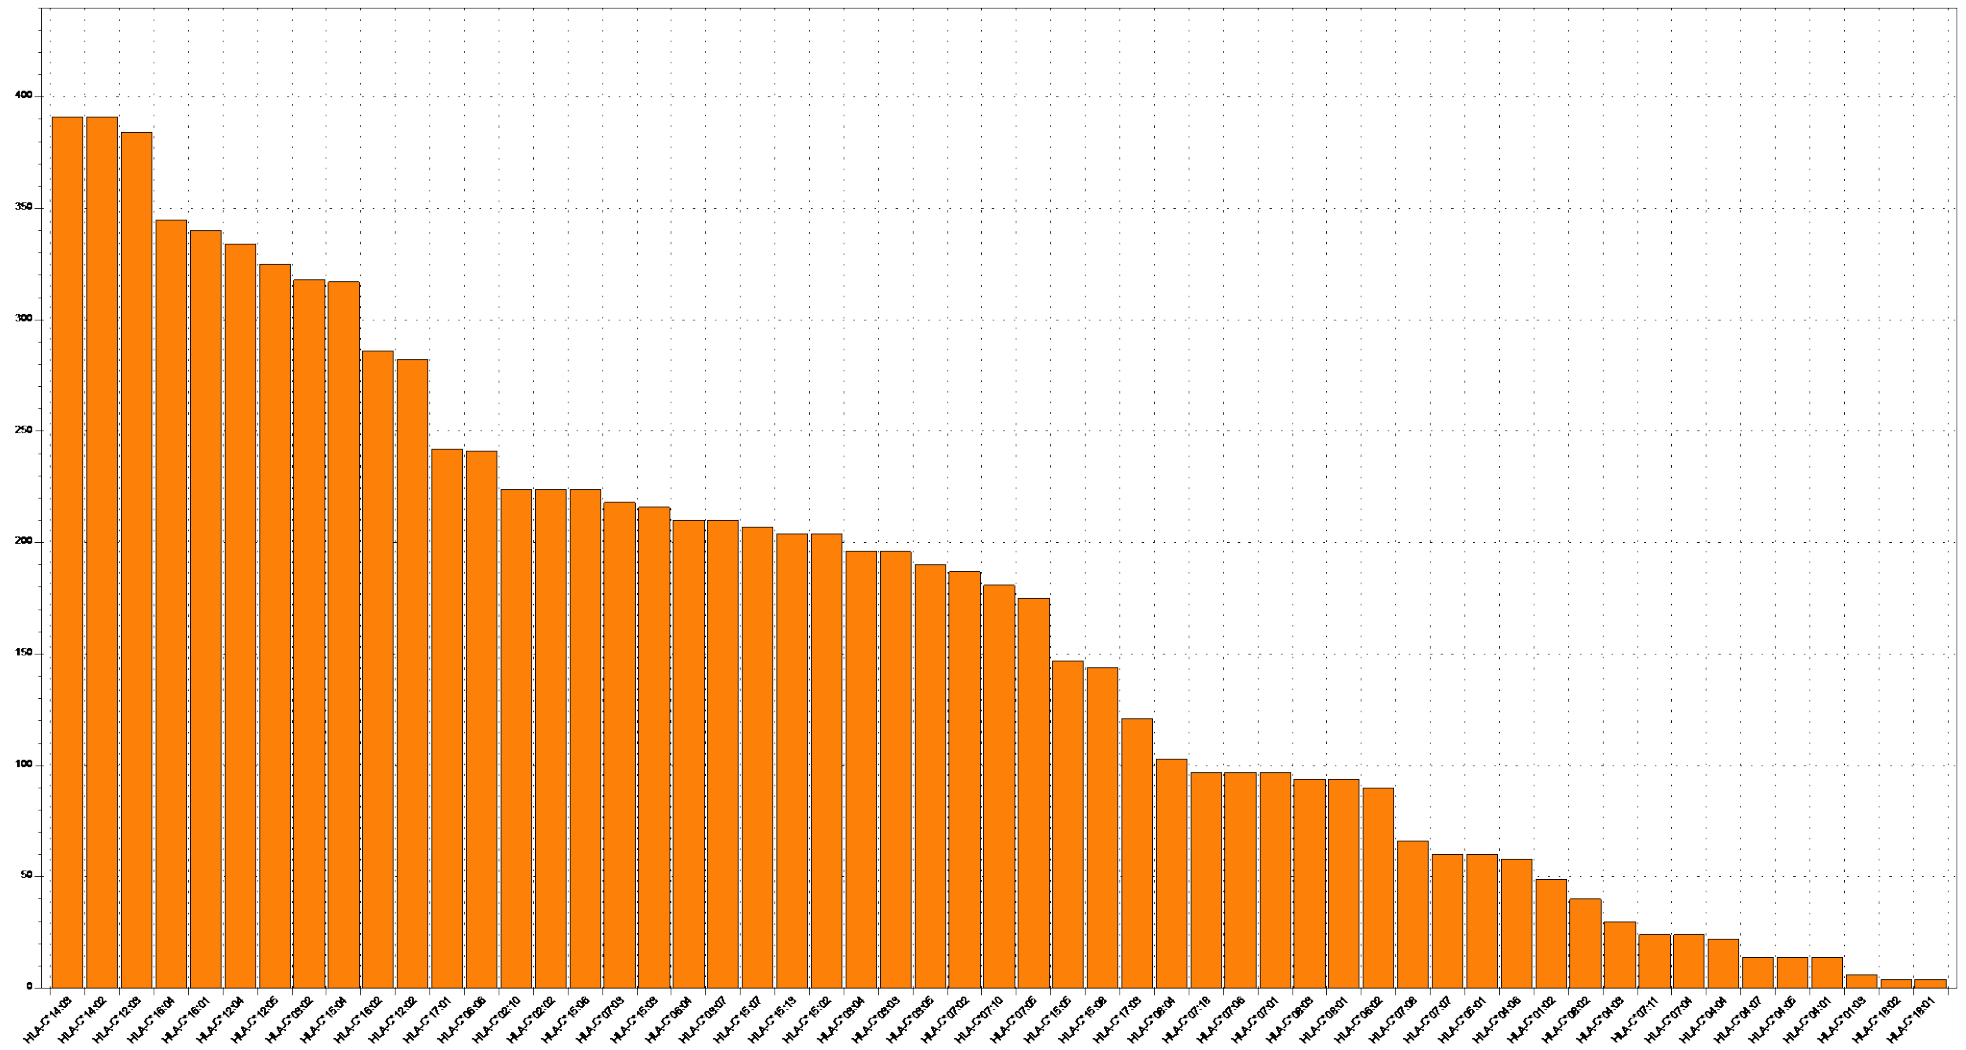

Alleles are ordered on the x-axis by their weak ( $500 \text{ nM} < \text{IC}_{50} \leq 5000 \text{ nM}$ ) binding prediction and the number of peptides presented are displayed on the y-axis.

## Total number of peptides with strong, regular and weak binding predictions for *HLA-DRB1*

|                | <b>IC<sub>50</sub> ≤ 50 nM</b><br>Strong binders | <b>50 nM &lt; IC<sub>50</sub> ≤ 1000 nM</b><br>Regular binders | <b>1000 nM &lt; IC<sub>50</sub> ≤ 5000 nM</b><br>Weak binders | <b>IC<sub>50</sub> &gt; 5000 nM</b><br>Non binders |
|----------------|--------------------------------------------------|----------------------------------------------------------------|---------------------------------------------------------------|----------------------------------------------------|
| HLA-DRB1*01:01 | 182                                              | 348                                                            | 830                                                           | 1418                                               |
| HLA-DRB1*01:02 | 2                                                | 329                                                            | 1120                                                          | 1327                                               |
| HLA-DRB1*01:03 | 0                                                | 107                                                            | 792                                                           | 1879                                               |
| HLA-DRB1*01:04 | 77                                               | 417                                                            | 945                                                           | 1339                                               |
| HLA-DRB1*03:01 | 0                                                | 137                                                            | 989                                                           | 1652                                               |
| HLA-DRB1*03:02 | 0                                                | 0                                                              | 43                                                            | 2735                                               |
| HLA-DRB1*03:03 | 0                                                | 12                                                             | 280                                                           | 2486                                               |
| HLA-DRB1*03:04 | 0                                                | 137                                                            | 989                                                           | 1652                                               |
| HLA-DRB1*03:05 | 0                                                | 56                                                             | 587                                                           | 2135                                               |
| HLA-DRB1*03:06 | 0                                                | 97                                                             | 945                                                           | 1736                                               |
| HLA-DRB1*03:07 | 0                                                | 91                                                             | 709                                                           | 1978                                               |
| HLA-DRB1*03:08 | 0                                                | 137                                                            | 989                                                           | 1652                                               |
| HLA-DRB1*04:01 | 8                                                | 323                                                            | 1222                                                          | 1225                                               |
| HLA-DRB1*04:02 | 2                                                | 231                                                            | 1084                                                          | 1461                                               |
| HLA-DRB1*04:03 | 2                                                | 174                                                            | 1070                                                          | 1532                                               |
| HLA-DRB1*04:04 | 9                                                | 359                                                            | 1073                                                          | 1337                                               |
| HLA-DRB1*04:05 | 7                                                | 355                                                            | 1116                                                          | 1300                                               |
| HLA-DRB1*04:06 | 2                                                | 174                                                            | 1070                                                          | 1532                                               |
| HLA-DRB1*04:07 | 0                                                | 96                                                             | 846                                                           | 1836                                               |
| HLA-DRB1*04:08 | 4                                                | 264                                                            | 1168                                                          | 1342                                               |
| HLA-DRB1*04:10 | 3                                                | 335                                                            | 1108                                                          | 1332                                               |
| HLA-DRB1*04:11 | 0                                                | 206                                                            | 1123                                                          | 1449                                               |
| HLA-DRB1*04:13 | 4                                                | 438                                                            | 1127                                                          | 1209                                               |
| HLA-DRB1*04:15 | 0                                                | 68                                                             | 649                                                           | 2061                                               |
| HLA-DRB1*04:17 | 0                                                | 127                                                            | 1001                                                          | 1650                                               |
| HLA-DRB1*07:01 | 24                                               | 377                                                            | 981                                                           | 1396                                               |
| HLA-DRB1*08:01 | 0                                                | 267                                                            | 1101                                                          | 1410                                               |
| HLA-DRB1*08:02 | 0                                                | 208                                                            | 1191                                                          | 1379                                               |
| HLA-DRB1*08:03 | 0                                                | 64                                                             | 978                                                           | 1736                                               |
| HLA-DRB1*08:04 | 2                                                | 240                                                            | 1037                                                          | 1499                                               |
| HLA-DRB1*08:05 | 3                                                | 242                                                            | 971                                                           | 1562                                               |
| HLA-DRB1*08:06 | 2                                                | 220                                                            | 956                                                           | 1600                                               |
| HLA-DRB1*08:07 | 0                                                | 367                                                            | 1224                                                          | 1187                                               |
| HLA-DRB1*08:09 | 0                                                | 208                                                            | 1191                                                          | 1379                                               |
| HLA-DRB1*08:10 | 0                                                | 220                                                            | 1112                                                          | 1446                                               |
| HLA-DRB1*08:11 | 0                                                | 386                                                            | 1213                                                          | 1179                                               |
| HLA-DRB1*08:12 | 0                                                | 104                                                            | 929                                                           | 1745                                               |
| HLA-DRB1*09:01 | 7                                                | 391                                                            | 1100                                                          | 1280                                               |
| HLA-DRB1*10:01 | 69                                               | 403                                                            | 907                                                           | 1399                                               |
| HLA-DRB1*11:01 | 33                                               | 229                                                            | 930                                                           | 1586                                               |
| HLA-DRB1*11:02 | 105                                              | 366                                                            | 947                                                           | 1360                                               |
| HLA-DRB1*11:03 | 58                                               | 291                                                            | 1117                                                          | 1312                                               |
| HLA-DRB1*11:04 | 31                                               | 214                                                            | 945                                                           | 1588                                               |
| HLA-DRB1*11:05 | 8                                                | 290                                                            | 1086                                                          | 1394                                               |
| HLA-DRB1*11:06 | 4                                                | 174                                                            | 791                                                           | 1809                                               |
| HLA-DRB1*11:08 | 5                                                | 434                                                            | 1107                                                          | 1232                                               |
| HLA-DRB1*11:09 | 33                                               | 229                                                            | 930                                                           | 1586                                               |
| HLA-DRB1*11:10 | 33                                               | 229                                                            | 930                                                           | 1586                                               |
| HLA-DRB1*11:11 | 34                                               | 292                                                            | 1042                                                          | 1410                                               |
| HLA-DRB1*11:12 | 33                                               | 229                                                            | 930                                                           | 1586                                               |
| HLA-DRB1*11:14 | 25                                               | 305                                                            | 1027                                                          | 1421                                               |
| HLA-DRB1*11:15 | 33                                               | 229                                                            | 930                                                           | 1586                                               |
| HLA-DRB1*11:19 | 2                                                | 235                                                            | 1148                                                          | 1393                                               |
| HLA-DRB1*11:28 | 33                                               | 229                                                            | 930                                                           | 1586                                               |
| HLA-DRB1*12:01 | 0                                                | 206                                                            | 851                                                           | 1721                                               |
| HLA-DRB1*12:02 | 0                                                | 120                                                            | 681                                                           | 1977                                               |
| HLA-DRB1*12:03 | 0                                                | 245                                                            | 1022                                                          | 1511                                               |
| HLA-DRB1*13:01 | 105                                              | 366                                                            | 947                                                           | 1360                                               |
| HLA-DRB1*13:02 | 25                                               | 305                                                            | 1027                                                          | 1421                                               |
| HLA-DRB1*13:03 | 0                                                | 262                                                            | 1247                                                          | 1269                                               |
| HLA-DRB1*13:04 | 70                                               | 329                                                            | 1029                                                          | 1350                                               |
| HLA-DRB1*13:05 | 33                                               | 229                                                            | 930                                                           | 1586                                               |

|                | <b>IC<sub>50</sub> ≤ 50 nM</b><br><b>Strong binders</b> | <b>50 nM &lt; IC<sub>50</sub> ≤ 1000 nM</b><br><b>Regular binders</b> | <b>1000 nM &lt; IC<sub>50</sub> ≤ 5000 nM</b><br><b>Weak binders</b> | <b>IC<sub>50</sub> &gt; 5000 nM</b><br><b>Non binders</b> |
|----------------|---------------------------------------------------------|-----------------------------------------------------------------------|----------------------------------------------------------------------|-----------------------------------------------------------|
| HLA-DRB1*13:06 | 25                                                      | 278                                                                   | 1052                                                                 | 1423                                                      |
| HLA-DRB1*13:07 | 11                                                      | 218                                                                   | 951                                                                  | 1598                                                      |
| HLA-DRB1*13:08 | 49                                                      | 321                                                                   | 1071                                                                 | 1337                                                      |
| HLA-DRB1*13:10 | 0                                                       | 148                                                                   | 1114                                                                 | 1516                                                      |
| HLA-DRB1*13:11 | 31                                                      | 214                                                                   | 945                                                                  | 1588                                                      |
| HLA-DRB1*13:12 | 0                                                       | 246                                                                   | 1218                                                                 | 1314                                                      |
| HLA-DRB1*13:22 | 105                                                     | 366                                                                   | 947                                                                  | 1360                                                      |
| HLA-DRB1*14:01 | 0                                                       | 496                                                                   | 1265                                                                 | 1017                                                      |
| HLA-DRB1*14:02 | 0                                                       | 254                                                                   | 1294                                                                 | 1230                                                      |
| HLA-DRB1*14:03 | 0                                                       | 112                                                                   | 1058                                                                 | 1608                                                      |
| HLA-DRB1*14:04 | 0                                                       | 454                                                                   | 1385                                                                 | 939                                                       |
| HLA-DRB1*14:05 | 0                                                       | 293                                                                   | 1349                                                                 | 1136                                                      |
| HLA-DRB1*14:06 | 5                                                       | 396                                                                   | 1222                                                                 | 1155                                                      |
| HLA-DRB1*14:07 | 0                                                       | 235                                                                   | 1407                                                                 | 1136                                                      |
| HLA-DRB1*14:08 | 0                                                       | 293                                                                   | 1349                                                                 | 1136                                                      |
| HLA-DRB1*14:09 | 1                                                       | 447                                                                   | 1275                                                                 | 1055                                                      |
| HLA-DRB1*14:10 | 0                                                       | 239                                                                   | 1169                                                                 | 1370                                                      |
| HLA-DRB1*14:12 | 0                                                       | 227                                                                   | 1194                                                                 | 1357                                                      |
| HLA-DRB1*14:13 | 0                                                       | 288                                                                   | 1344                                                                 | 1146                                                      |
| HLA-DRB1*14:14 | 0                                                       | 122                                                                   | 1142                                                                 | 1514                                                      |
| HLA-DRB1*14:18 | 0                                                       | 174                                                                   | 1188                                                                 | 1416                                                      |
| HLA-DRB1*14:54 | 0                                                       | 496                                                                   | 1265                                                                 | 1017                                                      |
| HLA-DRB1*15:01 | 14                                                      | 246                                                                   | 932                                                                  | 1586                                                      |
| HLA-DRB1*15:02 | 1                                                       | 225                                                                   | 1014                                                                 | 1538                                                      |
| HLA-DRB1*15:03 | 0                                                       | 150                                                                   | 790                                                                  | 1838                                                      |
| HLA-DRB1*15:04 | 4                                                       | 207                                                                   | 951                                                                  | 1616                                                      |
| HLA-DRB1*15:06 | 14                                                      | 246                                                                   | 932                                                                  | 1586                                                      |
| HLA-DRB1*15:11 | 1                                                       | 167                                                                   | 1023                                                                 | 1587                                                      |
| HLA-DRB1*16:01 | 1                                                       | 194                                                                   | 957                                                                  | 1626                                                      |
| HLA-DRB1*16:02 | 4                                                       | 355                                                                   | 1126                                                                 | 1293                                                      |
| HLA-DRB1*16:03 | 1                                                       | 194                                                                   | 957                                                                  | 1626                                                      |
| HLA-DRB1*16:05 | 2                                                       | 198                                                                   | 1061                                                                 | 1517                                                      |

Alleles are ordered alphabetically.

## General binding prediction tendencies for *HLA-DRB1*

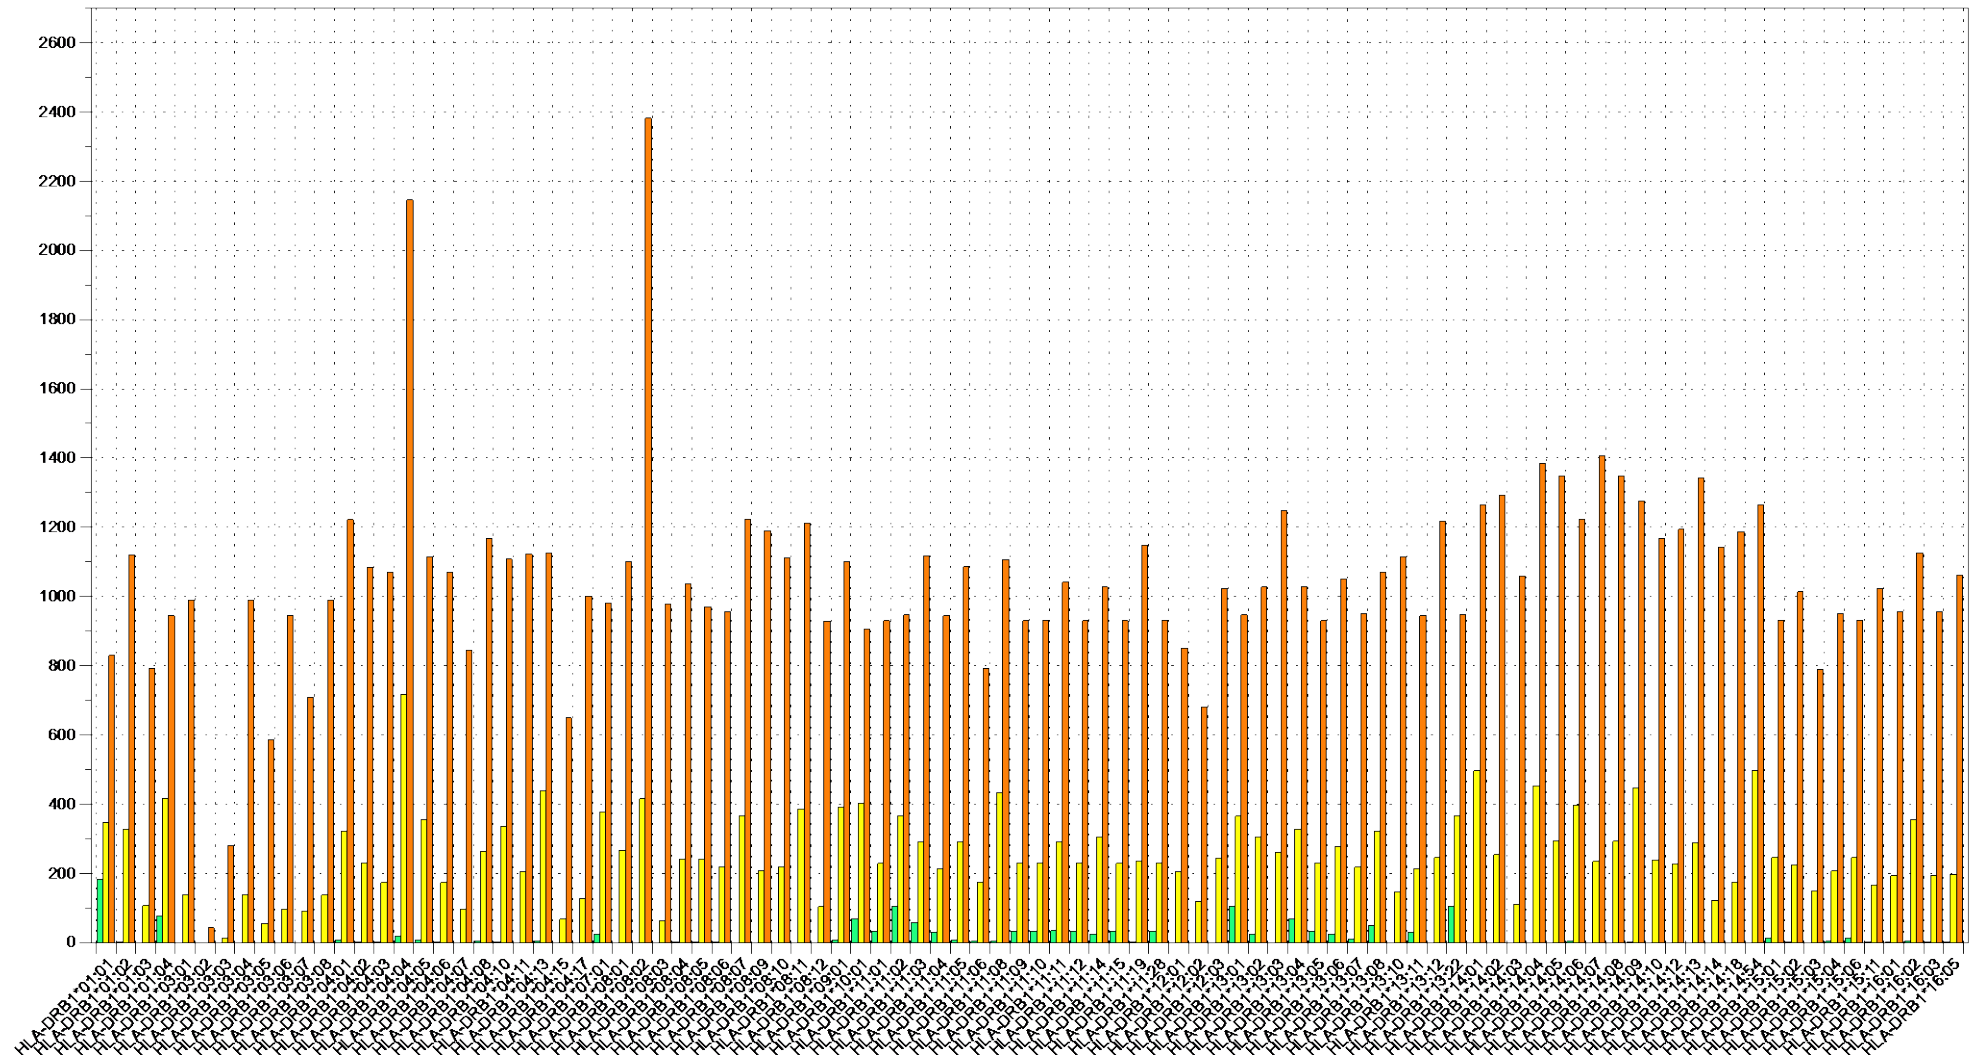

Alleles are ordered alphabetically on the x-axis, while the number of peptides binding with strong ( $IC_{50} \leq 50$  nM), regular ( $50$  nM  $< IC_{50} \leq 1000$  nM) and weak ( $1000$  nM  $< IC_{50} \leq 5000$  nM) binding prediction are displayed on the y-axis.



## HLA-DRB1 alleles ordered by number of presented peptides with regular binding prediction

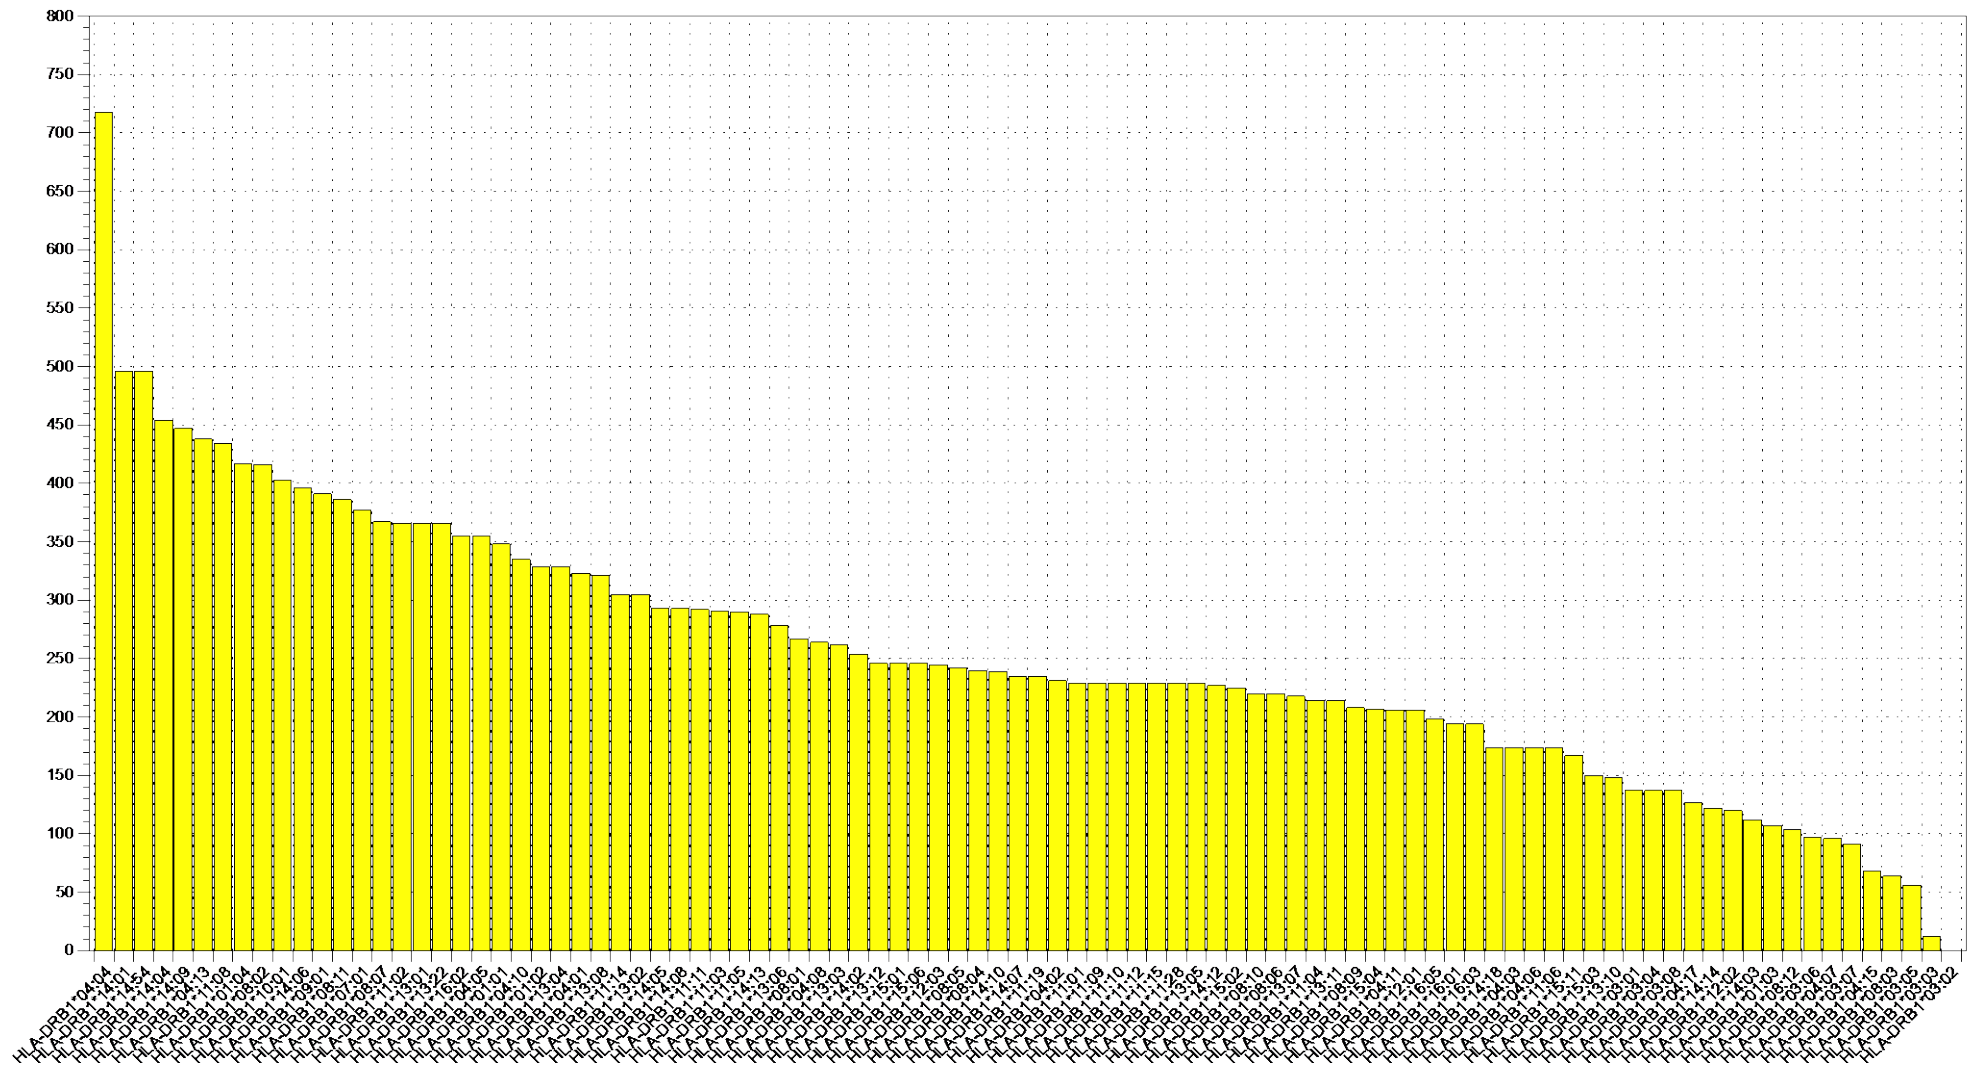

Alleles are ordered on the x-axis by their regular ( $50 \text{ nM} < IC_{50} \leq 1000 \text{ nM}$ ) binding prediction and the number of peptides presented are displayed on the y-axis.



## HLA-DRB1 alleles ordered by number of presented peptides with weak binding prediction

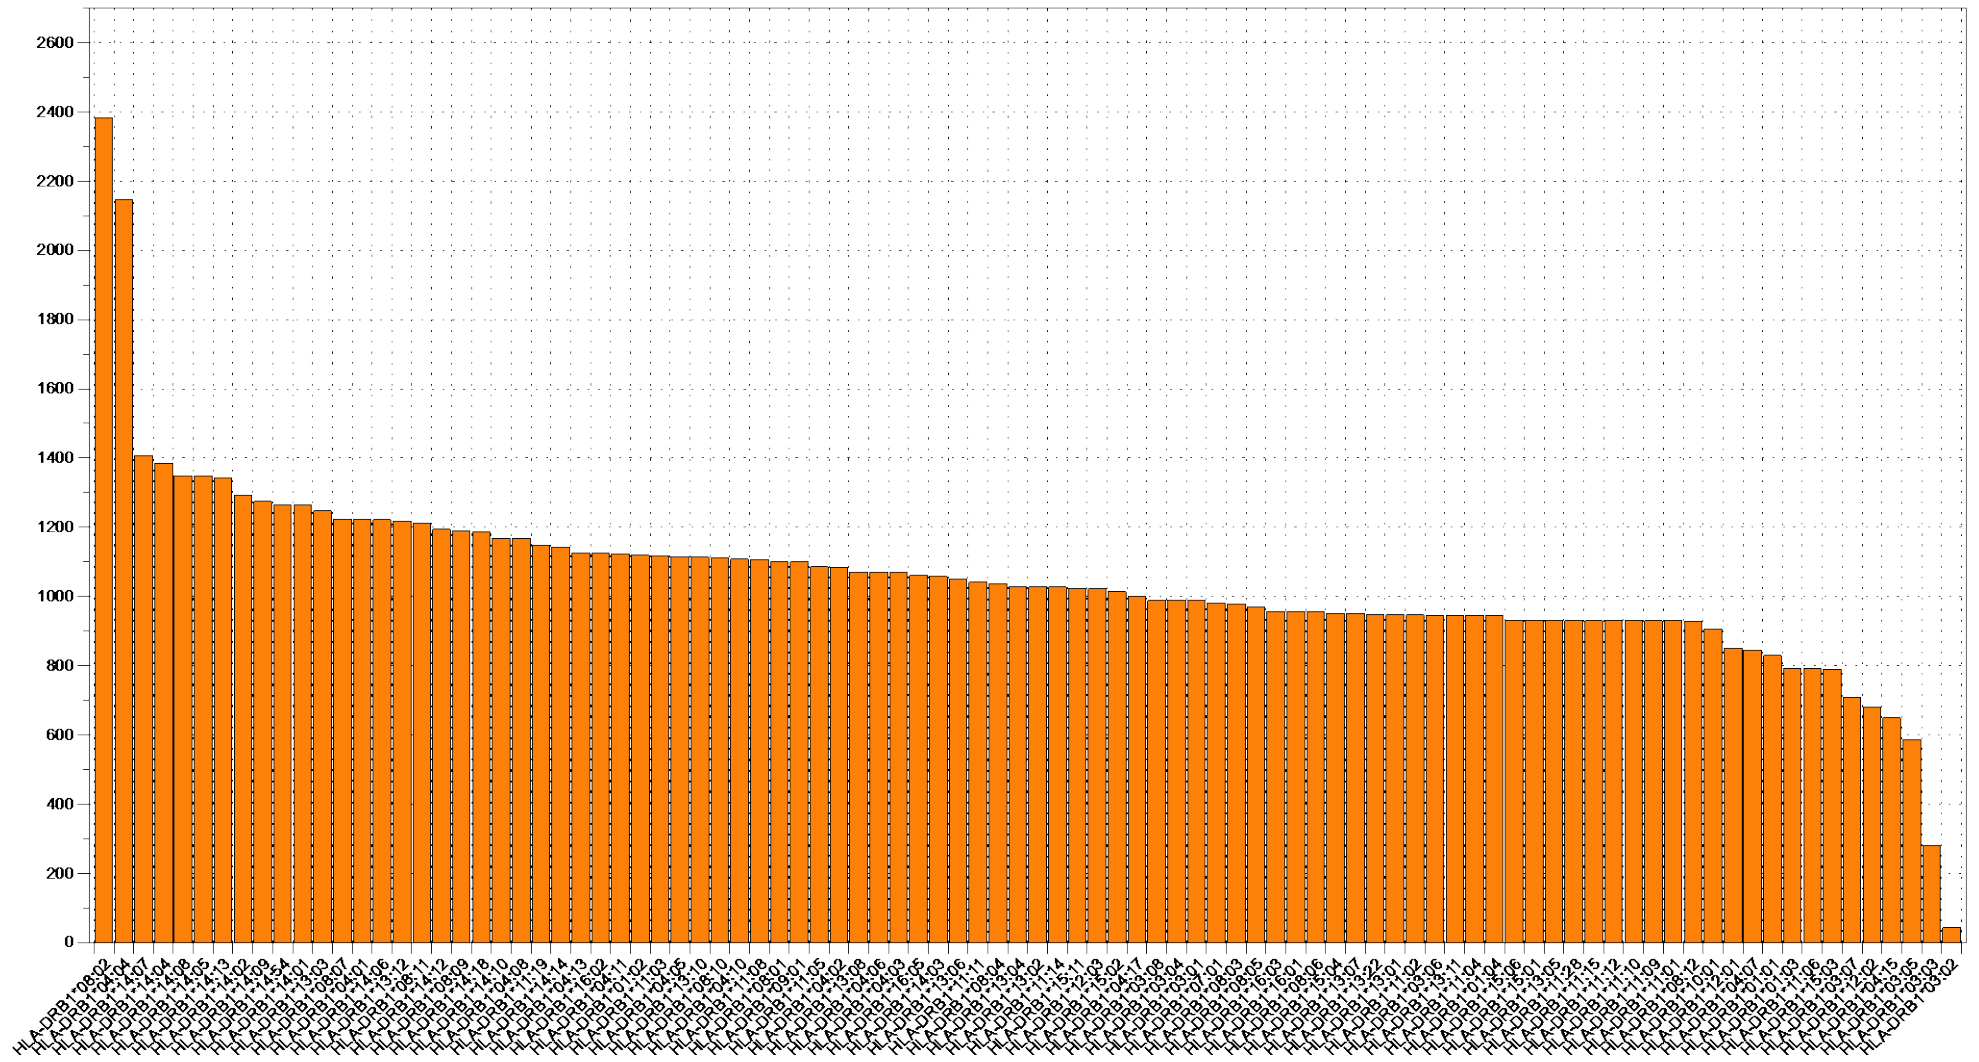

Alleles are ordered on the x-axis by their weak ( $1000 \text{ nM} < IC_{50} \leq 5000 \text{ nM}$ ) binding prediction and the number of peptides presented are displayed on the y-axis.

**Total number of peptides with strong, regular and weak binding predictions for *HLA-DQA1/-DQB1***

|                           | <b>IC<sub>50</sub> ≤ 50 nM<br/>Strong binders</b> | <b>50 nM &lt; IC<sub>50</sub> ≤ 1000 nM<br/>Regular binders</b> | <b>1000 nM &lt; IC<sub>50</sub> ≤ 5000 nM<br/>Weak binders</b> | <b>IC<sub>50</sub> &gt; 5000 nM<br/>Non binders</b> |
|---------------------------|---------------------------------------------------|-----------------------------------------------------------------|----------------------------------------------------------------|-----------------------------------------------------|
| HLA-DQA1*05:01/DQB1*02:01 | 0                                                 | 162                                                             | 1052                                                           | 1564                                                |
| HLA-DQA1*02:01/DQB1*02:01 | 0                                                 | 34                                                              | 566                                                            | 2178                                                |
| HLA-DQA1*02:01/DQB1*02:02 | 0                                                 | 34                                                              | 566                                                            | 2178                                                |
| HLA-DQA1*05:01/DQB1*02:03 | 0                                                 | 170                                                             | 1277                                                           | 1331                                                |
| HLA-DQA1*05:01/DQB1*03:01 | 5                                                 | 231                                                             | 1108                                                           | 1434                                                |
| HLA-DQA1*03:01/DQB1*03:02 | 0                                                 | 47                                                              | 841                                                            | 1890                                                |
| HLA-DQA1*02:01/DQB1*03:03 | 0                                                 | 253                                                             | 1093                                                           | 1432                                                |
| HLA-DQA1*03:01/DQB1*03:03 | 0                                                 | 57                                                              | 967                                                            | 1754                                                |
| HLA-DQA1*03:02/DQB1*03:03 | 0                                                 | 57                                                              | 967                                                            | 1754                                                |
| HLA-DQA1*03:01/DQB1*03:04 | 0                                                 | 101                                                             | 1322                                                           | 1355                                                |
| HLA-DQA1*03:01/DQB1*03:05 | 0                                                 | 49                                                              | 1341                                                           | 1388                                                |
| HLA-DQA1*05:01/DQB1*03:05 | 0                                                 | 401                                                             | 1606                                                           | 771                                                 |
| HLA-DQA1*03:01/DQB1*03:07 | 0                                                 | 47                                                              | 841                                                            | 1890                                                |
| HLA-DQA1*01:03/DQB1*03:19 | 0                                                 | 279                                                             | 1272                                                           | 1227                                                |
| HLA-DQA1*01:05/DQB1*03:19 | 0                                                 | 38                                                              | 913                                                            | 1827                                                |
| HLA-DQA1*05:05/DQB1*03:19 | 5                                                 | 231                                                             | 1108                                                           | 1434                                                |
| HLA-DQA1*03:01/DQB1*04:01 | 0                                                 | 27                                                              | 729                                                            | 2022                                                |
| HLA-DQA1*03:03/DQB1*04:01 | 0                                                 | 27                                                              | 729                                                            | 2022                                                |
| HLA-DQA1*04:01/DQB1*04:01 | 0                                                 | 48                                                              | 941                                                            | 1789                                                |
| HLA-DQA1*04:01/DQB1*04:02 | 0                                                 | 48                                                              | 941                                                            | 1789                                                |
| HLA-DQA1*01:01/DQB1*05:01 | 0                                                 | 43                                                              | 498                                                            | 2237                                                |
| HLA-DQA1*01:02/DQB1*05:02 | 0                                                 | 38                                                              | 590                                                            | 2150                                                |
| HLA-DQA1*01:01/DQB1*05:03 | 0                                                 | 12                                                              | 333                                                            | 2433                                                |
| HLA-DQA1*01:03/DQB1*06:01 | 0                                                 | 111                                                             | 1208                                                           | 1459                                                |
| HLA-DQA1*01:02/DQB1*06:02 | 0                                                 | 123                                                             | 1130                                                           | 1525                                                |
| HLA-DQA1*01:03/DQB1*06:02 | 0                                                 | 178                                                             | 1172                                                           | 1428                                                |
| HLA-DQA1*01:02/DQB1*06:03 | 0                                                 | 4                                                               | 264                                                            | 2510                                                |
| HLA-DQA1*01:03/DQB1*06:03 | 0                                                 | 0                                                               | 296                                                            | 2482                                                |
| HLA-DQA1*01:02/DQB1*06:08 | 0                                                 | 7                                                               | 508                                                            | 2263                                                |
| HLA-DQA1*01:02/DQB1*06:09 | 0                                                 | 0                                                               | 5                                                              | 2773                                                |
| HLA-DQA1*01:02/DQB1*06:10 | 0                                                 | 5                                                               | 760                                                            | 2013                                                |
| HLA-DQA1*01:02/DQB1*06:11 | 0                                                 | 77                                                              | 904                                                            | 1797                                                |
| HLA-DQA1*01:03/DQB1*06:11 | 0                                                 | 134                                                             | 1023                                                           | 1621                                                |
| HLA-DQA1*01:02/DQB1*06:14 | 0                                                 | 0                                                               | 395                                                            | 2383                                                |

Allele combinations are ordered alphabetically.

## General binding prediction tendencies for *HLA-DQA1/DQB1*

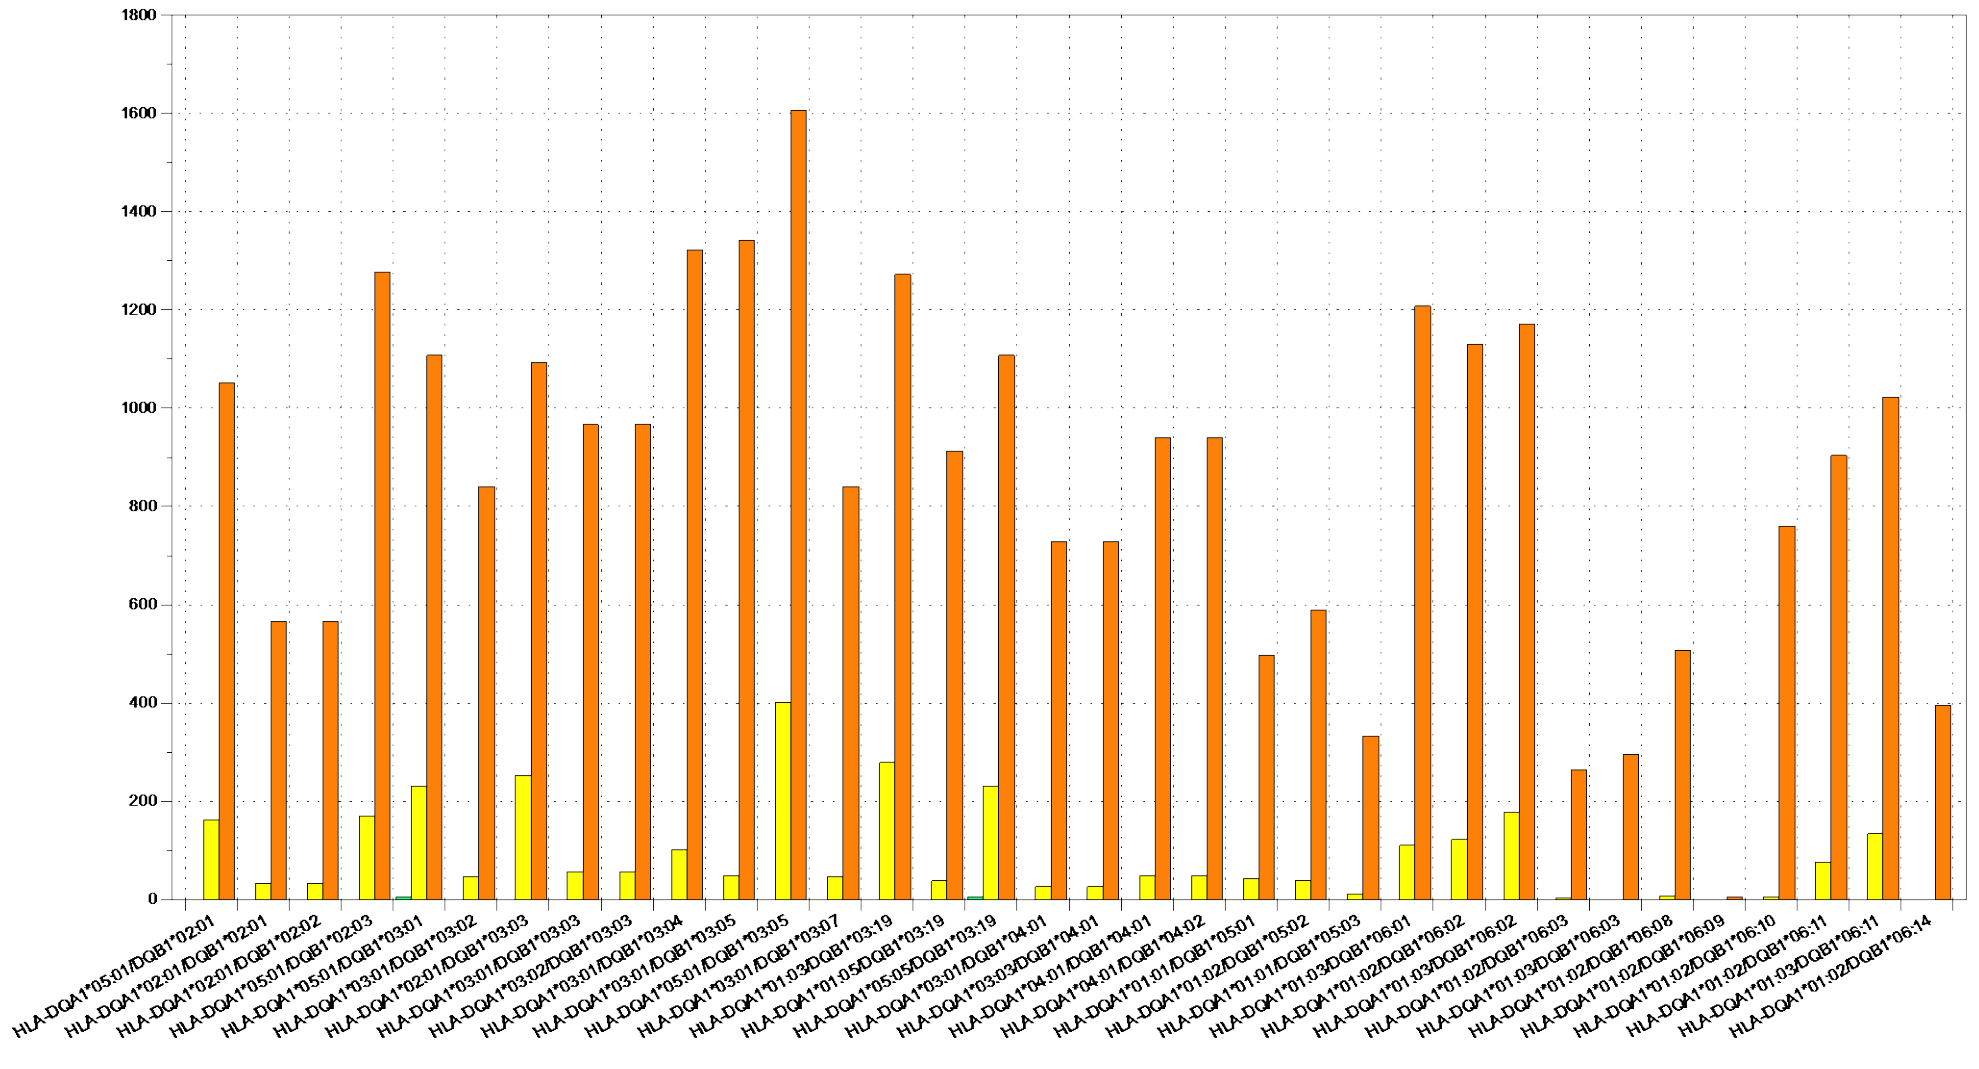

Allele combinations are ordered alphabetically on the x-axis, while the number of peptides binding with strong ( $IC_{50} \leq 50$  nM), regular ( $50$  nM  $< IC_{50} \leq 1000$  nM) and weak ( $1000$  nM  $< IC_{50} \leq 5000$  nM) binding prediction are displayed on the y-axis.

## HLA-DQA1/-DQB1 alleles ordered by number of presented peptides with strong binding prediction

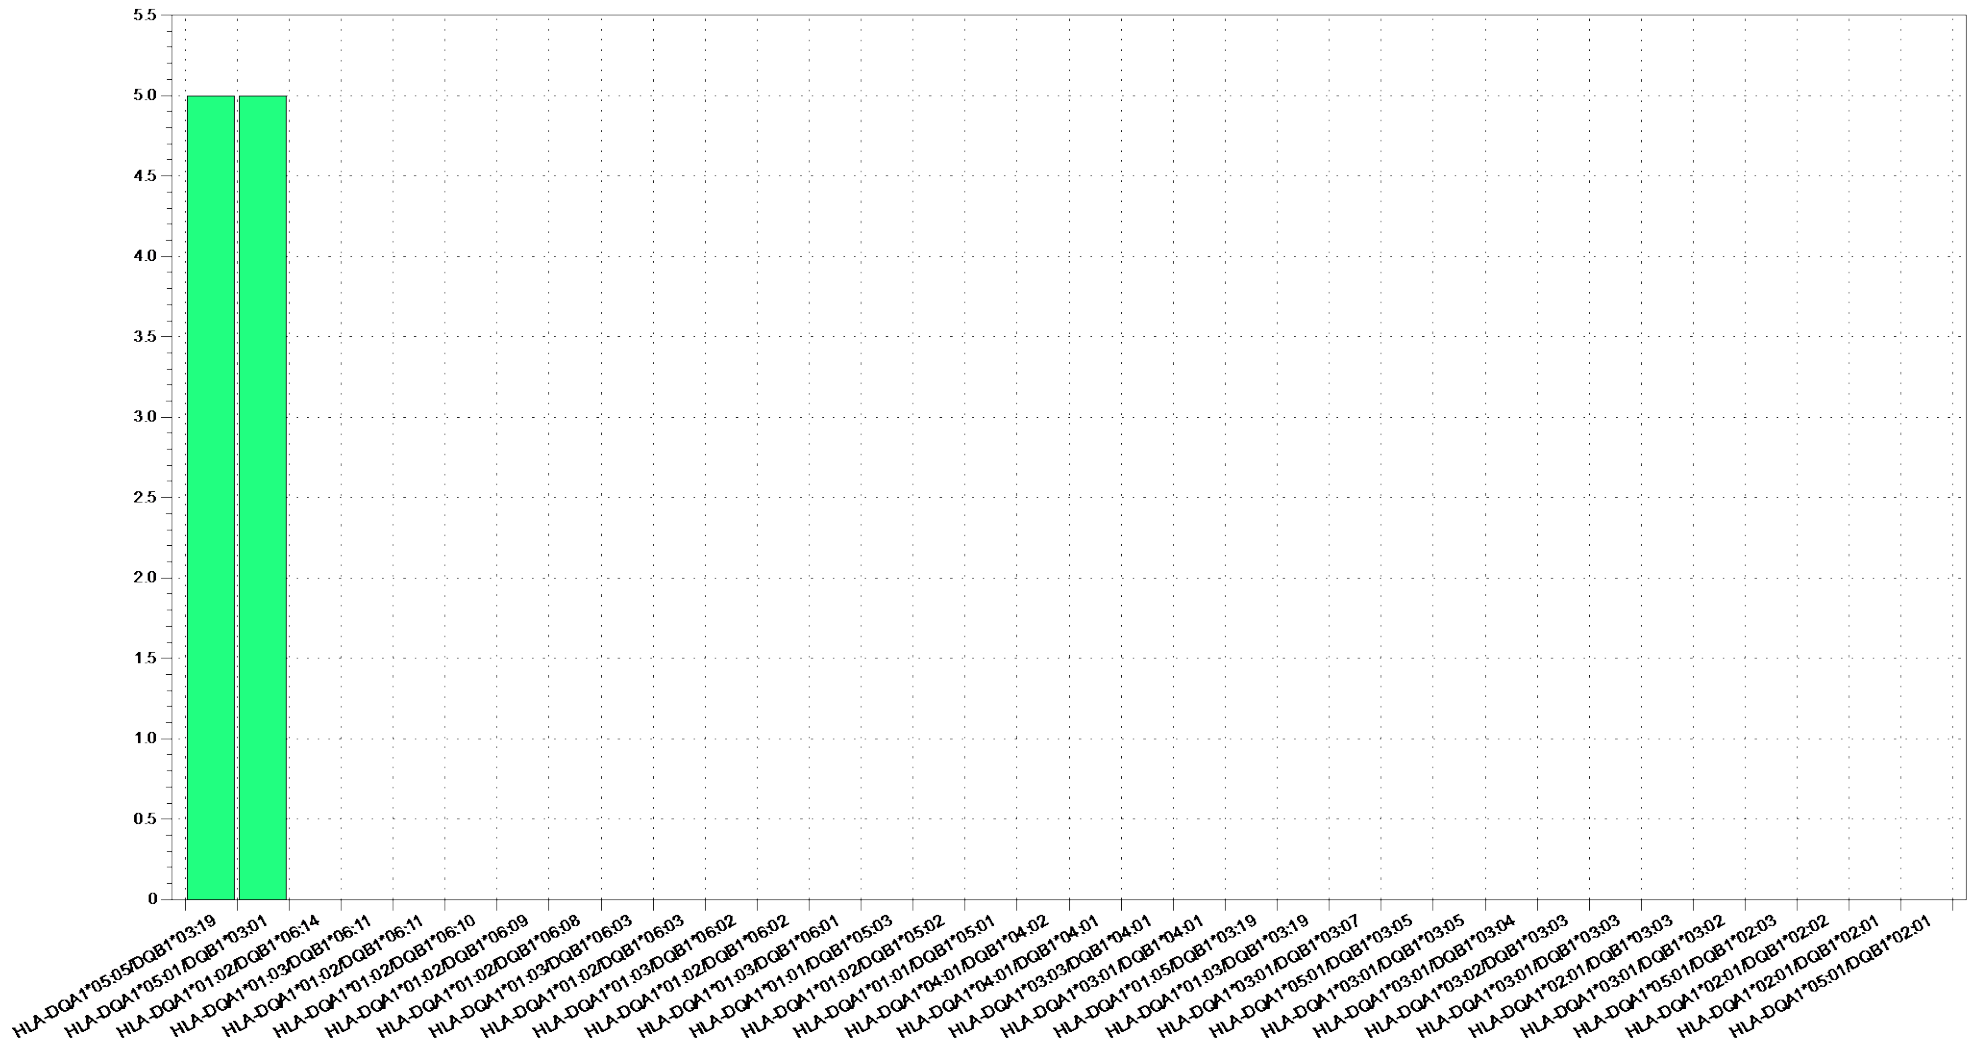

Allele combinations are ordered on the x-axis by their strong ( $IC_{50} \leq 50$  nM) binding prediction and the number of peptides presented are displayed on the y-axis.

## HLA-DQA1/-DQB1 alleles ordered by number of presented peptides with regular binding prediction

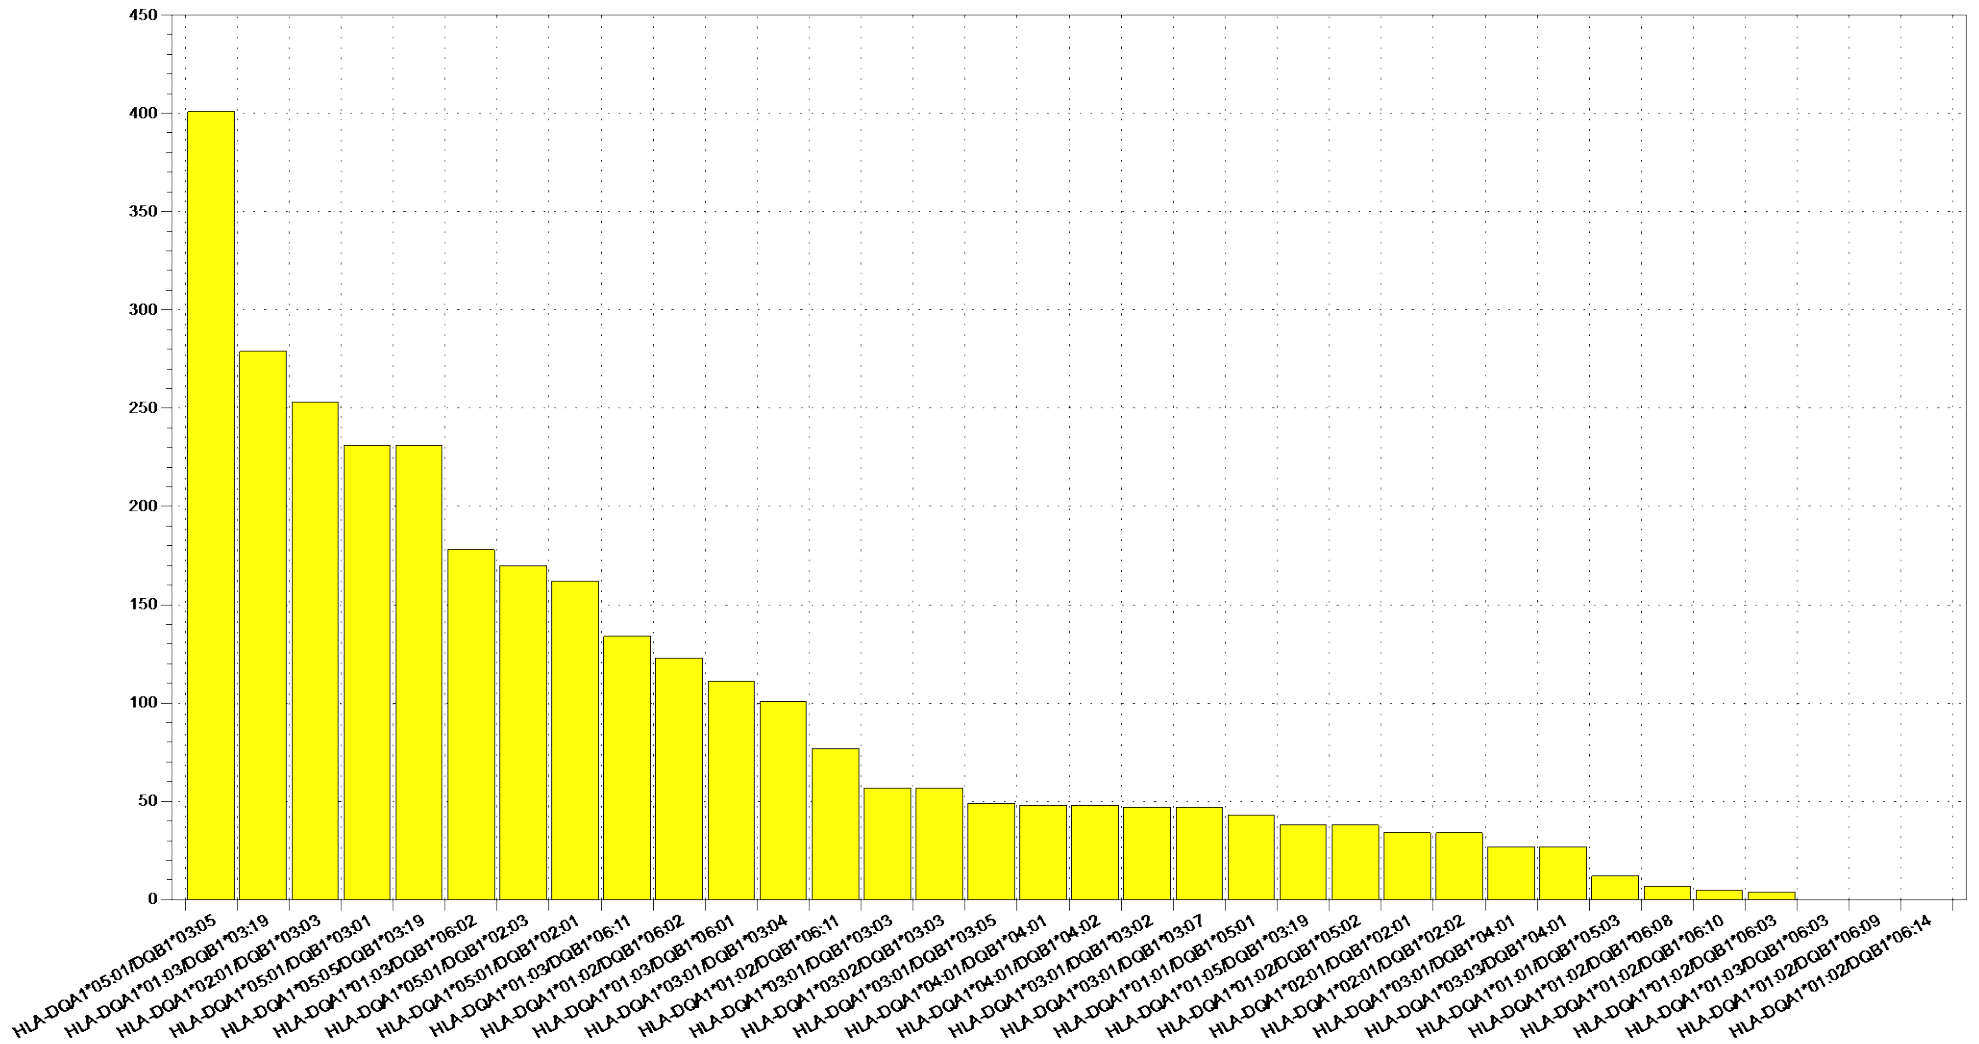

Allele combinations are ordered on the x-axis by their regular (50 nM < IC<sub>50</sub> ≤ 1000 nM) binding prediction and the number of peptides presented are displayed on the y-axis.

## HLA-DQA1/DQB1 alleles ordered by number of presented peptides with weak binding prediction

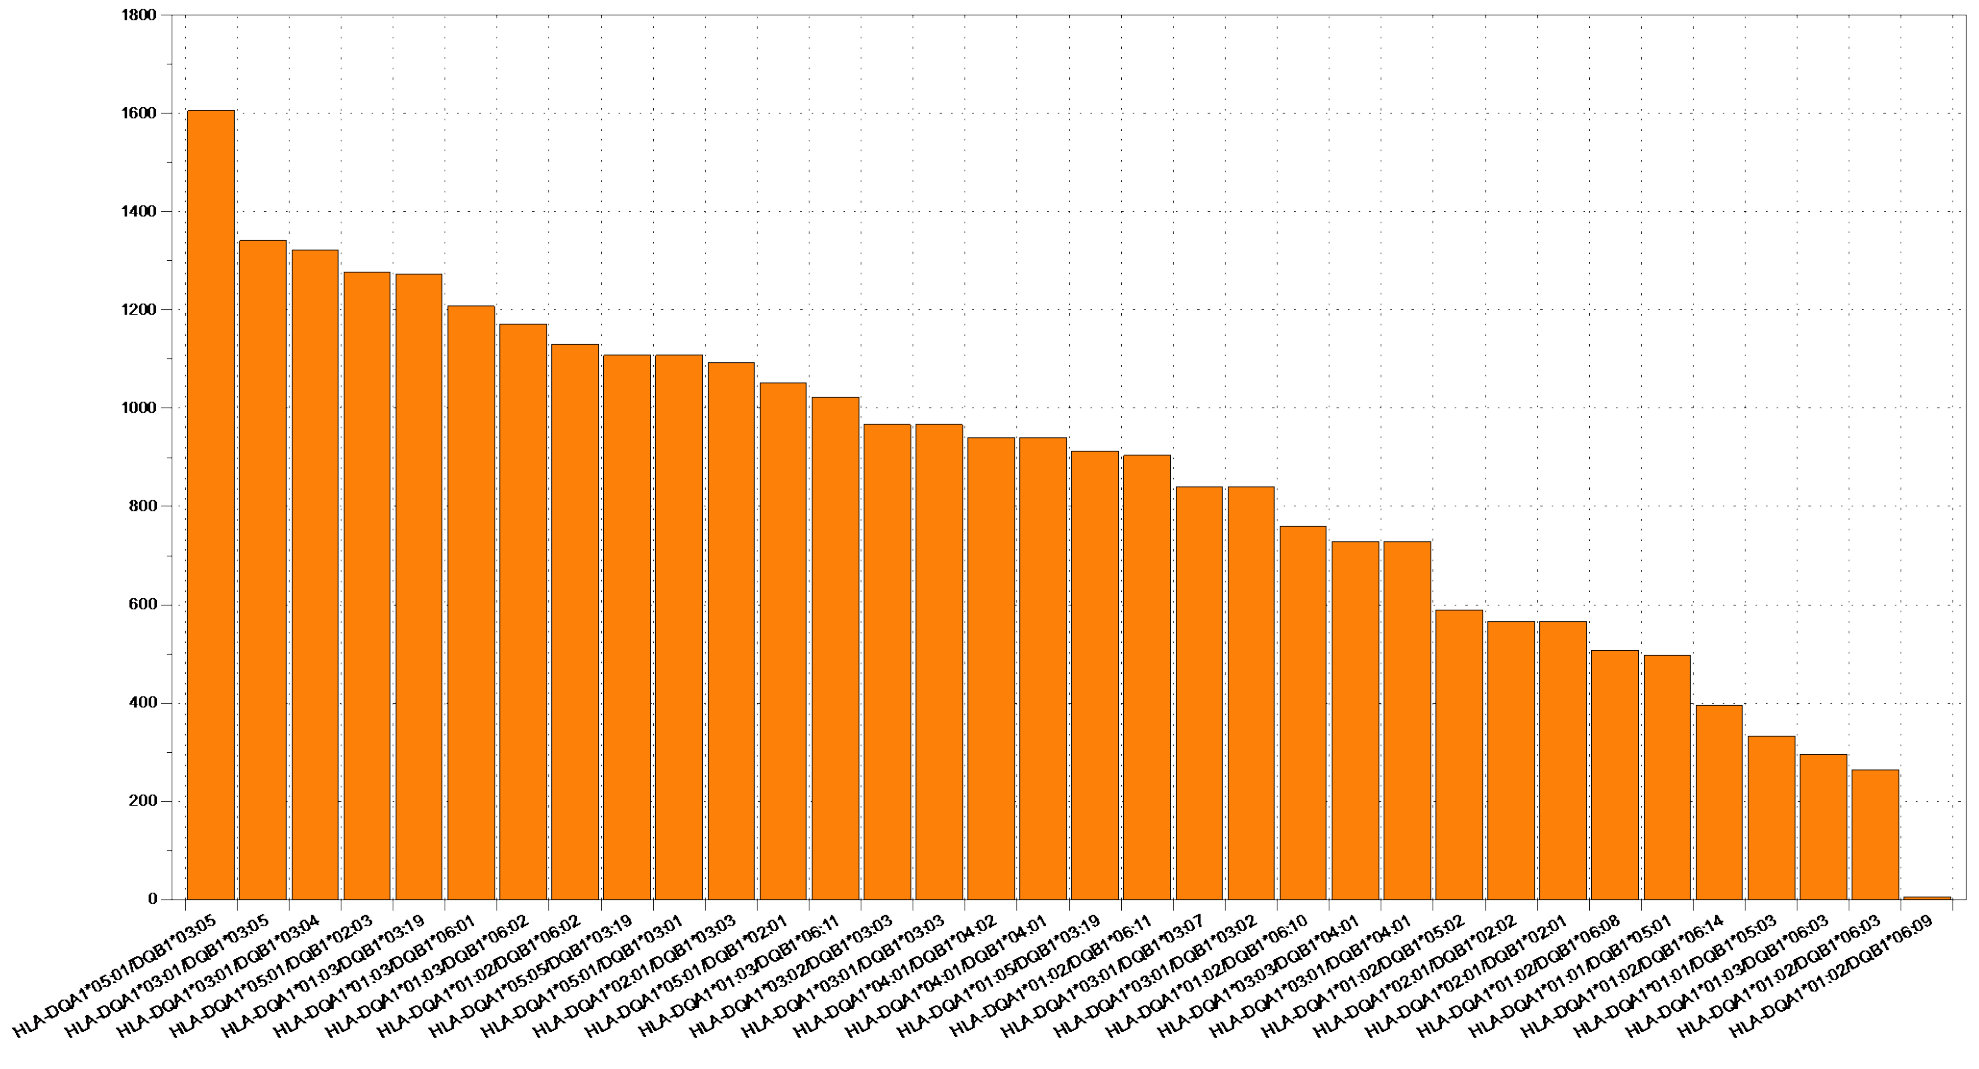

Allele combinations are ordered on the x-axis by their weak ( $1000 \text{ nM} < IC_{50} \leq 5000 \text{ nM}$ ) binding prediction and the number of peptides presented are displayed on the y-axis.
