# Supplementary material
Source: PubMed Central journal article supplement (PMC7300650)
Supplement: TAN-96-277-s004.pdf [file TAN-96-277-s004.pdf]

**Supplementary Table S1. Number of population samples tested for HLA per locus and geographic region**

| Geographic regions | HLA loci     |              |              |                 |                 |                 |
|--------------------|--------------|--------------|--------------|-----------------|-----------------|-----------------|
|                    | <i>HLA-A</i> | <i>HLA-B</i> | <i>HLA-C</i> | <i>HLA-DRB1</i> | <i>HLA-DQA1</i> | <i>HLA-DQB1</i> |
| <b>SAF</b>         | 27           | 24           | 18           | 12              | 9               | 13              |
| <b>NAF</b>         | 8            | 7            | 4            | 26              | 6               | 25              |
| <b>EUR</b>         | 32           | 34           | 25           | 73              | 45              | 83              |
| <b>SWA</b>         | 29           | 30           | 21           | 24              | 19              | 27              |
| <b>NEA</b>         | 30           | 26           | 19           | 68              | 36              | 52              |
| <b>SEA</b>         | 27           | 29           | 23           | 40              | 20              | 34              |
| <b>OCE</b>         | 35           | 34           | 25           | 70              | 14              | 27              |
| <b>AUS</b>         | 8            | 8            | 8            | 6               | 4               | 4               |
| <b>NAM</b>         | 15           | 15           | 11           | 24              | 21              | 25              |
| <b>SAM</b>         | 8            | 11           | 4            | 31              | 18              | 32              |
| <b>Total</b>       | 219          | 218          | 158          | 374             | 192             | 322             |

SAF: sub-Saharan Africa; NAF: North Africa; EUR: Europe; SWA: South-West Asia; NEA: North-East Asia; SEA: South-East Asia; OCE: Oceania; AUS: Australia; NAM: North America; SAM: South America
