# Supplementary material
Source: PubMed Central journal article supplement (PMC7300650)
Supplement: TAN-96-277-s005.pdf [file TAN-96-277-s005.pdf]

# Binding affinities of 438 HLA Class I and II proteins to the complete proteomes of seven (potentially) pandemic viruses and distributions of strongest and weakest HLA peptide binders in human populations worldwide

## Supplementary material 3

### Extended results for the binding predictions for MERS-CoV

#### Table of Contents

|                                                                                                            |    |
|------------------------------------------------------------------------------------------------------------|----|
| TOTAL NUMBER OF PEPTIDES WITH STRONG, REGULAR AND WEAK BINDING PREDICTIONS FOR <i>HLA-A</i> .....          | 2  |
| GENERAL BINDING PREDICTION TENDENCIES FOR <i>HLA-A</i> .....                                               | 4  |
| <i>HLA-A</i> ALLELES ORDERED BY NUMBER OF PRESENTED PEPTIDES WITH STRONG BINDING PREDICTION .....          | 5  |
| <i>HLA-A</i> ALLELES ORDERED BY NUMBER OF PRESENTED PEPTIDES WITH REGULAR BINDING PREDICTION.....          | 6  |
| <i>HLA-A</i> ALLELES ORDERED BY NUMBER OF PRESENTED PEPTIDES WITH WEAK BINDING PREDICTION.....             | 7  |
| TOTAL NUMBER OF PEPTIDES WITH STRONG, REGULAR AND WEAK BINDING PREDICTIONS FOR <i>HLA-B</i> .....          | 8  |
| GENERAL BINDING PREDICTION TENDENCIES FOR <i>HLA-B</i> .....                                               | 11 |
| <i>HLA-B</i> ALLELES ORDERED BY NUMBER OF PRESENTED PEPTIDES WITH STRONG BINDING PREDICTION .....          | 12 |
| <i>HLA-B</i> ALLELES ORDERED BY NUMBER OF PRESENTED PEPTIDES WITH REGULAR BINDING PREDICTION.....          | 13 |
| <i>HLA-B</i> ALLELES ORDERED BY NUMBER OF PRESENTED PEPTIDES WITH WEAK BINDING PREDICTION.....             | 14 |
| TOTAL NUMBER OF PEPTIDES WITH STRONG, REGULAR AND WEAK BINDING PREDICTIONS FOR <i>HLA-C</i> .....          | 15 |
| GENERAL BINDING PREDICTION TENDENCIES FOR <i>HLA-C</i> .....                                               | 16 |
| <i>HLA-C</i> ALLELES ORDERED BY NUMBER OF PRESENTED PEPTIDES WITH STRONG BINDING PREDICTION .....          | 17 |
| <i>HLA-C</i> ALLELES ORDERED BY NUMBER OF PRESENTED PEPTIDES WITH REGULAR BINDING PREDICTION.....          | 18 |
| <i>HLA-C</i> ALLELES ORDERED BY NUMBER OF PRESENTED PEPTIDES WITH WEAK BINDING PREDICTION .....            | 19 |
| TOTAL NUMBER OF PEPTIDES WITH STRONG, REGULAR AND WEAK BINDING PREDICTIONS FOR <i>HLA-DRB1</i> .....       | 20 |
| GENERAL BINDING PREDICTION TENDENCIES FOR <i>HLA-DRB1</i> .....                                            | 22 |
| <i>HLA-DRB1</i> ALLELES ORDERED BY NUMBER OF PRESENTED PEPTIDES WITH STRONG BINDING PREDICTION .....       | 23 |
| <i>HLA-DRB1</i> ALLELES ORDERED BY NUMBER OF PRESENTED PEPTIDES WITH REGULAR BINDING PREDICTION .....      | 24 |
| <i>HLA-DRB1</i> ALLELES ORDERED BY NUMBER OF PRESENTED PEPTIDES WITH WEAK BINDING PREDICTION .....         | 25 |
| TOTAL NUMBER OF PEPTIDES WITH STRONG, REGULAR AND WEAK BINDING PREDICTIONS FOR <i>HLA-DQA1/-DQB1</i> ....  | 26 |
| GENERAL BINDING PREDICTION TENDENCIES FOR <i>HLA-DQA1/-DQB1</i> .....                                      | 27 |
| <i>HLA-DQA1/-DQB1</i> ALLELES ORDERED BY NUMBER OF PRESENTED PEPTIDES WITH STRONG BINDING PREDICTION ..... | 28 |
| <i>HLA-DQA1/-DQB1</i> ALLELES ORDERED BY NUMBER OF PRESENTED PEPTIDES WITH REGULAR BINDING PREDICTION....  | 29 |
| <i>HLA-DQA1/-DQB1</i> ALLELES ORDERED BY NUMBER OF PRESENTED PEPTIDES WITH WEAK BINDING PREDICTION .....   | 30 |

## Total number of peptides with strong, regular and weak binding predictions for *HLA-A*

|             | <b>IC<sub>50</sub> ≤ 50 nM</b><br>Strong binders | <b>50 nM &lt; IC<sub>50</sub> ≤ 500 nM</b><br>Regular binders | <b>500 nM &lt; IC<sub>50</sub> ≤ 5000 nM</b><br>Weak binders | <b>IC<sub>50</sub> &gt; 5000 nM</b><br>Non binders |
|-------------|--------------------------------------------------|---------------------------------------------------------------|--------------------------------------------------------------|----------------------------------------------------|
| HLA-A*01:01 | 9                                                | 29                                                            | 194                                                          | 6838                                               |
| HLA-A*01:02 | 1                                                | 25                                                            | 288                                                          | 6756                                               |
| HLA-A*01:03 | 9                                                | 19                                                            | 170                                                          | 6872                                               |
| HLA-A*01:06 | 4                                                | 45                                                            | 208                                                          | 6813                                               |
| HLA-A*02:01 | 120                                              | 183                                                           | 497                                                          | 6270                                               |
| HLA-A*02:02 | 184                                              | 278                                                           | 811                                                          | 5797                                               |
| HLA-A*02:03 | 171                                              | 296                                                           | 687                                                          | 5916                                               |
| HLA-A*02:04 | 34                                               | 110                                                           | 345                                                          | 6581                                               |
| HLA-A*02:05 | 102                                              | 334                                                           | 955                                                          | 5679                                               |
| HLA-A*02:06 | 158                                              | 313                                                           | 891                                                          | 5708                                               |
| HLA-A*02:07 | 4                                                | 26                                                            | 145                                                          | 6895                                               |
| HLA-A*02:08 | 51                                               | 307                                                           | 946                                                          | 5766                                               |
| HLA-A*02:09 | 120                                              | 183                                                           | 497                                                          | 6270                                               |
| HLA-A*02:10 | 39                                               | 172                                                           | 577                                                          | 6282                                               |
| HLA-A*02:11 | 282                                              | 295                                                           | 725                                                          | 5768                                               |
| HLA-A*02:12 | 129                                              | 191                                                           | 466                                                          | 6284                                               |
| HLA-A*02:14 | 95                                               | 251                                                           | 847                                                          | 5877                                               |
| HLA-A*02:17 | 12                                               | 69                                                            | 319                                                          | 6670                                               |
| HLA-A*02:19 | 77                                               | 123                                                           | 356                                                          | 6514                                               |
| HLA-A*02:20 | 74                                               | 176                                                           | 502                                                          | 6318                                               |
| HLA-A*02:22 | 223                                              | 322                                                           | 818                                                          | 5707                                               |
| HLA-A*02:24 | 120                                              | 183                                                           | 497                                                          | 6270                                               |
| HLA-A*02:26 | 94                                               | 198                                                           | 506                                                          | 6272                                               |
| HLA-A*02:34 | 81                                               | 170                                                           | 490                                                          | 6329                                               |
| HLA-A*02:35 | 116                                              | 223                                                           | 647                                                          | 6084                                               |
| HLA-A*02:36 | 66                                               | 136                                                           | 374                                                          | 6494                                               |
| HLA-A*02:40 | 120                                              | 183                                                           | 497                                                          | 6270                                               |
| HLA-A*03:01 | 35                                               | 111                                                           | 272                                                          | 6652                                               |
| HLA-A*03:02 | 35                                               | 131                                                           | 333                                                          | 6571                                               |
| HLA-A*03:05 | 35                                               | 111                                                           | 272                                                          | 6652                                               |
| HLA-A*03:08 | 12                                               | 89                                                            | 280                                                          | 6689                                               |
| HLA-A*11:01 | 69                                               | 162                                                           | 361                                                          | 6478                                               |
| HLA-A*11:02 | 69                                               | 162                                                           | 361                                                          | 6478                                               |
| HLA-A*11:03 | 62                                               | 176                                                           | 417                                                          | 6415                                               |
| HLA-A*11:04 | 57                                               | 161                                                           | 340                                                          | 6512                                               |
| HLA-A*11:06 | 35                                               | 153                                                           | 404                                                          | 6478                                               |
| HLA-A*11:12 | 69                                               | 162                                                           | 361                                                          | 6478                                               |
| HLA-A*23:01 | 38                                               | 112                                                           | 339                                                          | 6581                                               |
| HLA-A*23:03 | 38                                               | 112                                                           | 339                                                          | 6581                                               |
| HLA-A*23:04 | 109                                              | 183                                                           | 601                                                          | 6177                                               |
| HLA-A*24:02 | 25                                               | 85                                                            | 252                                                          | 6708                                               |
| HLA-A*24:03 | 92                                               | 154                                                           | 472                                                          | 6352                                               |
| HLA-A*24:04 | 4                                                | 70                                                            | 279                                                          | 6717                                               |
| HLA-A*24:05 | 25                                               | 85                                                            | 252                                                          | 6708                                               |
| HLA-A*24:06 | 15                                               | 94                                                            | 327                                                          | 6634                                               |
| HLA-A*24:07 | 9                                                | 68                                                            | 246                                                          | 6747                                               |
| HLA-A*24:08 | 3                                                | 77                                                            | 308                                                          | 6682                                               |
| HLA-A*24:10 | 85                                               | 153                                                           | 544                                                          | 6288                                               |
| HLA-A*24:13 | 38                                               | 112                                                           | 339                                                          | 6581                                               |
| HLA-A*24:20 | 25                                               | 85                                                            | 252                                                          | 6708                                               |
| HLA-A*24:21 | 25                                               | 85                                                            | 252                                                          | 6708                                               |
| HLA-A*24:23 | 92                                               | 154                                                           | 472                                                          | 6352                                               |
| HLA-A*25:01 | 0                                                | 17                                                            | 137                                                          | 6916                                               |
| HLA-A*25:02 | 0                                                | 13                                                            | 153                                                          | 6904                                               |
| HLA-A*26:01 | 12                                               | 42                                                            | 244                                                          | 6772                                               |
| HLA-A*26:02 | 55                                               | 181                                                           | 570                                                          | 6264                                               |
| HLA-A*26:03 | 2                                                | 47                                                            | 341                                                          | 6680                                               |
| HLA-A*26:05 | 3                                                | 42                                                            | 261                                                          | 6764                                               |
| HLA-A*26:08 | 9                                                | 68                                                            | 379                                                          | 6614                                               |
| HLA-A*26:12 | 6                                                | 61                                                            | 340                                                          | 6663                                               |
| HLA-A*26:18 | 6                                                | 61                                                            | 340                                                          | 6663                                               |
| HLA-A*29:01 | 61                                               | 158                                                           | 423                                                          | 6428                                               |

|             | <b>IC<sub>50</sub> ≤ 50 nM</b><br><b>Strong binders</b> | <b>50 nM &lt; IC<sub>50</sub> ≤ 500 nM</b><br><b>Regular binders</b> | <b>500 nM &lt; IC<sub>50</sub> ≤ 5000 nM</b><br><b>Weak binders</b> | <b>IC<sub>50</sub> &gt; 5000 nM</b><br><b>Non binders</b> |
|-------------|---------------------------------------------------------|----------------------------------------------------------------------|---------------------------------------------------------------------|-----------------------------------------------------------|
| HLA-A*29:02 | 61                                                      | 158                                                                  | 423                                                                 | 6428                                                      |
| HLA-A*30:01 | 60                                                      | 283                                                                  | 1194                                                                | 5533                                                      |
| HLA-A*30:02 | 22                                                      | 145                                                                  | 475                                                                 | 6428                                                      |
| HLA-A*30:04 | 1                                                       | 73                                                                   | 824                                                                 | 6172                                                      |
| HLA-A*30:08 | 1                                                       | 71                                                                   | 495                                                                 | 6503                                                      |
| HLA-A*31:01 | 52                                                      | 145                                                                  | 454                                                                 | 6419                                                      |
| HLA-A*31:02 | 43                                                      | 136                                                                  | 509                                                                 | 6382                                                      |
| HLA-A*31:04 | 78                                                      | 212                                                                  | 528                                                                 | 6252                                                      |
| HLA-A*31:08 | 49                                                      | 198                                                                  | 811                                                                 | 6012                                                      |
| HLA-A*32:01 | 32                                                      | 160                                                                  | 601                                                                 | 6277                                                      |
| HLA-A*32:02 | 11                                                      | 122                                                                  | 533                                                                 | 6404                                                      |
| HLA-A*32:03 | 8                                                       | 96                                                                   | 495                                                                 | 6471                                                      |
| HLA-A*33:01 | 28                                                      | 69                                                                   | 249                                                                 | 6724                                                      |
| HLA-A*33:03 | 38                                                      | 98                                                                   | 307                                                                 | 6627                                                      |
| HLA-A*34:01 | 0                                                       | 106                                                                  | 735                                                                 | 6229                                                      |
| HLA-A*34:02 | 14                                                      | 167                                                                  | 473                                                                 | 6416                                                      |
| HLA-A*36:01 | 9                                                       | 55                                                                   | 324                                                                 | 6682                                                      |
| HLA-A*43:01 | 4                                                       | 48                                                                   | 357                                                                 | 6661                                                      |
| HLA-A*66:01 | 0                                                       | 41                                                                   | 447                                                                 | 6582                                                      |
| HLA-A*66:02 | 1                                                       | 79                                                                   | 641                                                                 | 6349                                                      |
| HLA-A*66:03 | 0                                                       | 60                                                                   | 490                                                                 | 6520                                                      |
| HLA-A*68:01 | 89                                                      | 191                                                                  | 546                                                                 | 6244                                                      |
| HLA-A*68:02 | 91                                                      | 303                                                                  | 714                                                                 | 5962                                                      |
| HLA-A*68:03 | 42                                                      | 156                                                                  | 419                                                                 | 6453                                                      |
| HLA-A*68:06 | 2                                                       | 74                                                                   | 657                                                                 | 6337                                                      |
| HLA-A*68:12 | 89                                                      | 191                                                                  | 546                                                                 | 6244                                                      |
| HLA-A*69:01 | 54                                                      | 223                                                                  | 626                                                                 | 6167                                                      |
| HLA-A*74:01 | 1                                                       | 39                                                                   | 236                                                                 | 6794                                                      |
| HLA-A*74:03 | 1                                                       | 39                                                                   | 236                                                                 | 6794                                                      |
| HLA-A*80:01 | 16                                                      | 58                                                                   | 175                                                                 | 6821                                                      |

Alleles are ordered alphabetically.

## General binding prediction tendencies for *HLA-A*

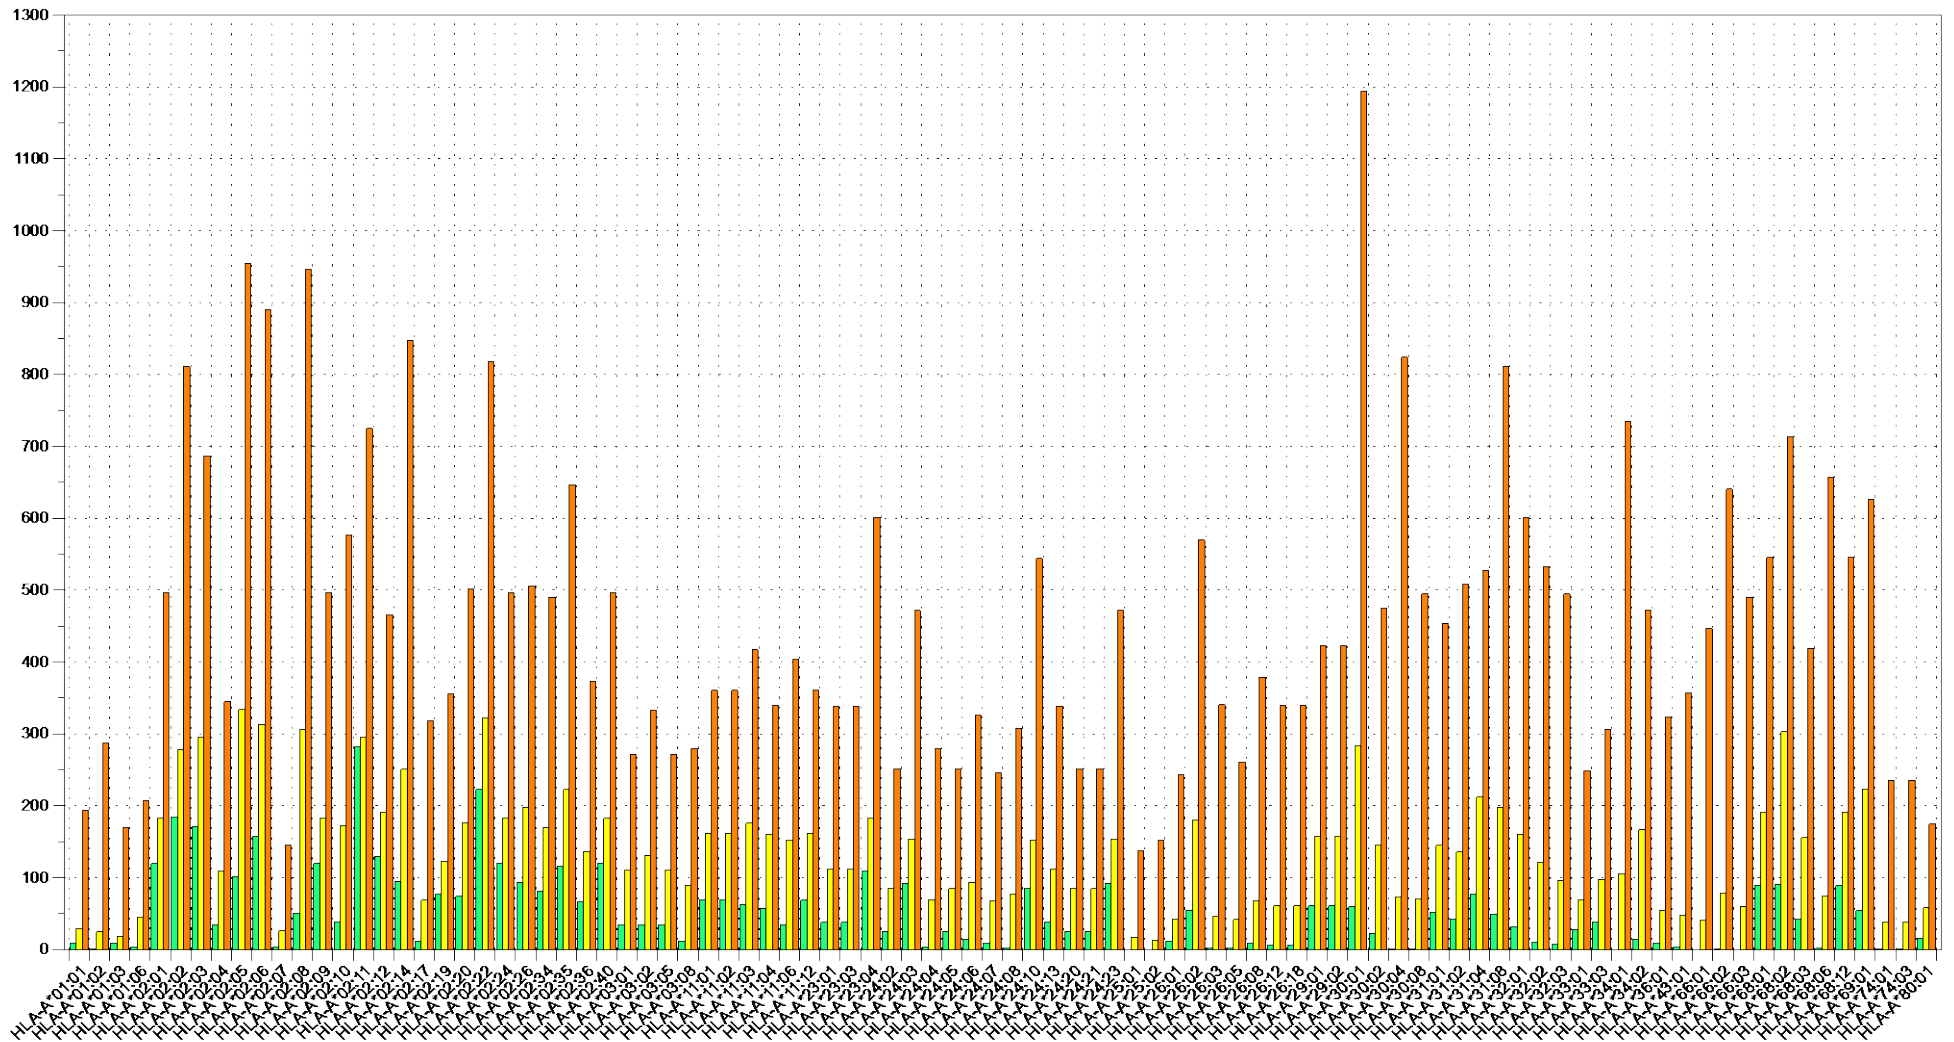

Alleles are ordered alphabetically on the x-axis, while the number of peptides binding with strong ( $IC_{50} \leq 50$  nM), regular ( $50$  nM  $< IC_{50} \leq 500$  nM) and weak ( $500$  nM  $< IC_{50} \leq 5000$  nM) binding prediction are displayed on the y-axis.



## HLA-A alleles ordered by number of presented peptides with regular binding prediction

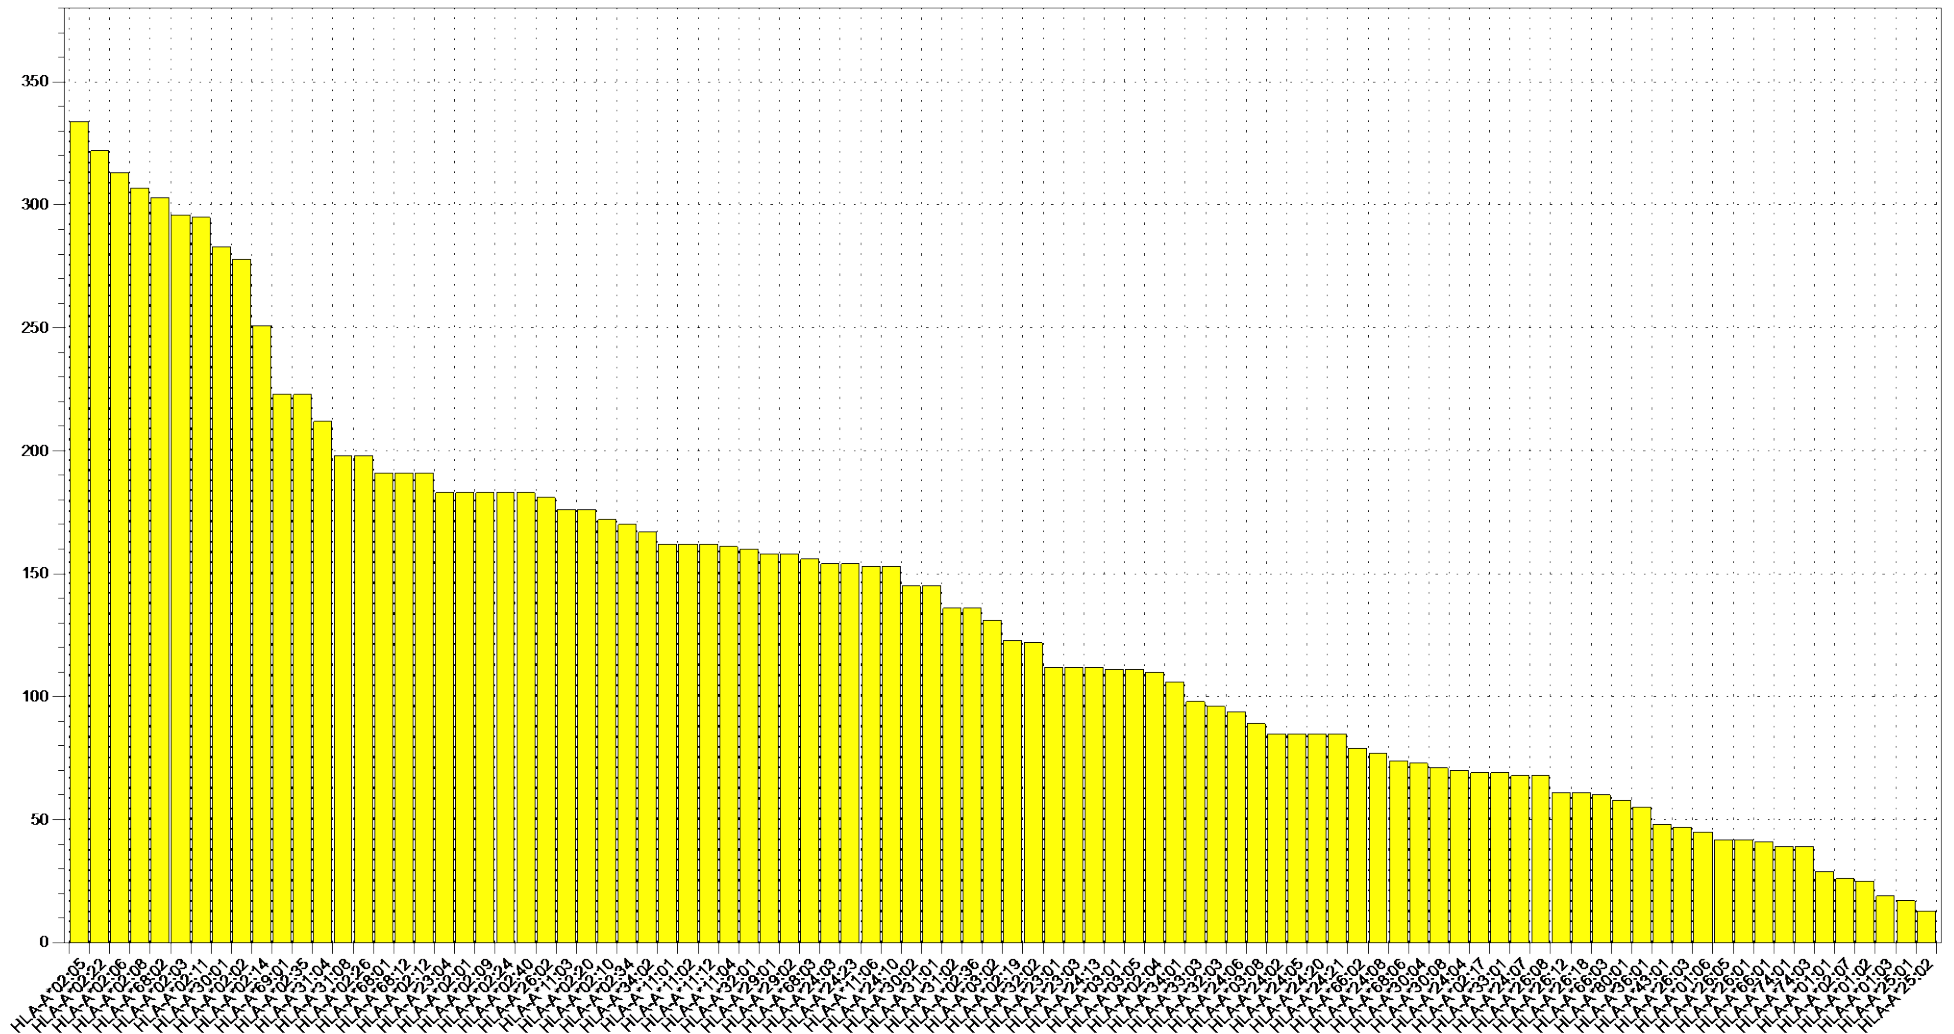

Alleles are ordered on the x-axis by their regular ( $50 \text{ nM} < IC_{50} \leq 500 \text{ nM}$ ) binding prediction and the number of peptides presented are displayed on the y-axis.

## HLA-A alleles ordered by number of presented peptides with weak binding prediction

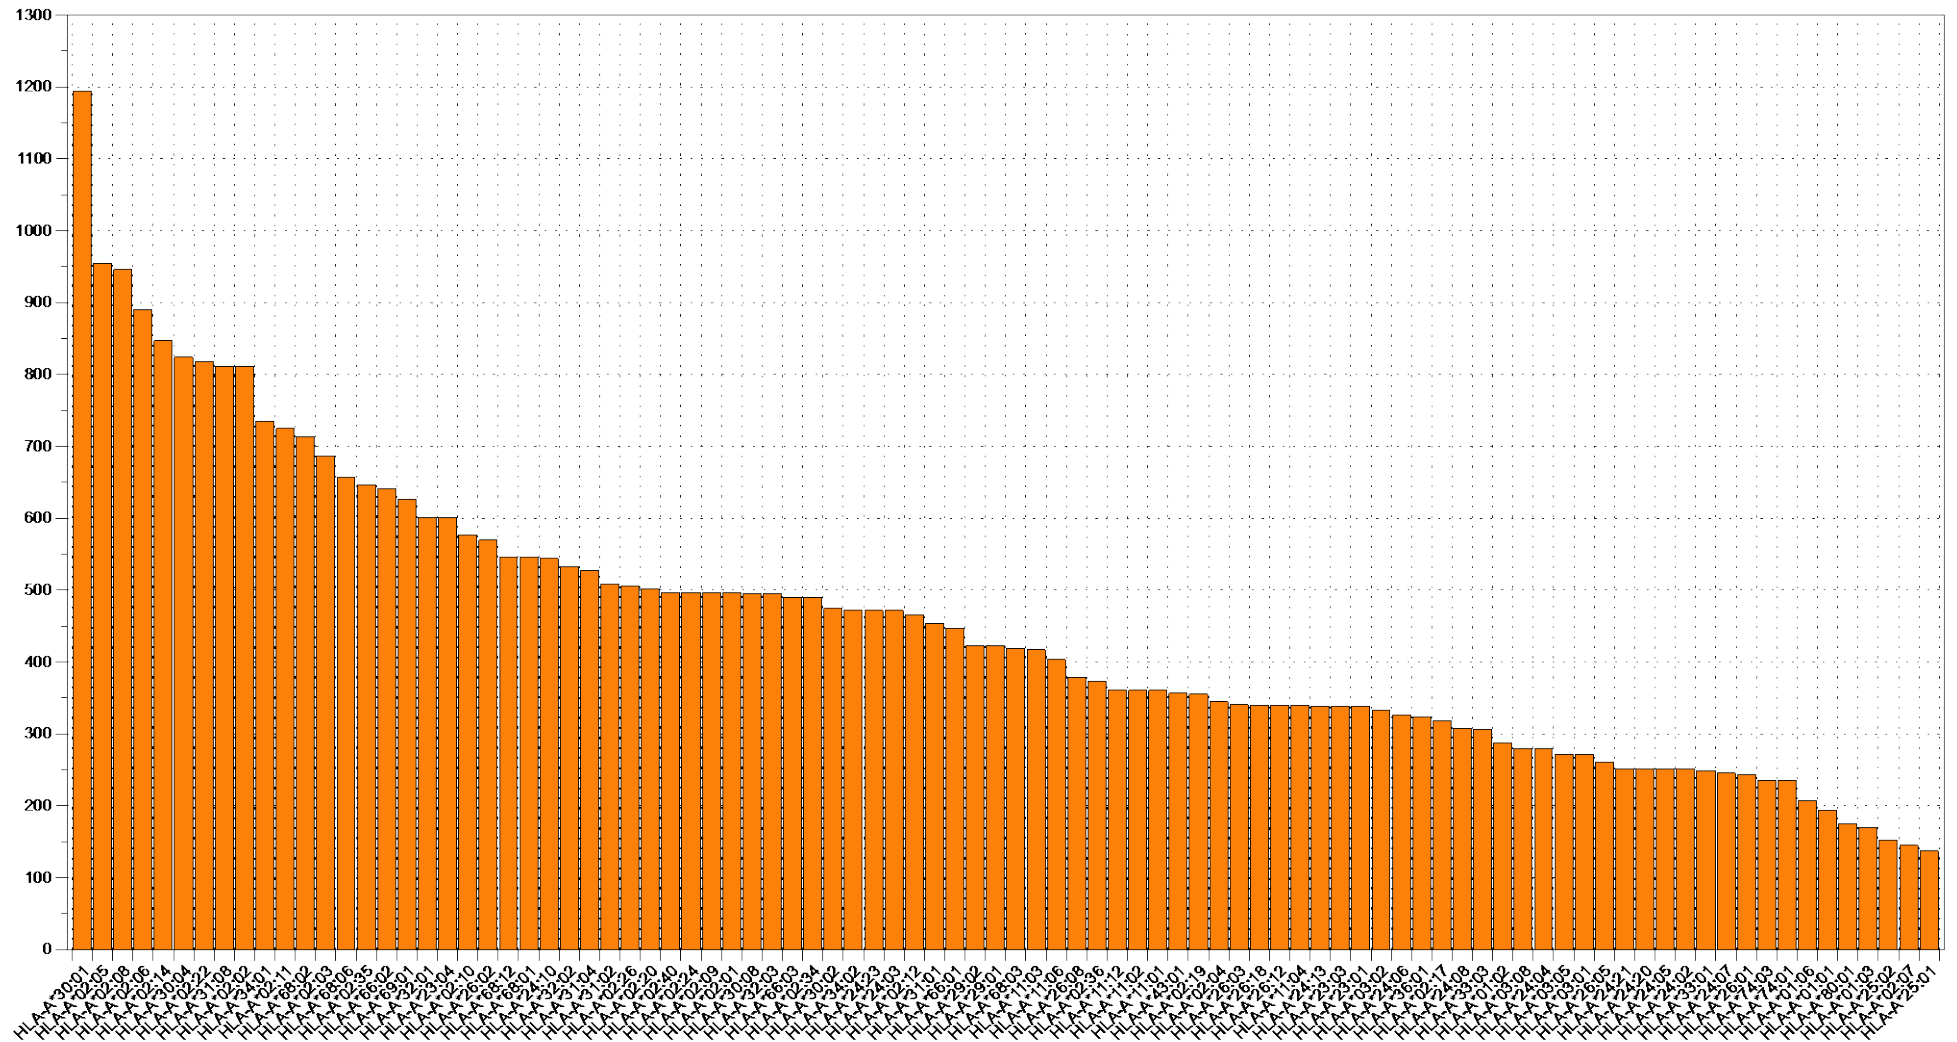

Alleles are ordered on the x-axis by their weak ( $500 \text{ nM} < \text{IC}_{50} \leq 5000 \text{ nM}$ ) binding prediction and the number of peptides presented are displayed on the y-axis.

## Total number of peptides with strong, regular and weak binding predictions for *HLA-B*

|             | <b>IC<sub>50</sub> ≤ 50 nM</b><br>Strong binders | <b>50 nM &lt; IC<sub>50</sub> ≤ 500 nM</b><br>Regular binders | <b>500 nM &lt; IC<sub>50</sub> ≤ 5000 nM</b><br>Weak binders | <b>IC<sub>50</sub> &gt; 5000 nM</b><br>Non binders |
|-------------|--------------------------------------------------|---------------------------------------------------------------|--------------------------------------------------------------|----------------------------------------------------|
| HLA-B*07:02 | 23                                               | 53                                                            | 234                                                          | 6760                                               |
| HLA-B*07:04 | 16                                               | 52                                                            | 265                                                          | 6737                                               |
| HLA-B*07:05 | 30                                               | 64                                                            | 278                                                          | 6698                                               |
| HLA-B*07:06 | 30                                               | 64                                                            | 278                                                          | 6698                                               |
| HLA-B*08:01 | 13                                               | 70                                                            | 469                                                          | 6518                                               |
| HLA-B*08:03 | 0                                                | 0                                                             | 44                                                           | 7026                                               |
| HLA-B*08:04 | 0                                                | 30                                                            | 378                                                          | 6662                                               |
| HLA-B*08:05 | 3                                                | 37                                                            | 356                                                          | 6674                                               |
| HLA-B*13:01 | 3                                                | 93                                                            | 678                                                          | 6296                                               |
| HLA-B*13:02 | 0                                                | 19                                                            | 357                                                          | 6694                                               |
| HLA-B*13:03 | 0                                                | 19                                                            | 430                                                          | 6621                                               |
| HLA-B*13:04 | 0                                                | 36                                                            | 678                                                          | 6356                                               |
| HLA-B*14:01 | 0                                                | 12                                                            | 196                                                          | 6862                                               |
| HLA-B*14:02 | 0                                                | 12                                                            | 196                                                          | 6862                                               |
| HLA-B*14:03 | 0                                                | 8                                                             | 245                                                          | 6817                                               |
| HLA-B*15:01 | 54                                               | 210                                                           | 710                                                          | 6096                                               |
| HLA-B*15:02 | 25                                               | 188                                                           | 592                                                          | 6265                                               |
| HLA-B*15:03 | 204                                              | 484                                                           | 1220                                                         | 5162                                               |
| HLA-B*15:04 | 0                                                | 39                                                            | 676                                                          | 6355                                               |
| HLA-B*15:05 | 43                                               | 245                                                           | 861                                                          | 5921                                               |
| HLA-B*15:06 | 56                                               | 234                                                           | 738                                                          | 6042                                               |
| HLA-B*15:07 | 22                                               | 166                                                           | 675                                                          | 6207                                               |
| HLA-B*15:08 | 2                                                | 57                                                            | 377                                                          | 6634                                               |
| HLA-B*15:09 | 2                                                | 11                                                            | 117                                                          | 6940                                               |
| HLA-B*15:10 | 2                                                | 8                                                             | 114                                                          | 6946                                               |
| HLA-B*15:11 | 2                                                | 57                                                            | 375                                                          | 6636                                               |
| HLA-B*15:12 | 2                                                | 85                                                            | 462                                                          | 6521                                               |
| HLA-B*15:13 | 0                                                | 34                                                            | 524                                                          | 6512                                               |
| HLA-B*15:15 | 11                                               | 140                                                           | 545                                                          | 6374                                               |
| HLA-B*15:16 | 34                                               | 243                                                           | 701                                                          | 6092                                               |
| HLA-B*15:17 | 165                                              | 308                                                           | 597                                                          | 6000                                               |
| HLA-B*15:18 | 6                                                | 50                                                            | 437                                                          | 6577                                               |
| HLA-B*15:20 | 49                                               | 236                                                           | 844                                                          | 5941                                               |
| HLA-B*15:21 | 2                                                | 28                                                            | 307                                                          | 6733                                               |
| HLA-B*15:24 | 0                                                | 58                                                            | 584                                                          | 6428                                               |
| HLA-B*15:25 | 91                                               | 282                                                           | 818                                                          | 5879                                               |
| HLA-B*15:27 | 29                                               | 167                                                           | 571                                                          | 6303                                               |
| HLA-B*15:29 | 62                                               | 325                                                           | 973                                                          | 5710                                               |
| HLA-B*15:31 | 15                                               | 171                                                           | 678                                                          | 6206                                               |
| HLA-B*15:32 | 41                                               | 229                                                           | 886                                                          | 5914                                               |
| HLA-B*15:34 | 54                                               | 210                                                           | 710                                                          | 6096                                               |
| HLA-B*15:35 | 18                                               | 152                                                           | 616                                                          | 6284                                               |
| HLA-B*15:38 | 33                                               | 224                                                           | 770                                                          | 6043                                               |
| HLA-B*15:39 | 96                                               | 279                                                           | 855                                                          | 5840                                               |
| HLA-B*15:40 | 14                                               | 127                                                           | 593                                                          | 6336                                               |
| HLA-B*15:58 | 0                                                | 20                                                            | 337                                                          | 6713                                               |
| HLA-B*18:01 | 11                                               | 33                                                            | 233                                                          | 6793                                               |
| HLA-B*18:02 | 5                                                | 36                                                            | 349                                                          | 6680                                               |
| HLA-B*18:03 | 3                                                | 32                                                            | 286                                                          | 6749                                               |
| HLA-B*18:05 | 11                                               | 33                                                            | 233                                                          | 6793                                               |
| HLA-B*18:07 | 4                                                | 28                                                            | 367                                                          | 6671                                               |
| HLA-B*27:02 | 0                                                | 9                                                             | 64                                                           | 6997                                               |
| HLA-B*27:03 | 0                                                | 2                                                             | 41                                                           | 7027                                               |
| HLA-B*27:04 | 0                                                | 11                                                            | 97                                                           | 6962                                               |
| HLA-B*27:05 | 5                                                | 55                                                            | 180                                                          | 6830                                               |
| HLA-B*27:06 | 10                                               | 65                                                            | 227                                                          | 6768                                               |
| HLA-B*27:07 | 23                                               | 90                                                            | 362                                                          | 6595                                               |
| HLA-B*27:08 | 8                                                | 53                                                            | 205                                                          | 6804                                               |
| HLA-B*27:09 | 9                                                | 68                                                            | 236                                                          | 6757                                               |
| HLA-B*27:12 | 8                                                | 74                                                            | 311                                                          | 6677                                               |
| HLA-B*27:14 | 0                                                | 15                                                            | 137                                                          | 6918                                               |
| HLA-B*35:01 | 55                                               | 185                                                           | 562                                                          | 6268                                               |



|             | IC <sub>50</sub> ≤ 50 nM<br>Strong binders | 50 nM < IC <sub>50</sub> ≤ 500 nM<br>Regular binders | 500 nM < IC <sub>50</sub> ≤ 5000 nM<br>Weak binders | IC <sub>50</sub> > 5000 nM<br>Non binders |
|-------------|--------------------------------------------|------------------------------------------------------|-----------------------------------------------------|-------------------------------------------|
| HLA-B*35:02 | 3                                          | 41                                                   | 205                                                 | 6821                                      |
| HLA-B*35:03 | 3                                          | 30                                                   | 118                                                 | 6919                                      |
| HLA-B*35:04 | 3                                          | 41                                                   | 205                                                 | 6821                                      |
| HLA-B*35:05 | 34                                         | 206                                                  | 700                                                 | 6130                                      |
| HLA-B*35:06 | 1                                          | 19                                                   | 111                                                 | 6939                                      |
| HLA-B*35:08 | 13                                         | 61                                                   | 360                                                 | 6636                                      |
| HLA-B*35:09 | 3                                          | 41                                                   | 205                                                 | 6821                                      |
| HLA-B*35:10 | 146                                        | 384                                                  | 1028                                                | 5512                                      |
| HLA-B*35:11 | 56                                         | 236                                                  | 719                                                 | 6059                                      |
| HLA-B*35:12 | 3                                          | 41                                                   | 205                                                 | 6821                                      |
| HLA-B*35:17 | 31                                         | 178                                                  | 636                                                 | 6225                                      |
| HLA-B*35:19 | 60                                         | 267                                                  | 731                                                 | 6012                                      |
| HLA-B*35:20 | 21                                         | 193                                                  | 738                                                 | 6118                                      |
| HLA-B*35:21 | 35                                         | 216                                                  | 710                                                 | 6109                                      |
| HLA-B*35:32 | 58                                         | 219                                                  | 605                                                 | 6188                                      |
| HLA-B*35:43 | 12                                         | 153                                                  | 632                                                 | 6273                                      |
| HLA-B*37:01 | 0                                          | 23                                                   | 213                                                 | 6834                                      |
| HLA-B*38:01 | 1                                          | 27                                                   | 171                                                 | 6871                                      |
| HLA-B*38:02 | 1                                          | 28                                                   | 177                                                 | 6864                                      |
| HLA-B*39:01 | 20                                         | 102                                                  | 387                                                 | 6561                                      |
| HLA-B*39:02 | 40                                         | 194                                                  | 873                                                 | 5963                                      |
| HLA-B*39:03 | 18                                         | 91                                                   | 438                                                 | 6523                                      |
| HLA-B*39:04 | 20                                         | 102                                                  | 387                                                 | 6561                                      |
| HLA-B*39:05 | 6                                          | 31                                                   | 197                                                 | 6836                                      |
| HLA-B*39:06 | 7                                          | 45                                                   | 263                                                 | 6755                                      |
| HLA-B*39:07 | 12                                         | 87                                                   | 596                                                 | 6375                                      |
| HLA-B*39:09 | 11                                         | 111                                                  | 472                                                 | 6476                                      |
| HLA-B*39:10 | 24                                         | 119                                                  | 542                                                 | 6385                                      |
| HLA-B*39:15 | 14                                         | 77                                                   | 352                                                 | 6627                                      |
| HLA-B*39:24 | 18                                         | 91                                                   | 438                                                 | 6523                                      |
| HLA-B*40:01 | 18                                         | 51                                                   | 124                                                 | 6877                                      |
| HLA-B*40:02 | 26                                         | 89                                                   | 245                                                 | 6710                                      |
| HLA-B*40:03 | 9                                          | 69                                                   | 329                                                 | 6663                                      |
| HLA-B*40:04 | 28                                         | 78                                                   | 217                                                 | 6747                                      |
| HLA-B*40:05 | 11                                         | 71                                                   | 372                                                 | 6616                                      |
| HLA-B*40:06 | 4                                          | 51                                                   | 154                                                 | 6861                                      |
| HLA-B*40:09 | 20                                         | 77                                                   | 225                                                 | 6748                                      |
| HLA-B*40:10 | 1                                          | 36                                                   | 141                                                 | 6892                                      |
| HLA-B*40:11 | 29                                         | 79                                                   | 210                                                 | 6752                                      |
| HLA-B*40:12 | 1                                          | 28                                                   | 140                                                 | 6901                                      |
| HLA-B*40:14 | 29                                         | 79                                                   | 210                                                 | 6752                                      |
| HLA-B*40:16 | 3                                          | 67                                                   | 250                                                 | 6750                                      |
| HLA-B*40:40 | 12                                         | 72                                                   | 387                                                 | 6599                                      |
| HLA-B*41:01 | 12                                         | 72                                                   | 206                                                 | 6780                                      |
| HLA-B*41:02 | 22                                         | 79                                                   | 294                                                 | 6675                                      |
| HLA-B*42:01 | 45                                         | 100                                                  | 518                                                 | 6407                                      |
| HLA-B*42:02 | 6                                          | 50                                                   | 336                                                 | 6678                                      |
| HLA-B*44:02 | 4                                          | 28                                                   | 119                                                 | 6919                                      |
| HLA-B*44:03 | 4                                          | 32                                                   | 118                                                 | 6916                                      |
| HLA-B*44:04 | 0                                          | 19                                                   | 90                                                  | 6961                                      |
| HLA-B*44:05 | 0                                          | 11                                                   | 79                                                  | 6980                                      |
| HLA-B*44:06 | 0                                          | 1                                                    | 62                                                  | 7007                                      |
| HLA-B*44:07 | 4                                          | 32                                                   | 118                                                 | 6916                                      |
| HLA-B*44:09 | 6                                          | 56                                                   | 288                                                 | 6720                                      |
| HLA-B*44:15 | 0                                          | 21                                                   | 103                                                 | 6946                                      |
| HLA-B*45:01 | 8                                          | 53                                                   | 147                                                 | 6862                                      |
| HLA-B*46:01 | 1                                          | 2                                                    | 91                                                  | 6976                                      |
| HLA-B*47:01 | 0                                          | 38                                                   | 434                                                 | 6598                                      |
| HLA-B*47:03 | 2                                          | 63                                                   | 389                                                 | 6616                                      |
| HLA-B*48:01 | 0                                          | 19                                                   | 106                                                 | 6945                                      |
| HLA-B*48:02 | 94                                         | 333                                                  | 1080                                                | 5563                                      |
| HLA-B*48:03 | 1                                          | 28                                                   | 140                                                 | 6901                                      |
| HLA-B*48:04 | 0                                          | 19                                                   | 106                                                 | 6945                                      |
| HLA-B*49:01 | 2                                          | 30                                                   | 125                                                 | 6913                                      |
| HLA-B*50:01 | 8                                          | 54                                                   | 221                                                 | 6787                                      |

|             | <b>IC<sub>50</sub> ≤ 50 nM</b><br><b>Strong binders</b> | <b>50 nM &lt; IC<sub>50</sub> ≤ 500 nM</b><br><b>Regular binders</b> | <b>500 nM &lt; IC<sub>50</sub> ≤ 5000 nM</b><br><b>Weak binders</b> | <b>IC<sub>50</sub> &gt; 5000 nM</b><br><b>Non binders</b> |
|-------------|---------------------------------------------------------|----------------------------------------------------------------------|---------------------------------------------------------------------|-----------------------------------------------------------|
| HLA-B*50:02 | 0                                                       | 30                                                                   | 118                                                                 | 6922                                                      |
| HLA-B*51:01 | 1                                                       | 22                                                                   | 121                                                                 | 6926                                                      |
| HLA-B*51:02 | 1                                                       | 33                                                                   | 152                                                                 | 6884                                                      |
| HLA-B*51:04 | 0                                                       | 19                                                                   | 161                                                                 | 6890                                                      |
| HLA-B*51:05 | 0                                                       | 6                                                                    | 78                                                                  | 6986                                                      |
| HLA-B*51:06 | 0                                                       | 21                                                                   | 184                                                                 | 6865                                                      |
| HLA-B*51:07 | 0                                                       | 0                                                                    | 60                                                                  | 7010                                                      |
| HLA-B*51:08 | 0                                                       | 9                                                                    | 108                                                                 | 6953                                                      |
| HLA-B*51:09 | 0                                                       | 14                                                                   | 125                                                                 | 6931                                                      |
| HLA-B*52:01 | 0                                                       | 4                                                                    | 143                                                                 | 6923                                                      |
| HLA-B*53:01 | 11                                                      | 76                                                                   | 358                                                                 | 6625                                                      |
| HLA-B*53:02 | 5                                                       | 57                                                                   | 350                                                                 | 6658                                                      |
| HLA-B*53:03 | 22                                                      | 150                                                                  | 774                                                                 | 6124                                                      |
| HLA-B*53:05 | 12                                                      | 81                                                                   | 379                                                                 | 6598                                                      |
| HLA-B*54:01 | 21                                                      | 42                                                                   | 236                                                                 | 6771                                                      |
| HLA-B*55:01 | 3                                                       | 41                                                                   | 206                                                                 | 6820                                                      |
| HLA-B*55:02 | 21                                                      | 52                                                                   | 341                                                                 | 6656                                                      |
| HLA-B*55:04 | 53                                                      | 126                                                                  | 606                                                                 | 6285                                                      |
| HLA-B*55:07 | 21                                                      | 42                                                                   | 236                                                                 | 6771                                                      |
| HLA-B*55:12 | 12                                                      | 54                                                                   | 336                                                                 | 6668                                                      |
| HLA-B*56:01 | 13                                                      | 51                                                                   | 296                                                                 | 6710                                                      |
| HLA-B*56:02 | 20                                                      | 92                                                                   | 471                                                                 | 6487                                                      |
| HLA-B*56:03 | 5                                                       | 125                                                                  | 783                                                                 | 6157                                                      |
| HLA-B*56:04 | 20                                                      | 92                                                                   | 471                                                                 | 6487                                                      |
| HLA-B*57:01 | 18                                                      | 60                                                                   | 378                                                                 | 6614                                                      |
| HLA-B*57:02 | 8                                                       | 57                                                                   | 292                                                                 | 6713                                                      |
| HLA-B*57:03 | 21                                                      | 107                                                                  | 420                                                                 | 6522                                                      |
| HLA-B*58:01 | 32                                                      | 142                                                                  | 566                                                                 | 6330                                                      |
| HLA-B*58:02 | 0                                                       | 6                                                                    | 42                                                                  | 7022                                                      |
| HLA-B*59:01 | 0                                                       | 32                                                                   | 267                                                                 | 6771                                                      |
| HLA-B*67:01 | 30                                                      | 83                                                                   | 403                                                                 | 6554                                                      |
| HLA-B*73:01 | 0                                                       | 8                                                                    | 99                                                                  | 6963                                                      |
| HLA-B*78:01 | 0                                                       | 33                                                                   | 238                                                                 | 6799                                                      |
| HLA-B*78:02 | 0                                                       | 15                                                                   | 164                                                                 | 6891                                                      |
| HLA-B*81:01 | 6                                                       | 34                                                                   | 153                                                                 | 6877                                                      |
| HLA-B*82:01 | 0                                                       | 9                                                                    | 116                                                                 | 6945                                                      |
| HLA-B*82:02 | 0                                                       | 9                                                                    | 116                                                                 | 6945                                                      |

Alleles are ordered alphabetically.

## General binding prediction tendencies for *HLA-B*

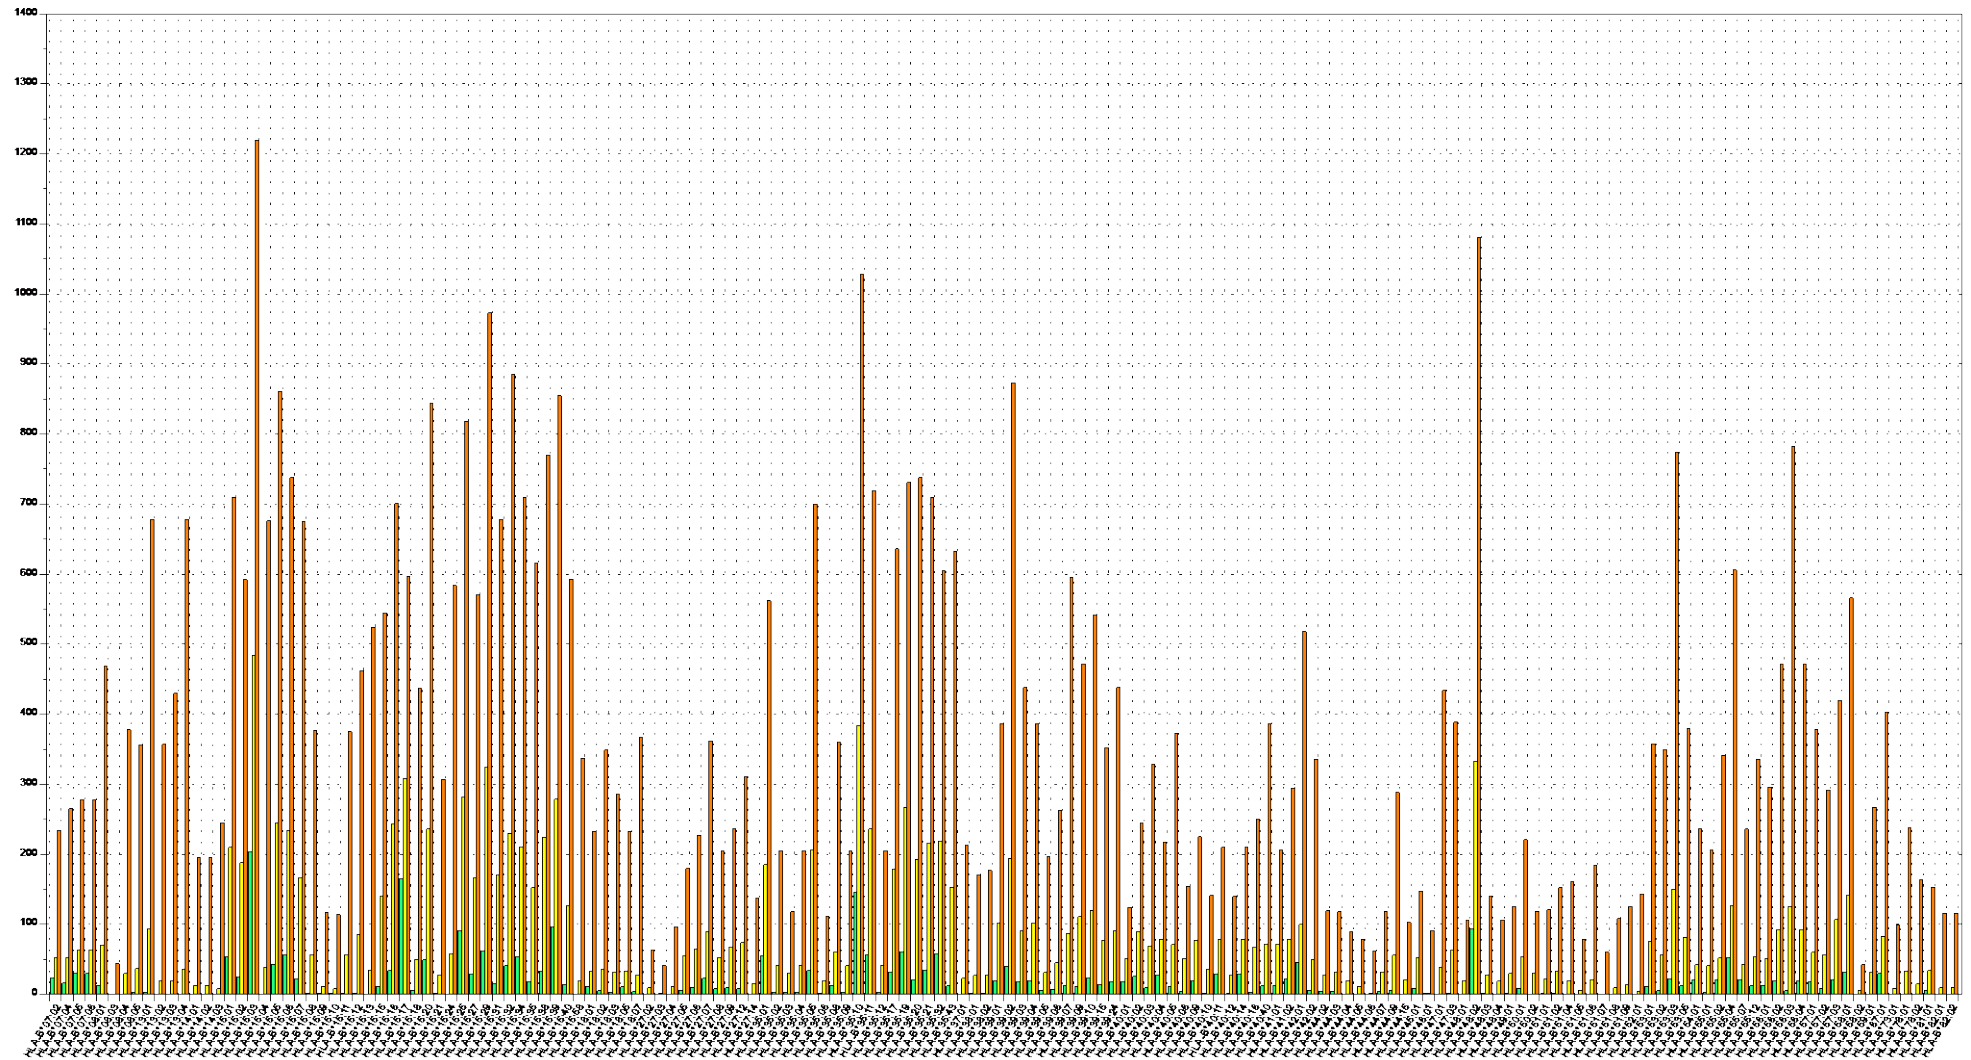

Alleles are ordered alphabetically on the x-axis, while the number of peptides binding with strong ( $IC_{50} \leq 50$  nM), regular ( $50$  nM  $< IC_{50} \leq 500$  nM) and weak ( $500$  nM  $< IC_{50} \leq 5000$  nM) binding prediction are displayed on the y-axis.

## HLA-B alleles ordered by number of presented peptides with strong binding prediction

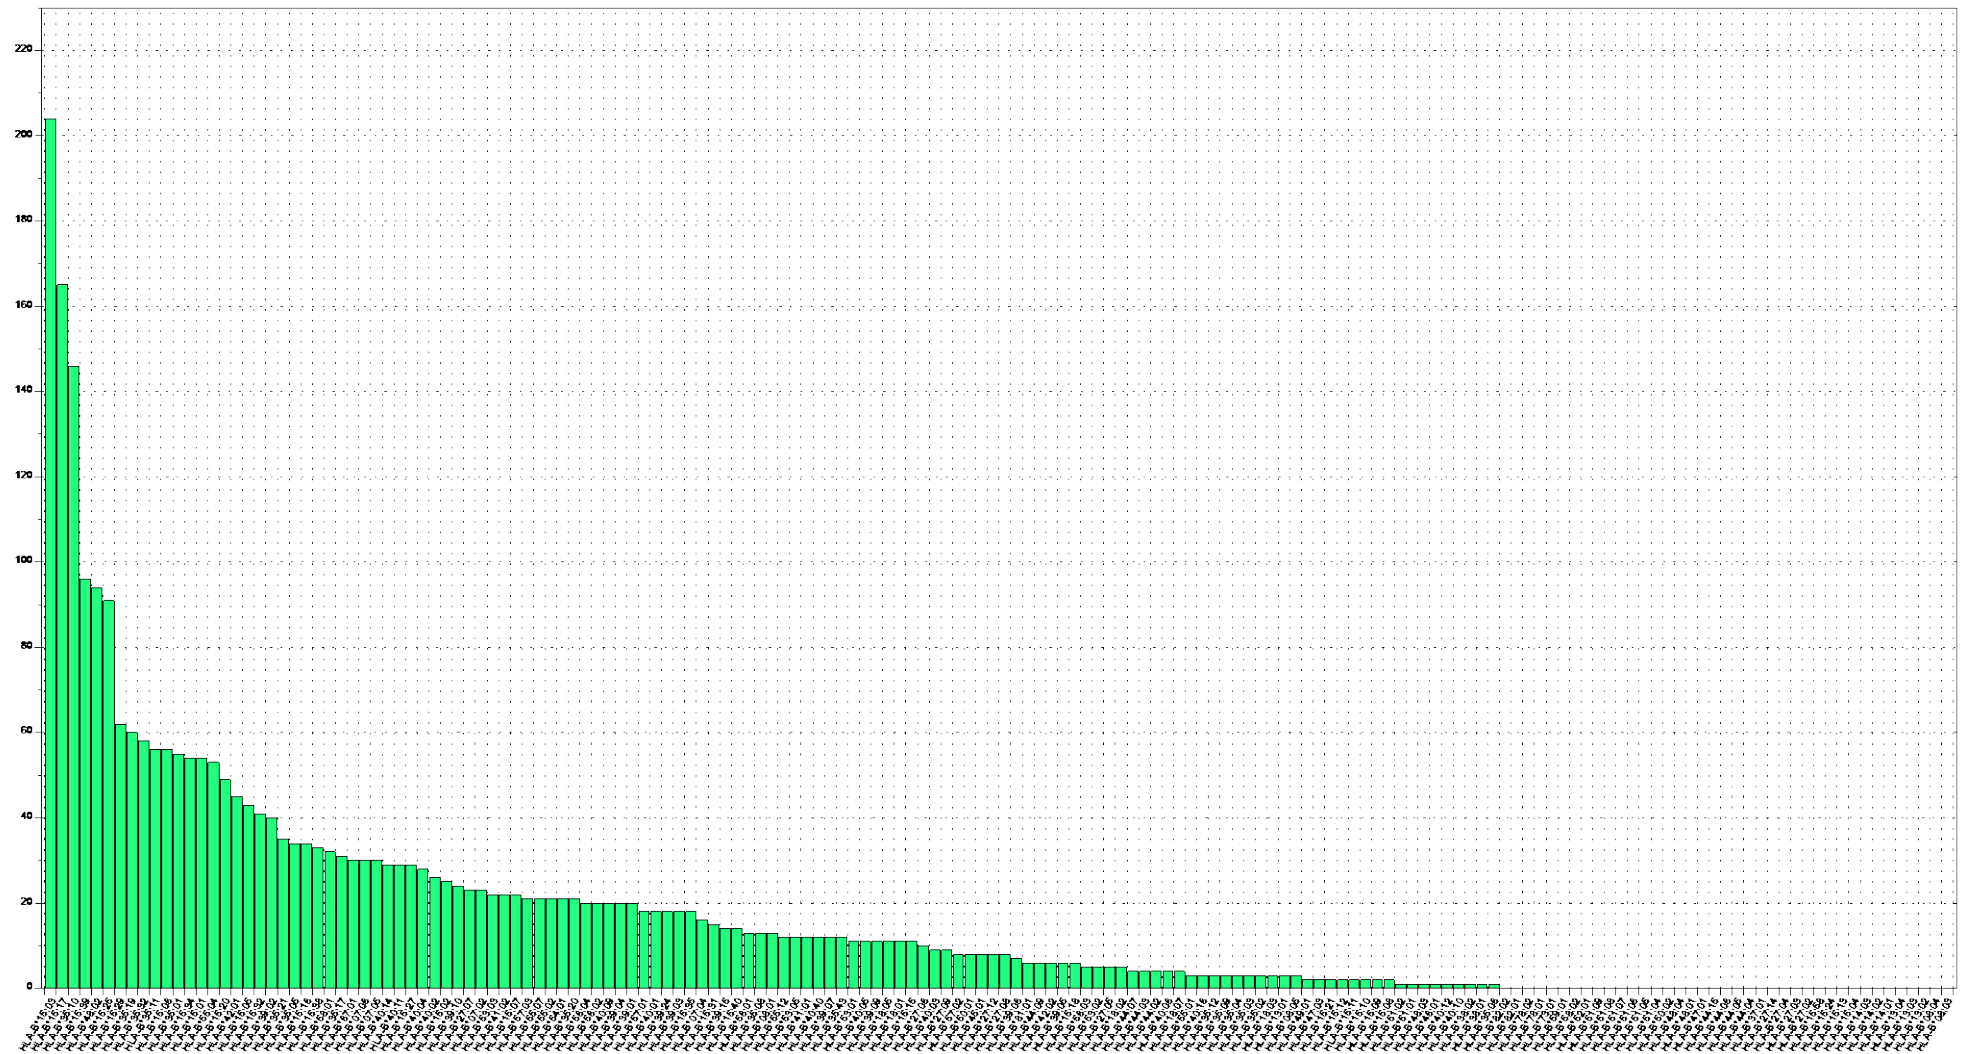

Alleles are ordered on the x-axis by their strong ( $IC_{50} \leq 50$  nM) binding prediction and the number of peptides presented are displayed on the y-axis.

## HLA-B alleles ordered by number of presented peptides with regular binding prediction

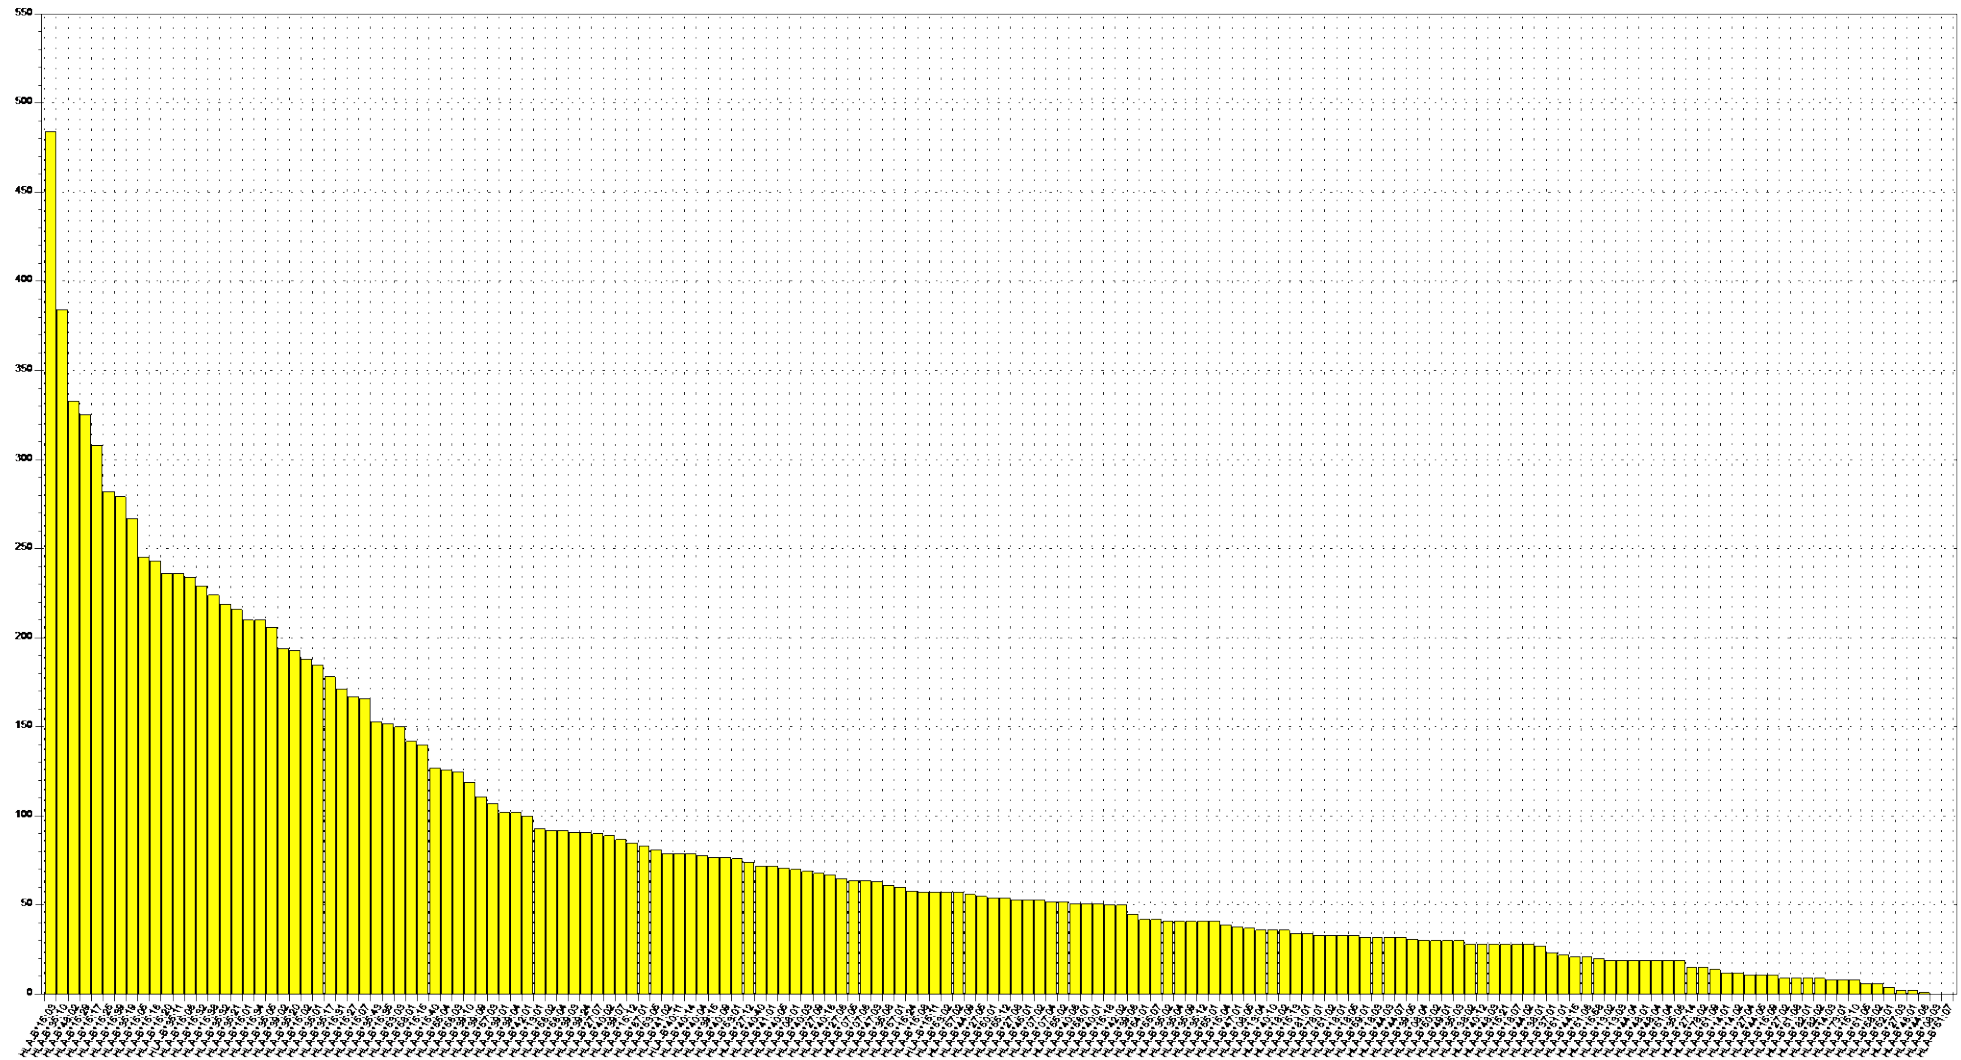

Alleles are ordered on the x-axis by their regular ( $50 \text{ nM} < IC_{50} \leq 500 \text{ nM}$ ) binding prediction and the number of peptides presented are displayed on the y-axis.

## HLA-B alleles ordered by number of presented peptides with weak binding prediction

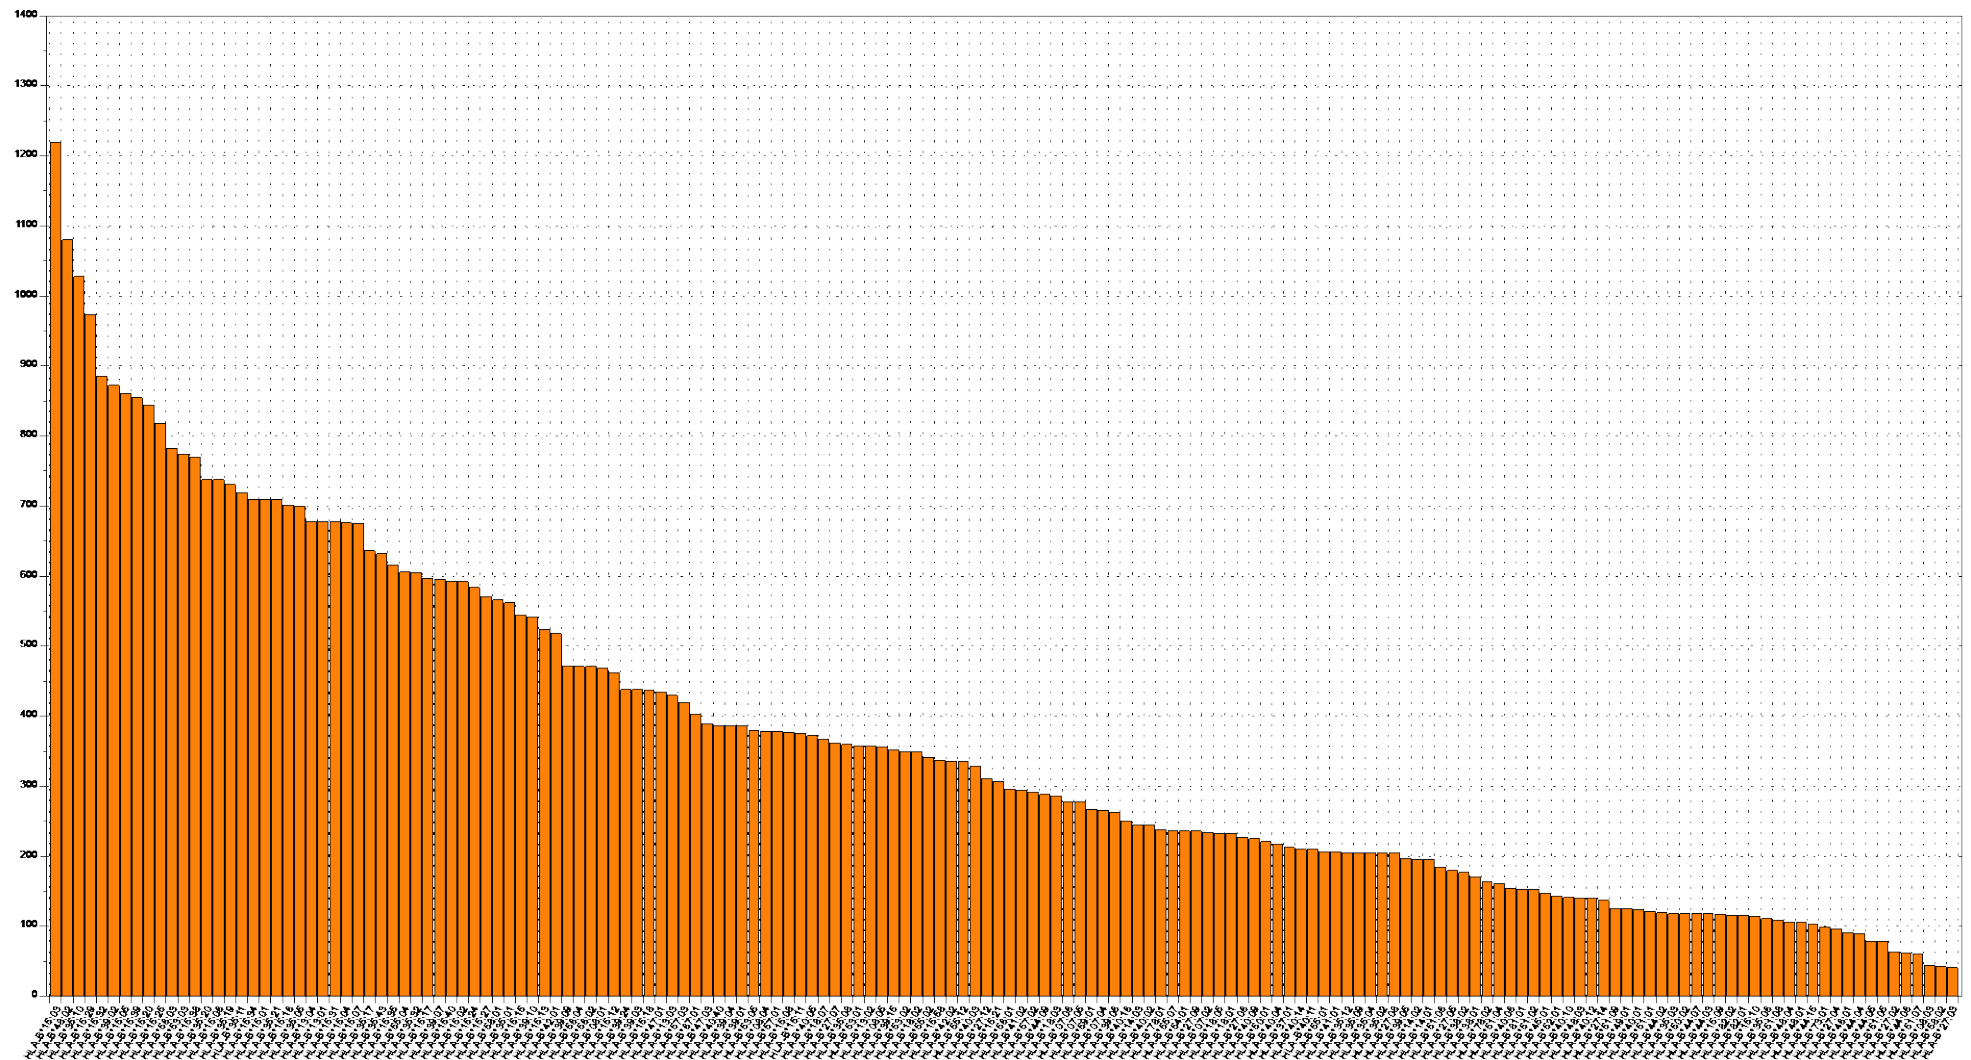

Alleles are ordered on the x-axis by their weak ( $500 \text{ nM} < IC_{50} \leq 5000 \text{ nM}$ ) binding prediction and the number of peptides presented are displayed on the y-axis.

## Total number of peptides with strong, regular and weak binding predictions for *HLA-C*

|             | <b>IC<sub>50</sub> ≤ 50 nM</b><br>Strong binders | <b>50 nM &lt; IC<sub>50</sub> ≤ 500 nM</b><br>Regular binders | <b>500 nM &lt; IC<sub>50</sub> ≤ 5000 nM</b><br>Weak binders | <b>IC<sub>50</sub> &gt; 5000 nM</b><br>Non binders |
|-------------|--------------------------------------------------|---------------------------------------------------------------|--------------------------------------------------------------|----------------------------------------------------|
| HLA-C*01:02 | 0                                                | 6                                                             | 222                                                          | 6842                                               |
| HLA-C*01:03 | 0                                                | 0                                                             | 37                                                           | 7033                                               |
| HLA-C*02:02 | 6                                                | 146                                                           | 900                                                          | 6018                                               |
| HLA-C*02:10 | 6                                                | 146                                                           | 900                                                          | 6018                                               |
| HLA-C*03:02 | 94                                               | 390                                                           | 1068                                                         | 5518                                               |
| HLA-C*03:03 | 65                                               | 237                                                           | 704                                                          | 6064                                               |
| HLA-C*03:04 | 65                                               | 237                                                           | 704                                                          | 6064                                               |
| HLA-C*03:05 | 39                                               | 185                                                           | 696                                                          | 6150                                               |
| HLA-C*03:07 | 53                                               | 221                                                           | 797                                                          | 5999                                               |
| HLA-C*04:01 | 0                                                | 5                                                             | 68                                                           | 6997                                               |
| HLA-C*04:03 | 0                                                | 23                                                            | 127                                                          | 6920                                               |
| HLA-C*04:04 | 0                                                | 1                                                             | 123                                                          | 6946                                               |
| HLA-C*04:05 | 0                                                | 5                                                             | 68                                                           | 6997                                               |
| HLA-C*04:06 | 0                                                | 26                                                            | 235                                                          | 6809                                               |
| HLA-C*04:07 | 0                                                | 5                                                             | 68                                                           | 6997                                               |
| HLA-C*05:01 | 17                                               | 50                                                            | 268                                                          | 6735                                               |
| HLA-C*06:02 | 2                                                | 28                                                            | 356                                                          | 6684                                               |
| HLA-C*06:04 | 3                                                | 69                                                            | 714                                                          | 6284                                               |
| HLA-C*06:06 | 0                                                | 61                                                            | 894                                                          | 6115                                               |
| HLA-C*07:01 | 2                                                | 32                                                            | 415                                                          | 6621                                               |
| HLA-C*07:02 | 8                                                | 92                                                            | 664                                                          | 6306                                               |
| HLA-C*07:03 | 7                                                | 101                                                           | 884                                                          | 6078                                               |
| HLA-C*07:04 | 0                                                | 1                                                             | 113                                                          | 6956                                               |
| HLA-C*07:05 | 5                                                | 61                                                            | 633                                                          | 6371                                               |
| HLA-C*07:06 | 2                                                | 32                                                            | 415                                                          | 6621                                               |
| HLA-C*07:07 | 0                                                | 6                                                             | 228                                                          | 6836                                               |
| HLA-C*07:08 | 0                                                | 26                                                            | 285                                                          | 6759                                               |
| HLA-C*07:10 | 6                                                | 87                                                            | 683                                                          | 6294                                               |
| HLA-C*07:11 | 0                                                | 1                                                             | 113                                                          | 6956                                               |
| HLA-C*07:18 | 2                                                | 32                                                            | 415                                                          | 6621                                               |
| HLA-C*08:01 | 10                                               | 74                                                            | 435                                                          | 6551                                               |
| HLA-C*08:02 | 4                                                | 31                                                            | 146                                                          | 6889                                               |
| HLA-C*08:03 | 10                                               | 74                                                            | 435                                                          | 6551                                               |
| HLA-C*08:04 | 9                                                | 66                                                            | 458                                                          | 6537                                               |
| HLA-C*12:02 | 29                                               | 225                                                           | 1062                                                         | 5754                                               |
| HLA-C*12:03 | 95                                               | 449                                                           | 1260                                                         | 5266                                               |
| HLA-C*12:04 | 33                                               | 304                                                           | 1139                                                         | 5594                                               |
| HLA-C*12:05 | 26                                               | 289                                                           | 1095                                                         | 5660                                               |
| HLA-C*14:02 | 81                                               | 353                                                           | 1262                                                         | 5374                                               |
| HLA-C*14:03 | 81                                               | 353                                                           | 1262                                                         | 5374                                               |
| HLA-C*15:02 | 12                                               | 191                                                           | 653                                                          | 6214                                               |
| HLA-C*15:03 | 10                                               | 181                                                           | 705                                                          | 6174                                               |
| HLA-C*15:04 | 23                                               | 312                                                           | 1055                                                         | 5680                                               |
| HLA-C*15:05 | 6                                                | 117                                                           | 549                                                          | 6398                                               |
| HLA-C*15:06 | 33                                               | 254                                                           | 774                                                          | 6009                                               |
| HLA-C*15:07 | 23                                               | 180                                                           | 715                                                          | 6152                                               |
| HLA-C*15:08 | 10                                               | 92                                                            | 539                                                          | 6429                                               |
| HLA-C*15:13 | 12                                               | 191                                                           | 653                                                          | 6214                                               |
| HLA-C*16:01 | 69                                               | 400                                                           | 1122                                                         | 5479                                               |
| HLA-C*16:02 | 4                                                | 205                                                           | 949                                                          | 5912                                               |
| HLA-C*16:04 | 57                                               | 346                                                           | 1162                                                         | 5505                                               |
| HLA-C*17:01 | 8                                                | 126                                                           | 826                                                          | 6110                                               |
| HLA-C*17:03 | 4                                                | 63                                                            | 413                                                          | 6590                                               |
| HLA-C*18:01 | 0                                                | 0                                                             | 29                                                           | 7041                                               |
| HLA-C*18:02 | 0                                                | 0                                                             | 29                                                           | 7041                                               |

Alleles are ordered alphabetically.

## General binding prediction tendencies for HLA-C

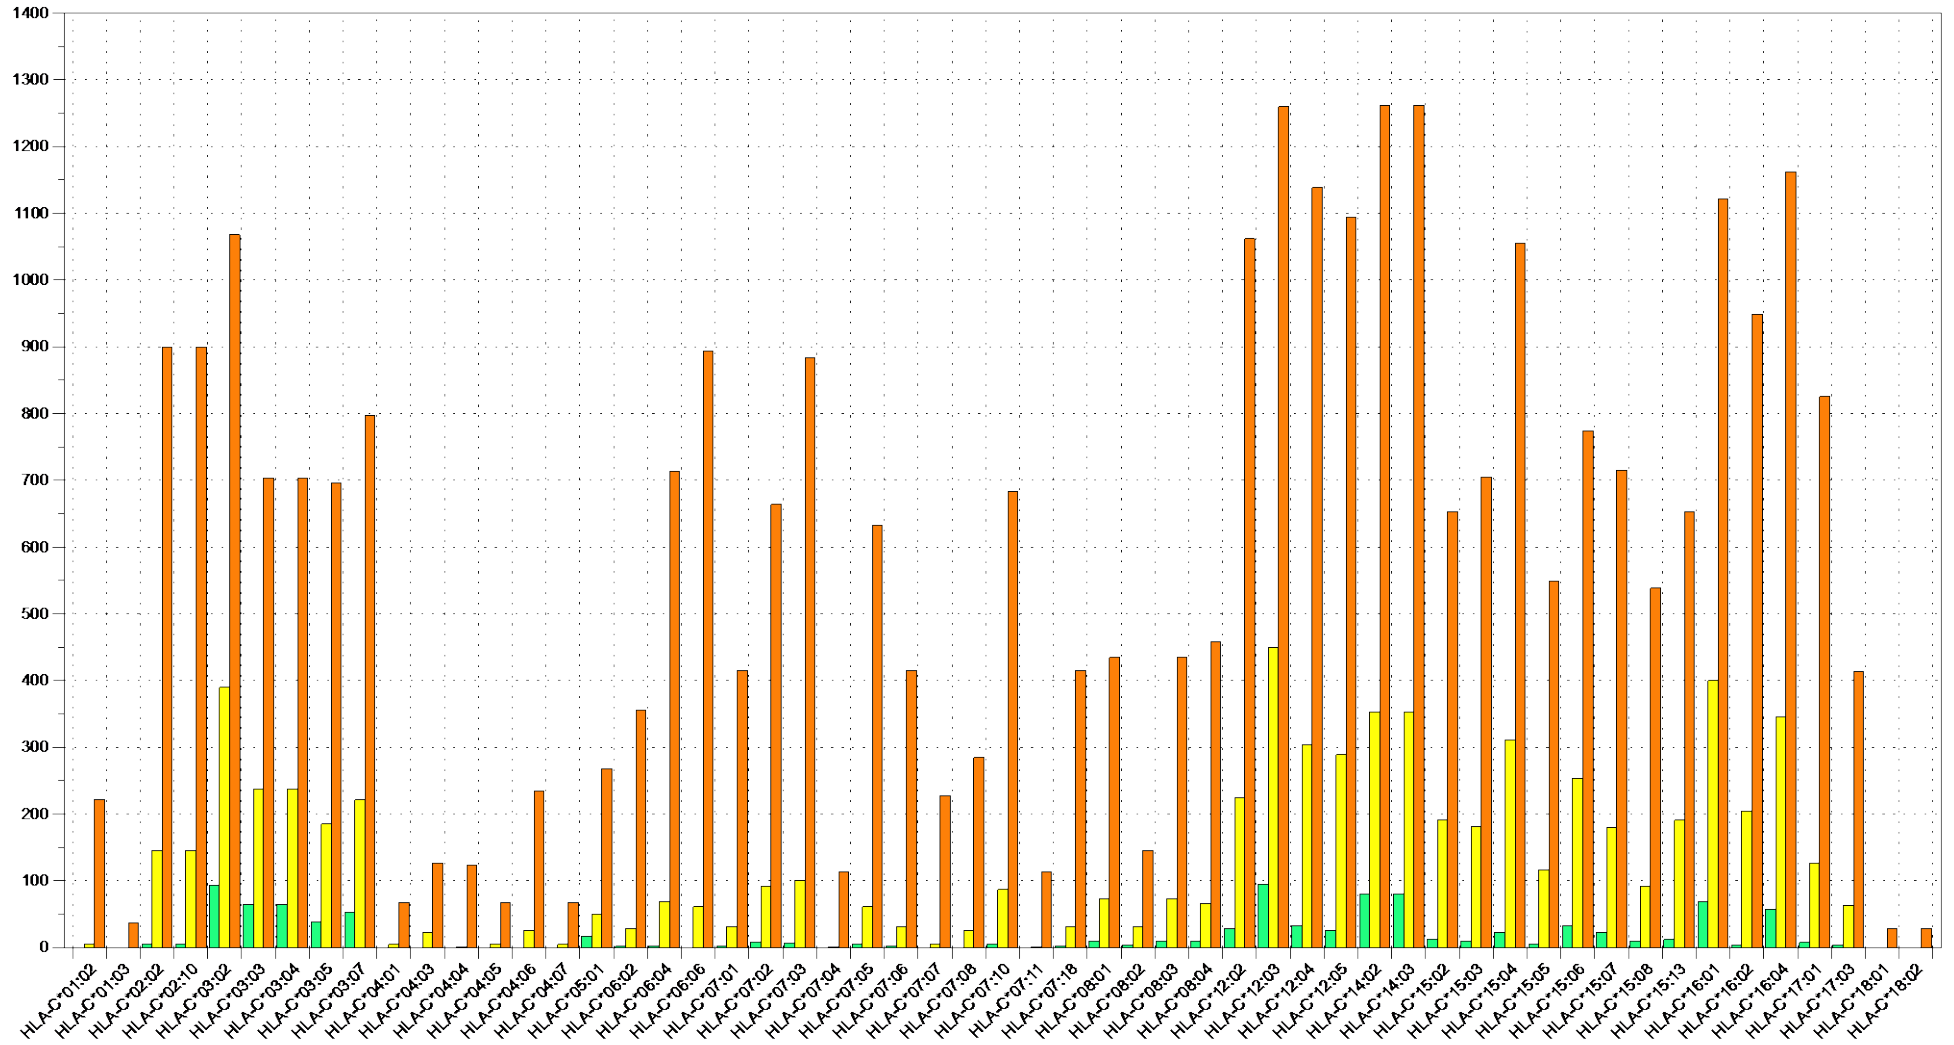

Alleles are ordered alphabetically on the x-axis, while the number of peptides binding with strong ( $IC_{50} \leq 50$  nM), regular ( $50 \text{ nM} < IC_{50} \leq 500$  nM) and weak ( $500 \text{ nM} < IC_{50} \leq 5000$  nM) binding prediction are displayed on the y-axis.



## HLA-C alleles ordered by number of presented peptides with strong binding prediction

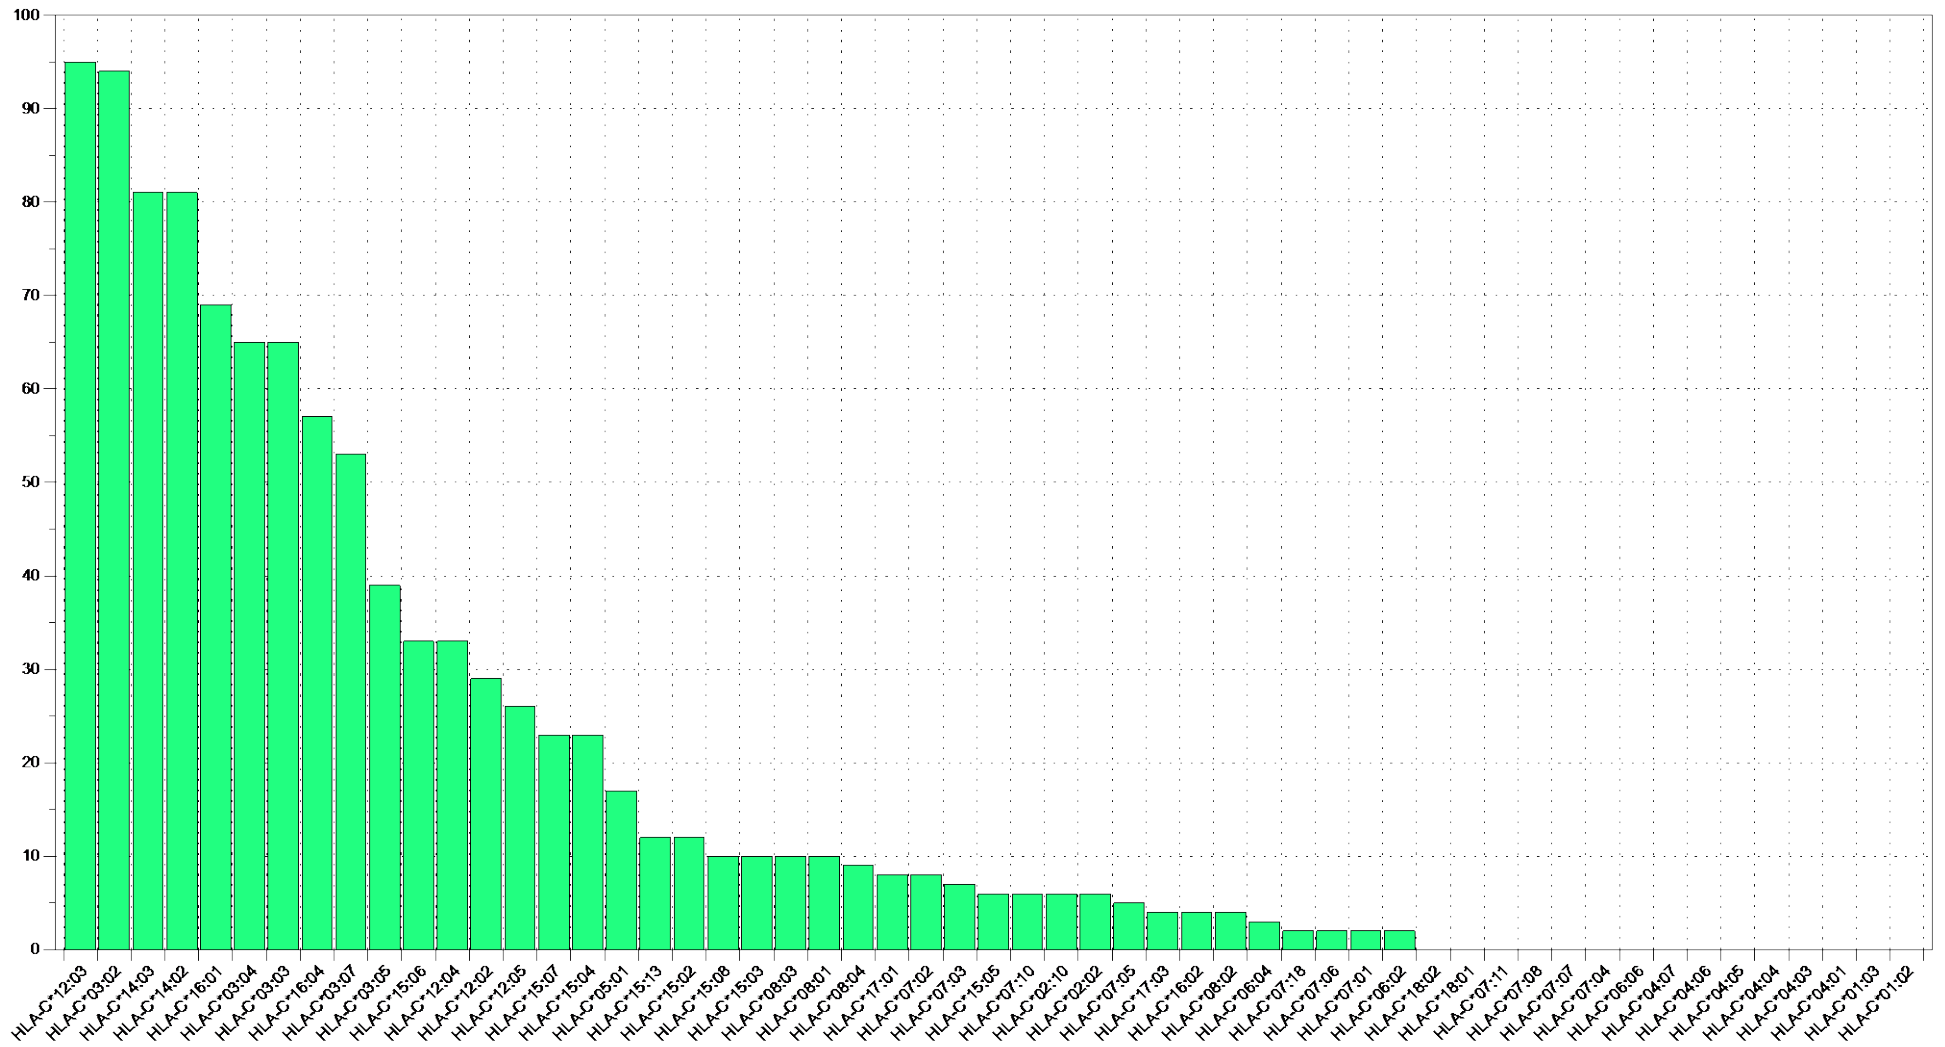

Alleles are ordered on the x-axis by their strong (IC<sub>50</sub> ≤ 50 nM) binding prediction and the number of peptides presented are displayed on the y-axis.

## HLA-C alleles ordered by number of presented peptides with regular binding prediction

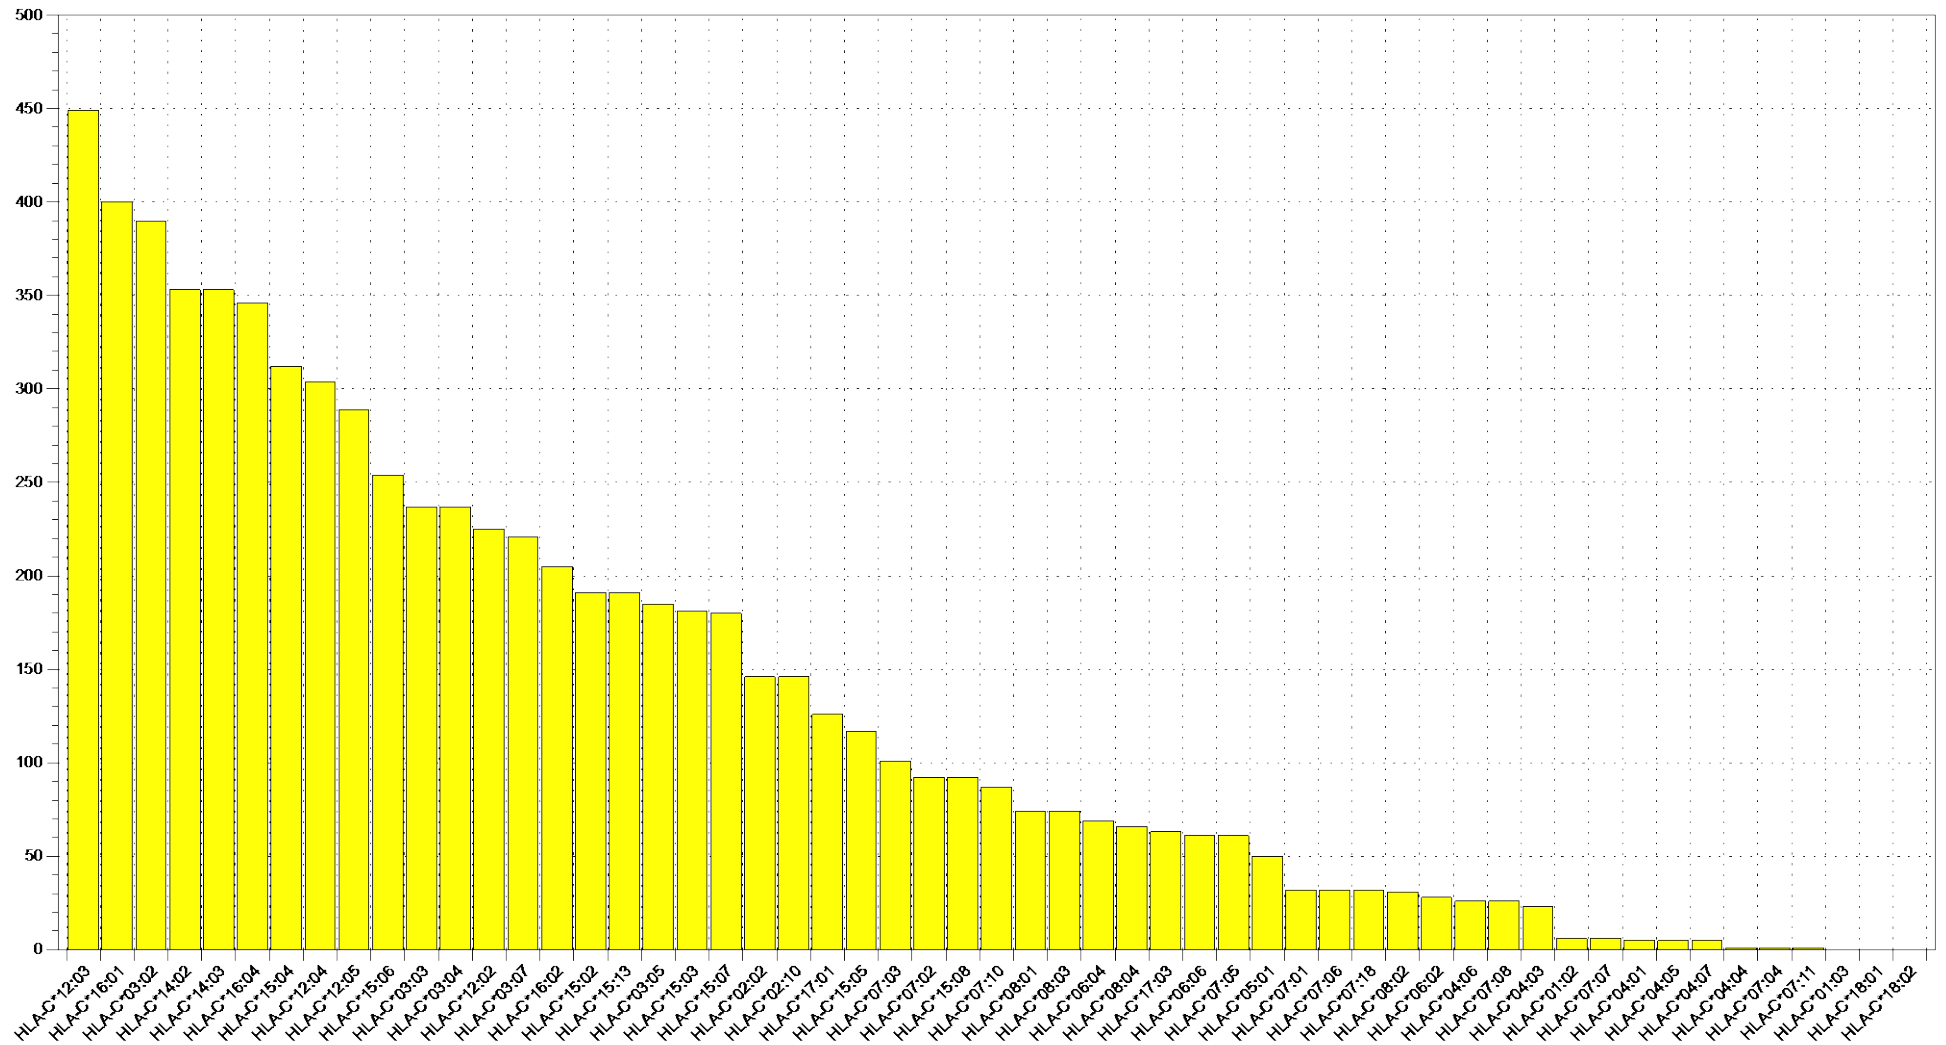

Alleles are ordered on the x-axis by their regular ( $50 \text{ nM} < \text{IC}_{50} \leq 500 \text{ nM}$ ) binding prediction and the number of peptides presented are displayed on the y-axis.

## HLA-C alleles ordered by number of presented peptides with weak binding prediction

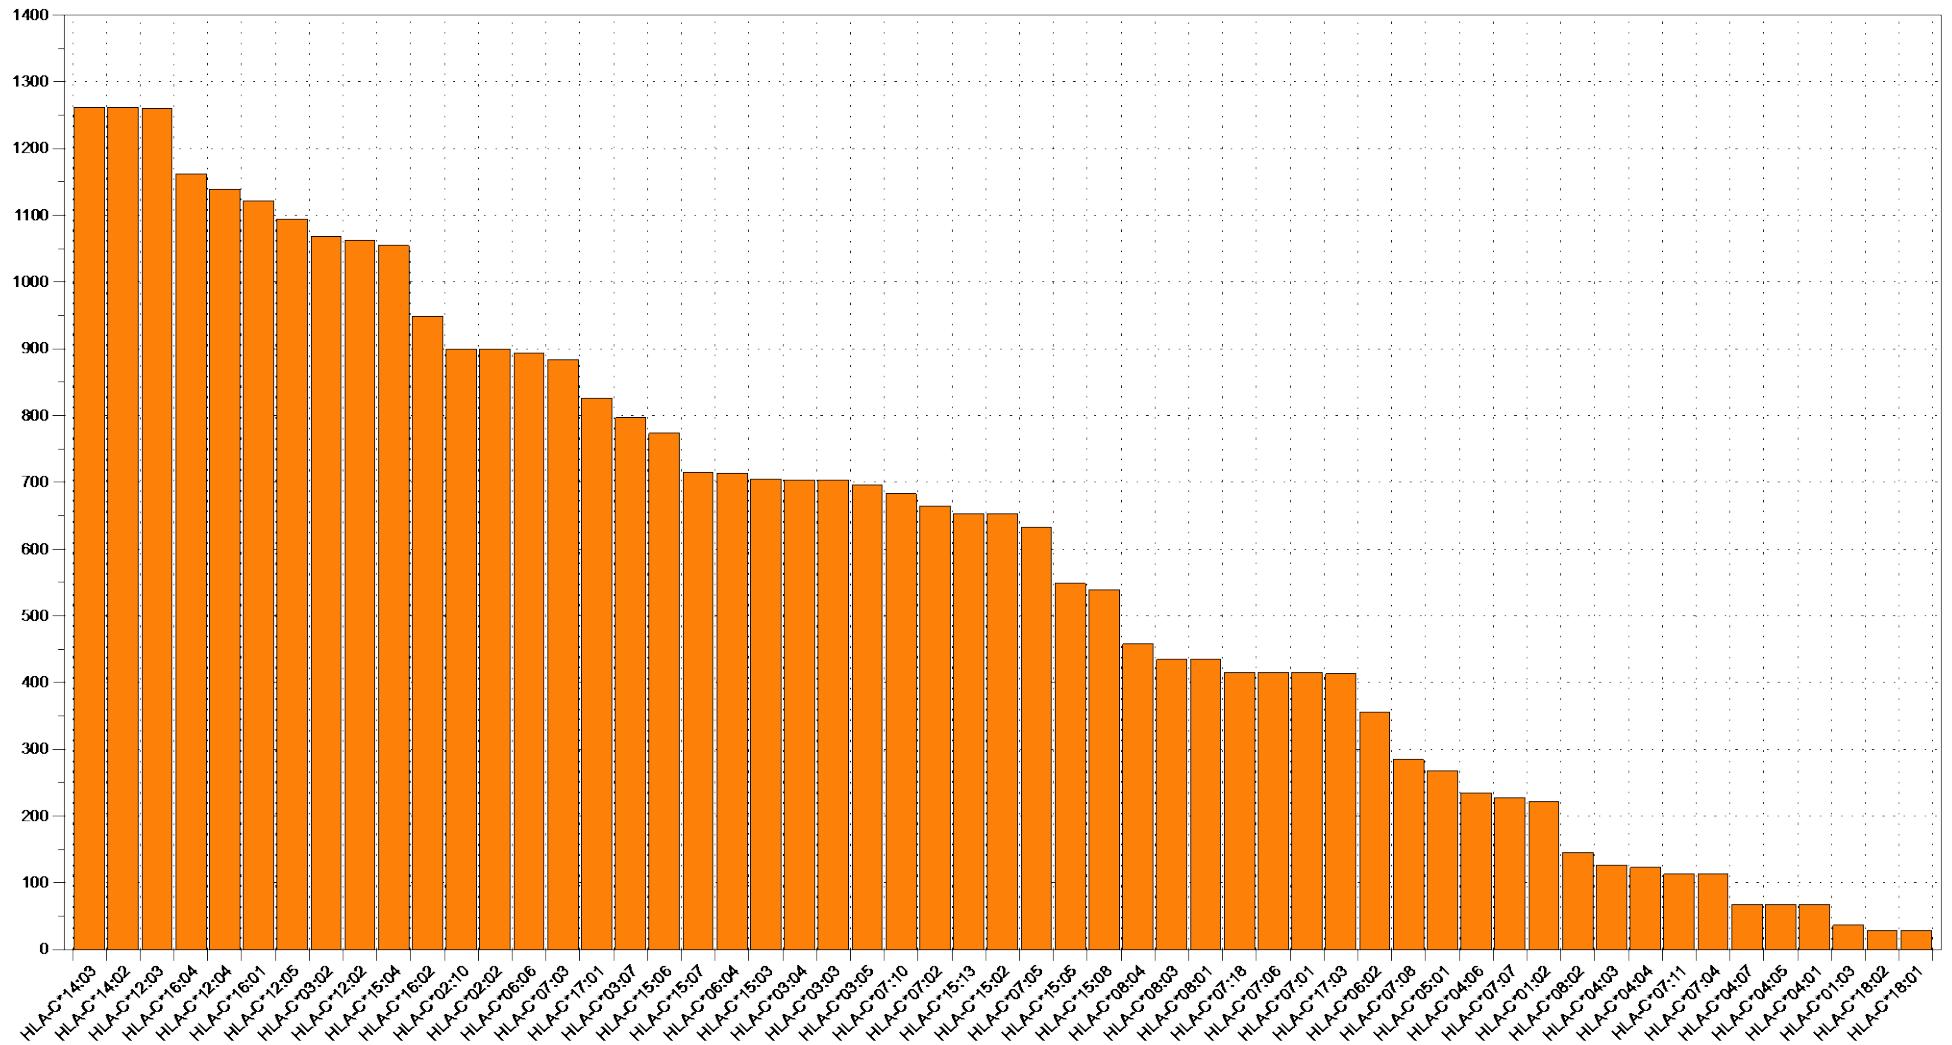

Alleles are ordered on the x-axis by their weak (500 nM < IC<sub>50</sub> ≤ 5000 nM) binding prediction and the number of peptides presented are displayed on the y-axis.

## Total number of peptides with strong, regular and weak binding predictions for HLA-DRB1

|                | IC <sub>50</sub> ≤ 50 nM<br>Strong binders | 50 nM < IC <sub>50</sub> ≤ 1000 nM<br>Regular binders | 1000 nM < IC <sub>50</sub> ≤ 5000 nM<br>Weak binders | IC <sub>50</sub> > 5000 nM<br>Non binders |
|----------------|--------------------------------------------|-------------------------------------------------------|------------------------------------------------------|-------------------------------------------|
| HLA-DRB1*01:01 | 756                                        | 4014                                                  | 1716                                                 | 580                                       |
| HLA-DRB1*01:02 | 6                                          | 1923                                                  | 3216                                                 | 1921                                      |
| HLA-DRB1*01:03 | 1                                          | 507                                                   | 2542                                                 | 4016                                      |
| HLA-DRB1*01:04 | 164                                        | 3732                                                  | 2339                                                 | 831                                       |
| HLA-DRB1*03:01 | 4                                          | 836                                                   | 2761                                                 | 3465                                      |
| HLA-DRB1*03:02 | 0                                          | 12                                                    | 197                                                  | 6857                                      |
| HLA-DRB1*03:03 | 0                                          | 49                                                    | 791                                                  | 6226                                      |
| HLA-DRB1*03:04 | 4                                          | 836                                                   | 2761                                                 | 3465                                      |
| HLA-DRB1*03:05 | 1                                          | 373                                                   | 2066                                                 | 4626                                      |
| HLA-DRB1*03:06 | 0                                          | 528                                                   | 2677                                                 | 3861                                      |
| HLA-DRB1*03:07 | 0                                          | 398                                                   | 2040                                                 | 4628                                      |
| HLA-DRB1*03:08 | 4                                          | 836                                                   | 2761                                                 | 3465                                      |
| HLA-DRB1*04:01 | 26                                         | 2380                                                  | 3350                                                 | 1310                                      |
| HLA-DRB1*04:02 | 0                                          | 1091                                                  | 3186                                                 | 2789                                      |
| HLA-DRB1*04:03 | 0                                          | 919                                                   | 3210                                                 | 2937                                      |
| HLA-DRB1*04:04 | 22                                         | 2504                                                  | 2941                                                 | 1599                                      |
| HLA-DRB1*04:05 | 16                                         | 2282                                                  | 3146                                                 | 1622                                      |
| HLA-DRB1*04:06 | 0                                          | 919                                                   | 3210                                                 | 2937                                      |
| HLA-DRB1*04:07 | 0                                          | 542                                                   | 2860                                                 | 3664                                      |
| HLA-DRB1*04:08 | 19                                         | 1983                                                  | 3319                                                 | 1745                                      |
| HLA-DRB1*04:10 | 4                                          | 2290                                                  | 3037                                                 | 1735                                      |
| HLA-DRB1*04:11 | 0                                          | 975                                                   | 3413                                                 | 2678                                      |
| HLA-DRB1*04:13 | 19                                         | 2983                                                  | 2972                                                 | 1092                                      |
| HLA-DRB1*04:15 | 0                                          | 296                                                   | 1871                                                 | 4899                                      |
| HLA-DRB1*04:17 | 0                                          | 710                                                   | 3182                                                 | 3174                                      |
| HLA-DRB1*07:01 | 135                                        | 2955                                                  | 2590                                                 | 1386                                      |
| HLA-DRB1*08:01 | 0                                          | 1246                                                  | 3225                                                 | 2595                                      |
| HLA-DRB1*08:02 | 0                                          | 998                                                   | 3331                                                 | 2737                                      |
| HLA-DRB1*08:03 | 0                                          | 319                                                   | 3029                                                 | 3718                                      |
| HLA-DRB1*08:04 | 0                                          | 1033                                                  | 3067                                                 | 2966                                      |
| HLA-DRB1*08:05 | 6                                          | 1306                                                  | 2926                                                 | 2828                                      |
| HLA-DRB1*08:06 | 3                                          | 866                                                   | 2988                                                 | 3209                                      |
| HLA-DRB1*08:07 | 0                                          | 2240                                                  | 3303                                                 | 1523                                      |
| HLA-DRB1*08:09 | 0                                          | 998                                                   | 3331                                                 | 2737                                      |
| HLA-DRB1*08:10 | 0                                          | 857                                                   | 3283                                                 | 2926                                      |
| HLA-DRB1*08:11 | 0                                          | 2166                                                  | 3279                                                 | 1621                                      |
| HLA-DRB1*08:12 | 0                                          | 213                                                   | 2773                                                 | 4080                                      |
| HLA-DRB1*09:01 | 42                                         | 3023                                                  | 2843                                                 | 1158                                      |
| HLA-DRB1*10:01 | 320                                        | 3999                                                  | 2078                                                 | 669                                       |
| HLA-DRB1*11:01 | 63                                         | 1656                                                  | 2633                                                 | 2714                                      |
| HLA-DRB1*11:02 | 162                                        | 2876                                                  | 2580                                                 | 1448                                      |
| HLA-DRB1*11:03 | 61                                         | 1804                                                  | 3146                                                 | 2055                                      |
| HLA-DRB1*11:04 | 20                                         | 1228                                                  | 2868                                                 | 2950                                      |
| HLA-DRB1*11:05 | 10                                         | 1755                                                  | 3013                                                 | 2288                                      |
| HLA-DRB1*11:06 | 4                                          | 619                                                   | 2338                                                 | 4105                                      |
| HLA-DRB1*11:08 | 11                                         | 2791                                                  | 2987                                                 | 1277                                      |
| HLA-DRB1*11:09 | 63                                         | 1656                                                  | 2633                                                 | 2714                                      |
| HLA-DRB1*11:10 | 63                                         | 1656                                                  | 2633                                                 | 2714                                      |
| HLA-DRB1*11:11 | 47                                         | 2073                                                  | 2876                                                 | 2070                                      |
| HLA-DRB1*11:12 | 63                                         | 1656                                                  | 2633                                                 | 2714                                      |
| HLA-DRB1*11:14 | 91                                         | 2184                                                  | 2966                                                 | 1825                                      |
| HLA-DRB1*11:15 | 63                                         | 1656                                                  | 2633                                                 | 2714                                      |
| HLA-DRB1*11:19 | 0                                          | 1465                                                  | 3262                                                 | 2339                                      |
| HLA-DRB1*11:28 | 63                                         | 1656                                                  | 2633                                                 | 2714                                      |
| HLA-DRB1*12:01 | 0                                          | 811                                                   | 2818                                                 | 3437                                      |
| HLA-DRB1*12:02 | 0                                          | 313                                                   | 2084                                                 | 4669                                      |
| HLA-DRB1*12:03 | 0                                          | 1527                                                  | 3061                                                 | 2478                                      |
| HLA-DRB1*13:01 | 162                                        | 2876                                                  | 2580                                                 | 1448                                      |
| HLA-DRB1*13:02 | 91                                         | 2184                                                  | 2966                                                 | 1825                                      |
| HLA-DRB1*13:03 | 0                                          | 1194                                                  | 3682                                                 | 2190                                      |
| HLA-DRB1*13:04 | 88                                         | 2522                                                  | 2886                                                 | 1570                                      |
| HLA-DRB1*13:05 | 63                                         | 1656                                                  | 2633                                                 | 2714                                      |

|                | <b>IC<sub>50</sub> ≤ 50 nM</b><br><b>Strong binders</b> | <b>50 nM &lt; IC<sub>50</sub> ≤ 1000 nM</b><br><b>Regular binders</b> | <b>1000 nM &lt; IC<sub>50</sub> ≤ 5000 nM</b><br><b>Weak binders</b> | <b>IC<sub>50</sub> &gt; 5000 nM</b><br><b>Non binders</b> |
|----------------|---------------------------------------------------------|-----------------------------------------------------------------------|----------------------------------------------------------------------|-----------------------------------------------------------|
| HLA-DRB1*13:06 | 23                                                      | 1929                                                                  | 2932                                                                 | 2182                                                      |
| HLA-DRB1*13:07 | 23                                                      | 1288                                                                  | 2711                                                                 | 3044                                                      |
| HLA-DRB1*13:08 | 73                                                      | 2612                                                                  | 2819                                                                 | 1562                                                      |
| HLA-DRB1*13:10 | 0                                                       | 698                                                                   | 3266                                                                 | 3102                                                      |
| HLA-DRB1*13:11 | 20                                                      | 1228                                                                  | 2868                                                                 | 2950                                                      |
| HLA-DRB1*13:12 | 0                                                       | 1301                                                                  | 3529                                                                 | 2236                                                      |
| HLA-DRB1*13:22 | 162                                                     | 2876                                                                  | 2580                                                                 | 1448                                                      |
| HLA-DRB1*14:01 | 0                                                       | 2736                                                                  | 3390                                                                 | 940                                                       |
| HLA-DRB1*14:02 | 0                                                       | 1469                                                                  | 3738                                                                 | 1859                                                      |
| HLA-DRB1*14:03 | 0                                                       | 521                                                                   | 3087                                                                 | 3458                                                      |
| HLA-DRB1*14:04 | 0                                                       | 2165                                                                  | 3872                                                                 | 1029                                                      |
| HLA-DRB1*14:05 | 0                                                       | 1379                                                                  | 3790                                                                 | 1897                                                      |
| HLA-DRB1*14:06 | 0                                                       | 2427                                                                  | 3302                                                                 | 1337                                                      |
| HLA-DRB1*14:07 | 0                                                       | 1359                                                                  | 4158                                                                 | 1549                                                      |
| HLA-DRB1*14:08 | 0                                                       | 1379                                                                  | 3790                                                                 | 1897                                                      |
| HLA-DRB1*14:09 | 11                                                      | 2700                                                                  | 3409                                                                 | 946                                                       |
| HLA-DRB1*14:10 | 0                                                       | 1333                                                                  | 3473                                                                 | 2260                                                      |
| HLA-DRB1*14:12 | 0                                                       | 1069                                                                  | 3349                                                                 | 2648                                                      |
| HLA-DRB1*14:13 | 0                                                       | 1464                                                                  | 3883                                                                 | 1719                                                      |
| HLA-DRB1*14:14 | 0                                                       | 650                                                                   | 3567                                                                 | 2849                                                      |
| HLA-DRB1*14:18 | 0                                                       | 621                                                                   | 3488                                                                 | 2957                                                      |
| HLA-DRB1*14:54 | 0                                                       | 2736                                                                  | 3390                                                                 | 940                                                       |
| HLA-DRB1*15:01 | 12                                                      | 2097                                                                  | 2777                                                                 | 2180                                                      |
| HLA-DRB1*15:02 | 0                                                       | 1453                                                                  | 3134                                                                 | 2479                                                      |
| HLA-DRB1*15:03 | 0                                                       | 782                                                                   | 2696                                                                 | 3588                                                      |
| HLA-DRB1*15:04 | 16                                                      | 1229                                                                  | 2998                                                                 | 2823                                                      |
| HLA-DRB1*15:06 | 12                                                      | 2097                                                                  | 2777                                                                 | 2180                                                      |
| HLA-DRB1*15:11 | 1                                                       | 1240                                                                  | 3148                                                                 | 2677                                                      |
| HLA-DRB1*16:01 | 4                                                       | 1151                                                                  | 2907                                                                 | 3004                                                      |
| HLA-DRB1*16:02 | 27                                                      | 2472                                                                  | 3070                                                                 | 1497                                                      |
| HLA-DRB1*16:03 | 4                                                       | 1151                                                                  | 2907                                                                 | 3004                                                      |
| HLA-DRB1*16:05 | 7                                                       | 1332                                                                  | 3169                                                                 | 2558                                                      |

Alleles are ordered alphabetically.

## General binding prediction tendencies for *HLA-DRB1*

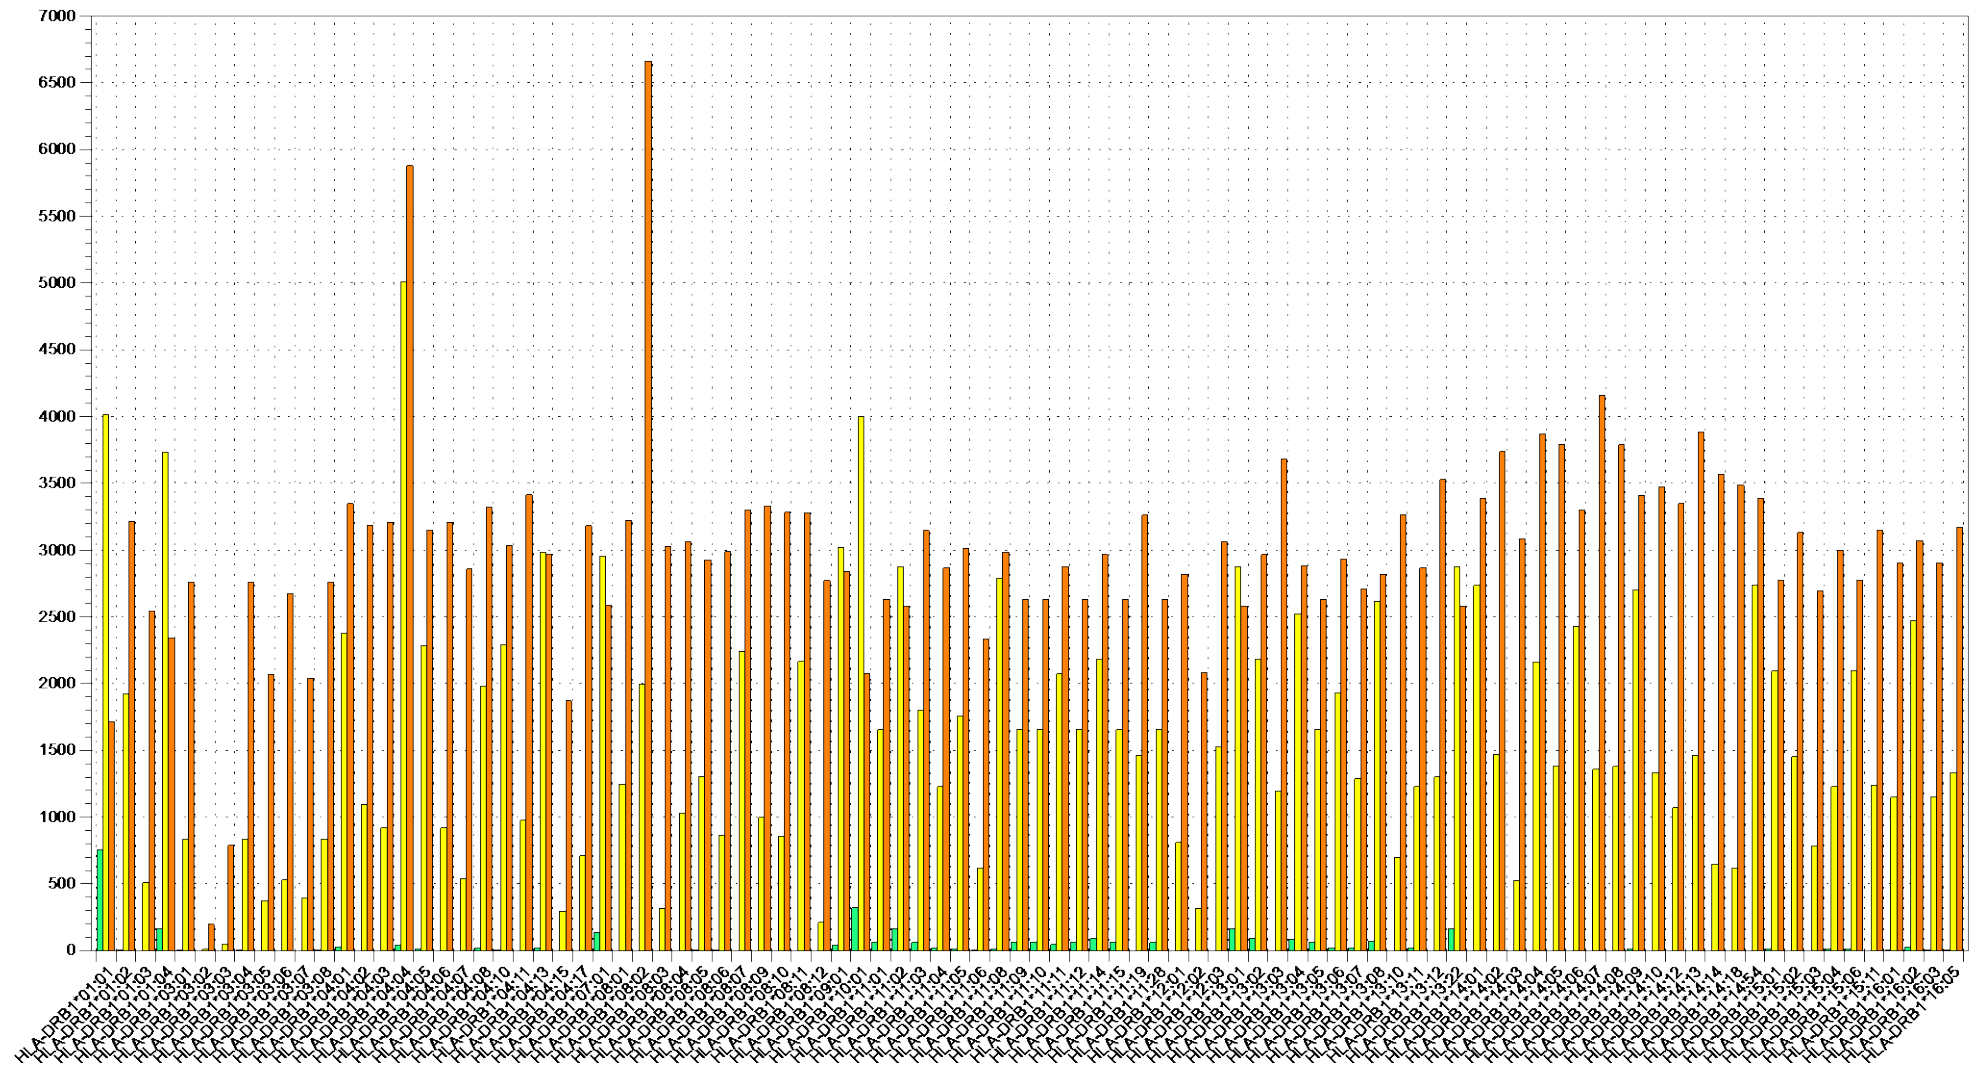

Alleles are ordered alphabetically on the x-axis, while the number of peptides binding with strong ( $IC_{50} \leq 50$  nM), regular ( $50$  nM  $< IC_{50} \leq 1000$  nM) and weak ( $1000$  nM  $< IC_{50} \leq 5000$  nM) binding prediction are displayed on the y-axis.



## HLA-DRB1 alleles ordered by number of presented peptides with regular binding prediction

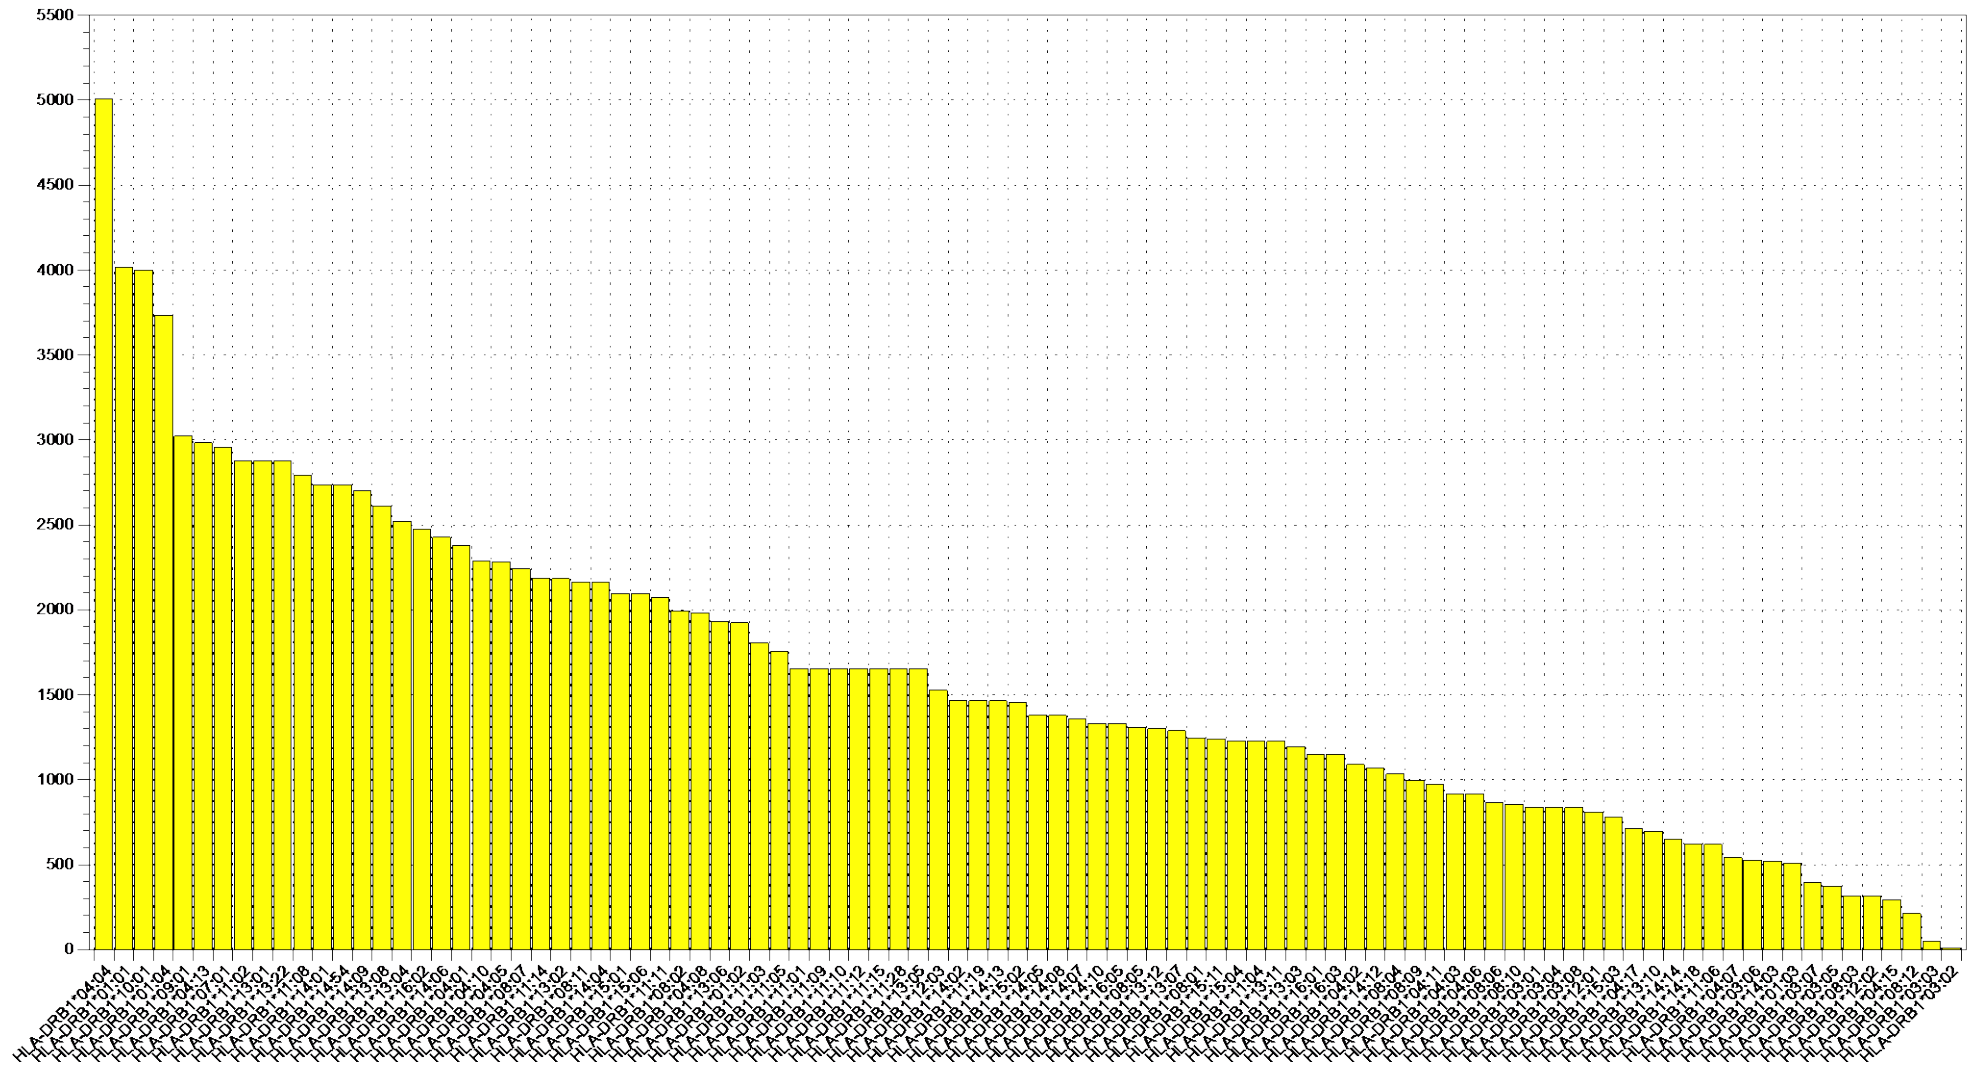

Alleles are ordered on the x-axis by their regular ( $50 \text{ nM} < IC_{50} \leq 1000 \text{ nM}$ ) binding prediction and the number of peptides presented are displayed on the y-axis.



## HLA-DRB1 alleles ordered by number of presented peptides with weak binding prediction

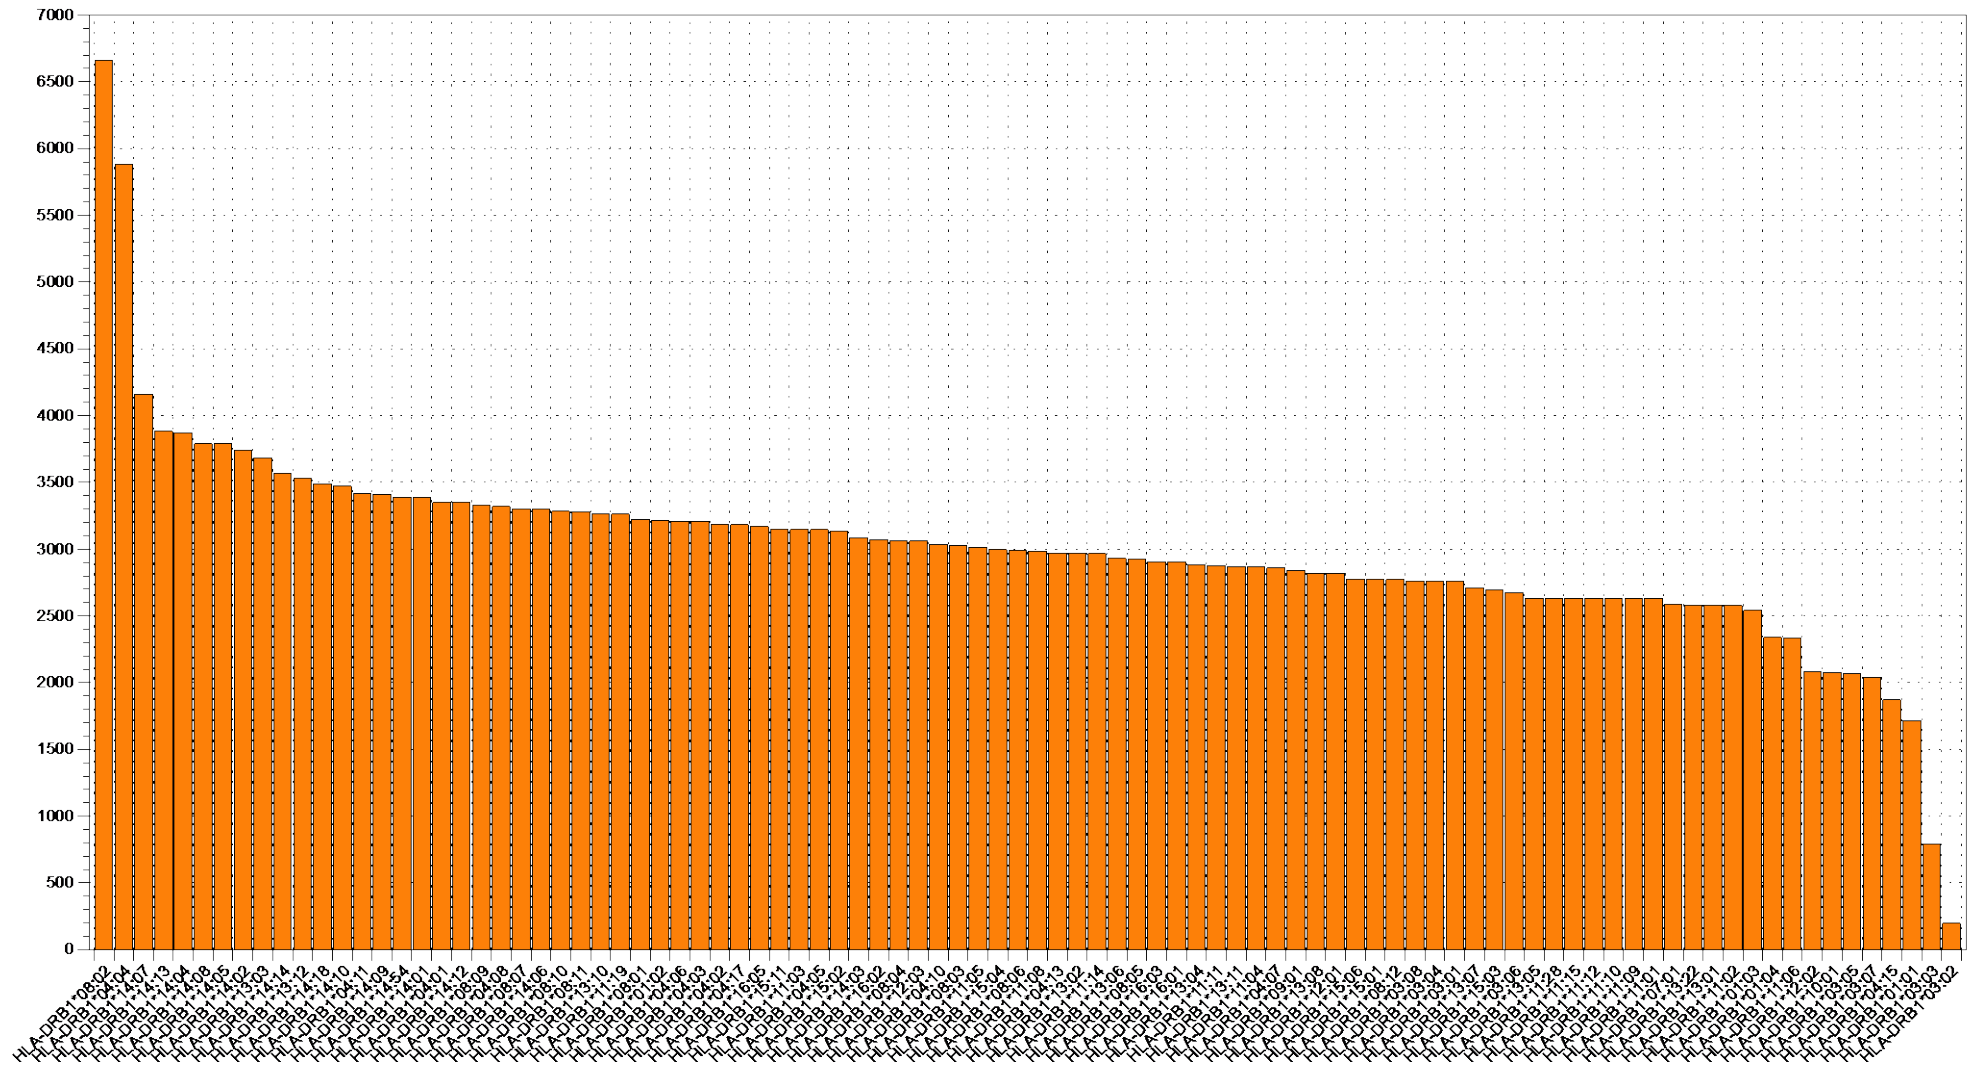

Alleles are ordered on the x-axis by their weak ( $1000 \text{ nM} < \text{IC}_{50} \leq 5000 \text{ nM}$ ) binding prediction and the number of peptides presented are displayed on the y-axis.

**Total number of peptides with strong, regular and weak binding predictions for *HLA-DQA1/-DQB1***

|                           | <b>IC<sub>50</sub> ≤ 50 nM<br/>Strong binders</b> | <b>50 nM &lt; IC<sub>50</sub> ≤ 1000 nM<br/>Regular binders</b> | <b>1000 nM &lt; IC<sub>50</sub> ≤ 5000 nM<br/>Weak binders</b> | <b>IC<sub>50</sub> &gt; 5000 nM<br/>Non binders</b> |
|---------------------------|---------------------------------------------------|-----------------------------------------------------------------|----------------------------------------------------------------|-----------------------------------------------------|
| HLA-DQA1*05:01/DQB1*02:01 | 0                                                 | 902                                                             | 3458                                                           | 2706                                                |
| HLA-DQA1*02:01/DQB1*02:01 | 0                                                 | 122                                                             | 2148                                                           | 4796                                                |
| HLA-DQA1*02:01/DQB1*02:02 | 0                                                 | 122                                                             | 2148                                                           | 4796                                                |
| HLA-DQA1*05:01/DQB1*02:03 | 0                                                 | 783                                                             | 4243                                                           | 2040                                                |
| HLA-DQA1*05:01/DQB1*03:01 | 10                                                | 1350                                                            | 3328                                                           | 2378                                                |
| HLA-DQA1*03:01/DQB1*03:02 | 0                                                 | 121                                                             | 3105                                                           | 3840                                                |
| HLA-DQA1*02:01/DQB1*03:03 | 0                                                 | 1607                                                            | 3360                                                           | 2099                                                |
| HLA-DQA1*03:01/DQB1*03:03 | 0                                                 | 245                                                             | 3475                                                           | 3346                                                |
| HLA-DQA1*03:02/DQB1*03:03 | 0                                                 | 245                                                             | 3475                                                           | 3346                                                |
| HLA-DQA1*03:01/DQB1*03:04 | 0                                                 | 595                                                             | 4293                                                           | 2178                                                |
| HLA-DQA1*03:01/DQB1*03:05 | 0                                                 | 176                                                             | 4542                                                           | 2348                                                |
| HLA-DQA1*05:01/DQB1*03:05 | 0                                                 | 1743                                                            | 4517                                                           | 806                                                 |
| HLA-DQA1*03:01/DQB1*03:07 | 0                                                 | 121                                                             | 3105                                                           | 3840                                                |
| HLA-DQA1*01:03/DQB1*03:19 | 1                                                 | 1701                                                            | 3622                                                           | 1742                                                |
| HLA-DQA1*01:05/DQB1*03:19 | 0                                                 | 198                                                             | 3352                                                           | 3516                                                |
| HLA-DQA1*05:05/DQB1*03:19 | 10                                                | 1350                                                            | 3328                                                           | 2378                                                |
| HLA-DQA1*03:01/DQB1*04:01 | 0                                                 | 64                                                              | 2385                                                           | 4617                                                |
| HLA-DQA1*03:03/DQB1*04:01 | 0                                                 | 64                                                              | 2385                                                           | 4617                                                |
| HLA-DQA1*04:01/DQB1*04:01 | 0                                                 | 156                                                             | 3312                                                           | 3598                                                |
| HLA-DQA1*04:01/DQB1*04:02 | 0                                                 | 156                                                             | 3312                                                           | 3598                                                |
| HLA-DQA1*01:01/DQB1*05:01 | 0                                                 | 253                                                             | 1898                                                           | 4915                                                |
| HLA-DQA1*01:02/DQB1*05:02 | 0                                                 | 150                                                             | 2122                                                           | 4794                                                |
| HLA-DQA1*01:01/DQB1*05:03 | 0                                                 | 25                                                              | 1402                                                           | 5639                                                |
| HLA-DQA1*01:03/DQB1*06:01 | 0                                                 | 622                                                             | 3782                                                           | 2662                                                |
| HLA-DQA1*01:02/DQB1*06:02 | 0                                                 | 672                                                             | 3711                                                           | 2683                                                |
| HLA-DQA1*01:03/DQB1*06:02 | 0                                                 | 952                                                             | 3638                                                           | 2476                                                |
| HLA-DQA1*01:02/DQB1*06:03 | 0                                                 | 4                                                               | 1115                                                           | 5947                                                |
| HLA-DQA1*01:03/DQB1*06:03 | 0                                                 | 9                                                               | 1227                                                           | 5830                                                |
| HLA-DQA1*01:02/DQB1*06:08 | 0                                                 | 13                                                              | 2008                                                           | 5045                                                |
| HLA-DQA1*01:02/DQB1*06:09 | 0                                                 | 0                                                               | 16                                                             | 7050                                                |
| HLA-DQA1*01:02/DQB1*06:10 | 0                                                 | 14                                                              | 2768                                                           | 4284                                                |
| HLA-DQA1*01:02/DQB1*06:11 | 0                                                 | 327                                                             | 3339                                                           | 3400                                                |
| HLA-DQA1*01:03/DQB1*06:11 | 0                                                 | 703                                                             | 3381                                                           | 2982                                                |
| HLA-DQA1*01:02/DQB1*06:14 | 0                                                 | 7                                                               | 1523                                                           | 5536                                                |

Allele combinations are ordered alphabetically.

## General binding prediction tendencies for *HLA-DQA1/DQB1*

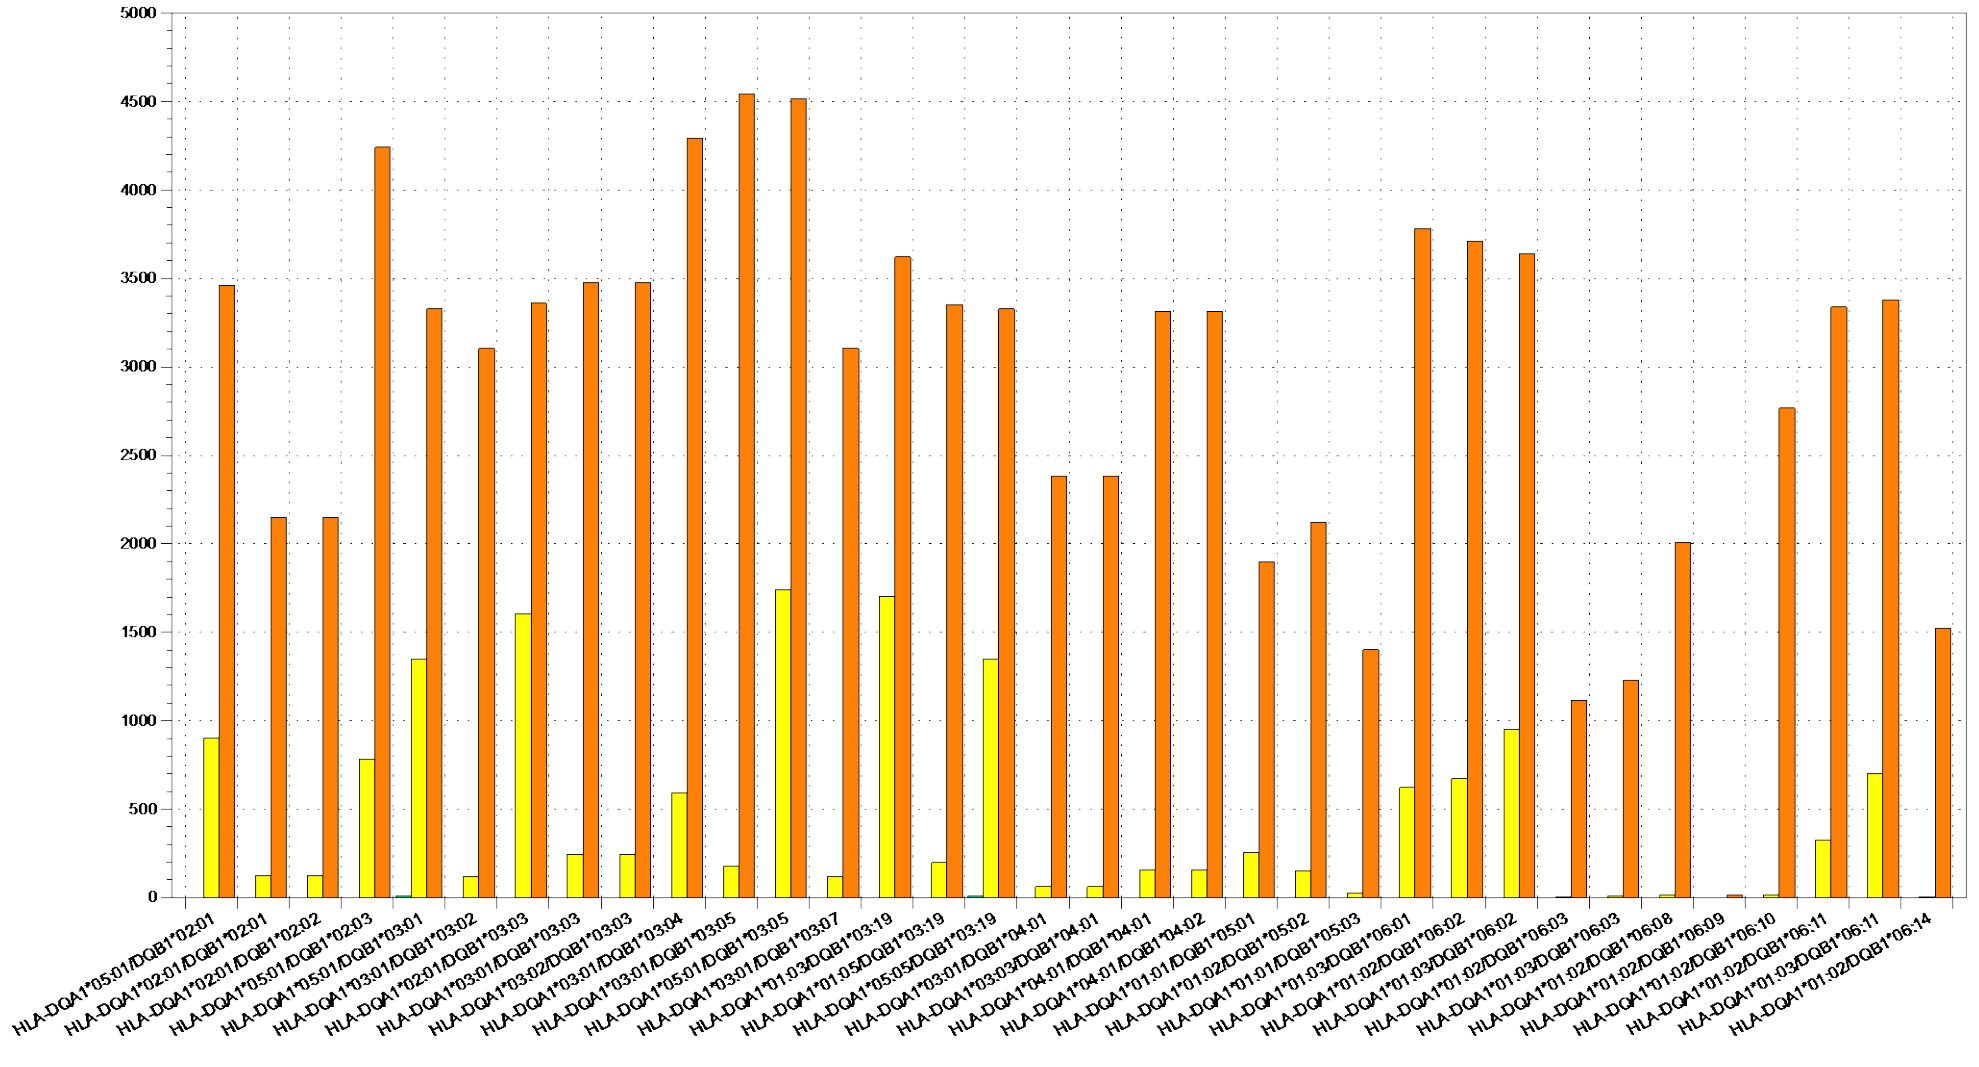

Allele combinations are ordered alphabetically on the x-axis, while the number of peptides binding with strong ( $IC_{50} \leq 50$  nM), regular ( $50$  nM  $< IC_{50} \leq 1000$  nM) and weak ( $1000$  nM  $< IC_{50} \leq 5000$  nM) binding prediction are displayed on the y-axis.

**HLA-DQA1/-DQB1 alleles ordered by number of presented peptides with strong binding prediction**

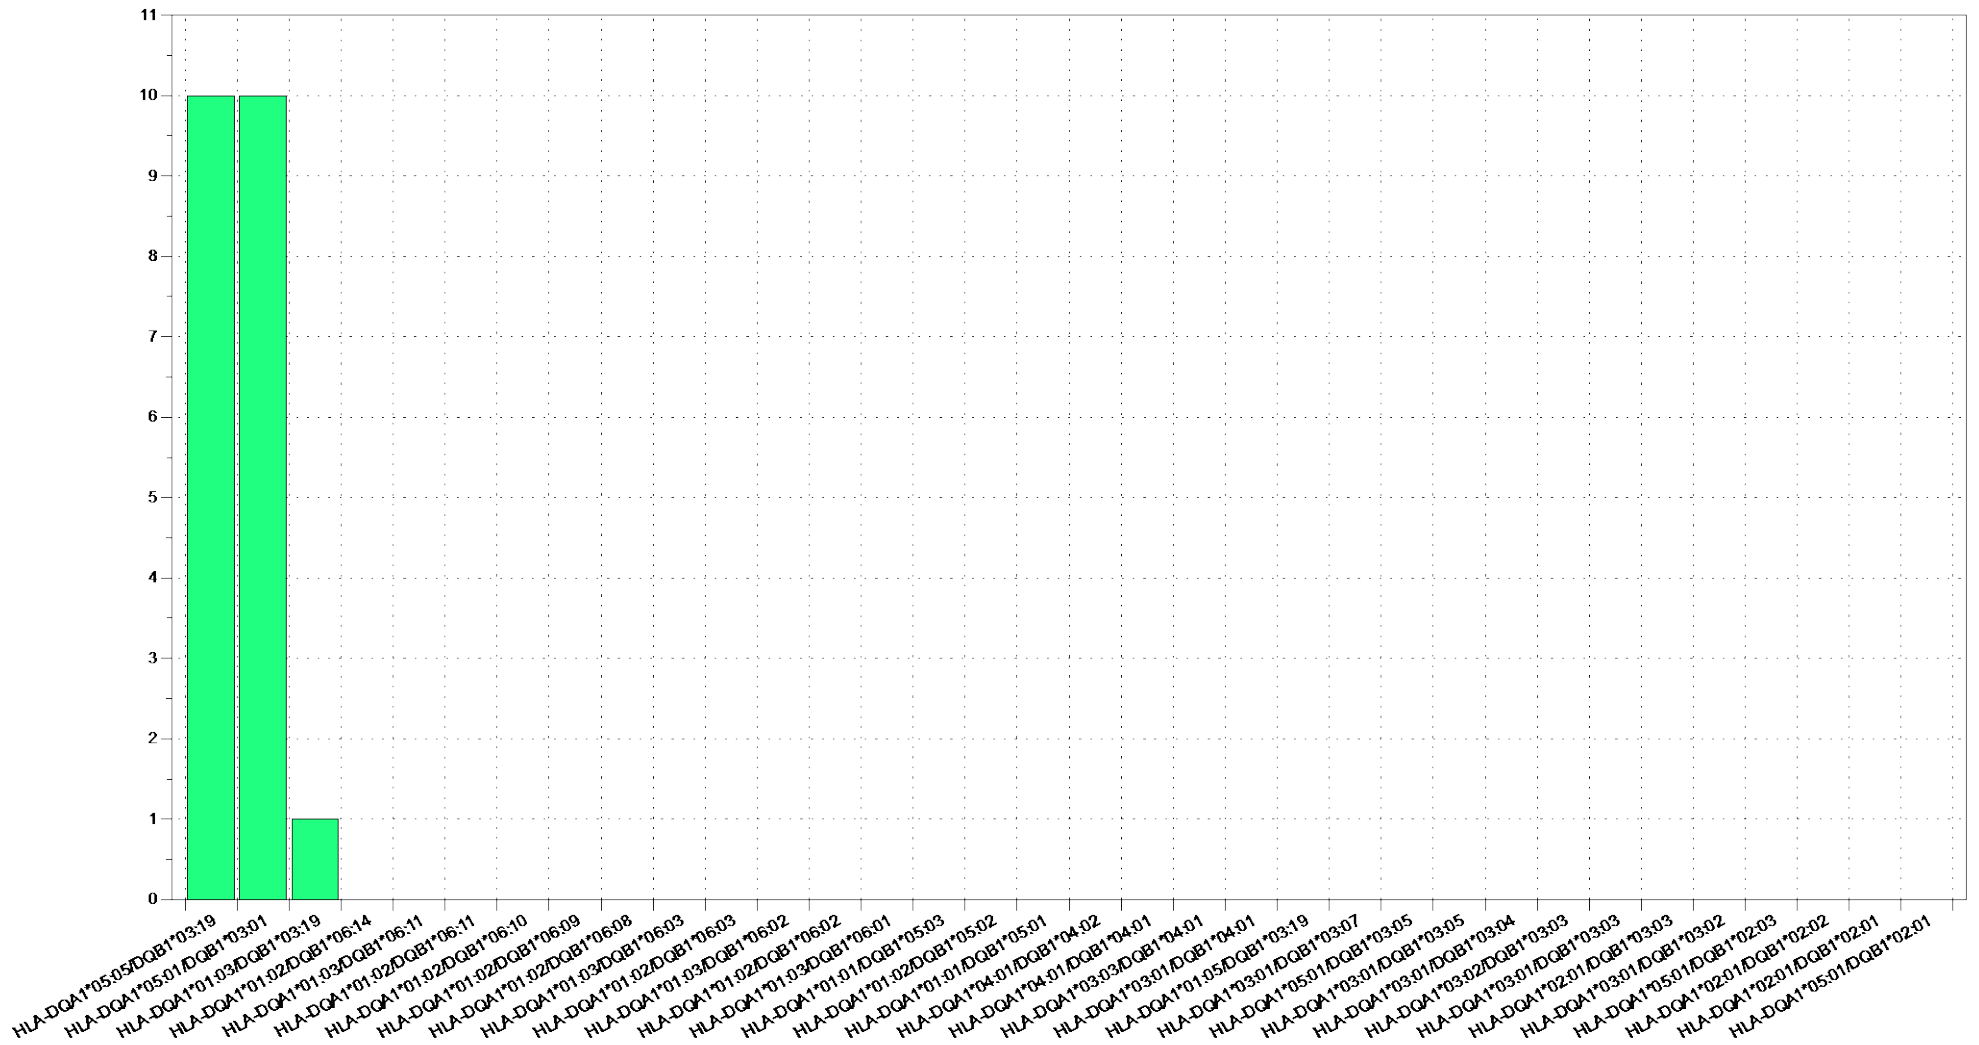

Allele combinations are ordered on the x-axis by their strong ( $IC_{50} \leq 50$  nM) binding prediction and the number of peptides presented are displayed on the y-axis.

## HLA-DQA1/-DQB1 alleles ordered by number of presented peptides with regular binding prediction

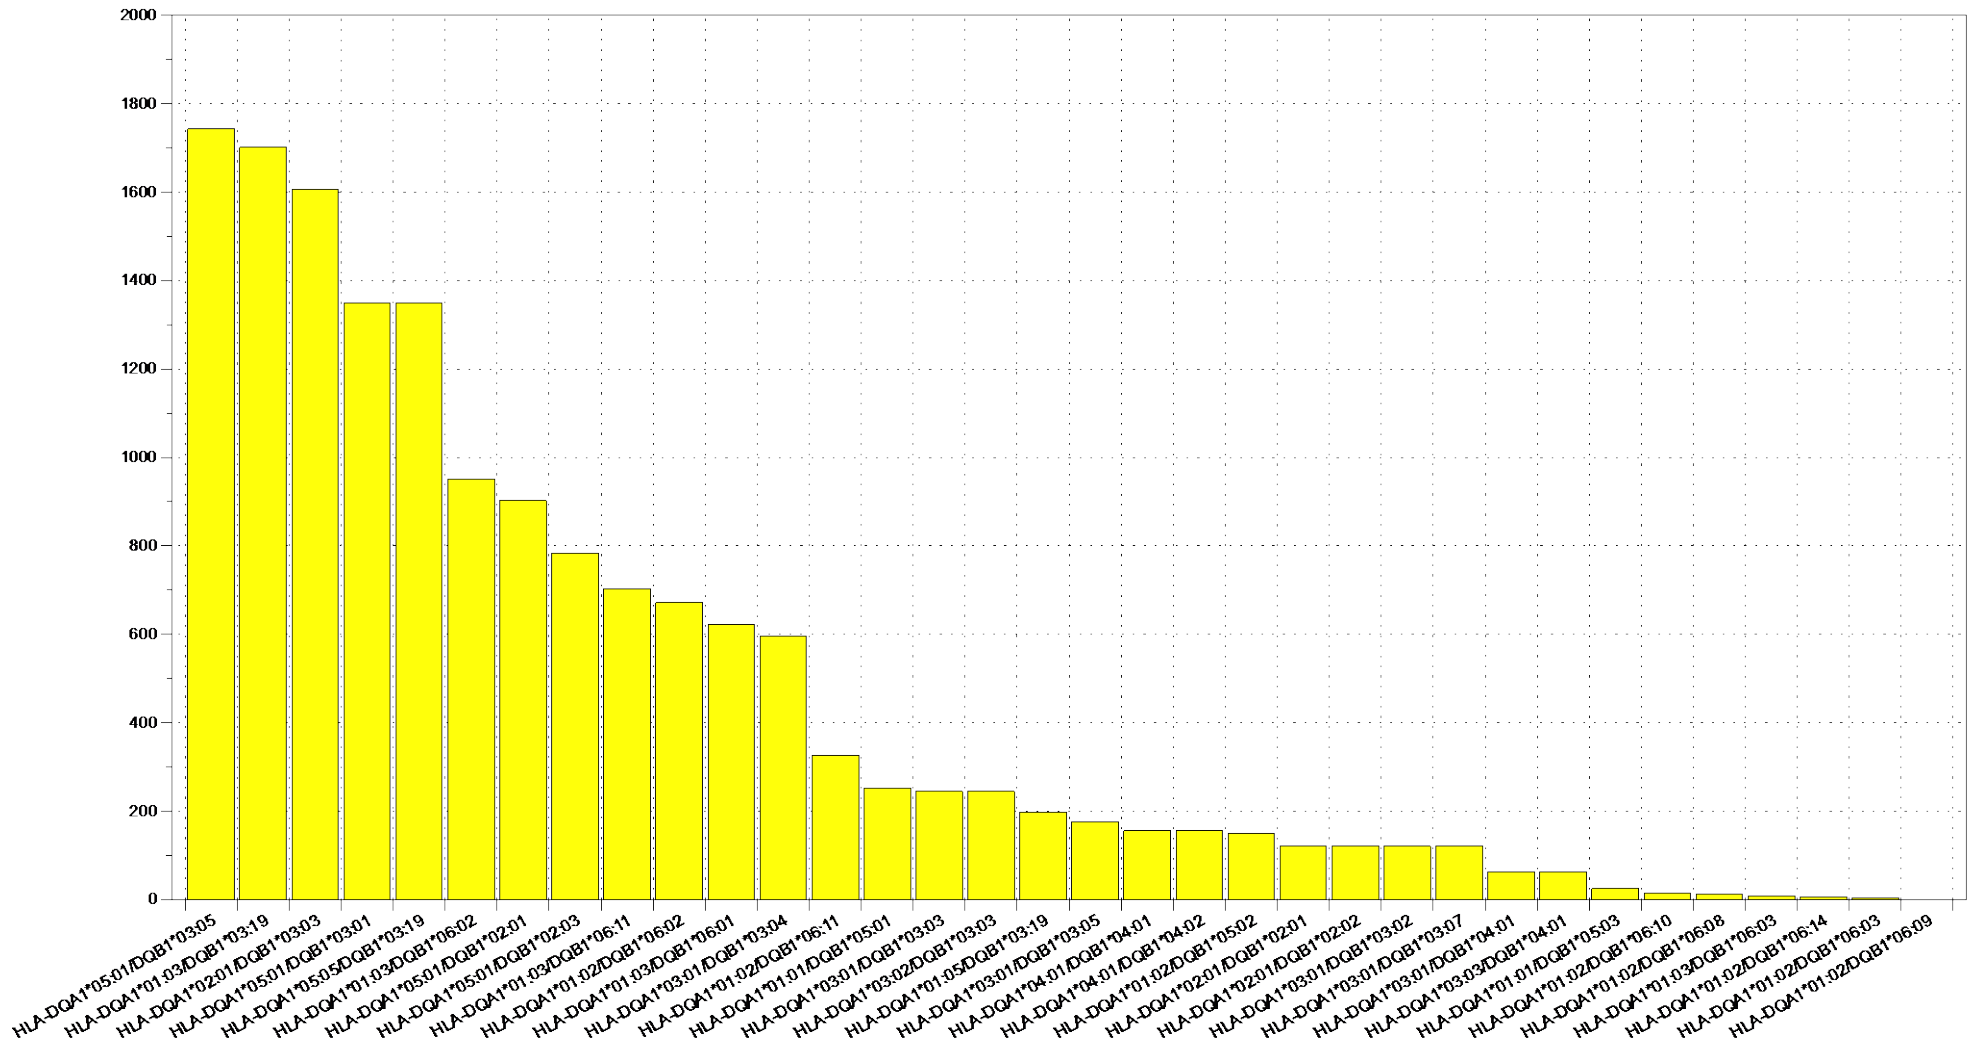

Allele combinations are ordered on the x-axis by their regular (50 nM < IC<sub>50</sub> ≤ 1000 nM) binding prediction and the number of peptides presented are displayed on the y-axis.

## HLA-DQA1/-DQB1 alleles ordered by number of presented peptides with weak binding prediction

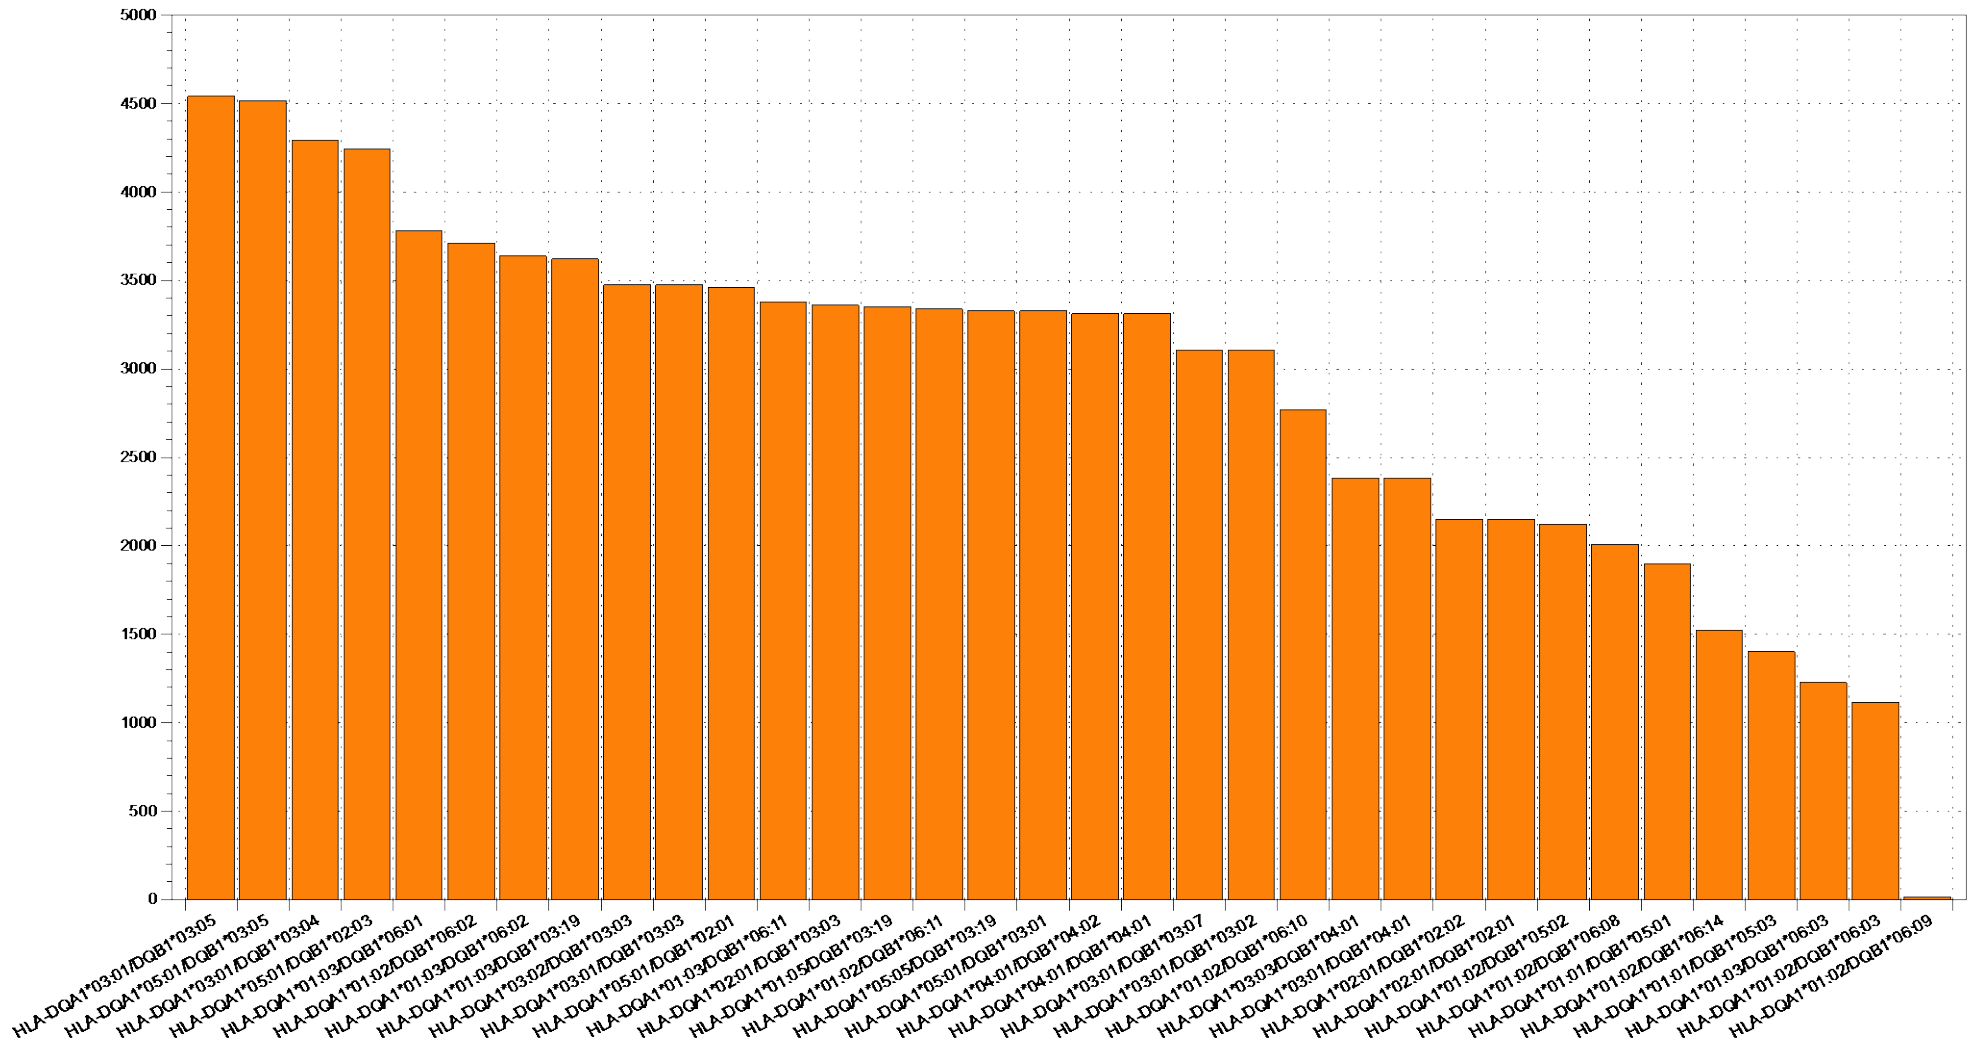

Allele combinations are ordered on the x-axis by their weak ( $1000 \text{ nM} < IC_{50} \leq 5000 \text{ nM}$ ) binding prediction and the number of peptides presented are displayed on the y-axis.
