# Supplementary material
Source: PubMed Central journal article supplement (PMC7300650)
Supplement: TAN-96-277-s006.pdf [file TAN-96-277-s006.pdf]

# Binding affinities of 438 HLA Class I and II proteins to the complete proteomes of seven (potentially) pandemic viruses and distributions of strongest and weakest HLA peptide binders in human populations worldwide

## Supplementary material 2

### Extended results for the binding predictions for SARS-CoV-1

#### Table of Contents

|                                                                                                            |    |
|------------------------------------------------------------------------------------------------------------|----|
| TOTAL NUMBER OF PEPTIDES WITH STRONG, REGULAR AND WEAK BINDING PREDICTIONS FOR <i>HLA-A</i> .....          | 2  |
| GENERAL BINDING PREDICTION TENDENCIES FOR <i>HLA-A</i> .....                                               | 4  |
| <i>HLA-A</i> ALLELES ORDERED BY NUMBER OF PRESENTED PEPTIDES WITH STRONG BINDING PREDICTION .....          | 5  |
| <i>HLA-A</i> ALLELES ORDERED BY NUMBER OF PRESENTED PEPTIDES WITH REGULAR BINDING PREDICTION.....          | 6  |
| <i>HLA-A</i> ALLELES ORDERED BY NUMBER OF PRESENTED PEPTIDES WITH WEAK BINDING PREDICTION.....             | 7  |
| TOTAL NUMBER OF PEPTIDES WITH STRONG, REGULAR AND WEAK BINDING PREDICTIONS FOR <i>HLA-B</i> .....          | 8  |
| GENERAL BINDING PREDICTION TENDENCIES FOR <i>HLA-B</i> .....                                               | 11 |
| <i>HLA-B</i> ALLELES ORDERED BY NUMBER OF PRESENTED PEPTIDES WITH STRONG BINDING PREDICTION .....          | 12 |
| <i>HLA-B</i> ALLELES ORDERED BY NUMBER OF PRESENTED PEPTIDES WITH REGULAR BINDING PREDICTION .....         | 13 |
| <i>HLA-B</i> ALLELES ORDERED BY NUMBER OF PRESENTED PEPTIDES WITH WEAK BINDING PREDICTION .....            | 14 |
| TOTAL NUMBER OF PEPTIDES WITH STRONG, REGULAR AND WEAK BINDING PREDICTIONS FOR <i>HLA-C</i> .....          | 15 |
| GENERAL BINDING PREDICTION TENDENCIES FOR <i>HLA-C</i> .....                                               | 16 |
| <i>HLA-C</i> ALLELES ORDERED BY NUMBER OF PRESENTED PEPTIDES WITH STRONG BINDING PREDICTION .....          | 17 |
| <i>HLA-C</i> ALLELES ORDERED BY NUMBER OF PRESENTED PEPTIDES WITH REGULAR BINDING PREDICTION .....         | 18 |
| <i>HLA-C</i> ALLELES ORDERED BY NUMBER OF PRESENTED PEPTIDES WITH WEAK BINDING PREDICTION .....            | 19 |
| TOTAL NUMBER OF PEPTIDES WITH STRONG, REGULAR AND WEAK BINDING PREDICTIONS FOR <i>HLA-DRB1</i> .....       | 20 |
| GENERAL BINDING PREDICTION TENDENCIES FOR <i>HLA-DRB1</i> .....                                            | 22 |
| <i>HLA-DRB1</i> ALLELES ORDERED BY NUMBER OF PRESENTED PEPTIDES WITH STRONG BINDING PREDICTION .....       | 23 |
| <i>HLA-DRB1</i> ALLELES ORDERED BY NUMBER OF PRESENTED PEPTIDES WITH REGULAR BINDING PREDICTION .....      | 24 |
| <i>HLA-DRB1</i> ALLELES ORDERED BY NUMBER OF PRESENTED PEPTIDES WITH WEAK BINDING PREDICTION .....         | 25 |
| TOTAL NUMBER OF PEPTIDES WITH STRONG, REGULAR AND WEAK BINDING PREDICTIONS FOR <i>HLA-DQA1/-DQB1</i> ....  | 26 |
| GENERAL BINDING PREDICTION TENDENCIES FOR <i>HLA-DQA1/-DQB1</i> .....                                      | 27 |
| <i>HLA-DQA1/-DQB1</i> ALLELES ORDERED BY NUMBER OF PRESENTED PEPTIDES WITH STRONG BINDING PREDICTION ..... | 28 |
| <i>HLA-DQA1/-DQB1</i> ALLELES ORDERED BY NUMBER OF PRESENTED PEPTIDES WITH REGULAR BINDING PREDICTION .... | 29 |
| <i>HLA-DQA1/-DQB1</i> ALLELES ORDERED BY NUMBER OF PRESENTED PEPTIDES WITH WEAK BINDING PREDICTION .....   | 30 |

## Total number of peptides with strong, regular and weak binding predictions for *HLA-A*

|             | <b>IC<sub>50</sub> ≤ 50 nM</b><br>Strong binders | <b>50 nM &lt; IC<sub>50</sub> ≤ 500 nM</b><br>Regular binders | <b>500 nM &lt; IC<sub>50</sub> ≤ 5000 nM</b><br>Weak binders | <b>IC<sub>50</sub> &gt; 5000 nM</b><br>Non binders |
|-------------|--------------------------------------------------|---------------------------------------------------------------|--------------------------------------------------------------|----------------------------------------------------|
| HLA-A*01:01 | 9                                                | 31                                                            | 167                                                          | 6858                                               |
| HLA-A*01:02 | 2                                                | 22                                                            | 248                                                          | 6793                                               |
| HLA-A*01:03 | 6                                                | 24                                                            | 144                                                          | 6891                                               |
| HLA-A*01:06 | 2                                                | 48                                                            | 188                                                          | 6827                                               |
| HLA-A*02:01 | 102                                              | 201                                                           | 441                                                          | 6321                                               |
| HLA-A*02:02 | 169                                              | 279                                                           | 701                                                          | 5916                                               |
| HLA-A*02:03 | 168                                              | 272                                                           | 676                                                          | 5949                                               |
| HLA-A*02:04 | 36                                               | 102                                                           | 332                                                          | 6595                                               |
| HLA-A*02:05 | 98                                               | 299                                                           | 924                                                          | 5744                                               |
| HLA-A*02:06 | 145                                              | 311                                                           | 799                                                          | 5810                                               |
| HLA-A*02:07 | 8                                                | 24                                                            | 134                                                          | 6899                                               |
| HLA-A*02:08 | 50                                               | 255                                                           | 921                                                          | 5839                                               |
| HLA-A*02:09 | 102                                              | 201                                                           | 441                                                          | 6321                                               |
| HLA-A*02:10 | 39                                               | 147                                                           | 554                                                          | 6325                                               |
| HLA-A*02:11 | 271                                              | 302                                                           | 623                                                          | 5869                                               |
| HLA-A*02:12 | 128                                              | 191                                                           | 411                                                          | 6335                                               |
| HLA-A*02:14 | 82                                               | 262                                                           | 771                                                          | 5950                                               |
| HLA-A*02:17 | 18                                               | 73                                                            | 294                                                          | 6680                                               |
| HLA-A*02:19 | 70                                               | 133                                                           | 333                                                          | 6529                                               |
| HLA-A*02:20 | 69                                               | 167                                                           | 448                                                          | 6381                                               |
| HLA-A*02:22 | 217                                              | 304                                                           | 743                                                          | 5801                                               |
| HLA-A*02:24 | 102                                              | 201                                                           | 441                                                          | 6321                                               |
| HLA-A*02:26 | 86                                               | 211                                                           | 459                                                          | 6309                                               |
| HLA-A*02:34 | 73                                               | 177                                                           | 445                                                          | 6370                                               |
| HLA-A*02:35 | 105                                              | 250                                                           | 555                                                          | 6155                                               |
| HLA-A*02:36 | 63                                               | 134                                                           | 369                                                          | 6499                                               |
| HLA-A*02:40 | 102                                              | 201                                                           | 441                                                          | 6321                                               |
| HLA-A*03:01 | 32                                               | 127                                                           | 255                                                          | 6651                                               |
| HLA-A*03:02 | 35                                               | 149                                                           | 301                                                          | 6580                                               |
| HLA-A*03:05 | 32                                               | 127                                                           | 255                                                          | 6651                                               |
| HLA-A*03:08 | 10                                               | 103                                                           | 272                                                          | 6680                                               |
| HLA-A*11:01 | 83                                               | 162                                                           | 316                                                          | 6504                                               |
| HLA-A*11:02 | 83                                               | 162                                                           | 316                                                          | 6504                                               |
| HLA-A*11:03 | 66                                               | 181                                                           | 358                                                          | 6460                                               |
| HLA-A*11:04 | 58                                               | 173                                                           | 307                                                          | 6527                                               |
| HLA-A*11:06 | 43                                               | 163                                                           | 366                                                          | 6493                                               |
| HLA-A*11:12 | 83                                               | 162                                                           | 316                                                          | 6504                                               |
| HLA-A*23:01 | 26                                               | 108                                                           | 317                                                          | 6614                                               |
| HLA-A*23:03 | 26                                               | 108                                                           | 317                                                          | 6614                                               |
| HLA-A*23:04 | 99                                               | 178                                                           | 524                                                          | 6264                                               |
| HLA-A*24:02 | 15                                               | 82                                                            | 232                                                          | 6736                                               |
| HLA-A*24:03 | 92                                               | 132                                                           | 400                                                          | 6441                                               |
| HLA-A*24:04 | 1                                                | 56                                                            | 273                                                          | 6735                                               |
| HLA-A*24:05 | 15                                               | 82                                                            | 232                                                          | 6736                                               |
| HLA-A*24:06 | 11                                               | 86                                                            | 289                                                          | 6679                                               |
| HLA-A*24:07 | 7                                                | 62                                                            | 233                                                          | 6763                                               |
| HLA-A*24:08 | 2                                                | 66                                                            | 303                                                          | 6694                                               |
| HLA-A*24:10 | 78                                               | 145                                                           | 481                                                          | 6361                                               |
| HLA-A*24:13 | 26                                               | 108                                                           | 317                                                          | 6614                                               |
| HLA-A*24:20 | 15                                               | 82                                                            | 232                                                          | 6736                                               |
| HLA-A*24:21 | 15                                               | 82                                                            | 232                                                          | 6736                                               |
| HLA-A*24:23 | 92                                               | 132                                                           | 400                                                          | 6441                                               |
| HLA-A*25:01 | 1                                                | 14                                                            | 114                                                          | 6936                                               |
| HLA-A*25:02 | 1                                                | 13                                                            | 134                                                          | 6917                                               |
| HLA-A*26:01 | 8                                                | 48                                                            | 207                                                          | 6802                                               |
| HLA-A*26:02 | 50                                               | 166                                                           | 532                                                          | 6317                                               |
| HLA-A*26:03 | 2                                                | 41                                                            | 317                                                          | 6705                                               |
| HLA-A*26:05 | 7                                                | 41                                                            | 205                                                          | 6812                                               |
| HLA-A*26:08 | 6                                                | 63                                                            | 343                                                          | 6653                                               |
| HLA-A*26:12 | 8                                                | 49                                                            | 316                                                          | 6692                                               |
| HLA-A*26:18 | 8                                                | 49                                                            | 316                                                          | 6692                                               |
| HLA-A*29:01 | 60                                               | 142                                                           | 389                                                          | 6474                                               |

|             | <b>IC<sub>50</sub> ≤ 50 nM</b><br><b>Strong binders</b> | <b>50 nM &lt; IC<sub>50</sub> ≤ 500 nM</b><br><b>Regular binders</b> | <b>500 nM &lt; IC<sub>50</sub> ≤ 5000 nM</b><br><b>Weak binders</b> | <b>IC<sub>50</sub> &gt; 5000 nM</b><br><b>Non binders</b> |
|-------------|---------------------------------------------------------|----------------------------------------------------------------------|---------------------------------------------------------------------|-----------------------------------------------------------|
| HLA-A*29:02 | 60                                                      | 142                                                                  | 389                                                                 | 6474                                                      |
| HLA-A*30:01 | 54                                                      | 292                                                                  | 1157                                                                | 5562                                                      |
| HLA-A*30:02 | 25                                                      | 125                                                                  | 459                                                                 | 6456                                                      |
| HLA-A*30:04 | 0                                                       | 69                                                                   | 745                                                                 | 6251                                                      |
| HLA-A*30:08 | 2                                                       | 54                                                                   | 514                                                                 | 6495                                                      |
| HLA-A*31:01 | 47                                                      | 159                                                                  | 440                                                                 | 6419                                                      |
| HLA-A*31:02 | 35                                                      | 173                                                                  | 491                                                                 | 6366                                                      |
| HLA-A*31:04 | 79                                                      | 220                                                                  | 510                                                                 | 6256                                                      |
| HLA-A*31:08 | 39                                                      | 200                                                                  | 779                                                                 | 6047                                                      |
| HLA-A*32:01 | 30                                                      | 148                                                                  | 545                                                                 | 6342                                                      |
| HLA-A*32:02 | 13                                                      | 105                                                                  | 489                                                                 | 6458                                                      |
| HLA-A*32:03 | 11                                                      | 84                                                                   | 446                                                                 | 6524                                                      |
| HLA-A*33:01 | 20                                                      | 84                                                                   | 244                                                                 | 6717                                                      |
| HLA-A*33:03 | 32                                                      | 120                                                                  | 305                                                                 | 6608                                                      |
| HLA-A*34:01 | 4                                                       | 98                                                                   | 700                                                                 | 6263                                                      |
| HLA-A*34:02 | 18                                                      | 186                                                                  | 438                                                                 | 6423                                                      |
| HLA-A*36:01 | 5                                                       | 54                                                                   | 297                                                                 | 6709                                                      |
| HLA-A*43:01 | 2                                                       | 46                                                                   | 328                                                                 | 6689                                                      |
| HLA-A*66:01 | 4                                                       | 43                                                                   | 418                                                                 | 6600                                                      |
| HLA-A*66:02 | 5                                                       | 76                                                                   | 621                                                                 | 6363                                                      |
| HLA-A*66:03 | 2                                                       | 47                                                                   | 487                                                                 | 6529                                                      |
| HLA-A*68:01 | 106                                                     | 190                                                                  | 506                                                                 | 6263                                                      |
| HLA-A*68:02 | 93                                                      | 229                                                                  | 694                                                                 | 6049                                                      |
| HLA-A*68:03 | 52                                                      | 156                                                                  | 420                                                                 | 6437                                                      |
| HLA-A*68:06 | 2                                                       | 90                                                                   | 589                                                                 | 6384                                                      |
| HLA-A*68:12 | 106                                                     | 190                                                                  | 506                                                                 | 6263                                                      |
| HLA-A*69:01 | 50                                                      | 169                                                                  | 600                                                                 | 6246                                                      |
| HLA-A*74:01 | 1                                                       | 40                                                                   | 250                                                                 | 6774                                                      |
| HLA-A*74:03 | 1                                                       | 40                                                                   | 250                                                                 | 6774                                                      |
| HLA-A*80:01 | 17                                                      | 53                                                                   | 148                                                                 | 6847                                                      |

Alleles are ordered alphabetically.

## General binding prediction tendencies for *HLA-A*

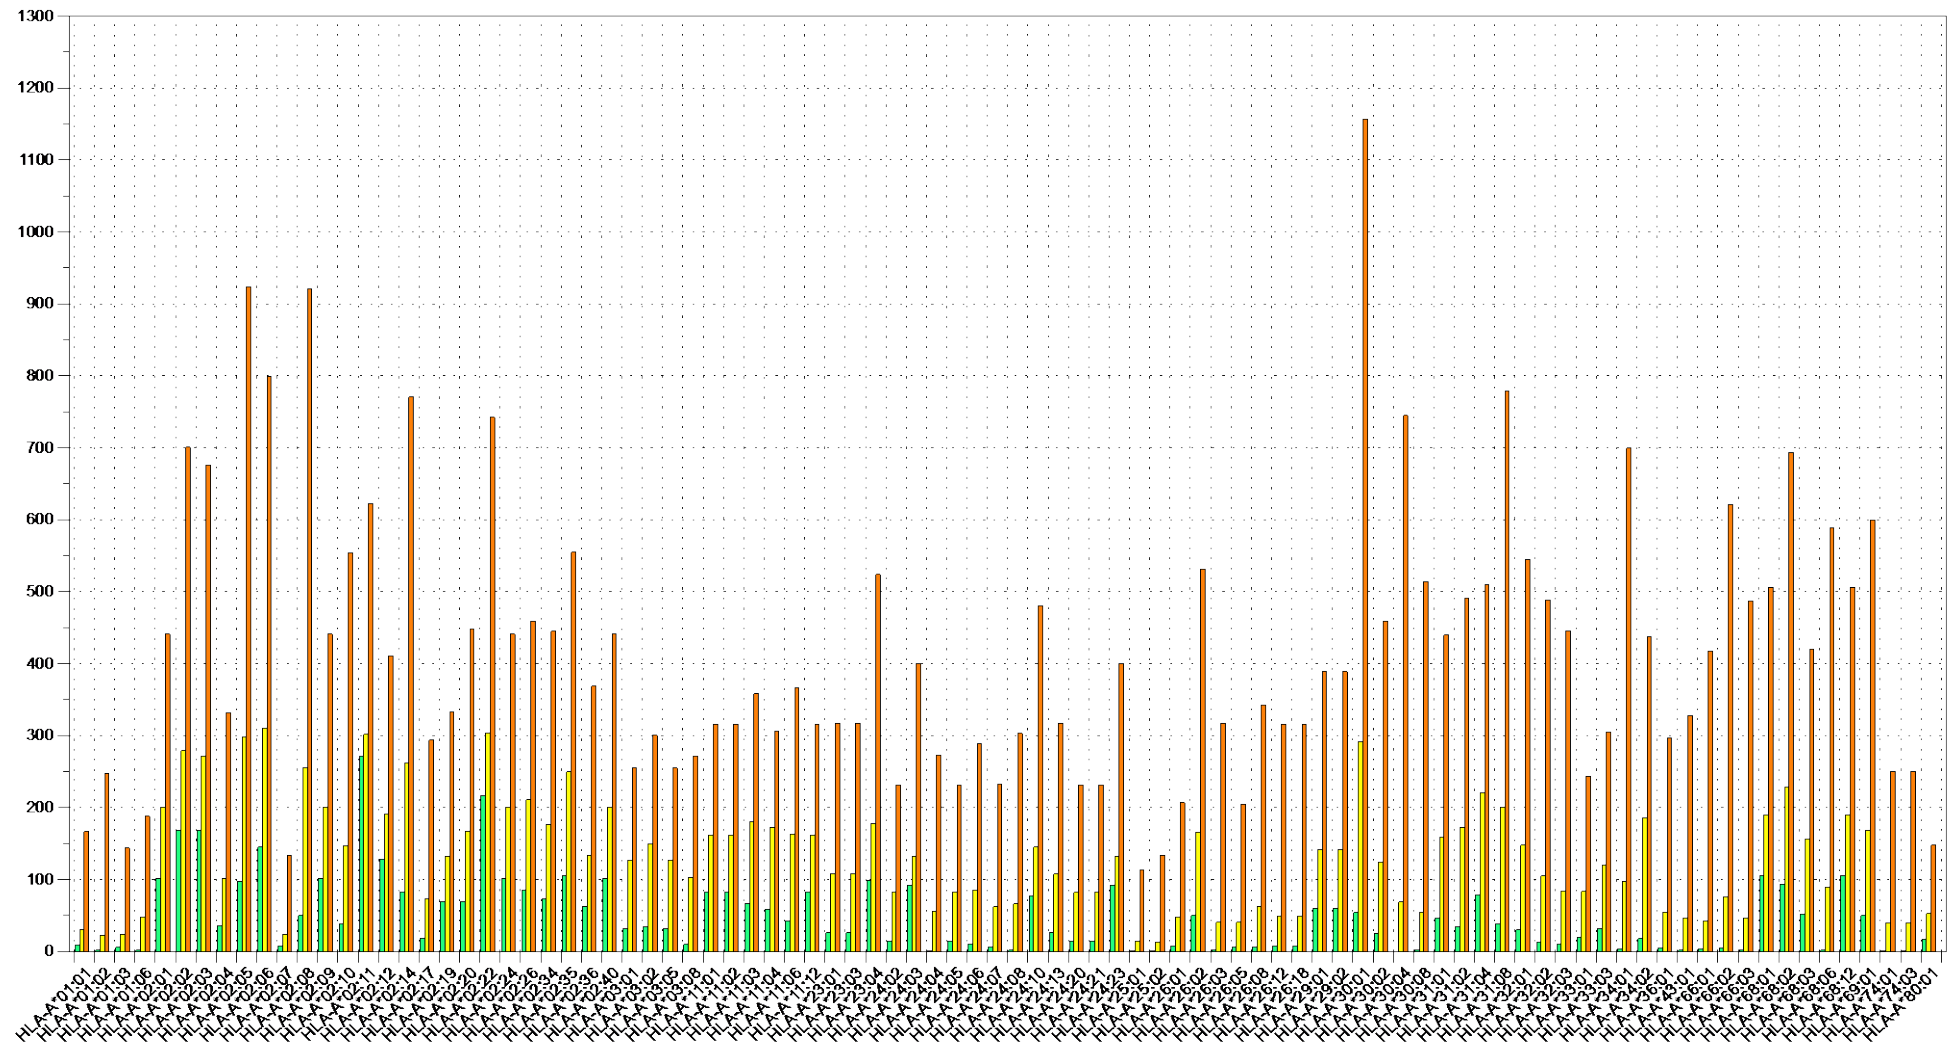

Alleles are ordered alphabetically on the x-axis, while the number of peptides binding with strong ( $IC_{50} \leq 50$  nM), regular ( $50 \text{ nM} < IC_{50} \leq 500$  nM) and weak ( $500 \text{ nM} < IC_{50} \leq 5000$  nM) binding prediction are displayed on the y-axis.



## HLA-A alleles ordered by number of presented peptides with regular binding prediction

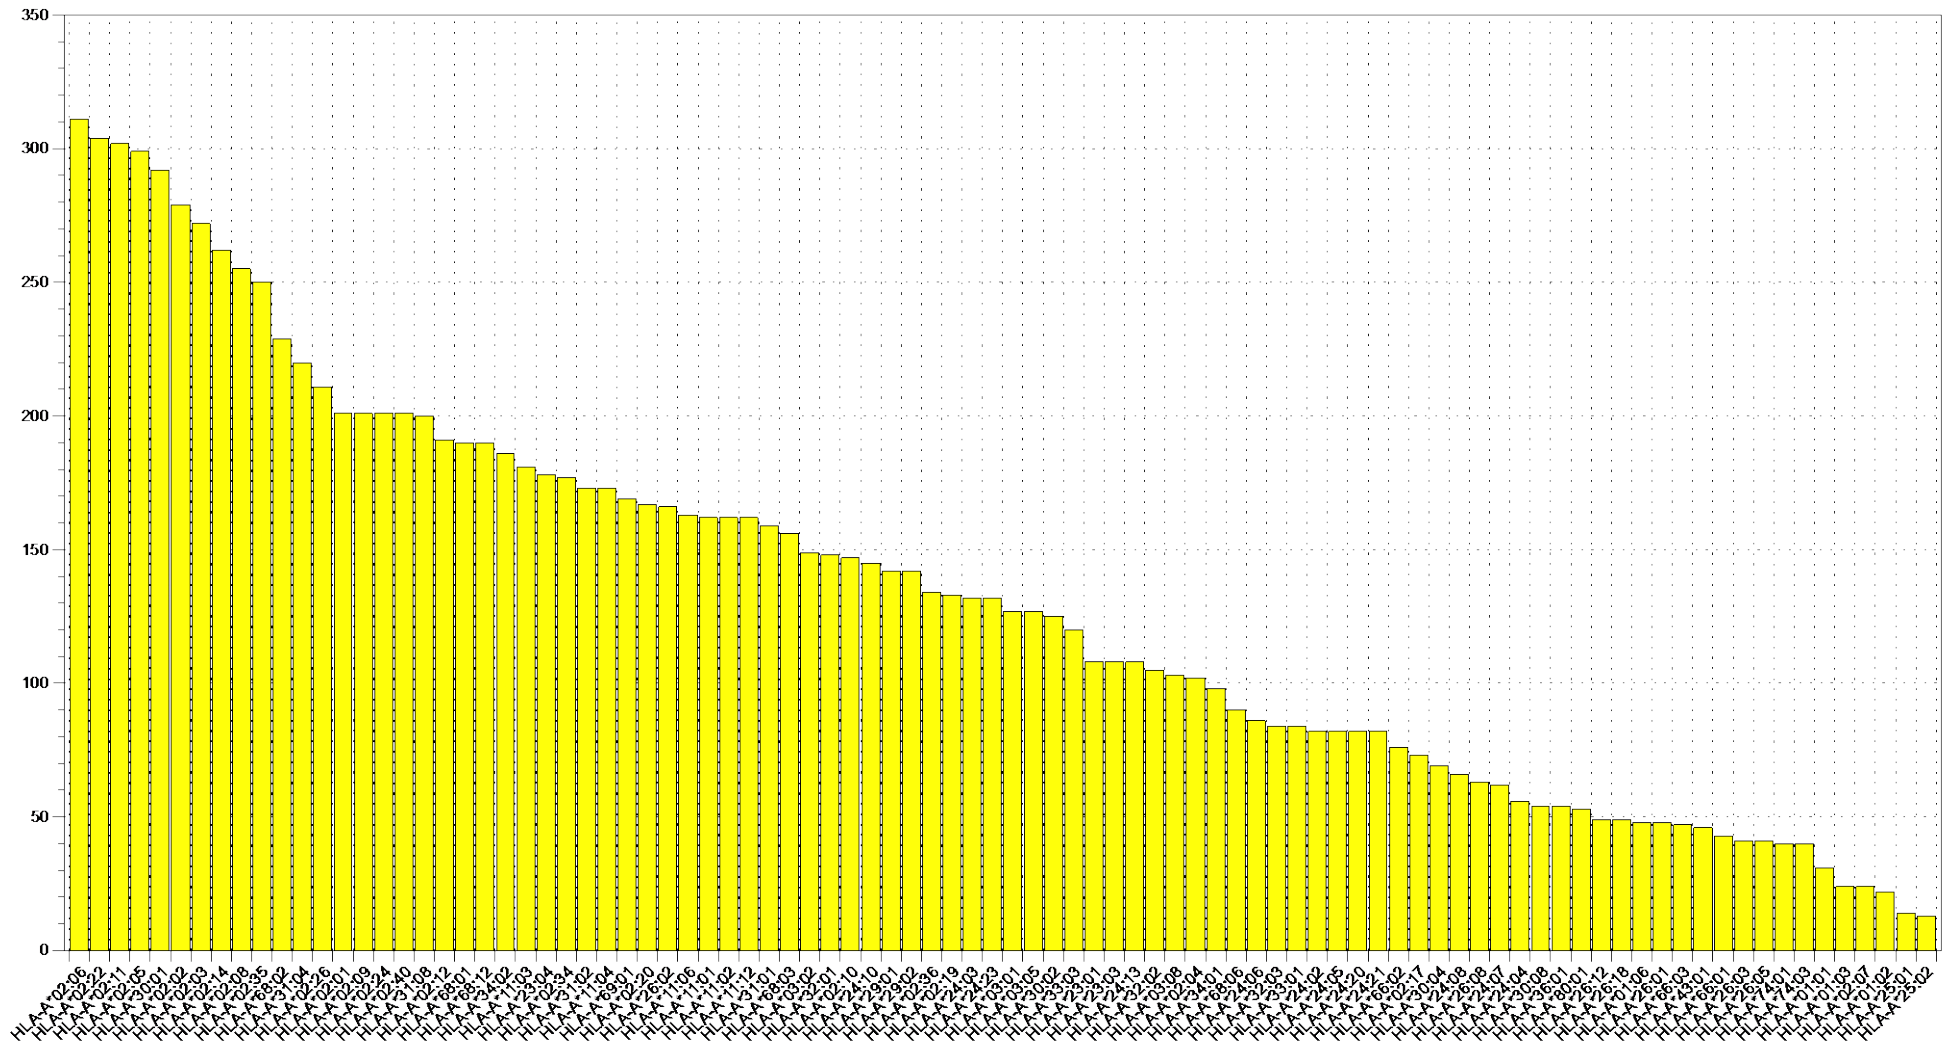

Alleles are ordered on the x-axis by their regular ( $50 \text{ nM} < IC_{50} \leq 500 \text{ nM}$ ) binding prediction and the number of peptides presented are displayed on the y-axis.

## HLA-A alleles ordered by number of presented peptides with weak binding prediction

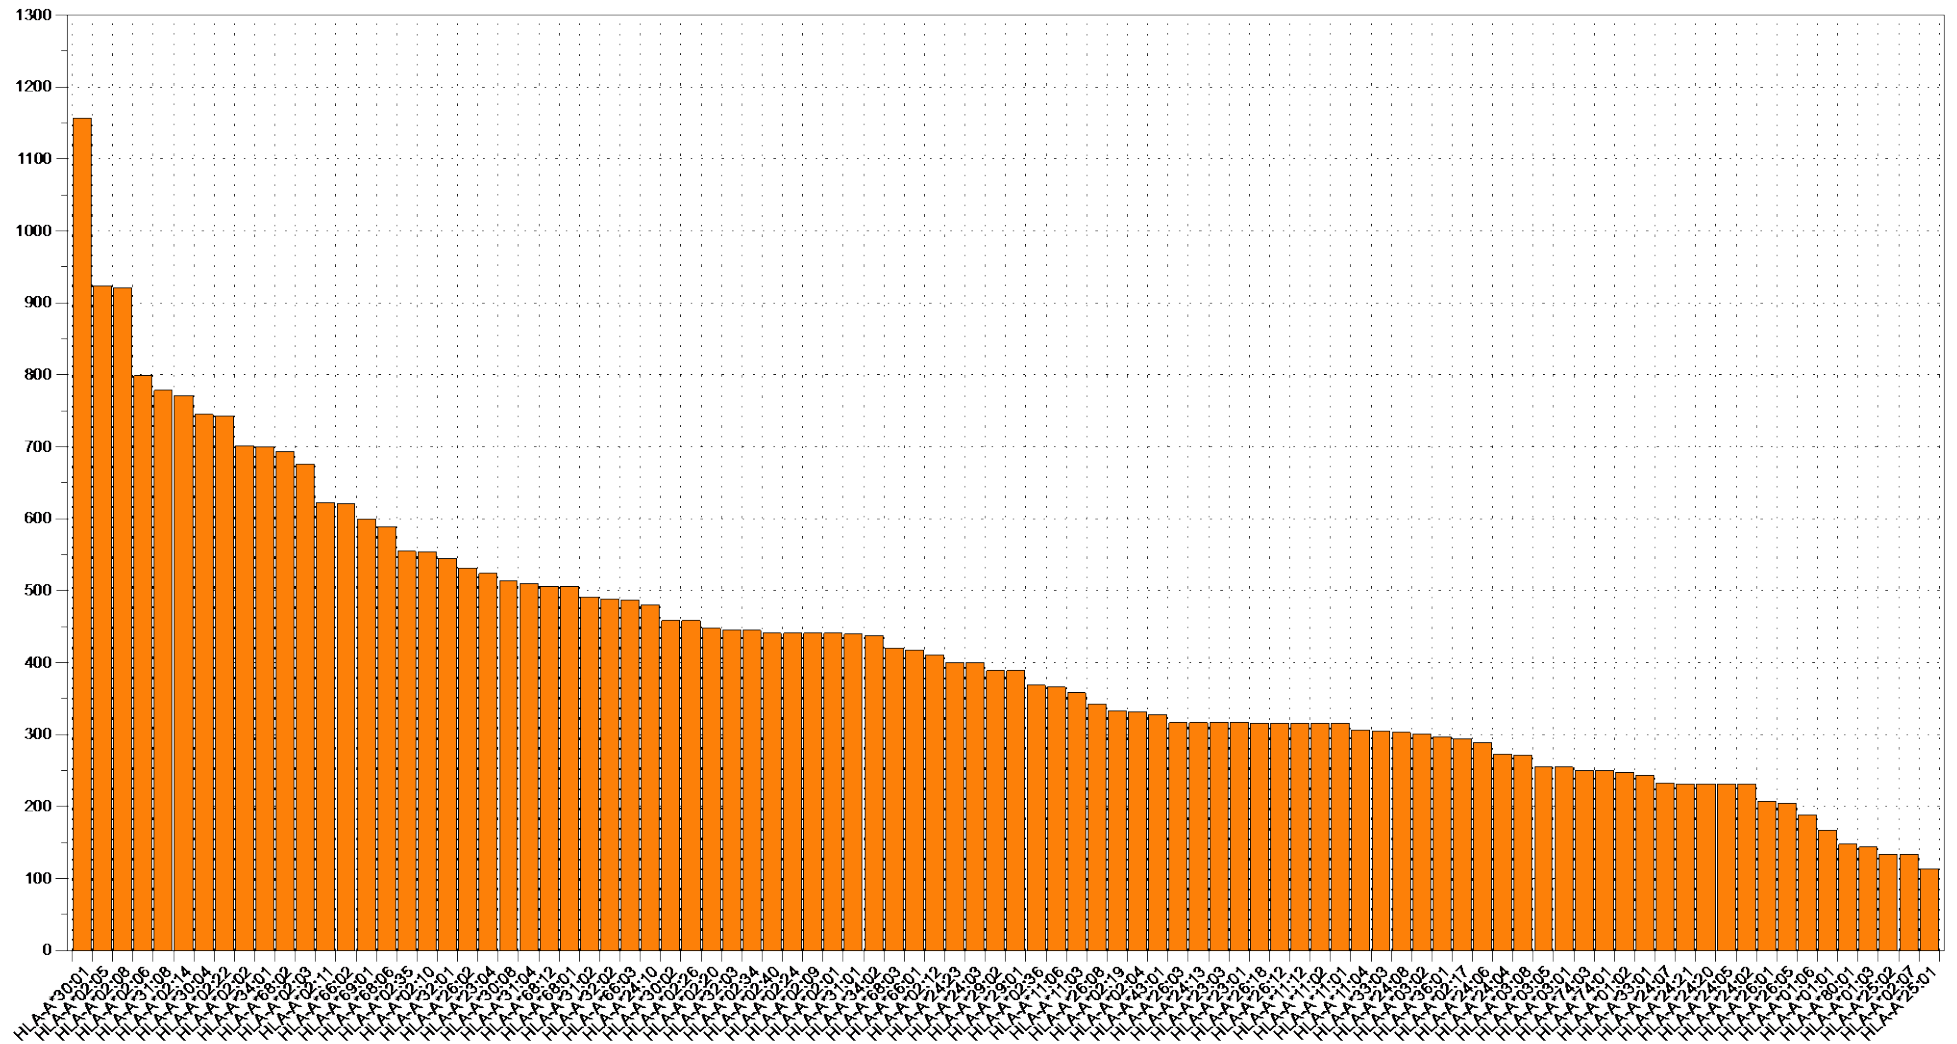

Alleles are ordered on the x-axis by their weak ( $500 \text{ nM} < \text{IC}_{50} \leq 5000 \text{ nM}$ ) binding prediction and the number of peptides presented are displayed on the y-axis.

## Total number of peptides with strong, regular and weak binding predictions for *HLA-B*

|             | <b>IC<sub>50</sub> ≤ 50 nM</b><br>Strong binders | <b>50 nM &lt; IC<sub>50</sub> ≤ 500 nM</b><br>Regular binders | <b>500 nM &lt; IC<sub>50</sub> ≤ 5000 nM</b><br>Weak binders | <b>IC<sub>50</sub> &gt; 5000 nM</b><br>Non binders |
|-------------|--------------------------------------------------|---------------------------------------------------------------|--------------------------------------------------------------|----------------------------------------------------|
| HLA-B*07:02 | 20                                               | 56                                                            | 247                                                          | 6742                                               |
| HLA-B*07:04 | 9                                                | 59                                                            | 277                                                          | 6720                                               |
| HLA-B*07:05 | 21                                               | 71                                                            | 299                                                          | 6674                                               |
| HLA-B*07:06 | 21                                               | 71                                                            | 299                                                          | 6674                                               |
| HLA-B*08:01 | 14                                               | 78                                                            | 434                                                          | 6539                                               |
| HLA-B*08:03 | 0                                                | 2                                                             | 49                                                           | 7014                                               |
| HLA-B*08:04 | 4                                                | 34                                                            | 402                                                          | 6625                                               |
| HLA-B*08:05 | 5                                                | 41                                                            | 371                                                          | 6648                                               |
| HLA-B*13:01 | 2                                                | 66                                                            | 666                                                          | 6331                                               |
| HLA-B*13:02 | 0                                                | 12                                                            | 328                                                          | 6725                                               |
| HLA-B*13:03 | 0                                                | 10                                                            | 375                                                          | 6680                                               |
| HLA-B*13:04 | 0                                                | 25                                                            | 601                                                          | 6439                                               |
| HLA-B*14:01 | 1                                                | 20                                                            | 203                                                          | 6841                                               |
| HLA-B*14:02 | 1                                                | 20                                                            | 203                                                          | 6841                                               |
| HLA-B*14:03 | 0                                                | 13                                                            | 239                                                          | 6813                                               |
| HLA-B*15:01 | 59                                               | 191                                                           | 642                                                          | 6173                                               |
| HLA-B*15:02 | 31                                               | 163                                                           | 559                                                          | 6312                                               |
| HLA-B*15:03 | 209                                              | 433                                                           | 1190                                                         | 5233                                               |
| HLA-B*15:04 | 0                                                | 37                                                            | 672                                                          | 6356                                               |
| HLA-B*15:05 | 42                                               | 235                                                           | 778                                                          | 6010                                               |
| HLA-B*15:06 | 60                                               | 209                                                           | 677                                                          | 6119                                               |
| HLA-B*15:07 | 27                                               | 160                                                           | 609                                                          | 6269                                               |
| HLA-B*15:08 | 2                                                | 47                                                            | 350                                                          | 6666                                               |
| HLA-B*15:09 | 3                                                | 10                                                            | 113                                                          | 6939                                               |
| HLA-B*15:10 | 2                                                | 9                                                             | 113                                                          | 6941                                               |
| HLA-B*15:11 | 4                                                | 46                                                            | 348                                                          | 6667                                               |
| HLA-B*15:12 | 6                                                | 84                                                            | 413                                                          | 6562                                               |
| HLA-B*15:13 | 0                                                | 30                                                            | 479                                                          | 6556                                               |
| HLA-B*15:15 | 13                                               | 132                                                           | 510                                                          | 6410                                               |
| HLA-B*15:16 | 32                                               | 198                                                           | 664                                                          | 6171                                               |
| HLA-B*15:17 | 144                                              | 261                                                           | 568                                                          | 6092                                               |
| HLA-B*15:18 | 2                                                | 55                                                            | 392                                                          | 6616                                               |
| HLA-B*15:20 | 44                                               | 223                                                           | 761                                                          | 6037                                               |
| HLA-B*15:21 | 0                                                | 26                                                            | 285                                                          | 6754                                               |
| HLA-B*15:24 | 0                                                | 52                                                            | 524                                                          | 6489                                               |
| HLA-B*15:25 | 96                                               | 223                                                           | 784                                                          | 5962                                               |
| HLA-B*15:27 | 32                                               | 166                                                           | 521                                                          | 6346                                               |
| HLA-B*15:29 | 68                                               | 280                                                           | 939                                                          | 5778                                               |
| HLA-B*15:31 | 15                                               | 147                                                           | 645                                                          | 6258                                               |
| HLA-B*15:32 | 45                                               | 216                                                           | 802                                                          | 6002                                               |
| HLA-B*15:34 | 59                                               | 191                                                           | 642                                                          | 6173                                               |
| HLA-B*15:35 | 24                                               | 140                                                           | 563                                                          | 6338                                               |
| HLA-B*15:38 | 42                                               | 196                                                           | 718                                                          | 6109                                               |
| HLA-B*15:39 | 95                                               | 232                                                           | 808                                                          | 5930                                               |
| HLA-B*15:40 | 17                                               | 132                                                           | 549                                                          | 6367                                               |
| HLA-B*15:58 | 0                                                | 23                                                            | 323                                                          | 6719                                               |
| HLA-B*18:01 | 5                                                | 39                                                            | 238                                                          | 6783                                               |
| HLA-B*18:02 | 4                                                | 44                                                            | 339                                                          | 6678                                               |
| HLA-B*18:03 | 2                                                | 33                                                            | 292                                                          | 6738                                               |
| HLA-B*18:05 | 5                                                | 39                                                            | 238                                                          | 6783                                               |
| HLA-B*18:07 | 4                                                | 27                                                            | 332                                                          | 6702                                               |
| HLA-B*27:02 | 0                                                | 11                                                            | 68                                                           | 6986                                               |
| HLA-B*27:03 | 0                                                | 2                                                             | 51                                                           | 7012                                               |
| HLA-B*27:04 | 2                                                | 14                                                            | 108                                                          | 6941                                               |
| HLA-B*27:05 | 8                                                | 57                                                            | 194                                                          | 6806                                               |
| HLA-B*27:06 | 17                                               | 58                                                            | 241                                                          | 6749                                               |
| HLA-B*27:07 | 25                                               | 94                                                            | 323                                                          | 6623                                               |
| HLA-B*27:08 | 10                                               | 47                                                            | 231                                                          | 6777                                               |
| HLA-B*27:09 | 17                                               | 61                                                            | 241                                                          | 6746                                               |
| HLA-B*27:12 | 10                                               | 86                                                            | 311                                                          | 6658                                               |
| HLA-B*27:14 | 0                                                | 17                                                            | 144                                                          | 6904                                               |
| HLA-B*35:01 | 54                                               | 167                                                           | 521                                                          | 6323                                               |



|             | IC <sub>50</sub> ≤ 50 nM<br>Strong binders | 50 nM < IC <sub>50</sub> ≤ 500 nM<br>Regular binders | 500 nM < IC <sub>50</sub> ≤ 5000 nM<br>Weak binders | IC <sub>50</sub> > 5000 nM<br>Non binders |
|-------------|--------------------------------------------|------------------------------------------------------|-----------------------------------------------------|-------------------------------------------|
| HLA-B*35:02 | 3                                          | 36                                                   | 177                                                 | 6849                                      |
| HLA-B*35:03 | 2                                          | 19                                                   | 117                                                 | 6927                                      |
| HLA-B*35:04 | 3                                          | 36                                                   | 177                                                 | 6849                                      |
| HLA-B*35:05 | 35                                         | 185                                                  | 651                                                 | 6194                                      |
| HLA-B*35:06 | 1                                          | 16                                                   | 102                                                 | 6946                                      |
| HLA-B*35:08 | 10                                         | 62                                                   | 297                                                 | 6696                                      |
| HLA-B*35:09 | 3                                          | 36                                                   | 177                                                 | 6849                                      |
| HLA-B*35:10 | 137                                        | 336                                                  | 946                                                 | 5646                                      |
| HLA-B*35:11 | 48                                         | 202                                                  | 684                                                 | 6131                                      |
| HLA-B*35:12 | 3                                          | 36                                                   | 177                                                 | 6849                                      |
| HLA-B*35:17 | 31                                         | 171                                                  | 570                                                 | 6293                                      |
| HLA-B*35:19 | 67                                         | 216                                                  | 694                                                 | 6088                                      |
| HLA-B*35:20 | 24                                         | 151                                                  | 731                                                 | 6159                                      |
| HLA-B*35:21 | 29                                         | 189                                                  | 681                                                 | 6166                                      |
| HLA-B*35:32 | 55                                         | 188                                                  | 564                                                 | 6258                                      |
| HLA-B*35:43 | 10                                         | 140                                                  | 584                                                 | 6331                                      |
| HLA-B*37:01 | 0                                          | 18                                                   | 208                                                 | 6839                                      |
| HLA-B*38:01 | 2                                          | 27                                                   | 168                                                 | 6868                                      |
| HLA-B*38:02 | 2                                          | 28                                                   | 177                                                 | 6858                                      |
| HLA-B*39:01 | 25                                         | 105                                                  | 376                                                 | 6559                                      |
| HLA-B*39:02 | 36                                         | 191                                                  | 897                                                 | 5941                                      |
| HLA-B*39:03 | 23                                         | 100                                                  | 421                                                 | 6521                                      |
| HLA-B*39:04 | 25                                         | 105                                                  | 376                                                 | 6559                                      |
| HLA-B*39:05 | 4                                          | 45                                                   | 182                                                 | 6834                                      |
| HLA-B*39:06 | 7                                          | 55                                                   | 237                                                 | 6766                                      |
| HLA-B*39:07 | 8                                          | 95                                                   | 563                                                 | 6399                                      |
| HLA-B*39:09 | 16                                         | 100                                                  | 475                                                 | 6474                                      |
| HLA-B*39:10 | 20                                         | 115                                                  | 531                                                 | 6399                                      |
| HLA-B*39:15 | 17                                         | 87                                                   | 342                                                 | 6619                                      |
| HLA-B*39:24 | 23                                         | 100                                                  | 421                                                 | 6521                                      |
| HLA-B*40:01 | 17                                         | 44                                                   | 133                                                 | 6871                                      |
| HLA-B*40:02 | 20                                         | 105                                                  | 240                                                 | 6700                                      |
| HLA-B*40:03 | 8                                          | 61                                                   | 348                                                 | 6648                                      |
| HLA-B*40:04 | 26                                         | 90                                                   | 216                                                 | 6733                                      |
| HLA-B*40:05 | 9                                          | 80                                                   | 367                                                 | 6609                                      |
| HLA-B*40:06 | 4                                          | 46                                                   | 182                                                 | 6833                                      |
| HLA-B*40:09 | 16                                         | 86                                                   | 228                                                 | 6735                                      |
| HLA-B*40:10 | 0                                          | 39                                                   | 131                                                 | 6895                                      |
| HLA-B*40:11 | 27                                         | 90                                                   | 210                                                 | 6738                                      |
| HLA-B*40:12 | 1                                          | 25                                                   | 131                                                 | 6908                                      |
| HLA-B*40:14 | 27                                         | 90                                                   | 210                                                 | 6738                                      |
| HLA-B*40:16 | 8                                          | 62                                                   | 241                                                 | 6754                                      |
| HLA-B*40:40 | 9                                          | 71                                                   | 398                                                 | 6587                                      |
| HLA-B*41:01 | 12                                         | 85                                                   | 205                                                 | 6763                                      |
| HLA-B*41:02 | 21                                         | 98                                                   | 289                                                 | 6657                                      |
| HLA-B*42:01 | 32                                         | 118                                                  | 485                                                 | 6430                                      |
| HLA-B*42:02 | 5                                          | 49                                                   | 326                                                 | 6685                                      |
| HLA-B*44:02 | 4                                          | 27                                                   | 132                                                 | 6902                                      |
| HLA-B*44:03 | 6                                          | 26                                                   | 142                                                 | 6891                                      |
| HLA-B*44:04 | 1                                          | 19                                                   | 100                                                 | 6945                                      |
| HLA-B*44:05 | 0                                          | 8                                                    | 88                                                  | 6969                                      |
| HLA-B*44:06 | 0                                          | 0                                                    | 60                                                  | 7005                                      |
| HLA-B*44:07 | 6                                          | 26                                                   | 142                                                 | 6891                                      |
| HLA-B*44:09 | 5                                          | 51                                                   | 307                                                 | 6702                                      |
| HLA-B*44:15 | 0                                          | 18                                                   | 112                                                 | 6935                                      |
| HLA-B*45:01 | 9                                          | 49                                                   | 154                                                 | 6853                                      |
| HLA-B*46:01 | 0                                          | 3                                                    | 92                                                  | 6970                                      |
| HLA-B*47:01 | 0                                          | 30                                                   | 449                                                 | 6586                                      |
| HLA-B*47:03 | 2                                          | 55                                                   | 393                                                 | 6615                                      |
| HLA-B*48:01 | 1                                          | 20                                                   | 94                                                  | 6950                                      |
| HLA-B*48:02 | 88                                         | 327                                                  | 1031                                                | 5619                                      |
| HLA-B*48:03 | 1                                          | 25                                                   | 131                                                 | 6908                                      |
| HLA-B*48:04 | 1                                          | 20                                                   | 94                                                  | 6950                                      |
| HLA-B*49:01 | 0                                          | 28                                                   | 139                                                 | 6898                                      |
| HLA-B*50:01 | 8                                          | 49                                                   | 241                                                 | 6767                                      |

|             | <b>IC<sub>50</sub> ≤ 50 nM</b><br><b>Strong binders</b> | <b>50 nM &lt; IC<sub>50</sub> ≤ 500 nM</b><br><b>Regular binders</b> | <b>500 nM &lt; IC<sub>50</sub> ≤ 5000 nM</b><br><b>Weak binders</b> | <b>IC<sub>50</sub> &gt; 5000 nM</b><br><b>Non binders</b> |
|-------------|---------------------------------------------------------|----------------------------------------------------------------------|---------------------------------------------------------------------|-----------------------------------------------------------|
| HLA-B*50:02 | 2                                                       | 36                                                                   | 134                                                                 | 6893                                                      |
| HLA-B*51:01 | 2                                                       | 20                                                                   | 111                                                                 | 6932                                                      |
| HLA-B*51:02 | 3                                                       | 26                                                                   | 148                                                                 | 6888                                                      |
| HLA-B*51:04 | 0                                                       | 8                                                                    | 155                                                                 | 6902                                                      |
| HLA-B*51:05 | 0                                                       | 8                                                                    | 62                                                                  | 6995                                                      |
| HLA-B*51:06 | 0                                                       | 11                                                                   | 178                                                                 | 6876                                                      |
| HLA-B*51:07 | 0                                                       | 0                                                                    | 52                                                                  | 7013                                                      |
| HLA-B*51:08 | 0                                                       | 7                                                                    | 105                                                                 | 6953                                                      |
| HLA-B*51:09 | 0                                                       | 12                                                                   | 108                                                                 | 6945                                                      |
| HLA-B*52:01 | 0                                                       | 2                                                                    | 112                                                                 | 6951                                                      |
| HLA-B*53:01 | 12                                                      | 60                                                                   | 320                                                                 | 6673                                                      |
| HLA-B*53:02 | 5                                                       | 42                                                                   | 313                                                                 | 6705                                                      |
| HLA-B*53:03 | 15                                                      | 154                                                                  | 696                                                                 | 6200                                                      |
| HLA-B*53:05 | 11                                                      | 61                                                                   | 342                                                                 | 6651                                                      |
| HLA-B*54:01 | 16                                                      | 44                                                                   | 208                                                                 | 6797                                                      |
| HLA-B*55:01 | 5                                                       | 30                                                                   | 217                                                                 | 6813                                                      |
| HLA-B*55:02 | 16                                                      | 58                                                                   | 305                                                                 | 6686                                                      |
| HLA-B*55:04 | 48                                                      | 133                                                                  | 612                                                                 | 6272                                                      |
| HLA-B*55:07 | 16                                                      | 44                                                                   | 208                                                                 | 6797                                                      |
| HLA-B*55:12 | 12                                                      | 50                                                                   | 307                                                                 | 6696                                                      |
| HLA-B*56:01 | 14                                                      | 46                                                                   | 272                                                                 | 6733                                                      |
| HLA-B*56:02 | 19                                                      | 85                                                                   | 461                                                                 | 6500                                                      |
| HLA-B*56:03 | 5                                                       | 113                                                                  | 734                                                                 | 6213                                                      |
| HLA-B*56:04 | 19                                                      | 85                                                                   | 461                                                                 | 6500                                                      |
| HLA-B*57:01 | 15                                                      | 61                                                                   | 329                                                                 | 6660                                                      |
| HLA-B*57:02 | 8                                                       | 57                                                                   | 249                                                                 | 6751                                                      |
| HLA-B*57:03 | 22                                                      | 99                                                                   | 360                                                                 | 6584                                                      |
| HLA-B*58:01 | 40                                                      | 120                                                                  | 473                                                                 | 6432                                                      |
| HLA-B*58:02 | 0                                                       | 4                                                                    | 50                                                                  | 7011                                                      |
| HLA-B*59:01 | 1                                                       | 26                                                                   | 253                                                                 | 6785                                                      |
| HLA-B*67:01 | 28                                                      | 86                                                                   | 394                                                                 | 6557                                                      |
| HLA-B*73:01 | 0                                                       | 4                                                                    | 109                                                                 | 6952                                                      |
| HLA-B*78:01 | 0                                                       | 33                                                                   | 219                                                                 | 6813                                                      |
| HLA-B*78:02 | 0                                                       | 14                                                                   | 132                                                                 | 6919                                                      |
| HLA-B*81:01 | 6                                                       | 29                                                                   | 148                                                                 | 6882                                                      |
| HLA-B*82:01 | 0                                                       | 8                                                                    | 119                                                                 | 6938                                                      |
| HLA-B*82:02 | 0                                                       | 8                                                                    | 119                                                                 | 6938                                                      |

Alleles are ordered alphabetically.

## General binding prediction tendencies for *HLA-B*

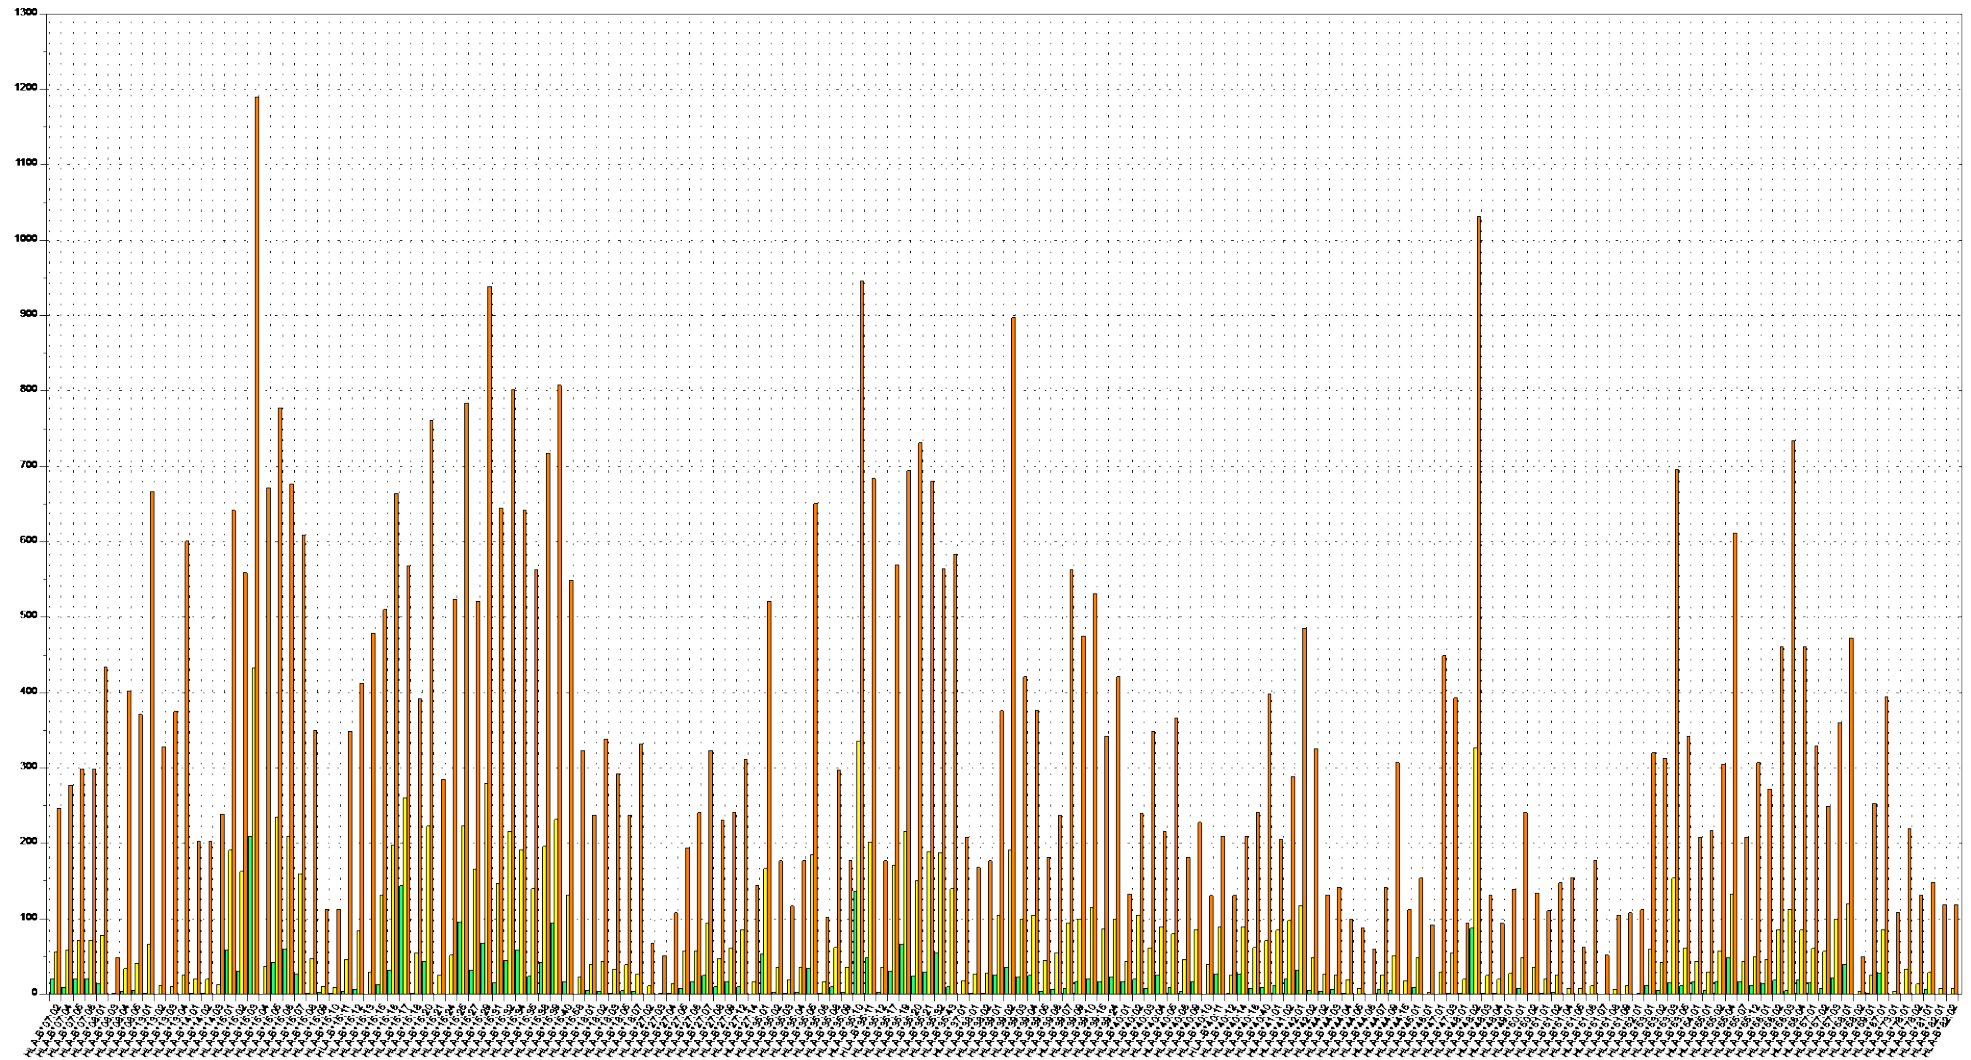

Alleles are ordered alphabetically on the x-axis, while the number of peptides binding with strong ( $IC_{50} \leq 50$  nM), regular ( $50$  nM  $< IC_{50} \leq 500$  nM) and weak ( $500$  nM  $< IC_{50} \leq 5000$  nM) binding prediction are displayed on the y-axis.

## HLA-B alleles ordered by number of presented peptides with strong binding prediction

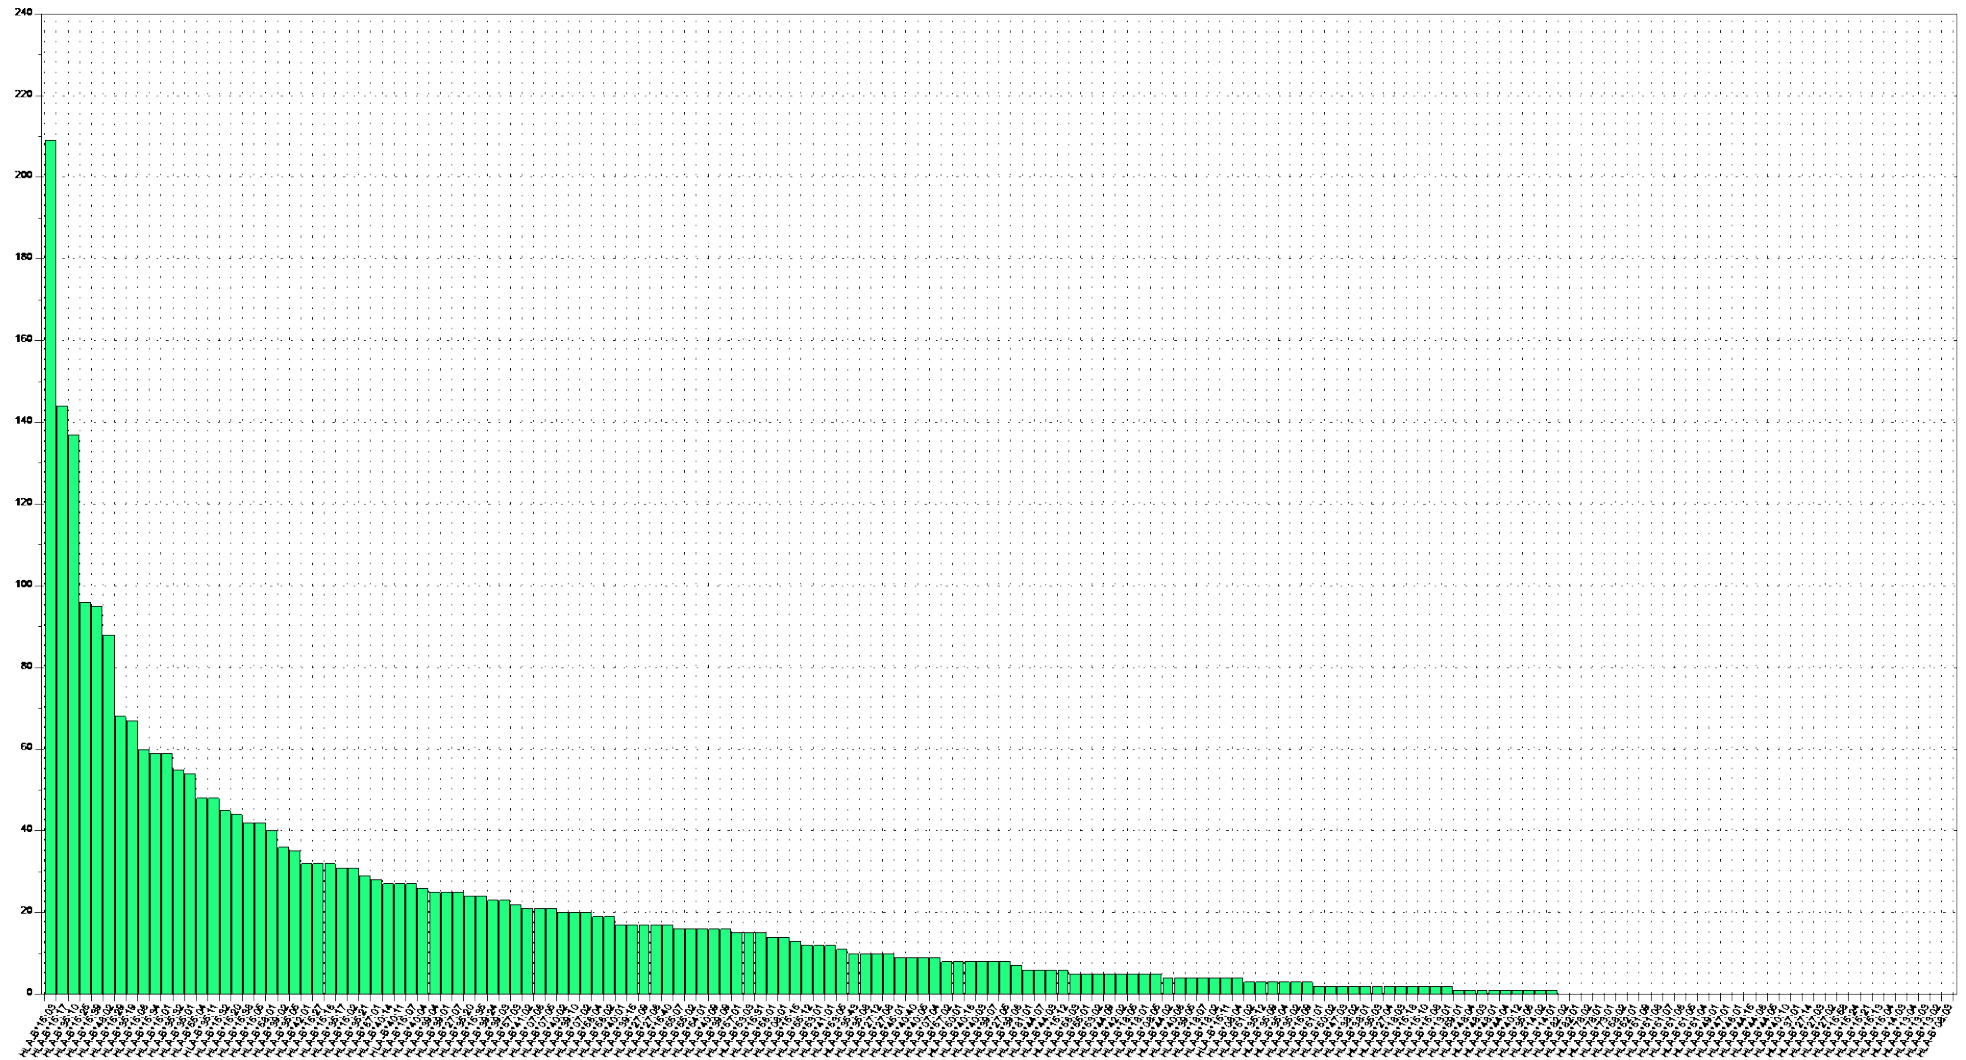

Alleles are ordered on the x-axis by their strong ( $IC_{50} \leq 50$  nM) binding prediction and the number of peptides presented are displayed on the y-axis.

## HLA-B alleles ordered by number of presented peptides with regular binding prediction

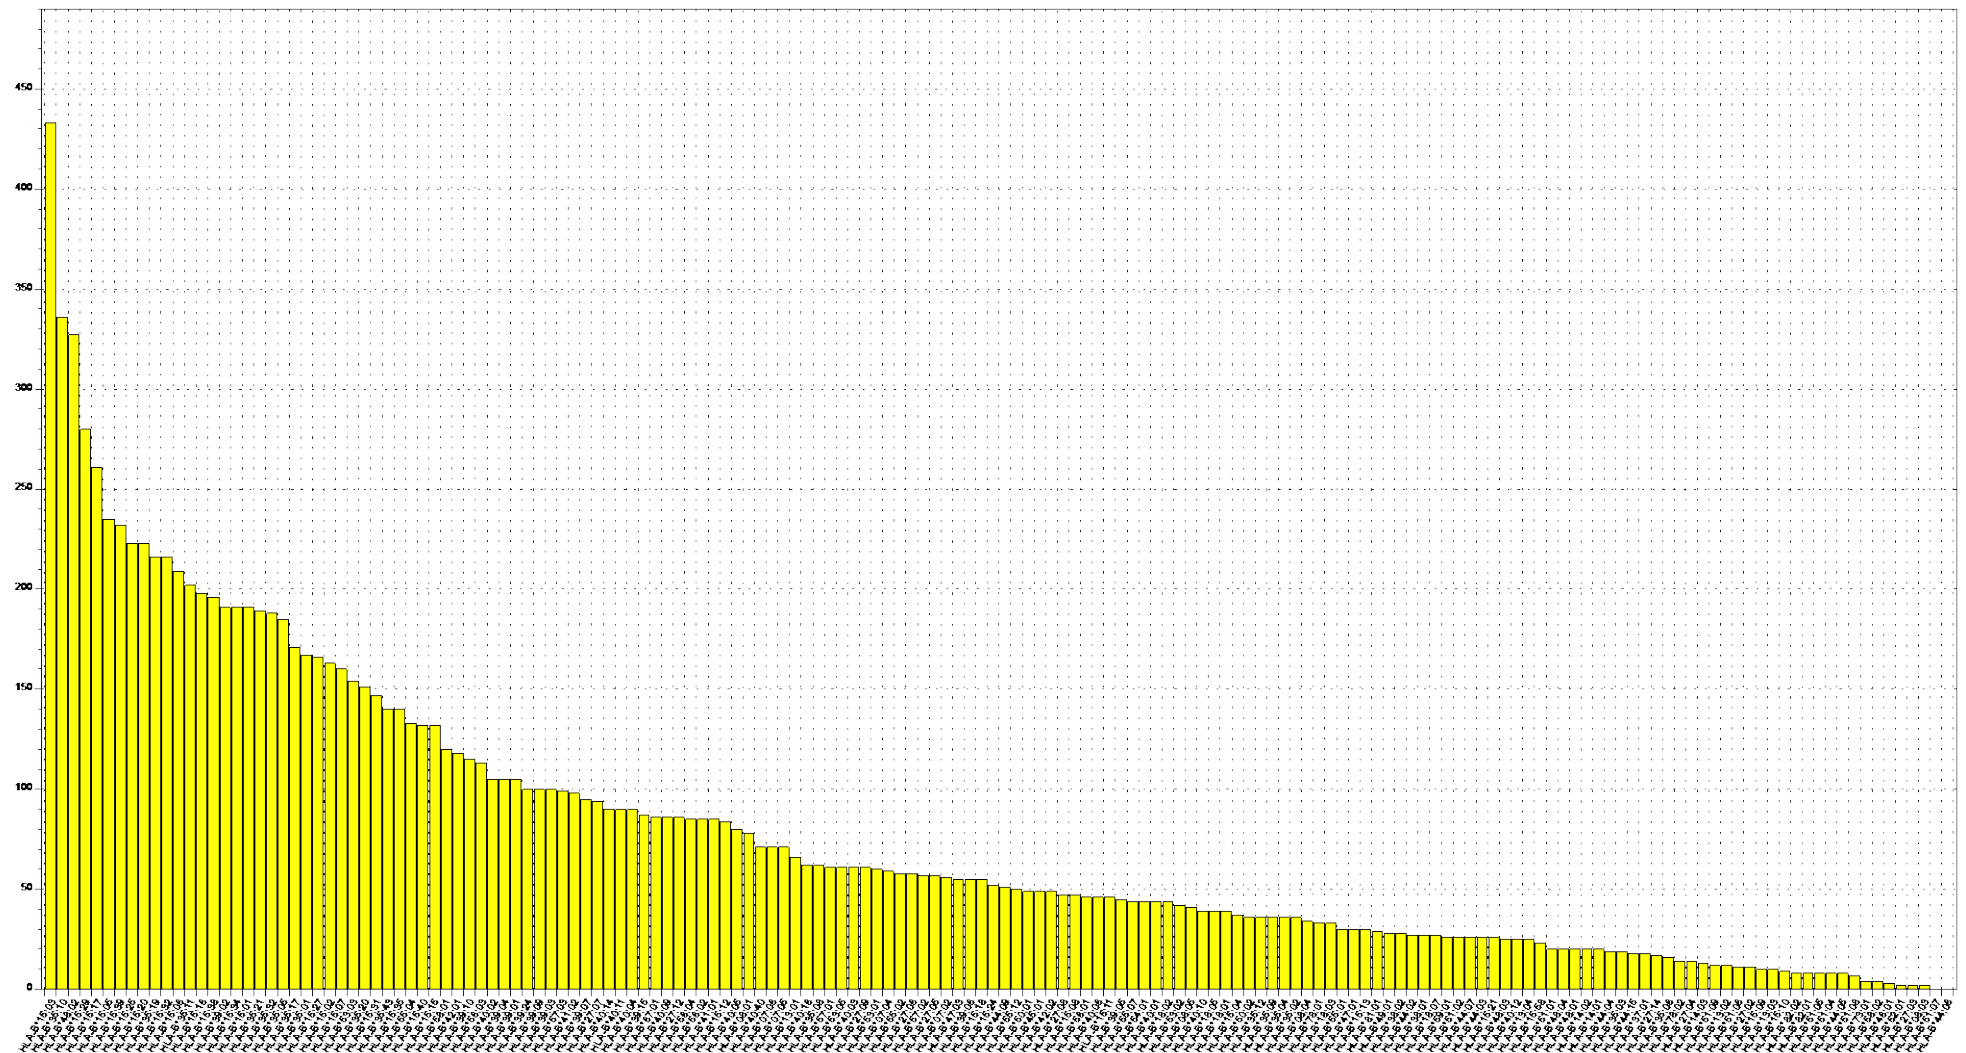

Alleles are ordered on the x-axis by their regular ( $50 \text{ nM} < IC_{50} \leq 500 \text{ nM}$ ) binding prediction and the number of peptides presented are displayed on the y-axis.

## HLA-B alleles ordered by number of presented peptides with weak binding prediction

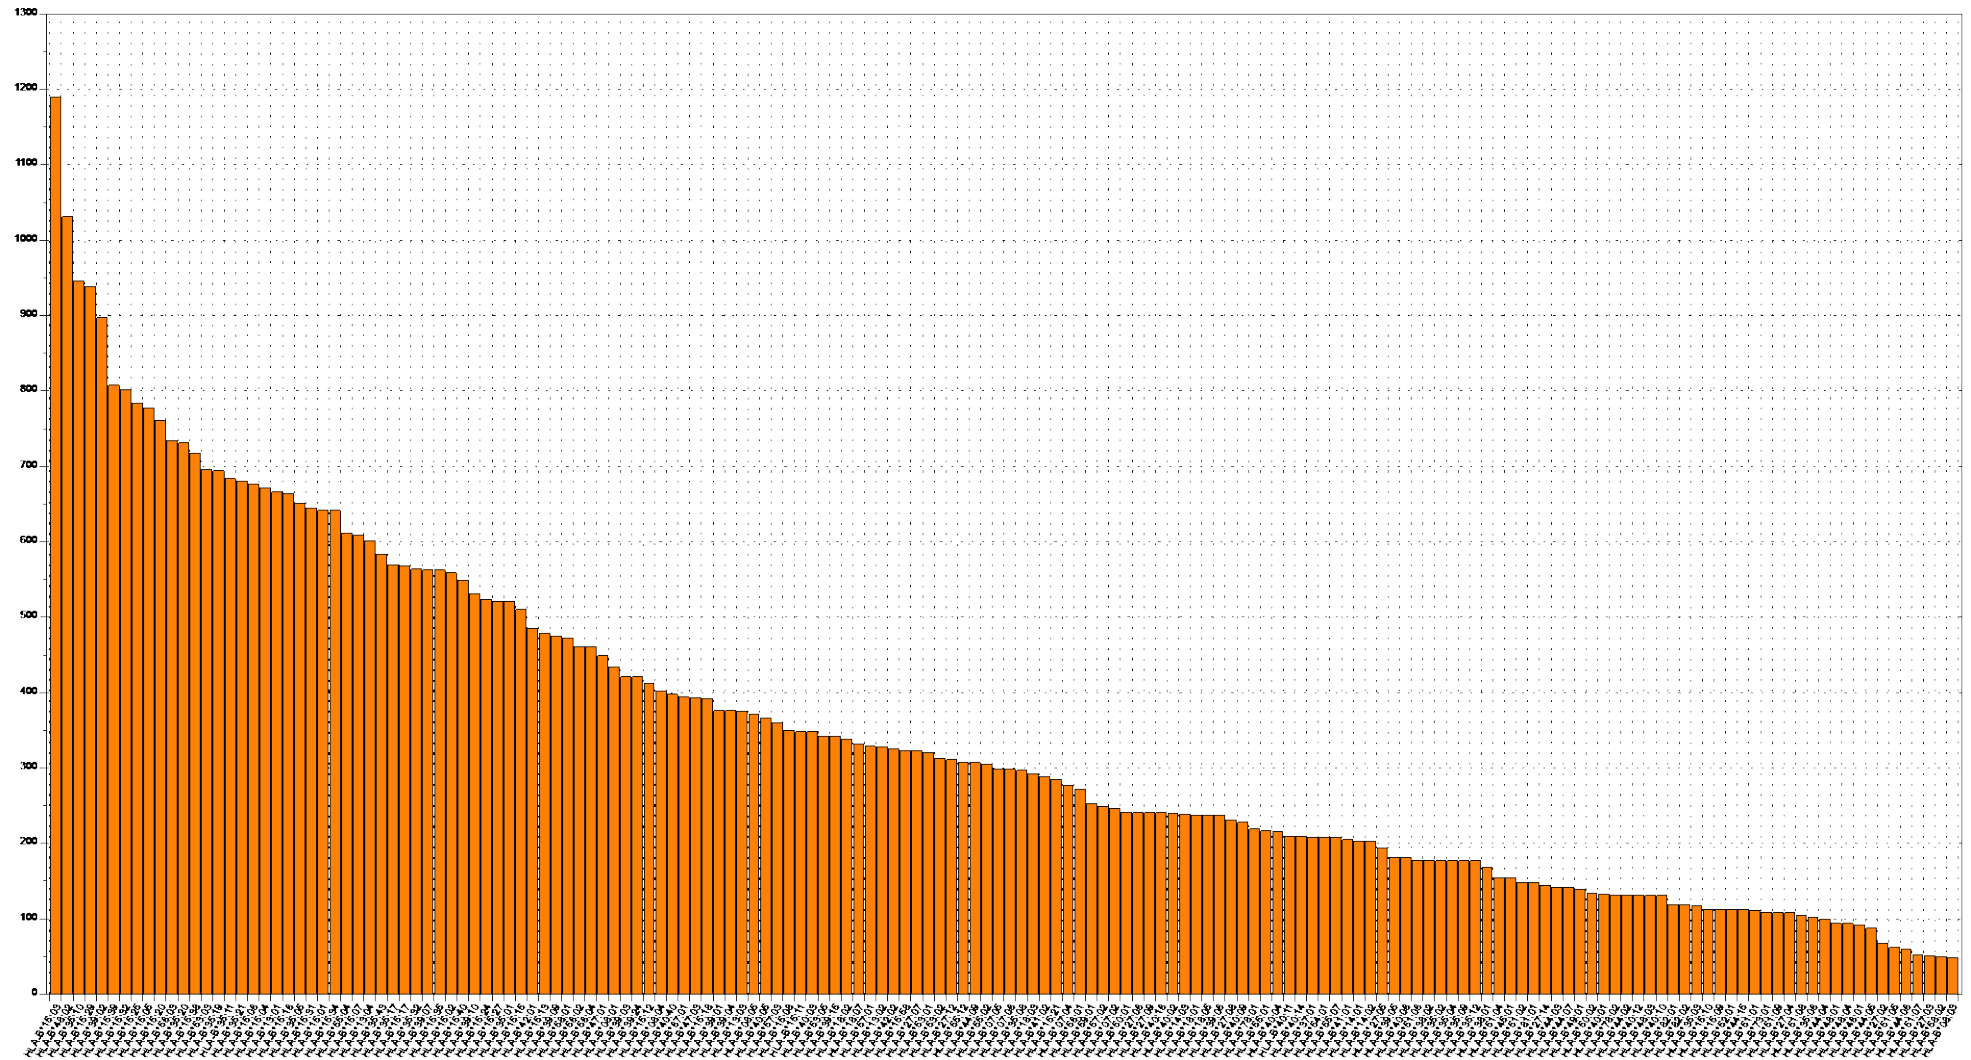

Alleles are ordered on the x-axis by their weak ( $500 \text{ nM} < IC_{50} \leq 5000 \text{ nM}$ ) binding prediction and the number of peptides presented are displayed on the y-axis.

## Total number of peptides with strong, regular and weak binding predictions for *HLA-C*

|             | <b>IC<sub>50</sub> ≤ 50 nM</b><br>Strong binders | <b>50 nM &lt; IC<sub>50</sub> ≤ 500 nM</b><br>Regular binders | <b>500 nM &lt; IC<sub>50</sub> ≤ 5000 nM</b><br>Weak binders | <b>IC<sub>50</sub> &gt; 5000 nM</b><br>Non binders |
|-------------|--------------------------------------------------|---------------------------------------------------------------|--------------------------------------------------------------|----------------------------------------------------|
| HLA-C*01:02 | 0                                                | 6                                                             | 210                                                          | 6849                                               |
| HLA-C*01:03 | 0                                                | 0                                                             | 26                                                           | 7039                                               |
| HLA-C*02:02 | 3                                                | 108                                                           | 869                                                          | 6085                                               |
| HLA-C*02:10 | 3                                                | 108                                                           | 869                                                          | 6085                                               |
| HLA-C*03:02 | 89                                               | 355                                                           | 1006                                                         | 5615                                               |
| HLA-C*03:03 | 66                                               | 230                                                           | 638                                                          | 6131                                               |
| HLA-C*03:04 | 66                                               | 230                                                           | 638                                                          | 6131                                               |
| HLA-C*03:05 | 24                                               | 194                                                           | 628                                                          | 6219                                               |
| HLA-C*03:07 | 32                                               | 227                                                           | 720                                                          | 6086                                               |
| HLA-C*04:01 | 0                                                | 3                                                             | 60                                                           | 7002                                               |
| HLA-C*04:03 | 3                                                | 19                                                            | 110                                                          | 6933                                               |
| HLA-C*04:04 | 0                                                | 1                                                             | 100                                                          | 6964                                               |
| HLA-C*04:05 | 0                                                | 3                                                             | 60                                                           | 7002                                               |
| HLA-C*04:06 | 3                                                | 18                                                            | 227                                                          | 6817                                               |
| HLA-C*04:07 | 0                                                | 3                                                             | 60                                                           | 7002                                               |
| HLA-C*05:01 | 17                                               | 44                                                            | 245                                                          | 6759                                               |
| HLA-C*06:02 | 2                                                | 37                                                            | 311                                                          | 6715                                               |
| HLA-C*06:04 | 5                                                | 70                                                            | 666                                                          | 6324                                               |
| HLA-C*06:06 | 1                                                | 70                                                            | 811                                                          | 6183                                               |
| HLA-C*07:01 | 4                                                | 39                                                            | 355                                                          | 6667                                               |
| HLA-C*07:02 | 8                                                | 100                                                           | 610                                                          | 6347                                               |
| HLA-C*07:03 | 5                                                | 117                                                           | 797                                                          | 6146                                               |
| HLA-C*07:04 | 0                                                | 0                                                             | 101                                                          | 6964                                               |
| HLA-C*07:05 | 7                                                | 71                                                            | 604                                                          | 6383                                               |
| HLA-C*07:06 | 4                                                | 39                                                            | 355                                                          | 6667                                               |
| HLA-C*07:07 | 0                                                | 13                                                            | 185                                                          | 6867                                               |
| HLA-C*07:08 | 1                                                | 25                                                            | 261                                                          | 6778                                               |
| HLA-C*07:10 | 6                                                | 90                                                            | 628                                                          | 6341                                               |
| HLA-C*07:11 | 0                                                | 0                                                             | 101                                                          | 6964                                               |
| HLA-C*07:18 | 4                                                | 39                                                            | 355                                                          | 6667                                               |
| HLA-C*08:01 | 5                                                | 55                                                            | 410                                                          | 6595                                               |
| HLA-C*08:02 | 2                                                | 28                                                            | 152                                                          | 6883                                               |
| HLA-C*08:03 | 5                                                | 55                                                            | 410                                                          | 6595                                               |
| HLA-C*08:04 | 4                                                | 63                                                            | 427                                                          | 6571                                               |
| HLA-C*12:02 | 15                                               | 204                                                           | 991                                                          | 5855                                               |
| HLA-C*12:03 | 66                                               | 432                                                           | 1155                                                         | 5412                                               |
| HLA-C*12:04 | 21                                               | 256                                                           | 1077                                                         | 5711                                               |
| HLA-C*12:05 | 19                                               | 244                                                           | 1031                                                         | 5771                                               |
| HLA-C*14:02 | 73                                               | 327                                                           | 1182                                                         | 5483                                               |
| HLA-C*14:03 | 73                                               | 327                                                           | 1182                                                         | 5483                                               |
| HLA-C*15:02 | 8                                                | 155                                                           | 624                                                          | 6278                                               |
| HLA-C*15:03 | 4                                                | 156                                                           | 662                                                          | 6243                                               |
| HLA-C*15:04 | 10                                               | 273                                                           | 1000                                                         | 5782                                               |
| HLA-C*15:05 | 5                                                | 91                                                            | 523                                                          | 6446                                               |
| HLA-C*15:06 | 19                                               | 222                                                           | 726                                                          | 6098                                               |
| HLA-C*15:07 | 7                                                | 173                                                           | 668                                                          | 6217                                               |
| HLA-C*15:08 | 8                                                | 73                                                            | 493                                                          | 6491                                               |
| HLA-C*15:13 | 8                                                | 155                                                           | 624                                                          | 6278                                               |
| HLA-C*16:01 | 56                                               | 382                                                           | 1041                                                         | 5586                                               |
| HLA-C*16:02 | 5                                                | 179                                                           | 910                                                          | 5971                                               |
| HLA-C*16:04 | 39                                               | 309                                                           | 1077                                                         | 5640                                               |
| HLA-C*17:01 | 6                                                | 96                                                            | 786                                                          | 6177                                               |
| HLA-C*17:03 | 3                                                | 48                                                            | 393                                                          | 6621                                               |
| HLA-C*18:01 | 0                                                | 0                                                             | 17                                                           | 7048                                               |
| HLA-C*18:02 | 0                                                | 0                                                             | 17                                                           | 7048                                               |

Alleles are ordered alphabetically.

## General binding prediction tendencies for HLA-C

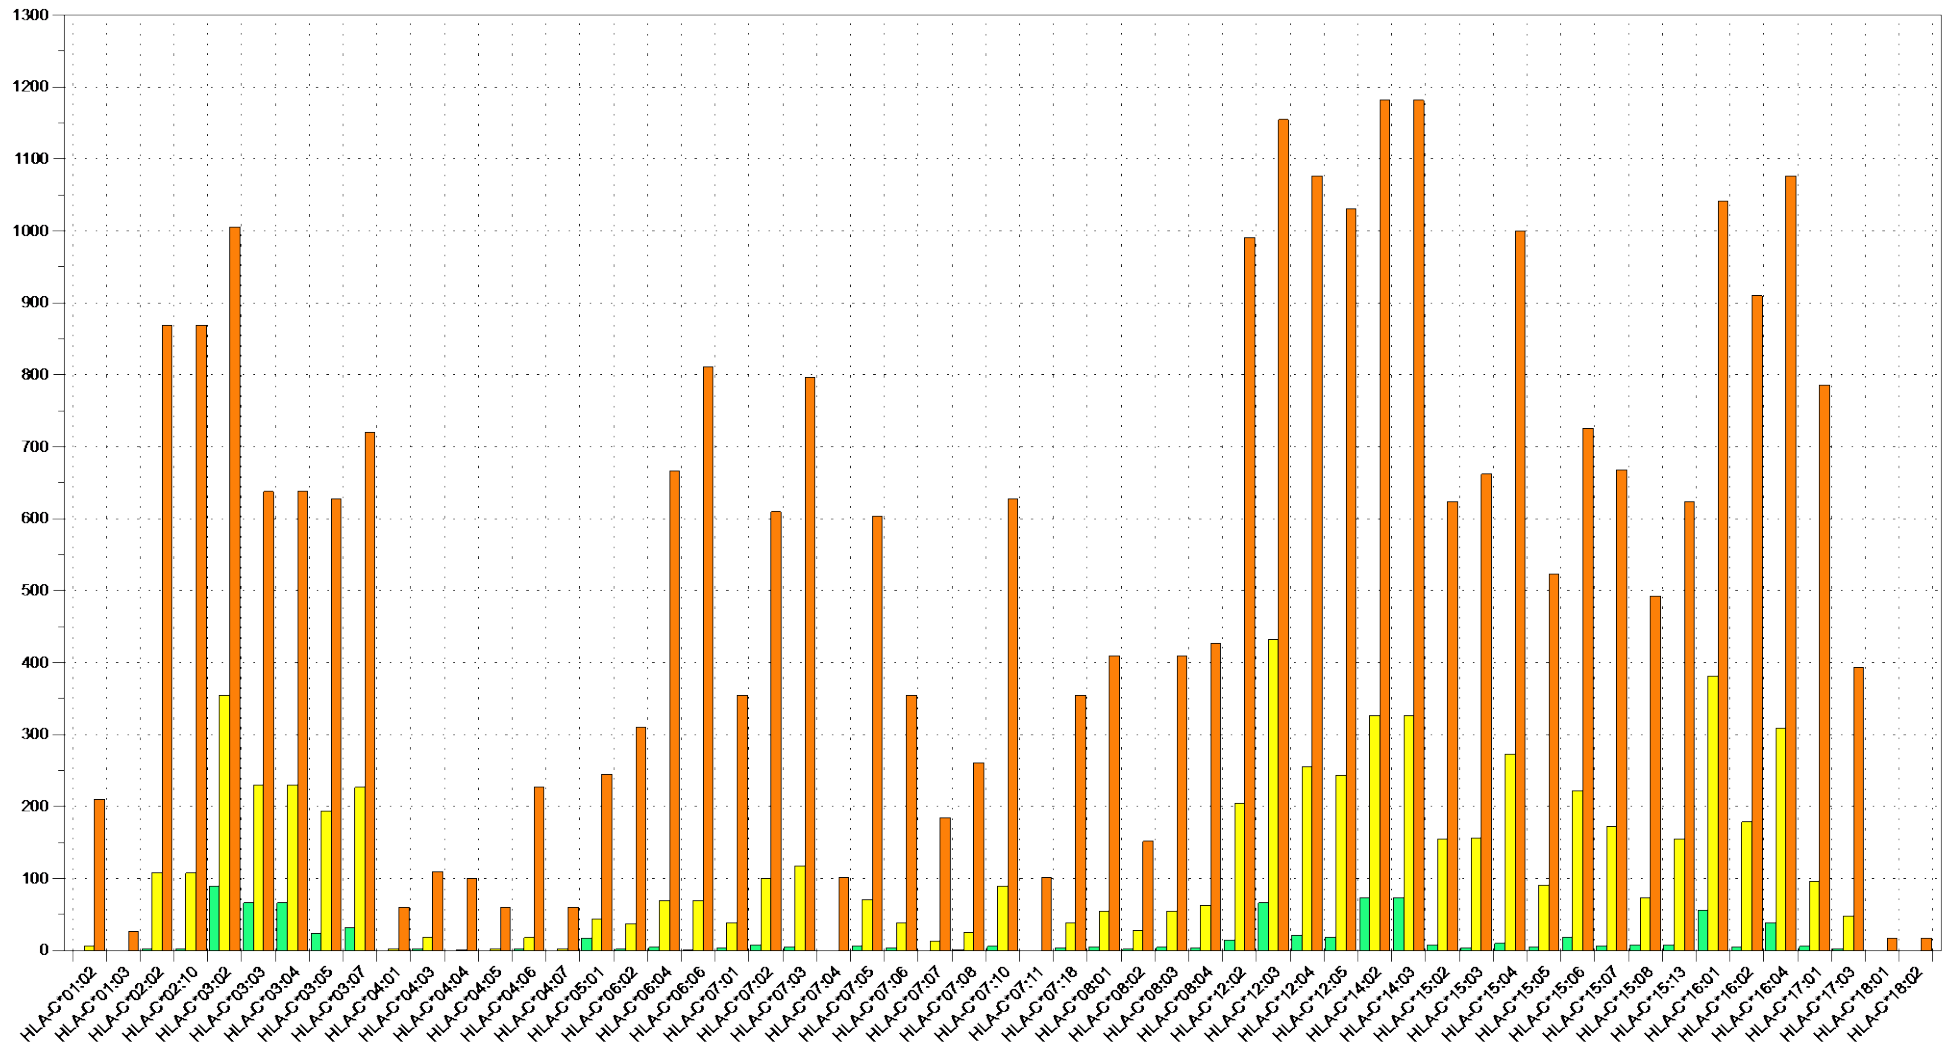

Alleles are ordered alphabetically on the x-axis, while the number of peptides binding with strong ( $IC_{50} \leq 50$  nM), regular ( $50$  nM  $< IC_{50} \leq 500$  nM) and weak ( $500$  nM  $< IC_{50} \leq 5000$  nM) binding prediction are displayed on the y-axis.



## HLA-C alleles ordered by number of presented peptides with strong binding prediction

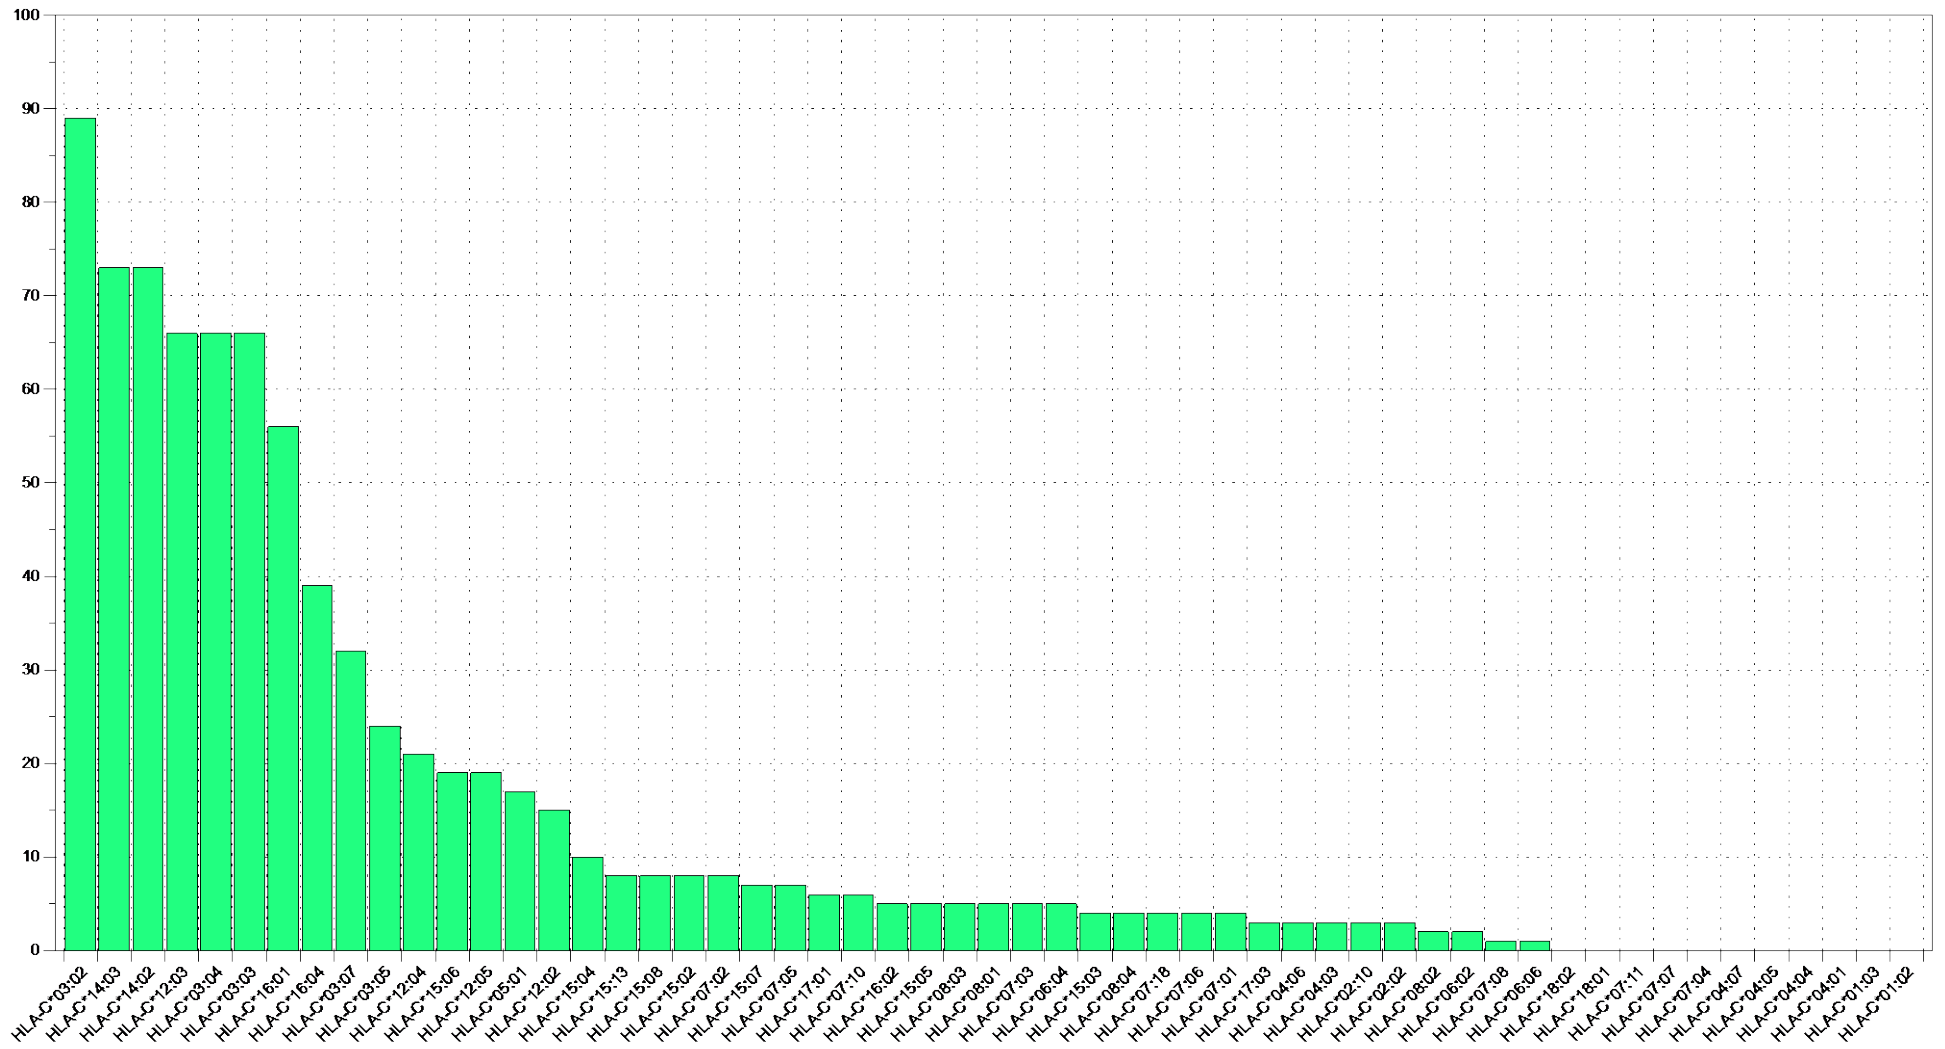

Alleles are ordered on the x-axis by their strong (IC<sub>50</sub> ≤ 50 nM) binding prediction and the number of peptides presented are displayed on the y-axis.

## HLA-C alleles ordered by number of presented peptides with regular binding prediction

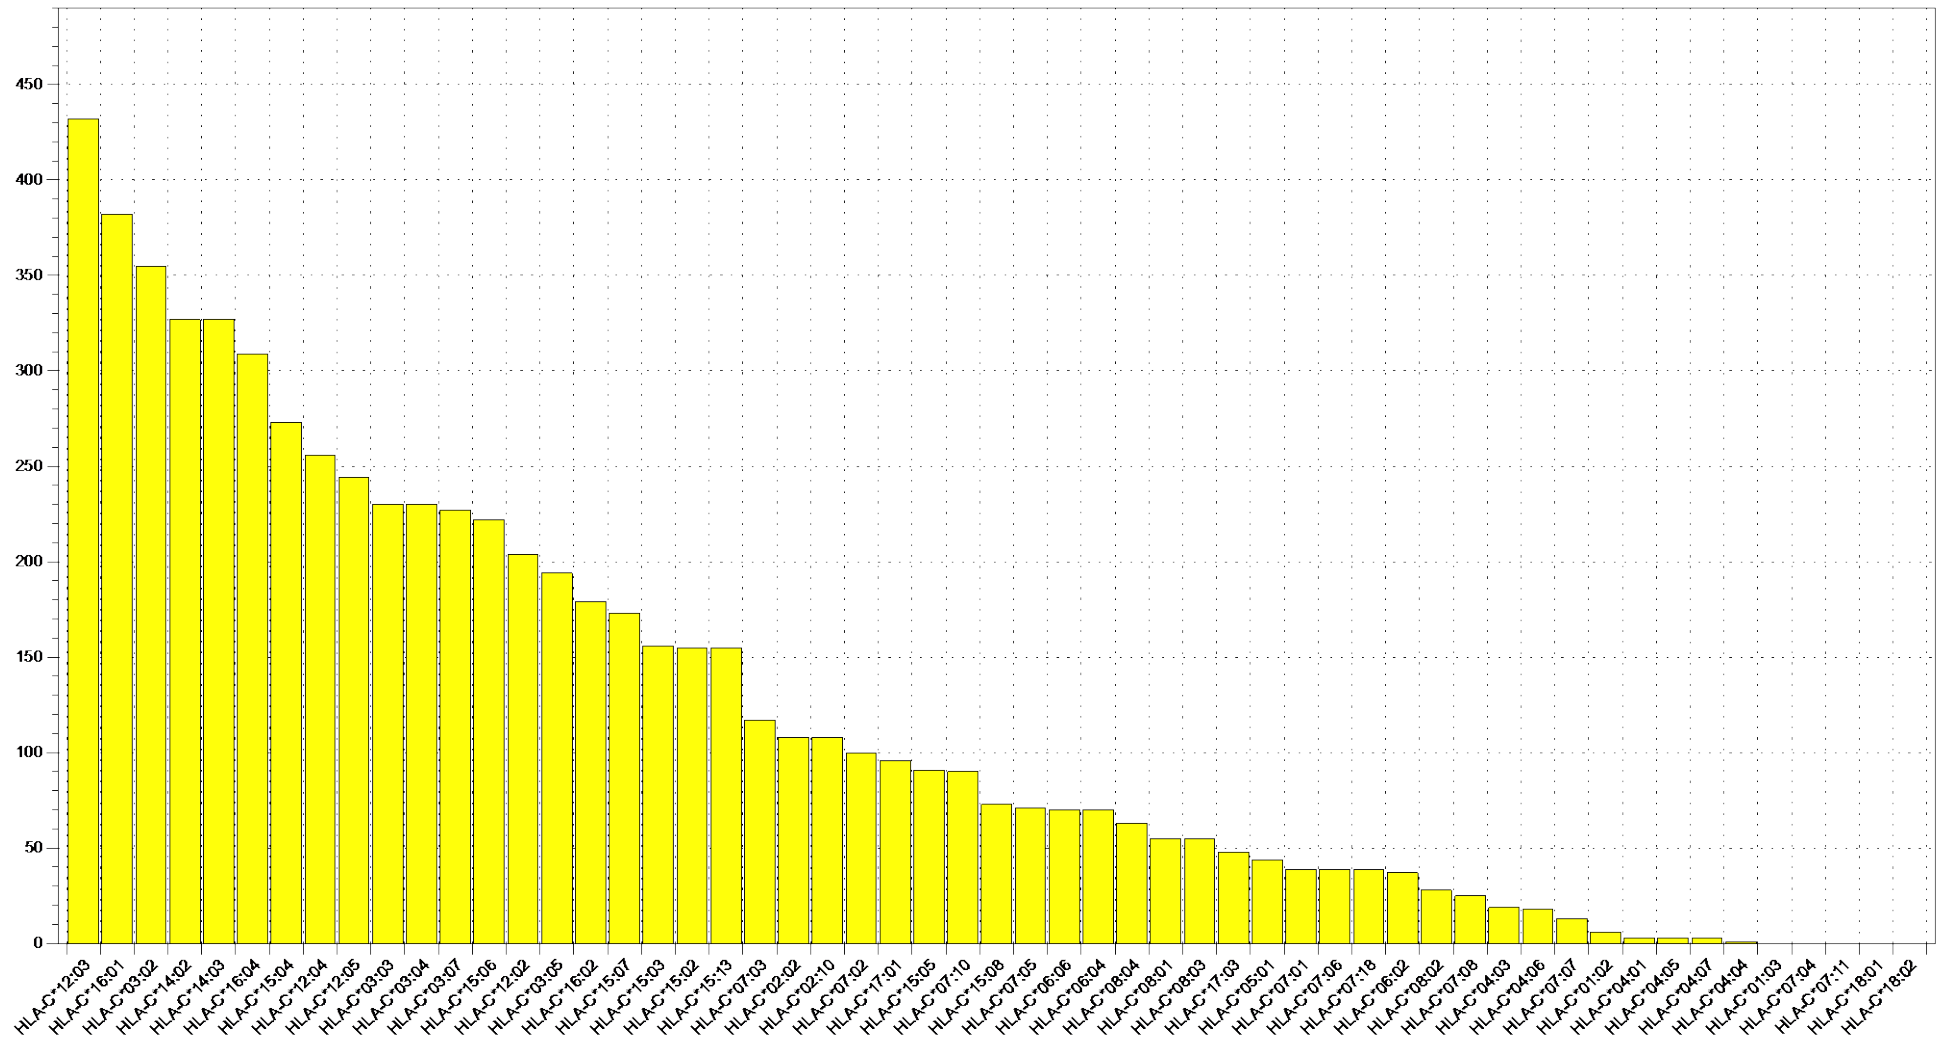

Alleles are ordered on the x-axis by their regular ( $50 \text{ nM} < IC_{50} \leq 500 \text{ nM}$ ) binding prediction and the number of peptides presented are displayed on the y-axis.

## HLA-C alleles ordered by number of presented peptides with weak binding prediction

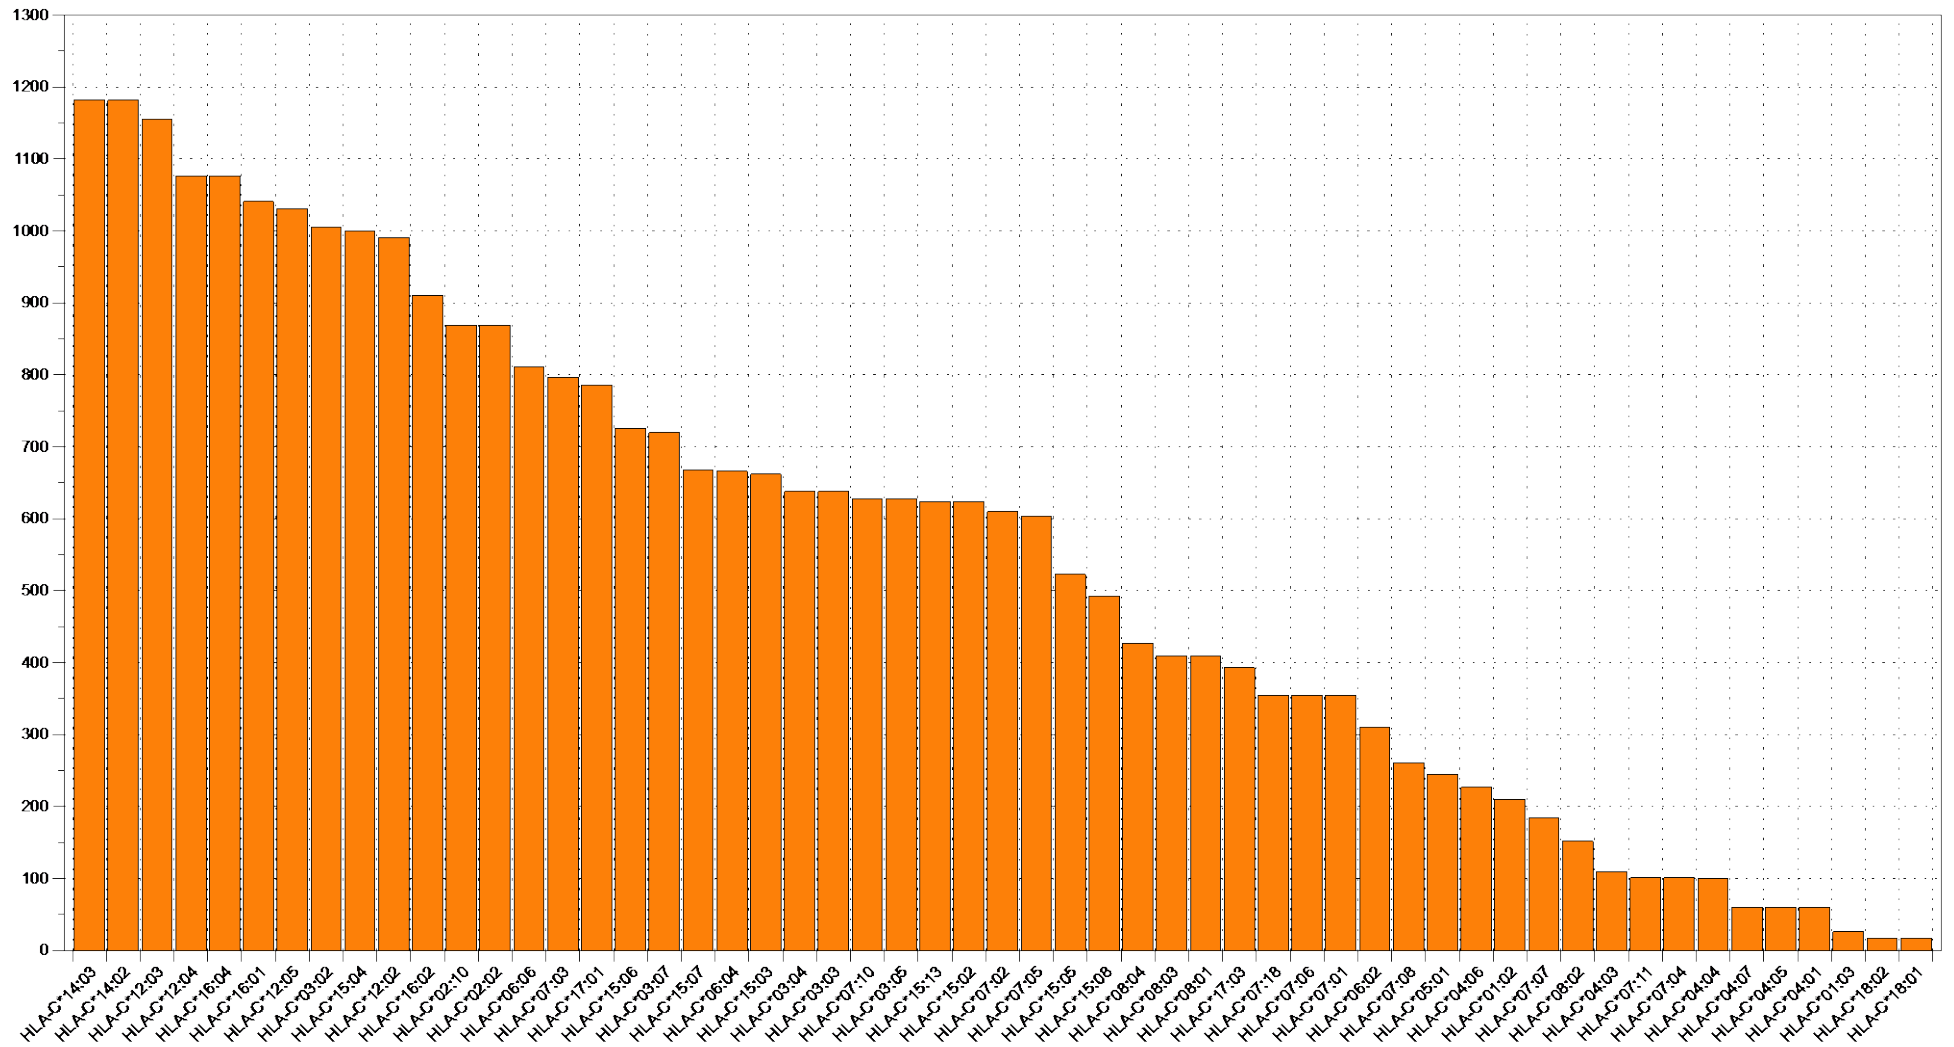

Alleles are ordered on the x-axis by their weak ( $500 \text{ nM} < \text{IC}_{50} \leq 5000 \text{ nM}$ ) binding prediction and the number of peptides presented are displayed on the y-axis.

## Total number of peptides with strong, regular and weak binding predictions for *HLA-DRB1*

|                | IC <sub>50</sub> ≤ 50 nM<br>Strong binders | 50 nM < IC <sub>50</sub> ≤ 1000 nM<br>Regular binders | 1000 nM < IC <sub>50</sub> ≤ 5000 nM<br>Weak binders | IC <sub>50</sub> > 5000 nM<br>Non binders |
|----------------|--------------------------------------------|-------------------------------------------------------|------------------------------------------------------|-------------------------------------------|
| HLA-DRB1*01:01 | 728                                        | 3855                                                  | 1727                                                 | 751                                       |
| HLA-DRB1*01:02 | 13                                         | 1849                                                  | 3124                                                 | 2075                                      |
| HLA-DRB1*01:03 | 0                                          | 547                                                   | 2310                                                 | 4204                                      |
| HLA-DRB1*01:04 | 172                                        | 3599                                                  | 2271                                                 | 1019                                      |
| HLA-DRB1*03:01 | 2                                          | 778                                                   | 2822                                                 | 3459                                      |
| HLA-DRB1*03:02 | 0                                          | 2                                                     | 202                                                  | 6857                                      |
| HLA-DRB1*03:03 | 0                                          | 37                                                    | 790                                                  | 6234                                      |
| HLA-DRB1*03:04 | 2                                          | 778                                                   | 2822                                                 | 3459                                      |
| HLA-DRB1*03:05 | 0                                          | 374                                                   | 1971                                                 | 4716                                      |
| HLA-DRB1*03:06 | 0                                          | 486                                                   | 2716                                                 | 3859                                      |
| HLA-DRB1*03:07 | 0                                          | 348                                                   | 2115                                                 | 4598                                      |
| HLA-DRB1*03:08 | 2                                          | 778                                                   | 2822                                                 | 3459                                      |
| HLA-DRB1*04:01 | 15                                         | 2273                                                  | 3209                                                 | 1564                                      |
| HLA-DRB1*04:02 | 0                                          | 1108                                                  | 3033                                                 | 2920                                      |
| HLA-DRB1*04:03 | 0                                          | 878                                                   | 3090                                                 | 3093                                      |
| HLA-DRB1*04:04 | 32                                         | 2490                                                  | 2758                                                 | 1781                                      |
| HLA-DRB1*04:05 | 6                                          | 2153                                                  | 3016                                                 | 1886                                      |
| HLA-DRB1*04:06 | 0                                          | 878                                                   | 3090                                                 | 3093                                      |
| HLA-DRB1*04:07 | 0                                          | 543                                                   | 2657                                                 | 3861                                      |
| HLA-DRB1*04:08 | 8                                          | 1893                                                  | 3161                                                 | 1999                                      |
| HLA-DRB1*04:10 | 12                                         | 2242                                                  | 2866                                                 | 1941                                      |
| HLA-DRB1*04:11 | 0                                          | 939                                                   | 3226                                                 | 2896                                      |
| HLA-DRB1*04:13 | 20                                         | 2911                                                  | 2829                                                 | 1301                                      |
| HLA-DRB1*04:15 | 0                                          | 287                                                   | 1789                                                 | 4985                                      |
| HLA-DRB1*04:17 | 0                                          | 686                                                   | 3027                                                 | 3348                                      |
| HLA-DRB1*07:01 | 86                                         | 2737                                                  | 2622                                                 | 1616                                      |
| HLA-DRB1*08:01 | 0                                          | 1255                                                  | 3000                                                 | 2806                                      |
| HLA-DRB1*08:02 | 0                                          | 981                                                   | 3229                                                 | 2851                                      |
| HLA-DRB1*08:03 | 0                                          | 321                                                   | 2898                                                 | 3842                                      |
| HLA-DRB1*08:04 | 0                                          | 1065                                                  | 2903                                                 | 3093                                      |
| HLA-DRB1*08:05 | 12                                         | 1261                                                  | 2780                                                 | 3008                                      |
| HLA-DRB1*08:06 | 0                                          | 871                                                   | 2809                                                 | 3381                                      |
| HLA-DRB1*08:07 | 0                                          | 2121                                                  | 3195                                                 | 1745                                      |
| HLA-DRB1*08:09 | 0                                          | 981                                                   | 3229                                                 | 2851                                      |
| HLA-DRB1*08:10 | 0                                          | 898                                                   | 3114                                                 | 3049                                      |
| HLA-DRB1*08:11 | 0                                          | 2074                                                  | 3177                                                 | 1810                                      |
| HLA-DRB1*08:12 | 0                                          | 218                                                   | 2747                                                 | 4096                                      |
| HLA-DRB1*09:01 | 19                                         | 2779                                                  | 2912                                                 | 1351                                      |
| HLA-DRB1*10:01 | 360                                        | 3758                                                  | 2081                                                 | 862                                       |
| HLA-DRB1*11:01 | 65                                         | 1602                                                  | 2513                                                 | 2881                                      |
| HLA-DRB1*11:02 | 151                                        | 2850                                                  | 2443                                                 | 1617                                      |
| HLA-DRB1*11:03 | 60                                         | 1784                                                  | 3051                                                 | 2166                                      |
| HLA-DRB1*11:04 | 31                                         | 1192                                                  | 2712                                                 | 3126                                      |
| HLA-DRB1*11:05 | 17                                         | 1715                                                  | 2884                                                 | 2445                                      |
| HLA-DRB1*11:06 | 2                                          | 595                                                   | 2272                                                 | 4192                                      |
| HLA-DRB1*11:08 | 14                                         | 2708                                                  | 2837                                                 | 1502                                      |
| HLA-DRB1*11:09 | 65                                         | 1602                                                  | 2513                                                 | 2881                                      |
| HLA-DRB1*11:10 | 65                                         | 1602                                                  | 2513                                                 | 2881                                      |
| HLA-DRB1*11:11 | 43                                         | 1996                                                  | 2788                                                 | 2234                                      |
| HLA-DRB1*11:12 | 65                                         | 1602                                                  | 2513                                                 | 2881                                      |
| HLA-DRB1*11:14 | 97                                         | 2142                                                  | 2754                                                 | 2068                                      |
| HLA-DRB1*11:15 | 65                                         | 1602                                                  | 2513                                                 | 2881                                      |
| HLA-DRB1*11:19 | 5                                          | 1476                                                  | 3063                                                 | 2517                                      |
| HLA-DRB1*11:28 | 65                                         | 1602                                                  | 2513                                                 | 2881                                      |
| HLA-DRB1*12:01 | 0                                          | 836                                                   | 2626                                                 | 3599                                      |
| HLA-DRB1*12:02 | 0                                          | 296                                                   | 2052                                                 | 4713                                      |
| HLA-DRB1*12:03 | 6                                          | 1515                                                  | 2867                                                 | 2673                                      |
| HLA-DRB1*13:01 | 151                                        | 2850                                                  | 2443                                                 | 1617                                      |
| HLA-DRB1*13:02 | 97                                         | 2142                                                  | 2754                                                 | 2068                                      |
| HLA-DRB1*13:03 | 0                                          | 1199                                                  | 3439                                                 | 2423                                      |
| HLA-DRB1*13:04 | 80                                         | 2503                                                  | 2734                                                 | 1744                                      |
| HLA-DRB1*13:05 | 65                                         | 1602                                                  | 2513                                                 | 2881                                      |

|                | <b>IC<sub>50</sub> ≤ 50 nM</b><br><b>Strong binders</b> | <b>50 nM &lt; IC<sub>50</sub> ≤ 1000 nM</b><br><b>Regular binders</b> | <b>1000 nM &lt; IC<sub>50</sub> ≤ 5000 nM</b><br><b>Weak binders</b> | <b>IC<sub>50</sub> &gt; 5000 nM</b><br><b>Non binders</b> |
|----------------|---------------------------------------------------------|-----------------------------------------------------------------------|----------------------------------------------------------------------|-----------------------------------------------------------|
| HLA-DRB1*13:06 | 31                                                      | 1904                                                                  | 2814                                                                 | 2312                                                      |
| HLA-DRB1*13:07 | 23                                                      | 1218                                                                  | 2585                                                                 | 3235                                                      |
| HLA-DRB1*13:08 | 61                                                      | 2583                                                                  | 2694                                                                 | 1723                                                      |
| HLA-DRB1*13:10 | 0                                                       | 678                                                                   | 3126                                                                 | 3257                                                      |
| HLA-DRB1*13:11 | 31                                                      | 1192                                                                  | 2712                                                                 | 3126                                                      |
| HLA-DRB1*13:12 | 0                                                       | 1284                                                                  | 3261                                                                 | 2516                                                      |
| HLA-DRB1*13:22 | 151                                                     | 2850                                                                  | 2443                                                                 | 1617                                                      |
| HLA-DRB1*14:01 | 0                                                       | 2700                                                                  | 3231                                                                 | 1130                                                      |
| HLA-DRB1*14:02 | 0                                                       | 1449                                                                  | 3540                                                                 | 2072                                                      |
| HLA-DRB1*14:03 | 0                                                       | 501                                                                   | 2955                                                                 | 3605                                                      |
| HLA-DRB1*14:04 | 0                                                       | 2168                                                                  | 3643                                                                 | 1250                                                      |
| HLA-DRB1*14:05 | 0                                                       | 1386                                                                  | 3596                                                                 | 2079                                                      |
| HLA-DRB1*14:06 | 4                                                       | 2394                                                                  | 3145                                                                 | 1518                                                      |
| HLA-DRB1*14:07 | 0                                                       | 1334                                                                  | 3916                                                                 | 1811                                                      |
| HLA-DRB1*14:08 | 0                                                       | 1386                                                                  | 3596                                                                 | 2079                                                      |
| HLA-DRB1*14:09 | 5                                                       | 2561                                                                  | 3290                                                                 | 1205                                                      |
| HLA-DRB1*14:10 | 0                                                       | 1281                                                                  | 3293                                                                 | 2487                                                      |
| HLA-DRB1*14:12 | 0                                                       | 1061                                                                  | 3233                                                                 | 2767                                                      |
| HLA-DRB1*14:13 | 0                                                       | 1456                                                                  | 3636                                                                 | 1969                                                      |
| HLA-DRB1*14:14 | 0                                                       | 620                                                                   | 3350                                                                 | 3091                                                      |
| HLA-DRB1*14:18 | 0                                                       | 605                                                                   | 3389                                                                 | 3067                                                      |
| HLA-DRB1*14:54 | 0                                                       | 2700                                                                  | 3231                                                                 | 1130                                                      |
| HLA-DRB1*15:01 | 22                                                      | 1988                                                                  | 2604                                                                 | 2447                                                      |
| HLA-DRB1*15:02 | 0                                                       | 1344                                                                  | 2960                                                                 | 2757                                                      |
| HLA-DRB1*15:03 | 0                                                       | 761                                                                   | 2478                                                                 | 3822                                                      |
| HLA-DRB1*15:04 | 19                                                      | 1194                                                                  | 2780                                                                 | 3068                                                      |
| HLA-DRB1*15:06 | 22                                                      | 1988                                                                  | 2604                                                                 | 2447                                                      |
| HLA-DRB1*15:11 | 0                                                       | 1140                                                                  | 2994                                                                 | 2927                                                      |
| HLA-DRB1*16:01 | 10                                                      | 1032                                                                  | 2722                                                                 | 3297                                                      |
| HLA-DRB1*16:02 | 14                                                      | 2267                                                                  | 3053                                                                 | 1727                                                      |
| HLA-DRB1*16:03 | 10                                                      | 1032                                                                  | 2722                                                                 | 3297                                                      |
| HLA-DRB1*16:05 | 0                                                       | 1262                                                                  | 2976                                                                 | 2823                                                      |

Alleles are ordered alphabetically.

## General binding prediction tendencies for *HLA-DRB1*

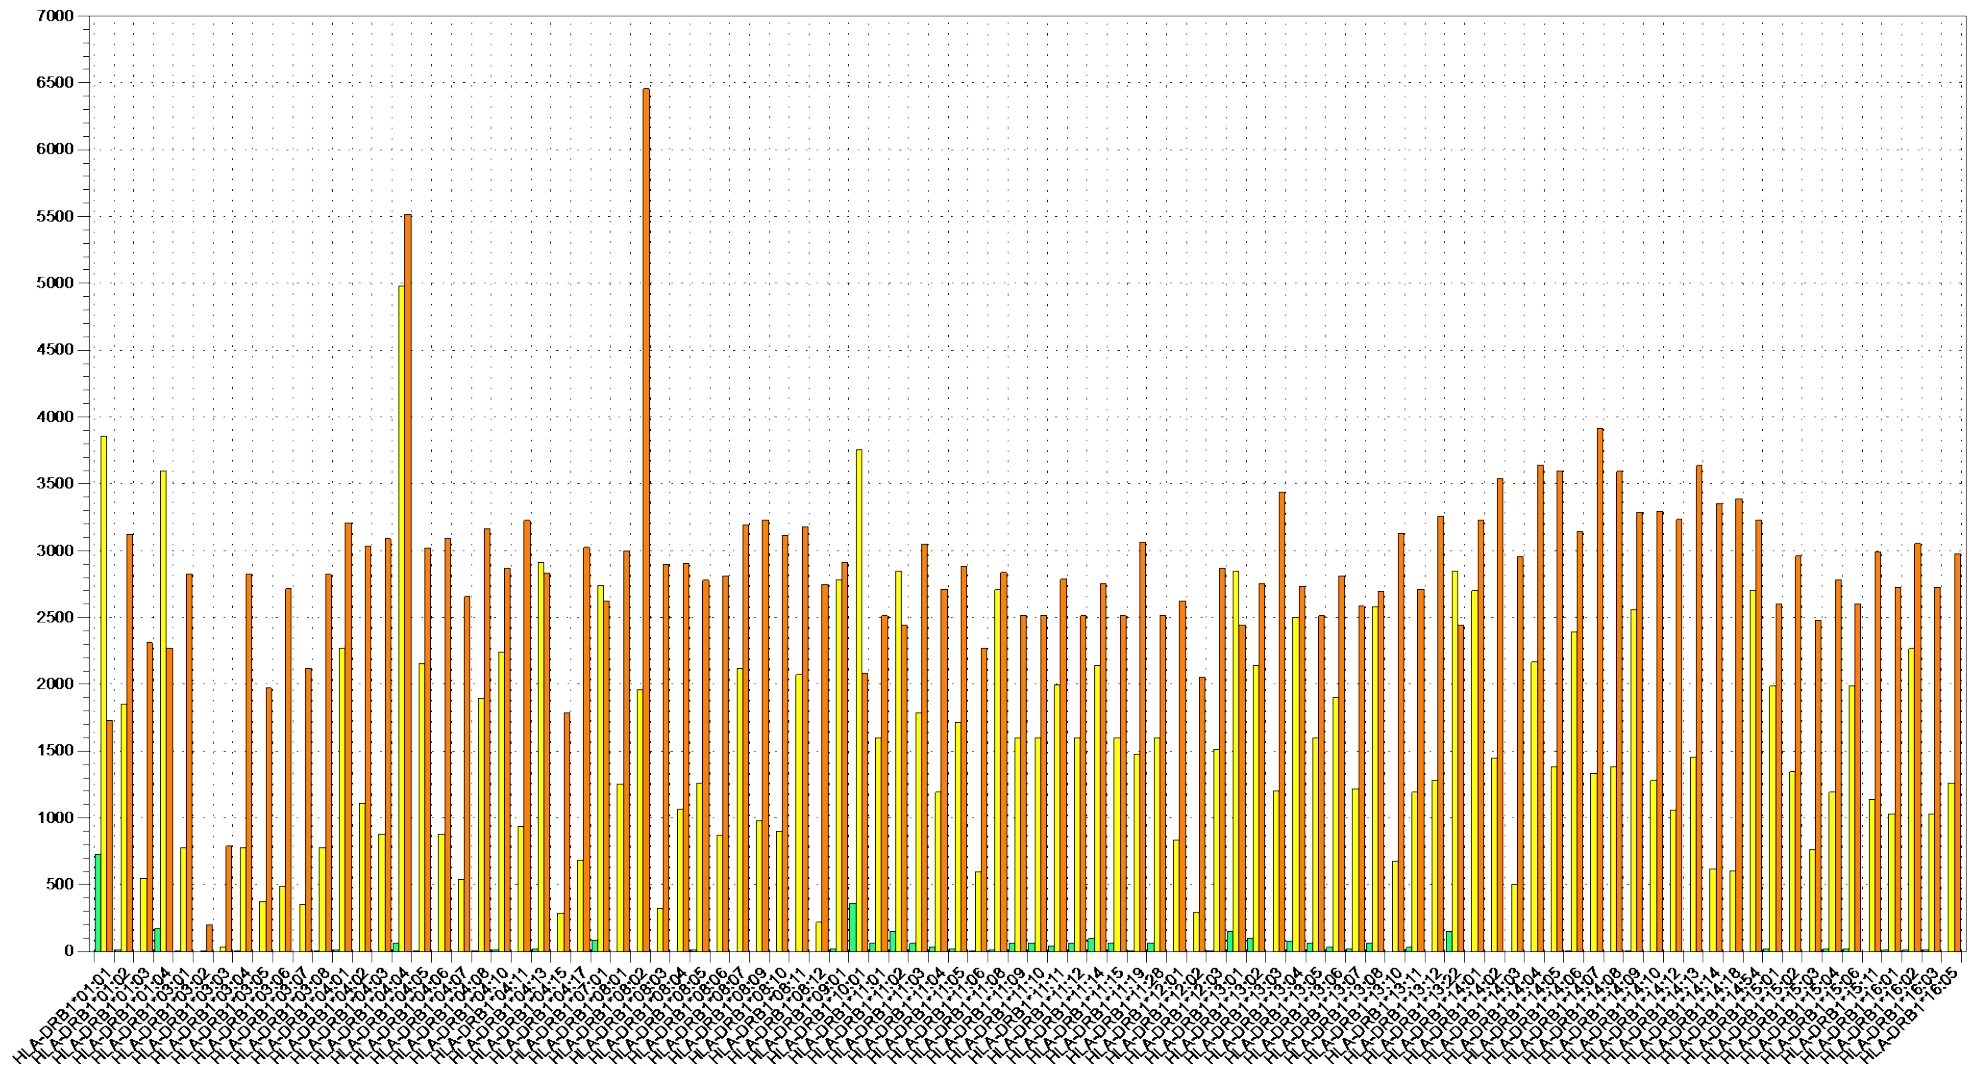

Alleles are ordered alphabetically on the x-axis, while the number of peptides binding with strong ( $IC_{50} \leq 50$  nM), regular ( $50$  nM  $< IC_{50} \leq 1000$  nM) and weak ( $1000$  nM  $< IC_{50} \leq 5000$  nM) binding prediction are displayed on the y-axis.



## HLA-DRB1 alleles ordered by number of presented peptides with regular binding prediction

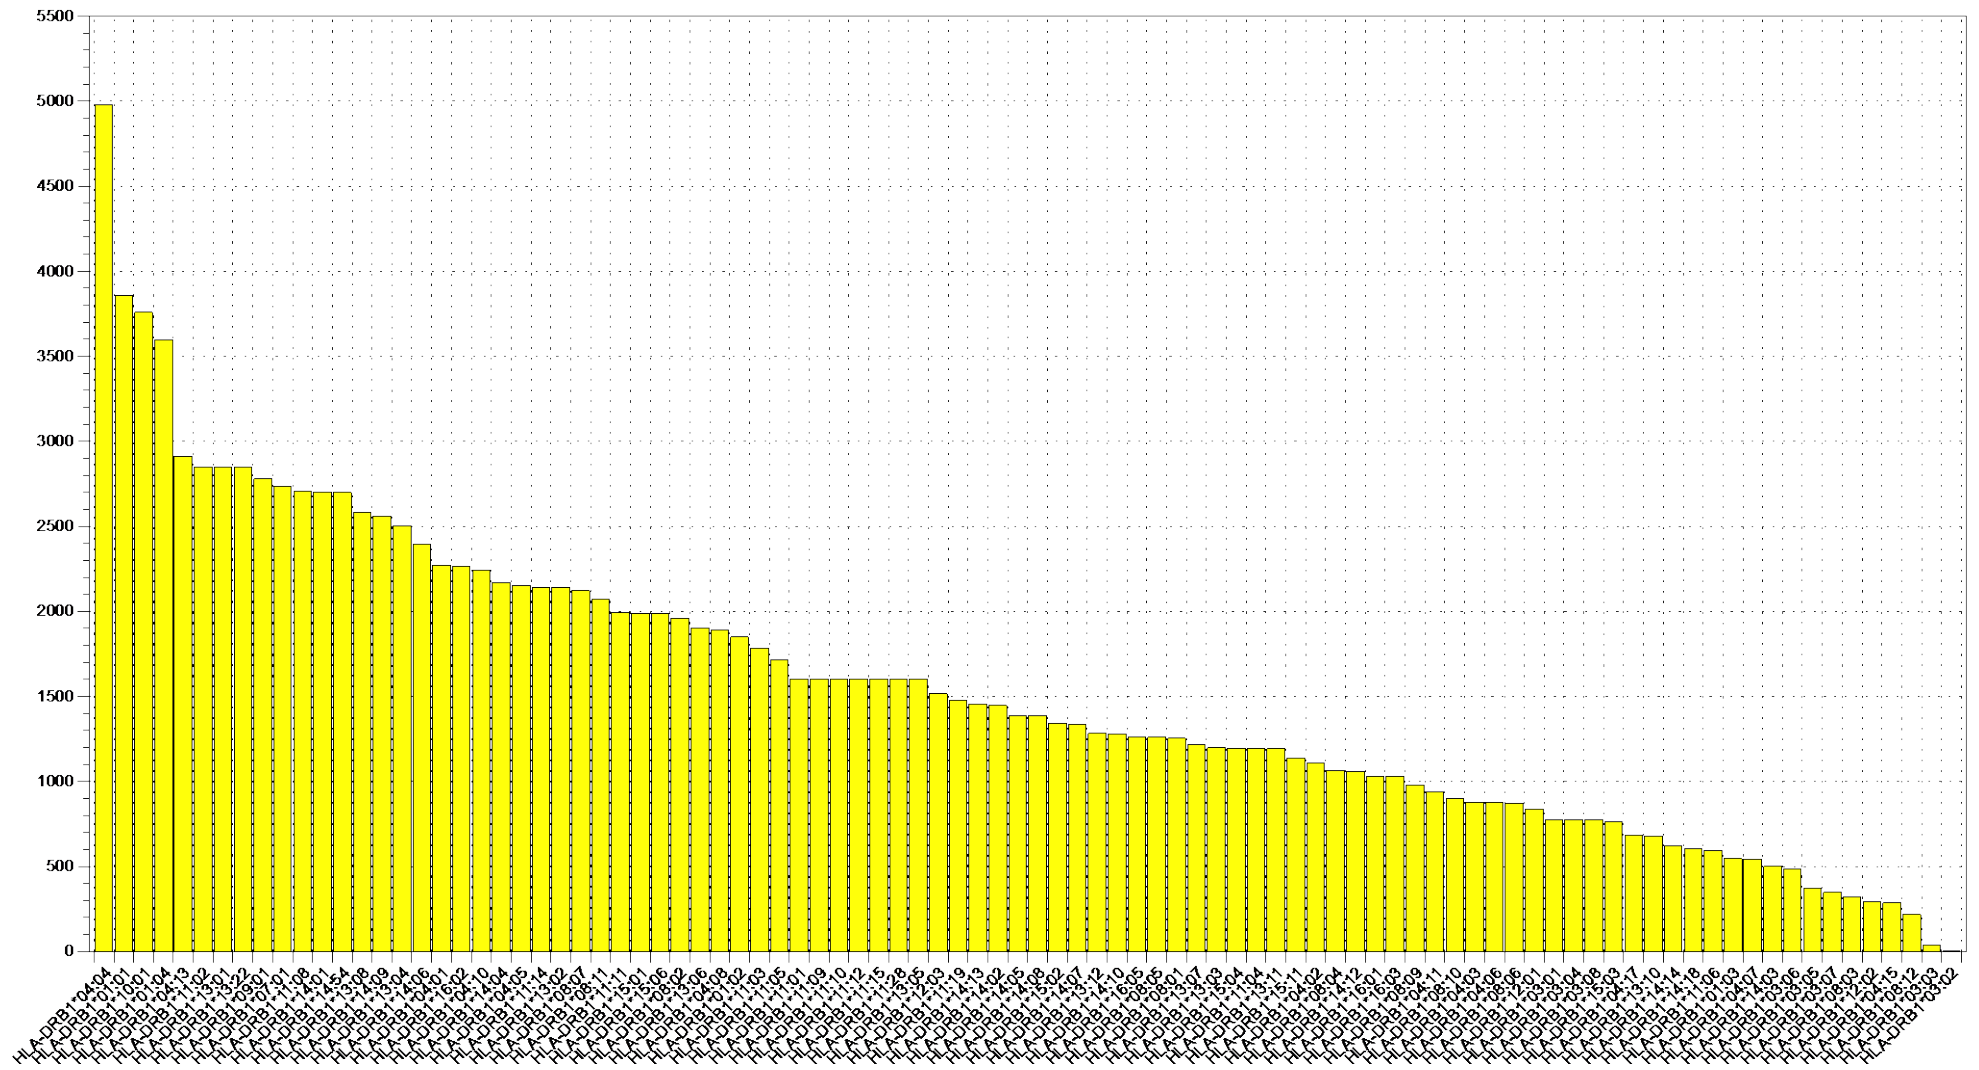

Alleles are ordered on the x-axis by their regular ( $50 \text{ nM} < IC_{50} \leq 1000 \text{ nM}$ ) binding prediction and the number of peptides presented are displayed on the y-axis.



## HLA-DRB1 alleles ordered by number of presented peptides with weak binding prediction

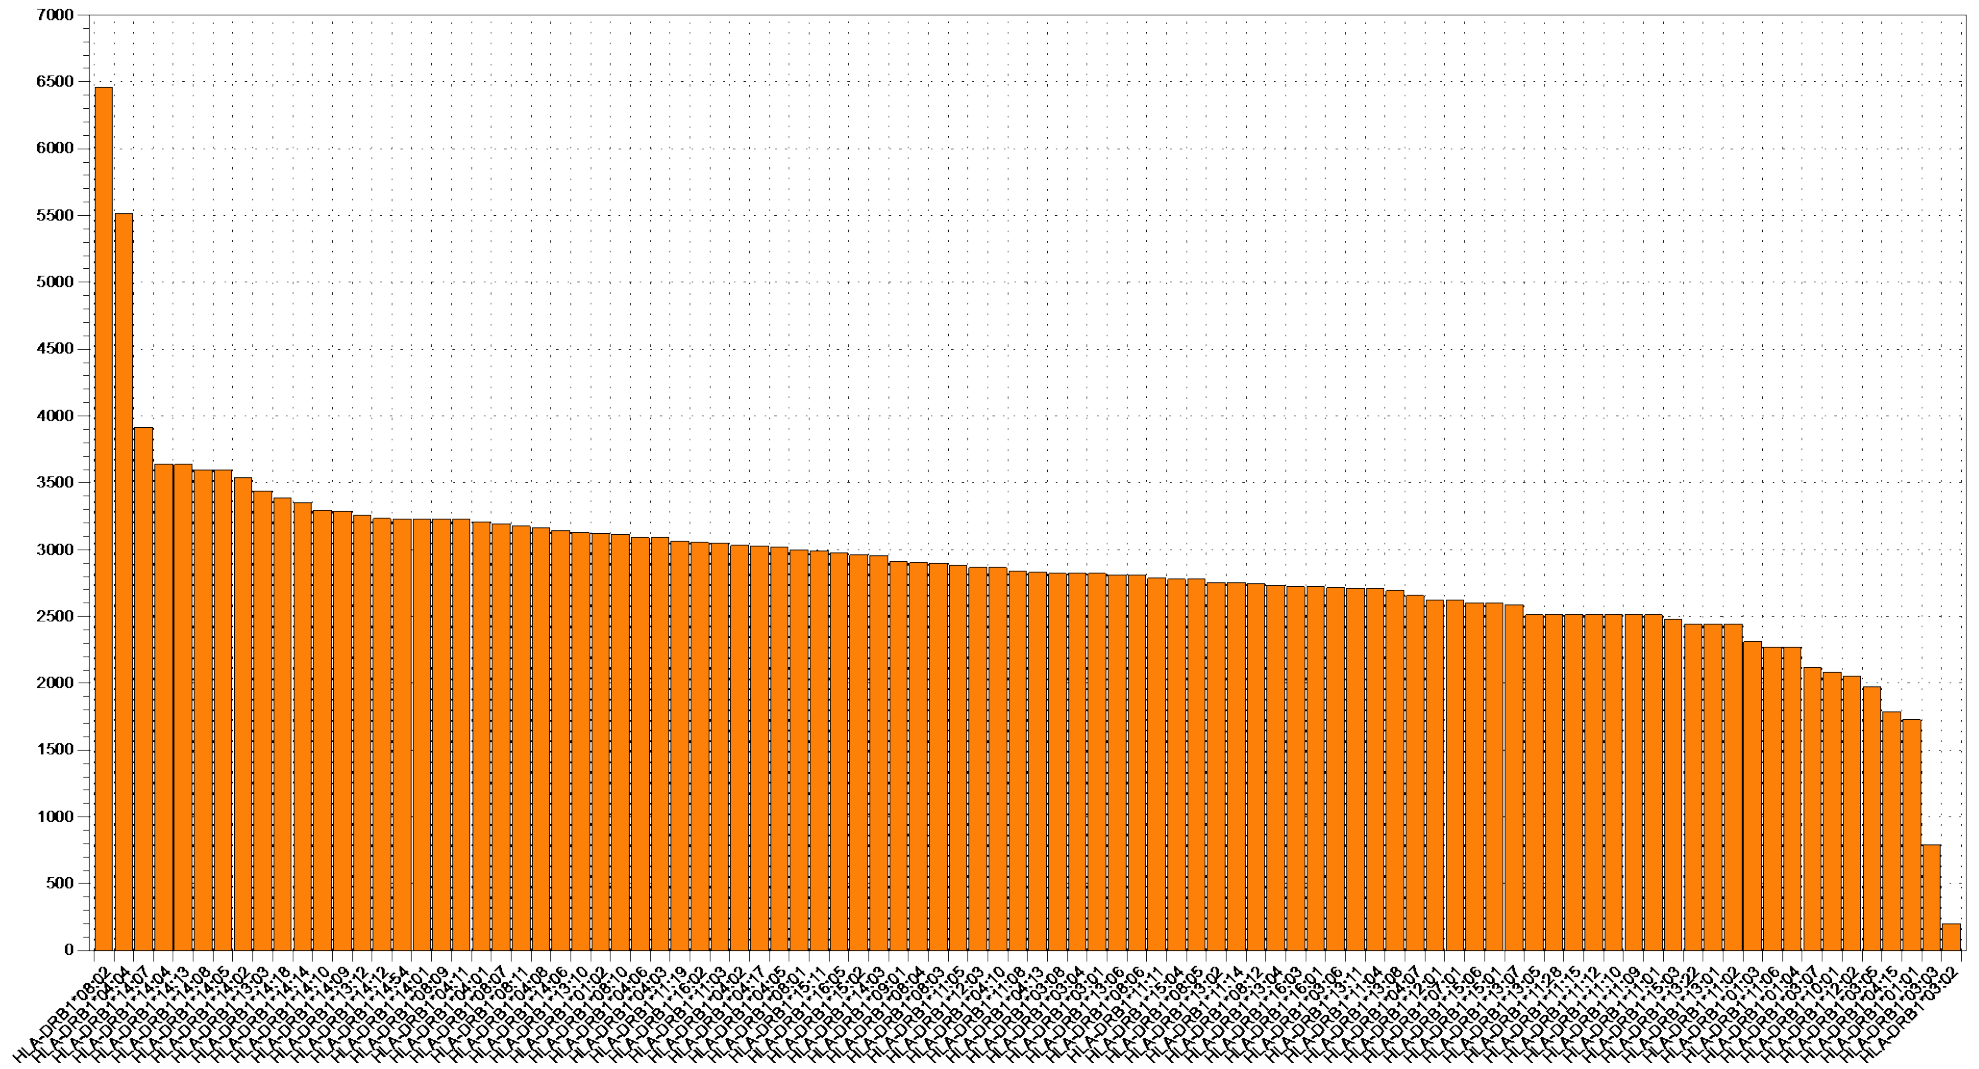

Alleles are ordered on the x-axis by their weak ( $1000 \text{ nM} < \text{IC}_{50} \leq 5000 \text{ nM}$ ) binding prediction and the number of peptides presented are displayed on the y-axis.

**Total number of peptides with strong, regular and weak binding predictions for *HLA-DQA1/-DQB1***

|                           | <b>IC<sub>50</sub> ≤ 50 nM<br/>Strong binders</b> | <b>50 nM &lt; IC<sub>50</sub> ≤ 1000 nM<br/>Regular binders</b> | <b>1000 nM &lt; IC<sub>50</sub> ≤ 5000 nM<br/>Weak binders</b> | <b>IC<sub>50</sub> &gt; 5000 nM<br/>Non binders</b> |
|---------------------------|---------------------------------------------------|-----------------------------------------------------------------|----------------------------------------------------------------|-----------------------------------------------------|
| HLA-DQA1*02:01/DQB1*02:01 | 0                                                 | 855                                                             | 2022                                                           | 4184                                                |
| HLA-DQA1*02:01/DQB1*02:02 | 0                                                 | 125                                                             | 2022                                                           | 4914                                                |
| HLA-DQA1*05:01/DQB1*02:01 | 0                                                 | 258                                                             | 3910                                                           | 2893                                                |
| HLA-DQA1*05:01/DQB1*02:03 | 0                                                 | 125                                                             | 3933                                                           | 3003                                                |
| HLA-DQA1*05:01/DQB1*03:01 | 0                                                 | 811                                                             | 3156                                                           | 3094                                                |
| HLA-DQA1*03:01/DQB1*03:02 | 4                                                 | 1256                                                            | 2866                                                           | 2935                                                |
| HLA-DQA1*02:01/DQB1*03:03 | 0                                                 | 151                                                             | 3254                                                           | 3656                                                |
| HLA-DQA1*03:01/DQB1*03:03 | 0                                                 | 1432                                                            | 3083                                                           | 2546                                                |
| HLA-DQA1*03:02/DQB1*03:03 | 0                                                 | 308                                                             | 3083                                                           | 3670                                                |
| HLA-DQA1*03:01/DQB1*03:04 | 0                                                 | 308                                                             | 4052                                                           | 2701                                                |
| HLA-DQA1*03:01/DQB1*03:05 | 0                                                 | 526                                                             | 4218                                                           | 2317                                                |
| HLA-DQA1*05:01/DQB1*03:05 | 0                                                 | 215                                                             | 4497                                                           | 2349                                                |
| HLA-DQA1*03:01/DQB1*03:07 | 0                                                 | 1567                                                            | 2866                                                           | 2628                                                |
| HLA-DQA1*01:03/DQB1*03:19 | 0                                                 | 151                                                             | 3613                                                           | 3297                                                |
| HLA-DQA1*01:05/DQB1*03:19 | 0                                                 | 1539                                                            | 2897                                                           | 2625                                                |
| HLA-DQA1*05:05/DQB1*03:19 | 0                                                 | 232                                                             | 3156                                                           | 3673                                                |
| HLA-DQA1*03:01/DQB1*04:01 | 4                                                 | 1256                                                            | 2058                                                           | 3743                                                |
| HLA-DQA1*03:03/DQB1*04:01 | 0                                                 | 95                                                              | 2058                                                           | 4908                                                |
| HLA-DQA1*04:01/DQB1*04:01 | 0                                                 | 95                                                              | 3041                                                           | 3925                                                |
| HLA-DQA1*04:01/DQB1*04:02 | 0                                                 | 186                                                             | 3041                                                           | 3834                                                |
| HLA-DQA1*01:01/DQB1*05:01 | 0                                                 | 186                                                             | 1787                                                           | 5088                                                |
| HLA-DQA1*01:02/DQB1*05:02 | 0                                                 | 224                                                             | 2034                                                           | 4803                                                |
| HLA-DQA1*01:01/DQB1*05:03 | 0                                                 | 128                                                             | 1261                                                           | 5672                                                |
| HLA-DQA1*01:03/DQB1*06:01 | 0                                                 | 25                                                              | 3601                                                           | 3435                                                |
| HLA-DQA1*01:02/DQB1*06:02 | 0                                                 | 570                                                             | 3380                                                           | 3111                                                |
| HLA-DQA1*01:03/DQB1*06:02 | 0                                                 | 686                                                             | 3450                                                           | 2925                                                |
| HLA-DQA1*01:02/DQB1*06:03 | 0                                                 | 881                                                             | 1050                                                           | 5130                                                |
| HLA-DQA1*01:03/DQB1*06:03 | 0                                                 | 3                                                               | 1092                                                           | 5966                                                |
| HLA-DQA1*01:02/DQB1*06:08 | 0                                                 | 46                                                              | 1797                                                           | 5218                                                |
| HLA-DQA1*01:02/DQB1*06:09 | 0                                                 | 41                                                              | 53                                                             | 6967                                                |
| HLA-DQA1*01:02/DQB1*06:10 | 0                                                 | 41                                                              | 2508                                                           | 4512                                                |
| HLA-DQA1*01:02/DQB1*06:11 | 0                                                 | 419                                                             | 2906                                                           | 3736                                                |
| HLA-DQA1*01:03/DQB1*06:11 | 0                                                 | 696                                                             | 3066                                                           | 3299                                                |
| HLA-DQA1*01:02/DQB1*06:14 | 0                                                 | 7                                                               | 1455                                                           | 5599                                                |

Allele combinations are ordered alphabetically.

## General binding prediction tendencies for *HLA-DQA1/DQB1*

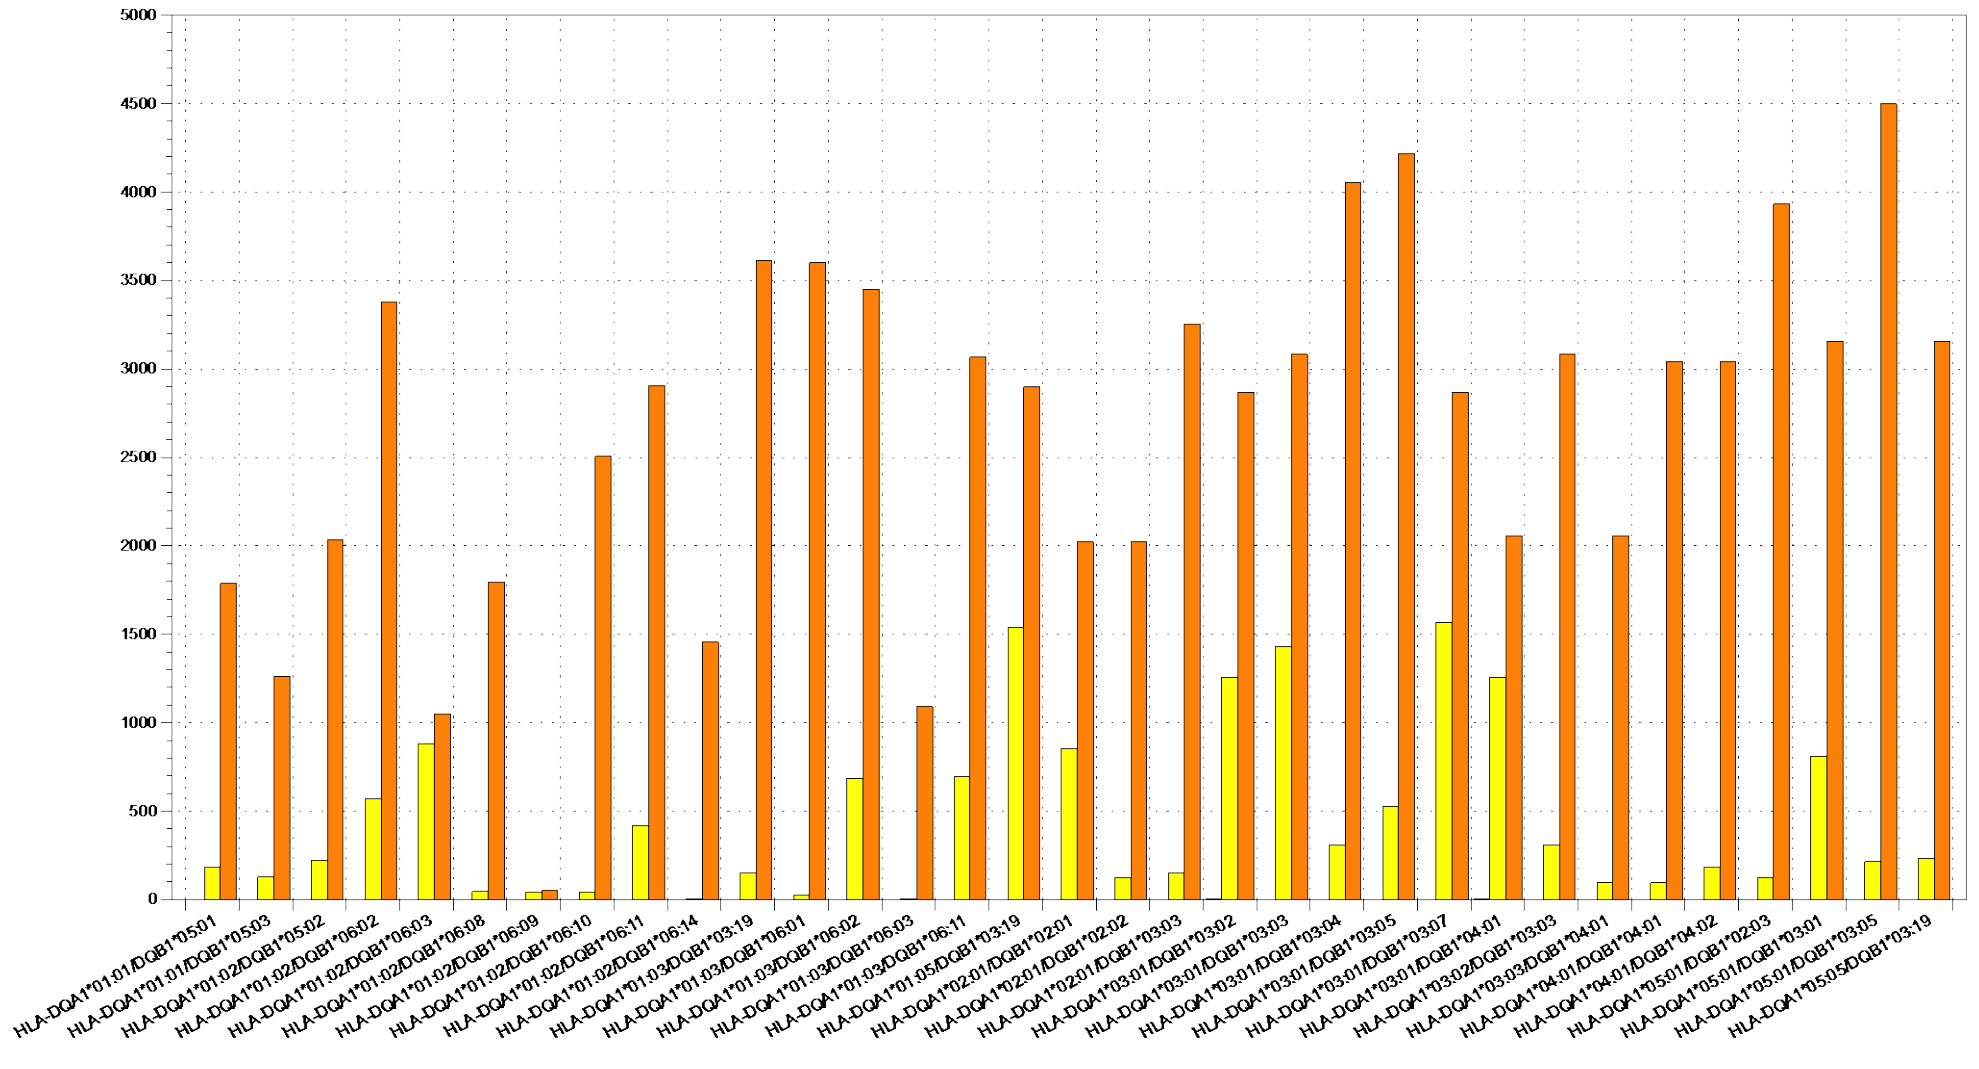

Allele combinations are ordered alphabetically on the x-axis, while the number of peptides binding with strong ( $IC_{50} \leq 50$  nM), regular ( $50$  nM  $< IC_{50} \leq 1000$  nM) and weak ( $1000$  nM  $< IC_{50} \leq 5000$  nM) binding prediction are displayed on the y-axis.

## HLA-DQA1/-DQB1 alleles ordered by number of presented peptides with strong binding prediction

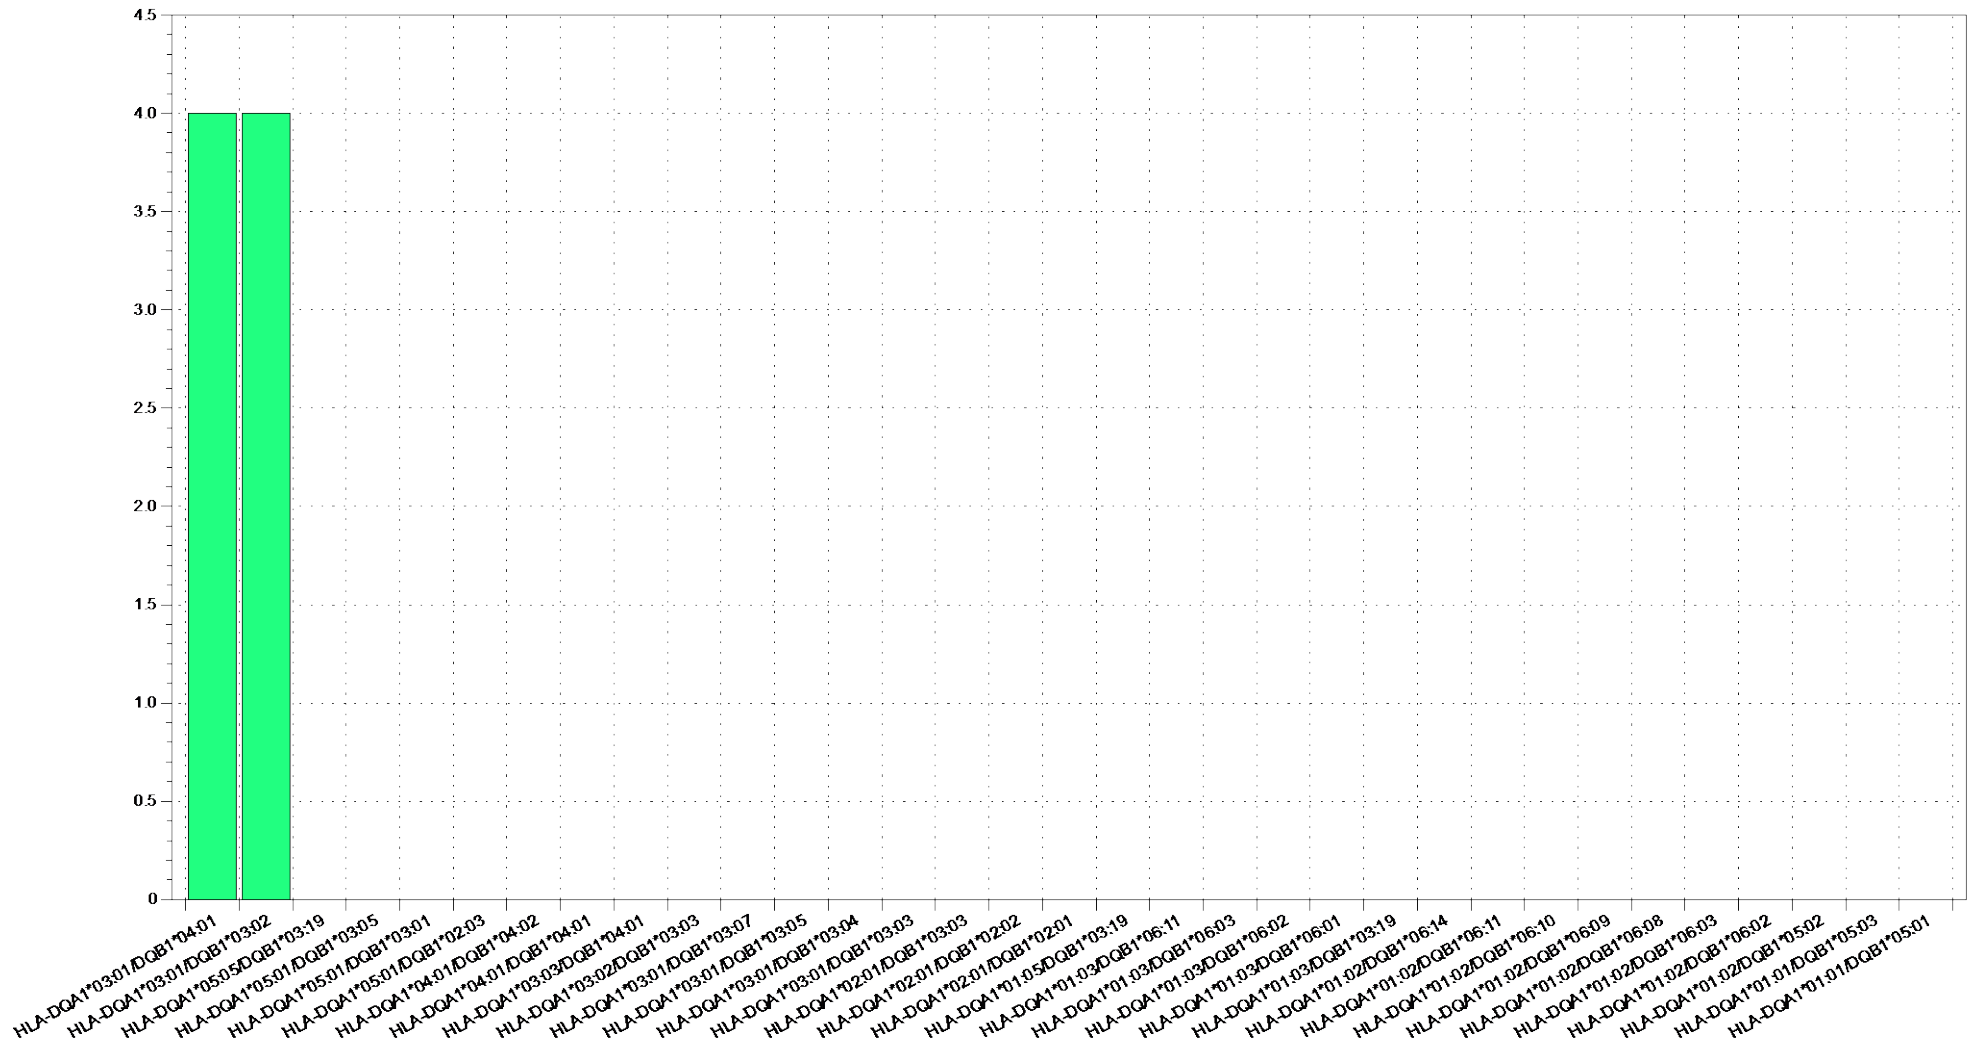

Allele combinations are ordered on the x-axis by their strong ( $IC_{50} \leq 50$  nM) binding prediction and the number of peptides presented are displayed on the y-axis.

## HLA-DQA1/-DQB1 alleles ordered by number of presented peptides with regular binding prediction

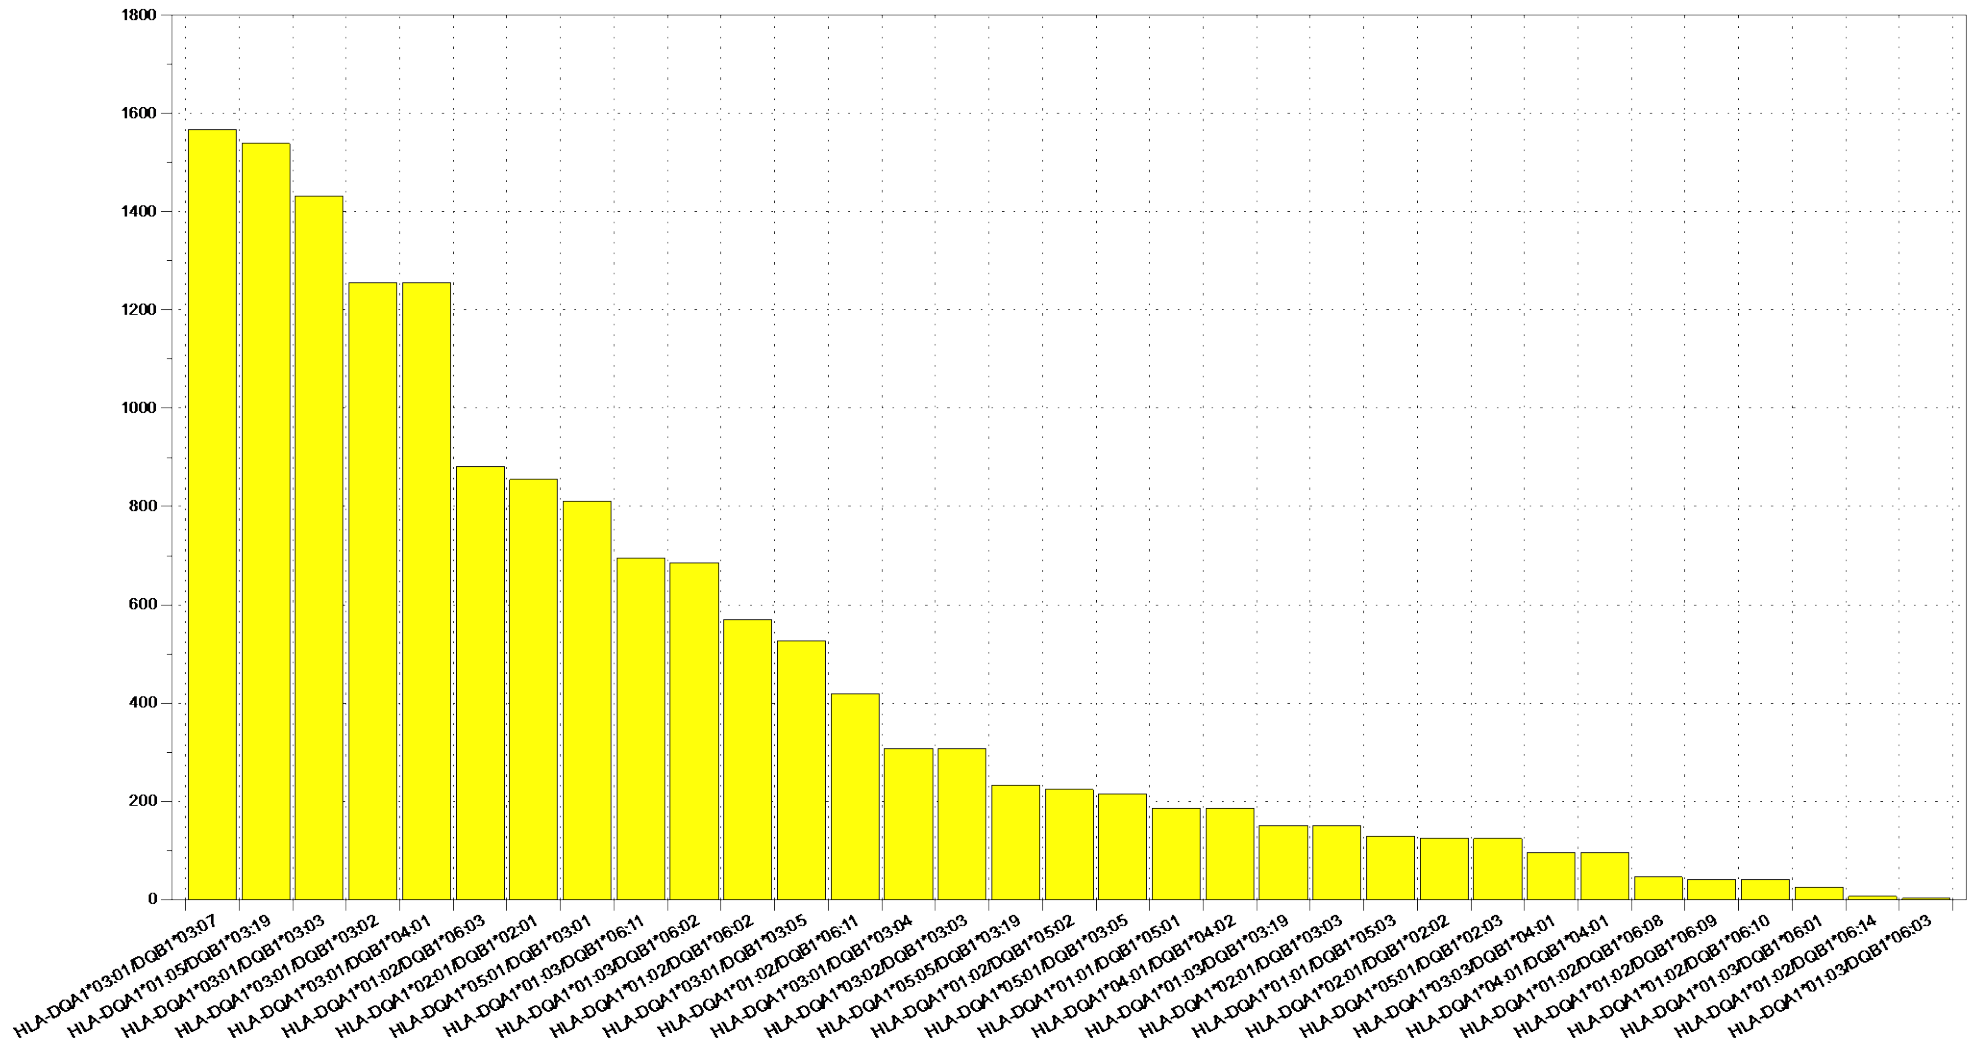

Allele combinations are ordered on the x-axis by their regular (50 nM < IC<sub>50</sub> ≤ 1000 nM) binding prediction and the number of peptides presented are displayed on the y-axis.

## HLA-DQA1/DQB1 alleles ordered by number of presented peptides with weak binding prediction

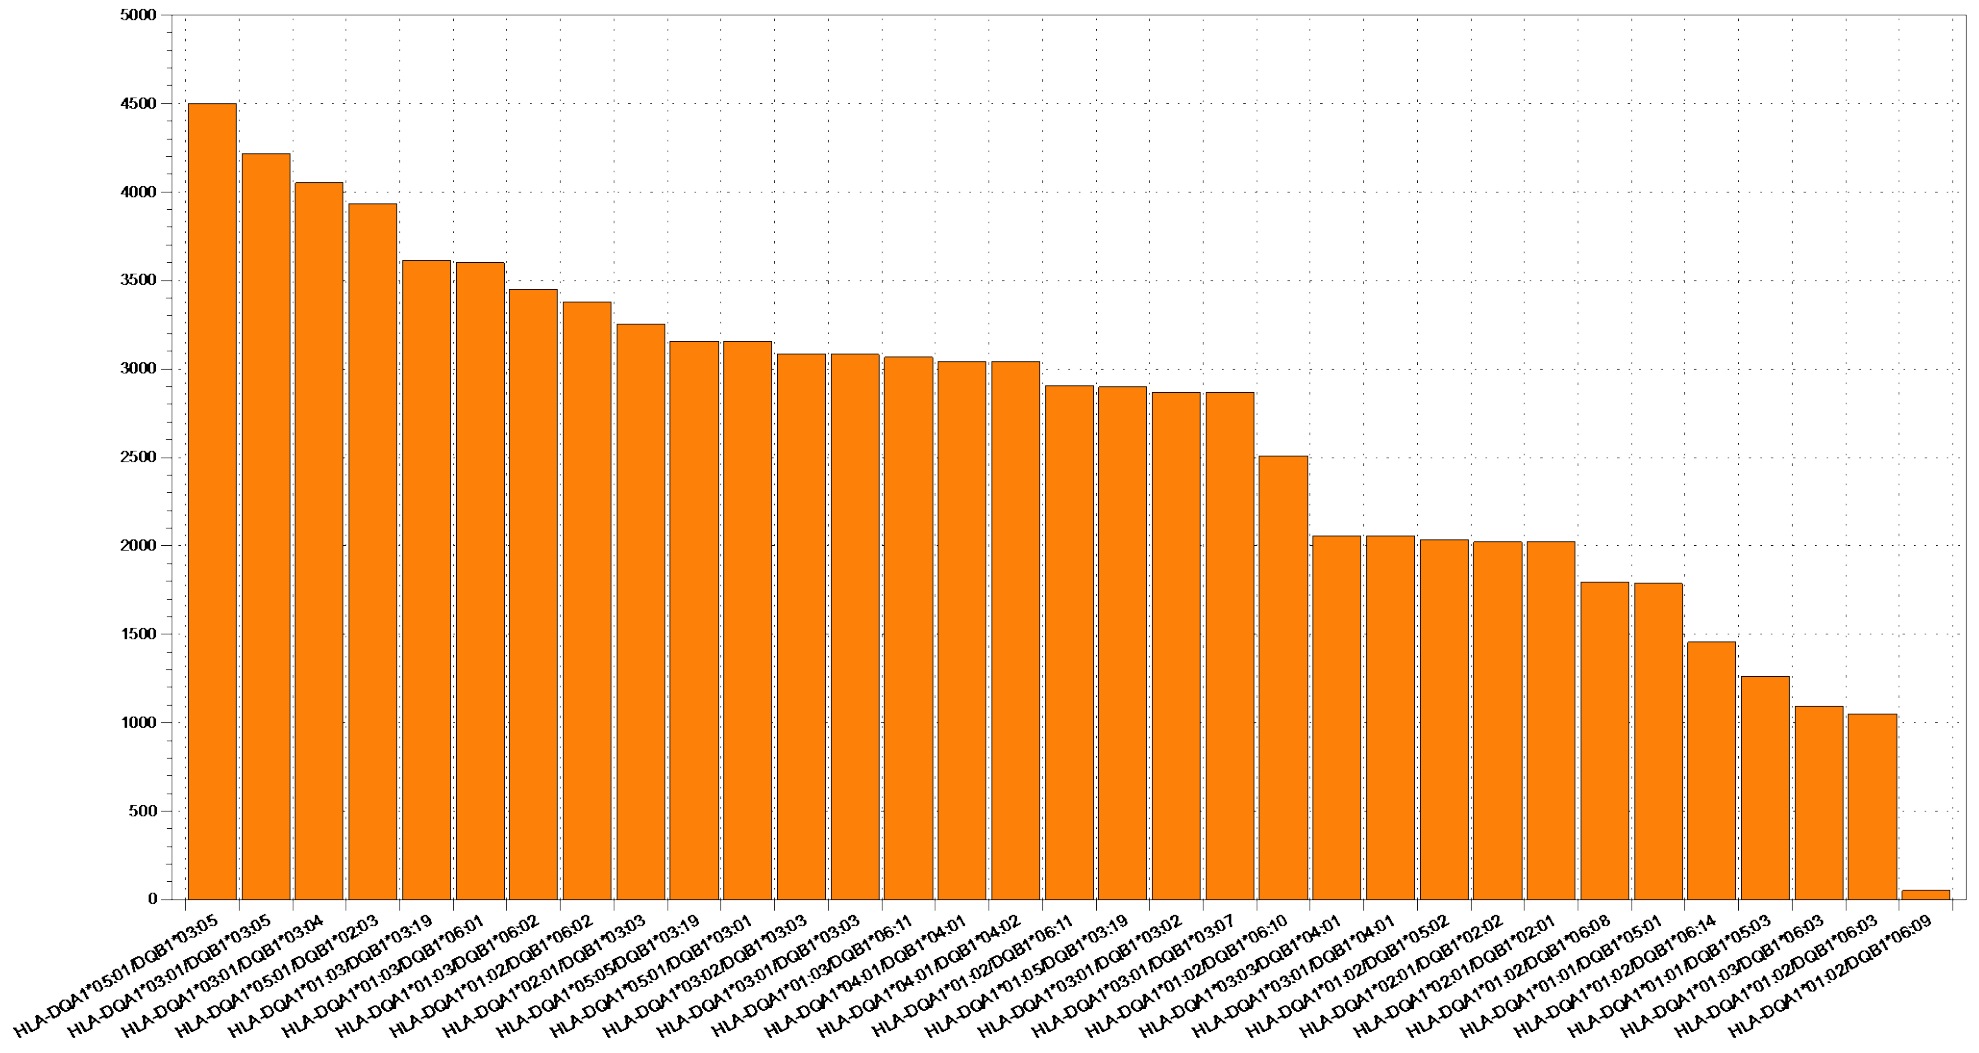

Allele combinations are ordered on the x-axis by their weak ( $1000 \text{ nM} < IC_{50} \leq 5000 \text{ nM}$ ) binding prediction and the number of peptides presented are displayed on the y-axis.
