# Supplementary material
Source: PubMed Central journal article supplement (PMC7300650)
Supplement: TAN-96-277-s007.pdf [file TAN-96-277-s007.pdf]

# Binding affinities of 438 HLA Class I and II proteins to the complete proteomes of seven (potentially) pandemic viruses and distributions of strongest and weakest HLA peptide binders in human populations worldwide

## Supplementary material 1

### Extended results for the binding predictions for SARS-CoV-2

#### Table of Contents

|                                                                                                            |    |
|------------------------------------------------------------------------------------------------------------|----|
| TOTAL NUMBER OF PEPTIDES WITH STRONG, REGULAR AND WEAK BINDING PREDICTIONS FOR <i>HLA-A</i> .....          | 2  |
| GENERAL BINDING PREDICTION TENDENCIES FOR <i>HLA-A</i> .....                                               | 4  |
| <i>HLA-A</i> ALLELES ORDERED BY NUMBER OF PRESENTED PEPTIDES WITH STRONG BINDING PREDICTION .....          | 5  |
| <i>HLA-A</i> ALLELES ORDERED BY NUMBER OF PRESENTED PEPTIDES WITH REGULAR BINDING PREDICTION.....          | 6  |
| <i>HLA-A</i> ALLELES ORDERED BY NUMBER OF PRESENTED PEPTIDES WITH WEAK BINDING PREDICTION.....             | 7  |
| TOTAL NUMBER OF PEPTIDES WITH STRONG, REGULAR AND WEAK BINDING PREDICTIONS FOR <i>HLA-B</i> .....          | 8  |
| GENERAL BINDING PREDICTION TENDENCIES FOR <i>HLA-B</i> .....                                               | 11 |
| <i>HLA-B</i> ALLELES ORDERED BY NUMBER OF PRESENTED PEPTIDES WITH STRONG BINDING PREDICTION .....          | 12 |
| <i>HLA-B</i> ALLELES ORDERED BY NUMBER OF PRESENTED PEPTIDES WITH REGULAR BINDING PREDICTION.....          | 13 |
| <i>HLA-B</i> ALLELES ORDERED BY NUMBER OF PRESENTED PEPTIDES WITH WEAK BINDING PREDICTION.....             | 14 |
| TOTAL NUMBER OF PEPTIDES WITH STRONG, REGULAR AND WEAK BINDING PREDICTIONS FOR <i>HLA-C</i> .....          | 15 |
| GENERAL BINDING PREDICTION TENDENCIES FOR <i>HLA-C</i> .....                                               | 16 |
| <i>HLA-C</i> ALLELES ORDERED BY NUMBER OF PRESENTED PEPTIDES WITH STRONG BINDING PREDICTION .....          | 17 |
| <i>HLA-C</i> ALLELES ORDERED BY NUMBER OF PRESENTED PEPTIDES WITH REGULAR BINDING PREDICTION.....          | 18 |
| <i>HLA-C</i> ALLELES ORDERED BY NUMBER OF PRESENTED PEPTIDES WITH WEAK BINDING PREDICTION .....            | 19 |
| TOTAL NUMBER OF PEPTIDES WITH STRONG, REGULAR AND WEAK BINDING PREDICTIONS FOR <i>HLA-DRB1</i> .....       | 20 |
| GENERAL BINDING PREDICTION TENDENCIES FOR <i>HLA-DRB1</i> .....                                            | 22 |
| <i>HLA-DRB1</i> ALLELES ORDERED BY NUMBER OF PRESENTED PEPTIDES WITH STRONG BINDING PREDICTION .....       | 23 |
| <i>HLA-DRB1</i> ALLELES ORDERED BY NUMBER OF PRESENTED PEPTIDES WITH REGULAR BINDING PREDICTION .....      | 24 |
| <i>HLA-DRB1</i> ALLELES ORDERED BY NUMBER OF PRESENTED PEPTIDES WITH WEAK BINDING PREDICTION .....         | 25 |
| TOTAL NUMBER OF PEPTIDES WITH STRONG, REGULAR AND WEAK BINDING PREDICTIONS FOR <i>HLA-DQA1/-DQB1</i> ....  | 26 |
| GENERAL BINDING PREDICTION TENDENCIES FOR <i>HLA-DQA1/-DQB1</i> .....                                      | 27 |
| <i>HLA-DQA1/-DQB1</i> ALLELES ORDERED BY NUMBER OF PRESENTED PEPTIDES WITH STRONG BINDING PREDICTION ..... | 28 |
| <i>HLA-DQA1/-DQB1</i> ALLELES ORDERED BY NUMBER OF PRESENTED PEPTIDES WITH REGULAR BINDING PREDICTION....  | 29 |
| <i>HLA-DQA1/-DQB1</i> ALLELES ORDERED BY NUMBER OF PRESENTED PEPTIDES WITH WEAK BINDING PREDICTION .....   | 30 |

## Total number of peptides with strong, regular and weak binding predictions for *HLA-A*

|             | <b>IC<sub>50</sub> ≤ 50 nM</b><br>Strong binders | <b>50 nM &lt; IC<sub>50</sub> ≤ 500 nM</b><br>Regular binders | <b>500 nM &lt; IC<sub>50</sub> ≤ 5000 nM</b><br>Weak binders | <b>IC<sub>50</sub> &gt; 5000 nM</b><br>Non binders |
|-------------|--------------------------------------------------|---------------------------------------------------------------|--------------------------------------------------------------|----------------------------------------------------|
| HLA-A*01:01 | 8                                                | 33                                                            | 172                                                          | 6876                                               |
| HLA-A*01:02 | 3                                                | 24                                                            | 268                                                          | 6794                                               |
| HLA-A*01:03 | 8                                                | 22                                                            | 154                                                          | 6905                                               |
| HLA-A*01:06 | 3                                                | 46                                                            | 199                                                          | 6841                                               |
| HLA-A*02:01 | 115                                              | 180                                                           | 472                                                          | 6322                                               |
| HLA-A*02:02 | 179                                              | 265                                                           | 733                                                          | 5912                                               |
| HLA-A*02:03 | 176                                              | 280                                                           | 656                                                          | 5977                                               |
| HLA-A*02:04 | 35                                               | 111                                                           | 336                                                          | 6607                                               |
| HLA-A*02:05 | 104                                              | 312                                                           | 926                                                          | 5747                                               |
| HLA-A*02:06 | 144                                              | 329                                                           | 809                                                          | 5807                                               |
| HLA-A*02:07 | 7                                                | 24                                                            | 143                                                          | 6915                                               |
| HLA-A*02:08 | 46                                               | 274                                                           | 928                                                          | 5841                                               |
| HLA-A*02:09 | 115                                              | 180                                                           | 472                                                          | 6322                                               |
| HLA-A*02:10 | 39                                               | 158                                                           | 579                                                          | 6313                                               |
| HLA-A*02:11 | 272                                              | 315                                                           | 644                                                          | 5858                                               |
| HLA-A*02:12 | 142                                              | 171                                                           | 440                                                          | 6336                                               |
| HLA-A*02:14 | 83                                               | 275                                                           | 782                                                          | 5949                                               |
| HLA-A*02:17 | 15                                               | 76                                                            | 314                                                          | 6684                                               |
| HLA-A*02:19 | 77                                               | 135                                                           | 332                                                          | 6545                                               |
| HLA-A*02:20 | 73                                               | 170                                                           | 466                                                          | 6380                                               |
| HLA-A*02:22 | 224                                              | 299                                                           | 759                                                          | 5807                                               |
| HLA-A*02:24 | 115                                              | 180                                                           | 472                                                          | 6322                                               |
| HLA-A*02:26 | 94                                               | 201                                                           | 468                                                          | 6326                                               |
| HLA-A*02:34 | 78                                               | 173                                                           | 463                                                          | 6375                                               |
| HLA-A*02:35 | 111                                              | 242                                                           | 585                                                          | 6151                                               |
| HLA-A*02:36 | 66                                               | 137                                                           | 386                                                          | 6500                                               |
| HLA-A*02:40 | 115                                              | 180                                                           | 472                                                          | 6322                                               |
| HLA-A*03:01 | 29                                               | 128                                                           | 254                                                          | 6678                                               |
| HLA-A*03:02 | 34                                               | 148                                                           | 312                                                          | 6595                                               |
| HLA-A*03:05 | 29                                               | 128                                                           | 254                                                          | 6678                                               |
| HLA-A*03:08 | 10                                               | 93                                                            | 283                                                          | 6703                                               |
| HLA-A*11:01 | 85                                               | 166                                                           | 327                                                          | 6511                                               |
| HLA-A*11:02 | 85                                               | 166                                                           | 327                                                          | 6511                                               |
| HLA-A*11:03 | 68                                               | 185                                                           | 372                                                          | 6464                                               |
| HLA-A*11:04 | 49                                               | 183                                                           | 325                                                          | 6532                                               |
| HLA-A*11:06 | 38                                               | 176                                                           | 364                                                          | 6511                                               |
| HLA-A*11:12 | 85                                               | 166                                                           | 327                                                          | 6511                                               |
| HLA-A*23:01 | 26                                               | 131                                                           | 335                                                          | 6597                                               |
| HLA-A*23:03 | 26                                               | 131                                                           | 335                                                          | 6597                                               |
| HLA-A*23:04 | 120                                              | 178                                                           | 556                                                          | 6235                                               |
| HLA-A*24:02 | 15                                               | 97                                                            | 251                                                          | 6726                                               |
| HLA-A*24:03 | 101                                              | 137                                                           | 433                                                          | 6418                                               |
| HLA-A*24:04 | 2                                                | 62                                                            | 293                                                          | 6732                                               |
| HLA-A*24:05 | 15                                               | 97                                                            | 251                                                          | 6726                                               |
| HLA-A*24:06 | 10                                               | 107                                                           | 305                                                          | 6667                                               |
| HLA-A*24:07 | 9                                                | 68                                                            | 261                                                          | 6751                                               |
| HLA-A*24:08 | 4                                                | 73                                                            | 320                                                          | 6692                                               |
| HLA-A*24:10 | 91                                               | 146                                                           | 511                                                          | 6341                                               |
| HLA-A*24:13 | 26                                               | 131                                                           | 335                                                          | 6597                                               |
| HLA-A*24:20 | 15                                               | 97                                                            | 251                                                          | 6726                                               |
| HLA-A*24:21 | 15                                               | 97                                                            | 251                                                          | 6726                                               |
| HLA-A*24:23 | 101                                              | 137                                                           | 433                                                          | 6418                                               |
| HLA-A*25:01 | 1                                                | 19                                                            | 130                                                          | 6939                                               |
| HLA-A*25:02 | 1                                                | 16                                                            | 149                                                          | 6923                                               |
| HLA-A*26:01 | 9                                                | 51                                                            | 225                                                          | 6804                                               |
| HLA-A*26:02 | 57                                               | 168                                                           | 585                                                          | 6279                                               |
| HLA-A*26:03 | 2                                                | 43                                                            | 339                                                          | 6705                                               |
| HLA-A*26:05 | 8                                                | 47                                                            | 224                                                          | 6810                                               |
| HLA-A*26:08 | 7                                                | 71                                                            | 355                                                          | 6656                                               |
| HLA-A*26:12 | 9                                                | 65                                                            | 323                                                          | 6692                                               |
| HLA-A*26:18 | 9                                                | 65                                                            | 323                                                          | 6692                                               |
| HLA-A*29:01 | 61                                               | 147                                                           | 413                                                          | 6468                                               |

|             | <b>IC<sub>50</sub> ≤ 50 nM</b><br><b>Strong binders</b> | <b>50 nM &lt; IC<sub>50</sub> ≤ 500 nM</b><br><b>Regular binders</b> | <b>500 nM &lt; IC<sub>50</sub> ≤ 5000 nM</b><br><b>Weak binders</b> | <b>IC<sub>50</sub> &gt; 5000 nM</b><br><b>Non binders</b> |
|-------------|---------------------------------------------------------|----------------------------------------------------------------------|---------------------------------------------------------------------|-----------------------------------------------------------|
| HLA-A*29:02 | 61                                                      | 147                                                                  | 413                                                                 | 6468                                                      |
| HLA-A*30:01 | 51                                                      | 310                                                                  | 1123                                                                | 5605                                                      |
| HLA-A*30:02 | 23                                                      | 137                                                                  | 450                                                                 | 6479                                                      |
| HLA-A*30:04 | 0                                                       | 72                                                                   | 774                                                                 | 6243                                                      |
| HLA-A*30:08 | 2                                                       | 57                                                                   | 521                                                                 | 6509                                                      |
| HLA-A*31:01 | 45                                                      | 155                                                                  | 450                                                                 | 6439                                                      |
| HLA-A*31:02 | 39                                                      | 163                                                                  | 503                                                                 | 6384                                                      |
| HLA-A*31:04 | 77                                                      | 224                                                                  | 522                                                                 | 6266                                                      |
| HLA-A*31:08 | 40                                                      | 223                                                                  | 774                                                                 | 6052                                                      |
| HLA-A*32:01 | 36                                                      | 153                                                                  | 574                                                                 | 6326                                                      |
| HLA-A*32:02 | 14                                                      | 101                                                                  | 520                                                                 | 6454                                                      |
| HLA-A*32:03 | 8                                                       | 90                                                                   | 457                                                                 | 6534                                                      |
| HLA-A*33:01 | 26                                                      | 86                                                                   | 241                                                                 | 6736                                                      |
| HLA-A*33:03 | 33                                                      | 121                                                                  | 297                                                                 | 6638                                                      |
| HLA-A*34:01 | 4                                                       | 106                                                                  | 724                                                                 | 6255                                                      |
| HLA-A*34:02 | 21                                                      | 188                                                                  | 435                                                                 | 6445                                                      |
| HLA-A*36:01 | 6                                                       | 51                                                                   | 309                                                                 | 6723                                                      |
| HLA-A*43:01 | 2                                                       | 52                                                                   | 340                                                                 | 6695                                                      |
| HLA-A*66:01 | 3                                                       | 55                                                                   | 431                                                                 | 6600                                                      |
| HLA-A*66:02 | 5                                                       | 85                                                                   | 642                                                                 | 6357                                                      |
| HLA-A*66:03 | 1                                                       | 54                                                                   | 508                                                                 | 6526                                                      |
| HLA-A*68:01 | 111                                                     | 203                                                                  | 507                                                                 | 6268                                                      |
| HLA-A*68:02 | 98                                                      | 231                                                                  | 736                                                                 | 6024                                                      |
| HLA-A*68:03 | 56                                                      | 163                                                                  | 418                                                                 | 6452                                                      |
| HLA-A*68:06 | 4                                                       | 95                                                                   | 608                                                                 | 6382                                                      |
| HLA-A*68:12 | 111                                                     | 203                                                                  | 507                                                                 | 6268                                                      |
| HLA-A*69:01 | 56                                                      | 169                                                                  | 656                                                                 | 6208                                                      |
| HLA-A*74:01 | 1                                                       | 36                                                                   | 247                                                                 | 6805                                                      |
| HLA-A*74:03 | 1                                                       | 36                                                                   | 247                                                                 | 6805                                                      |
| HLA-A*80:01 | 18                                                      | 60                                                                   | 141                                                                 | 6870                                                      |

Alleles are ordered alphabetically.

## General binding prediction tendencies for *HLA-A*

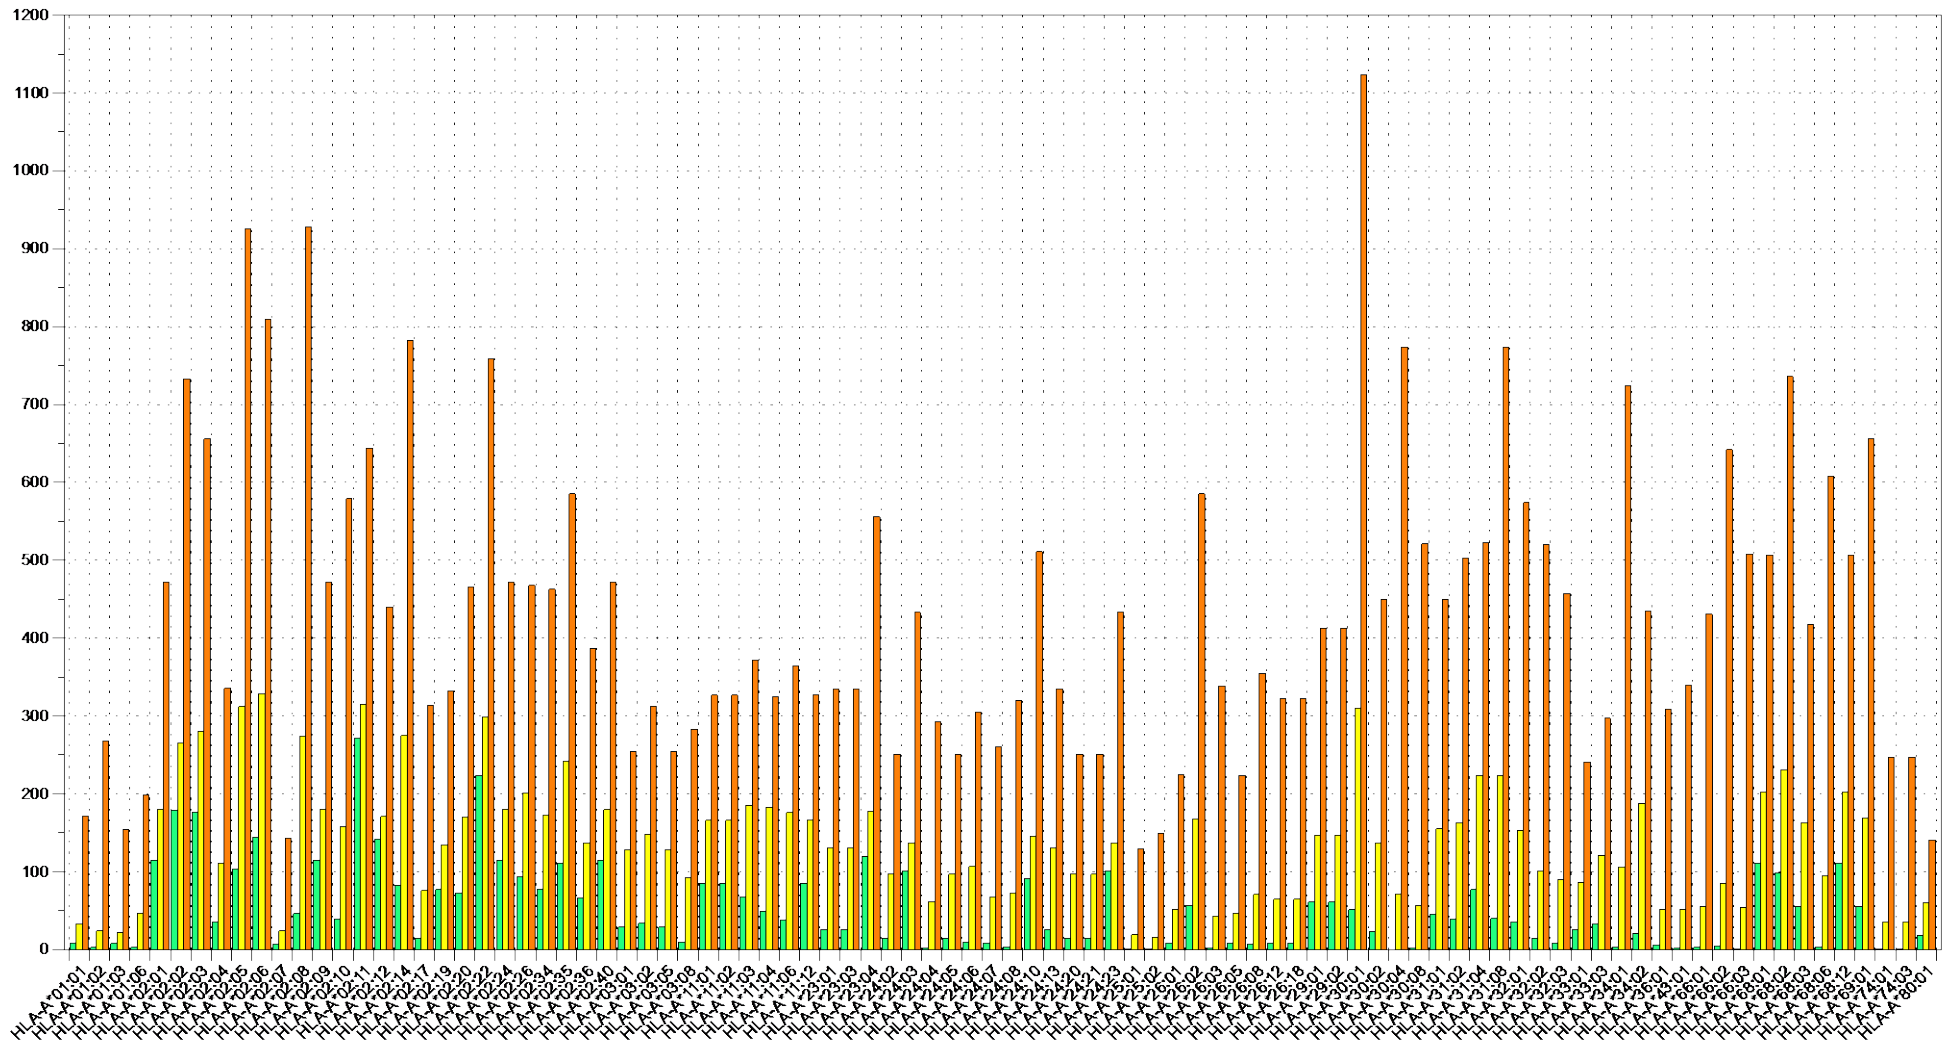

Alleles are ordered alphabetically on the x-axis, while the number of peptides binding with strong ( $IC_{50} \leq 50$  nM), regular ( $50$  nM  $< IC_{50} \leq 500$  nM) and weak ( $500$  nM  $< IC_{50} \leq 5000$  nM) binding prediction are displayed on the y-axis.



## HLA-A alleles ordered by number of presented peptides with regular binding prediction

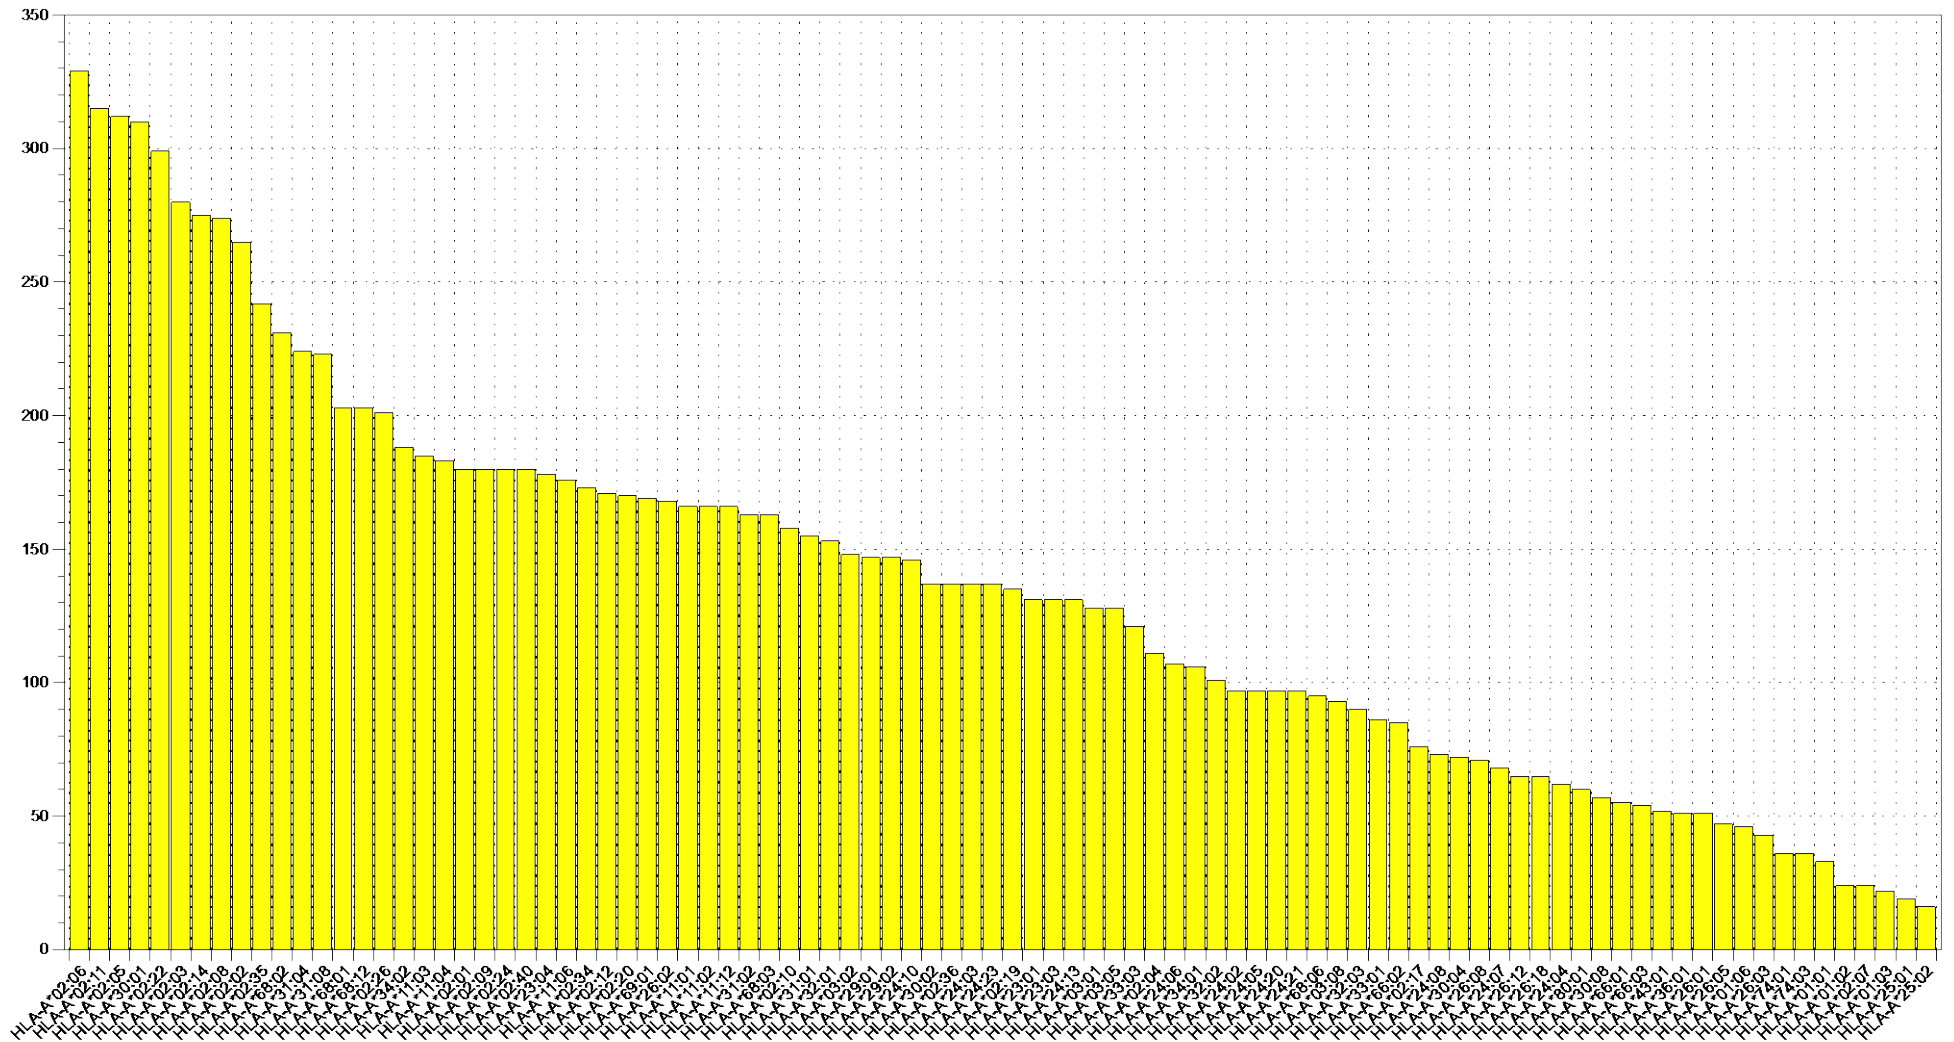

Alleles are ordered on the x-axis by their regular ( $50 \text{ nM} < IC_{50} \leq 500 \text{ nM}$ ) binding prediction and the number of peptides presented are displayed on the y-axis.



## Total number of peptides with strong, regular and weak binding predictions for *HLA-B*

|             | <b>IC<sub>50</sub> ≤ 50 nM</b><br>Strong binders | <b>50 nM &lt; IC<sub>50</sub> ≤ 500 nM</b><br>Regular binders | <b>500 nM &lt; IC<sub>50</sub> ≤ 5000 nM</b><br>Weak binders | <b>IC<sub>50</sub> &gt; 5000 nM</b><br>Non binders |
|-------------|--------------------------------------------------|---------------------------------------------------------------|--------------------------------------------------------------|----------------------------------------------------|
| HLA-B*07:02 | 15                                               | 51                                                            | 251                                                          | 6772                                               |
| HLA-B*07:04 | 6                                                | 57                                                            | 270                                                          | 6756                                               |
| HLA-B*07:05 | 18                                               | 64                                                            | 314                                                          | 6693                                               |
| HLA-B*07:06 | 18                                               | 64                                                            | 314                                                          | 6693                                               |
| HLA-B*08:01 | 12                                               | 73                                                            | 444                                                          | 6560                                               |
| HLA-B*08:03 | 0                                                | 1                                                             | 47                                                           | 7041                                               |
| HLA-B*08:04 | 3                                                | 33                                                            | 404                                                          | 6649                                               |
| HLA-B*08:05 | 5                                                | 39                                                            | 351                                                          | 6694                                               |
| HLA-B*13:01 | 6                                                | 65                                                            | 664                                                          | 6354                                               |
| HLA-B*13:02 | 0                                                | 15                                                            | 331                                                          | 6743                                               |
| HLA-B*13:03 | 0                                                | 18                                                            | 378                                                          | 6693                                               |
| HLA-B*13:04 | 0                                                | 26                                                            | 624                                                          | 6439                                               |
| HLA-B*14:01 | 1                                                | 16                                                            | 192                                                          | 6880                                               |
| HLA-B*14:02 | 1                                                | 16                                                            | 192                                                          | 6880                                               |
| HLA-B*14:03 | 0                                                | 11                                                            | 226                                                          | 6852                                               |
| HLA-B*15:01 | 59                                               | 207                                                           | 649                                                          | 6174                                               |
| HLA-B*15:02 | 29                                               | 177                                                           | 589                                                          | 6294                                               |
| HLA-B*15:03 | 203                                              | 478                                                           | 1162                                                         | 5246                                               |
| HLA-B*15:04 | 0                                                | 33                                                            | 686                                                          | 6370                                               |
| HLA-B*15:05 | 43                                               | 243                                                           | 796                                                          | 6007                                               |
| HLA-B*15:06 | 63                                               | 220                                                           | 681                                                          | 6125                                               |
| HLA-B*15:07 | 22                                               | 174                                                           | 609                                                          | 6284                                               |
| HLA-B*15:08 | 2                                                | 54                                                            | 354                                                          | 6679                                               |
| HLA-B*15:09 | 2                                                | 9                                                             | 104                                                          | 6974                                               |
| HLA-B*15:10 | 1                                                | 10                                                            | 106                                                          | 6972                                               |
| HLA-B*15:11 | 3                                                | 52                                                            | 347                                                          | 6687                                               |
| HLA-B*15:12 | 3                                                | 97                                                            | 423                                                          | 6566                                               |
| HLA-B*15:13 | 0                                                | 34                                                            | 508                                                          | 6547                                               |
| HLA-B*15:15 | 13                                               | 140                                                           | 533                                                          | 6403                                               |
| HLA-B*15:16 | 33                                               | 208                                                           | 665                                                          | 6183                                               |
| HLA-B*15:17 | 154                                              | 282                                                           | 551                                                          | 6102                                               |
| HLA-B*15:18 | 1                                                | 52                                                            | 404                                                          | 6632                                               |
| HLA-B*15:20 | 44                                               | 233                                                           | 771                                                          | 6041                                               |
| HLA-B*15:21 | 0                                                | 23                                                            | 305                                                          | 6761                                               |
| HLA-B*15:24 | 0                                                | 52                                                            | 560                                                          | 6477                                               |
| HLA-B*15:25 | 104                                              | 231                                                           | 820                                                          | 5934                                               |
| HLA-B*15:27 | 33                                               | 178                                                           | 528                                                          | 6350                                               |
| HLA-B*15:29 | 65                                               | 293                                                           | 938                                                          | 5793                                               |
| HLA-B*15:31 | 16                                               | 150                                                           | 680                                                          | 6243                                               |
| HLA-B*15:32 | 43                                               | 230                                                           | 822                                                          | 5994                                               |
| HLA-B*15:34 | 59                                               | 207                                                           | 649                                                          | 6174                                               |
| HLA-B*15:35 | 19                                               | 160                                                           | 564                                                          | 6346                                               |
| HLA-B*15:38 | 42                                               | 208                                                           | 728                                                          | 6111                                               |
| HLA-B*15:39 | 103                                              | 239                                                           | 834                                                          | 5913                                               |
| HLA-B*15:40 | 14                                               | 136                                                           | 567                                                          | 6372                                               |
| HLA-B*15:58 | 0                                                | 19                                                            | 365                                                          | 6705                                               |
| HLA-B*18:01 | 9                                                | 48                                                            | 226                                                          | 6806                                               |
| HLA-B*18:02 | 6                                                | 50                                                            | 341                                                          | 6692                                               |
| HLA-B*18:03 | 3                                                | 43                                                            | 286                                                          | 6757                                               |
| HLA-B*18:05 | 9                                                | 48                                                            | 226                                                          | 6806                                               |
| HLA-B*18:07 | 2                                                | 30                                                            | 345                                                          | 6712                                               |
| HLA-B*27:02 | 0                                                | 13                                                            | 67                                                           | 7009                                               |
| HLA-B*27:03 | 0                                                | 3                                                             | 48                                                           | 7038                                               |
| HLA-B*27:04 | 1                                                | 17                                                            | 95                                                           | 6976                                               |
| HLA-B*27:05 | 8                                                | 53                                                            | 188                                                          | 6840                                               |
| HLA-B*27:06 | 20                                               | 50                                                            | 235                                                          | 6784                                               |
| HLA-B*27:07 | 28                                               | 84                                                            | 351                                                          | 6626                                               |
| HLA-B*27:08 | 11                                               | 46                                                            | 210                                                          | 6822                                               |
| HLA-B*27:09 | 19                                               | 57                                                            | 227                                                          | 6786                                               |
| HLA-B*27:12 | 12                                               | 77                                                            | 294                                                          | 6706                                               |
| HLA-B*27:14 | 0                                                | 18                                                            | 131                                                          | 6940                                               |
| HLA-B*35:01 | 61                                               | 169                                                           | 542                                                          | 6317                                               |



|             | IC <sub>50</sub> ≤ 50 nM<br>Strong binders | 50 nM < IC <sub>50</sub> ≤ 500 nM<br>Regular binders | 500 nM < IC <sub>50</sub> ≤ 5000 nM<br>Weak binders | IC <sub>50</sub> > 5000 nM<br>Non binders |
|-------------|--------------------------------------------|------------------------------------------------------|-----------------------------------------------------|-------------------------------------------|
| HLA-B*35:02 | 3                                          | 31                                                   | 193                                                 | 6862                                      |
| HLA-B*35:03 | 2                                          | 13                                                   | 125                                                 | 6949                                      |
| HLA-B*35:04 | 3                                          | 31                                                   | 193                                                 | 6862                                      |
| HLA-B*35:05 | 41                                         | 179                                                  | 667                                                 | 6202                                      |
| HLA-B*35:06 | 2                                          | 10                                                   | 109                                                 | 6968                                      |
| HLA-B*35:08 | 9                                          | 66                                                   | 314                                                 | 6700                                      |
| HLA-B*35:09 | 3                                          | 31                                                   | 193                                                 | 6862                                      |
| HLA-B*35:10 | 147                                        | 323                                                  | 976                                                 | 5643                                      |
| HLA-B*35:11 | 55                                         | 209                                                  | 693                                                 | 6132                                      |
| HLA-B*35:12 | 3                                          | 31                                                   | 193                                                 | 6862                                      |
| HLA-B*35:17 | 37                                         | 163                                                  | 599                                                 | 6290                                      |
| HLA-B*35:19 | 67                                         | 233                                                  | 710                                                 | 6079                                      |
| HLA-B*35:20 | 26                                         | 169                                                  | 726                                                 | 6168                                      |
| HLA-B*35:21 | 30                                         | 197                                                  | 699                                                 | 6163                                      |
| HLA-B*35:32 | 63                                         | 193                                                  | 582                                                 | 6251                                      |
| HLA-B*35:43 | 13                                         | 141                                                  | 604                                                 | 6331                                      |
| HLA-B*37:01 | 0                                          | 27                                                   | 205                                                 | 6857                                      |
| HLA-B*38:01 | 2                                          | 25                                                   | 165                                                 | 6897                                      |
| HLA-B*38:02 | 2                                          | 26                                                   | 165                                                 | 6896                                      |
| HLA-B*39:01 | 27                                         | 89                                                   | 381                                                 | 6592                                      |
| HLA-B*39:02 | 36                                         | 191                                                  | 874                                                 | 5988                                      |
| HLA-B*39:03 | 22                                         | 87                                                   | 432                                                 | 6548                                      |
| HLA-B*39:04 | 27                                         | 89                                                   | 381                                                 | 6592                                      |
| HLA-B*39:05 | 3                                          | 39                                                   | 182                                                 | 6865                                      |
| HLA-B*39:06 | 9                                          | 41                                                   | 248                                                 | 6791                                      |
| HLA-B*39:07 | 7                                          | 95                                                   | 574                                                 | 6413                                      |
| HLA-B*39:09 | 13                                         | 98                                                   | 470                                                 | 6508                                      |
| HLA-B*39:10 | 16                                         | 120                                                  | 538                                                 | 6415                                      |
| HLA-B*39:15 | 15                                         | 79                                                   | 333                                                 | 6662                                      |
| HLA-B*39:24 | 22                                         | 87                                                   | 432                                                 | 6548                                      |
| HLA-B*40:01 | 27                                         | 41                                                   | 135                                                 | 6886                                      |
| HLA-B*40:02 | 29                                         | 100                                                  | 242                                                 | 6718                                      |
| HLA-B*40:03 | 10                                         | 71                                                   | 321                                                 | 6687                                      |
| HLA-B*40:04 | 35                                         | 91                                                   | 214                                                 | 6749                                      |
| HLA-B*40:05 | 13                                         | 81                                                   | 371                                                 | 6624                                      |
| HLA-B*40:06 | 6                                          | 57                                                   | 170                                                 | 6856                                      |
| HLA-B*40:09 | 25                                         | 86                                                   | 222                                                 | 6756                                      |
| HLA-B*40:10 | 1                                          | 40                                                   | 136                                                 | 6912                                      |
| HLA-B*40:11 | 37                                         | 87                                                   | 212                                                 | 6753                                      |
| HLA-B*40:12 | 1                                          | 25                                                   | 136                                                 | 6927                                      |
| HLA-B*40:14 | 37                                         | 87                                                   | 212                                                 | 6753                                      |
| HLA-B*40:16 | 8                                          | 69                                                   | 236                                                 | 6776                                      |
| HLA-B*40:40 | 17                                         | 64                                                   | 418                                                 | 6590                                      |
| HLA-B*41:01 | 13                                         | 86                                                   | 194                                                 | 6796                                      |
| HLA-B*41:02 | 24                                         | 103                                                  | 275                                                 | 6687                                      |
| HLA-B*42:01 | 28                                         | 108                                                  | 506                                                 | 6447                                      |
| HLA-B*42:02 | 4                                          | 38                                                   | 339                                                 | 6708                                      |
| HLA-B*44:02 | 5                                          | 37                                                   | 132                                                 | 6915                                      |
| HLA-B*44:03 | 7                                          | 35                                                   | 140                                                 | 6907                                      |
| HLA-B*44:04 | 2                                          | 21                                                   | 102                                                 | 6964                                      |
| HLA-B*44:05 | 0                                          | 16                                                   | 95                                                  | 6978                                      |
| HLA-B*44:06 | 0                                          | 0                                                    | 64                                                  | 7025                                      |
| HLA-B*44:07 | 7                                          | 35                                                   | 140                                                 | 6907                                      |
| HLA-B*44:09 | 5                                          | 68                                                   | 289                                                 | 6727                                      |
| HLA-B*44:15 | 0                                          | 25                                                   | 119                                                 | 6945                                      |
| HLA-B*45:01 | 9                                          | 57                                                   | 163                                                 | 6860                                      |
| HLA-B*46:01 | 0                                          | 2                                                    | 105                                                 | 6982                                      |
| HLA-B*47:01 | 1                                          | 30                                                   | 444                                                 | 6614                                      |
| HLA-B*47:03 | 5                                          | 61                                                   | 394                                                 | 6629                                      |
| HLA-B*48:01 | 1                                          | 15                                                   | 106                                                 | 6967                                      |
| HLA-B*48:02 | 89                                         | 348                                                  | 1042                                                | 5610                                      |
| HLA-B*48:03 | 1                                          | 25                                                   | 136                                                 | 6927                                      |
| HLA-B*48:04 | 1                                          | 15                                                   | 106                                                 | 6967                                      |
| HLA-B*49:01 | 4                                          | 29                                                   | 139                                                 | 6917                                      |
| HLA-B*50:01 | 11                                         | 53                                                   | 233                                                 | 6792                                      |

|             | <b>IC<sub>50</sub> ≤ 50 nM</b><br><b>Strong binders</b> | <b>50 nM &lt; IC<sub>50</sub> ≤ 500 nM</b><br><b>Regular binders</b> | <b>500 nM &lt; IC<sub>50</sub> ≤ 5000 nM</b><br><b>Weak binders</b> | <b>IC<sub>50</sub> &gt; 5000 nM</b><br><b>Non binders</b> |
|-------------|---------------------------------------------------------|----------------------------------------------------------------------|---------------------------------------------------------------------|-----------------------------------------------------------|
| HLA-B*50:02 | 1                                                       | 40                                                                   | 135                                                                 | 6913                                                      |
| HLA-B*51:01 | 2                                                       | 16                                                                   | 110                                                                 | 6961                                                      |
| HLA-B*51:02 | 3                                                       | 25                                                                   | 142                                                                 | 6919                                                      |
| HLA-B*51:04 | 0                                                       | 10                                                                   | 151                                                                 | 6928                                                      |
| HLA-B*51:05 | 0                                                       | 8                                                                    | 55                                                                  | 7026                                                      |
| HLA-B*51:06 | 0                                                       | 12                                                                   | 179                                                                 | 6898                                                      |
| HLA-B*51:07 | 0                                                       | 0                                                                    | 58                                                                  | 7031                                                      |
| HLA-B*51:08 | 0                                                       | 8                                                                    | 93                                                                  | 6988                                                      |
| HLA-B*51:09 | 1                                                       | 10                                                                   | 97                                                                  | 6981                                                      |
| HLA-B*52:01 | 0                                                       | 2                                                                    | 126                                                                 | 6961                                                      |
| HLA-B*53:01 | 11                                                      | 59                                                                   | 333                                                                 | 6686                                                      |
| HLA-B*53:02 | 6                                                       | 40                                                                   | 322                                                                 | 6721                                                      |
| HLA-B*53:03 | 17                                                      | 156                                                                  | 713                                                                 | 6203                                                      |
| HLA-B*53:05 | 10                                                      | 59                                                                   | 361                                                                 | 6659                                                      |
| HLA-B*54:01 | 14                                                      | 50                                                                   | 211                                                                 | 6814                                                      |
| HLA-B*55:01 | 5                                                       | 24                                                                   | 222                                                                 | 6838                                                      |
| HLA-B*55:02 | 15                                                      | 61                                                                   | 296                                                                 | 6717                                                      |
| HLA-B*55:04 | 42                                                      | 134                                                                  | 627                                                                 | 6286                                                      |
| HLA-B*55:07 | 14                                                      | 50                                                                   | 211                                                                 | 6814                                                      |
| HLA-B*55:12 | 10                                                      | 55                                                                   | 302                                                                 | 6722                                                      |
| HLA-B*56:01 | 11                                                      | 50                                                                   | 266                                                                 | 6762                                                      |
| HLA-B*56:02 | 12                                                      | 92                                                                   | 471                                                                 | 6514                                                      |
| HLA-B*56:03 | 5                                                       | 124                                                                  | 752                                                                 | 6208                                                      |
| HLA-B*56:04 | 12                                                      | 92                                                                   | 471                                                                 | 6514                                                      |
| HLA-B*57:01 | 16                                                      | 63                                                                   | 339                                                                 | 6671                                                      |
| HLA-B*57:02 | 6                                                       | 56                                                                   | 256                                                                 | 6771                                                      |
| HLA-B*57:03 | 21                                                      | 102                                                                  | 375                                                                 | 6591                                                      |
| HLA-B*58:01 | 42                                                      | 117                                                                  | 488                                                                 | 6442                                                      |
| HLA-B*58:02 | 0                                                       | 5                                                                    | 45                                                                  | 7039                                                      |
| HLA-B*59:01 | 2                                                       | 20                                                                   | 251                                                                 | 6816                                                      |
| HLA-B*67:01 | 23                                                      | 83                                                                   | 405                                                                 | 6578                                                      |
| HLA-B*73:01 | 0                                                       | 3                                                                    | 115                                                                 | 6971                                                      |
| HLA-B*78:01 | 0                                                       | 23                                                                   | 230                                                                 | 6836                                                      |
| HLA-B*78:02 | 0                                                       | 12                                                                   | 138                                                                 | 6939                                                      |
| HLA-B*81:01 | 3                                                       | 25                                                                   | 145                                                                 | 6916                                                      |
| HLA-B*82:01 | 0                                                       | 4                                                                    | 113                                                                 | 6972                                                      |
| HLA-B*82:02 | 0                                                       | 4                                                                    | 113                                                                 | 6972                                                      |

Alleles are ordered alphabetically.

## General binding prediction tendencies for *HLA-B*

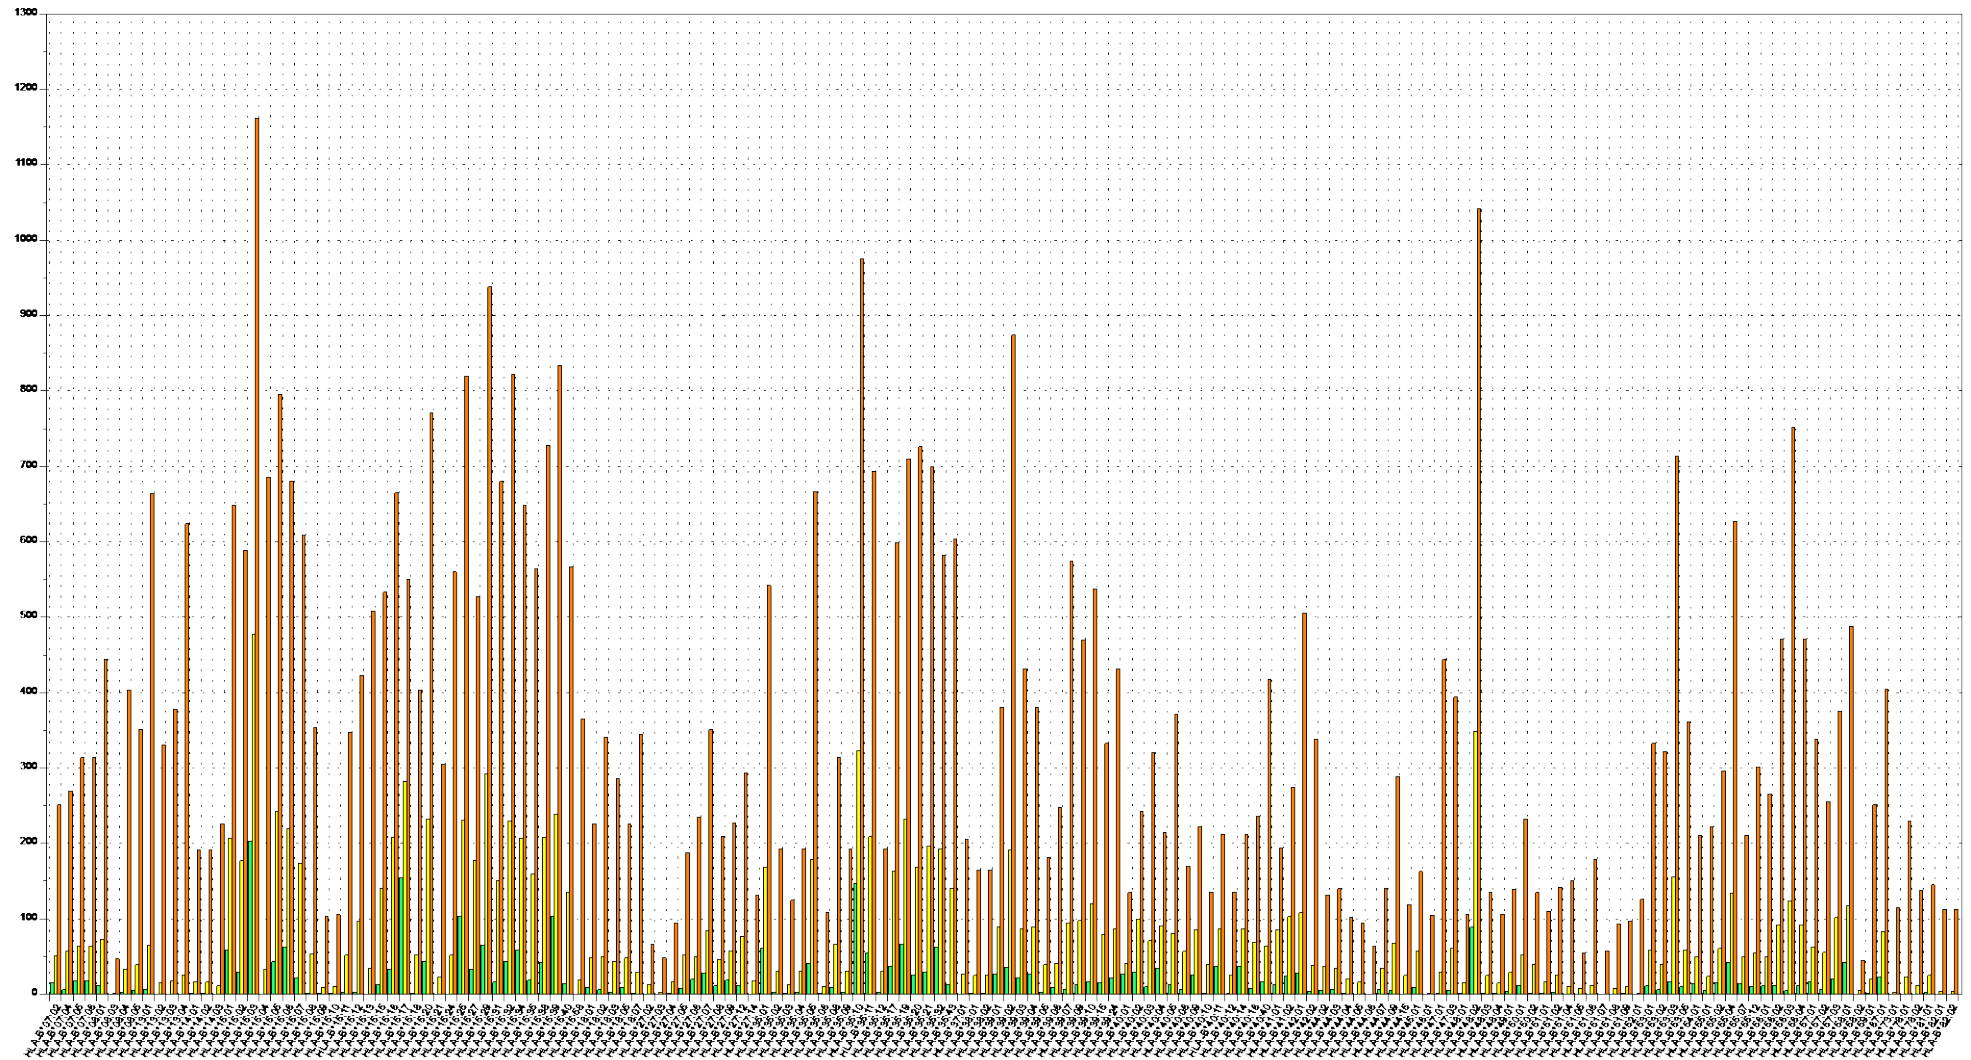

Alleles are ordered alphabetically on the x-axis, while the number of peptides binding with strong ( $IC_{50} \leq 50$  nM), regular ( $50$  nM  $< IC_{50} \leq 500$  nM) and weak ( $500$  nM  $< IC_{50} \leq 5000$  nM) binding prediction are displayed on the y-axis.

## HLA-B alleles ordered by number of presented peptides with strong binding prediction

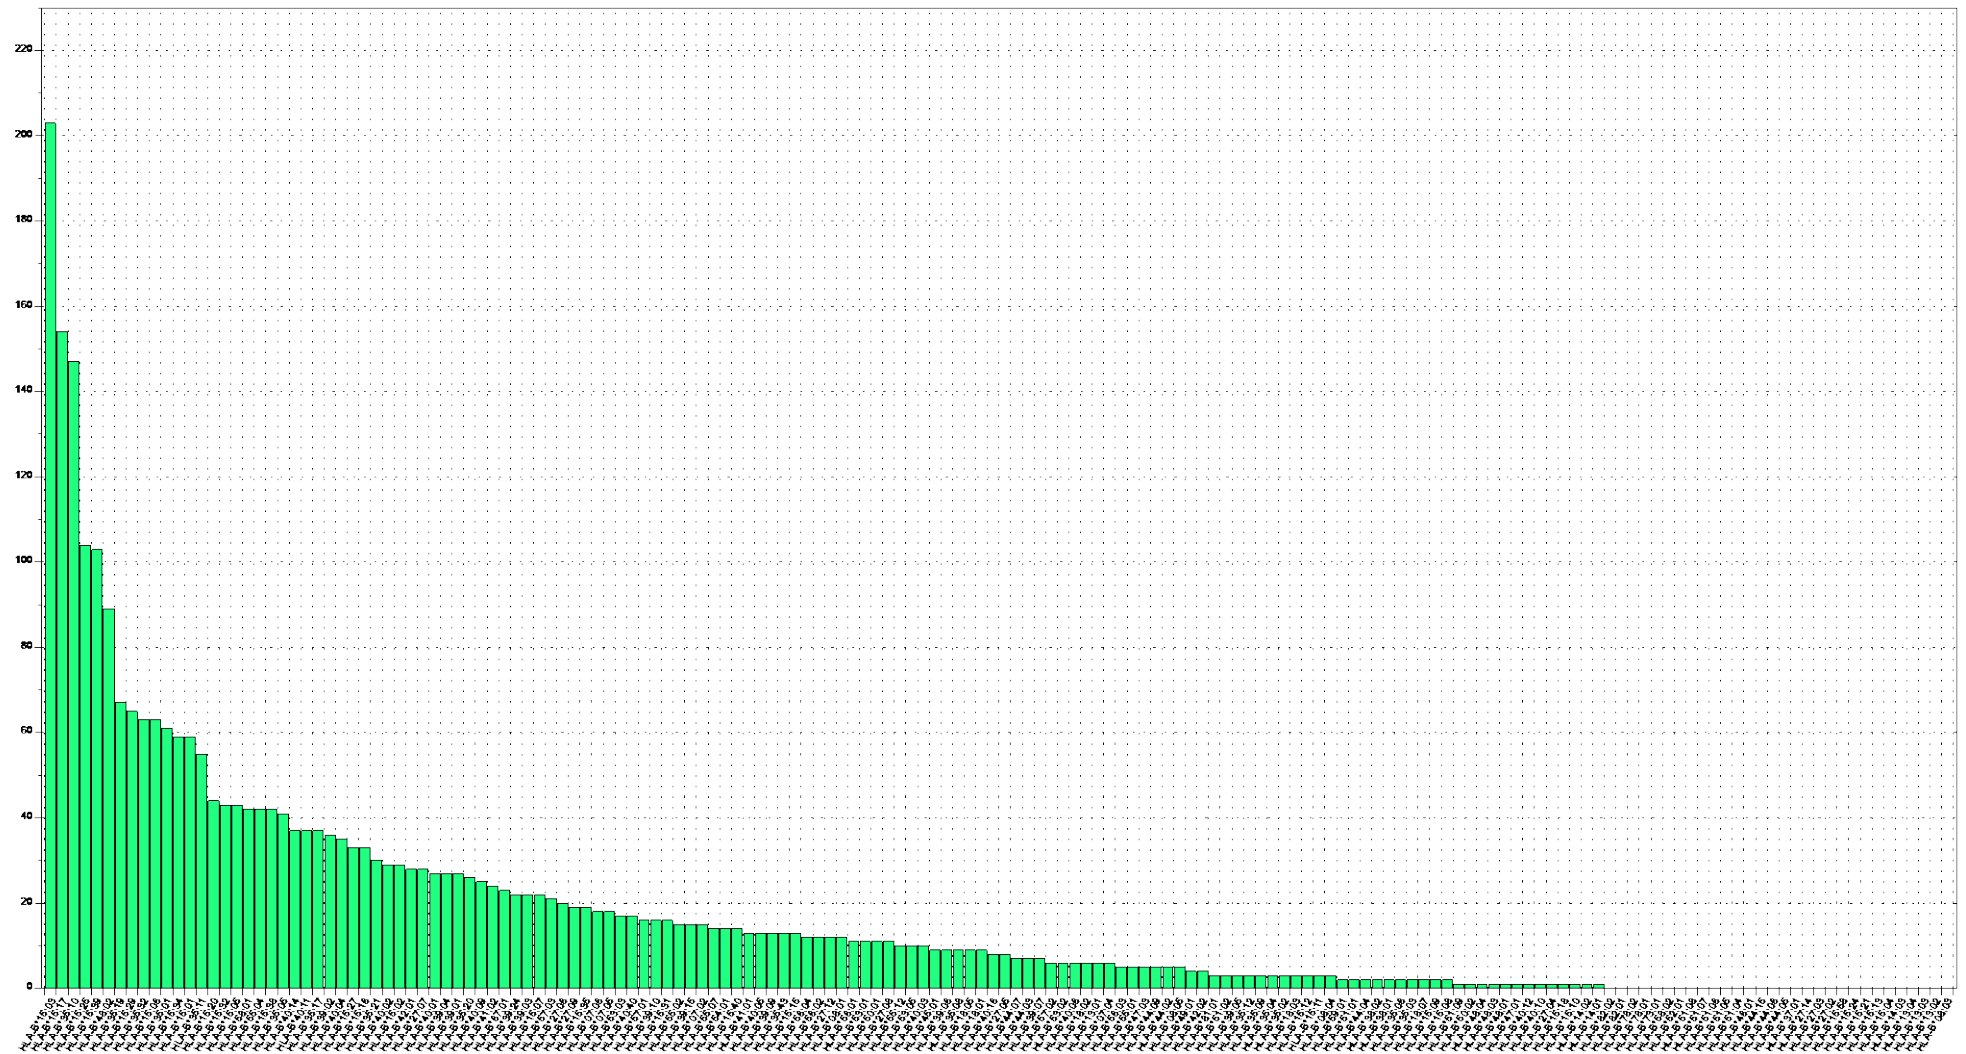

Alleles are ordered on the x-axis by their strong ( $IC_{50} \leq 50$  nM) binding prediction and the number of peptides presented are displayed on the y-axis.

## HLA-B alleles ordered by number of presented peptides with regular binding prediction

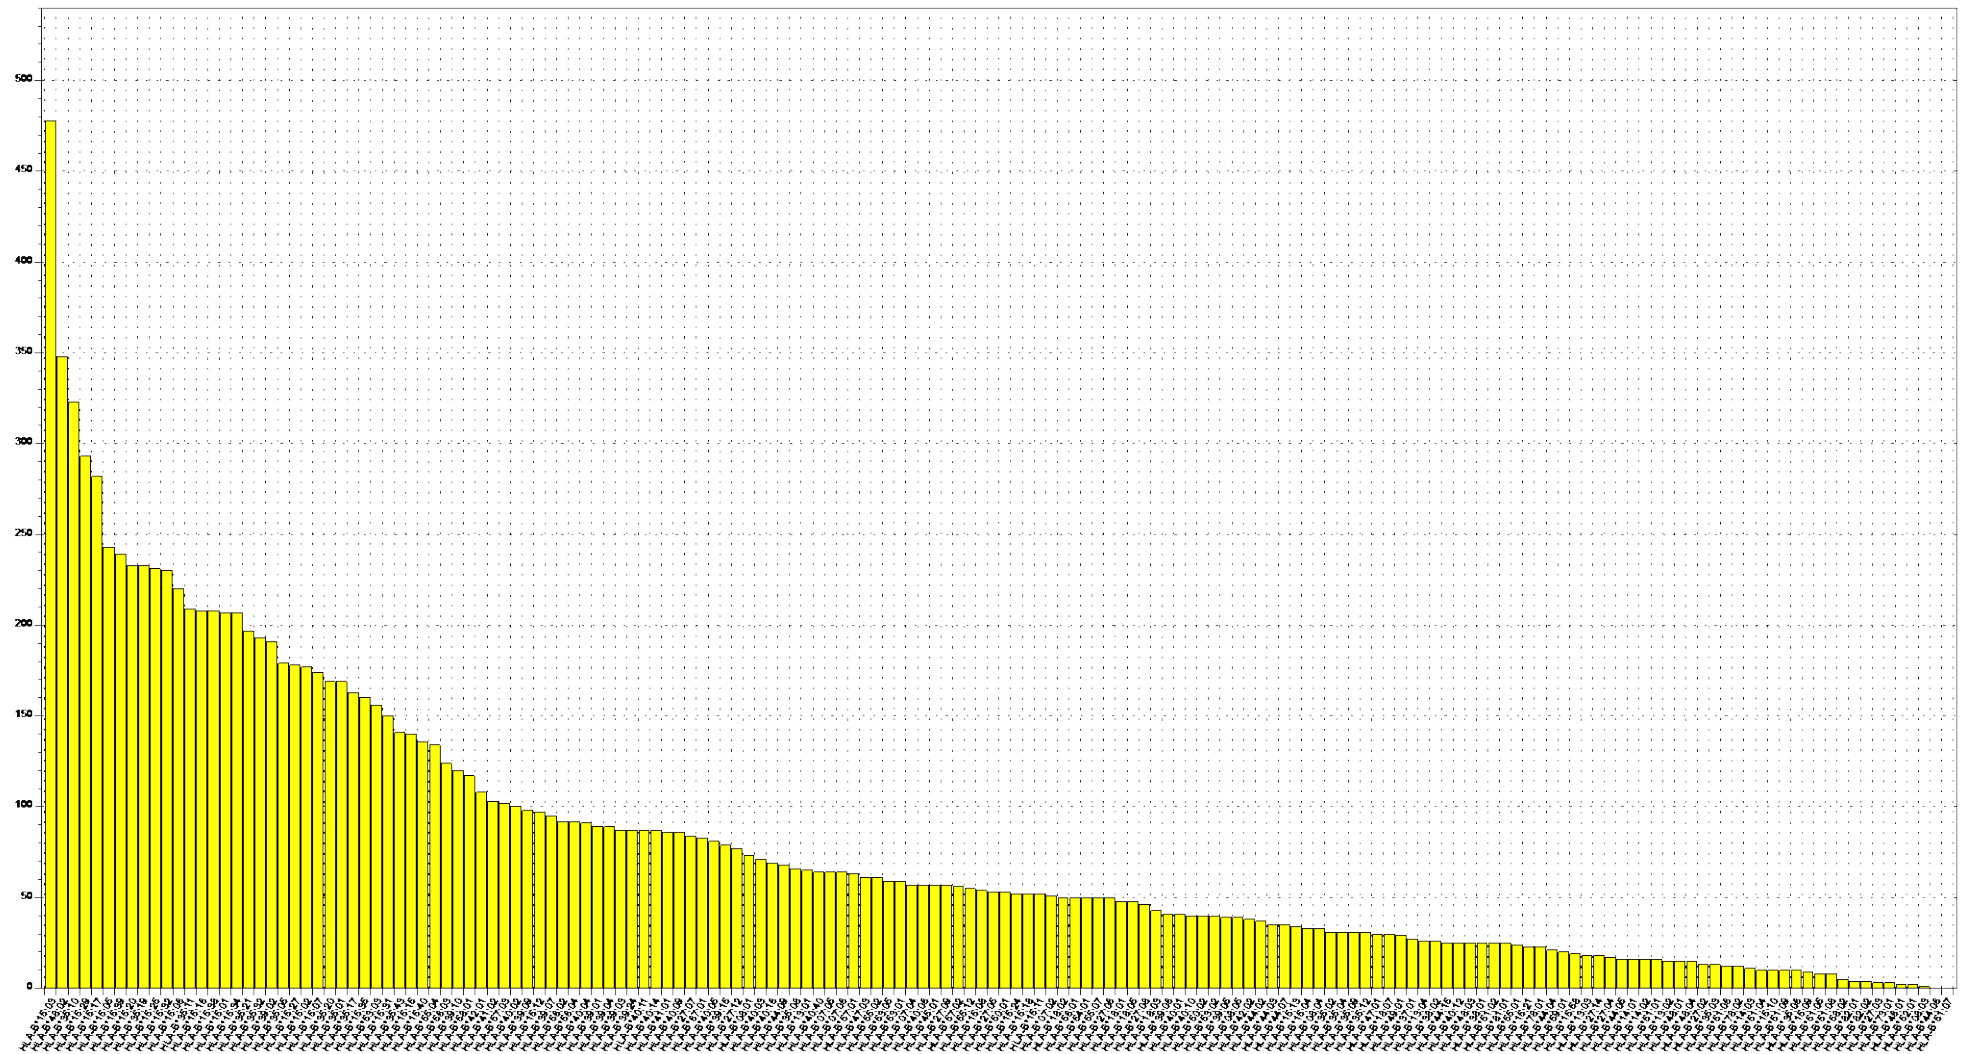

Alleles are ordered on the x-axis by their regular ( $50 \text{ nM} < IC_{50} \leq 500 \text{ nM}$ ) binding prediction and the number of peptides presented are displayed on the y-axis.

## HLA-B alleles ordered by number of presented peptides with weak binding prediction

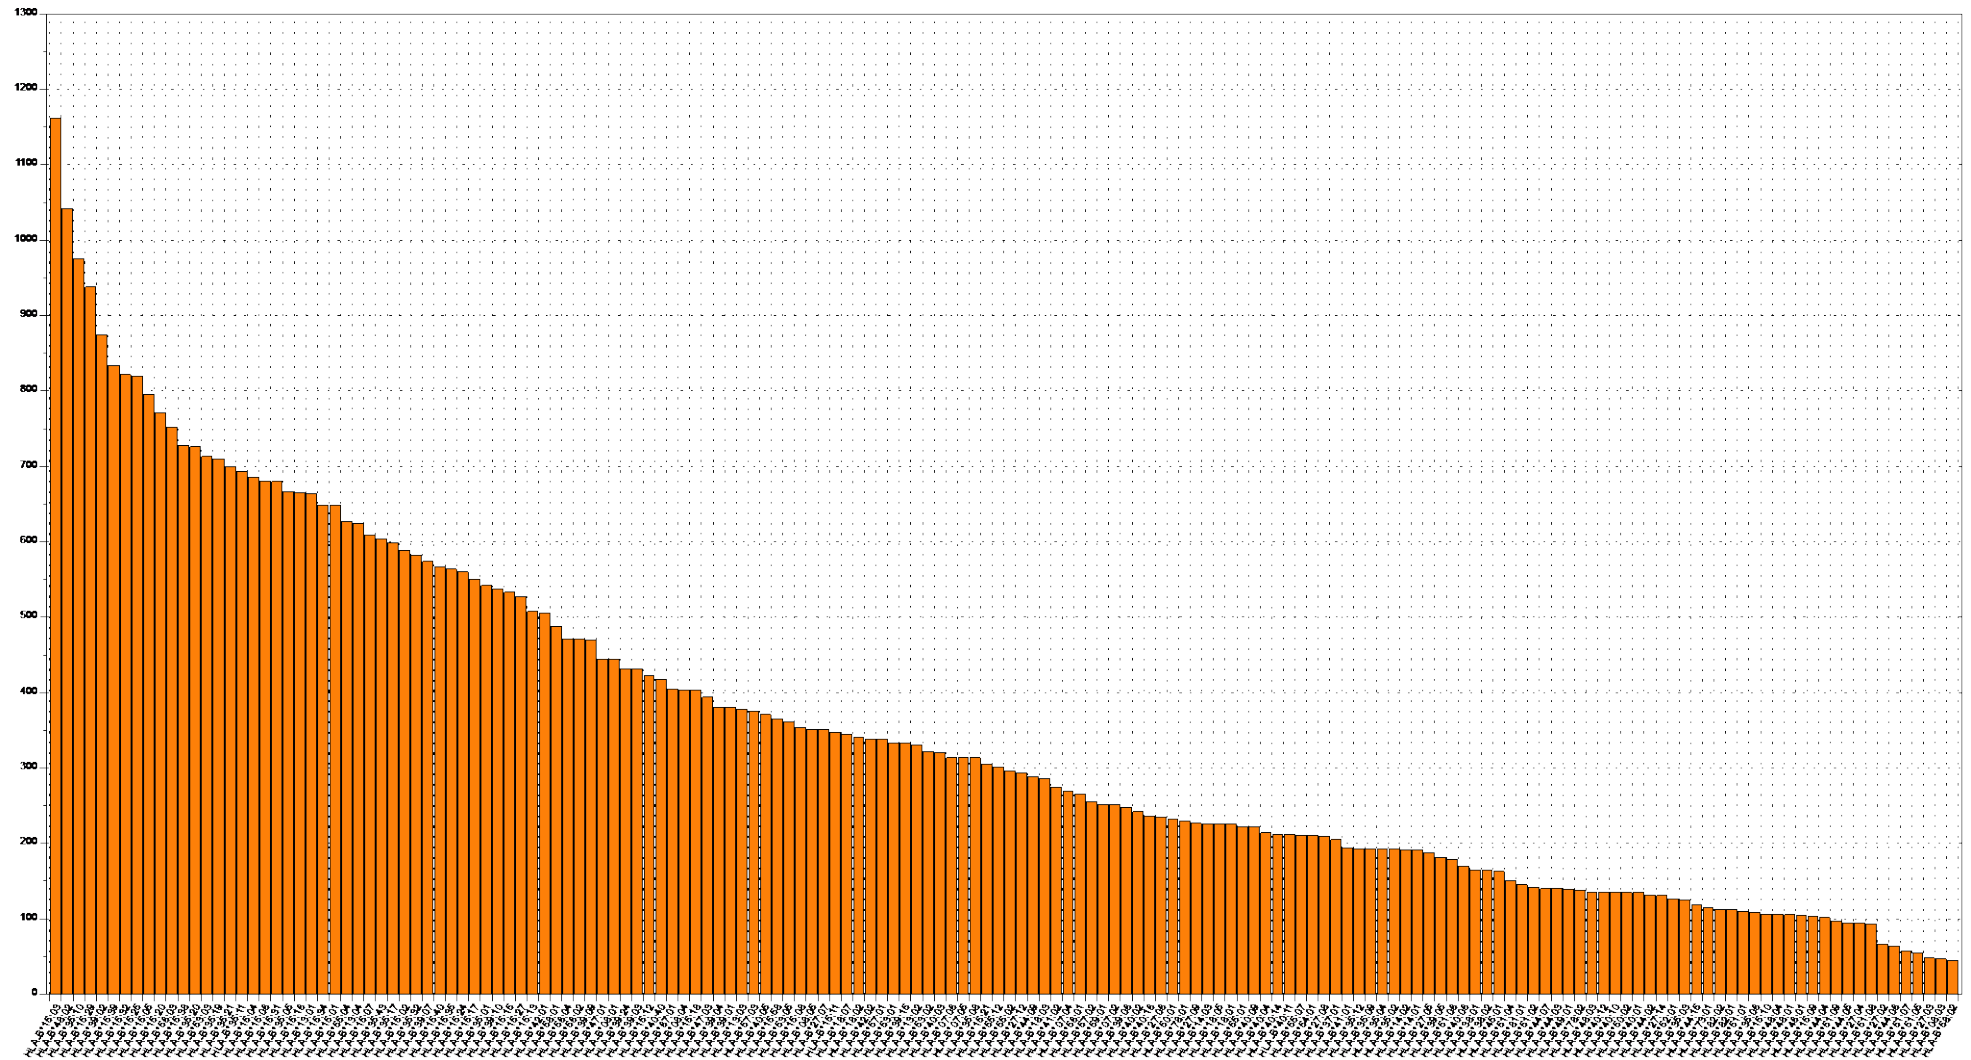

Alleles are ordered on the x-axis by their weak ( $500 \text{ nM} < IC_{50} \leq 5000 \text{ nM}$ ) binding prediction and the number of peptides presented are displayed on the y-axis.

## Total number of peptides with strong, regular and weak binding predictions for *HLA-C*

|             | <b>IC<sub>50</sub> ≤ 50 nM</b><br>Strong binders | <b>50 nM &lt; IC<sub>50</sub> ≤ 500 nM</b><br>Regular binders | <b>500 nM &lt; IC<sub>50</sub> ≤ 5000 nM</b><br>Weak binders | <b>IC<sub>50</sub> &gt; 5000 nM</b><br>Non binders |
|-------------|--------------------------------------------------|---------------------------------------------------------------|--------------------------------------------------------------|----------------------------------------------------|
| HLA-C*01:02 | 0                                                | 5                                                             | 210                                                          | 6874                                               |
| HLA-C*01:03 | 0                                                | 0                                                             | 28                                                           | 7061                                               |
| HLA-C*02:02 | 5                                                | 127                                                           | 880                                                          | 6077                                               |
| HLA-C*02:10 | 5                                                | 127                                                           | 880                                                          | 6077                                               |
| HLA-C*03:02 | 99                                               | 366                                                           | 1023                                                         | 5601                                               |
| HLA-C*03:03 | 74                                               | 225                                                           | 661                                                          | 6129                                               |
| HLA-C*03:04 | 74                                               | 225                                                           | 661                                                          | 6129                                               |
| HLA-C*03:05 | 39                                               | 180                                                           | 630                                                          | 6240                                               |
| HLA-C*03:07 | 39                                               | 238                                                           | 726                                                          | 6086                                               |
| HLA-C*04:01 | 0                                                | 4                                                             | 55                                                           | 7030                                               |
| HLA-C*04:03 | 3                                                | 18                                                            | 126                                                          | 6942                                               |
| HLA-C*04:04 | 0                                                | 1                                                             | 106                                                          | 6982                                               |
| HLA-C*04:05 | 0                                                | 4                                                             | 55                                                           | 7030                                               |
| HLA-C*04:06 | 2                                                | 18                                                            | 244                                                          | 6825                                               |
| HLA-C*04:07 | 0                                                | 4                                                             | 55                                                           | 7030                                               |
| HLA-C*05:01 | 18                                               | 43                                                            | 259                                                          | 6769                                               |
| HLA-C*06:02 | 3                                                | 39                                                            | 322                                                          | 6725                                               |
| HLA-C*06:04 | 5                                                | 82                                                            | 667                                                          | 6335                                               |
| HLA-C*06:06 | 1                                                | 78                                                            | 829                                                          | 6181                                               |
| HLA-C*07:01 | 3                                                | 41                                                            | 379                                                          | 6666                                               |
| HLA-C*07:02 | 8                                                | 111                                                           | 614                                                          | 6356                                               |
| HLA-C*07:03 | 6                                                | 126                                                           | 814                                                          | 6143                                               |
| HLA-C*07:04 | 0                                                | 0                                                             | 113                                                          | 6976                                               |
| HLA-C*07:05 | 6                                                | 78                                                            | 603                                                          | 6402                                               |
| HLA-C*07:06 | 3                                                | 41                                                            | 379                                                          | 6666                                               |
| HLA-C*07:07 | 0                                                | 13                                                            | 198                                                          | 6878                                               |
| HLA-C*07:08 | 1                                                | 26                                                            | 272                                                          | 6790                                               |
| HLA-C*07:10 | 5                                                | 100                                                           | 633                                                          | 6351                                               |
| HLA-C*07:11 | 0                                                | 0                                                             | 113                                                          | 6976                                               |
| HLA-C*07:18 | 3                                                | 41                                                            | 379                                                          | 6666                                               |
| HLA-C*08:01 | 5                                                | 70                                                            | 403                                                          | 6611                                               |
| HLA-C*08:02 | 2                                                | 26                                                            | 157                                                          | 6904                                               |
| HLA-C*08:03 | 5                                                | 70                                                            | 403                                                          | 6611                                               |
| HLA-C*08:04 | 3                                                | 75                                                            | 427                                                          | 6584                                               |
| HLA-C*12:02 | 24                                               | 211                                                           | 1010                                                         | 5844                                               |
| HLA-C*12:03 | 77                                               | 448                                                           | 1160                                                         | 5404                                               |
| HLA-C*12:04 | 24                                               | 281                                                           | 1091                                                         | 5693                                               |
| HLA-C*12:05 | 21                                               | 267                                                           | 1048                                                         | 5753                                               |
| HLA-C*14:02 | 80                                               | 342                                                           | 1206                                                         | 5461                                               |
| HLA-C*14:03 | 80                                               | 342                                                           | 1206                                                         | 5461                                               |
| HLA-C*15:02 | 17                                               | 164                                                           | 633                                                          | 6275                                               |
| HLA-C*15:03 | 12                                               | 162                                                           | 666                                                          | 6249                                               |
| HLA-C*15:04 | 20                                               | 286                                                           | 1020                                                         | 5763                                               |
| HLA-C*15:05 | 6                                                | 109                                                           | 528                                                          | 6446                                               |
| HLA-C*15:06 | 30                                               | 229                                                           | 720                                                          | 6110                                               |
| HLA-C*15:07 | 13                                               | 181                                                           | 663                                                          | 6232                                               |
| HLA-C*15:08 | 10                                               | 80                                                            | 523                                                          | 6476                                               |
| HLA-C*15:13 | 17                                               | 164                                                           | 633                                                          | 6275                                               |
| HLA-C*16:01 | 60                                               | 391                                                           | 1073                                                         | 5565                                               |
| HLA-C*16:02 | 6                                                | 181                                                           | 937                                                          | 5965                                               |
| HLA-C*16:04 | 48                                               | 321                                                           | 1107                                                         | 5613                                               |
| HLA-C*17:01 | 8                                                | 110                                                           | 824                                                          | 6147                                               |
| HLA-C*17:03 | 4                                                | 55                                                            | 412                                                          | 6618                                               |
| HLA-C*18:01 | 0                                                | 0                                                             | 18                                                           | 7071                                               |
| HLA-C*18:02 | 0                                                | 0                                                             | 18                                                           | 7071                                               |

Alleles are ordered alphabetically.

## General binding prediction tendencies for HLA-C

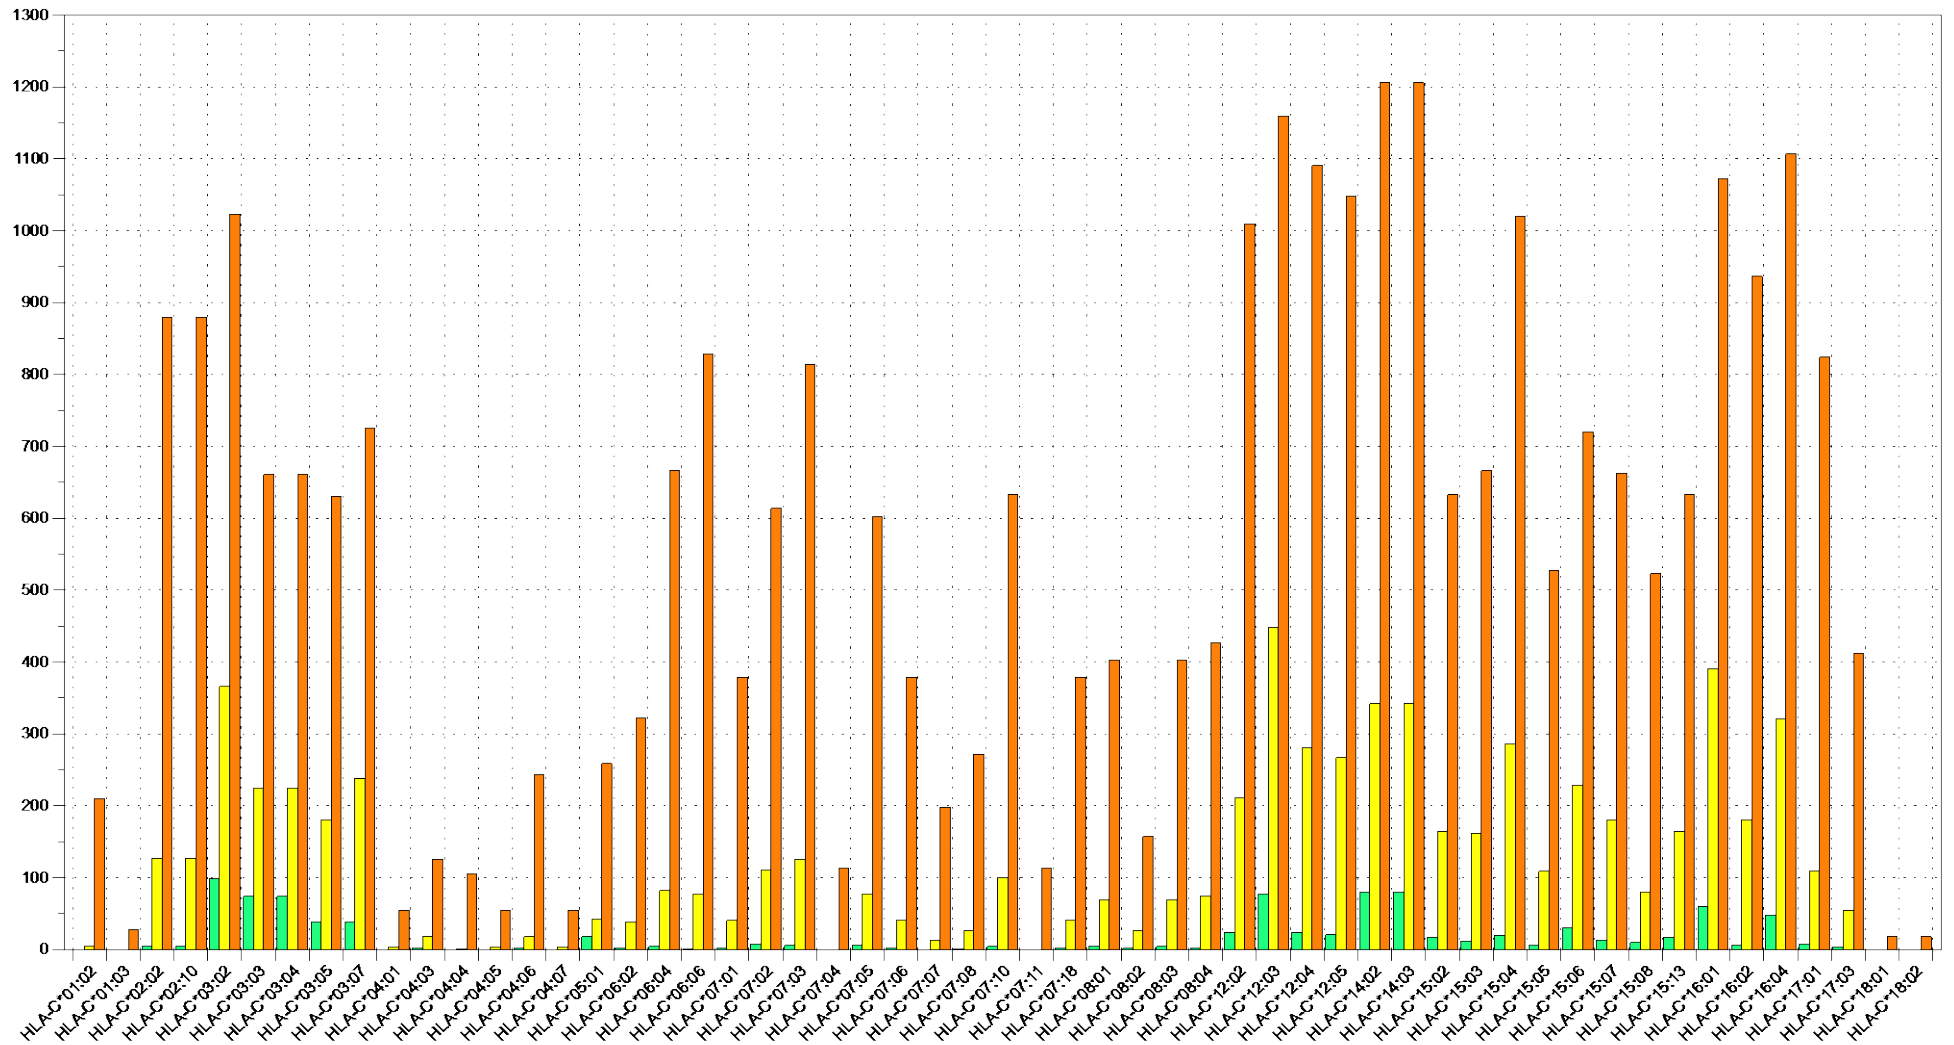

Alleles are ordered alphabetically on the x-axis, while the number of peptides binding with strong ( $IC_{50} \leq 50$  nM), regular ( $50$  nM  $< IC_{50} \leq 500$  nM) and weak ( $500$  nM  $< IC_{50} \leq 5000$  nM) binding prediction are displayed on the y-axis.



## HLA-C alleles ordered by number of presented peptides with strong binding prediction

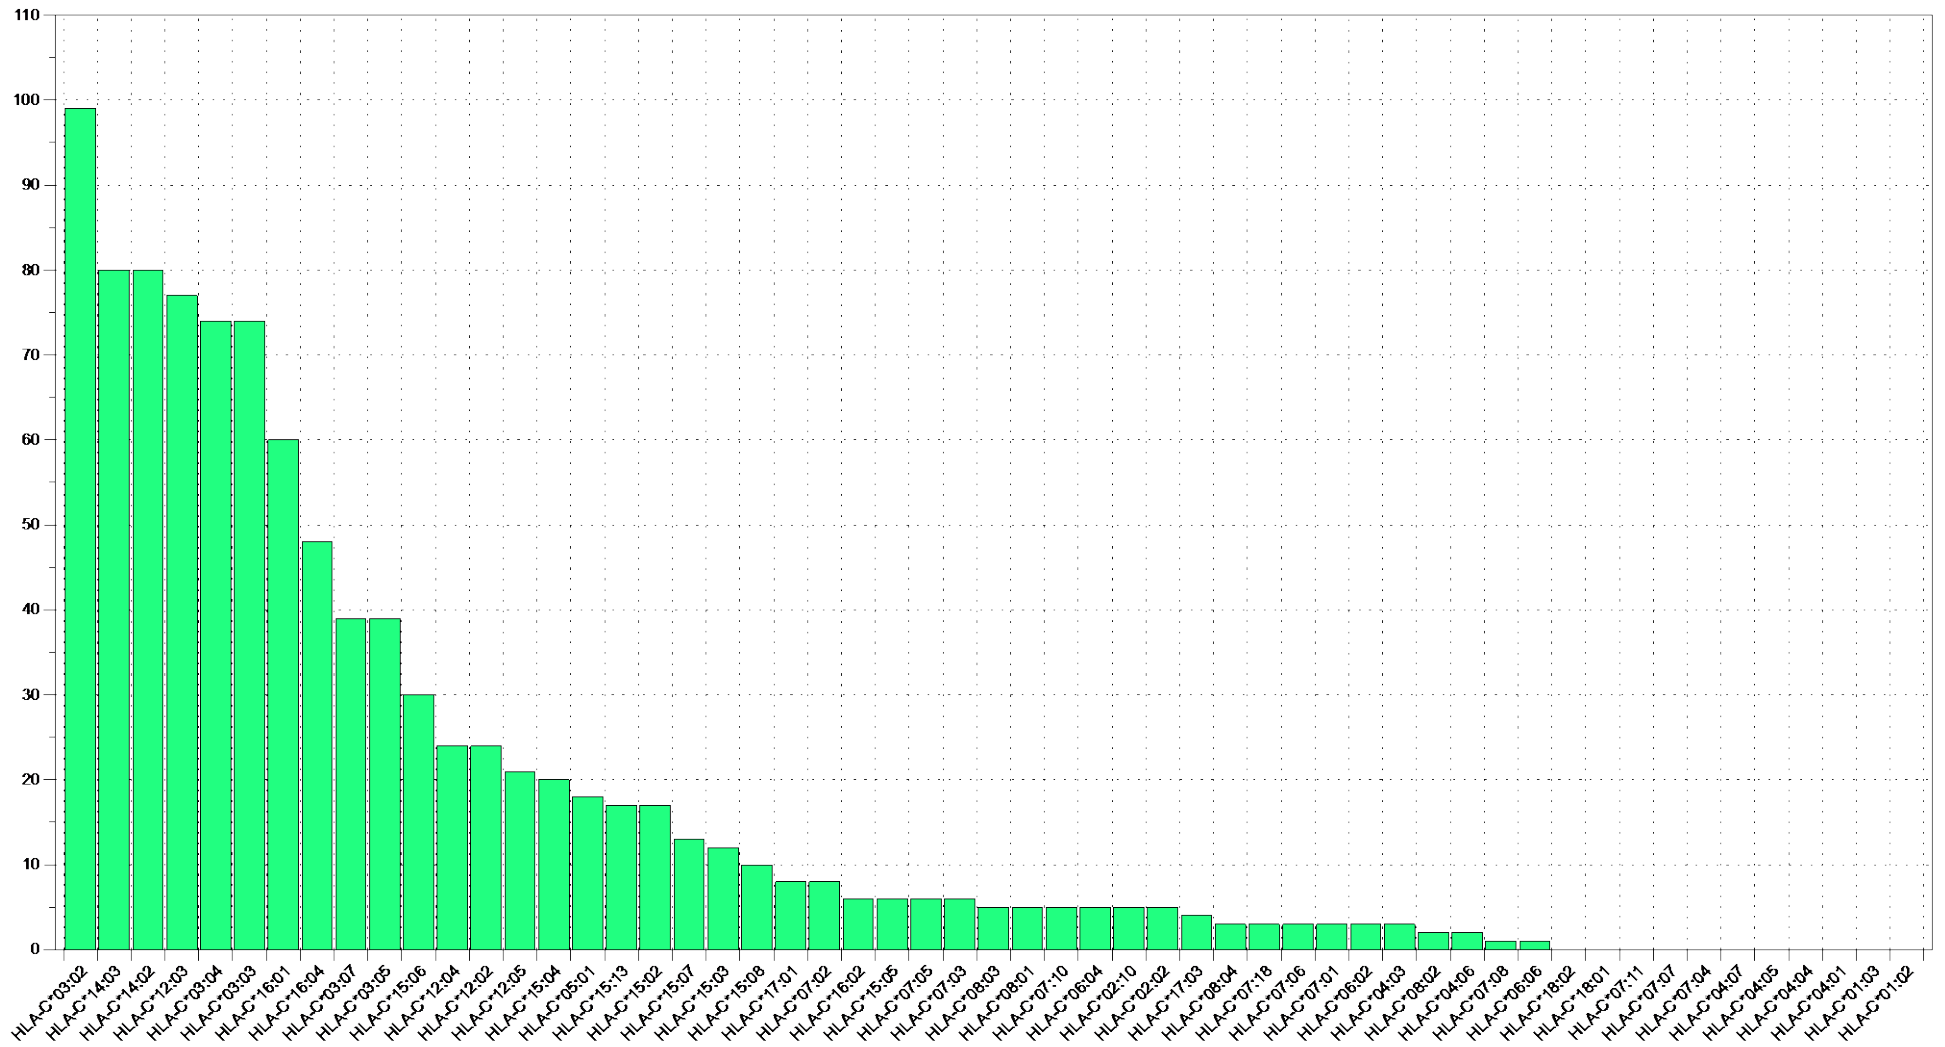

Alleles are ordered on the x-axis by their strong ( $IC_{50} \leq 50$  nM) binding prediction and the number of peptides presented are displayed on the y-axis.

## HLA-C alleles ordered by number of presented peptides with regular binding prediction

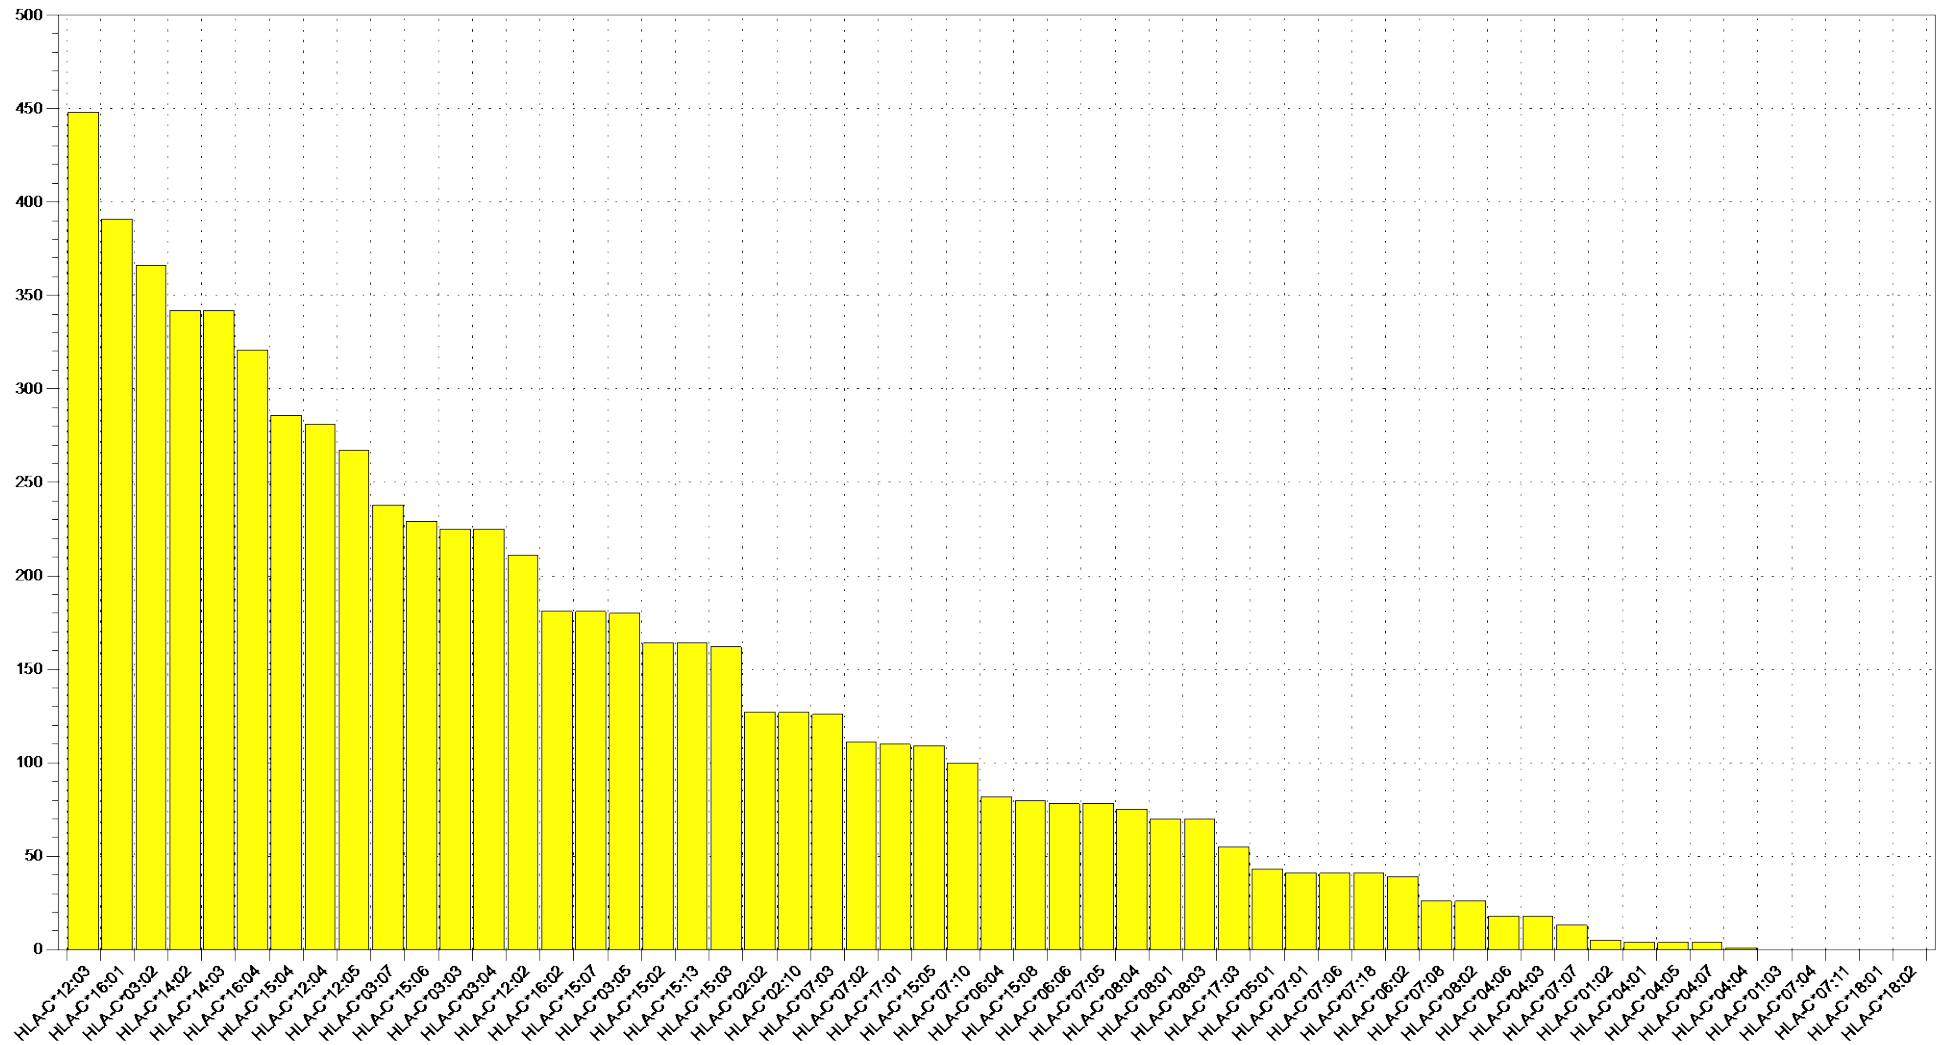

Alleles are ordered on the x-axis by their regular ( $50 \text{ nM} < IC_{50} \leq 500 \text{ nM}$ ) binding prediction and the number of peptides presented are displayed on the y-axis.

## HLA-C alleles ordered by number of presented peptides with weak binding prediction

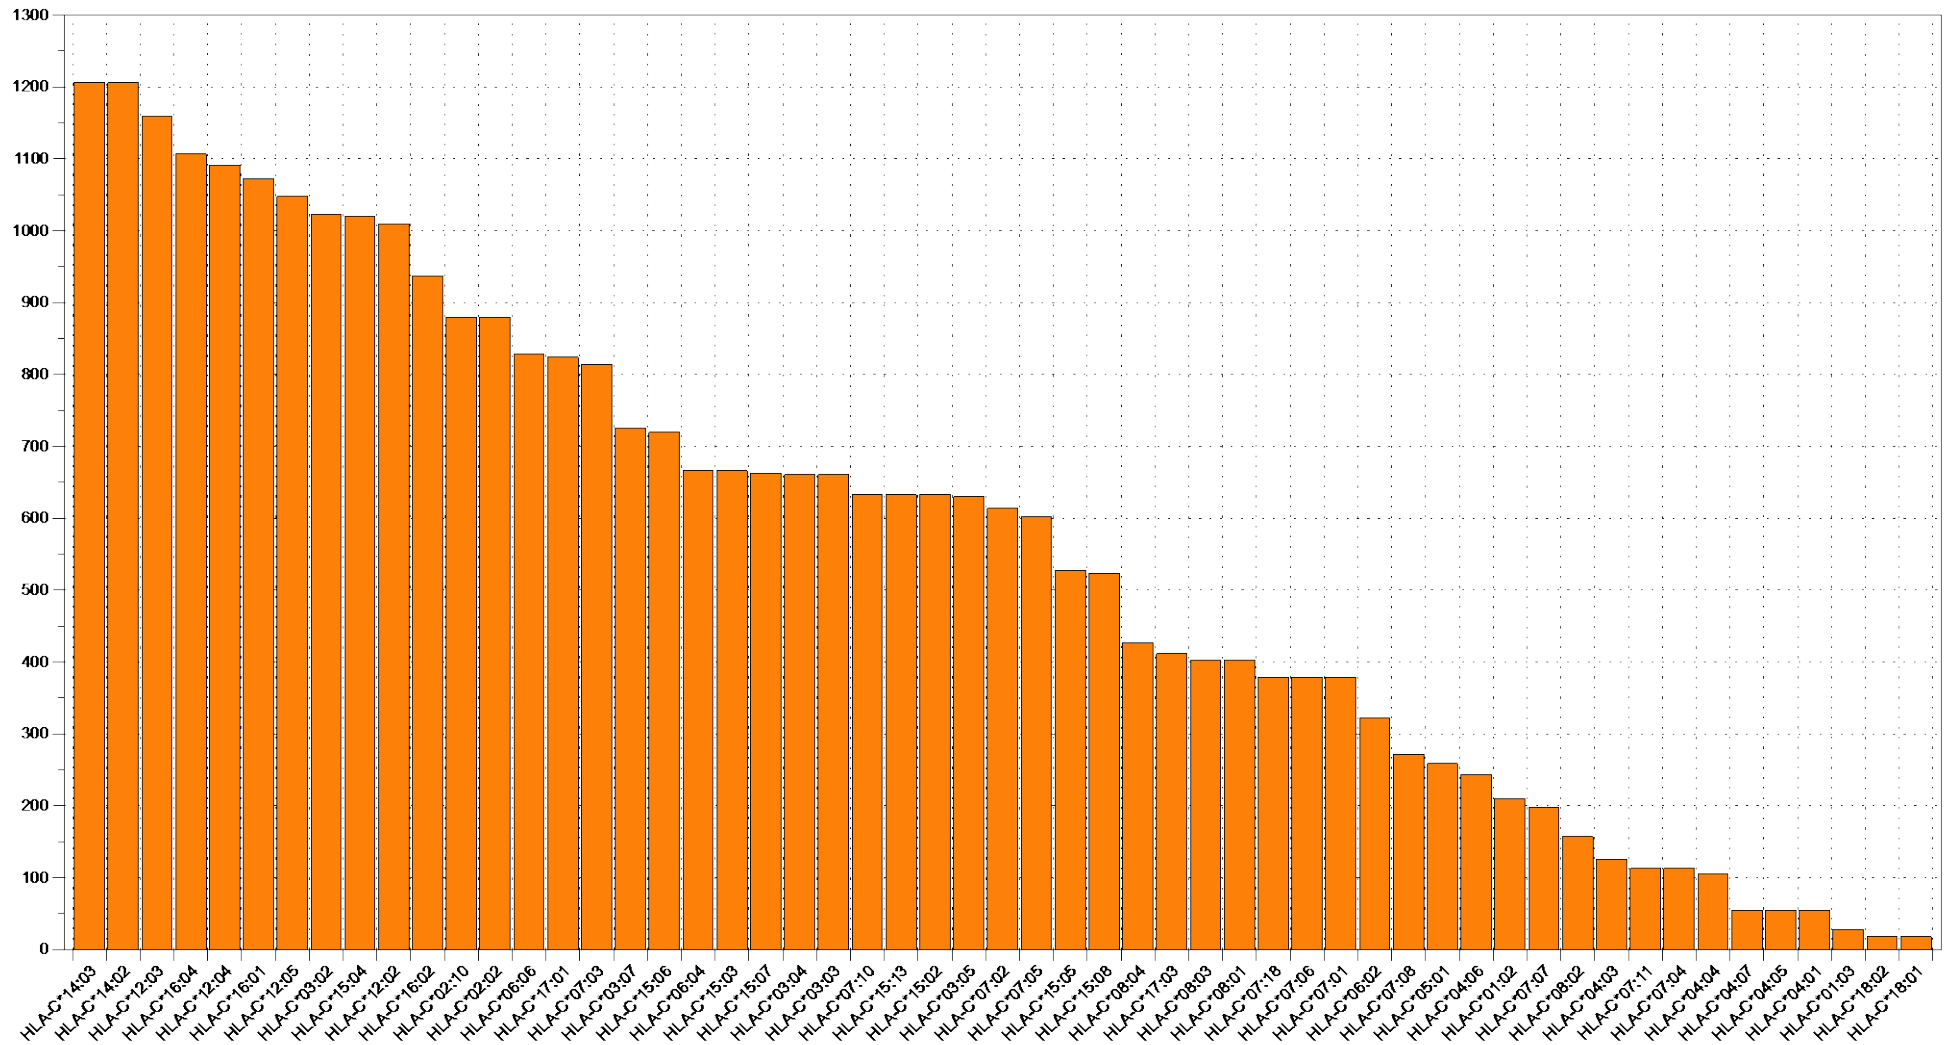

Alleles are ordered on the x-axis by their weak ( $500 \text{ nM} < \text{IC}_{50} \leq 5000 \text{ nM}$ ) binding prediction and the number of peptides presented are displayed on the y-axis.

## Total number of peptides with strong, regular and weak binding predictions for *HLA-DRB1*

|                | <b>IC<sub>50</sub> ≤ 50 nM</b><br>Strong binders | <b>50 nM &lt; IC<sub>50</sub> ≤ 1000 nM</b><br>Regular binders | <b>1000 nM &lt; IC<sub>50</sub> ≤ 5000 nM</b><br>Weak binders | <b>IC<sub>50</sub> &gt; 5000 nM</b><br>Non binders |
|----------------|--------------------------------------------------|----------------------------------------------------------------|---------------------------------------------------------------|----------------------------------------------------|
| HLA-DRB1*01:01 | 719                                              | 3855                                                           | 1827                                                          | 683                                                |
| HLA-DRB1*01:02 | 14                                               | 1799                                                           | 3180                                                          | 2091                                               |
| HLA-DRB1*01:03 | 0                                                | 537                                                            | 2284                                                          | 4263                                               |
| HLA-DRB1*01:04 | 185                                              | 3541                                                           | 2389                                                          | 969                                                |
| HLA-DRB1*03:01 | 0                                                | 818                                                            | 2779                                                          | 3487                                               |
| HLA-DRB1*03:02 | 0                                                | 2                                                              | 197                                                           | 6885                                               |
| HLA-DRB1*03:03 | 0                                                | 28                                                             | 841                                                           | 6215                                               |
| HLA-DRB1*03:04 | 0                                                | 818                                                            | 2779                                                          | 3487                                               |
| HLA-DRB1*03:05 | 0                                                | 398                                                            | 1987                                                          | 4699                                               |
| HLA-DRB1*03:06 | 0                                                | 518                                                            | 2652                                                          | 3914                                               |
| HLA-DRB1*03:07 | 0                                                | 380                                                            | 2073                                                          | 4631                                               |
| HLA-DRB1*03:08 | 0                                                | 818                                                            | 2779                                                          | 3487                                               |
| HLA-DRB1*04:01 | 17                                               | 2311                                                           | 3194                                                          | 1562                                               |
| HLA-DRB1*04:02 | 0                                                | 1105                                                           | 3060                                                          | 2919                                               |
| HLA-DRB1*04:03 | 0                                                | 893                                                            | 3052                                                          | 3139                                               |
| HLA-DRB1*04:04 | 78                                               | 4892                                                           | 5614                                                          | -3500                                              |
| HLA-DRB1*04:05 | 6                                                | 2152                                                           | 3055                                                          | 1871                                               |
| HLA-DRB1*04:06 | 0                                                | 893                                                            | 3052                                                          | 3139                                               |
| HLA-DRB1*04:07 | 0                                                | 564                                                            | 2673                                                          | 3847                                               |
| HLA-DRB1*04:08 | 11                                               | 1917                                                           | 3161                                                          | 1995                                               |
| HLA-DRB1*04:10 | 9                                                | 2178                                                           | 2977                                                          | 1920                                               |
| HLA-DRB1*04:11 | 0                                                | 947                                                            | 3252                                                          | 2885                                               |
| HLA-DRB1*04:13 | 23                                               | 2871                                                           | 2915                                                          | 1275                                               |
| HLA-DRB1*04:15 | 1                                                | 281                                                            | 1757                                                          | 5045                                               |
| HLA-DRB1*04:17 | 0                                                | 733                                                            | 3000                                                          | 3351                                               |
| HLA-DRB1*07:01 | 91                                               | 2755                                                           | 2639                                                          | 1599                                               |
| HLA-DRB1*08:01 | 1                                                | 1195                                                           | 3113                                                          | 2775                                               |
| HLA-DRB1*08:02 | 0                                                | 966                                                            | 3266                                                          | 2852                                               |
| HLA-DRB1*08:03 | 0                                                | 334                                                            | 2924                                                          | 3826                                               |
| HLA-DRB1*08:04 | 0                                                | 1022                                                           | 2973                                                          | 3089                                               |
| HLA-DRB1*08:05 | 18                                               | 1226                                                           | 2862                                                          | 2978                                               |
| HLA-DRB1*08:06 | 4                                                | 852                                                            | 2854                                                          | 3374                                               |
| HLA-DRB1*08:07 | 0                                                | 2119                                                           | 3213                                                          | 1752                                               |
| HLA-DRB1*08:09 | 0                                                | 966                                                            | 3266                                                          | 2852                                               |
| HLA-DRB1*08:10 | 0                                                | 874                                                            | 3184                                                          | 3026                                               |
| HLA-DRB1*08:11 | 0                                                | 2042                                                           | 3234                                                          | 1808                                               |
| HLA-DRB1*08:12 | 0                                                | 245                                                            | 2721                                                          | 4118                                               |
| HLA-DRB1*09:01 | 23                                               | 2770                                                           | 2963                                                          | 1328                                               |
| HLA-DRB1*10:01 | 358                                              | 3761                                                           | 2164                                                          | 801                                                |
| HLA-DRB1*11:01 | 72                                               | 1547                                                           | 2570                                                          | 2895                                               |
| HLA-DRB1*11:02 | 169                                              | 2800                                                           | 2541                                                          | 1574                                               |
| HLA-DRB1*11:03 | 68                                               | 1689                                                           | 3133                                                          | 2194                                               |
| HLA-DRB1*11:04 | 40                                               | 1151                                                           | 2774                                                          | 3119                                               |
| HLA-DRB1*11:05 | 20                                               | 1651                                                           | 2998                                                          | 2415                                               |
| HLA-DRB1*11:06 | 5                                                | 595                                                            | 2251                                                          | 4233                                               |
| HLA-DRB1*11:08 | 13                                               | 2756                                                           | 2846                                                          | 1469                                               |
| HLA-DRB1*11:09 | 72                                               | 1547                                                           | 2570                                                          | 2895                                               |
| HLA-DRB1*11:10 | 72                                               | 1547                                                           | 2570                                                          | 2895                                               |
| HLA-DRB1*11:11 | 56                                               | 1939                                                           | 2886                                                          | 2203                                               |
| HLA-DRB1*11:12 | 72                                               | 1547                                                           | 2570                                                          | 2895                                               |
| HLA-DRB1*11:14 | 82                                               | 2210                                                           | 2725                                                          | 2067                                               |
| HLA-DRB1*11:15 | 72                                               | 1547                                                           | 2570                                                          | 2895                                               |
| HLA-DRB1*11:19 | 3                                                | 1483                                                           | 3100                                                          | 2498                                               |
| HLA-DRB1*11:28 | 72                                               | 1547                                                           | 2570                                                          | 2895                                               |
| HLA-DRB1*12:01 | 0                                                | 839                                                            | 2663                                                          | 3582                                               |
| HLA-DRB1*12:02 | 0                                                | 307                                                            | 1989                                                          | 4788                                               |
| HLA-DRB1*12:03 | 6                                                | 1489                                                           | 2935                                                          | 2654                                               |
| HLA-DRB1*13:01 | 169                                              | 2800                                                           | 2541                                                          | 1574                                               |
| HLA-DRB1*13:02 | 82                                               | 2210                                                           | 2725                                                          | 2067                                               |
| HLA-DRB1*13:03 | 0                                                | 1166                                                           | 3547                                                          | 2371                                               |
| HLA-DRB1*13:04 | 92                                               | 2459                                                           | 2809                                                          | 1724                                               |
| HLA-DRB1*13:05 | 72                                               | 1547                                                           | 2570                                                          | 2895                                               |

|                | <b>IC<sub>50</sub> ≤ 50 nM</b><br><b>Strong binders</b> | <b>50 nM &lt; IC<sub>50</sub> ≤ 1000 nM</b><br><b>Regular binders</b> | <b>1000 nM &lt; IC<sub>50</sub> ≤ 5000 nM</b><br><b>Weak binders</b> | <b>IC<sub>50</sub> &gt; 5000 nM</b><br><b>Non binders</b> |
|----------------|---------------------------------------------------------|-----------------------------------------------------------------------|----------------------------------------------------------------------|-----------------------------------------------------------|
| HLA-DRB1*13:06 | 32                                                      | 1837                                                                  | 2902                                                                 | 2313                                                      |
| HLA-DRB1*13:07 | 29                                                      | 1223                                                                  | 2613                                                                 | 3219                                                      |
| HLA-DRB1*13:08 | 77                                                      | 2502                                                                  | 2816                                                                 | 1689                                                      |
| HLA-DRB1*13:10 | 0                                                       | 645                                                                   | 3198                                                                 | 3241                                                      |
| HLA-DRB1*13:11 | 40                                                      | 1151                                                                  | 2774                                                                 | 3119                                                      |
| HLA-DRB1*13:12 | 0                                                       | 1288                                                                  | 3350                                                                 | 2446                                                      |
| HLA-DRB1*13:22 | 169                                                     | 2800                                                                  | 2541                                                                 | 1574                                                      |
| HLA-DRB1*14:01 | 0                                                       | 2700                                                                  | 3263                                                                 | 1121                                                      |
| HLA-DRB1*14:02 | 0                                                       | 1498                                                                  | 3508                                                                 | 2078                                                      |
| HLA-DRB1*14:03 | 0                                                       | 514                                                                   | 2966                                                                 | 3604                                                      |
| HLA-DRB1*14:04 | 0                                                       | 2155                                                                  | 3667                                                                 | 1262                                                      |
| HLA-DRB1*14:05 | 0                                                       | 1364                                                                  | 3640                                                                 | 2080                                                      |
| HLA-DRB1*14:06 | 5                                                       | 2385                                                                  | 3214                                                                 | 1480                                                      |
| HLA-DRB1*14:07 | 0                                                       | 1364                                                                  | 3917                                                                 | 1803                                                      |
| HLA-DRB1*14:08 | 0                                                       | 1364                                                                  | 3640                                                                 | 2080                                                      |
| HLA-DRB1*14:09 | 5                                                       | 2638                                                                  | 3259                                                                 | 1182                                                      |
| HLA-DRB1*14:10 | 0                                                       | 1288                                                                  | 3304                                                                 | 2492                                                      |
| HLA-DRB1*14:12 | 0                                                       | 1041                                                                  | 3269                                                                 | 2774                                                      |
| HLA-DRB1*14:13 | 0                                                       | 1486                                                                  | 3704                                                                 | 1894                                                      |
| HLA-DRB1*14:14 | 0                                                       | 667                                                                   | 3353                                                                 | 3064                                                      |
| HLA-DRB1*14:18 | 0                                                       | 586                                                                   | 3433                                                                 | 3065                                                      |
| HLA-DRB1*14:54 | 0                                                       | 2700                                                                  | 3263                                                                 | 1121                                                      |
| HLA-DRB1*15:01 | 19                                                      | 2001                                                                  | 2621                                                                 | 2443                                                      |
| HLA-DRB1*15:02 | 0                                                       | 1412                                                                  | 2943                                                                 | 2729                                                      |
| HLA-DRB1*15:03 | 0                                                       | 781                                                                   | 2440                                                                 | 3863                                                      |
| HLA-DRB1*15:04 | 32                                                      | 1187                                                                  | 2802                                                                 | 3063                                                      |
| HLA-DRB1*15:06 | 19                                                      | 2001                                                                  | 2621                                                                 | 2443                                                      |
| HLA-DRB1*15:11 | 0                                                       | 1189                                                                  | 2971                                                                 | 2924                                                      |
| HLA-DRB1*16:01 | 17                                                      | 1033                                                                  | 2724                                                                 | 3310                                                      |
| HLA-DRB1*16:02 | 21                                                      | 2281                                                                  | 3068                                                                 | 1714                                                      |
| HLA-DRB1*16:03 | 17                                                      | 1033                                                                  | 2724                                                                 | 3310                                                      |
| HLA-DRB1*16:05 | 0                                                       | 1264                                                                  | 2991                                                                 | 2829                                                      |

Alleles are ordered alphabetically.

## General binding prediction tendencies for *HLA-DRB1*

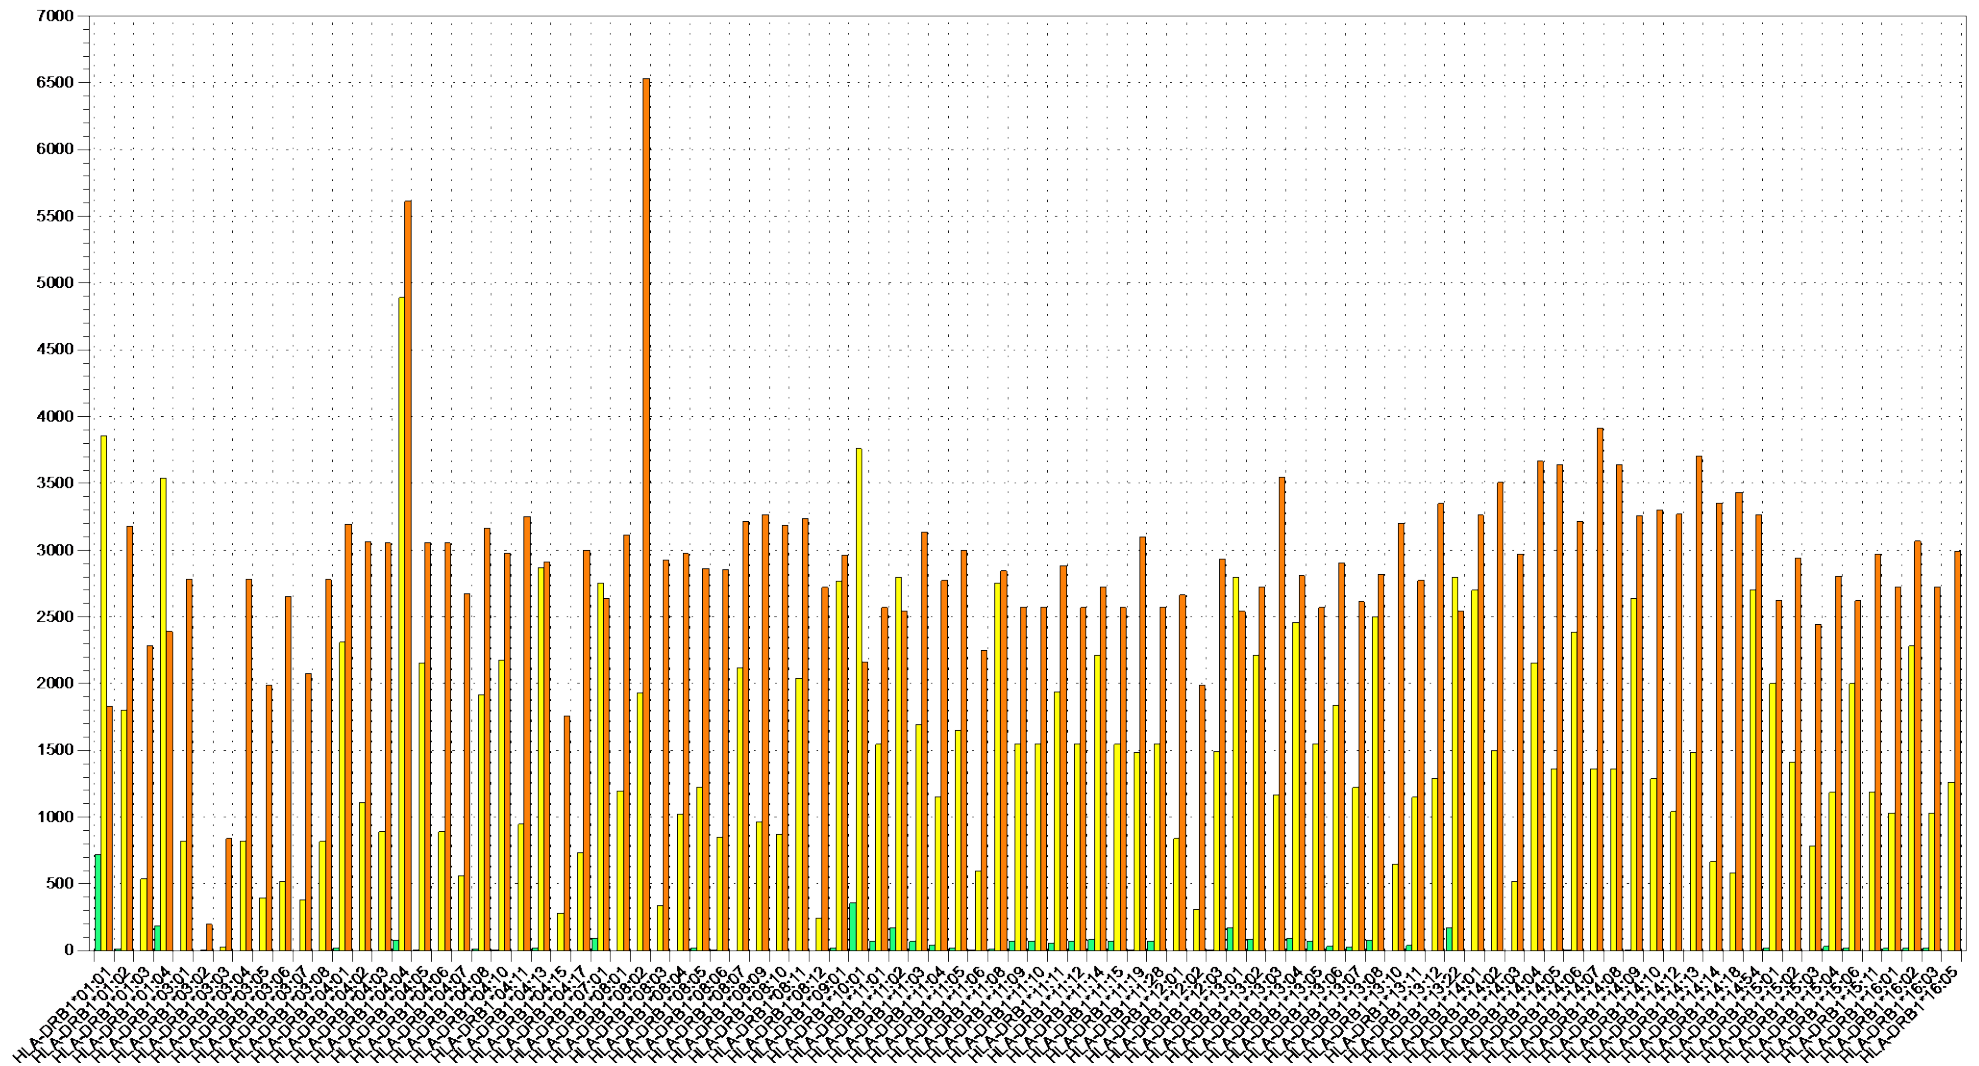

Alleles are ordered alphabetically on the x-axis, while the number of peptides binding with strong ( $IC_{50} \leq 50$  nM), regular ( $50$  nM  $< IC_{50} \leq 1000$  nM) and weak ( $1000$  nM  $< IC_{50} \leq 5000$  nM) binding prediction are displayed on the y-axis.



## HLA-DRB1 alleles ordered by number of presented peptides with regular binding prediction

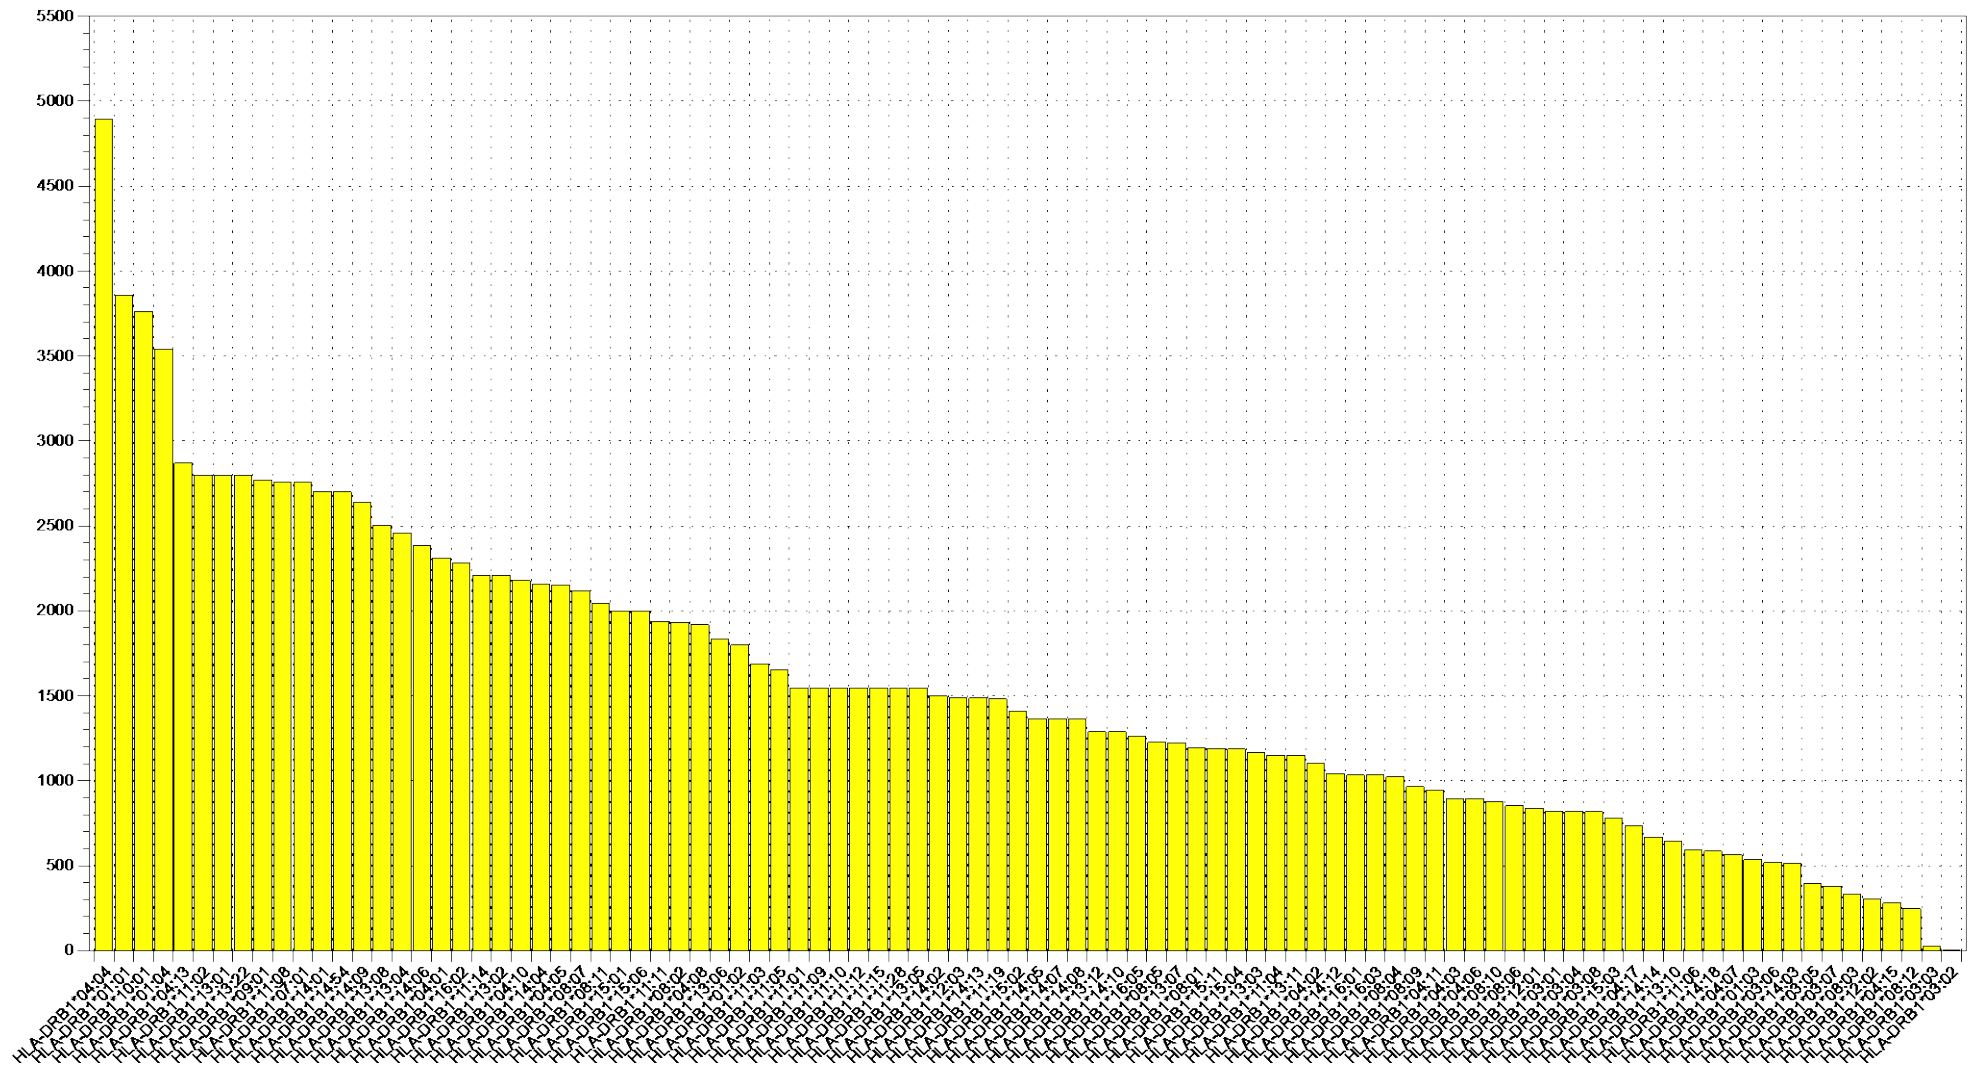

Alleles are ordered on the x-axis by their regular ( $50 \text{ nM} < IC_{50} \leq 1000 \text{ nM}$ ) binding prediction and the number of peptides presented are displayed on the y-axis.



## HLA-DRB1 alleles ordered by number of presented peptides with weak binding prediction

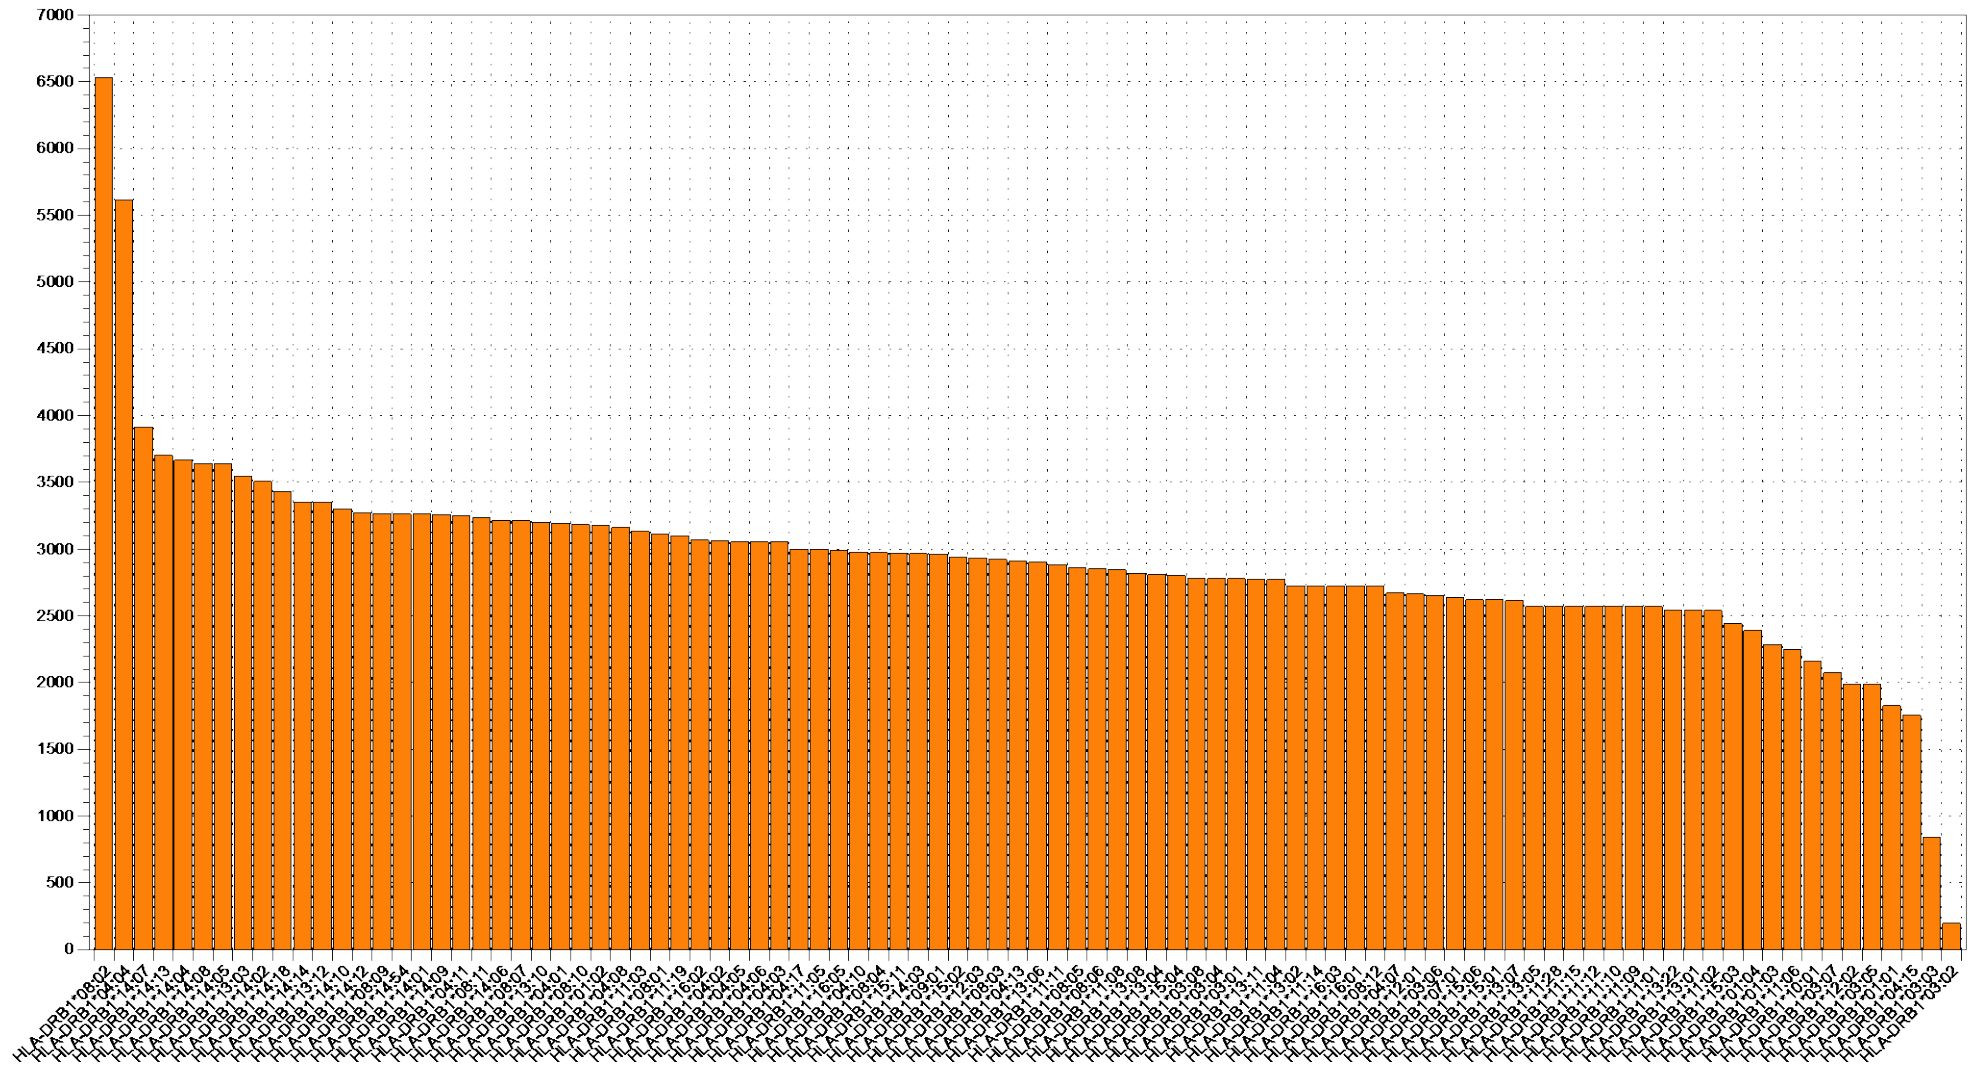

Alleles are ordered on the x-axis by their weak ( $1000 \text{ nM} < IC_{50} \leq 5000 \text{ nM}$ ) binding prediction and the number of peptides presented are displayed on the y-axis.

**Total number of peptides with strong, regular and weak binding predictions for *HLA-DQA1/-DQB1***

|                           | <b>IC<sub>50</sub> ≤ 50 nM<br/>Strong binders</b> | <b>50 nM &lt; IC<sub>50</sub> ≤ 1000 nM<br/>Regular binders</b> | <b>1000 nM &lt; IC<sub>50</sub> ≤ 5000 nM<br/>Weak binders</b> | <b>IC<sub>50</sub> &gt; 5000 nM<br/>Non binders</b> |
|---------------------------|---------------------------------------------------|-----------------------------------------------------------------|----------------------------------------------------------------|-----------------------------------------------------|
| HLA-DQA1*05:01/DQB1*02:01 | 0                                                 | 869                                                             | 3267                                                           | 2948                                                |
| HLA-DQA1*02:01/DQB1*02:01 | 0                                                 | 126                                                             | 2077                                                           | 4881                                                |
| HLA-DQA1*02:01/DQB1*02:02 | 0                                                 | 126                                                             | 2077                                                           | 4881                                                |
| HLA-DQA1*05:01/DQB1*02:03 | 0                                                 | 805                                                             | 3958                                                           | 2321                                                |
| HLA-DQA1*05:01/DQB1*03:01 | 9                                                 | 1172                                                            | 3251                                                           | 2652                                                |
| HLA-DQA1*03:01/DQB1*03:02 | 0                                                 | 142                                                             | 2860                                                           | 4082                                                |
| HLA-DQA1*02:01/DQB1*03:03 | 0                                                 | 1422                                                            | 3288                                                           | 2374                                                |
| HLA-DQA1*03:01/DQB1*03:03 | 0                                                 | 287                                                             | 3070                                                           | 3727                                                |
| HLA-DQA1*03:02/DQB1*03:03 | 0                                                 | 287                                                             | 3070                                                           | 3727                                                |
| HLA-DQA1*03:01/DQB1*03:04 | 0                                                 | 496                                                             | 4068                                                           | 2520                                                |
| HLA-DQA1*03:01/DQB1*03:05 | 0                                                 | 191                                                             | 4239                                                           | 2654                                                |
| HLA-DQA1*05:01/DQB1*03:05 | 0                                                 | 1536                                                            | 4572                                                           | 976                                                 |
| HLA-DQA1*03:01/DQB1*03:07 | 0                                                 | 142                                                             | 2860                                                           | 4082                                                |
| HLA-DQA1*01:03/DQB1*03:19 | 0                                                 | 1499                                                            | 3674                                                           | 1911                                                |
| HLA-DQA1*01:05/DQB1*03:19 | 0                                                 | 227                                                             | 2904                                                           | 3953                                                |
| HLA-DQA1*05:05/DQB1*03:19 | 9                                                 | 1172                                                            | 3251                                                           | 2652                                                |
| HLA-DQA1*03:01/DQB1*04:01 | 0                                                 | 95                                                              | 2047                                                           | 4942                                                |
| HLA-DQA1*03:03/DQB1*04:01 | 0                                                 | 95                                                              | 2047                                                           | 4942                                                |
| HLA-DQA1*04:01/DQB1*04:01 | 0                                                 | 181                                                             | 3043                                                           | 3860                                                |
| HLA-DQA1*04:01/DQB1*04:02 | 0                                                 | 181                                                             | 3043                                                           | 3860                                                |
| HLA-DQA1*01:01/DQB1*05:01 | 0                                                 | 262                                                             | 1756                                                           | 5066                                                |
| HLA-DQA1*01:02/DQB1*05:02 | 0                                                 | 149                                                             | 2000                                                           | 4935                                                |
| HLA-DQA1*01:01/DQB1*05:03 | 0                                                 | 30                                                              | 1232                                                           | 5822                                                |
| HLA-DQA1*01:03/DQB1*06:01 | 0                                                 | 550                                                             | 3593                                                           | 2941                                                |
| HLA-DQA1*01:02/DQB1*06:02 | 0                                                 | 676                                                             | 3375                                                           | 3033                                                |
| HLA-DQA1*01:03/DQB1*06:02 | 0                                                 | 877                                                             | 3388                                                           | 2819                                                |
| HLA-DQA1*01:02/DQB1*06:03 | 0                                                 | 7                                                               | 1051                                                           | 6026                                                |
| HLA-DQA1*01:03/DQB1*06:03 | 0                                                 | 43                                                              | 1099                                                           | 5942                                                |
| HLA-DQA1*01:02/DQB1*06:08 | 0                                                 | 36                                                              | 1750                                                           | 5298                                                |
| HLA-DQA1*01:02/DQB1*06:09 | 0                                                 | 0                                                               | 50                                                             | 7034                                                |
| HLA-DQA1*01:02/DQB1*06:10 | 0                                                 | 50                                                              | 2487                                                           | 4547                                                |
| HLA-DQA1*01:02/DQB1*06:11 | 0                                                 | 397                                                             | 2906                                                           | 3781                                                |
| HLA-DQA1*01:03/DQB1*06:11 | 0                                                 | 690                                                             | 3080                                                           | 3314                                                |
| HLA-DQA1*01:02/DQB1*06:14 | 0                                                 | 15                                                              | 1412                                                           | 5657                                                |

Allele combinations are ordered alphabetically.

## General binding prediction tendencies for *HLA-DQA1/DQB1*

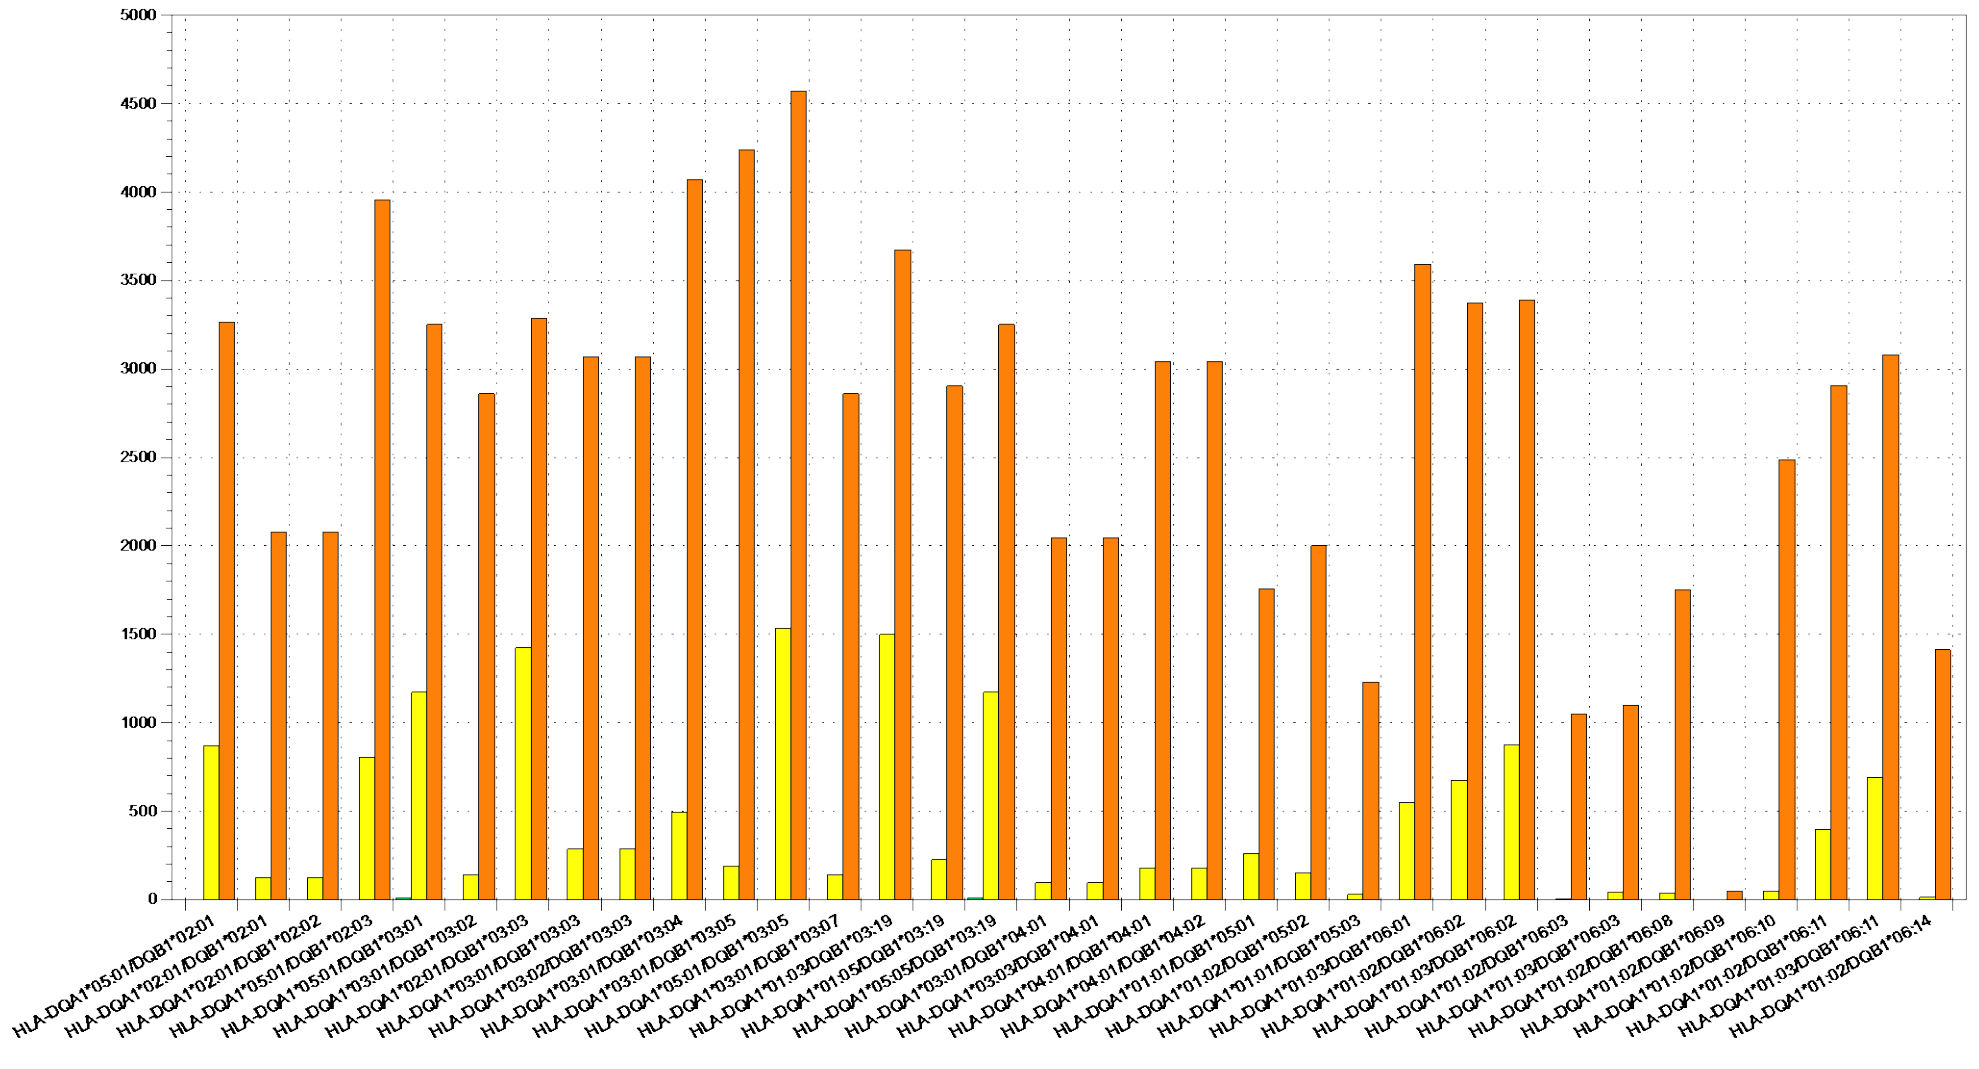

Allele combinations are ordered alphabetically on the x-axis, while the number of peptides binding with strong ( $IC_{50} \leq 50$  nM), regular ( $50$  nM  $< IC_{50} \leq 1000$  nM) and weak ( $1000$  nM  $< IC_{50} \leq 5000$  nM) binding prediction are displayed on the y-axis.

## HLA-DQA1/-DQB1 alleles ordered by number of presented peptides with strong binding prediction

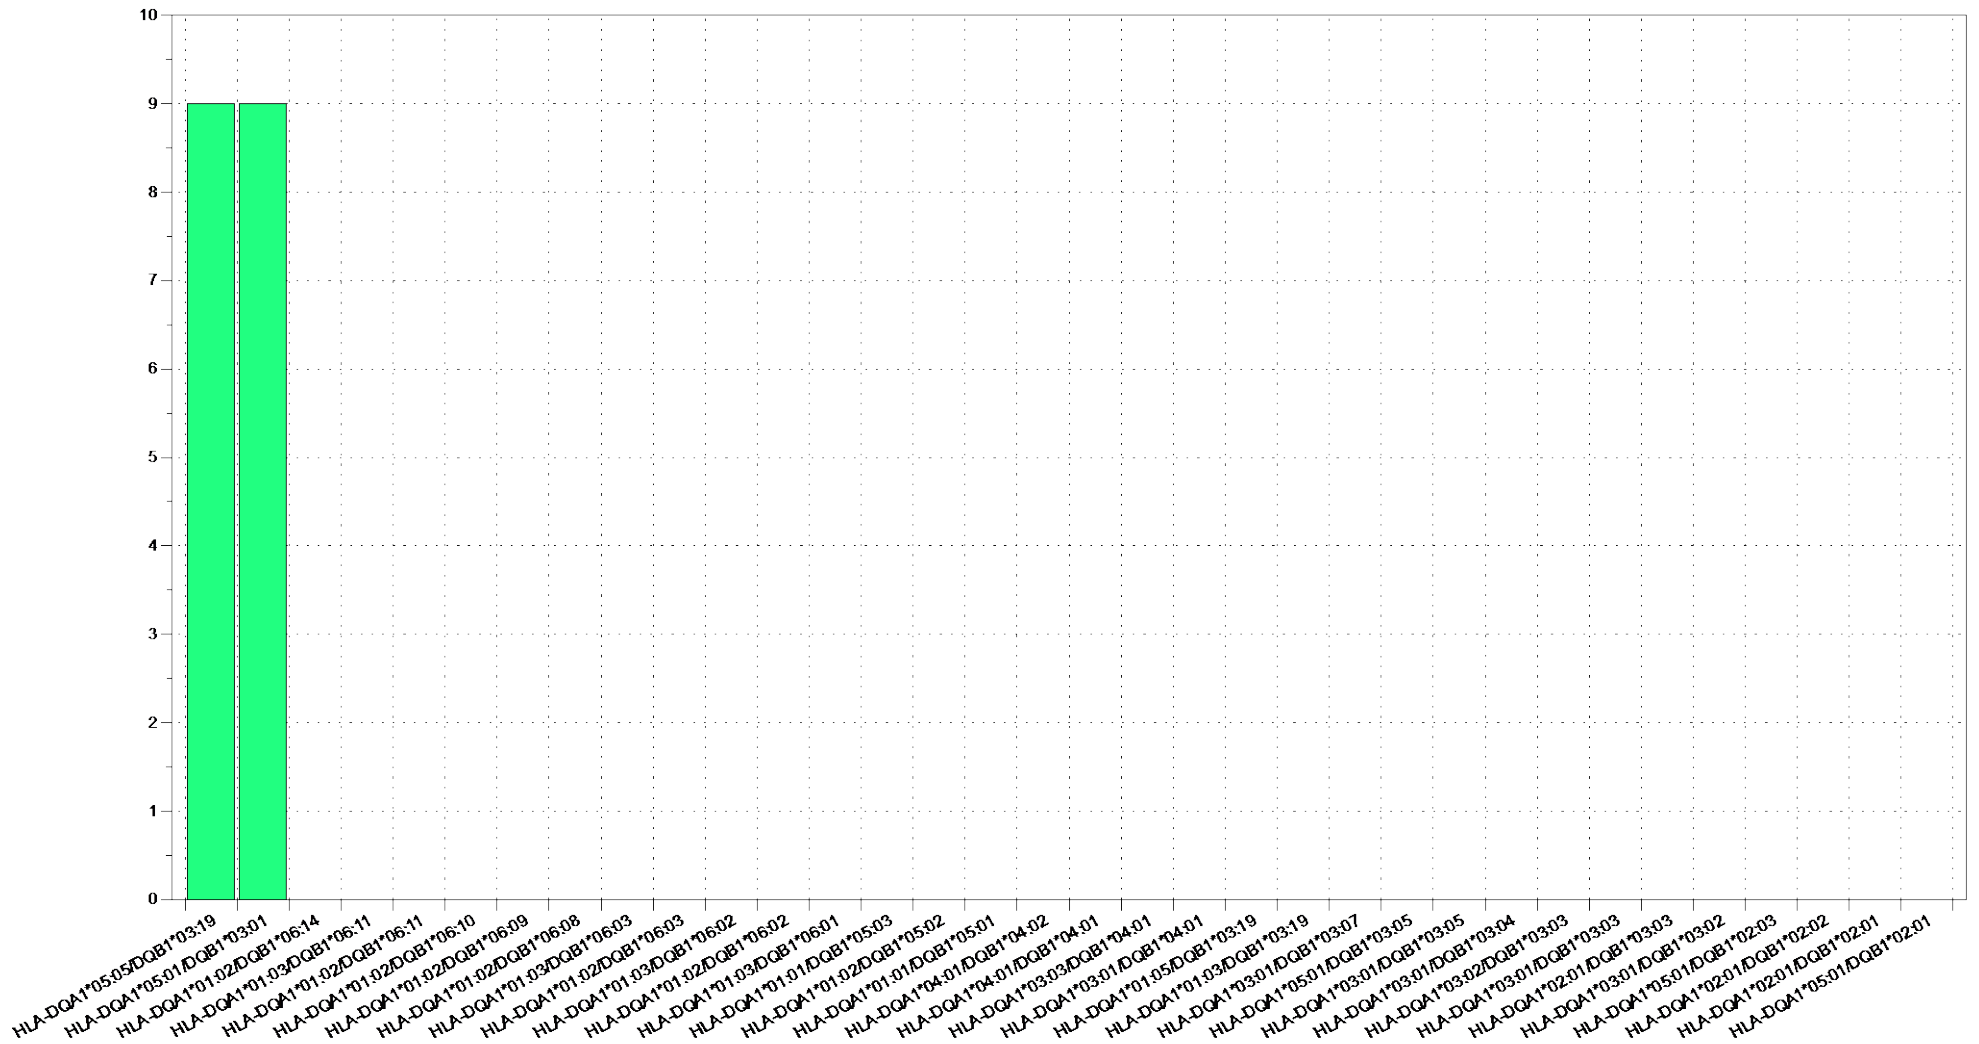

Allele combinations are ordered on the x-axis by their strong (IC<sub>50</sub> ≤ 50 nM) binding prediction and the number of peptides presented are displayed on the y-axis.

## HLA-DQA1/-DQB1 alleles ordered by number of presented peptides with regular binding prediction

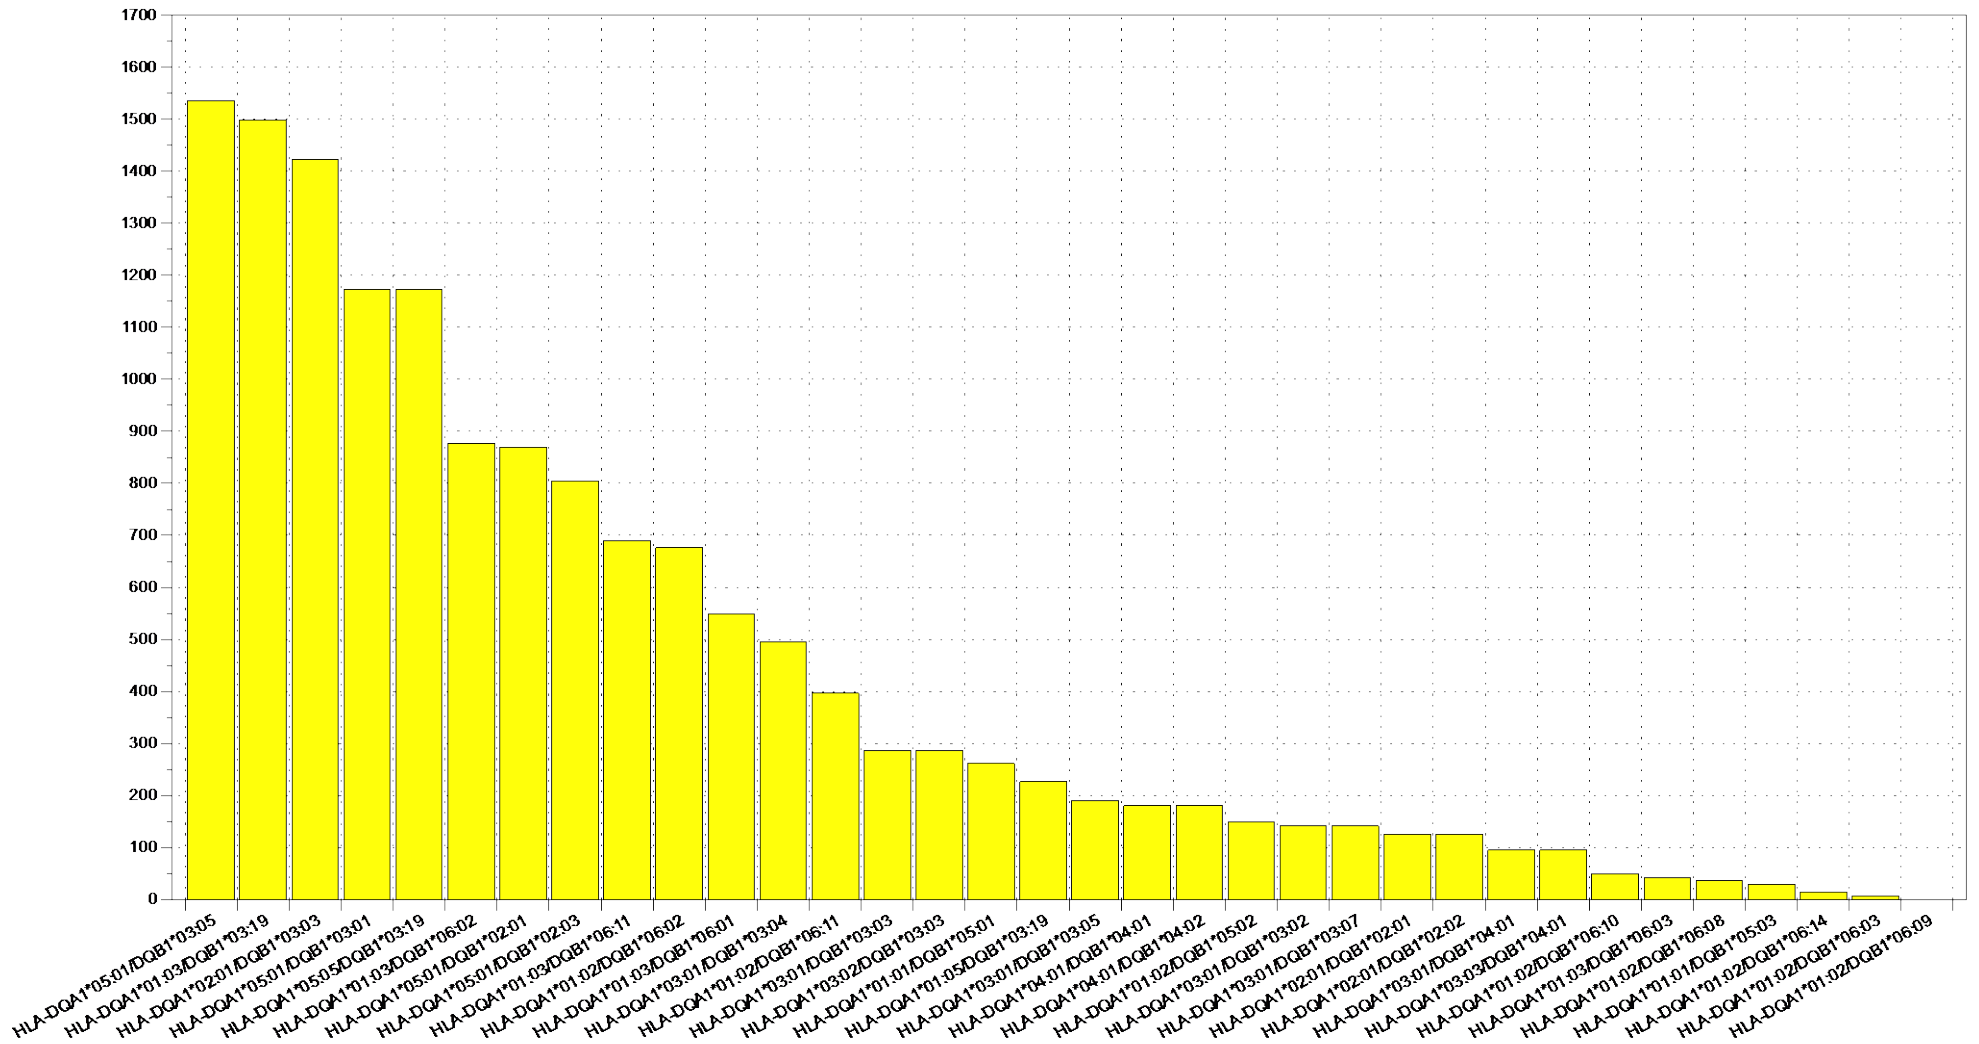

Allele combinations are ordered on the x-axis by their regular (50 nM < IC<sub>50</sub> ≤ 1000 nM) binding prediction and the number of peptides presented are displayed on the y-axis.

## HLA-DQA1/DQB1 alleles ordered by number of presented peptides with weak binding prediction

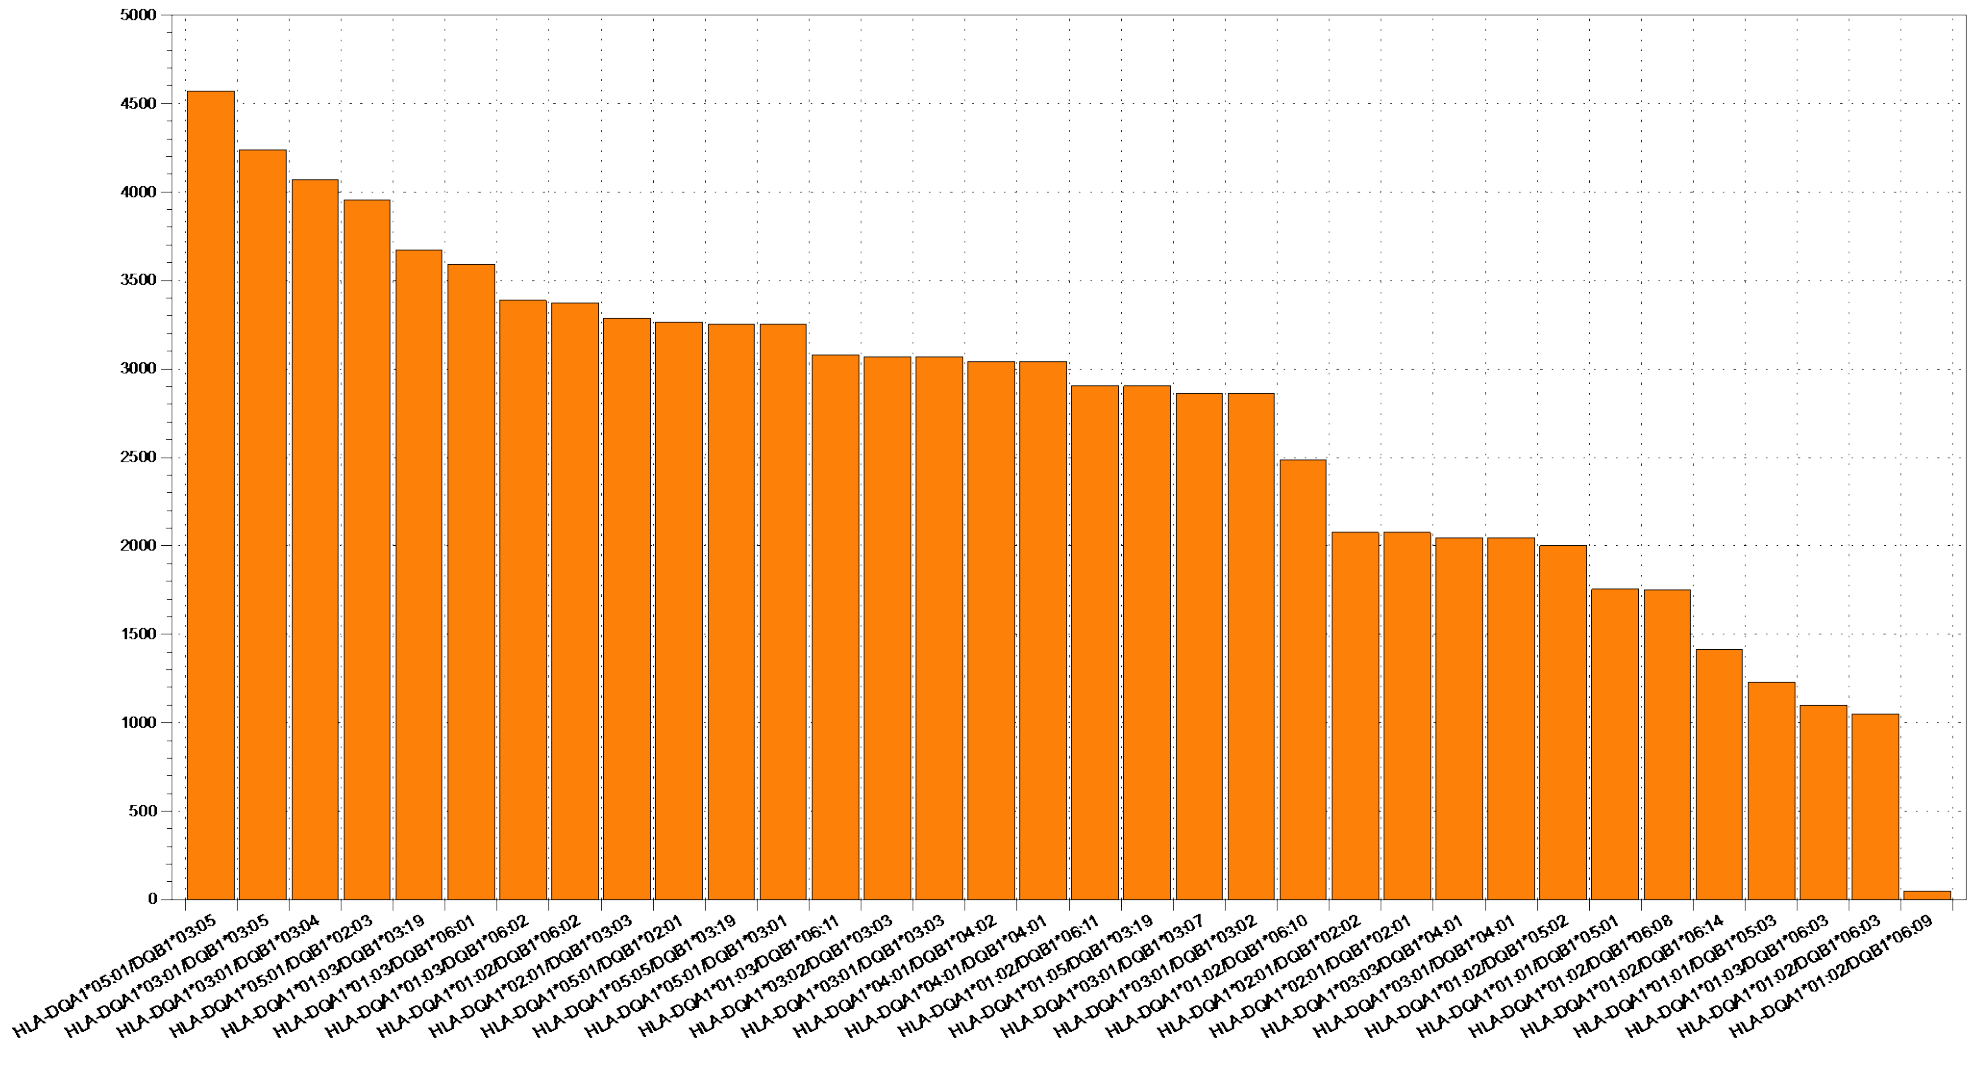

Allele combinations are ordered on the x-axis by their weak ( $1000 \text{ nM} < IC_{50} \leq 5000 \text{ nM}$ ) binding prediction and the number of peptides presented are displayed on the y-axis.
