# Supplementary material
Source: PubMed Central journal article supplement (PMC7300650)
Supplement: TAN-96-277-s008.pdf [file TAN-96-277-s008.pdf]

**Supplementary Table S4. List of strongest (> 1% bound peptides at IC50 ≤ 50 nM) and weakest (> 99% bound peptides at IC ≥ 500 nM for Class I and IC50 ≥ 1000 nM for Class II) HLA binders for all viruses**

| #Viruses     | Viruses                                                              | #Strongest | HLA strongest binders                                                                                                                                   | #Weakest   | HLA weakest binders                                                                                                                                                                                                                                                                                                                                                                                                                                                                                                                                                                                                                                                                                                                                                                                                                                                                                                                                                                                                                                                                                                                                                                                                                                                                                                          |
|--------------|----------------------------------------------------------------------|------------|---------------------------------------------------------------------------------------------------------------------------------------------------------|------------|------------------------------------------------------------------------------------------------------------------------------------------------------------------------------------------------------------------------------------------------------------------------------------------------------------------------------------------------------------------------------------------------------------------------------------------------------------------------------------------------------------------------------------------------------------------------------------------------------------------------------------------------------------------------------------------------------------------------------------------------------------------------------------------------------------------------------------------------------------------------------------------------------------------------------------------------------------------------------------------------------------------------------------------------------------------------------------------------------------------------------------------------------------------------------------------------------------------------------------------------------------------------------------------------------------------------------|
| 7            | All viruses<br>(CoV-1, CoV-2, MERS, H1N1, H3N2, H7N9, HIV-1)         | 16         | A*02:02, A*02:03, A*02:06,<br>A*02:11, A*02:12, A*02:22,<br>A*31:04<br><br>B*15:03, B*15:17                                                             | 121        | A*01:01, A*01:02, A*01:03, A*01:06, A*02:07,<br>A*25:01, A*25:02, A*26:01, A*26:03, A*26:05,<br>A*26:12, A*26:18, A*36:01, A*43:01, A*66:01,<br>A*66:03, A*74:01, A*74:03<br><br>B*08:03, B*08:04, B*08:05, B*13:02, B*13:03,<br>B*13:04, B*14:01, B*14:02, B*14:03, B*15:04,<br>B*15:08, B*15:09, B*15:10, B*15:11, B*15:13,<br>B*15:18, B*15:21, B*15:24, B*15:58, B*18:01,<br>B*18:02, B*18:03, B*18:05, B*18:07, B*27:02,<br>B*27:03, B*27:04, B*27:14, B*35:02, B*35:03,<br>B*35:04, B*35:06, B*35:09, B*35:12, B*37:01,<br>B*38:01, B*38:02, B*39:05, B*39:06, B*40:01,<br>B*40:06, B*40:10, B*40:12, B*42:02, B*44:02,<br>B*44:03, B*44:04, B*44:05, B*44:06, B*44:07,<br>B*44:15, B*45:01, B*46:01, B*47:01, B*47:03,<br>B*48:01, B*48:03, B*48:04, B*49:01, B*50:01,<br>B*50:02, B*51:01, B*51:02, B*51:04, B*51:05,<br>B*51:06, B*51:07, B*51:08, B*51:09, B*52:01,<br>B*53:02, B*54:01, B*55:01, B*55:07, B*55:12,<br>B*56:01, B*58:02, B*59:01, B*73:01, B*78:01,<br>B*78:02, B*81:01, B*82:01, B*82:02<br><br>C*01:02, C*01:03, C*04:01, C*04:03, C*04:04,<br>C*04:05, C*04:06, C*04:07, C*05:01, C*07:04,<br>C*07:07, C*07:08, C*07:11, C*08:02, C*17:03,<br>C*18:01, C*18:02<br><br>DRB1*01:01, DRB1*01:04,<br>DRB1*10:01, DRB1*11:02,<br>DRB1*13:01, DRB1*13:04,<br>DRB1*13:22<br><br>DRB1*03:02, DRB1*03:03 |
| 3            | Only coronaviruses<br>(CoV1, CoV-2, MERS)                            | 15         | A*02:01, A*02:05, A*02:09,<br>A*02:14, A*02:24, A*02:26,<br>A*02:34, A*02:35, A*02:40,<br>A*24:03, A*24:10, A*24:23,<br>A*68:02<br><br>C*14:02, C*14:03 | 1          | B*27:05                                                                                                                                                                                                                                                                                                                                                                                                                                                                                                                                                                                                                                                                                                                                                                                                                                                                                                                                                                                                                                                                                                                                                                                                                                                                                                                      |
| 6            | All viruses but HIV-1<br>(only CoV-1, CoV-2, MERS, H1N1, H3N2, H7N9) | 9          | A*68:01, A*68:12<br><br>B*15:25, B*15:39, B*35:10<br><br>C*03:02<br><br>DRB1*07:01, DRB1*11:14,<br>DRB1*13:02                                           |            |                                                                                                                                                                                                                                                                                                                                                                                                                                                                                                                                                                                                                                                                                                                                                                                                                                                                                                                                                                                                                                                                                                                                                                                                                                                                                                                              |
| 5            | Only CoV-2, H1N1, H3N2, H7N9, HIV-1                                  | 7          | DRB1*11:01, DRB1*11:09,<br>DRB1*11:10, DRB1*11:12,<br>DRB1*11:15, DRB1*11:28,<br>DRB1*13:05                                                             | 1          | B*53:01                                                                                                                                                                                                                                                                                                                                                                                                                                                                                                                                                                                                                                                                                                                                                                                                                                                                                                                                                                                                                                                                                                                                                                                                                                                                                                                      |
| 2            | Only CoV-1, CoV-2                                                    | 3          | A*11:01, A*11:02, A*11:12                                                                                                                               | 1          | B*13:01                                                                                                                                                                                                                                                                                                                                                                                                                                                                                                                                                                                                                                                                                                                                                                                                                                                                                                                                                                                                                                                                                                                                                                                                                                                                                                                      |
| 1            | Only CoV-2                                                           | 2          | C*03:03, C*03:04                                                                                                                                        | 1          | B*27:06                                                                                                                                                                                                                                                                                                                                                                                                                                                                                                                                                                                                                                                                                                                                                                                                                                                                                                                                                                                                                                                                                                                                                                                                                                                                                                                      |
| 2            | Only CoV-2, MERS                                                     | 2          | A*12:19, A*02:20                                                                                                                                        |            |                                                                                                                                                                                                                                                                                                                                                                                                                                                                                                                                                                                                                                                                                                                                                                                                                                                                                                                                                                                                                                                                                                                                                                                                                                                                                                                              |
| 4            | Only H1N1, H3N2, H7N9, HIV-1                                         | 2          | DRB1*11:03, DRB1*11:11                                                                                                                                  | 5          | A*02:17, A*24:06, A*68:06<br>B*35:08, B*55:02                                                                                                                                                                                                                                                                                                                                                                                                                                                                                                                                                                                                                                                                                                                                                                                                                                                                                                                                                                                                                                                                                                                                                                                                                                                                                |
| 3            | Only H1N1, H3N2, HIV-1                                               | 2          | DRB1*11:04, DRB1*13:11                                                                                                                                  |            |                                                                                                                                                                                                                                                                                                                                                                                                                                                                                                                                                                                                                                                                                                                                                                                                                                                                                                                                                                                                                                                                                                                                                                                                                                                                                                                              |
| 4            | Only CoV-1, CoV-2, MERS, HIV-1                                       | 1          | A*23:04                                                                                                                                                 | 3          | B*07:04, B*27:08, B*44:09                                                                                                                                                                                                                                                                                                                                                                                                                                                                                                                                                                                                                                                                                                                                                                                                                                                                                                                                                                                                                                                                                                                                                                                                                                                                                                    |
| 5            | Only CoV-1, CoV-2, MERS, H3N2, H7N9                                  | 1          | B*48:02                                                                                                                                                 |            |                                                                                                                                                                                                                                                                                                                                                                                                                                                                                                                                                                                                                                                                                                                                                                                                                                                                                                                                                                                                                                                                                                                                                                                                                                                                                                                              |
| 6            | Only CoV-2, MERS, H1N1, H3N2, H7N9, HIV-1                            | 1          | DRB1*13:08                                                                                                                                              |            |                                                                                                                                                                                                                                                                                                                                                                                                                                                                                                                                                                                                                                                                                                                                                                                                                                                                                                                                                                                                                                                                                                                                                                                                                                                                                                                              |
| 1            | Only H1N1                                                            | 1          | A*31:02                                                                                                                                                 |            |                                                                                                                                                                                                                                                                                                                                                                                                                                                                                                                                                                                                                                                                                                                                                                                                                                                                                                                                                                                                                                                                                                                                                                                                                                                                                                                              |
| 3            | Only H1N1, H3N2, H7N9                                                | 1          | A*30:01                                                                                                                                                 | 4          | A*24:02, A*24:05, A*24:20, A*24:21                                                                                                                                                                                                                                                                                                                                                                                                                                                                                                                                                                                                                                                                                                                                                                                                                                                                                                                                                                                                                                                                                                                                                                                                                                                                                           |
| 3            | Only H1N1, H7N9, HIV-1                                               | 1          | A*31:01                                                                                                                                                 |            |                                                                                                                                                                                                                                                                                                                                                                                                                                                                                                                                                                                                                                                                                                                                                                                                                                                                                                                                                                                                                                                                                                                                                                                                                                                                                                                              |
| 3            | Only CoV-2, MERS, H7N9                                               | 1          | C*12:03                                                                                                                                                 |            |                                                                                                                                                                                                                                                                                                                                                                                                                                                                                                                                                                                                                                                                                                                                                                                                                                                                                                                                                                                                                                                                                                                                                                                                                                                                                                                              |
| 6            | Only CoV-1, CoV-2, MERS, H3N2, H7N9, HIV-1                           |            |                                                                                                                                                         | 1          | B*57:02                                                                                                                                                                                                                                                                                                                                                                                                                                                                                                                                                                                                                                                                                                                                                                                                                                                                                                                                                                                                                                                                                                                                                                                                                                                                                                                      |
| 1            | Only CoV-1                                                           |            |                                                                                                                                                         | 1          | B*40:03                                                                                                                                                                                                                                                                                                                                                                                                                                                                                                                                                                                                                                                                                                                                                                                                                                                                                                                                                                                                                                                                                                                                                                                                                                                                                                                      |
| 3            | Only CoV-1, CoV-2, HIV-1                                             |            |                                                                                                                                                         | 1          | A*30:08                                                                                                                                                                                                                                                                                                                                                                                                                                                                                                                                                                                                                                                                                                                                                                                                                                                                                                                                                                                                                                                                                                                                                                                                                                                                                                                      |
| 3            | Only CoV-1, MERS, HIV-1                                              |            |                                                                                                                                                         | 1          | C*06:06                                                                                                                                                                                                                                                                                                                                                                                                                                                                                                                                                                                                                                                                                                                                                                                                                                                                                                                                                                                                                                                                                                                                                                                                                                                                                                                      |
| 4            | Only CoV-1, MERS, H3N2, HIV-1                                        |            |                                                                                                                                                         | 1          | B*40:16                                                                                                                                                                                                                                                                                                                                                                                                                                                                                                                                                                                                                                                                                                                                                                                                                                                                                                                                                                                                                                                                                                                                                                                                                                                                                                                      |
| 2            | Only CoV-2, HIV-1                                                    |            |                                                                                                                                                         | 1          | B*07:02                                                                                                                                                                                                                                                                                                                                                                                                                                                                                                                                                                                                                                                                                                                                                                                                                                                                                                                                                                                                                                                                                                                                                                                                                                                                                                                      |
| 4            | Only CoV-2, H3N2, H7N9, HIV-1                                        |            |                                                                                                                                                         | 1          | B*35:05                                                                                                                                                                                                                                                                                                                                                                                                                                                                                                                                                                                                                                                                                                                                                                                                                                                                                                                                                                                                                                                                                                                                                                                                                                                                                                                      |
| 2            | Only MERS, HIV-1                                                     |            |                                                                                                                                                         | 1          | C*07:05                                                                                                                                                                                                                                                                                                                                                                                                                                                                                                                                                                                                                                                                                                                                                                                                                                                                                                                                                                                                                                                                                                                                                                                                                                                                                                                      |
| 6            | Only CoV-1, CoV-2, H1N1, H3N2, H7N9, HIV-1                           |            |                                                                                                                                                         | 2          | A*24:04, A*30:04                                                                                                                                                                                                                                                                                                                                                                                                                                                                                                                                                                                                                                                                                                                                                                                                                                                                                                                                                                                                                                                                                                                                                                                                                                                                                                             |
| 3            | Only H3N2, H7N9, HIV-1                                               |            |                                                                                                                                                         | 2          | B*56:02, B*56:04                                                                                                                                                                                                                                                                                                                                                                                                                                                                                                                                                                                                                                                                                                                                                                                                                                                                                                                                                                                                                                                                                                                                                                                                                                                                                                             |
| 2            | Only H7N9, HIV-1                                                     |            |                                                                                                                                                         | 2          | B*15:12, B*67:01                                                                                                                                                                                                                                                                                                                                                                                                                                                                                                                                                                                                                                                                                                                                                                                                                                                                                                                                                                                                                                                                                                                                                                                                                                                                                                             |
| 5            | Only CoV-1, CoV-2, MERS, H3N2, HIV-1                                 |            |                                                                                                                                                         | 4          | C*06:02, C*07:01, C*07:06, C*07:18                                                                                                                                                                                                                                                                                                                                                                                                                                                                                                                                                                                                                                                                                                                                                                                                                                                                                                                                                                                                                                                                                                                                                                                                                                                                                           |
| 5            | Only CoV-1, H1N1, H3N2, H7N9, HIV-1                                  |            |                                                                                                                                                         | 7          | A*24:07, A*24:08, A*26:08, A*80:01<br>C*08:01, C*08:03, C*08:04                                                                                                                                                                                                                                                                                                                                                                                                                                                                                                                                                                                                                                                                                                                                                                                                                                                                                                                                                                                                                                                                                                                                                                                                                                                              |
| 1            | Only HIV-1                                                           |            |                                                                                                                                                         | 25         | A*34:01, A*66:02<br><br>B*15:02, B*15:15, B*15:31, B*35:01, B*35:05,<br>B*35:17, B*35:20, B*35:21, B*35:43, B*39:01,<br>B*39:04, B*39:07, B*39:09, B*39:15, B*53:03,<br>B*56:03<br><br>C*06:04, C*07:02, C*07:03, C*07:10, C*15:05,<br>C*15:08, C*17:01                                                                                                                                                                                                                                                                                                                                                                                                                                                                                                                                                                                                                                                                                                                                                                                                                                                                                                                                                                                                                                                                      |
| <b>Total</b> |                                                                      | <b>65</b>  |                                                                                                                                                         | <b>187</b> |                                                                                                                                                                                                                                                                                                                                                                                                                                                                                                                                                                                                                                                                                                                                                                                                                                                                                                                                                                                                                                                                                                                                                                                                                                                                                                                              |
