# Supplementary material
Source: PubMed Central journal article supplement (PMC7300650)
Supplement: TAN-96-277-s009.pdf [file TAN-96-277-s009.pdf]

Supplementary Table S3. List of alleles used in this study.

| HLA-A       | HLA-B       | HLA-C       | HLA-DRB1       | HLA-DQA1/DQB1             |
|-------------|-------------|-------------|----------------|---------------------------|
| HLA-A*01:01 | HLA-B*07:02 | HLA-C*01:02 | HLA-DRB1*01:01 | HLA-DQA1*05:01/DQB1*02:01 |
| HLA-A*01:02 | HLA-B*07:04 | HLA-C*01:03 | HLA-DRB1*01:02 | HLA-DQA1*02:01/DQB1*02:01 |
| HLA-A*01:03 | HLA-B*07:05 | HLA-C*02:02 | HLA-DRB1*01:03 | HLA-DQA1*02:01/DQB1*02:02 |
| HLA-A*01:06 | HLA-B*07:06 | HLA-C*02:03 | HLA-DRB1*01:04 | HLA-DQA1*05:01/DQB1*02:03 |
| HLA-A*02:01 | HLA-B*08:01 | HLA-C*03:02 | HLA-DRB1*03:01 | HLA-DQA1*05:01/DQB1*03:01 |
| HLA-A*02:02 | HLA-B*08:03 | HLA-C*03:03 | HLA-DRB1*03:02 | HLA-DQA1*03:01/DQB1*03:02 |
| HLA-A*02:03 | HLA-B*08:04 | HLA-C*03:04 | HLA-DRB1*03:03 | HLA-DQA1*02:01/DQB1*03:03 |
| HLA-A*02:04 | HLA-B*08:05 | HLA-C*03:05 | HLA-DRB1*03:04 | HLA-DQA1*03:01/DQB1*03:03 |
| HLA-A*02:05 | HLA-B*13:01 | HLA-C*03:07 | HLA-DRB1*03:05 | HLA-DQA1*03:02/DQB1*03:03 |
| HLA-A*02:06 | HLA-B*13:02 | HLA-C*04:01 | HLA-DRB1*03:06 | HLA-DQA1*03:01/DQB1*03:04 |
| HLA-A*02:07 | HLA-B*13:03 | HLA-C*04:02 | HLA-DRB1*03:07 | HLA-DQA1*03:01/DQB1*03:05 |
| HLA-A*02:08 | HLA-B*13:04 | HLA-C*04:04 | HLA-DRB1*03:08 | HLA-DQA1*05:01/DQB1*03:05 |
| HLA-A*02:09 | HLA-B*14:01 | HLA-C*04:05 | HLA-DRB1*04:01 | HLA-DQA1*03:01/DQB1*03:07 |
| HLA-A*02:10 | HLA-B*14:02 | HLA-C*04:06 | HLA-DRB1*04:02 | HLA-DQA1*01:03/DQB1*03:19 |
| HLA-A*02:11 | HLA-B*14:03 | HLA-C*04:07 | HLA-DRB1*04:03 | HLA-DQA1*01:05/DQB1*03:19 |
| HLA-A*02:12 | HLA-B*15:01 | HLA-C*05:01 | HLA-DRB1*04:04 | HLA-DQA1*05:05/DQB1*03:19 |
| HLA-A*02:14 | HLA-B*15:02 | HLA-C*06:02 | HLA-DRB1*04:05 | HLA-DQA1*03:01/DQB1*04:01 |
| HLA-A*02:17 | HLA-B*15:03 | HLA-C*06:04 | HLA-DRB1*04:06 | HLA-DQA1*03:03/DQB1*04:01 |
| HLA-A*02:19 | HLA-B*15:04 | HLA-C*06:06 | HLA-DRB1*04:07 | HLA-DQA1*04:01/DQB1*04:01 |
| HLA-A*02:20 | HLA-B*15:05 | HLA-C*07:01 | HLA-DRB1*04:08 | HLA-DQA1*04:01/DQB1*04:02 |
| HLA-A*02:22 | HLA-B*15:06 | HLA-C*07:02 | HLA-DRB1*04:10 | HLA-DQA1*01:03/DQB1*05:01 |
| HLA-A*02:24 | HLA-B*15:07 | HLA-C*07:03 | HLA-DRB1*04:11 | HLA-DQA1*01:02/DQB1*05:02 |
| HLA-A*02:26 | HLA-B*15:08 | HLA-C*07:04 | HLA-DRB1*04:13 | HLA-DQA1*01:01/DQB1*05:03 |
| HLA-A*02:34 | HLA-B*15:09 | HLA-C*07:05 | HLA-DRB1*04:15 | HLA-DQA1*01:03/DQB1*06:01 |
| HLA-A*02:35 | HLA-B*15:10 | HLA-C*07:06 | HLA-DRB1*04:17 | HLA-DQA1*01:02/DQB1*06:02 |
| HLA-A*02:36 | HLA-B*15:11 | HLA-C*07:07 | HLA-DRB1*07:01 | HLA-DQA1*01:03/DQB1*06:02 |
| HLA-A*02:40 | HLA-B*15:12 | HLA-C*07:08 | HLA-DRB1*08:01 | HLA-DQA1*01:02/DQB1*06:03 |
| HLA-A*03:01 | HLA-B*15:13 | HLA-C*07:10 | HLA-DRB1*08:02 | HLA-DQA1*01:03/DQB1*06:03 |
| HLA-A*03:02 | HLA-B*15:15 | HLA-C*07:11 | HLA-DRB1*08:03 | HLA-DQA1*01:02/DQB1*06:06 |
| HLA-A*03:05 | HLA-B*15:16 | HLA-C*07:18 | HLA-DRB1*08:04 | HLA-DQA1*01:02/DQB1*06:09 |
| HLA-A*03:08 | HLA-B*15:17 | HLA-C*08:01 | HLA-DRB1*08:05 | HLA-DQA1*01:02/DQB1*06:10 |
| HLA-A*11:01 | HLA-B*15:18 | HLA-C*08:02 | HLA-DRB1*08:06 | HLA-DQA1*01:02/DQB1*06:11 |
| HLA-A*11:02 | HLA-B*15:19 | HLA-C*08:03 | HLA-DRB1*08:07 | HLA-DQA1*01:03/DQB1*06:11 |
| HLA-A*11:03 | HLA-B*15:21 | HLA-C*08:04 | HLA-DRB1*08:09 | HLA-DQA1*01:02/DQB1*06:14 |
| HLA-A*11:04 | HLA-B*15:24 | HLA-C*12:02 | HLA-DRB1*08:10 |                           |
| HLA-A*11:06 | HLA-B*15:25 | HLA-C*12:03 | HLA-DRB1*08:11 |                           |
| HLA-A*11:12 | HLA-B*15:27 | HLA-C*12:04 | HLA-DRB1*08:12 |                           |
| HLA-A*23:01 | HLA-B*15:29 | HLA-C*12:05 | HLA-DRB1*09:01 |                           |
| HLA-A*23:03 | HLA-B*15:31 | HLA-C*14:02 | HLA-DRB1*10:01 |                           |
| HLA-A*23:04 | HLA-B*15:32 | HLA-C*14:03 | HLA-DRB1*11:01 |                           |
| HLA-A*24:02 | HLA-B*15:34 | HLA-C*15:02 | HLA-DRB1*11:02 |                           |
| HLA-A*24:03 | HLA-B*15:35 | HLA-C*15:03 | HLA-DRB1*11:03 |                           |
| HLA-A*24:04 | HLA-B*15:38 | HLA-C*15:04 | HLA-DRB1*11:04 |                           |
| HLA-A*24:05 | HLA-B*15:39 | HLA-C*15:05 | HLA-DRB1*11:05 |                           |
| HLA-A*24:06 | HLA-B*15:40 | HLA-C*15:06 | HLA-DRB1*11:06 |                           |
| HLA-A*24:07 | HLA-B*15:58 | HLA-C*15:07 | HLA-DRB1*11:08 |                           |
| HLA-A*24:08 | HLA-B*16:01 | HLA-C*15:08 | HLA-DRB1*11:09 |                           |
| HLA-A*24:10 | HLA-B*18:02 | HLA-C*15:13 | HLA-DRB1*11:10 |                           |
| HLA-A*24:13 | HLA-B*18:03 | HLA-C*16:01 | HLA-DRB1*11:11 |                           |
| HLA-A*24:20 | HLA-B*18:05 | HLA-C*16:02 | HLA-DRB1*11:12 |                           |
| HLA-A*24:21 | HLA-B*18:07 | HLA-C*16:04 | HLA-DRB1*11:14 |                           |
| HLA-A*24:23 | HLA-B*27:02 | HLA-C*17:01 | HLA-DRB1*11:15 |                           |
| HLA-A*25:01 | HLA-B*27:03 | HLA-C*17:03 | HLA-DRB1*11:19 |                           |
| HLA-A*25:02 | HLA-B*27:04 | HLA-C*18:01 | HLA-DRB1*11:28 |                           |
| HLA-A*26:01 | HLA-B*27:05 | HLA-C*18:02 | HLA-DRB1*12:01 |                           |
| HLA-A*26:02 | HLA-B*27:06 |             | HLA-DRB1*12:02 |                           |
| HLA-A*26:03 | HLA-B*27:07 |             | HLA-DRB1*12:03 |                           |
| HLA-A*26:05 | HLA-B*27:08 |             | HLA-DRB1*13:01 |                           |
| HLA-A*26:08 | HLA-B*27:09 |             | HLA-DRB1*13:02 |                           |
| HLA-A*26:12 | HLA-B*27:12 |             | HLA-DRB1*13:03 |                           |
| HLA-A*26:18 | HLA-B*27:14 |             | HLA-DRB1*13:04 |                           |
| HLA-A*29:01 | HLA-B*35:01 |             | HLA-DRB1*13:05 |                           |
| HLA-A*29:02 | HLA-B*35:02 |             | HLA-DRB1*13:06 |                           |
| HLA-A*30:01 | HLA-B*35:03 |             | HLA-DRB1*13:07 |                           |
| HLA-A*30:02 | HLA-B*35:04 |             | HLA-DRB1*13:08 |                           |
| HLA-A*30:04 | HLA-B*35:05 |             | HLA-DRB1*13:10 |                           |
| HLA-A*30:08 | HLA-B*35:06 |             | HLA-DRB1*13:11 |                           |
| HLA-A*31:01 | HLA-B*35:08 |             | HLA-DRB1*13:12 |                           |
| HLA-A*31:02 | HLA-B*35:09 |             | HLA-DRB1*13:22 |                           |
| HLA-A*31:04 | HLA-B*35:10 |             | HLA-DRB1*14:01 |                           |
| HLA-A*31:08 | HLA-B*35:11 |             | HLA-DRB1*14:02 |                           |
| HLA-A*32:01 | HLA-B*35:12 |             | HLA-DRB1*14:03 |                           |
| HLA-A*32:02 | HLA-B*35:17 |             | HLA-DRB1*14:04 |                           |
| HLA-A*32:03 | HLA-B*35:19 |             | HLA-DRB1*14:05 |                           |
| HLA-A*33:01 | HLA-B*35:20 |             | HLA-DRB1*14:06 |                           |
| HLA-A*33:03 | HLA-B*35:21 |             | HLA-DRB1*14:07 |                           |
| HLA-A*34:01 | HLA-B*35:32 |             | HLA-DRB1*14:08 |                           |
| HLA-A*34:02 | HLA-B*35:43 |             | HLA-DRB1*14:09 |                           |
| HLA-A*36:01 | HLA-B*37:01 |             | HLA-DRB1*14:10 |                           |
| HLA-A*43:01 | HLA-B*38:01 |             | HLA-DRB1*14:12 |                           |
| HLA-A*46:01 | HLA-B*38:02 |             | HLA-DRB1*14:13 |                           |
| HLA-A*46:02 | HLA-B*39:01 |             | HLA-DRB1*14:14 |                           |
| HLA-A*46:03 | HLA-B*39:02 |             | HLA-DRB1*14:18 |                           |
| HLA-A*46:04 | HLA-B*39:03 |             | HLA-DRB1*14:54 |                           |
| HLA-A*46:05 | HLA-B*39:04 |             | HLA-DRB1*15:01 |                           |
| HLA-A*46:06 | HLA-B*39:05 |             | HLA-DRB1*15:02 |                           |
| HLA-A*46:07 | HLA-B*39:06 |             | HLA-DRB1*15:03 |                           |
| HLA-A*46:12 | HLA-B*39:07 |             | HLA-DRB1*15:04 |                           |
| HLA-A*49:01 | HLA-B*39:09 |             | HLA-DRB1*15:06 |                           |
| HLA-A*49:02 | HLA-B*39:10 |             | HLA-DRB1*15:11 |                           |
| HLA-A*49:03 | HLA-B*39:15 |             | HLA-DRB1*16:01 |                           |
| HLA-A*80:01 | HLA-B*39:24 |             | HLA-DRB1*16:02 |                           |
|             | HLA-B*40:01 |             | HLA-DRB1*16:03 |                           |
|             | HLA-B*40:02 |             | HLA-DRB1*16:05 |                           |
|             | HLA-B*40:03 |             |                |                           |
|             | HLA-B*40:04 |             |                |                           |
|             | HLA-B*40:05 |             |                |                           |
|             | HLA-B*40:06 |             |                |                           |
|             | HLA-B*40:09 |             |                |                           |
|             | HLA-B*40:10 |             |                |                           |
|             | HLA-B*40:11 |             |                |                           |
|             | HLA-B*40:12 |             |                |                           |
|             | HLA-B*40:14 |             |                |                           |
|             | HLA-B*40:16 |             |                |                           |
|             | HLA-B*40:40 |             |                |                           |
|             | HLA-B*41:01 |             |                |                           |
|             | HLA-B*41:02 |             |                |                           |
|             | HLA-B*42:01 |             |                |                           |
|             | HLA-B*42:02 |             |                |                           |
|             | HLA-B*44:02 |             |                |                           |
|             | HLA-B*44:03 |             |                |                           |
|             | HLA-B*44:04 |             |                |                           |
|             | HLA-B*44:05 |             |                |                           |
|             | HLA-B*44:06 |             |                |                           |
|             | HLA-B*44:07 |             |                |                           |
|             | HLA-B*44:15 |             |                |                           |
|             | HLA-B*45:01 |             |                |                           |
|             | HLA-B*46:01 |             |                |                           |
|             | HLA-B*47:01 |             |                |                           |
|             | HLA-B*47:03 |             |                |                           |
|             | HLA-B*48:01 |             |                |                           |
|             | HLA-B*48:02 |             |                |                           |
|             | HLA-B*48:03 |             |                |                           |
|             | HLA-B*48:04 |             |                |                           |
|             | HLA-B*49:01 |             |                |                           |
|             | HLA-B*50:01 |             |                |                           |
|             | HLA-B*50:02 |             |                |                           |
|             | HLA-B*51:01 |             |                |                           |
|             | HLA-B*51:02 |             |                |                           |
|             | HLA-B*51:04 |             |                |                           |
|             | HLA-B*51:05 |             |                |                           |
|             | HLA-B*51:06 |             |                |                           |
|             | HLA-B*51:07 |             |                |                           |
|             | HLA-B*51:08 |             |                |                           |
|             | HLA-B*51:09 |             |                |                           |
|             | HLA-B*51:10 |             |                |                           |
|             | HLA-B*53:01 |             |                |                           |
|             | HLA-B*53:02 |             |                |                           |
|             | HLA-B*53:03 |             |                |                           |
|             | HLA-B*53:05 |             |                |                           |
|             | HLA-B*54:01 |             |                |                           |
|             | HLA-B*55:01 |             |                |                           |
|             | HLA-B*55:02 |             |                |                           |
|             | HLA-B*55:04 |             |                |                           |
|             | HLA-B*55:07 |             |                |                           |
|             | HLA-B*55:12 |             |                |                           |
|             | HLA-B*56:01 |             |                |                           |
|             | HLA-B*56:02 |             |                |                           |
|             | HLA-B*56:03 |             |                |                           |
|             | HLA-B*56:04 |             |                |                           |
|             | HLA-B*57:01 |             |                |                           |
|             | HLA-B*57:02 |             |                |                           |
|             | HLA-B*57:03 |             |                |                           |
|             | HLA-B*58:01 |             |                |                           |
|             | HLA-B*58:02 |             |                |                           |
|             | HLA-B*59:01 |             |                |                           |
|             | HLA-B*67:01 |             |                |                           |
|             | HLA-B*73:01 |             |                |                           |
|             | HLA-B*78:01 |             |                |                           |
|             | HLA-B*78:02 |             |                |                           |
|             | HLA-B*81:01 |             |                |                           |
|             | HLA-B*82:01 |             |                |                           |
|             | HLA-B*82:02 |             |                |                           |
