# Supplementary material
Source: PubMed Central journal article supplement (PMC7300650)
Supplement: TAN-96-277-s010.pdf [file TAN-96-277-s010.pdf]

# Binding affinities of 438 HLA Class I and II proteins to the complete proteomes of seven (potentially) pandemic viruses and distributions of strongest and weakest HLA peptide binders in human populations worldwide

## Supplementary material 4

### Extended results for the binding predictions for A/H1N1

#### Table of Contents

|                                                                                                            |    |
|------------------------------------------------------------------------------------------------------------|----|
| TOTAL NUMBER OF PEPTIDES WITH STRONG, REGULAR AND WEAK BINDING PREDICTIONS FOR <i>HLA-A</i> .....          | 2  |
| GENERAL BINDING PREDICTION TENDENCIES FOR <i>HLA-A</i> .....                                               | 4  |
| <i>HLA-A</i> ALLELES ORDERED BY NUMBER OF PRESENTED PEPTIDES WITH STRONG BINDING PREDICTION .....          | 5  |
| <i>HLA-A</i> ALLELES ORDERED BY NUMBER OF PRESENTED PEPTIDES WITH REGULAR BINDING PREDICTION.....          | 6  |
| <i>HLA-A</i> ALLELES ORDERED BY NUMBER OF PRESENTED PEPTIDES WITH WEAK BINDING PREDICTION.....             | 7  |
| TOTAL NUMBER OF PEPTIDES WITH STRONG, REGULAR AND WEAK BINDING PREDICTIONS FOR <i>HLA-B</i> .....          | 8  |
| GENERAL BINDING PREDICTION TENDENCIES FOR <i>HLA-B</i> .....                                               | 11 |
| <i>HLA-B</i> ALLELES ORDERED BY NUMBER OF PRESENTED PEPTIDES WITH STRONG BINDING PREDICTION .....          | 12 |
| <i>HLA-B</i> ALLELES ORDERED BY NUMBER OF PRESENTED PEPTIDES WITH REGULAR BINDING PREDICTION.....          | 13 |
| <i>HLA-B</i> ALLELES ORDERED BY NUMBER OF PRESENTED PEPTIDES WITH WEAK BINDING PREDICTION.....             | 14 |
| TOTAL NUMBER OF PEPTIDES WITH STRONG, REGULAR AND WEAK BINDING PREDICTIONS FOR <i>HLA-C</i> .....          | 15 |
| GENERAL BINDING PREDICTION TENDENCIES FOR <i>HLA-C</i> .....                                               | 16 |
| <i>HLA-C</i> ALLELES ORDERED BY NUMBER OF PRESENTED PEPTIDES WITH STRONG BINDING PREDICTION .....          | 17 |
| <i>HLA-C</i> ALLELES ORDERED BY NUMBER OF PRESENTED PEPTIDES WITH REGULAR BINDING PREDICTION.....          | 18 |
| <i>HLA-C</i> ALLELES ORDERED BY NUMBER OF PRESENTED PEPTIDES WITH WEAK BINDING PREDICTION .....            | 19 |
| TOTAL NUMBER OF PEPTIDES WITH STRONG, REGULAR AND WEAK BINDING PREDICTIONS FOR <i>HLA-DRB1</i> .....       | 20 |
| GENERAL BINDING PREDICTION TENDENCIES FOR <i>HLA-DRB1</i> .....                                            | 22 |
| <i>HLA-DRB1</i> ALLELES ORDERED BY NUMBER OF PRESENTED PEPTIDES WITH STRONG BINDING PREDICTION .....       | 23 |
| <i>HLA-DRB1</i> ALLELES ORDERED BY NUMBER OF PRESENTED PEPTIDES WITH REGULAR BINDING PREDICTION .....      | 24 |
| <i>HLA-DRB1</i> ALLELES ORDERED BY NUMBER OF PRESENTED PEPTIDES WITH WEAK BINDING PREDICTION .....         | 25 |
| TOTAL NUMBER OF PEPTIDES WITH STRONG, REGULAR AND WEAK BINDING PREDICTIONS FOR <i>HLA-DQA1/-DQB1</i> ....  | 26 |
| GENERAL BINDING PREDICTION TENDENCIES FOR <i>HLA-DQA1/-DQB1</i> .....                                      | 27 |
| <i>HLA-DQA1/-DQB1</i> ALLELES ORDERED BY NUMBER OF PRESENTED PEPTIDES WITH STRONG BINDING PREDICTION ..... | 28 |
| <i>HLA-DQA1/-DQB1</i> ALLELES ORDERED BY NUMBER OF PRESENTED PEPTIDES WITH REGULAR BINDING PREDICTION....  | 29 |
| <i>HLA-DQA1/-DQB1</i> ALLELES ORDERED BY NUMBER OF PRESENTED PEPTIDES WITH WEAK BINDING PREDICTION .....   | 30 |

## Total number of peptides with strong, regular and weak binding predictions for *HLA-A*

|             | <b>IC<sub>50</sub> ≤ 50 nM</b><br>Strong binders | <b>50 nM &lt; IC<sub>50</sub> ≤ 500 nM</b><br>Regular binders | <b>500 nM &lt; IC<sub>50</sub> ≤ 5000 nM</b><br>Weak binders | <b>IC<sub>50</sub> &gt; 5000 nM</b><br>Non binders |
|-------------|--------------------------------------------------|---------------------------------------------------------------|--------------------------------------------------------------|----------------------------------------------------|
| HLA-A*01:01 | 4                                                | 15                                                            | 51                                                           | 4401                                               |
| HLA-A*01:02 | 1                                                | 13                                                            | 95                                                           | 4362                                               |
| HLA-A*01:03 | 3                                                | 16                                                            | 45                                                           | 4407                                               |
| HLA-A*01:06 | 3                                                | 12                                                            | 72                                                           | 4384                                               |
| HLA-A*02:01 | 43                                               | 89                                                            | 247                                                          | 4092                                               |
| HLA-A*02:02 | 64                                               | 159                                                           | 409                                                          | 3839                                               |
| HLA-A*02:03 | 78                                               | 156                                                           | 368                                                          | 3869                                               |
| HLA-A*02:04 | 9                                                | 45                                                            | 166                                                          | 4251                                               |
| HLA-A*02:05 | 31                                               | 149                                                           | 515                                                          | 3776                                               |
| HLA-A*02:06 | 60                                               | 152                                                           | 458                                                          | 3801                                               |
| HLA-A*02:07 | 1                                                | 9                                                             | 57                                                           | 4404                                               |
| HLA-A*02:08 | 16                                               | 123                                                           | 518                                                          | 3814                                               |
| HLA-A*02:09 | 43                                               | 89                                                            | 247                                                          | 4092                                               |
| HLA-A*02:10 | 13                                               | 64                                                            | 294                                                          | 4100                                               |
| HLA-A*02:11 | 125                                              | 154                                                           | 379                                                          | 3813                                               |
| HLA-A*02:12 | 56                                               | 94                                                            | 224                                                          | 4097                                               |
| HLA-A*02:14 | 34                                               | 125                                                           | 436                                                          | 3876                                               |
| HLA-A*02:17 | 5                                                | 34                                                            | 139                                                          | 4293                                               |
| HLA-A*02:19 | 26                                               | 68                                                            | 172                                                          | 4205                                               |
| HLA-A*02:20 | 28                                               | 72                                                            | 249                                                          | 4122                                               |
| HLA-A*02:22 | 88                                               | 171                                                           | 415                                                          | 3797                                               |
| HLA-A*02:24 | 43                                               | 89                                                            | 247                                                          | 4092                                               |
| HLA-A*02:26 | 36                                               | 109                                                           | 241                                                          | 4085                                               |
| HLA-A*02:34 | 29                                               | 77                                                            | 233                                                          | 4132                                               |
| HLA-A*02:35 | 41                                               | 109                                                           | 332                                                          | 3989                                               |
| HLA-A*02:36 | 26                                               | 55                                                            | 189                                                          | 4201                                               |
| HLA-A*02:40 | 43                                               | 89                                                            | 247                                                          | 4092                                               |
| HLA-A*03:01 | 19                                               | 63                                                            | 170                                                          | 4219                                               |
| HLA-A*03:02 | 18                                               | 78                                                            | 208                                                          | 4167                                               |
| HLA-A*03:05 | 19                                               | 63                                                            | 170                                                          | 4219                                               |
| HLA-A*03:08 | 5                                                | 53                                                            | 168                                                          | 4245                                               |
| HLA-A*11:01 | 32                                               | 100                                                           | 203                                                          | 4136                                               |
| HLA-A*11:02 | 32                                               | 100                                                           | 203                                                          | 4136                                               |
| HLA-A*11:03 | 25                                               | 105                                                           | 247                                                          | 4094                                               |
| HLA-A*11:04 | 25                                               | 105                                                           | 208                                                          | 4133                                               |
| HLA-A*11:06 | 12                                               | 90                                                            | 222                                                          | 4147                                               |
| HLA-A*11:12 | 32                                               | 100                                                           | 203                                                          | 4136                                               |
| HLA-A*23:01 | 15                                               | 44                                                            | 171                                                          | 4241                                               |
| HLA-A*23:03 | 15                                               | 44                                                            | 171                                                          | 4241                                               |
| HLA-A*23:04 | 38                                               | 107                                                           | 255                                                          | 4071                                               |
| HLA-A*24:02 | 8                                                | 34                                                            | 127                                                          | 4302                                               |
| HLA-A*24:03 | 33                                               | 89                                                            | 201                                                          | 4148                                               |
| HLA-A*24:04 | 1                                                | 24                                                            | 118                                                          | 4328                                               |
| HLA-A*24:05 | 8                                                | 34                                                            | 127                                                          | 4302                                               |
| HLA-A*24:06 | 5                                                | 36                                                            | 151                                                          | 4279                                               |
| HLA-A*24:07 | 4                                                | 29                                                            | 119                                                          | 4319                                               |
| HLA-A*24:08 | 2                                                | 34                                                            | 144                                                          | 4291                                               |
| HLA-A*24:10 | 28                                               | 93                                                            | 230                                                          | 4120                                               |
| HLA-A*24:13 | 15                                               | 44                                                            | 171                                                          | 4241                                               |
| HLA-A*24:20 | 8                                                | 34                                                            | 127                                                          | 4302                                               |
| HLA-A*24:21 | 8                                                | 34                                                            | 127                                                          | 4302                                               |
| HLA-A*24:23 | 33                                               | 89                                                            | 201                                                          | 4148                                               |
| HLA-A*25:01 | 0                                                | 7                                                             | 78                                                           | 4386                                               |
| HLA-A*25:02 | 0                                                | 7                                                             | 83                                                           | 4381                                               |
| HLA-A*26:01 | 3                                                | 24                                                            | 114                                                          | 4330                                               |
| HLA-A*26:02 | 31                                               | 89                                                            | 286                                                          | 4065                                               |
| HLA-A*26:03 | 0                                                | 24                                                            | 180                                                          | 4267                                               |
| HLA-A*26:05 | 2                                                | 17                                                            | 130                                                          | 4322                                               |
| HLA-A*26:08 | 1                                                | 38                                                            | 168                                                          | 4264                                               |
| HLA-A*26:12 | 1                                                | 31                                                            | 149                                                          | 4290                                               |
| HLA-A*26:18 | 1                                                | 31                                                            | 149                                                          | 4290                                               |
| HLA-A*29:01 | 19                                               | 49                                                            | 168                                                          | 4235                                               |

|             | <b>IC<sub>50</sub> ≤ 50 nM</b><br><b>Strong binders</b> | <b>50 nM &lt; IC<sub>50</sub> ≤ 500 nM</b><br><b>Regular binders</b> | <b>500 nM &lt; IC<sub>50</sub> ≤ 5000 nM</b><br><b>Weak binders</b> | <b>IC<sub>50</sub> &gt; 5000 nM</b><br><b>Non binders</b> |
|-------------|---------------------------------------------------------|----------------------------------------------------------------------|---------------------------------------------------------------------|-----------------------------------------------------------|
| HLA-A*29:02 | 19                                                      | 49                                                                   | 168                                                                 | 4235                                                      |
| HLA-A*30:01 | 57                                                      | 213                                                                  | 738                                                                 | 3463                                                      |
| HLA-A*30:02 | 9                                                       | 61                                                                   | 222                                                                 | 4179                                                      |
| HLA-A*30:04 | 0                                                       | 32                                                                   | 366                                                                 | 4073                                                      |
| HLA-A*30:08 | 2                                                       | 51                                                                   | 329                                                                 | 4089                                                      |
| HLA-A*31:01 | 56                                                      | 127                                                                  | 262                                                                 | 4026                                                      |
| HLA-A*31:02 | 48                                                      | 126                                                                  | 291                                                                 | 4006                                                      |
| HLA-A*31:04 | 78                                                      | 147                                                                  | 329                                                                 | 3917                                                      |
| HLA-A*31:08 | 19                                                      | 111                                                                  | 387                                                                 | 3954                                                      |
| HLA-A*32:01 | 26                                                      | 73                                                                   | 310                                                                 | 4062                                                      |
| HLA-A*32:02 | 10                                                      | 58                                                                   | 267                                                                 | 4136                                                      |
| HLA-A*32:03 | 8                                                       | 53                                                                   | 240                                                                 | 4170                                                      |
| HLA-A*33:01 | 17                                                      | 70                                                                   | 168                                                                 | 4216                                                      |
| HLA-A*33:03 | 30                                                      | 91                                                                   | 207                                                                 | 4143                                                      |
| HLA-A*34:01 | 1                                                       | 56                                                                   | 401                                                                 | 4013                                                      |
| HLA-A*34:02 | 11                                                      | 86                                                                   | 282                                                                 | 4092                                                      |
| HLA-A*36:01 | 2                                                       | 23                                                                   | 123                                                                 | 4323                                                      |
| HLA-A*43:01 | 1                                                       | 23                                                                   | 155                                                                 | 4292                                                      |
| HLA-A*66:01 | 0                                                       | 27                                                                   | 229                                                                 | 4215                                                      |
| HLA-A*66:02 | 1                                                       | 47                                                                   | 361                                                                 | 4062                                                      |
| HLA-A*66:03 | 0                                                       | 34                                                                   | 288                                                                 | 4149                                                      |
| HLA-A*68:01 | 50                                                      | 121                                                                  | 310                                                                 | 3990                                                      |
| HLA-A*68:02 | 36                                                      | 112                                                                  | 368                                                                 | 3955                                                      |
| HLA-A*68:03 | 25                                                      | 99                                                                   | 246                                                                 | 4101                                                      |
| HLA-A*68:06 | 3                                                       | 35                                                                   | 328                                                                 | 4105                                                      |
| HLA-A*68:12 | 50                                                      | 121                                                                  | 310                                                                 | 3990                                                      |
| HLA-A*69:01 | 22                                                      | 71                                                                   | 325                                                                 | 4053                                                      |
| HLA-A*74:01 | 5                                                       | 34                                                                   | 146                                                                 | 4286                                                      |
| HLA-A*74:03 | 5                                                       | 34                                                                   | 146                                                                 | 4286                                                      |
| HLA-A*80:01 | 6                                                       | 17                                                                   | 63                                                                  | 4385                                                      |

Alleles are ordered alphabetically.

## General binding prediction tendencies for *HLA-A*

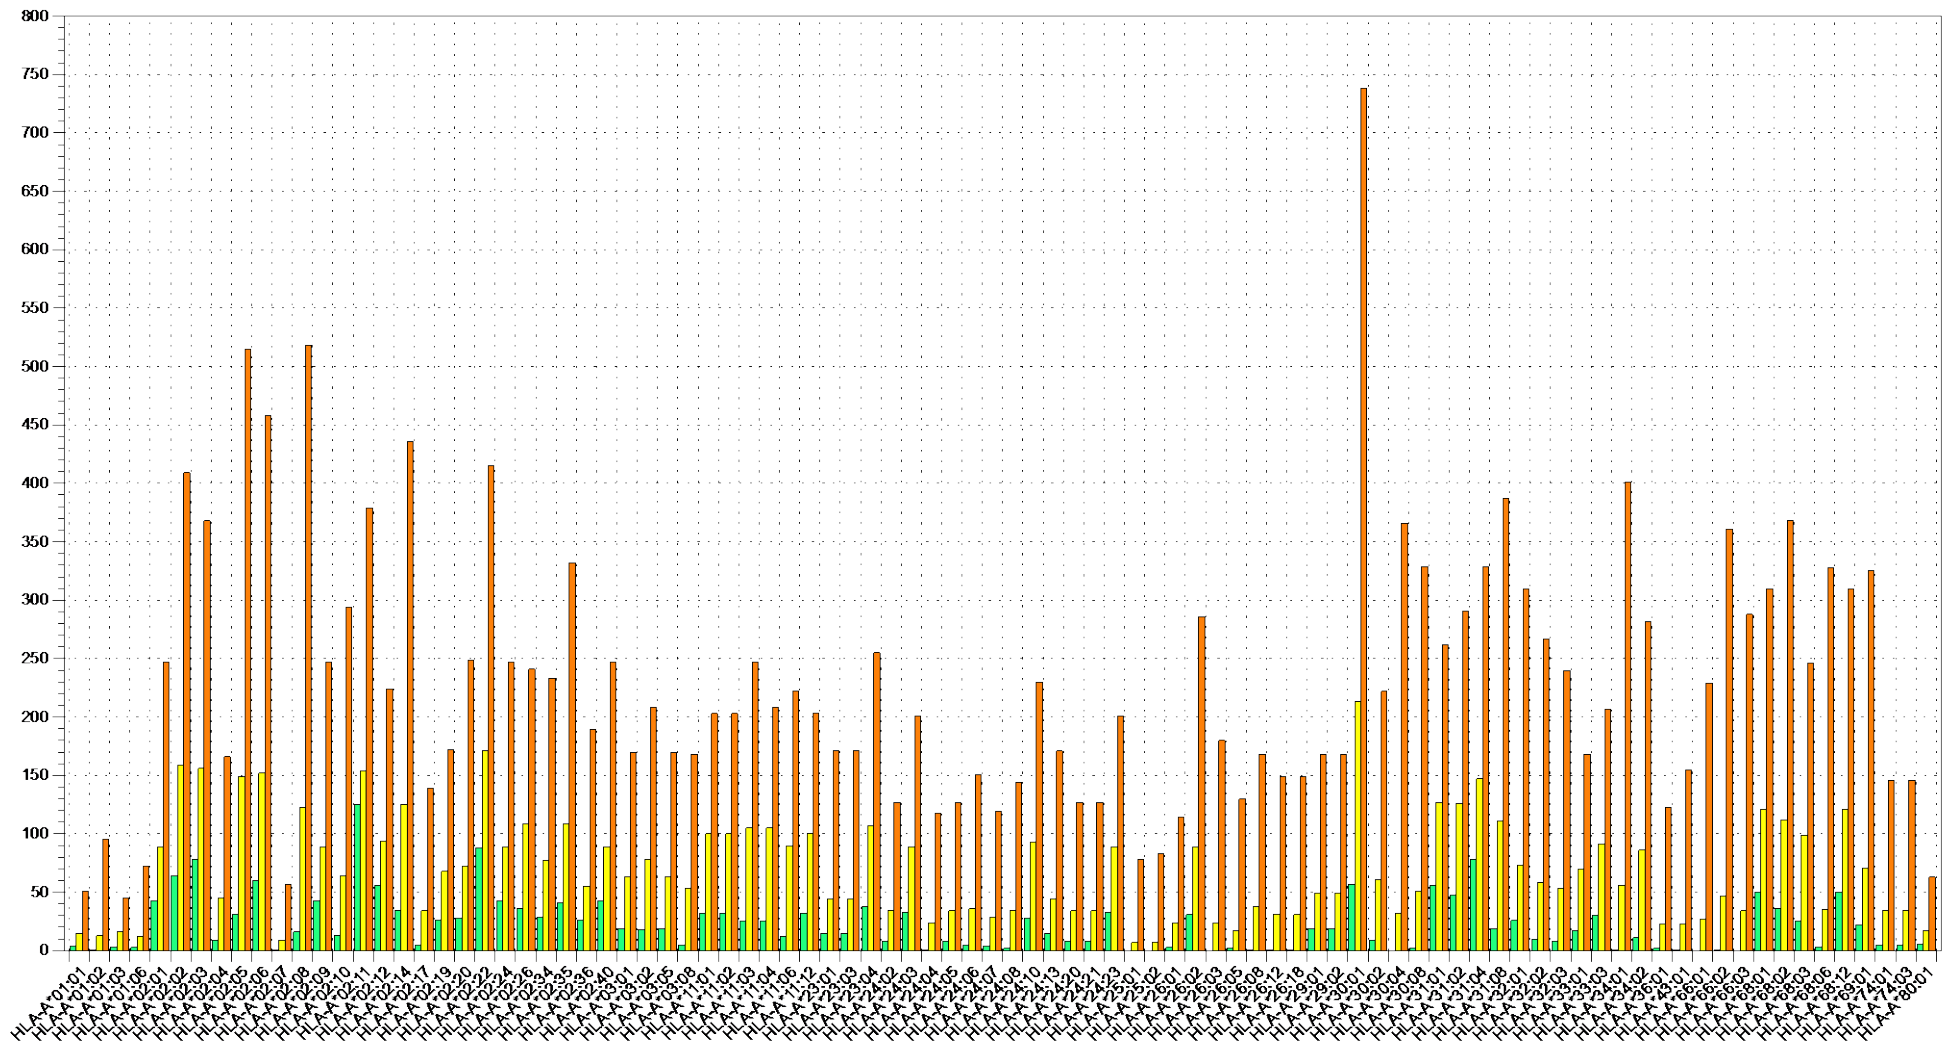

Alleles are ordered alphabetically on the x-axis, while the number of peptides binding with strong ( $IC_{50} \leq 50$  nM), regular ( $50$  nM  $< IC_{50} \leq 500$  nM) and weak ( $500$  nM  $< IC_{50} \leq 5000$  nM) binding prediction are displayed on the y-axis.



## HLA-A alleles ordered by number of presented peptides with regular binding prediction

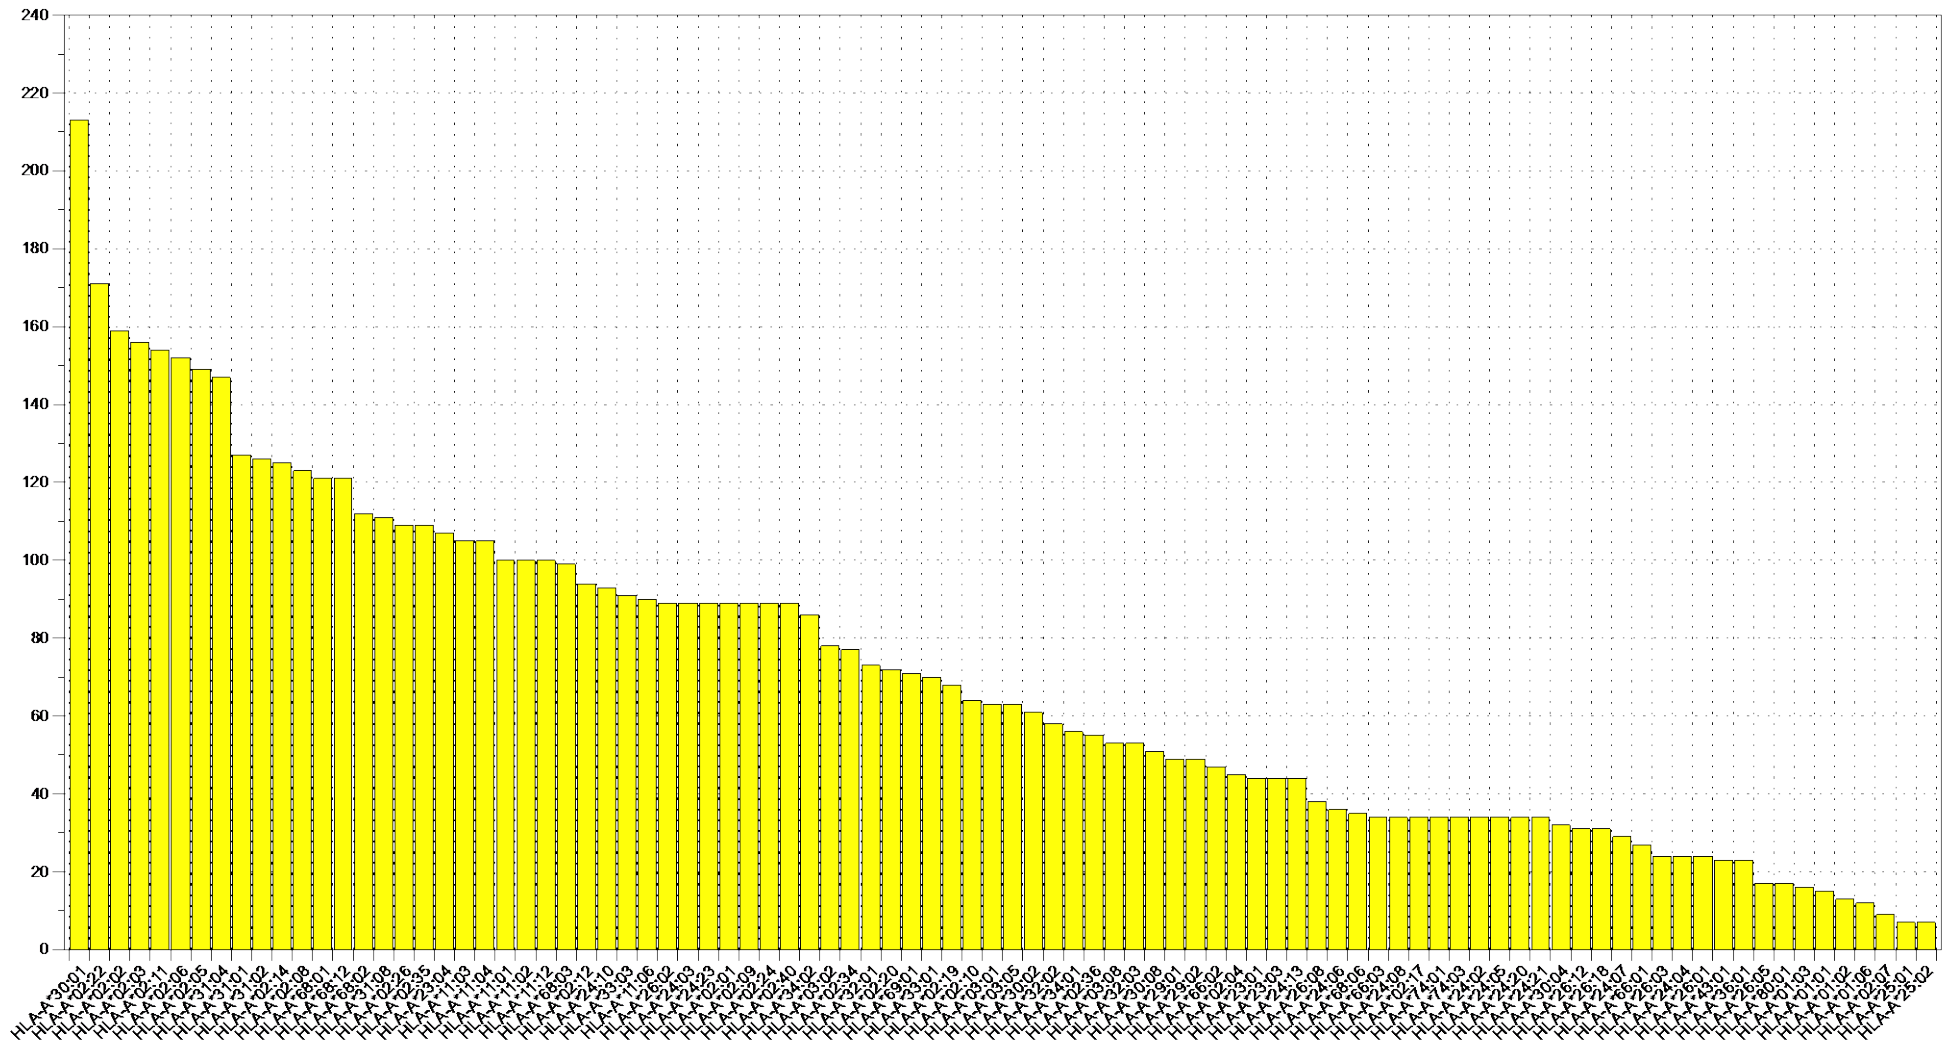

Alleles are ordered on the x-axis by their regular ( $50 \text{ nM} < IC_{50} \leq 500 \text{ nM}$ ) binding prediction and the number of peptides presented are displayed on the y-axis.

## HLA-A alleles ordered by number of presented peptides with weak binding prediction

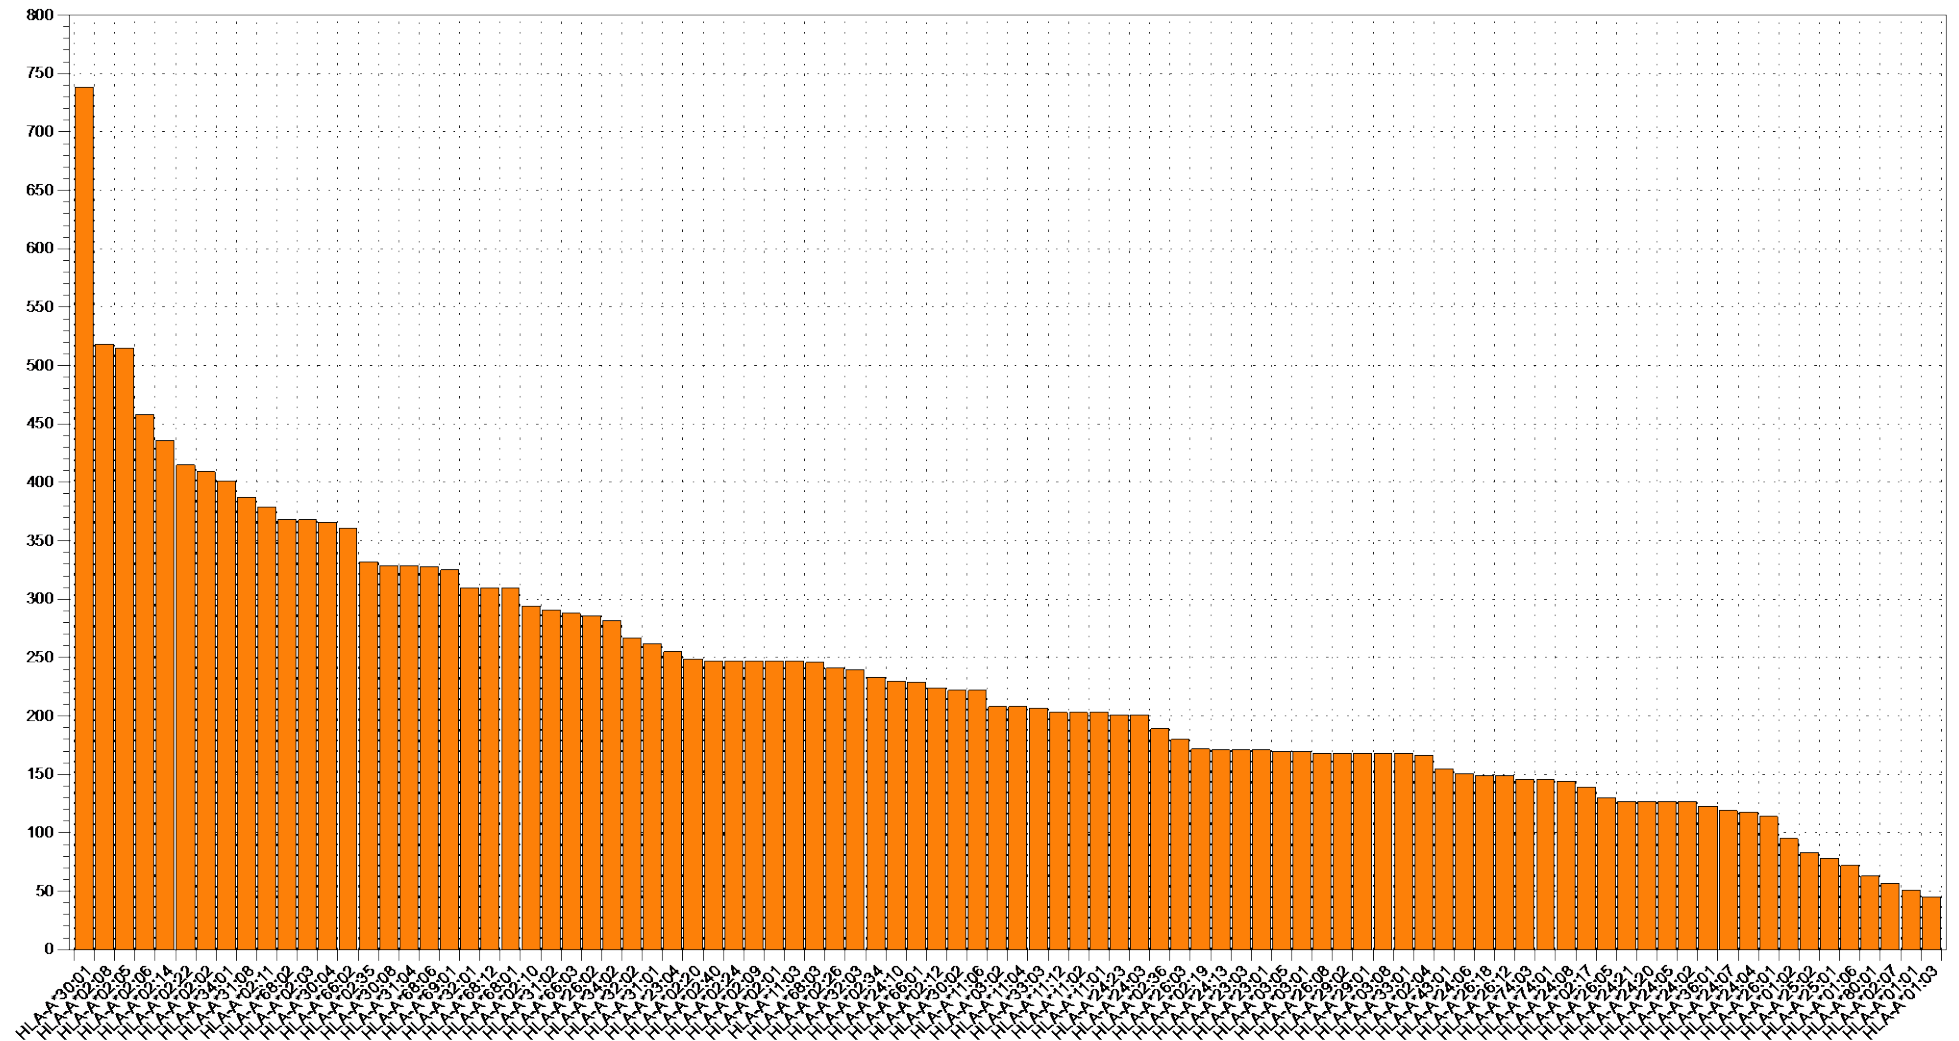

Alleles are ordered on the x-axis by their weak ( $500 \text{ nM} < \text{IC}_{50} \leq 5000 \text{ nM}$ ) binding prediction and the number of peptides presented are displayed on the y-axis.

## Total number of peptides with strong, regular and weak binding predictions for *HLA-B*

|             | <b>IC<sub>50</sub> ≤ 50 nM</b><br>Strong binders | <b>50 nM &lt; IC<sub>50</sub> ≤ 500 nM</b><br>Regular binders | <b>500 nM &lt; IC<sub>50</sub> ≤ 5000 nM</b><br>Weak binders | <b>IC<sub>50</sub> &gt; 5000 nM</b><br>Non binders |
|-------------|--------------------------------------------------|---------------------------------------------------------------|--------------------------------------------------------------|----------------------------------------------------|
| HLA-B*07:02 | 8                                                | 47                                                            | 153                                                          | 4263                                               |
| HLA-B*07:04 | 6                                                | 50                                                            | 183                                                          | 4232                                               |
| HLA-B*07:05 | 14                                               | 47                                                            | 196                                                          | 4214                                               |
| HLA-B*07:06 | 14                                               | 47                                                            | 196                                                          | 4214                                               |
| HLA-B*08:01 | 12                                               | 57                                                            | 300                                                          | 4102                                               |
| HLA-B*08:03 | 0                                                | 2                                                             | 32                                                           | 4437                                               |
| HLA-B*08:04 | 1                                                | 31                                                            | 284                                                          | 4155                                               |
| HLA-B*08:05 | 2                                                | 35                                                            | 243                                                          | 4191                                               |
| HLA-B*13:01 | 3                                                | 54                                                            | 354                                                          | 4060                                               |
| HLA-B*13:02 | 0                                                | 10                                                            | 177                                                          | 4284                                               |
| HLA-B*13:03 | 0                                                | 8                                                             | 203                                                          | 4260                                               |
| HLA-B*13:04 | 0                                                | 20                                                            | 330                                                          | 4121                                               |
| HLA-B*14:01 | 0                                                | 9                                                             | 134                                                          | 4328                                               |
| HLA-B*14:02 | 0                                                | 9                                                             | 134                                                          | 4328                                               |
| HLA-B*14:03 | 0                                                | 6                                                             | 145                                                          | 4320                                               |
| HLA-B*15:01 | 32                                               | 114                                                           | 355                                                          | 3970                                               |
| HLA-B*15:02 | 15                                               | 79                                                            | 303                                                          | 4074                                               |
| HLA-B*15:03 | 118                                              | 248                                                           | 687                                                          | 3418                                               |
| HLA-B*15:04 | 0                                                | 20                                                            | 362                                                          | 4089                                               |
| HLA-B*15:05 | 22                                               | 114                                                           | 424                                                          | 3911                                               |
| HLA-B*15:06 | 27                                               | 129                                                           | 363                                                          | 3952                                               |
| HLA-B*15:07 | 11                                               | 109                                                           | 340                                                          | 4011                                               |
| HLA-B*15:08 | 3                                                | 31                                                            | 170                                                          | 4267                                               |
| HLA-B*15:09 | 0                                                | 5                                                             | 61                                                           | 4405                                               |
| HLA-B*15:10 | 0                                                | 5                                                             | 60                                                           | 4406                                               |
| HLA-B*15:11 | 3                                                | 29                                                            | 171                                                          | 4268                                               |
| HLA-B*15:12 | 3                                                | 42                                                            | 239                                                          | 4187                                               |
| HLA-B*15:13 | 0                                                | 27                                                            | 280                                                          | 4164                                               |
| HLA-B*15:15 | 6                                                | 67                                                            | 285                                                          | 4113                                               |
| HLA-B*15:16 | 22                                               | 138                                                           | 344                                                          | 3967                                               |
| HLA-B*15:17 | 105                                              | 146                                                           | 330                                                          | 3890                                               |
| HLA-B*15:18 | 3                                                | 21                                                            | 205                                                          | 4242                                               |
| HLA-B*15:20 | 22                                               | 112                                                           | 415                                                          | 3922                                               |
| HLA-B*15:21 | 2                                                | 14                                                            | 146                                                          | 4309                                               |
| HLA-B*15:24 | 0                                                | 42                                                            | 329                                                          | 4100                                               |
| HLA-B*15:25 | 56                                               | 129                                                           | 417                                                          | 3869                                               |
| HLA-B*15:27 | 14                                               | 95                                                            | 283                                                          | 4079                                               |
| HLA-B*15:29 | 40                                               | 131                                                           | 533                                                          | 3767                                               |
| HLA-B*15:31 | 8                                                | 81                                                            | 312                                                          | 4070                                               |
| HLA-B*15:32 | 21                                               | 140                                                           | 435                                                          | 3875                                               |
| HLA-B*15:34 | 32                                               | 114                                                           | 355                                                          | 3970                                               |
| HLA-B*15:35 | 6                                                | 102                                                           | 303                                                          | 4060                                               |
| HLA-B*15:38 | 21                                               | 112                                                           | 384                                                          | 3954                                               |
| HLA-B*15:39 | 60                                               | 132                                                           | 437                                                          | 3842                                               |
| HLA-B*15:40 | 6                                                | 77                                                            | 295                                                          | 4093                                               |
| HLA-B*15:58 | 0                                                | 10                                                            | 194                                                          | 4267                                               |
| HLA-B*18:01 | 6                                                | 33                                                            | 158                                                          | 4274                                               |
| HLA-B*18:02 | 3                                                | 37                                                            | 222                                                          | 4209                                               |
| HLA-B*18:03 | 2                                                | 31                                                            | 194                                                          | 4244                                               |
| HLA-B*18:05 | 6                                                | 33                                                            | 158                                                          | 4274                                               |
| HLA-B*18:07 | 2                                                | 16                                                            | 175                                                          | 4278                                               |
| HLA-B*27:02 | 1                                                | 19                                                            | 63                                                           | 4388                                               |
| HLA-B*27:03 | 0                                                | 10                                                            | 55                                                           | 4406                                               |
| HLA-B*27:04 | 3                                                | 20                                                            | 104                                                          | 4344                                               |
| HLA-B*27:05 | 17                                               | 65                                                            | 184                                                          | 4205                                               |
| HLA-B*27:06 | 22                                               | 53                                                            | 177                                                          | 4219                                               |
| HLA-B*27:07 | 29                                               | 69                                                            | 266                                                          | 4107                                               |
| HLA-B*27:08 | 15                                               | 46                                                            | 196                                                          | 4214                                               |
| HLA-B*27:09 | 21                                               | 53                                                            | 210                                                          | 4187                                               |
| HLA-B*27:12 | 14                                               | 73                                                            | 253                                                          | 4131                                               |
| HLA-B*27:14 | 0                                                | 24                                                            | 137                                                          | 4310                                               |
| HLA-B*35:01 | 29                                               | 70                                                            | 267                                                          | 4105                                               |



|             | IC <sub>50</sub> ≤ 50 nM<br>Strong binders | 50 nM < IC <sub>50</sub> ≤ 500 nM<br>Regular binders | 500 nM < IC <sub>50</sub> ≤ 5000 nM<br>Weak binders | IC <sub>50</sub> > 5000 nM<br>Non binders |
|-------------|--------------------------------------------|------------------------------------------------------|-----------------------------------------------------|-------------------------------------------|
| HLA-B*35:02 | 4                                          | 12                                                   | 83                                                  | 4372                                      |
| HLA-B*35:03 | 2                                          | 10                                                   | 50                                                  | 4409                                      |
| HLA-B*35:04 | 4                                          | 12                                                   | 83                                                  | 4372                                      |
| HLA-B*35:05 | 17                                         | 80                                                   | 333                                                 | 4041                                      |
| HLA-B*35:06 | 0                                          | 11                                                   | 39                                                  | 4421                                      |
| HLA-B*35:08 | 6                                          | 36                                                   | 141                                                 | 4288                                      |
| HLA-B*35:09 | 4                                          | 12                                                   | 83                                                  | 4372                                      |
| HLA-B*35:10 | 61                                         | 178                                                  | 491                                                 | 3741                                      |
| HLA-B*35:11 | 29                                         | 98                                                   | 369                                                 | 3975                                      |
| HLA-B*35:12 | 4                                          | 12                                                   | 83                                                  | 4372                                      |
| HLA-B*35:17 | 16                                         | 73                                                   | 292                                                 | 4090                                      |
| HLA-B*35:19 | 35                                         | 90                                                   | 359                                                 | 3987                                      |
| HLA-B*35:20 | 11                                         | 89                                                   | 332                                                 | 4039                                      |
| HLA-B*35:21 | 16                                         | 88                                                   | 344                                                 | 4023                                      |
| HLA-B*35:32 | 32                                         | 73                                                   | 300                                                 | 4066                                      |
| HLA-B*35:43 | 11                                         | 71                                                   | 298                                                 | 4091                                      |
| HLA-B*37:01 | 0                                          | 14                                                   | 120                                                 | 4337                                      |
| HLA-B*38:01 | 0                                          | 6                                                    | 105                                                 | 4360                                      |
| HLA-B*38:02 | 0                                          | 7                                                    | 120                                                 | 4344                                      |
| HLA-B*39:01 | 11                                         | 52                                                   | 213                                                 | 4195                                      |
| HLA-B*39:02 | 28                                         | 119                                                  | 476                                                 | 3848                                      |
| HLA-B*39:03 | 9                                          | 59                                                   | 223                                                 | 4180                                      |
| HLA-B*39:04 | 11                                         | 52                                                   | 213                                                 | 4195                                      |
| HLA-B*39:05 | 1                                          | 17                                                   | 100                                                 | 4353                                      |
| HLA-B*39:06 | 1                                          | 17                                                   | 150                                                 | 4303                                      |
| HLA-B*39:07 | 6                                          | 49                                                   | 297                                                 | 4119                                      |
| HLA-B*39:09 | 9                                          | 44                                                   | 271                                                 | 4147                                      |
| HLA-B*39:10 | 11                                         | 50                                                   | 296                                                 | 4114                                      |
| HLA-B*39:15 | 6                                          | 53                                                   | 186                                                 | 4226                                      |
| HLA-B*39:24 | 9                                          | 59                                                   | 223                                                 | 4180                                      |
| HLA-B*40:01 | 15                                         | 29                                                   | 100                                                 | 4327                                      |
| HLA-B*40:02 | 16                                         | 60                                                   | 189                                                 | 4206                                      |
| HLA-B*40:03 | 4                                          | 49                                                   | 236                                                 | 4182                                      |
| HLA-B*40:04 | 20                                         | 51                                                   | 163                                                 | 4237                                      |
| HLA-B*40:05 | 6                                          | 54                                                   | 249                                                 | 4162                                      |
| HLA-B*40:06 | 0                                          | 29                                                   | 113                                                 | 4329                                      |
| HLA-B*40:09 | 11                                         | 53                                                   | 175                                                 | 4232                                      |
| HLA-B*40:10 | 1                                          | 23                                                   | 88                                                  | 4359                                      |
| HLA-B*40:11 | 21                                         | 50                                                   | 164                                                 | 4236                                      |
| HLA-B*40:12 | 0                                          | 17                                                   | 83                                                  | 4371                                      |
| HLA-B*40:14 | 21                                         | 50                                                   | 164                                                 | 4236                                      |
| HLA-B*40:16 | 6                                          | 39                                                   | 196                                                 | 4230                                      |
| HLA-B*40:40 | 5                                          | 53                                                   | 220                                                 | 4193                                      |
| HLA-B*41:01 | 8                                          | 46                                                   | 159                                                 | 4258                                      |
| HLA-B*41:02 | 14                                         | 62                                                   | 221                                                 | 4174                                      |
| HLA-B*42:01 | 23                                         | 63                                                   | 305                                                 | 4080                                      |
| HLA-B*42:02 | 0                                          | 39                                                   | 205                                                 | 4227                                      |
| HLA-B*44:02 | 7                                          | 26                                                   | 93                                                  | 4345                                      |
| HLA-B*44:03 | 7                                          | 25                                                   | 100                                                 | 4339                                      |
| HLA-B*44:04 | 1                                          | 15                                                   | 77                                                  | 4378                                      |
| HLA-B*44:05 | 0                                          | 18                                                   | 68                                                  | 4385                                      |
| HLA-B*44:06 | 0                                          | 1                                                    | 44                                                  | 4426                                      |
| HLA-B*44:07 | 7                                          | 25                                                   | 100                                                 | 4339                                      |
| HLA-B*44:09 | 6                                          | 44                                                   | 197                                                 | 4224                                      |
| HLA-B*44:15 | 0                                          | 11                                                   | 73                                                  | 4387                                      |
| HLA-B*45:01 | 1                                          | 34                                                   | 129                                                 | 4307                                      |
| HLA-B*46:01 | 0                                          | 2                                                    | 44                                                  | 4425                                      |
| HLA-B*47:01 | 0                                          | 22                                                   | 292                                                 | 4157                                      |
| HLA-B*47:03 | 2                                          | 39                                                   | 258                                                 | 4172                                      |
| HLA-B*48:01 | 0                                          | 8                                                    | 76                                                  | 4387                                      |
| HLA-B*48:02 | 43                                         | 166                                                  | 582                                                 | 3680                                      |
| HLA-B*48:03 | 0                                          | 17                                                   | 83                                                  | 4371                                      |
| HLA-B*48:04 | 0                                          | 8                                                    | 76                                                  | 4387                                      |
| HLA-B*49:01 | 1                                          | 25                                                   | 85                                                  | 4360                                      |
| HLA-B*50:01 | 4                                          | 31                                                   | 165                                                 | 4271                                      |

|             | <b>IC<sub>50</sub> ≤ 50 nM</b><br><b>Strong binders</b> | <b>50 nM &lt; IC<sub>50</sub> ≤ 500 nM</b><br><b>Regular binders</b> | <b>500 nM &lt; IC<sub>50</sub> ≤ 5000 nM</b><br><b>Weak binders</b> | <b>IC<sub>50</sub> &gt; 5000 nM</b><br><b>Non binders</b> |
|-------------|---------------------------------------------------------|----------------------------------------------------------------------|---------------------------------------------------------------------|-----------------------------------------------------------|
| HLA-B*50:02 | 0                                                       | 20                                                                   | 102                                                                 | 4349                                                      |
| HLA-B*51:01 | 1                                                       | 9                                                                    | 46                                                                  | 4415                                                      |
| HLA-B*51:02 | 2                                                       | 8                                                                    | 72                                                                  | 4389                                                      |
| HLA-B*51:04 | 0                                                       | 5                                                                    | 86                                                                  | 4380                                                      |
| HLA-B*51:05 | 0                                                       | 3                                                                    | 30                                                                  | 4438                                                      |
| HLA-B*51:06 | 0                                                       | 8                                                                    | 100                                                                 | 4363                                                      |
| HLA-B*51:07 | 0                                                       | 0                                                                    | 27                                                                  | 4444                                                      |
| HLA-B*51:08 | 0                                                       | 4                                                                    | 42                                                                  | 4425                                                      |
| HLA-B*51:09 | 0                                                       | 4                                                                    | 47                                                                  | 4420                                                      |
| HLA-B*52:01 | 0                                                       | 3                                                                    | 72                                                                  | 4396                                                      |
| HLA-B*53:01 | 9                                                       | 32                                                                   | 159                                                                 | 4271                                                      |
| HLA-B*53:02 | 3                                                       | 30                                                                   | 157                                                                 | 4281                                                      |
| HLA-B*53:03 | 9                                                       | 71                                                                   | 358                                                                 | 4033                                                      |
| HLA-B*53:05 | 10                                                      | 36                                                                   | 159                                                                 | 4266                                                      |
| HLA-B*54:01 | 4                                                       | 17                                                                   | 114                                                                 | 4336                                                      |
| HLA-B*55:01 | 0                                                       | 15                                                                   | 107                                                                 | 4349                                                      |
| HLA-B*55:02 | 2                                                       | 24                                                                   | 159                                                                 | 4286                                                      |
| HLA-B*55:04 | 21                                                      | 65                                                                   | 359                                                                 | 4026                                                      |
| HLA-B*55:07 | 4                                                       | 17                                                                   | 114                                                                 | 4336                                                      |
| HLA-B*55:12 | 2                                                       | 18                                                                   | 157                                                                 | 4294                                                      |
| HLA-B*56:01 | 2                                                       | 18                                                                   | 143                                                                 | 4308                                                      |
| HLA-B*56:02 | 7                                                       | 38                                                                   | 259                                                                 | 4167                                                      |
| HLA-B*56:03 | 6                                                       | 60                                                                   | 403                                                                 | 4002                                                      |
| HLA-B*56:04 | 7                                                       | 38                                                                   | 259                                                                 | 4167                                                      |
| HLA-B*57:01 | 13                                                      | 53                                                                   | 212                                                                 | 4193                                                      |
| HLA-B*57:02 | 7                                                       | 39                                                                   | 172                                                                 | 4253                                                      |
| HLA-B*57:03 | 15                                                      | 71                                                                   | 227                                                                 | 4158                                                      |
| HLA-B*58:01 | 26                                                      | 83                                                                   | 277                                                                 | 4085                                                      |
| HLA-B*58:02 | 1                                                       | 4                                                                    | 36                                                                  | 4430                                                      |
| HLA-B*59:01 | 0                                                       | 9                                                                    | 107                                                                 | 4355                                                      |
| HLA-B*67:01 | 11                                                      | 38                                                                   | 215                                                                 | 4207                                                      |
| HLA-B*73:01 | 0                                                       | 5                                                                    | 73                                                                  | 4393                                                      |
| HLA-B*78:01 | 0                                                       | 7                                                                    | 113                                                                 | 4351                                                      |
| HLA-B*78:02 | 0                                                       | 6                                                                    | 54                                                                  | 4411                                                      |
| HLA-B*81:01 | 1                                                       | 14                                                                   | 80                                                                  | 4376                                                      |
| HLA-B*82:01 | 0                                                       | 1                                                                    | 65                                                                  | 4405                                                      |
| HLA-B*82:02 | 0                                                       | 1                                                                    | 65                                                                  | 4405                                                      |

Alleles are ordered alphabetically.

## General binding prediction tendencies for *HLA-B*

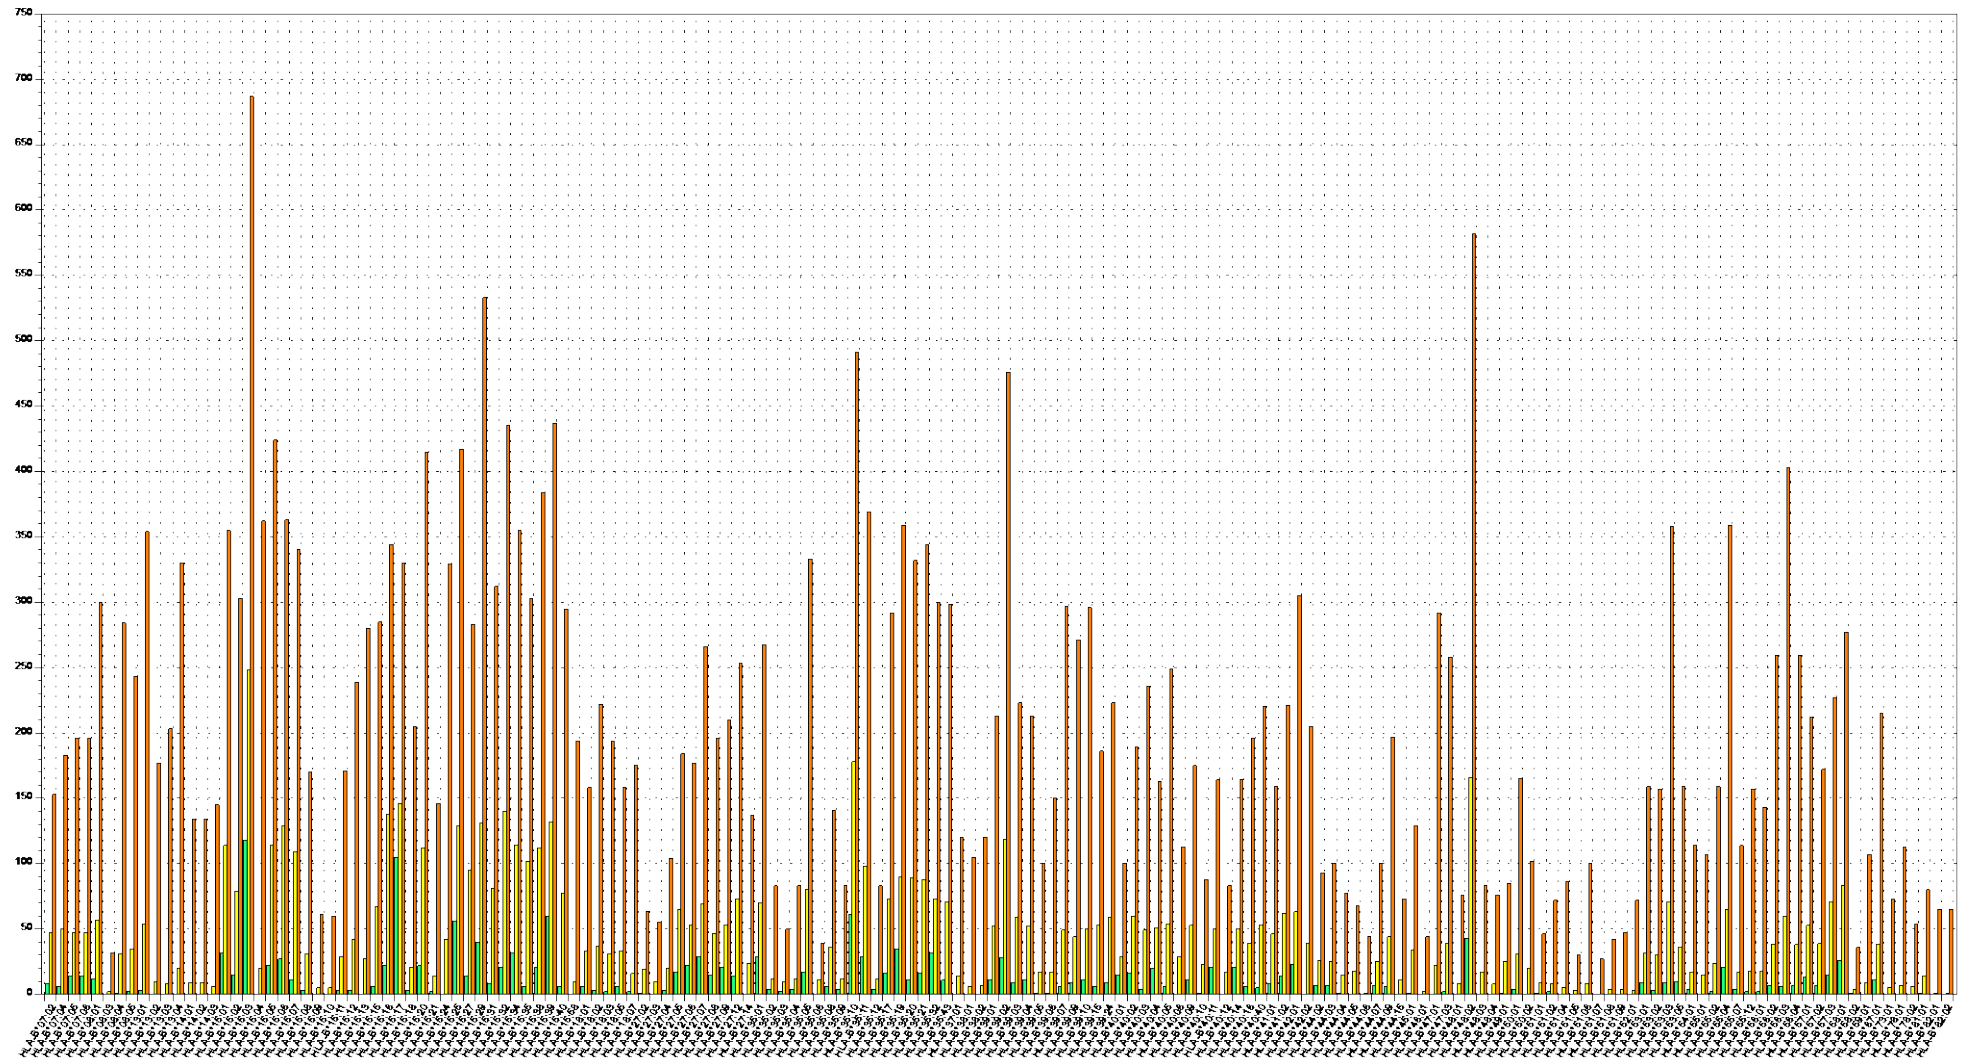

Alleles are ordered alphabetically on the x-axis, while the number of peptides binding with strong ( $IC_{50} \leq 50$  nM), regular ( $50$  nM  $< IC_{50} \leq 500$  nM) and weak ( $500$  nM  $< IC_{50} \leq 5000$  nM) binding prediction are displayed on the y-axis.



## HLA-B alleles ordered by number of presented peptides with regular binding prediction

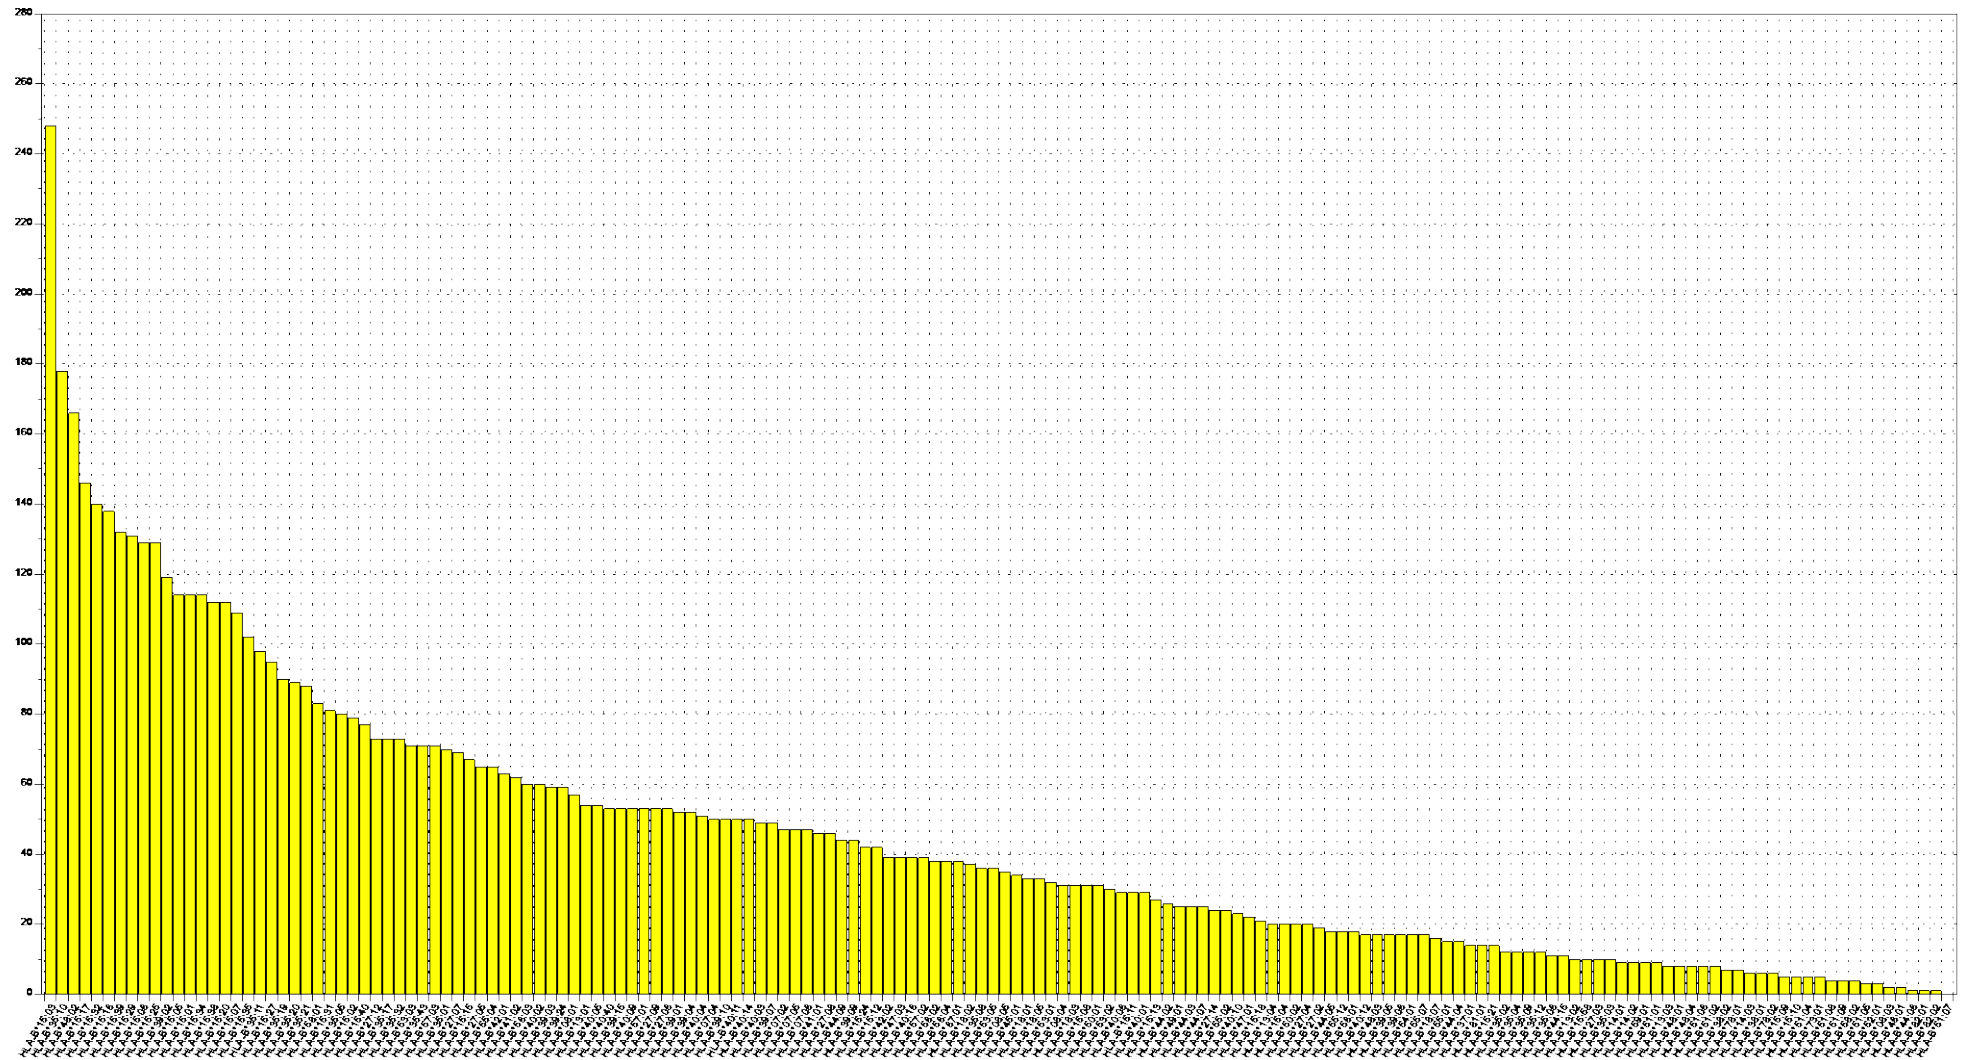

Alleles are ordered on the x-axis by their regular ( $50 \text{ nM} < IC_{50} \leq 500 \text{ nM}$ ) binding prediction and the number of peptides presented are displayed on the y-axis.

## HLA-B alleles ordered by number of presented peptides with weak binding prediction

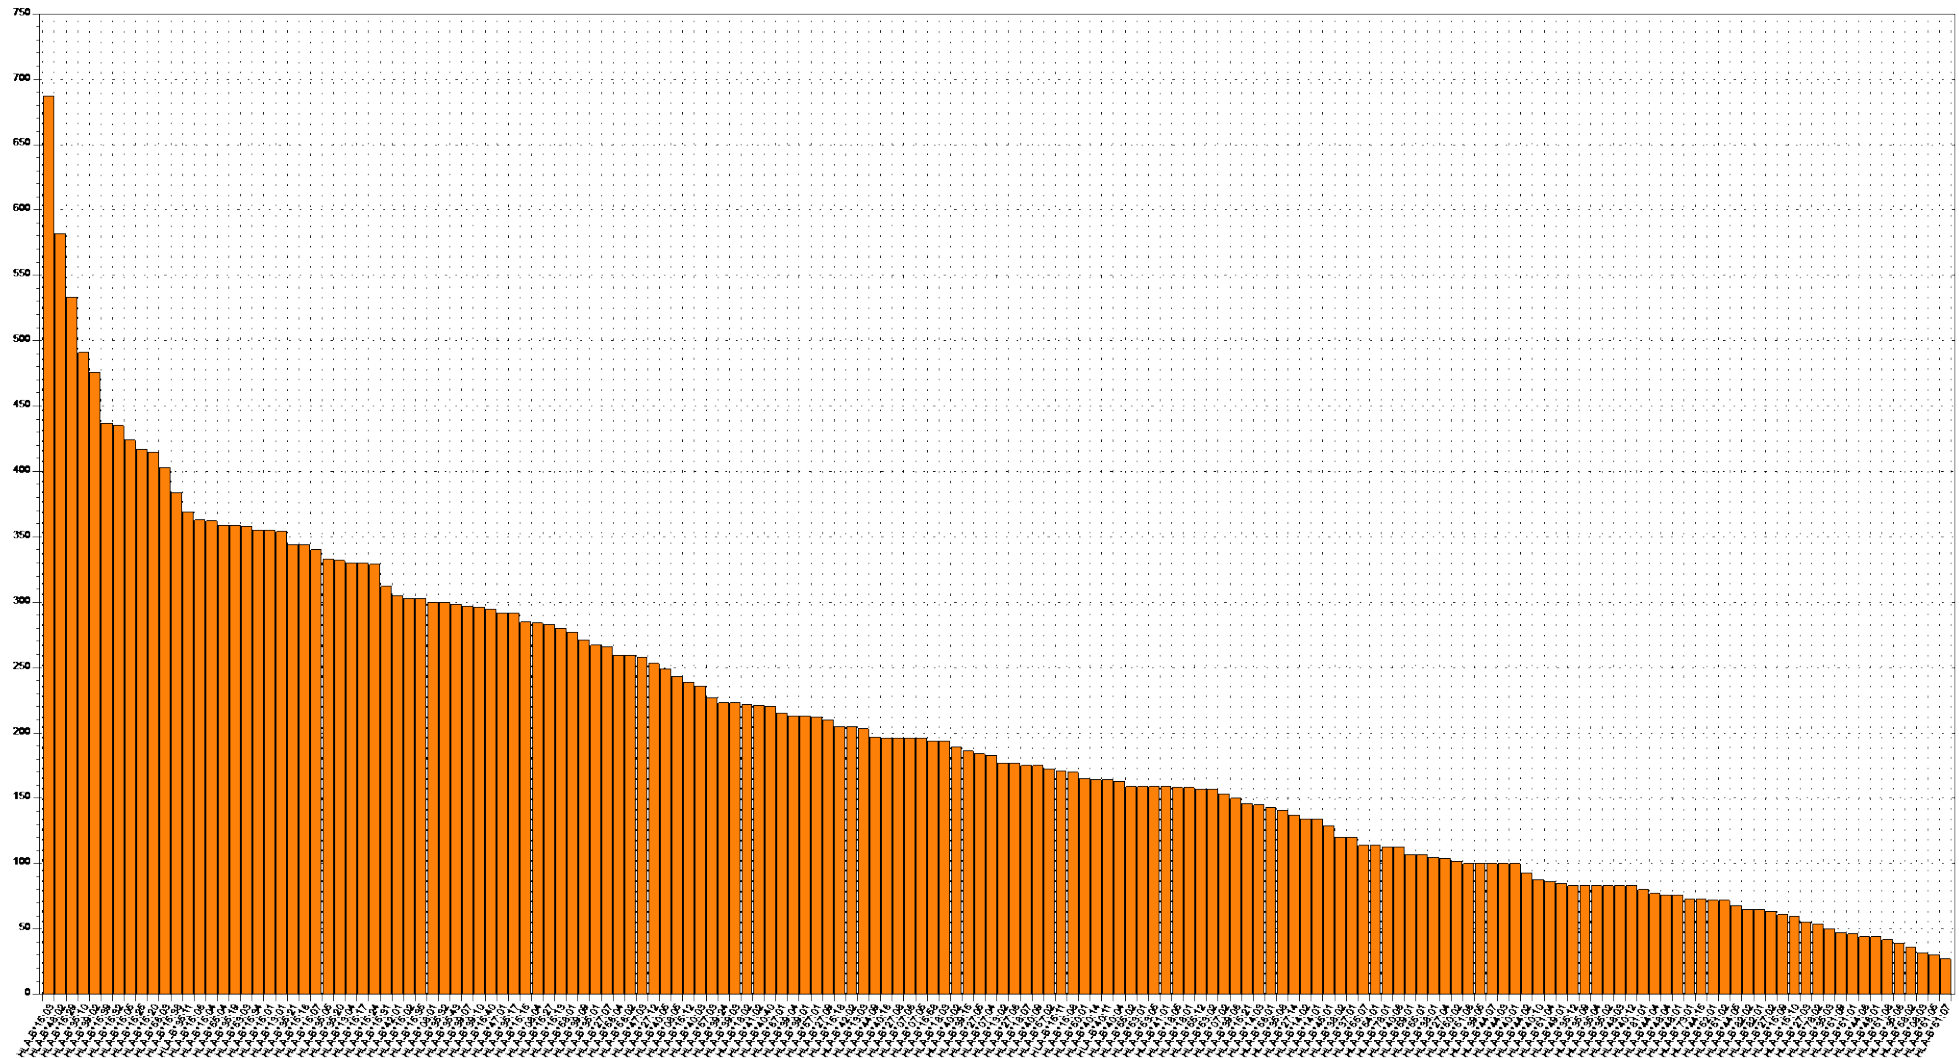

Alleles are ordered on the x-axis by their weak ( $500 \text{ nM} < IC_{50} \leq 5000 \text{ nM}$ ) binding prediction and the number of peptides presented are displayed on the y-axis.

## Total number of peptides with strong, regular and weak binding predictions for *HLA-C*

|             | <b>IC<sub>50</sub> ≤ 50 nM</b><br>Strong binders | <b>50 nM &lt; IC<sub>50</sub> ≤ 500 nM</b><br>Regular binders | <b>500 nM &lt; IC<sub>50</sub> ≤ 5000 nM</b><br>Weak binders | <b>IC<sub>50</sub> &gt; 5000 nM</b><br>Non binders |
|-------------|--------------------------------------------------|---------------------------------------------------------------|--------------------------------------------------------------|----------------------------------------------------|
| HLA-C*01:02 | 0                                                | 4                                                             | 107                                                          | 4360                                               |
| HLA-C*01:03 | 0                                                | 0                                                             | 11                                                           | 4460                                               |
| HLA-C*02:02 | 1                                                | 71                                                            | 457                                                          | 3942                                               |
| HLA-C*02:10 | 1                                                | 71                                                            | 457                                                          | 3942                                               |
| HLA-C*03:02 | 48                                               | 190                                                           | 527                                                          | 3706                                               |
| HLA-C*03:03 | 30                                               | 122                                                           | 361                                                          | 3958                                               |
| HLA-C*03:04 | 30                                               | 122                                                           | 361                                                          | 3958                                               |
| HLA-C*03:05 | 11                                               | 107                                                           | 359                                                          | 3994                                               |
| HLA-C*03:07 | 14                                               | 137                                                           | 376                                                          | 3944                                               |
| HLA-C*04:01 | 0                                                | 2                                                             | 29                                                           | 4440                                               |
| HLA-C*04:03 | 1                                                | 5                                                             | 56                                                           | 4409                                               |
| HLA-C*04:04 | 0                                                | 0                                                             | 52                                                           | 4419                                               |
| HLA-C*04:05 | 0                                                | 2                                                             | 29                                                           | 4440                                               |
| HLA-C*04:06 | 0                                                | 5                                                             | 130                                                          | 4336                                               |
| HLA-C*04:07 | 0                                                | 2                                                             | 29                                                           | 4440                                               |
| HLA-C*05:01 | 5                                                | 16                                                            | 145                                                          | 4305                                               |
| HLA-C*06:02 | 6                                                | 40                                                            | 189                                                          | 4236                                               |
| HLA-C*06:04 | 8                                                | 66                                                            | 364                                                          | 4033                                               |
| HLA-C*06:06 | 0                                                | 67                                                            | 435                                                          | 3969                                               |
| HLA-C*07:01 | 6                                                | 41                                                            | 214                                                          | 4210                                               |
| HLA-C*07:02 | 6                                                | 65                                                            | 317                                                          | 4083                                               |
| HLA-C*07:03 | 2                                                | 60                                                            | 406                                                          | 4003                                               |
| HLA-C*07:04 | 0                                                | 0                                                             | 70                                                           | 4401                                               |
| HLA-C*07:05 | 12                                               | 56                                                            | 321                                                          | 4082                                               |
| HLA-C*07:06 | 6                                                | 41                                                            | 214                                                          | 4210                                               |
| HLA-C*07:07 | 0                                                | 17                                                            | 140                                                          | 4314                                               |
| HLA-C*07:08 | 1                                                | 19                                                            | 144                                                          | 4307                                               |
| HLA-C*07:10 | 6                                                | 61                                                            | 329                                                          | 4075                                               |
| HLA-C*07:11 | 0                                                | 0                                                             | 70                                                           | 4401                                               |
| HLA-C*07:18 | 6                                                | 41                                                            | 214                                                          | 4210                                               |
| HLA-C*08:01 | 2                                                | 23                                                            | 212                                                          | 4234                                               |
| HLA-C*08:02 | 2                                                | 7                                                             | 86                                                           | 4376                                               |
| HLA-C*08:03 | 2                                                | 23                                                            | 212                                                          | 4234                                               |
| HLA-C*08:04 | 1                                                | 27                                                            | 231                                                          | 4212                                               |
| HLA-C*12:02 | 7                                                | 123                                                           | 505                                                          | 3836                                               |
| HLA-C*12:03 | 42                                               | 237                                                           | 634                                                          | 3558                                               |
| HLA-C*12:04 | 8                                                | 165                                                           | 581                                                          | 3717                                               |
| HLA-C*12:05 | 8                                                | 158                                                           | 546                                                          | 3759                                               |
| HLA-C*14:02 | 29                                               | 185                                                           | 643                                                          | 3614                                               |
| HLA-C*14:03 | 29                                               | 185                                                           | 643                                                          | 3614                                               |
| HLA-C*15:02 | 4                                                | 92                                                            | 370                                                          | 4005                                               |
| HLA-C*15:03 | 5                                                | 91                                                            | 376                                                          | 3999                                               |
| HLA-C*15:04 | 14                                               | 174                                                           | 521                                                          | 3762                                               |
| HLA-C*15:05 | 1                                                | 73                                                            | 278                                                          | 4119                                               |
| HLA-C*15:06 | 13                                               | 132                                                           | 409                                                          | 3917                                               |
| HLA-C*15:07 | 4                                                | 100                                                           | 383                                                          | 3984                                               |
| HLA-C*15:08 | 2                                                | 50                                                            | 271                                                          | 4148                                               |
| HLA-C*15:13 | 4                                                | 92                                                            | 370                                                          | 4005                                               |
| HLA-C*16:01 | 28                                               | 225                                                           | 546                                                          | 3672                                               |
| HLA-C*16:02 | 3                                                | 114                                                           | 463                                                          | 3891                                               |
| HLA-C*16:04 | 20                                               | 189                                                           | 561                                                          | 3701                                               |
| HLA-C*17:01 | 4                                                | 52                                                            | 446                                                          | 3969                                               |
| HLA-C*17:03 | 2                                                | 26                                                            | 223                                                          | 4220                                               |
| HLA-C*18:01 | 0                                                | 0                                                             | 11                                                           | 4460                                               |
| HLA-C*18:02 | 0                                                | 0                                                             | 11                                                           | 4460                                               |

Alleles are ordered alphabetically.

## General binding prediction tendencies for HLA-C

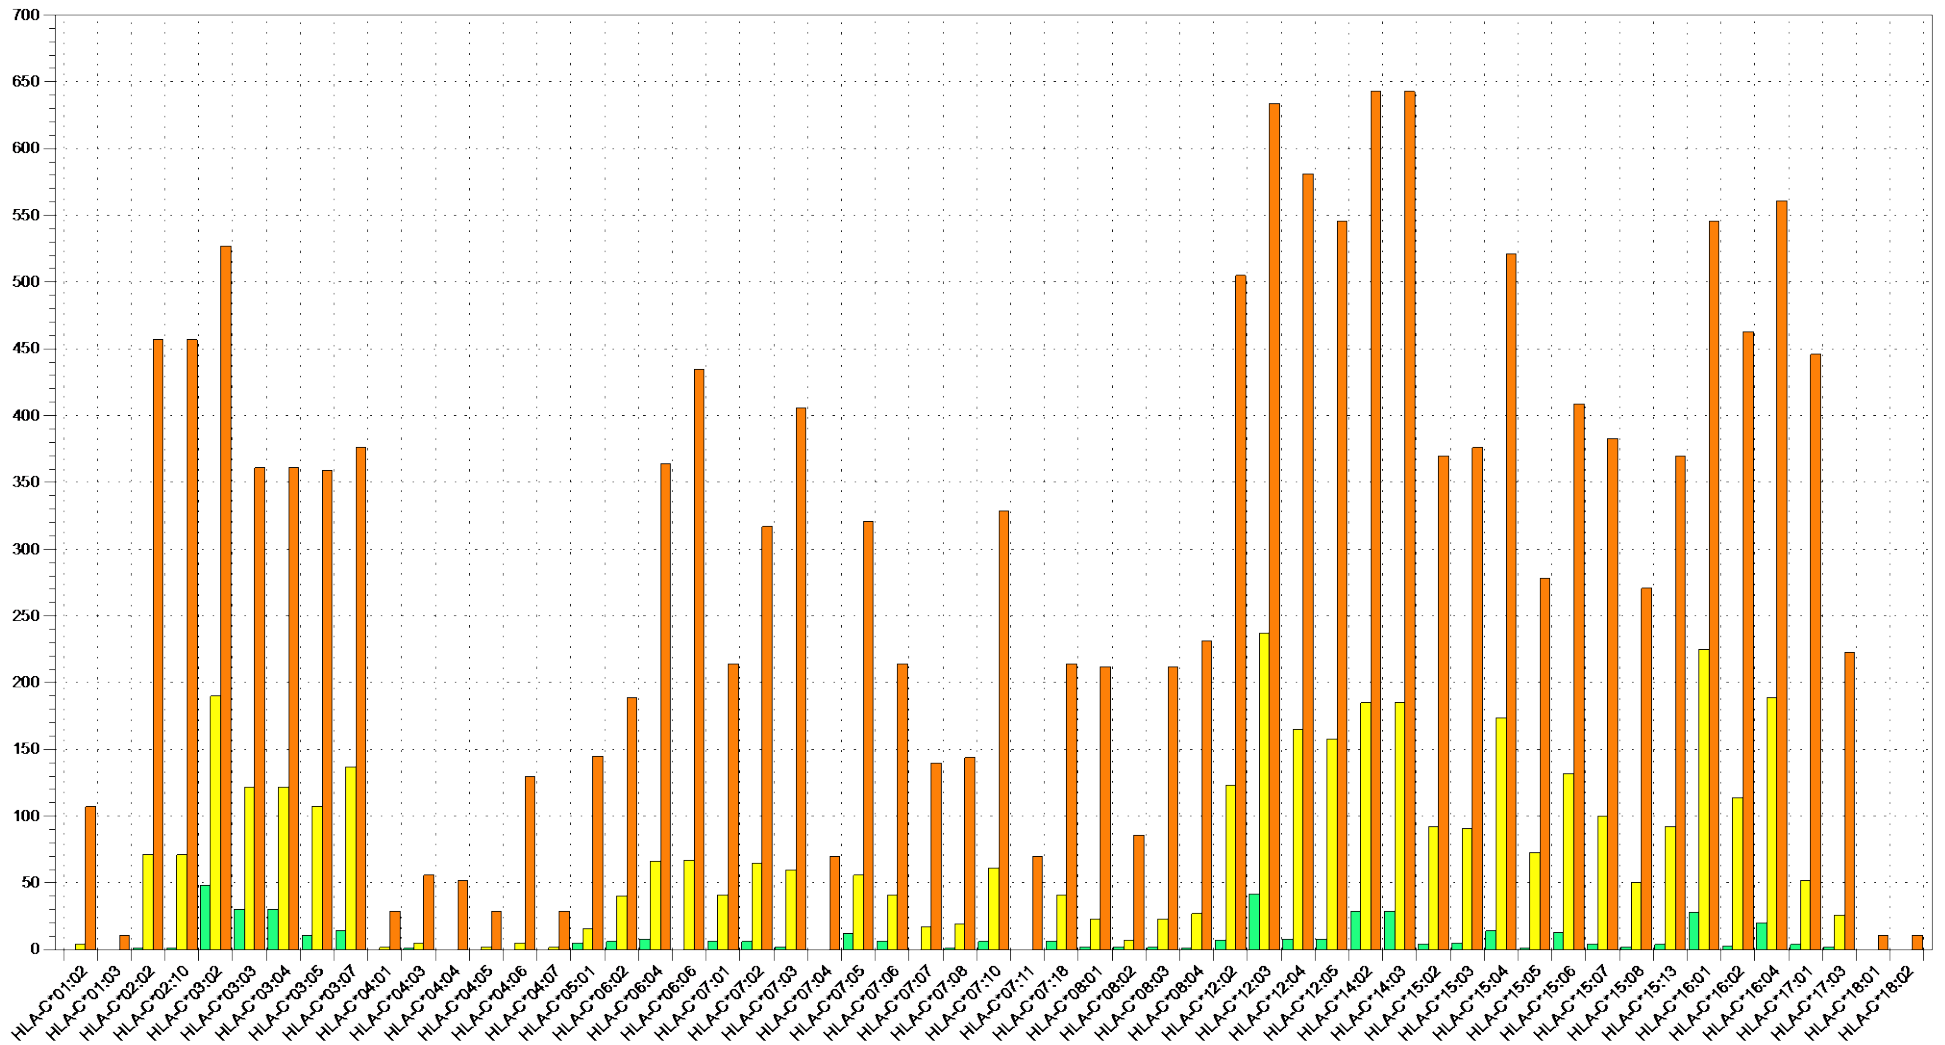

Alleles are ordered alphabetically on the x-axis, while the number of peptides binding with strong ( $IC_{50} \leq 50$  nM), regular ( $50 \text{ nM} < IC_{50} \leq 500$  nM) and weak ( $500 \text{ nM} < IC_{50} \leq 5000$  nM) binding prediction are displayed on the y-axis.



## HLA-C alleles ordered by number of presented peptides with strong binding prediction

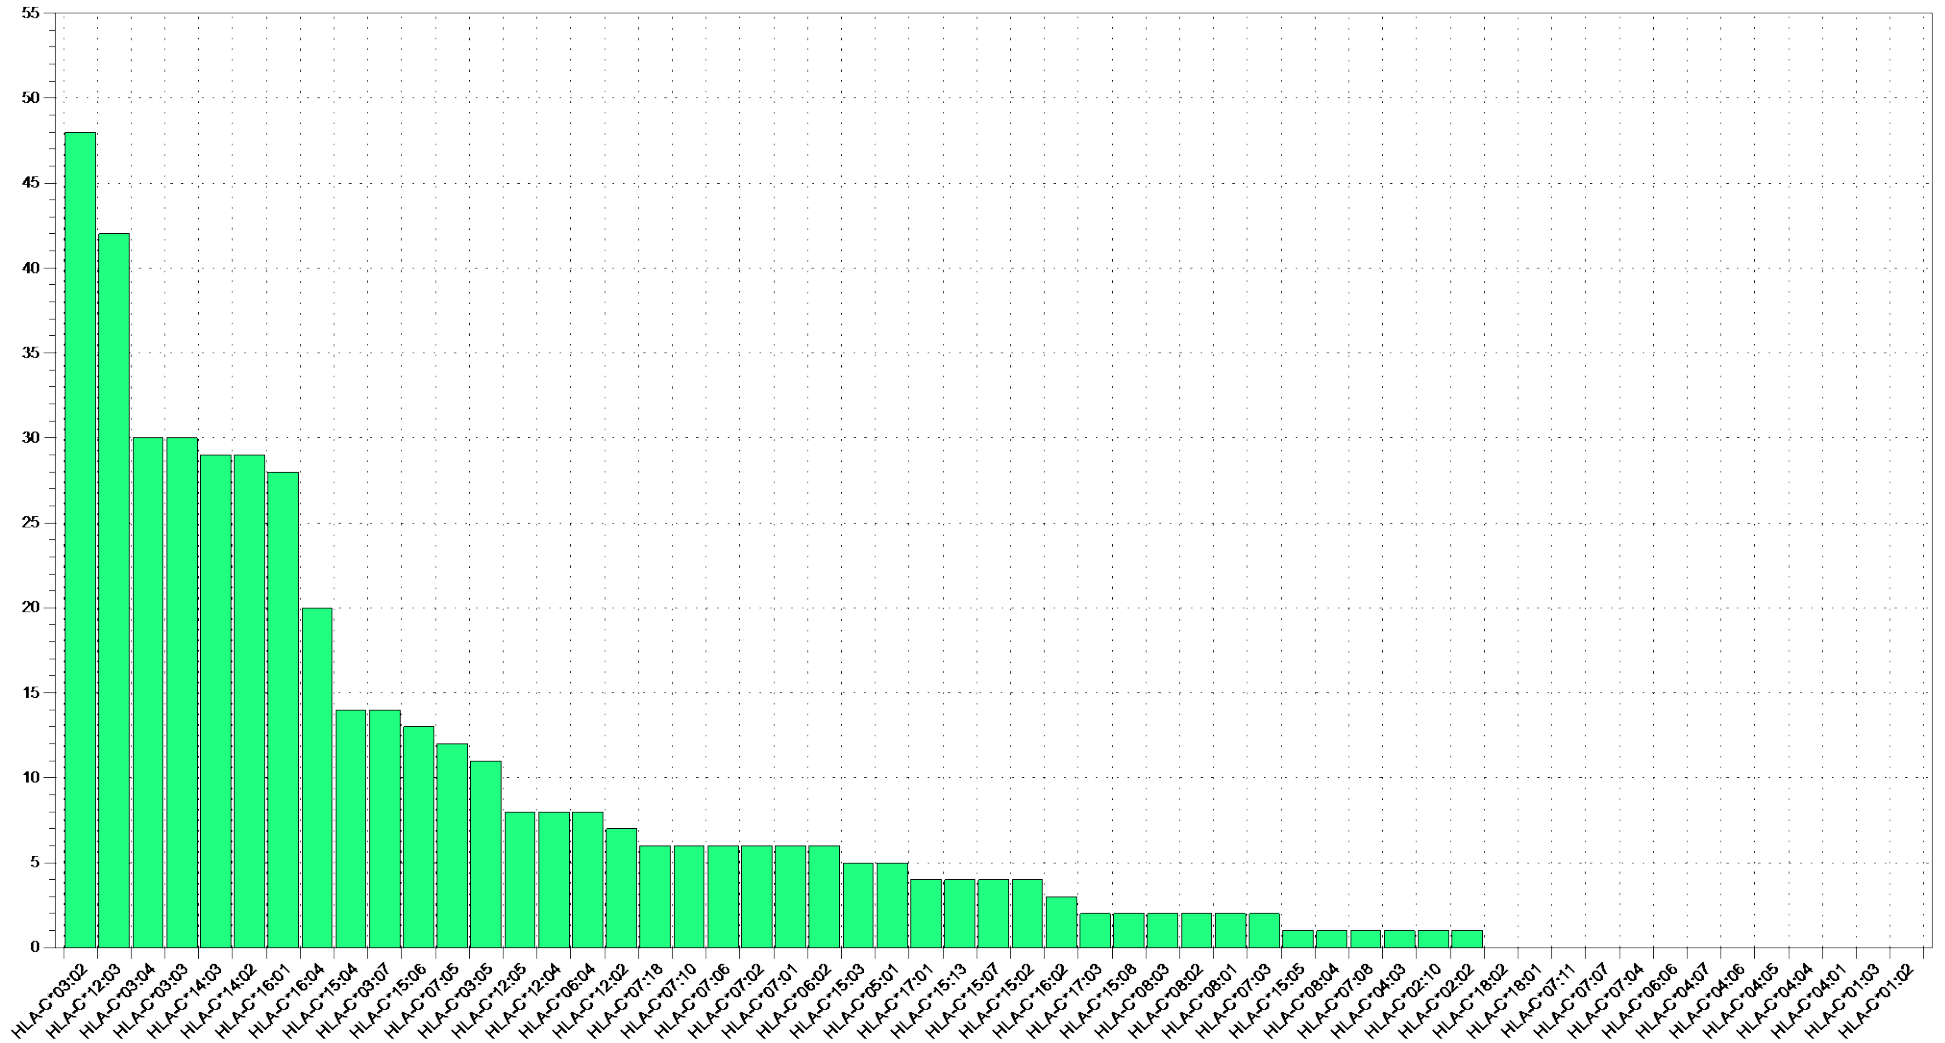

Alleles are ordered on the x-axis by their strong (IC<sub>50</sub> ≤ 50 nM) binding prediction and the number of peptides presented are displayed on the y-axis.

## HLA-C alleles ordered by number of presented peptides with regular binding prediction

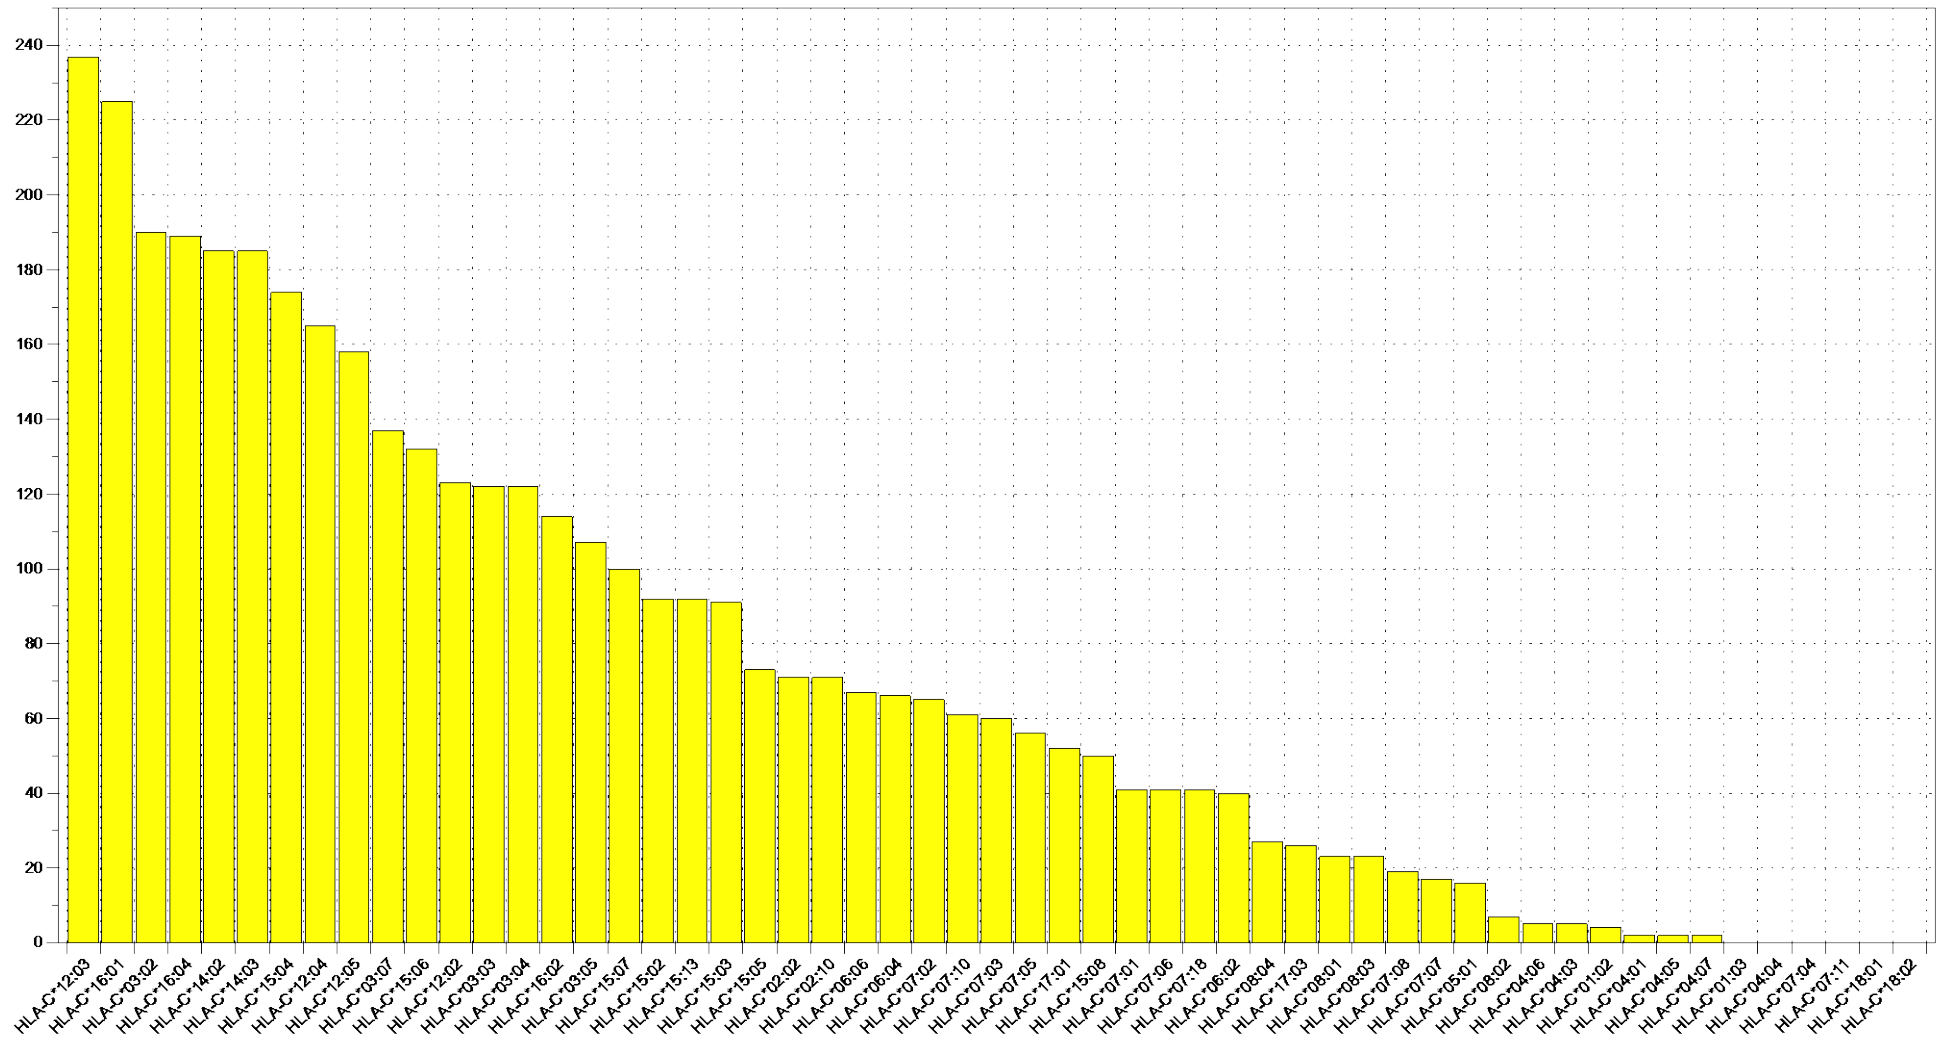

Alleles are ordered on the x-axis by their regular ( $50 \text{ nM} < \text{IC}_{50} \leq 500 \text{ nM}$ ) binding prediction and the number of peptides presented are displayed on the y-axis.

## HLA-C alleles ordered by number of presented peptides with weak binding prediction

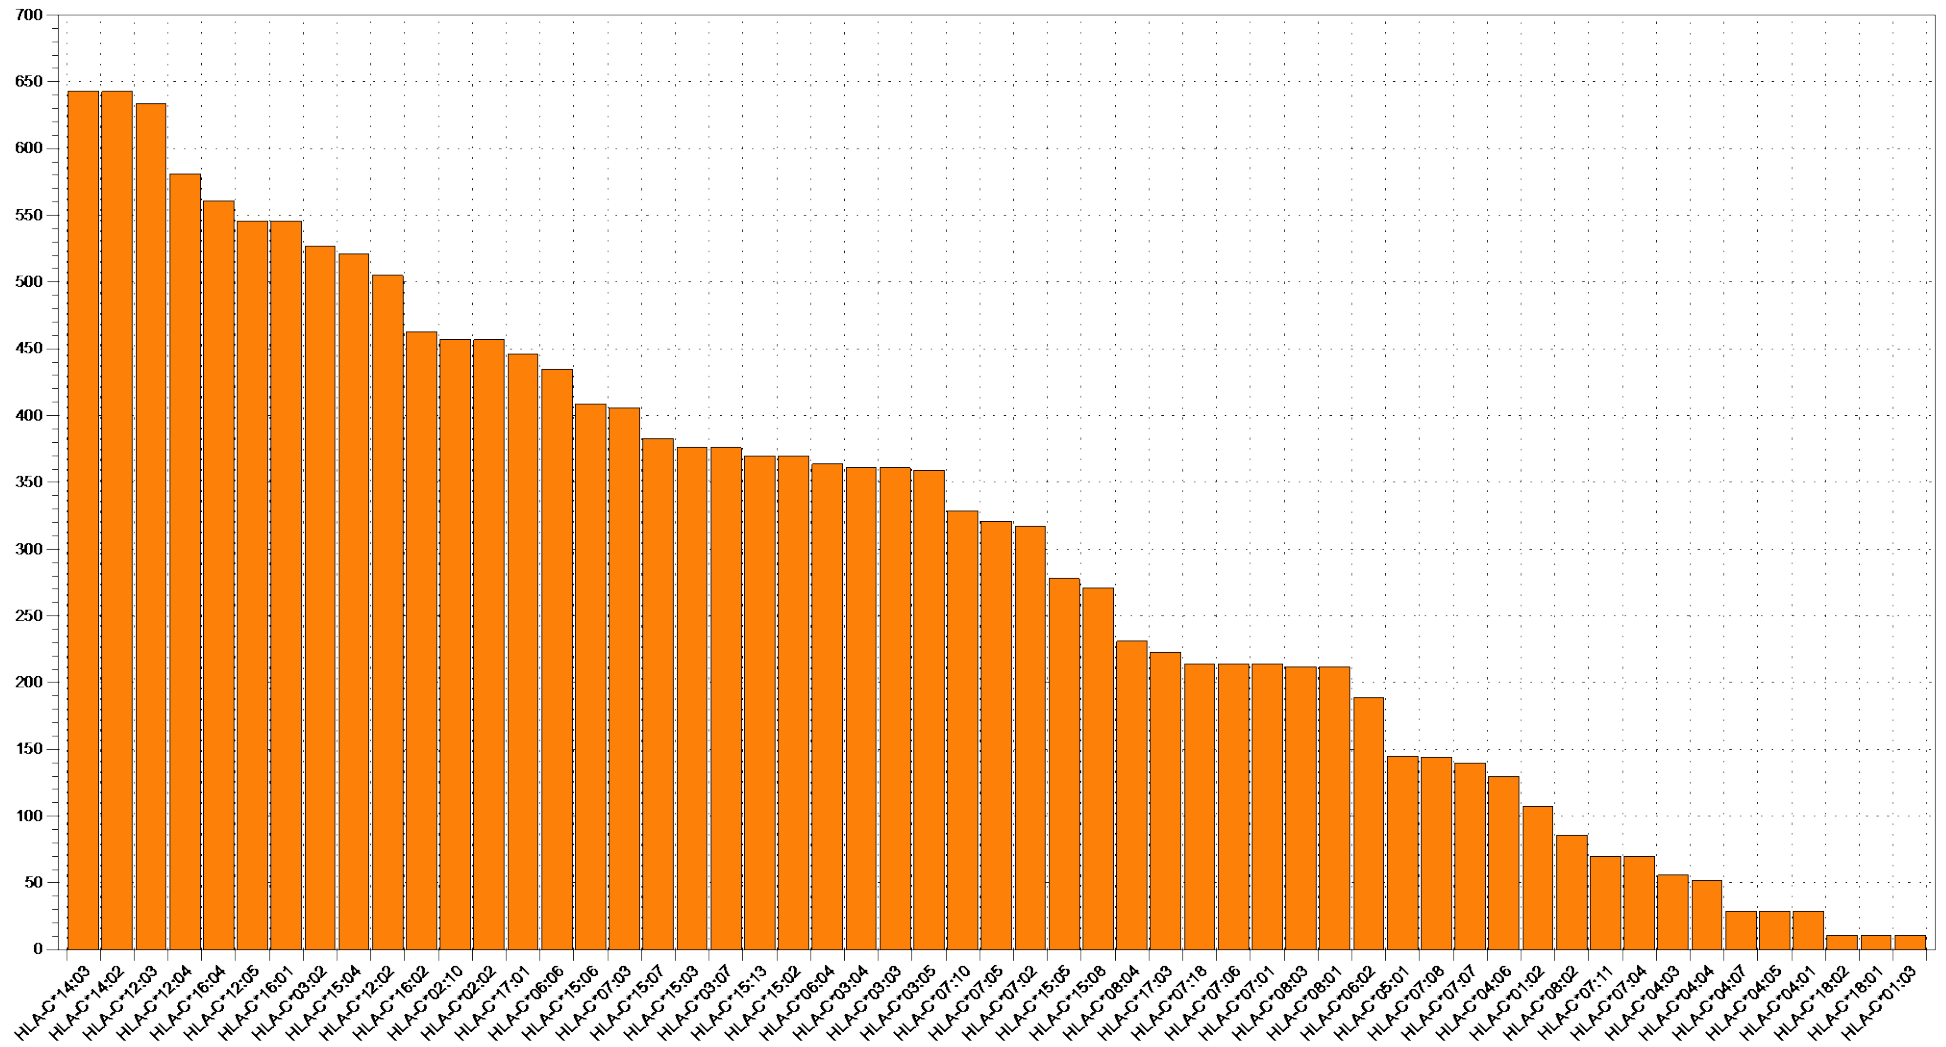

Alleles are ordered on the x-axis by their weak (500 nM < IC<sub>50</sub> ≤ 5000 nM) binding prediction and the number of peptides presented are displayed on the y-axis.

## Total number of peptides with strong, regular and weak binding predictions for *HLA-DRB1*

|                | IC <sub>50</sub> ≤ 50 nM<br>Strong binders | 50 nM < IC <sub>50</sub> ≤ 1000 nM<br>Regular binders | 1000 nM < IC <sub>50</sub> ≤ 5000 nM<br>Weak binders | IC <sub>50</sub> > 5000 nM<br>Non binders |
|----------------|--------------------------------------------|-------------------------------------------------------|------------------------------------------------------|-------------------------------------------|
| HLA-DRB1*01:01 | 381                                        | 2200                                                  | 1184                                                 | 665                                       |
| HLA-DRB1*01:02 | 10                                         | 1130                                                  | 1795                                                 | 1495                                      |
| HLA-DRB1*01:03 | 0                                          | 293                                                   | 1351                                                 | 2786                                      |
| HLA-DRB1*01:04 | 133                                        | 2068                                                  | 1410                                                 | 819                                       |
| HLA-DRB1*03:01 | 1                                          | 529                                                   | 1747                                                 | 2153                                      |
| HLA-DRB1*03:02 | 0                                          | 0                                                     | 75                                                   | 4355                                      |
| HLA-DRB1*03:03 | 0                                          | 31                                                    | 550                                                  | 3849                                      |
| HLA-DRB1*03:04 | 1                                          | 529                                                   | 1747                                                 | 2153                                      |
| HLA-DRB1*03:05 | 0                                          | 134                                                   | 1220                                                 | 3076                                      |
| HLA-DRB1*03:06 | 0                                          | 344                                                   | 1668                                                 | 2418                                      |
| HLA-DRB1*03:07 | 0                                          | 247                                                   | 1317                                                 | 2866                                      |
| HLA-DRB1*03:08 | 1                                          | 529                                                   | 1747                                                 | 2153                                      |
| HLA-DRB1*04:01 | 16                                         | 1222                                                  | 1945                                                 | 1247                                      |
| HLA-DRB1*04:02 | 0                                          | 776                                                   | 1716                                                 | 1938                                      |
| HLA-DRB1*04:03 | 0                                          | 563                                                   | 1767                                                 | 2100                                      |
| HLA-DRB1*04:04 | 24                                         | 1409                                                  | 1632                                                 | 1365                                      |
| HLA-DRB1*04:05 | 9                                          | 1120                                                  | 1826                                                 | 1475                                      |
| HLA-DRB1*04:06 | 0                                          | 563                                                   | 1767                                                 | 2100                                      |
| HLA-DRB1*04:07 | 0                                          | 241                                                   | 1520                                                 | 2669                                      |
| HLA-DRB1*04:08 | 11                                         | 989                                                   | 1896                                                 | 1534                                      |
| HLA-DRB1*04:10 | 6                                          | 1303                                                  | 1684                                                 | 1437                                      |
| HLA-DRB1*04:11 | 0                                          | 653                                                   | 1795                                                 | 1982                                      |
| HLA-DRB1*04:13 | 16                                         | 1702                                                  | 1708                                                 | 1004                                      |
| HLA-DRB1*04:15 | 0                                          | 280                                                   | 1120                                                 | 3030                                      |
| HLA-DRB1*04:17 | 0                                          | 318                                                   | 1747                                                 | 2365                                      |
| HLA-DRB1*07:01 | 80                                         | 1472                                                  | 1534                                                 | 1344                                      |
| HLA-DRB1*08:01 | 1                                          | 944                                                   | 1671                                                 | 1814                                      |
| HLA-DRB1*08:02 | 0                                          | 710                                                   | 1818                                                 | 1902                                      |
| HLA-DRB1*08:03 | 0                                          | 180                                                   | 1706                                                 | 2544                                      |
| HLA-DRB1*08:04 | 5                                          | 859                                                   | 1639                                                 | 1927                                      |
| HLA-DRB1*08:05 | 14                                         | 949                                                   | 1591                                                 | 1876                                      |
| HLA-DRB1*08:06 | 3                                          | 738                                                   | 1648                                                 | 2041                                      |
| HLA-DRB1*08:07 | 0                                          | 1279                                                  | 1827                                                 | 1324                                      |
| HLA-DRB1*08:09 | 0                                          | 710                                                   | 1818                                                 | 1902                                      |
| HLA-DRB1*08:10 | 0                                          | 697                                                   | 1780                                                 | 1953                                      |
| HLA-DRB1*08:11 | 0                                          | 1339                                                  | 1757                                                 | 1334                                      |
| HLA-DRB1*08:12 | 0                                          | 214                                                   | 1634                                                 | 2582                                      |
| HLA-DRB1*09:01 | 16                                         | 1468                                                  | 1768                                                 | 1178                                      |
| HLA-DRB1*10:01 | 164                                        | 2159                                                  | 1337                                                 | 770                                       |
| HLA-DRB1*11:01 | 69                                         | 1123                                                  | 1411                                                 | 1827                                      |
| HLA-DRB1*11:02 | 183                                        | 1797                                                  | 1317                                                 | 1133                                      |
| HLA-DRB1*11:03 | 90                                         | 1315                                                  | 1631                                                 | 1394                                      |
| HLA-DRB1*11:04 | 54                                         | 947                                                   | 1547                                                 | 1882                                      |
| HLA-DRB1*11:05 | 23                                         | 1192                                                  | 1595                                                 | 1620                                      |
| HLA-DRB1*11:06 | 13                                         | 588                                                   | 1366                                                 | 2463                                      |
| HLA-DRB1*11:08 | 14                                         | 1663                                                  | 1667                                                 | 1086                                      |
| HLA-DRB1*11:09 | 69                                         | 1123                                                  | 1411                                                 | 1827                                      |
| HLA-DRB1*11:10 | 69                                         | 1123                                                  | 1411                                                 | 1827                                      |
| HLA-DRB1*11:11 | 65                                         | 1339                                                  | 1541                                                 | 1485                                      |
| HLA-DRB1*11:12 | 69                                         | 1123                                                  | 1411                                                 | 1827                                      |
| HLA-DRB1*11:14 | 58                                         | 1239                                                  | 1678                                                 | 1455                                      |
| HLA-DRB1*11:15 | 69                                         | 1123                                                  | 1411                                                 | 1827                                      |
| HLA-DRB1*11:19 | 0                                          | 862                                                   | 1850                                                 | 1718                                      |
| HLA-DRB1*11:28 | 69                                         | 1123                                                  | 1411                                                 | 1827                                      |
| HLA-DRB1*12:01 | 0                                          | 512                                                   | 1520                                                 | 2398                                      |
| HLA-DRB1*12:02 | 0                                          | 278                                                   | 1213                                                 | 2939                                      |
| HLA-DRB1*12:03 | 0                                          | 918                                                   | 1649                                                 | 1863                                      |
| HLA-DRB1*13:01 | 183                                        | 1797                                                  | 1317                                                 | 1133                                      |
| HLA-DRB1*13:02 | 58                                         | 1239                                                  | 1678                                                 | 1455                                      |
| HLA-DRB1*13:03 | 0                                          | 780                                                   | 2019                                                 | 1631                                      |
| HLA-DRB1*13:04 | 106                                        | 1616                                                  | 1490                                                 | 1218                                      |
| HLA-DRB1*13:05 | 69                                         | 1123                                                  | 1411                                                 | 1827                                      |

|                | <b>IC<sub>50</sub> ≤ 50 nM</b><br><b>Strong binders</b> | <b>50 nM &lt; IC<sub>50</sub> ≤ 1000 nM</b><br><b>Regular binders</b> | <b>1000 nM &lt; IC<sub>50</sub> ≤ 5000 nM</b><br><b>Weak binders</b> | <b>IC<sub>50</sub> &gt; 5000 nM</b><br><b>Non binders</b> |
|----------------|---------------------------------------------------------|-----------------------------------------------------------------------|----------------------------------------------------------------------|-----------------------------------------------------------|
| HLA-DRB1*13:06 | 43                                                      | 1326                                                                  | 1557                                                                 | 1504                                                      |
| HLA-DRB1*13:07 | 32                                                      | 922                                                                   | 1449                                                                 | 2027                                                      |
| HLA-DRB1*13:08 | 96                                                      | 1692                                                                  | 1459                                                                 | 1183                                                      |
| HLA-DRB1*13:10 | 0                                                       | 449                                                                   | 1862                                                                 | 2119                                                      |
| HLA-DRB1*13:11 | 54                                                      | 947                                                                   | 1547                                                                 | 1882                                                      |
| HLA-DRB1*13:12 | 0                                                       | 809                                                                   | 1921                                                                 | 1700                                                      |
| HLA-DRB1*13:22 | 183                                                     | 1797                                                                  | 1317                                                                 | 1133                                                      |
| HLA-DRB1*14:01 | 0                                                       | 1664                                                                  | 1879                                                                 | 887                                                       |
| HLA-DRB1*14:02 | 0                                                       | 804                                                                   | 2133                                                                 | 1493                                                      |
| HLA-DRB1*14:03 | 0                                                       | 324                                                                   | 1732                                                                 | 2374                                                      |
| HLA-DRB1*14:04 | 0                                                       | 1324                                                                  | 2118                                                                 | 988                                                       |
| HLA-DRB1*14:05 | 0                                                       | 990                                                                   | 2032                                                                 | 1408                                                      |
| HLA-DRB1*14:06 | 17                                                      | 1545                                                                  | 1796                                                                 | 1072                                                      |
| HLA-DRB1*14:07 | 0                                                       | 661                                                                   | 2397                                                                 | 1372                                                      |
| HLA-DRB1*14:08 | 0                                                       | 990                                                                   | 2032                                                                 | 1408                                                      |
| HLA-DRB1*14:09 | 4                                                       | 1449                                                                  | 2039                                                                 | 938                                                       |
| HLA-DRB1*14:10 | 0                                                       | 709                                                                   | 1926                                                                 | 1795                                                      |
| HLA-DRB1*14:12 | 1                                                       | 845                                                                   | 1830                                                                 | 1754                                                      |
| HLA-DRB1*14:13 | 0                                                       | 845                                                                   | 2182                                                                 | 1403                                                      |
| HLA-DRB1*14:14 | 0                                                       | 337                                                                   | 1996                                                                 | 2097                                                      |
| HLA-DRB1*14:18 | 0                                                       | 490                                                                   | 1976                                                                 | 1964                                                      |
| HLA-DRB1*14:54 | 0                                                       | 1664                                                                  | 1879                                                                 | 887                                                       |
| HLA-DRB1*15:01 | 15                                                      | 1092                                                                  | 1534                                                                 | 1789                                                      |
| HLA-DRB1*15:02 | 5                                                       | 625                                                                   | 1756                                                                 | 2044                                                      |
| HLA-DRB1*15:03 | 0                                                       | 437                                                                   | 1384                                                                 | 2609                                                      |
| HLA-DRB1*15:04 | 13                                                      | 808                                                                   | 1610                                                                 | 1999                                                      |
| HLA-DRB1*15:06 | 15                                                      | 1092                                                                  | 1534                                                                 | 1789                                                      |
| HLA-DRB1*15:11 | 2                                                       | 527                                                                   | 1734                                                                 | 2167                                                      |
| HLA-DRB1*16:01 | 4                                                       | 663                                                                   | 1567                                                                 | 2196                                                      |
| HLA-DRB1*16:02 | 20                                                      | 1204                                                                  | 1806                                                                 | 1400                                                      |
| HLA-DRB1*16:03 | 4                                                       | 663                                                                   | 1567                                                                 | 2196                                                      |
| HLA-DRB1*16:05 | 3                                                       | 609                                                                   | 1776                                                                 | 2042                                                      |

Alleles are ordered alphabetically.

## General binding prediction tendencies for *HLA-DRB1*

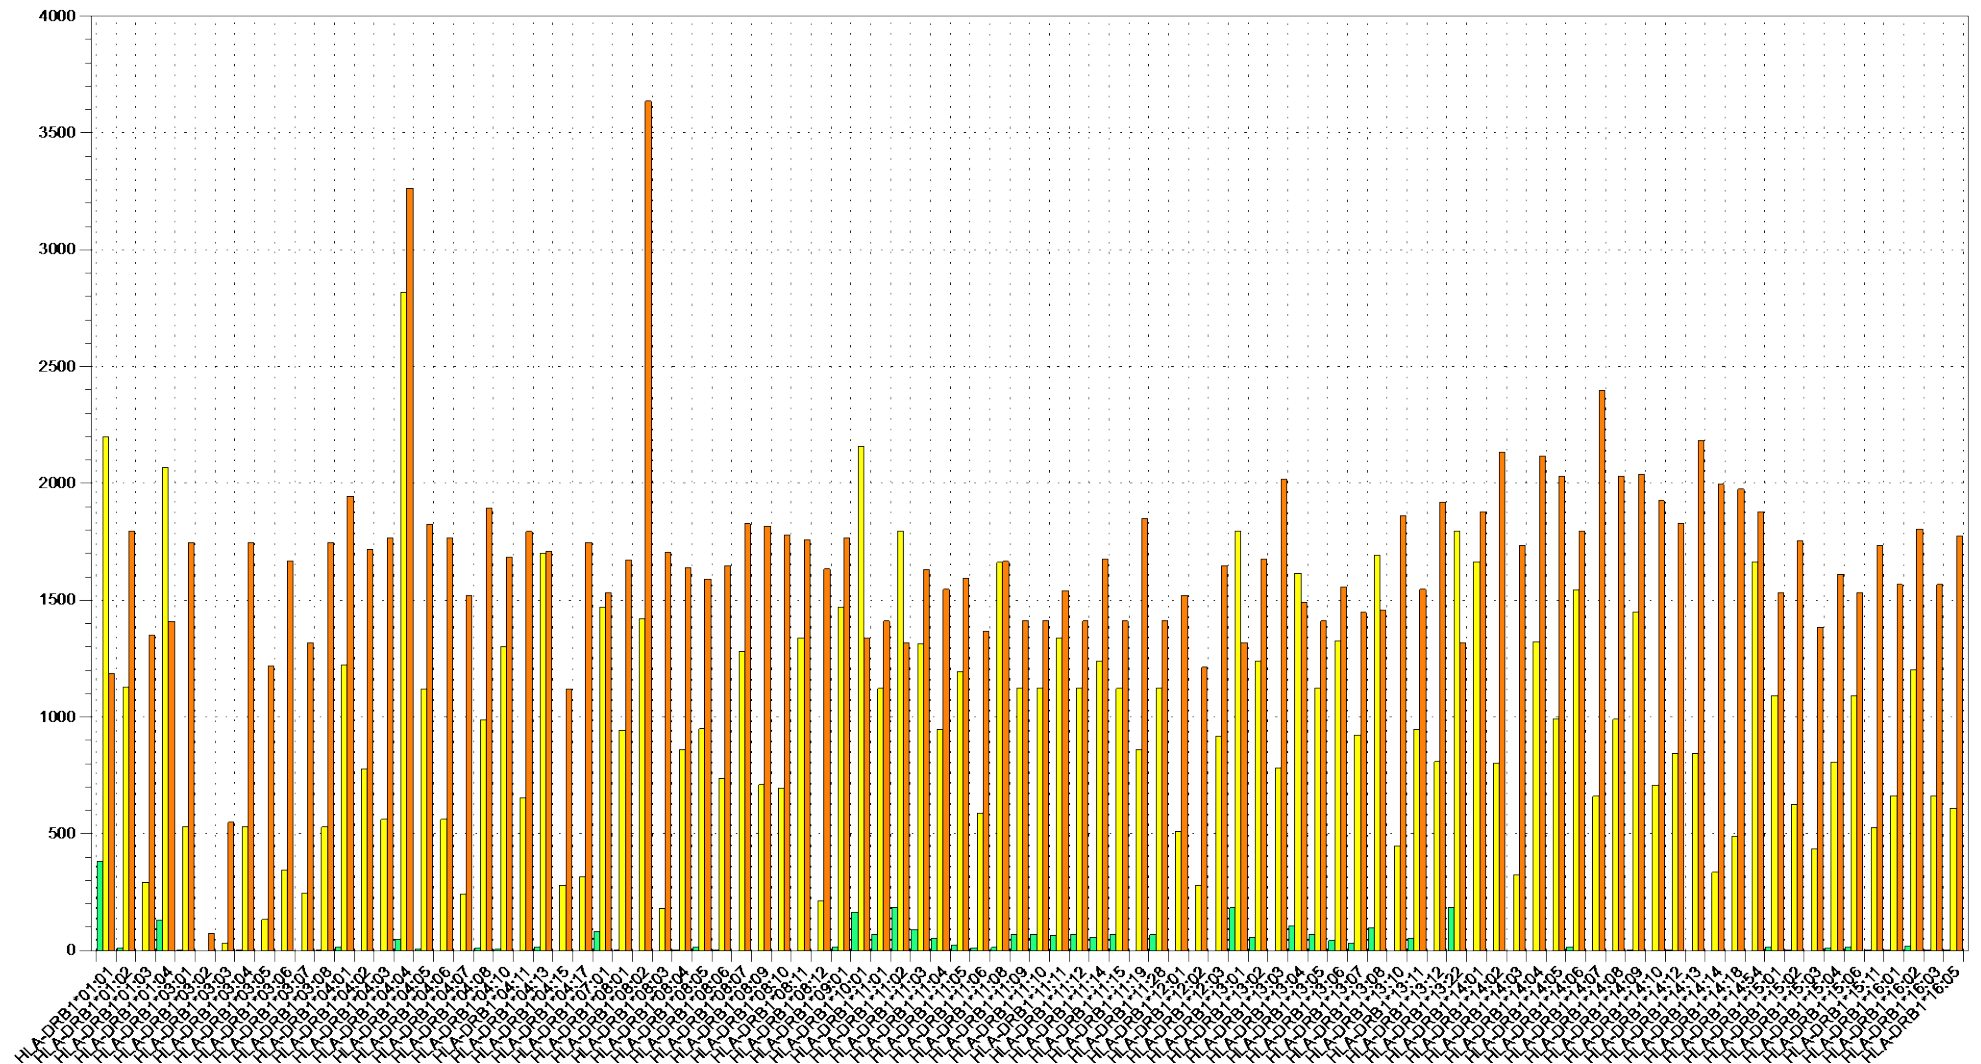

Alleles are ordered alphabetically on the x-axis, while the number of peptides binding with strong ( $IC_{50} \leq 50$  nM), regular ( $50$  nM  $< IC_{50} \leq 1000$  nM) and weak ( $1000$  nM  $< IC_{50} \leq 5000$  nM) binding prediction are displayed on the y-axis.

## HLA-DRB1 alleles ordered by number of presented peptides with strong binding prediction

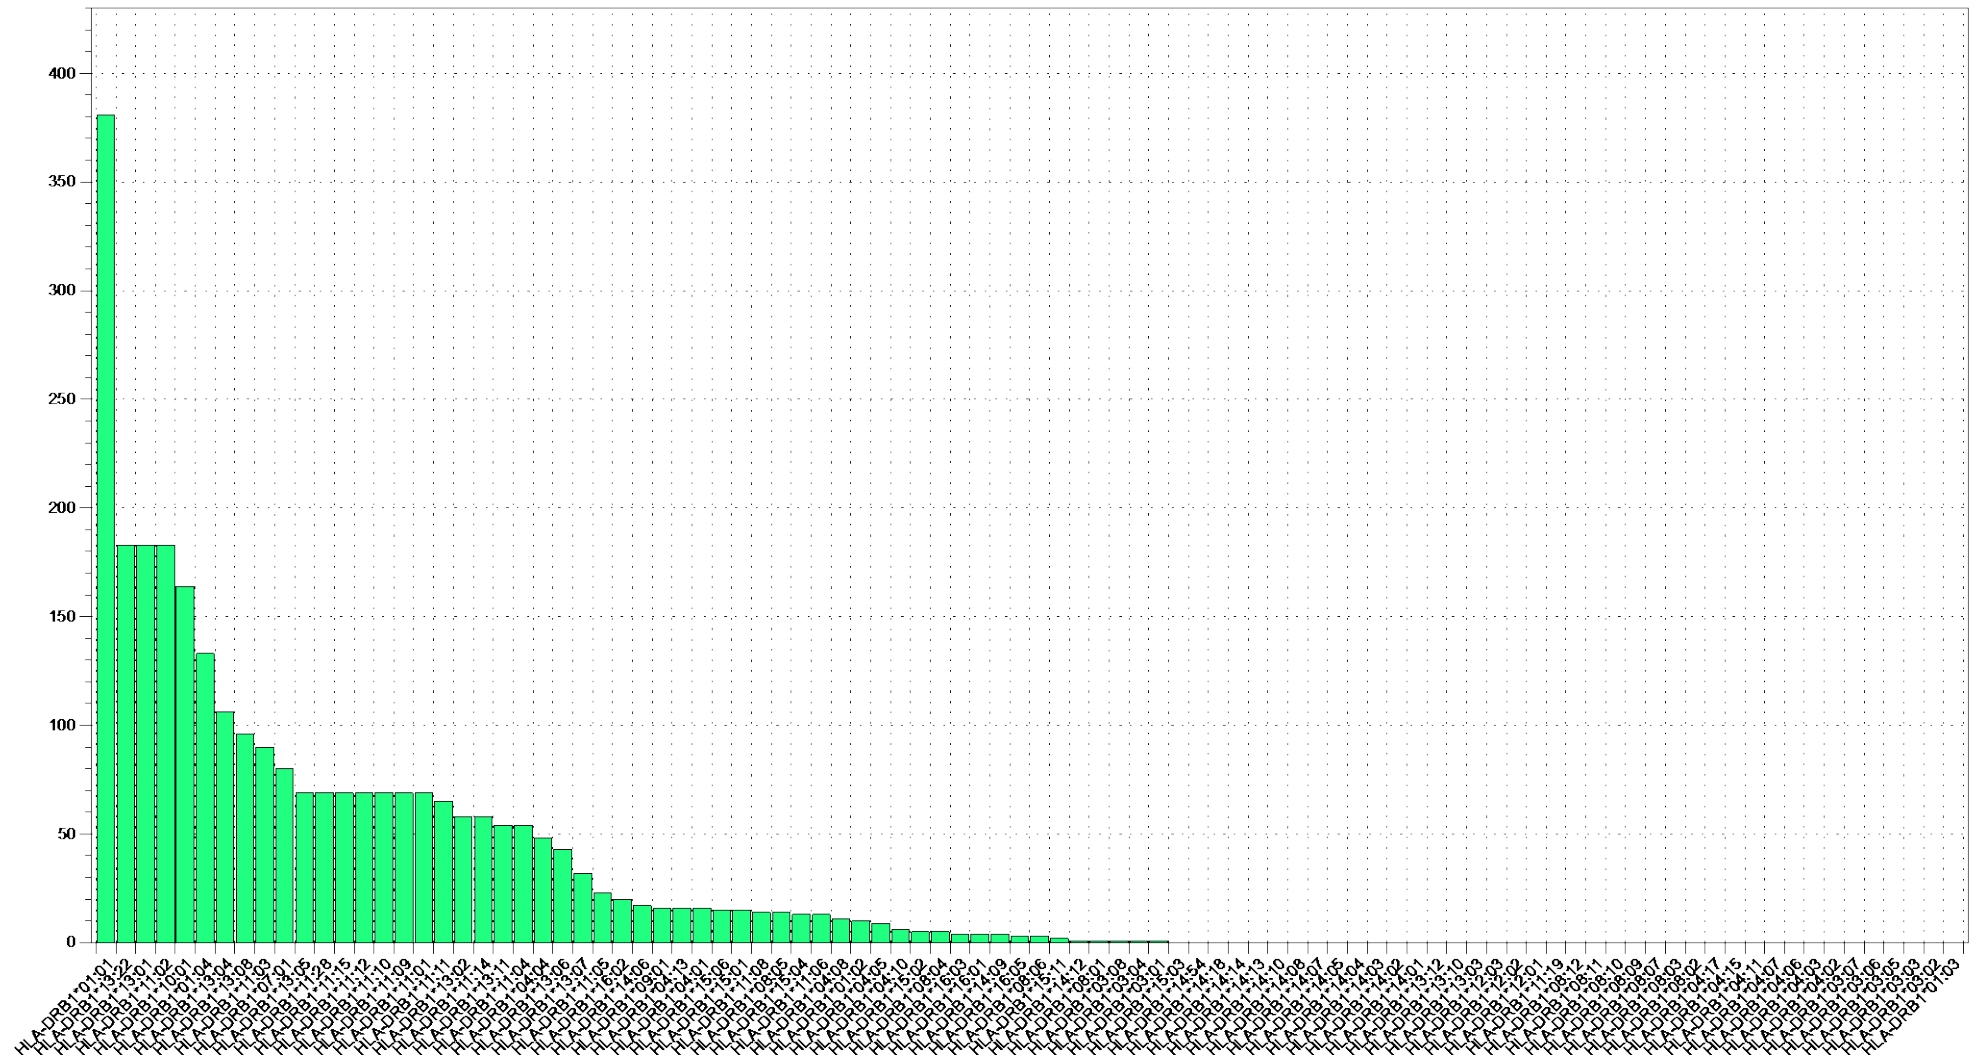

Alleles are ordered on the x-axis by their strong ( $IC_{50} \leq 50$  nM) binding prediction and the number of peptides presented are displayed on the y-axis.

## HLA-DRB1 alleles ordered by number of presented peptides with regular binding prediction

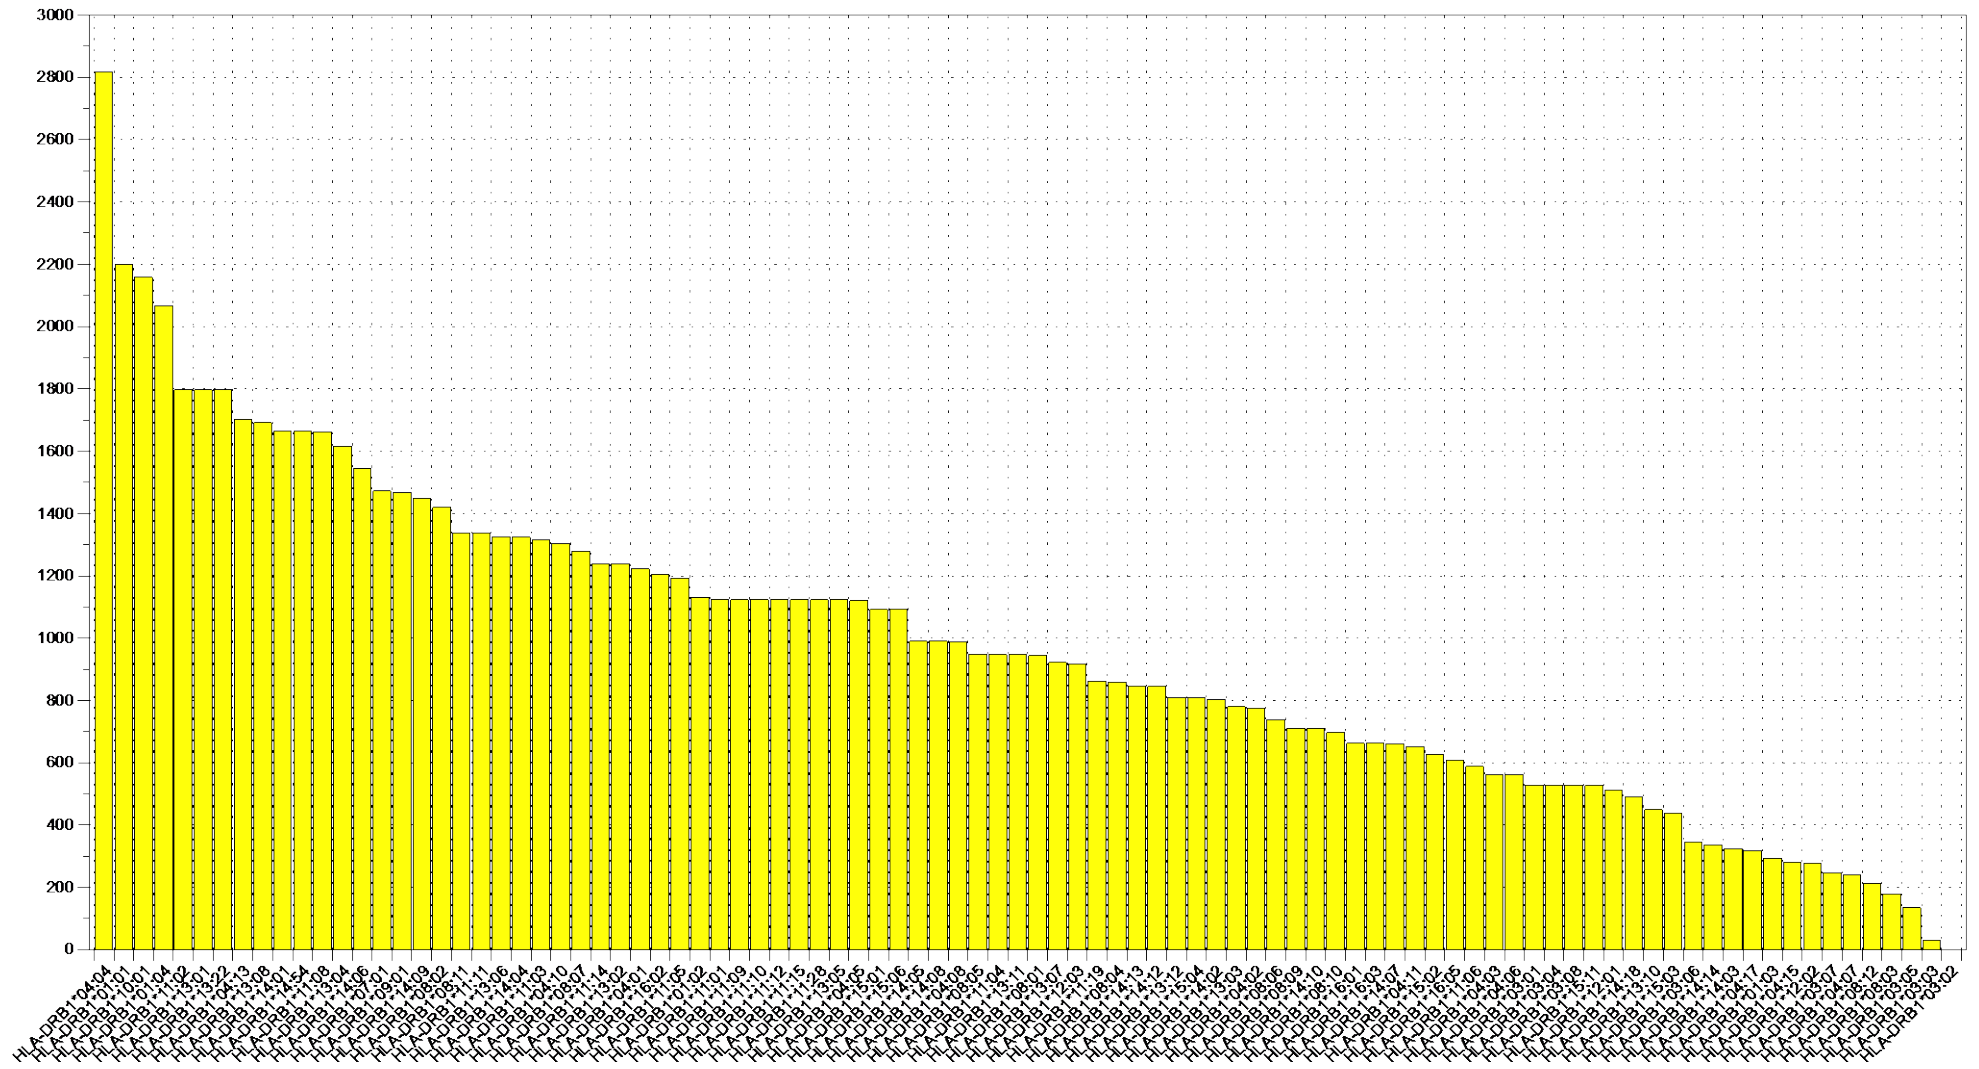

Alleles are ordered on the x-axis by their regular ( $50 \text{ nM} < IC_{50} \leq 1000 \text{ nM}$ ) binding prediction and the number of peptides presented are displayed on the y-axis.





**Total number of peptides with strong, regular and weak binding predictions for *HLA-DQA1/-DQB1***

|                           | <b>IC<sub>50</sub> ≤ 50 nM<br/>Strong binders</b> | <b>50 nM &lt; IC<sub>50</sub> ≤ 1000 nM<br/>Regular binders</b> | <b>1000 nM &lt; IC<sub>50</sub> ≤ 5000 nM<br/>Weak binders</b> | <b>IC<sub>50</sub> &gt; 5000 nM<br/>Non binders</b> |
|---------------------------|---------------------------------------------------|-----------------------------------------------------------------|----------------------------------------------------------------|-----------------------------------------------------|
| HLA-DQA1*05:01/DQB1*02:01 | 0                                                 | 439                                                             | 1725                                                           | 2266                                                |
| HLA-DQA1*02:01/DQB1*02:01 | 0                                                 | 72                                                              | 971                                                            | 3387                                                |
| HLA-DQA1*02:01/DQB1*02:02 | 0                                                 | 72                                                              | 971                                                            | 3387                                                |
| HLA-DQA1*05:01/DQB1*02:03 | 0                                                 | 381                                                             | 2212                                                           | 1837                                                |
| HLA-DQA1*05:01/DQB1*03:01 | 7                                                 | 653                                                             | 1938                                                           | 1832                                                |
| HLA-DQA1*03:01/DQB1*03:02 | 0                                                 | 65                                                              | 1542                                                           | 2823                                                |
| HLA-DQA1*02:01/DQB1*03:03 | 2                                                 | 739                                                             | 1933                                                           | 1756                                                |
| HLA-DQA1*03:01/DQB1*03:03 | 0                                                 | 137                                                             | 1702                                                           | 2591                                                |
| HLA-DQA1*03:02/DQB1*03:03 | 0                                                 | 137                                                             | 1702                                                           | 2591                                                |
| HLA-DQA1*03:01/DQB1*03:04 | 0                                                 | 284                                                             | 2340                                                           | 1806                                                |
| HLA-DQA1*03:01/DQB1*03:05 | 0                                                 | 100                                                             | 2343                                                           | 1987                                                |
| HLA-DQA1*05:01/DQB1*03:05 | 0                                                 | 834                                                             | 2617                                                           | 979                                                 |
| HLA-DQA1*03:01/DQB1*03:07 | 0                                                 | 65                                                              | 1542                                                           | 2823                                                |
| HLA-DQA1*01:03/DQB1*03:19 | 3                                                 | 801                                                             | 2229                                                           | 1397                                                |
| HLA-DQA1*01:05/DQB1*03:19 | 0                                                 | 116                                                             | 1647                                                           | 2667                                                |
| HLA-DQA1*05:05/DQB1*03:19 | 7                                                 | 653                                                             | 1938                                                           | 1832                                                |
| HLA-DQA1*03:01/DQB1*04:01 | 0                                                 | 56                                                              | 1329                                                           | 3045                                                |
| HLA-DQA1*03:03/DQB1*04:01 | 0                                                 | 56                                                              | 1329                                                           | 3045                                                |
| HLA-DQA1*04:01/DQB1*04:01 | 0                                                 | 89                                                              | 1655                                                           | 2686                                                |
| HLA-DQA1*04:01/DQB1*04:02 | 0                                                 | 89                                                              | 1655                                                           | 2686                                                |
| HLA-DQA1*01:01/DQB1*05:01 | 0                                                 | 122                                                             | 807                                                            | 3501                                                |
| HLA-DQA1*01:02/DQB1*05:02 | 0                                                 | 89                                                              | 961                                                            | 3380                                                |
| HLA-DQA1*01:01/DQB1*05:03 | 0                                                 | 7                                                               | 613                                                            | 3810                                                |
| HLA-DQA1*01:03/DQB1*06:01 | 0                                                 | 317                                                             | 2127                                                           | 1986                                                |
| HLA-DQA1*01:02/DQB1*06:02 | 0                                                 | 366                                                             | 2007                                                           | 2057                                                |
| HLA-DQA1*01:03/DQB1*06:02 | 0                                                 | 503                                                             | 2016                                                           | 1911                                                |
| HLA-DQA1*01:02/DQB1*06:03 | 0                                                 | 0                                                               | 524                                                            | 3906                                                |
| HLA-DQA1*01:03/DQB1*06:03 | 0                                                 | 19                                                              | 604                                                            | 3807                                                |
| HLA-DQA1*01:02/DQB1*06:08 | 0                                                 | 7                                                               | 898                                                            | 3525                                                |
| HLA-DQA1*01:02/DQB1*06:09 | 0                                                 | 0                                                               | 16                                                             | 4414                                                |
| HLA-DQA1*01:02/DQB1*06:10 | 0                                                 | 10                                                              | 1426                                                           | 2994                                                |
| HLA-DQA1*01:02/DQB1*06:11 | 0                                                 | 184                                                             | 1673                                                           | 2573                                                |
| HLA-DQA1*01:03/DQB1*06:11 | 0                                                 | 358                                                             | 1823                                                           | 2249                                                |
| HLA-DQA1*01:02/DQB1*06:14 | 0                                                 | 4                                                               | 766                                                            | 3660                                                |

Allele combinations are ordered alphabetically.

## General binding prediction tendencies for *HLA-DQA1/DQB1*

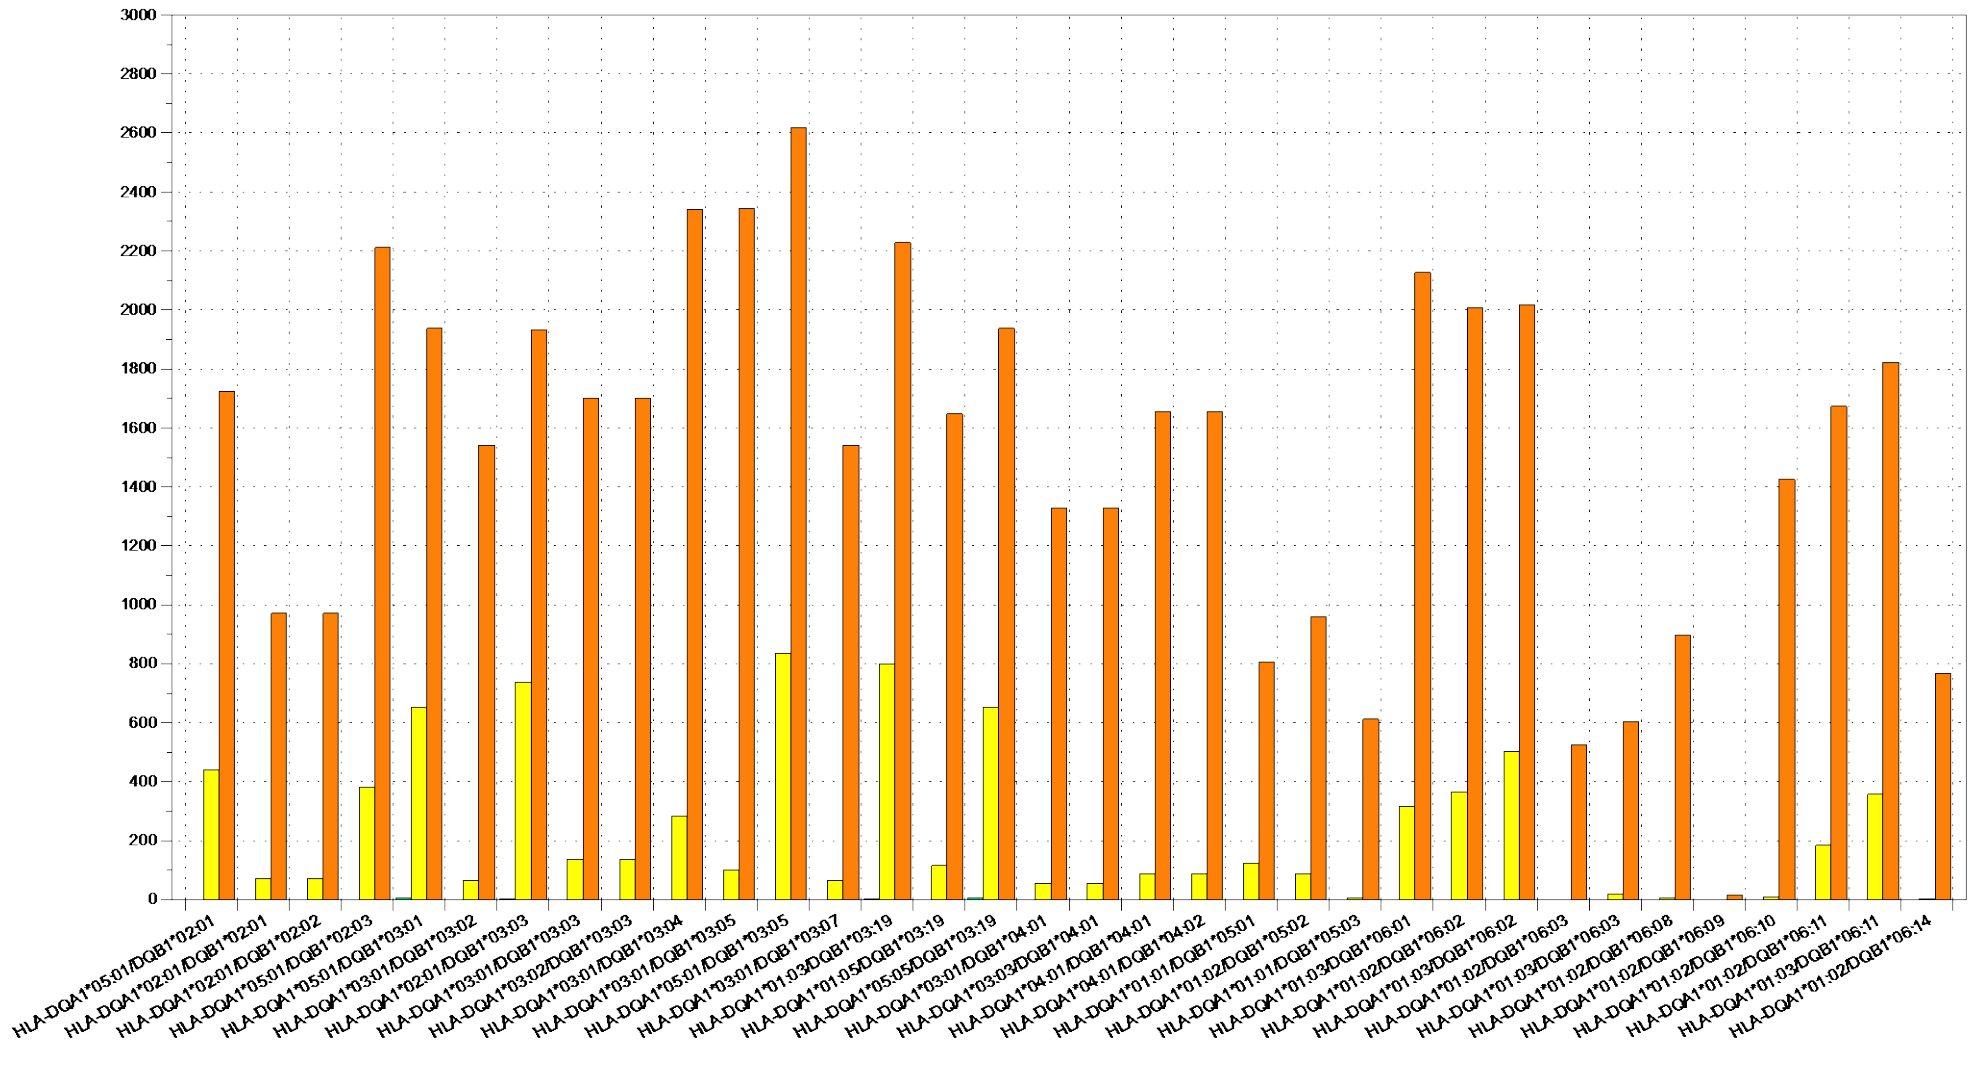

Allele combinations are ordered alphabetically on the x-axis, while the number of peptides binding with strong ( $IC_{50} \leq 50$  nM), regular ( $50$  nM  $< IC_{50} \leq 1000$  nM) and weak ( $1000$  nM  $< IC_{50} \leq 5000$  nM) binding prediction are displayed on the y-axis.

## HLA-DQA1/-DQB1 alleles ordered by number of presented peptides with strong binding prediction

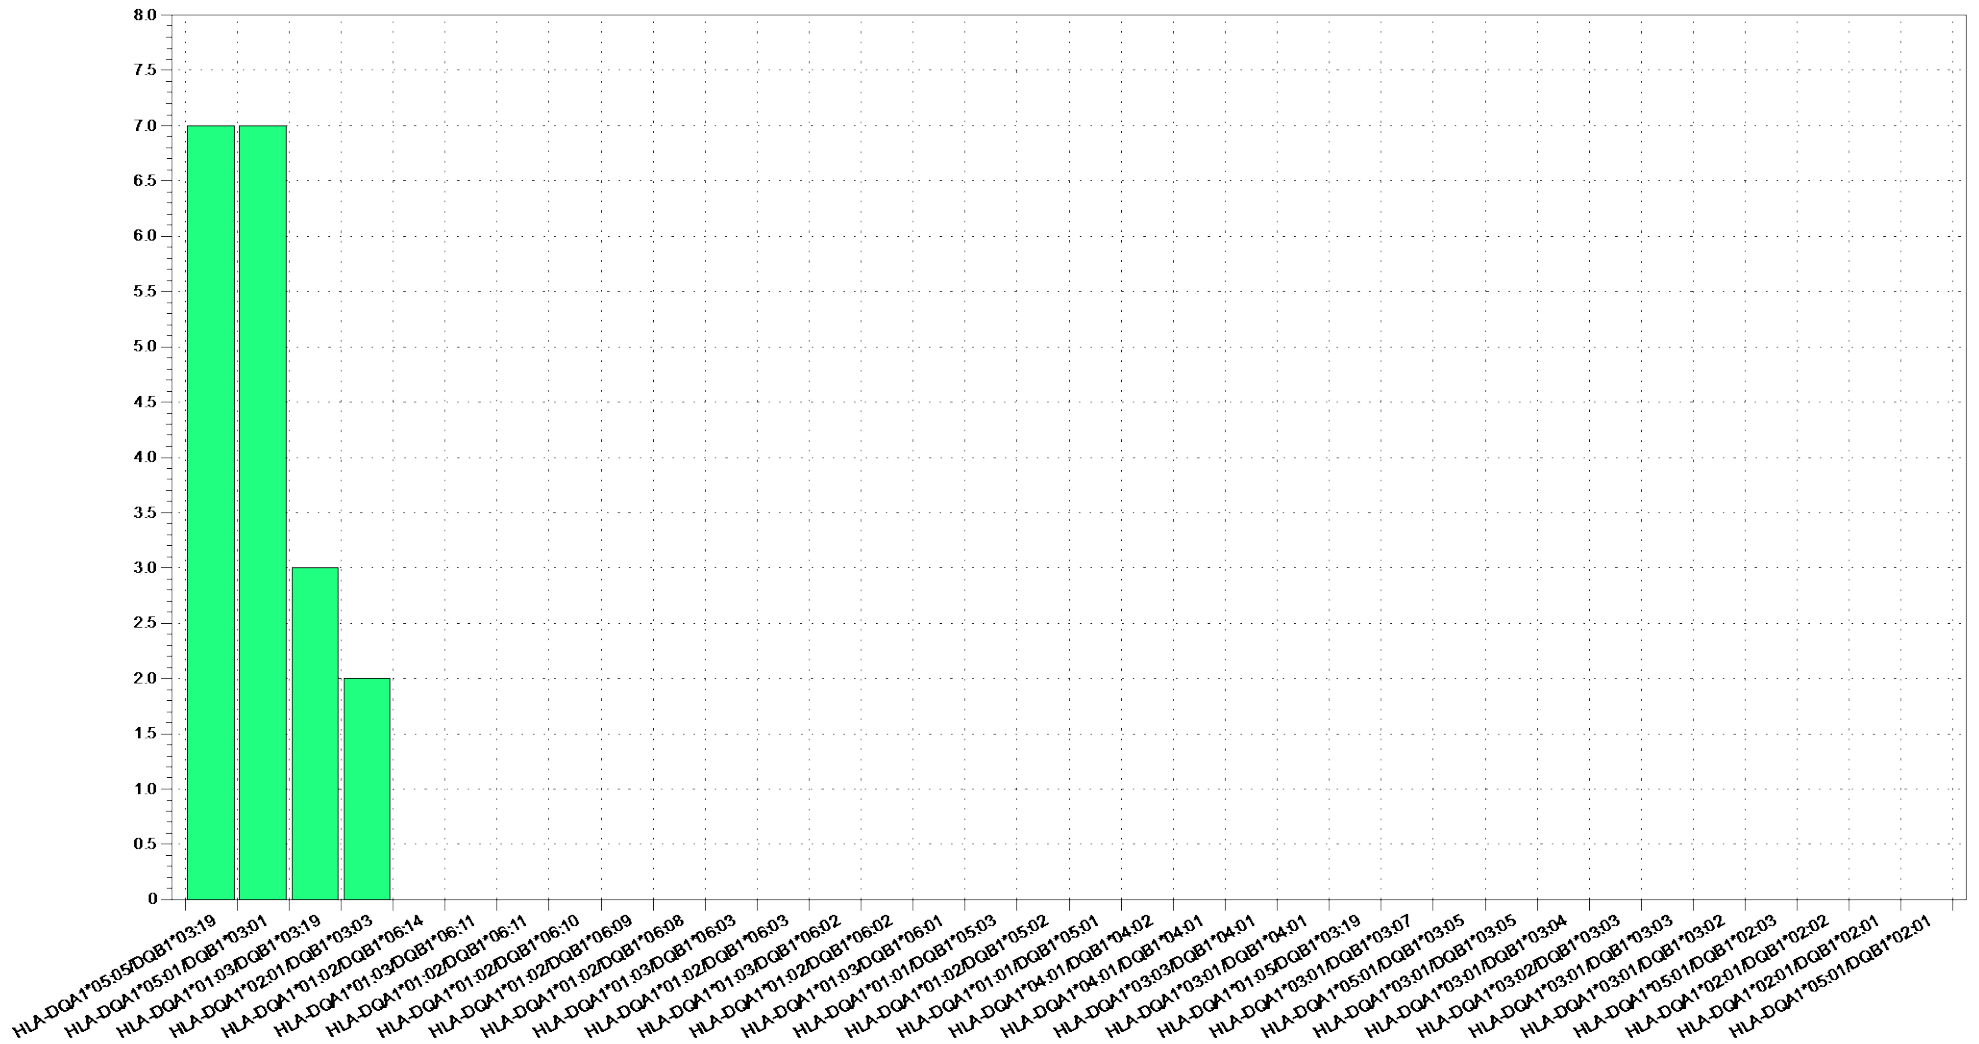

Allele combinations are ordered on the x-axis by their strong (IC<sub>50</sub> ≤ 50 nM) binding prediction and the number of peptides presented are displayed on the y-axis.

## HLA-DQA1/-DQB1 alleles ordered by number of presented peptides with regular binding prediction

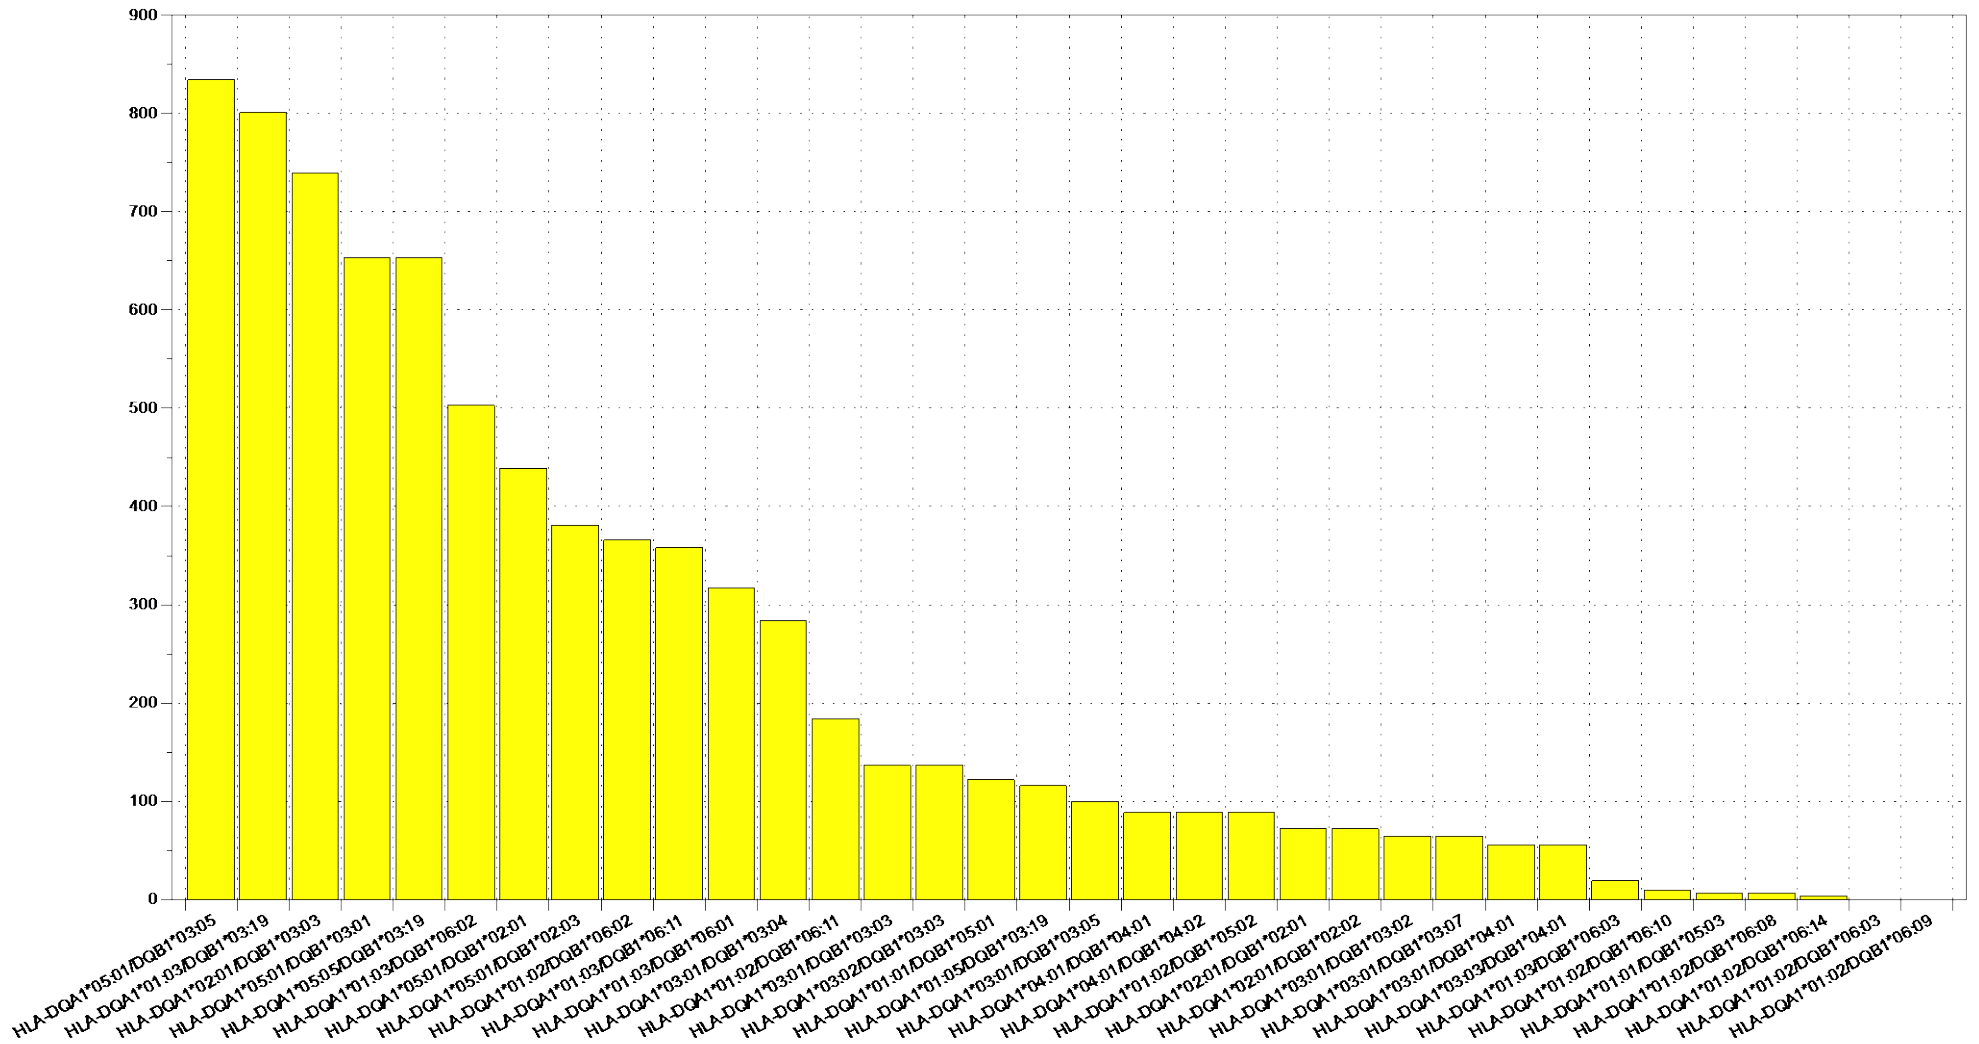

Allele combinations are ordered on the x-axis by their regular ( $50 \text{ nM} < IC_{50} \leq 1000 \text{ nM}$ ) binding prediction and the number of peptides presented are displayed on the y-axis.

## HLA-DQA1/DQB1 alleles ordered by number of presented peptides with weak binding prediction

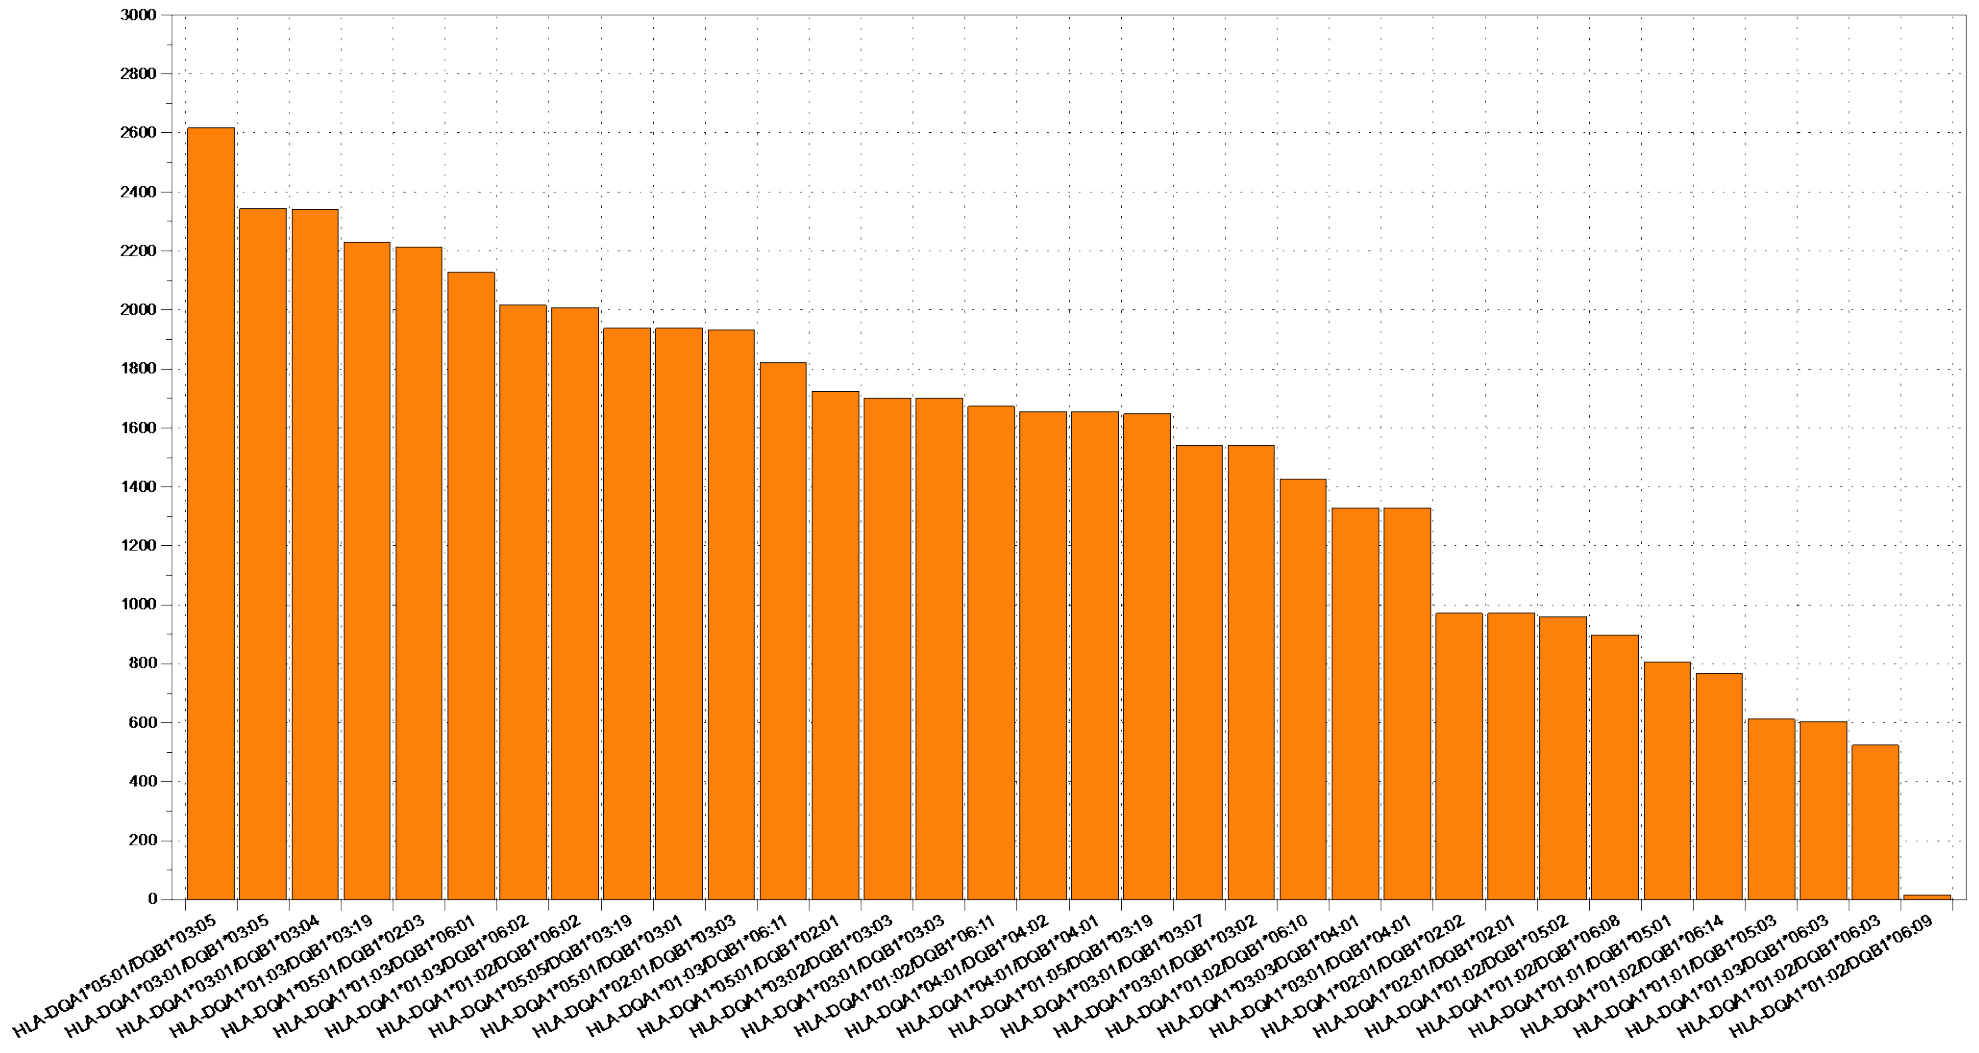

Allele combinations are ordered on the x-axis by their weak ( $1000 \text{ nM} < IC_{50} \leq 5000 \text{ nM}$ ) binding prediction and the number of peptides presented are displayed on the y-axis.
