# Supplementary material
Source: PubMed Central journal article supplement (PMC7300650)
Supplement: TAN-96-277-s011.pdf [file TAN-96-277-s011.pdf]

**Supplementary Table S2. Detailed list of population samples used in this study**

| <b>Geographic Region</b> | <b>Sample size</b> | <b>Population</b>  | <b>Country</b> | <b>Latitude</b> | <b>Longitude</b> | <b>A</b> | <b>B</b> | <b>C</b> | <b>DQA1</b> | <b>DQB1</b> | <b>DRB1</b> | <b>References</b> |
|--------------------------|--------------------|--------------------|----------------|-----------------|------------------|----------|----------|----------|-------------|-------------|-------------|-------------------|
| SAF                      | 44                 | Akan               | Ivory Coast    | 5.0             | -4.0             | No       | Yes      | No       | No          | No          | No          | (1)               |
| SAF                      | 90                 | Bantu              | Congo          | 0.1             | 18.3             | No       | No       | No       | Yes         | Yes         | No          | (2)               |
| SAF                      | 77                 | Cameroon           | Cameroon       | 5.5             | 10.4             | No       | Yes      | Yes      | No          | No          | No          | (3)               |
| SAF                      | 174                | Cameroon           | Cameroon       | 2.9             | 11.2             | Yes      | Yes      | Yes      | No          | No          | No          | (3)               |
| SAF                      | 126                | Cameroon           | Cameroon       | 3.9             | 11.5             | No       | No       | No       | Yes         | Yes         | Yes         | (4)               |
| SAF                      | 13                 | Cameroon           | Cameroon       | 4.8             | 10.0             | Yes      | Yes      | Yes      | No          | No          | No          | (3)               |
| SAF                      | 92                 | Cameroon           | Cameroon       | 3.9             | 11.5             | Yes      | Yes      | No       | No          | No          | No          | (5)               |
| SAF                      | 129                | Dogon              | Mali           | 14.4            | -3.6             | Yes      | Yes      | Yes      | No          | No          | Yes         | (6)               |
| SAF                      | 138                | Dogon              | Mali           | 14.1            | -3.1             | Yes      | Yes      | Yes      | No          | No          | No          | (7)               |
| SAF                      | 167                | Haut-Ogooue Dienga | Gabon          | -1.6            | 13.6             | No       | No       | No       | Yes         | Yes         | No          | (8)               |
| SAF                      | 131                | Ga-Adangbe         | Ghana          | 5.8             | 0.2              | Yes      | Yes      | Yes      | No          | No          | No          | (9)               |
| SAF                      | 48                 | Balanta            | Guinea Bissau  | 11.3            | -15.1            | Yes      | No       | No       | No          | No          | No          | (10)              |
| SAF                      | 23                 | Bijago             | Guinea Bissau  | 11.3            | -15.9            | Yes      | No       | No       | No          | No          | No          | (10)              |
| SAF                      | 31                 | Fula               | Guinea Bissau  | 12.4            | -14.4            | Yes      | No       | No       | No          | No          | No          | (10)              |
| SAF                      | 25                 | Papel              | Guinea Bissau  | 12.1            | -15.9            | Yes      | No       | No       | No          | No          | No          | (10)              |
| SAF                      | 65                 | Guinea Bissau      | Guinea Bissau  | 12.0            | -15.0            | Yes      | Yes      | No       | No          | No          | Yes         | (11)              |
| SAF                      | 265                | Luo                | Kenya          | -0.1            | 34.6             | Yes      | Yes      | Yes      | No          | No          | No          | (7)               |
| SAF                      | 240                | Nandi              | Kenya          | 0.3             | 35.0             | Yes      | Yes      | Yes      | No          | No          | No          | (7)               |
| SAF                      | 144                | Kenyan             | Kenya          | -1.5            | 36.1             | Yes      | Yes      | Yes      | Yes         | Yes         | No          | (6)               |
| SAF                      | 112                | Kenyan             | Kenya          | -1.3            | 36.8             | Yes      | Yes      | Yes      | Yes         | Yes         | No          | (6)               |

|     |     |                       |              |       |       |     |     |     |     |     |     |      |
|-----|-----|-----------------------|--------------|-------|-------|-----|-----|-----|-----|-----|-----|------|
| SAF | 165 | Mandenka              | Senegal      | 12.6  | -12.2 | Yes | Yes | No  | No  | No  | No  | (12) |
| SAF | 163 | Merina                | Madagascar   | -18.4 | 47.2  | No  | No  | No  | Yes | Yes | Yes | (13) |
| SAF | 93  | Pygmy Aka             | Congo        | 3.1   | 18.1  | No  | No  | No  | No  | No  | Yes | (2)  |
| SAF | 281 | Kigali Hutu and Tutsi | Rwanda       | -2.0  | 30.1  | No  | No  | No  | No  | No  | Yes | (6)  |
| SAF | 32  | Angolar               | Sao Tome     | 0.3   | 6.7   | Yes | Yes | No  | No  | No  | Yes | (14) |
| SAF | 66  | Forro                 | Sao Tome     | 0.3   | 6.7   | Yes | Yes | No  | No  | No  | Yes | (14) |
| SAF | 230 | Shona                 | Zimbabwe     | -17.9 | 31.0  | Yes | Yes | Yes | Yes | Yes | Yes | (6)  |
| SAF | 200 | South African         | South Africa | -30.0 | 25.0  | Yes | Yes | Yes | No  | No  | Yes | (15) |
| SAF | 100 | Zulu                  | South Africa | -29.0 | 31.0  | Yes | No  | No  | No  | No  | No  | (16) |
| SAF | 161 | Ugandan               | Uganda       | 0.0   | 32.1  | Yes | Yes | Yes | No  | No  | No  | (7)  |
| SAF | 175 | Ugandan               | Uganda       | 0.3   | 32.5  | Yes | Yes | Yes | No  | No  | No  | (17) |
| SAF | 82  | Xhosa                 | South Africa | -32.3 | 22.7  | Yes | Yes | Yes | No  | No  | No  | (18) |
| SAF | 44  | Lusaka                | Zambia       | -15.4 | 28.3  | Yes | Yes | Yes | No  | No  | No  | (7)  |
| SAF | 43  | Zambians              | Zambia       | -15.0 | 28.3  | Yes | Yes | Yes | No  | No  | No  | (6)  |
| SAF | 186 | Zulu                  | South Africa | -30.0 | 31.0  | Yes | Yes | Yes | Yes | Yes | Yes | (6)  |
| SAF | 69  | Amhara                | Morocco      | 11.2  | 39.9  | No  | No  | No  | No  | No  | Yes | (6)  |
| NAF | 67  | Arab Chaouya          | Morocco      | 33.0  | -7.4  | Yes | Yes | No  | No  | No  | Yes | (6)  |
| NAF | 70  | Arab Chaouya          | Morocco      | 30.4  | -7.4  | Yes | Yes | Yes | Yes | Yes | Yes | (19) |
| NAF | 58  | Arab                  | Algeria      | 35.4  | -0.4  | No  | No  | No  | No  | No  | Yes | (13) |
| NAF | 99  | Arab                  | Algeria      | 35.5  | -0.4  | No  | No  | No  | No  | No  | Yes | (6)  |
| NAF | 97  | Arab                  | Algeria      | 36.7  | 3.2   | No  | No  | No  | No  | No  | Yes |      |
| NAF | 97  | Arab                  | Algeria      | 35.8  | -0.6  | No  | No  | No  | No  | No  | Yes | (18) |
| NAF | 100 | Arab                  | Algeria      | 35.7  | -0.7  | No  | No  | No  | No  | No  | Yes | (6)  |
| NAF | 98  | Arab                  | Morocco      | 30.3  | -9.4  | No  | No  | No  | Yes | Yes | Yes | (6)  |
| NAF | 91  | Arab                  | Morocco      | 33.2  | -8.5  | No  | No  | No  | No  | No  | Yes | (6)  |
| NAF | 98  | Arab                  | Morocco      | 30.5  | -8.9  | No  | No  | No  | Yes | Yes | No  | (20) |

|     |       |          |          |      |      |     |     |     |     |     |     |                        |
|-----|-------|----------|----------|------|------|-----|-----|-----|-----|-----|-----|------------------------|
| NAF | 95    | Arab     | Tunisia  | 33.9 | 10.1 | Yes | Yes | No  | No  | No  | Yes | (21)                   |
| NAF | 96    | Arab     | Tunisia  | 33.9 | 10.1 | No  | No  | No  | No  | No  | Yes | (22)                   |
| NAF | 82    | Arab     | Tunisia  | 33.0 | 10.3 | No  | No  | No  | No  | No  | Yes | (23)                   |
| NAF | 104   | Arab     | Tunisia  | 36.8 | 10.2 | No  | No  | No  | No  | No  | Yes | (23)                   |
| NAF | 111   | Arab     | Tunisia  | 36.8 | 10.2 | No  | No  | No  | No  | No  | Yes | (24)                   |
| NAF | 52    | Arab     | Tunisia  | 34.5 | 9.3  | No  | No  | No  | No  | No  | Yes | (18)                   |
| NAF | 100   | Arab     | Tunisia  | 35.0 | 9.0  | Yes | No  | No  | Yes | Yes | Yes | (25)                   |
| NAF | 68    | Berber   | Morocco  | 35.3 | -4.0 | Yes | Yes | No  | No  | No  | Yes | (6)                    |
| NAF | 63    | Berber   | Morocco  | 35.2 | -3.1 | Yes | Yes | Yes | Yes | Yes | Yes | (6)                    |
| NAF | 99    | Berber   | Morocco  | 35.2 | -2.9 | No  | No  | No  | No  | No  | Yes | (26)                   |
| NAF | 73    | Berber   | Morocco  | 35.2 | -2.9 | Yes | Yes | Yes | No  | No  | No  | (27)                   |
| NAF | 55    | Berber   | Tunisia  | 33.8 | 10.9 | No  | No  | No  | No  | No  | Yes | (22)                   |
| NAF | 81    | Berber   | Tunisia  | 33.5 | 10.0 | No  | No  | No  | No  | No  | Yes | (22)                   |
| NAF | 40    | Copts    | Egypt    | 30.0 | 31.0 | No  | No  | No  | Yes | Yes | Yes | Personal communication |
| NAF | 98    | Amhara   | Ethiopia | 9.0  | 38.7 | No  | No  | No  | No  | No  | Yes | (28)                   |
| NAF | 83    | Oromo    | Ethiopia | 9.0  | 38.7 | No  | No  | No  | No  | No  | Yes | (28)                   |
| NAF | 230   | Sudanese | Sudan    | 15.6 | 32.5 | Yes | Yes | Yes | No  | No  | Yes | (29)                   |
| NAF | 52    | Tunisian | Tunisia  | 33.0 | 10.4 | No  | No  | No  | No  | No  | Yes | (18)                   |
| EUR | 82    | Chuvash  | Russia   | 55.5 | 47.0 | No  | No  | No  | No  | No  | Yes | (30)                   |
| EUR | 145   | Albanian | Albania  | 41.0 | 20.0 | No  | No  | Yes | No  | No  | Yes | (18)                   |
| EUR | 120   | Albanian | Kosovo   | 42.6 | 21.0 | Yes | Yes | Yes | No  | No  | Yes | (29)                   |
| EUR | 57    | Austrian | Austria  | 47.1 | 10.9 | Yes | No  | No  | No  | No  | No  | (18)                   |
| EUR | 83    | Basque   | Spain    | 43.0 | -3.0 | No  | No  | No  | No  | No  | Yes | (31)                   |
| EUR | 34838 | Belgian  | Belgium  | 50.8 | 4.0  | No  | No  | No  | No  | No  | Yes |                        |
| EUR | 40    | Belgian  | Belgium  | 50.3 | 4.5  | No  | No  | No  | Yes | Yes | No  | (13)                   |
| EUR | 354   | British  | UK       | 52.1 | -0.4 | No  | No  | No  | No  | No  | Yes | (32)                   |
| EUR | 177   | British  | UK       | 51.5 | -0.1 | No  | No  | No  | Yes | Yes | Yes | (33)                   |
| EUR | 298   | British  | UK       | 53.0 | -3.0 | Yes | Yes | Yes | No  | No  | Yes | (34)                   |

|     |      |                |             |      |      |     |     |     |     |     |     |      |
|-----|------|----------------|-------------|------|------|-----|-----|-----|-----|-----|-----|------|
| EUR | 1000 | British        | UK          | 52.5 | -3.5 | Yes | Yes | Yes | No  | No  | Yes | (29) |
| EUR | 55   | Bulgarian      | Bulgaria    | 42.0 | 23.0 | Yes | Yes | No  | No  | No  | No  | (35) |
| EUR | 4000 | Croatian       | Croatia     | 45.8 | 15.9 | Yes | Yes | No  | No  | No  | Yes | (36) |
| EUR | 63   | Croatian       | Croatia     | 45.5 | 15.6 | No  | No  | No  | Yes | Yes | No  | (37) |
| EUR | 28   | Croatian       | Croatia     | 45.1 | 14.6 | No  | No  | No  | Yes | Yes | No  | (38) |
| EUR | 23   | Croatian       | Croatia     | 45.1 | 14.6 | No  | No  | No  | No  | No  | Yes | (38) |
| EUR | 28   | Croatian       | Croatia     | 45.1 | 14.6 | No  | No  | No  | Yes | Yes | Yes | (38) |
| EUR | 102  | Croatian       | Croatia     | 45.0 | 14.5 | No  | No  | No  | Yes | Yes | Yes | (13) |
| EUR | 104  | Croatian       | Croatia     | 43.1 | 16.3 | No  | No  | No  | Yes | Yes | No  | (13) |
| EUR | 139  | Croatian       | Croatia     | 45.2 | 15.5 | No  | No  | No  | No  | No  | Yes | (13) |
| EUR | 150  | Croatian       | Croatia     | 45.5 | 15.6 | Yes | Yes | No  | No  | No  | No  | (6)  |
| EUR | 202  | Croatian       | Croatia     | 45.8 | 16.0 | Yes | Yes | No  | No  | No  | Yes | (29) |
| EUR | 5099 | Czech          | Czechia     | 49.8 | 15.5 | Yes | Yes | Yes | No  | No  | Yes | (39) |
| EUR | 103  | Czech          | Czechia     | 50.0 | 14.3 | Yes | Yes | Yes | Yes | Yes | Yes | (6)  |
| EUR | 55   | Denmark        | Denmark     | 55.7 | 12.6 | No  | No  | No  | No  | No  | Yes | (40) |
| EUR | 1305 | Dutch          | Netherlands | 52.1 | 4.5  | Yes | No  | No  | No  | No  | No  | (39) |
| EUR | 447  | Dutch          | Netherlands | 52.0 | 7.0  | No  | No  | No  | No  | No  | Yes | (39) |
| EUR | 234  | French         | France      | 50.4 | 3.1  | No  | No  | No  | No  | No  | Yes | (13) |
| EUR | 224  | French         | France      | 48.0 | 0.0  | No  | No  | No  | Yes | Yes | No  | (13) |
| EUR | 1431 | French         | France      | 43.6 | 3.9  | No  | No  | Yes | No  | No  | Yes | (29) |
| EUR | 130  | French         | France      | 46.0 | 5.0  | Yes | Yes | Yes | No  | No  | Yes | (39) |
| EUR | 100  | French         | France      | 48.0 | -2.0 | No  | No  | Yes | No  | No  | Yes | (39) |
| EUR | 174  | German         | Germany     | 51.5 | 7.0  | No  | No  | No  | Yes | Yes | No  | (39) |
| EUR | 111  | German         | Germany     | 50.8 | 8.8  | No  | No  | No  | Yes | Yes | Yes | (41) |
| EUR | 8862 | German         | Germany     | 50.8 | 8.8  | Yes | Yes | Yes | No  | No  | Yes | (42) |
| EUR | 101  | Greek-Cypriots | Greece      | 35.0 | 33.3 | Yes | Yes | No  | No  | No  | No  | (13) |
| EUR | 246  | Greek          | Greece      | 38.0 | 23.7 | No  | No  | No  | No  | No  | Yes | (43) |
| EUR | 192  | Greek          | Greece      | 38.0 | 25.3 | Yes | Yes | No  | Yes | Yes | Yes | (13) |

|     |      |            |           |      |      |     |     |     |     |     |     |      |
|-----|------|------------|-----------|------|------|-----|-----|-----|-----|-----|-----|------|
| EUR | 144  | Greek      | Greece    | 39.0 | 22.0 | Yes | Yes | Yes | No  | No  | Yes | (18) |
| EUR | 232  | Greek      | Greece    | 39.0 | 22.0 | Yes | Yes | Yes | No  | No  | Yes | (29) |
| EUR | 120  | Greek      | Greece    | 38.0 | 23.7 | No  | No  | No  | Yes | Yes | No  | (39) |
| EUR | 242  | Greek      | Greece    | 38.0 | 23.7 | Yes | Yes | Yes | No  | No  | Yes | (39) |
| EUR | 83   | Greek      | Greece    | 38.0 | 23.7 | Yes | Yes | Yes | No  | No  | Yes | (39) |
| EUR | 98   | Greek      | Greece    | 38.0 | 23.7 | No  | No  | No  | Yes | Yes | No  | (44) |
| EUR | 1000 | Irish      | Ireland   | 54.7 | -6.7 | Yes | Yes | Yes | No  | No  | Yes | (6)  |
| EUR | 1000 | Irish      | Ireland   | 54.7 | -6.8 | No  | Yes | No  | No  | No  | No  | (45) |
| EUR | 1000 | Irish      | Ireland   | 54.7 | -6.8 | No  | No  | Yes | No  | No  | No  | (46) |
| EUR | 1000 | Irish      | Ireland   | 54.7 | -6.8 | No  | No  | No  | No  | No  | Yes | (47) |
| EUR | 250  | Irish      | Ireland   | 53.3 | -6.2 | Yes | Yes | Yes | No  | No  | Yes | (39) |
| EUR | 975  | Italian    | Italy     | 45.5 | 9.2  | Yes | Yes | Yes | No  | No  | Yes | (48) |
| EUR | 380  | Italian    | Italy     | 41.9 | 12.5 | No  | No  | No  | Yes | Yes | Yes | (39) |
| EUR | 93   | Italian    | Italy     | 45.1 | 9.1  | No  | No  | No  | Yes | Yes | No  | (13) |
| EUR | 98   | Italian    | Italy     | 45.4 | 9.4  | No  | No  | No  | Yes | Yes | Yes | (13) |
| EUR | 53   | Italian    | Italy     | 41.9 | 12.5 | No  | No  | No  | Yes | Yes | No  | (49) |
| EUR | 179  | Italian    | Italy     | 41.7 | 15.7 | No  | No  | No  | Yes | Yes | No  | (50) |
| EUR | 97   | Italian    | Italy     | 43.0 | 12.0 | No  | No  | No  | Yes | Yes | No  | (39) |
| EUR | 277  | Italian    | Italy     | 45.4 | 9.2  | No  | No  | Yes | No  | No  | No  | (51) |
| EUR | 100  | Italian    | Italy     | 41.9 | 12.4 | No  | No  | No  | Yes | Yes | Yes | (39) |
| EUR | 141  | Italian    | Italy     | 40.8 | 14.2 | No  | No  | Yes | No  | No  | No  | (51) |
| EUR | 158  | Macedonian | Macedonia | 42.0 | 21.4 | No  | No  | No  | No  | No  | Yes | (52) |
| EUR | 172  | Macedonian | Macedonia | 42.0 | 22.0 | No  | No  | No  | No  | No  | Yes | (53) |
| EUR | 218  | Macedonian | Macedonia | 41.8 | 22.0 | No  | No  | Yes | No  | No  | Yes | (18) |
| EUR | 247  | Macedonian | Macedonia | 41.8 | 22.0 | No  | Yes | No  | No  | No  | No  | (18) |
| EUR | 181  | Norwegian  | Norway    | 59.9 | 10.8 | No  | No  | No  | Yes | Yes | Yes | (54) |
| EUR | 200  | Polish     | Poland    | 51.1 | 17.0 | No  | Yes | Yes | No  | No  | Yes | (55) |
| EUR | 98   | Polish     | Poland    | 52.3 | 16.5 | No  | No  | No  | Yes | Yes | Yes | (13) |
| EUR | 99   | Polish     | Poland    | 51.0 | 15.0 | No  | No  | No  | Yes | Yes | Yes | (13) |

|     |     |            |          |      |       |     |     |     |     |     |     |      |
|-----|-----|------------|----------|------|-------|-----|-----|-----|-----|-----|-----|------|
| EUR | 100 | Pomaki     | Bulgaria | 41.1 | 24.6  | No  | No  | No  | Yes | Yes | Yes | (13) |
| EUR | 59  | Portuguese | Portugal | 38.0 | -28.0 | Yes | Yes | No  | No  | No  | Yes | (56) |
| EUR | 43  | Portuguese | Portugal | 37.0 | -25.1 | Yes | Yes | No  | No  | No  | Yes | (56) |
| EUR | 130 | Portuguese | Portugal | 38.7 | -27.3 | No  | Yes | No  | Yes | Yes | Yes | (39) |
| EUR | 50  | Portuguese | Portugal | 39.0 | -8.0  | Yes | Yes | No  | No  | No  | Yes | (57) |
| EUR | 111 | Portuguese | Portugal | 39.0 | -9.0  | No  | No  | No  | Yes | Yes | No  | (13) |
| EUR | 173 | Portuguese | Portugal | 32.7 | -17.0 | No  | No  | No  | No  | No  | Yes | (58) |
| EUR | 185 | Portuguese | Portugal | 32.7 | -17.0 | Yes | Yes | No  | No  | No  | Yes | (59) |
| EUR | 46  | Portuguese | Portugal | 41.0 | -8.0  | Yes | Yes | No  | No  | No  | Yes | (57) |
| EUR | 49  | Portuguese | Portugal | 37.0 | -8.0  | Yes | Yes | No  | No  | No  | Yes | (57) |
| EUR | 99  | Romanian   | Romania  | 44.3 | 26.1  | No  | No  | No  | No  | No  | Yes | (13) |
| EUR | 200 | Russian    | Russia   | 59.9 | 30.3  | No  | No  | No  | Yes | Yes | Yes | (60) |
| EUR | 108 | Russian    | Russia   | 60.1 | 40.9  | Yes | Yes | No  | No  | No  | Yes | (29) |
| EUR | 80  | Sardinian  | Italy    | 40.0 | 9.0   | No  | No  | No  | Yes | Yes | Yes | (13) |
| EUR | 140 | Slovenian  | Slovenia | 46.0 | 14.5  | No  | No  | No  | Yes | Yes | Yes | (61) |
| EUR | 100 | Slovenian  | Slovenia | 46.2 | 15.0  | No  | No  | No  | No  | No  | Yes | (39) |
| EUR | 100 | Slovenian  | Slovenia | 46.0 | 14.0  | No  | No  | No  | Yes | Yes | Yes | (6)  |
| EUR | 99  | Spanish    | Spain    | 37.4 | -6.0  | No  | No  | Yes | No  | No  | Yes | (39) |
| EUR | 941 | Spanish    | Spain    | 41.4 | 2.2   | No  | No  | No  | No  | No  | Yes | (62) |
| EUR | 125 | Spanish    | Spain    | 40.3 | -3.4  | No  | No  | No  | No  | No  | Yes | (13) |
| EUR | 100 | Spanish    | Spain    | 40.3 | -3.4  | No  | No  | No  | Yes | Yes | Yes | (13) |
| EUR | 173 | Spanish    | Spain    | 38.0 | -1.1  | No  | No  | No  | Yes | Yes | Yes | (63) |
| EUR | 95  | Spanish    | Spain    | 43.0 | -4.0  | No  | No  | No  | No  | No  | Yes | (31) |
| EUR | 83  | Spanish    | Spain    | 43.0 | -3.0  | No  | No  | No  | No  | No  | Yes | (31) |
| EUR | 88  | Spanish    | Spain    | 43.0 | -3.0  | No  | No  | No  | No  | No  | Yes | (31) |
| EUR | 278 | Spanish    | Spain    | 37.4 | -6.0  | No  | No  | Yes | No  | No  | No  | (39) |
| EUR | 90  | Finns      | Finland  | 60.2 | 25.1  | Yes | Yes | Yes | No  | No  | No  | (6)  |
| EUR | 150 | Finns      | Finland  | 60.1 | 25.0  | No  | No  | No  | No  | No  | Yes | (29) |
| EUR | 150 | Finns      | Finland  | 64.0 | 26.0  | No  | No  | No  | No  | No  | Yes | (64) |

|     |     |                |              |      |      |     |     |     |     |     |     |      |
|-----|-----|----------------|--------------|------|------|-----|-----|-----|-----|-----|-----|------|
| EUR | 154 | Northern Sami  | Sweden       | 67.0 | 18.5 | Yes | Yes | No  | Yes | Yes | Yes | (65) |
| EUR | 130 | Southern Sami  | Sweden       | 60.9 | 14.7 | Yes | Yes | No  | Yes | Yes | Yes | (65) |
| SWA | 101 | Arab Druze     | Israel       | 31.1 | 35.0 | Yes | Yes | Yes | No  | No  | No  | (6)  |
| SWA | 146 | Arab           | Jordan       | 31.6 | 36.3 | No  | No  | No  | Yes | Yes | No  | (66) |
| SWA | 94  | Arab           | Lebanon      | 33.9 | 35.5 | No  | No  | No  | No  | No  | Yes | (13) |
| SWA | 191 | Arab           | Lebanon      | 33.9 | 35.5 | No  | No  | No  | No  | No  | Yes | (67) |
| SWA | 61  | Arab           | Lebanon      | 33.6 | 35.8 | No  | No  | No  | No  | No  | Yes | (13) |
| SWA | 82  | Arab           | Lebanon      | 33.9 | 35.5 | No  | No  | No  | No  | No  | Yes | (13) |
| SWA | 119 | Arab           | Oman         | 21.0 | 57.0 | Yes | Yes | No  | No  | No  | No  | (6)  |
| SWA | 118 | Arab           | Oman         | 22.0 | 56.0 | No  | Yes | No  | No  | No  | No  | (68) |
| SWA | 50  | Arab           | Saudi Arabia | 24.7 | 46.7 | No  | No  | No  | No  | No  | Yes | (69) |
| SWA | 213 | Arab           | Saudi Arabia | 27.5 | 41.7 | Yes | Yes | Yes | No  | No  | Yes | (39) |
| SWA | 158 | Arab           | Saudi Arabia | 24.6 | 46.7 | Yes | Yes | Yes | No  | No  | Yes | (70) |
| SWA | 40  | Ashkenazi-Jews | Palestine    | 31.5 | 35.1 | No  | Yes | No  | No  | No  | Yes | (13) |
| SWA | 109 | Jews           | Israel       | 32.0 | 34.5 | Yes | Yes | Yes | No  | No  | No  | (6)  |
| SWA | 258 | Libanese       | Libanon      | 33.5 | 35.3 | No  | No  | No  | No  | No  | Yes | (13) |
| SWA | 40  | Jews           | Libya        | 31.5 | 35.1 | No  | Yes | No  | No  | No  | Yes | (13) |
| SWA | 40  | Jews           | Morocco      | 31.5 | 35.1 | No  | Yes | No  | No  | No  | Yes | (13) |
| SWA | 245 | Turks          | Turkey       | 41.0 | 28.6 | No  | No  | No  | No  | No  | Yes | (6)  |
| SWA | 69  | Turkuman       | Iran         | 36.8 | 54.4 | Yes | Yes | No  | No  | No  | Yes | (71) |
| SWA | 37  | Munda          | India        | 23.4 | 85.3 | Yes | Yes | No  | No  | No  | Yes | (18) |
| SWA | 80  | Georgian Svan  | Georgia      | 42.9 | 43.0 | Yes | Yes | No  | Yes | Yes | Yes | (72) |
| SWA | 109 | Georgian       | Georgia      | 41.7 | 45.0 | Yes | Yes | Yes | No  | No  | No  | (6)  |
| SWA | 105 | Georgian       | Geogia       | 41.7 | 44.9 | Yes | Yes | Yes | No  | No  | No  | (6)  |

|     |     |                  |          |      |      |     |     |     |     |     |     |      |
|-----|-----|------------------|----------|------|------|-----|-----|-----|-----|-----|-----|------|
| SWA | 48  | Tamil            | India    | 11.0 | 79.0 | Yes | Yes | Yes | No  | No  | No  | (6)  |
| SWA | 100 | Armenian         | Armenia  | 40.2 | 44.5 | Yes | No  | No  | No  | No  | Yes | (73) |
| SWA | 100 | Azeri            | Iran     | 36.6 | 48.4 | No  | No  | No  | Yes | Yes | Yes | (74) |
| SWA | 100 | Baloch           | Iran     | 29.5 | 60.9 | Yes | Yes | Yes | Yes | Yes | No  | (74) |
| SWA | 66  | Baloch           | Pakistan | 30.5 | 66.5 | Yes | No  | No  | No  | No  | No  | (75) |
| SWA | 104 | Brahui           | Pakistan | 30.0 | 67.0 | Yes | No  | No  | No  | No  | No  | (75) |
| SWA | 92  | Burusho          | Pakistan | 36.5 | 74.0 | Yes | No  | No  | No  | No  | No  | (75) |
| SWA | 100 | Druzes           | Israel   | 32.0 | 34.5 | Yes | Yes | Yes | No  | No  | No  | (6)  |
| SWA | 46  | Hunza-Burushaski | Pakistan | 36.2 | 74.4 | No  | Yes | Yes | No  | No  | No  | (13) |
| SWA | 111 | Indian           | India    | 17.1 | 78.1 | Yes | No  | No  | No  | No  | No  | (6)  |
| SWA | 90  | Indian           | India    | 28.6 | 77.2 | No  | Yes | Yes | No  | No  | No  | (76) |
| SWA | 104 | Indian           | India    | 17.5 | 78.5 | Yes | Yes | No  | No  | No  | Yes | (6)  |
| SWA | 50  | Indian           | India    | 20.9 | 74.8 | Yes | Yes | Yes | No  | No  | No  | (77) |
| SWA | 123 | Indian           | India    | 26.4 | 80.2 | No  | No  | No  | Yes | Yes | No  | (39) |
| SWA | 91  | Indian           | India    | 19.0 | 72.8 | Yes | Yes | Yes | No  | No  | Yes | (78) |
| SWA | 56  | Indian           | India    | 28.6 | 77.2 | Yes | Yes | Yes | No  | No  | No  | (6)  |
| SWA | 71  | Indian           | India    | 28.6 | 77.2 | Yes | Yes | Yes | No  | No  | No  | (6)  |
| SWA | 155 | Indian           | India    | 26.8 | 80.9 | No  | No  | No  | Yes | Yes | No  | (79) |
| SWA | 63  | Indian           | India    | 27.3 | 89.0 | No  | No  | No  | Yes | Yes | No  | (79) |
| SWA | 98  | Indian           | India    | 22.6 | 88.3 | No  | No  | No  | Yes | Yes | No  | (79) |
| SWA | 196 | Indian           | India    | 26.8 | 80.9 | No  | No  | No  | Yes | Yes | No  | (79) |
| SWA | 190 | Indian           | India    | 26.8 | 80.9 | No  | No  | No  | Yes | Yes | No  | (79) |
| SWA | 188 | Indian           | India    | 26.8 | 80.9 | No  | No  | No  | Yes | Yes | No  | (79) |
| SWA | 198 | Indian           | India    | 26.8 | 80.9 | No  | No  | No  | Yes | Yes | No  | (79) |
| SWA | 202 | Indian           | India    | 26.8 | 80.9 | No  | No  | No  | Yes | Yes | No  | (80) |
| SWA | 50  | Indian           | India    | 19.0 | 76.0 | No  | Yes | Yes | No  | No  | No  | (81) |
| SWA | 58  | Iran             | Iran     | 35.7 | 51.4 | No  | No  | No  | Yes | Yes | No  | (82) |
| SWA | 100 | Iranian          | Iran     | 35.7 | 51.3 | No  | No  | No  | No  | No  | Yes | (83) |



|     |       |             |             |      |       |     |     |     |     |     |     |      |
|-----|-------|-------------|-------------|------|-------|-----|-----|-----|-----|-----|-----|------|
| SWA | 120   | Iranian     | Iran        | 35.7 | 51.4  | No  | No  | No  | No  | No  | Yes | (84) |
| SWA | 69    | Kalash      | Pakistan    | 36.0 | 71.5  | Yes | No  | No  | No  | No  | No  | (75) |
| SWA | 190   | Kayastha    | India       | 26.8 | 80.9  | No  | No  | No  | Yes | Yes | No  | (79) |
| SWA | 31    | Kurd        | Georgia     | 41.7 | 45.0  | Yes | Yes | Yes | No  | No  | No  | (6)  |
| SWA | 100   | Kurd        | Iran        | 35.3 | 47.0  | No  | No  | No  | Yes | Yes | Yes | (74) |
| SWA | 29    | Kurdish     | Iran        | 41.7 | 44.9  | Yes | Yes | Yes | No  | No  | No  | (6)  |
| SWA | 73    | Parsi       | Iran        | 27.6 | 52.5  | No  | No  | No  | Yes | Yes | Yes | (39) |
| SWA | 36    | Pathan      | Pakistan    | 33.4 | 73.1  | Yes | Yes | Yes | No  | No  | No  | (13) |
| SWA | 42    | Punjabi     | Pakistan    | 28.4 | 77.1  | No  | No  | No  | Yes | Yes | No  | (13) |
| SWA | 39    | Sindhi      | India       | 24.5 | 67.0  | Yes | Yes | Yes | No  | No  | No  | (13) |
| SWA | 61    | Tamil       | India       | 8.0  | 77.0  | Yes | Yes | Yes | No  | No  | No  | (85) |
| SWA | 65    | Zoroastrian | Iran        | 31.9 | 54.4  | No  | No  | No  | Yes | Yes | Yes | (39) |
| NEA | 117   | Japanese    | Japan       | 35.7 | 139.8 | Yes | Yes | Yes | No  | No  | No  | (86) |
| NEA | 18604 | Japanese    | Japan       | 35.7 | 139.8 | Yes | Yes | Yes | No  | No  | Yes | (87) |
| NEA | 371   | Japanese    | Japan       | 36.0 | 137.0 | Yes | Yes | Yes | No  | No  | Yes | (88) |
| NEA | 560   | Japanese    | Japan       | 35.7 | 139.7 | No  | No  | Yes | No  | No  | No  | (89) |
| NEA | 525   | Japanese    | Japan       | 33.6 | 130.4 | No  | No  | No  | Yes | Yes | Yes | (90) |
| NEA | 71    | Japanese    | Japan       | 43.1 | 141.4 | No  | No  | No  | No  | No  | Yes | (91) |
| NEA | 195   | Japanese    | Japan       | 34.7 | 135.5 | No  | No  | No  | No  | No  | Yes | (13) |
| NEA | 32    | Japanese    | Japan       | 35.0 | 134.9 | No  | No  | No  | Yes | Yes | Yes | (39) |
| NEA | 165   | Japanese    | Japan       | 34.8 | 135.7 | No  | No  | No  | No  | No  | Yes | (92) |
| NEA | 525   | Japanese    | Japan       | 33.6 | 130.4 | No  | No  | No  | No  | No  | Yes | (93) |
| NEA | 129   | Japanese    | Japan       | 34.7 | 135.5 | No  | No  | No  | No  | No  | Yes | (94) |
| NEA | 62    | Japanese    | Japan       | 35.7 | 139.8 | No  | No  | No  | No  | No  | Yes | (95) |
| NEA | 125   | Japanese    | Japan       | 33.9 | 130.4 | No  | No  | No  | No  | No  | Yes | (96) |
| NEA | 1018  | Japanese    | Japan       | 35.7 | 139.8 | Yes | Yes | Yes | No  | No  | Yes | (97) |
| NEA | 201   | Korean      | China       | 45.8 | 126.6 | No  | No  | No  | No  | No  | Yes | (13) |
| NEA | 4128  | Korean      | South Korea | 37.5 | 127.0 | Yes | Yes | No  | No  | No  | Yes | (98) |
| NEA | 485   | Korean      | South Korea | 37.6 | 127.0 | Yes | Yes | Yes | No  | No  | Yes | (99) |

|     |     |                   |             |      |       |     |     |     |     |     |     |       |
|-----|-----|-------------------|-------------|------|-------|-----|-----|-----|-----|-----|-----|-------|
| NEA | 207 | Korean            | South Korea | 37.6 | 127.0 | No  | No  | No  | Yes | Yes | Yes | (100) |
| NEA | 211 | Korean            | South Korea | 37.6 | 127.0 | No  | No  | No  | No  | No  | Yes | (101) |
| NEA | 485 | Korean            | South Korea | 37.5 | 127.0 | Yes | Yes | Yes | No  | No  | No  | (13)  |
| NEA | 800 | Korean            | South Korea | 37.5 | 127.0 | No  | No  | No  | No  | No  | Yes | (102) |
| NEA | 324 | Korean            | South Korea | 37.0 | 126.0 | No  | No  | No  | Yes | Yes | No  | (39)  |
| NEA | 207 | Korean            | South Korea | 37.0 | 126.0 | No  | No  | No  | Yes | Yes | Yes | (103) |
| NEA | 149 | Korean            | South Korea | 36.8 | 129.3 | No  | No  | No  | No  | No  | Yes | (104) |
| NEA | 105 | Ryukyuan          | Japan       | 26.5 | 128.0 | Yes | Yes | Yes | No  | No  | No  | (6)   |
| NEA | 197 | Ryukyuan          | Japan       | 26.5 | 128.0 | No  | No  | No  | No  | No  | Yes | (105) |
| NEA | 143 | Ryukyuan          | Japan       | 26.1 | 127.1 | Yes | No  | No  | No  | No  | No  | (40)  |
| NEA | 141 | Mongolian Buryat  | Mongolia    | 47.1 | 118.1 | Yes | No  | No  | No  | No  | No  | (6)   |
| NEA | 140 | Mongolian Buryat  | Russia      | 52.5 | 103.9 | Yes | No  | No  | No  | No  | No  | (6)   |
| NEA | 25  | Mongolian Buryat  | Russia      | 54.9 | 99.0  | No  | No  | No  | Yes | Yes | Yes | (106) |
| NEA | 100 | Mongolian Khalkha | Mongolia    | 47.0 | 108.0 | No  | No  | No  | No  | No  | Yes | (107) |
| NEA | 202 | Mongolian Khalkha | Mongolia    | 47.9 | 106.9 | No  | No  | No  | No  | No  | Yes | (13)  |
| NEA | 41  | Mongolian Khalkha | Mongolia    | 47.9 | 106.9 | No  | No  | No  | Yes | Yes | No  | (108) |
| NEA | 52  | Mongolian Oold    | Mongolia    | 47.0 | 95.0  | No  | No  | No  | No  | No  | Yes | (107) |
| NEA | 144 | Mongolian Tsaatan | Mongolia    | 51.0 | 101.0 | No  | No  | No  | No  | No  | Yes | (107) |
| NEA | 102 | Mongolian         | China       | 40.8 | 111.6 | Yes | Yes | Yes | No  | No  | No  | (109) |
| NEA | 41  | Mongolian         | Mongolia    | 47.9 | 106.9 | No  | No  | No  | Yes | Yes | No  | (108) |
| NEA | 203 | Mongolian         | Mongolia    | 47.5 | 106.5 | No  | No  | No  | No  | No  | Yes | (13)  |
| NEA | 117 | Tu                | China       | 36.8 | 101.9 | Yes | Yes | Yes | No  | No  | Yes | (110) |
| NEA | 94  | Ewenki            | China       | 49.3 | 119.4 | No  | No  | No  | No  | No  | Yes | (111) |

|     |     |                   |            |      |        |     |     |     |     |     |     |       |
|-----|-----|-------------------|------------|------|--------|-----|-----|-----|-----|-----|-----|-------|
| NEA | 25  | Ewenki            | Russia     | 48.5 | 135.1  | No  | No  | No  | Yes | Yes | Yes | (106) |
| NEA | 35  | Ewenki            | Russia     | 60.0 | 98.0   | No  | No  | No  | No  | No  | Yes | (112) |
| NEA | 47  | Manchu            | China      | 45.8 | 126.7  | No  | No  | No  | Yes | Yes | No  | (113) |
| NEA | 172 | Manchu            | China      | 45.8 | 126.6  | No  | No  | No  | No  | No  | Yes | (13)  |
| NEA | 172 | Manchu            | China      | 45.2 | 126.1  | No  | No  | No  | No  | No  | Yes | (13)  |
| NEA | 35  | Negidal           | Russia     | 51.0 | 131.1  | No  | No  | No  | No  | No  | Yes | (106) |
| NEA | 25  | Udegey            | Russia     | 43.1 | 131.9  | No  | No  | No  | No  | No  | Yes | (112) |
| NEA | 73  | Ulchi             | Russia     | 51.9 | 140.4  | No  | No  | No  | Yes | Yes | Yes | (106) |
| NEA | 42  | Kazakh            | China      | 43.8 | 87.6   | No  | No  | No  | Yes | Yes | No  | (114) |
| NEA | 41  | Kazakh            | China      | 43.9 | 87.7   | No  | No  | No  | Yes | Yes | No  | (115) |
| NEA | 39  | Kazakh            | Kazakhstan | 48.0 | 68.0   | No  | No  | No  | Yes | Yes | No  | (13)  |
| NEA | 43  | Tofalar           | Russia     | 52.3 | 104.3  | No  | No  | No  | Yes | Yes | Yes | (106) |
| NEA | 22  | Tuvinian<br>Todja | Russia     | 51.5 | 95.1   | No  | No  | No  | Yes | Yes | Yes | (106) |
| NEA | 190 | Tuvinian          | Russia     | 51.7 | 94.4   | No  | No  | No  | Yes | Yes | Yes | (116) |
| NEA | 44  | Tuvinian          | Russia     | 51.5 | 95.1   | No  | No  | No  | Yes | Yes | Yes | (106) |
| NEA | 169 | Tuvinian          | Russia     | 51.5 | 95.1   | Yes | Yes | Yes | No  | No  | Yes | (117) |
| NEA | 174 | Tuvinian          | Russia     | 51.5 | 95.1   | Yes | Yes | Yes | No  | No  | No  | (6)   |
| NEA | 57  | Uyghur            | China      | 43.8 | 87.6   | No  | No  | No  | No  | No  | Yes | (118) |
| NEA | 54  | Uyghur            | China      | 43.8 | 87.7   | No  | No  | No  | Yes | Yes | No  | (115) |
| NEA | 92  | Uyghur            | China      | 41.7 | 83.0   | No  | No  | No  | Yes | Yes | Yes | (119) |
| NEA | 105 | Uyghur            | China      | 43.9 | 81.3   | Yes | Yes | No  | No  | No  | Yes | (120) |
| NEA | 102 | Yugur             | China      | 38.8 | 99.6   | Yes | Yes | Yes | No  | No  | Yes | (110) |
| NEA | 59  | Chukchi           | Russia     | 66.0 | -172.0 | No  | No  | No  | No  | No  | Yes | (112) |
| NEA | 92  | Koryak            | Russia     | 60.3 | 165.8  | No  | No  | No  | No  | No  | Yes | (112) |
| NEA | 85  | Aleut             | Russia     | 55.0 | 166.3  | Yes | Yes | Yes | No  | No  | Yes | (121) |
| NEA | 80  | Eskimo            | Russia     | 66.0 | -172.0 | No  | No  | No  | No  | No  | Yes | (112) |
| NEA | 70  | Eskimo            | Russia     | 66.0 | -172.0 | No  | No  | No  | No  | No  | Yes | (122) |
| NEA | 50  | Ainu              | Japan      | 42.2 | 142.8  | No  | No  | No  | No  | No  | Yes | (123) |

|     |      |         |        |      |       |     |     |     |     |     |     |       |
|-----|------|---------|--------|------|-------|-----|-----|-----|-----|-----|-----|-------|
| NEA | 50   | Ainu    | Japan  | 42.2 | 142.8 | Yes | Yes | No  | No  | No  | No  | (124) |
| NEA | 17   | Ket     | Russia | 59.2 | 88.6  | No  | No  | No  | Yes | Yes | Yes | (125) |
| NEA | 22   | Ket     | Russia | 60.0 | 93.1  | No  | No  | No  | No  | No  | Yes | (112) |
| NEA | 32   | Nivkhi  | Russia | 51.0 | 143.0 | No  | No  | No  | No  | No  | Yes | (112) |
| NEA | 53   | Nivkhi  | Russia | 51.0 | 143.0 | No  | No  | No  | No  | No  | Yes | (126) |
| NEA | 273  | Han     | China  | 31.9 | 117.3 | No  | No  | No  | Yes | Yes | No  | (127) |
| NEA | 618  | Han     | China  | 37.9 | 116.4 | Yes | Yes | No  | No  | No  | No  | (128) |
| NEA | 217  | Han     | China  | 39.9 | 116.4 | No  | No  | No  | No  | No  | Yes | (129) |
| NEA | 67   | Han     | China  | 39.9 | 116.4 | Yes | No  | No  | No  | No  | No  | (130) |
| NEA | 67   | Han     | China  | 37.0 | 113.0 | No  | No  | Yes | No  | No  | No  | (40)  |
| NEA | 112  | Han     | China  | 39.7 | 115.9 | No  | No  | No  | Yes | Yes | No  | (131) |
| NEA | 3874 | Han     | China  | 34.8 | 113.6 | Yes | Yes | No  | No  | No  | Yes | (132) |
| NEA | 1013 | Han     | China  | 30.6 | 114.5 | No  | No  | No  | No  | No  | Yes | (133) |
| NEA | 3238 | Han     | China  | 32.9 | 119.8 | Yes | Yes | No  | No  | No  | Yes | (134) |
| NEA | 334  | Han     | China  | 32.9 | 119.8 | Yes | Yes | No  | No  | No  | Yes | (135) |
| NEA | 1036 | Han     | China  | 35.1 | 109.7 | Yes | Yes | No  | No  | No  | Yes | (136) |
| NEA | 865  | Han     | China  | 36.6 | 117.0 | Yes | Yes | No  | No  | No  | Yes | (137) |
| NEA | 150  | Han     | China  | 36.6 | 117.0 | No  | No  | Yes | No  | No  | No  | (138) |
| NEA | 106  | Han     | China  | 41.8 | 123.4 | Yes | Yes | Yes | No  | No  | No  | (139) |
| NEA | 94   | Han     | China  | 41.8 | 123.4 | No  | No  | No  | Yes | Yes | Yes | (140) |
| NEA | 70   | Han     | China  | 39.1 | 117.2 | No  | No  | Yes | No  | No  | No  | (141) |
| NEA | 129  | Han     | China  | 25.1 | 102.7 | No  | No  | No  | No  | No  | Yes | (142) |
| NEA | 58   | Lachung | India  | 28.0 | 88.7  | No  | No  | No  | Yes | Yes | Yes | (79)  |
| NEA | 47   | Monba   | China  | 29.2 | 95.3  | Yes | Yes | No  | No  | No  | Yes | (143) |
| NEA | 96   | Tibetan | China  | 29.7 | 91.1  | No  | No  | No  | Yes | Yes | No  | (131) |
| NEA | 49   | Tibetan | China  | 36.6 | 101.8 | No  | No  | No  | Yes | Yes | No  | (144) |
| NEA | 158  | Tibetan | China  | 29.7 | 91.1  | Yes | Yes | Yes | No  | No  | No  | (145) |
| NEA | 190  | Tujia   | China  | 30.2 | 110.6 | Yes | Yes | No  | No  | No  | No  | (146) |
| NEA | 68   | Mansi   | Russia | 61.0 | 69.0  | No  | No  | No  | Yes | Yes | Yes | (106) |

|     |     |          |          |      |       |     |     |     |     |     |     |                        |
|-----|-----|----------|----------|------|-------|-----|-----|-----|-----|-----|-----|------------------------|
| NEA | 24  | Nganasan | Russia   | 69.4 | 86.2  | No  | No  | No  | Yes | Yes | Yes | (125)                  |
| SEA | 116 | Bulang   | China    | 21.9 | 100.5 | Yes | Yes | Yes | No  | No  | Yes | (147)                  |
| SEA | 49  | Khmer    | Cambodia | 11.0 | 98.0  | No  | No  | No  | Yes | Yes | Yes | (148)                  |
| SEA | 137 | Kinh     | China    | 21.7 | 108.3 | No  | No  | No  | No  | No  | Yes | (149)                  |
| SEA | 170 | Kinh     | Vietnam  | 21.0 | 105.9 | Yes | Yes | Yes | No  | No  | Yes | (150)                  |
| SEA | 137 | Kinh     | Vietnam  | 21.1 | 106.0 | No  | Yes | No  | No  | No  | No  | Personal communication |
| SEA | 140 | Kinh     | Vietnam  | 21.1 | 106.0 | Yes | No  | No  | No  | No  | Yes | Personal communication |
| SEA | 103 | Kinh     | Vietnam  | 21.0 | 105.8 | No  | No  | No  | No  | No  | Yes | (151)                  |
| SEA | 107 | Muong    | Vietnam  | 20.5 | 105.0 | Yes | Yes | No  | No  | No  | No  | Personal communication |
| SEA | 83  | Muong    | Vietnam  | 20.8 | 105.3 | No  | No  | No  | No  | No  | Yes | (6)                    |
| SEA | 119 | Wa       | China    | 23.0 | 99.3  | Yes | Yes | No  | No  | No  | Yes | (152)                  |
| SEA | 115 | Wa       | China    | 23.0 | 99.3  | No  | No  | Yes | No  | No  | No  | (153)                  |
| SEA | 85  | Miao     | China    | 26.6 | 107.2 | Yes | Yes | Yes | No  | No  | No  | (154)                  |
| SEA | 79  | Miao     | China    | 26.6 | 107.2 | No  | No  | No  | No  | No  | Yes | (155)                  |
| SEA | 57  | Yao      | China    | 22.7 | 103.2 | No  | No  | No  | No  | No  | Yes | (155)                  |
| SEA | 101 | Han      | China    | 24.0 | 105.0 | Yes | Yes | Yes | No  | No  | Yes | (156)                  |
| SEA | 281 | Han      | China    | 23.6 | 113.0 | No  | No  | Yes | No  | No  | No  | (6)                    |
| SEA | 102 | Han      | China    | 23.2 | 113.2 | No  | No  | No  | Yes | Yes | Yes | (157)                  |
| SEA | 144 | Han      | China    | 23.7 | 113.0 | Yes | Yes | Yes | No  | No  | Yes | (158)                  |
| SEA | 281 | Han      | China    | 23.2 | 113.3 | Yes | Yes | No  | No  | No  | No  | (6)                    |
| SEA | 102 | Han      | China    | 23.1 | 113.2 | Yes | Yes | Yes | No  | No  | No  | (13)                   |
| SEA | 264 | Han      | China    | 23.1 | 113.2 | Yes | Yes | Yes | Yes | Yes | Yes | (159)                  |
| SEA | 569 | Han      | China    | 22.3 | 114.2 | No  | Yes | No  | No  | No  | No  | (39)                   |
| SEA | 572 | Han      | China    | 22.2 | 114.0 | Yes | Yes | No  | No  | No  | No  | (6)                    |
| SEA | 55  | Han      | China    | 24.8 | 121.0 | Yes | Yes | Yes | No  | No  | Yes | Personal communication |

|     |      |         |          |      |       |     |     |     |     |     |     |                        |
|-----|------|---------|----------|------|-------|-----|-----|-----|-----|-----|-----|------------------------|
| SEA | 63   | Han     | China    | 28.3 | 113.0 | No  | No  | No  | Yes | Yes | No  | (160)                  |
| SEA | 99   | Han     | China    | 24.6 | 116.1 | Yes | Yes | Yes | No  | No  | No  | (161)                  |
| SEA | 89   | Han     | China    | 31.2 | 121.4 | No  | No  | No  | Yes | Yes | No  | (162)                  |
| SEA | 102  | Han     | China    | 25.1 | 121.6 | Yes | Yes | Yes | No  | No  | Yes | Personal communication |
| SEA | 1381 | Han     | China    | 29.4 | 113.1 | No  | No  | No  | No  | No  | Yes | (163)                  |
| SEA | 2504 | Han     | China    | 28.3 | 113.0 | No  | No  | Yes | No  | No  | No  | (164)                  |
| SEA | 1100 | Han     | China    | 29.0 | 121.0 | Yes | Yes | No  | No  | No  | Yes | (165)                  |
| SEA | 8333 | Han     | China    | 29.0 | 121.0 | Yes | Yes | No  | No  | No  | Yes | (166)                  |
| SEA | 128  | Bai     | China    | 26.5 | 99.9  | No  | No  | No  | No  | No  | Yes | (167)                  |
| SEA | 70   | Bai     | China    | 25.1 | 102.8 | No  | No  | No  | No  | No  | Yes | (168)                  |
| SEA | 70   | Drung   | China    | 24.5 | 101.5 | No  | No  | No  | No  | No  | Yes | (6)                    |
| SEA | 150  | Hani    | China    | 21.8 | 100.9 | Yes | Yes | Yes | No  | No  | Yes | (147)                  |
| SEA | 109  | Jinuo   | China    | 22.0 | 100.8 | Yes | Yes | No  | No  | No  | Yes | (152)                  |
| SEA | 99   | Jinuo   | China    | 22.0 | 100.8 | No  | No  | Yes | No  | No  | No  | (153)                  |
| SEA | 55   | Lahu    | China    | 22.5 | 99.9  | No  | No  | No  | No  | No  | Yes | (169)                  |
| SEA | 70   | Lahu    | China    | 24.5 | 101.5 | No  | No  | No  | No  | No  | Yes | (6)                    |
| SEA | 111  | Lisu    | China    | 26.0 | 98.8  | Yes | Yes | Yes | No  | No  | Yes | (170)                  |
| SEA | 94   | Naxi    | China    | 26.9 | 100.2 | No  | No  | No  | No  | No  | Yes | (171)                  |
| SEA | 118  | Naxi    | China    | 26.9 | 100.2 | No  | No  | No  | No  | No  | Yes | (172)                  |
| SEA | 107  | Nu      | China    | 26.0 | 98.9  | Yes | Yes | Yes | No  | No  | Yes | (170)                  |
| SEA | 67   | Buyi    | China    | 26.0 | 106.0 | No  | No  | No  | Yes | Yes | Yes | (173)                  |
| SEA | 109  | Buyi    | China    | 25.4 | 107.9 | Yes | Yes | Yes | No  | No  | No  | (154)                  |
| SEA | 96   | Dai Lue | Thailand | 13.8 | 100.5 | No  | No  | No  | Yes | Yes | Yes | (174)                  |
| SEA | 73   | Dai     | China    | 22.0 | 100.5 | No  | No  | No  | Yes | Yes | Yes | (175)                  |
| SEA | 124  | Dai     | China    | 22.0 | 100.8 | Yes | Yes | Yes | No  | No  | Yes | (147)                  |
| SEA | 96   | Dai     | Thailand | 18.0 | 99.0  | No  | No  | No  | No  | No  | Yes | (174)                  |
| SEA | 94   | Li      | China    | 19.2 | 109.4 | No  | No  | No  | Yes | Yes | No  | (176)                  |
| SEA | 108  | Maonan  | China    | 24.8 | 108.2 | Yes | Yes | No  | No  | No  | Yes | (177)                  |

|     |     |                |              |       |        |     |     |     |     |     |     |       |
|-----|-----|----------------|--------------|-------|--------|-----|-----|-----|-----|-----|-----|-------|
| SEA | 85  | Maonan         | China        | 24.8  | 108.2  | No  | No  | Yes | No  | No  | No  | (153) |
| SEA | 153 | Shui           | China        | 25.4  | 107.8  | Yes | Yes | Yes | No  | No  | No  | (154) |
| SEA | 140 | Thai           | Thailand     | 13.8  | 100.5  | No  | No  | No  | No  | No  | Yes | (174) |
| SEA | 49  | Thai           | Thailand     | 13.8  | 100.5  | No  | Yes | No  | No  | No  | No  | (178) |
| SEA | 97  | Thai           | Thailand     | 16.5  | 99.5   | No  | No  | No  | Yes | Yes | No  | (179) |
| SEA | 99  | Thai           | Thailand     | 13.8  | 100.5  | Yes | Yes | No  | No  | No  | No  | (6)   |
| SEA | 142 | Thai           | Thailand     | 14.0  | 98.0   | No  | No  | Yes | Yes | Yes | Yes | (39)  |
| SEA | 105 | Thai           | Thailand     | 15.2  | 104.9  | No  | No  | No  | Yes | Yes | Yes | (180) |
| SEA | 143 | Zhuang         | China        | 24.5  | 107.4  | No  | No  | No  | Yes | Yes | No  | (181) |
| SEA | 140 | Zhuang         | China        | 22.8  | 108.3  | No  | No  | No  | Yes | Yes | No  | (182) |
| SEA | 104 | Zhuang         | China        | 23.1  | 107.1  | Yes | Yes | Yes | No  | No  | Yes | (183) |
| OCE | 78  | Rarotonga      | Cook Islands | -21.2 | -159.8 | No  | No  | No  | Yes | Yes | No  | (184) |
| OCE | 50  | Cook Islands   | Cook Islands | -21.2 | -159.8 | No  | No  | No  | No  | No  | Yes | (185) |
| OCE | 48  | Dusun          | Malaysia     | 5.2   | 117.0  | No  | No  | No  | No  | No  | Yes | (186) |
| OCE | 57  | East-Timorese  | East Timor   | -9.0  | 125.0  | Yes | No  | No  | Yes | Yes | Yes | (6)   |
| OCE | 57  | Fiji           | Fiji         | -17.8 | 178.0  | No  | No  | No  | Yes | Yes | Yes | (184) |
| OCE | 94  | Filipino       | Philippines  | 14.6  | 121.0  | Yes | Yes | Yes | No  | No  | Yes | (6)   |
| OCE | 34  | Filipino       | Philippines  | 14.6  | 121.0  | No  | No  | No  | No  | No  | Yes | (187) |
| OCE | 62  | Javanese       | Indonesia    | -7.8  | 110.4  | No  | No  | No  | Yes | Yes | No  | (184) |
| OCE | 36  | Javanese       | Indonesia    | -6.1  | 106.2  | Yes | Yes | No  | No  | No  | Yes | (188) |
| OCE | 49  | Indonesia Nusa | Indonesia    | -10.2 | 123.6  | No  | No  | No  | No  | No  | Yes | (187) |
| OCE | 236 | Indonesian     | Indonesia    | -7.5  | 111.2  | Yes | Yes | No  | No  | No  | Yes | (189) |
| OCE | 25  | Indonesian     | Indonesia    | -2.0  | 127.0  | Yes | No  | No  | Yes | Yes | Yes | (6)   |
| OCE | 24  | Indonesian     | Indonesia    | -2.0  | 128.0  | No  | No  | No  | No  | No  | Yes | (187) |
| OCE | 201 | Indonesian     | Indonesia    | -6.1  | 106.2  | Yes | Yes | No  | No  | No  | Yes | (188) |
| OCE | 49  | Indonesian     | Indonesia    | -3.0  | 120.0  | Yes | Yes | Yes | No  | No  | No  | (6)   |

|     |     |                               |                  |       |        |     |     |     |     |     |     |       |
|-----|-----|-------------------------------|------------------|-------|--------|-----|-----|-----|-----|-----|-----|-------|
| OCE | 50  | Ivatan                        | Philippines      | 20.4  | 121.9  | Yes | Yes | Yes | No  | No  | Yes | (6)   |
| OCE | 62  | Kiribati                      | Kiribati         | -1.5  | 173.0  | No  | No  | No  | Yes | Yes | No  | (184) |
| OCE | 101 | Malay                         | Malaysia         | 3.0   | 103.0  | Yes | Yes | Yes | No  | No  | Yes | (6)   |
| OCE | 74  | Malay                         | Malaysia         | 3.1   | 101.7  | No  | No  | No  | No  | No  | Yes | (187) |
| OCE | 25  | Jehai                         | Malaysia         | 5.4   | 101.1  | No  | Yes | No  | No  | No  | Yes | (190) |
| OCE | 57  | Kadazan                       | Malaysia         | 5.2   | 117.0  | No  | No  | No  | No  | No  | Yes | (191) |
| OCE | 25  | Kensiu                        | Malaysia         | 5.7   | 100.9  | Yes | Yes | No  | No  | No  | Yes | (190) |
| OCE | 25  | Sarawak<br>Bau Bidayuh        | Malaysia         | 1.4   | 110.2  | Yes | Yes | No  | No  | No  | Yes | (190) |
| OCE | 50  | Sarawak<br>Bidayuh            | Malaysia         | 1.4   | 110.2  | No  | No  | No  | No  | No  | Yes | (191) |
| OCE | 51  | Sarawak<br>Iban               | Malaysia         | 2.3   | 111.8  | No  | No  | No  | No  | No  | Yes | (191) |
| OCE | 25  | Temuan                        | Malaysia         | 2.9   | 102.1  | Yes | Yes | No  | No  | No  | Yes | (190) |
| OCE | 200 | Maori                         | New<br>Zealand   | -41.3 | 174.8  | No  | No  | No  | No  | No  | Yes | (192) |
| OCE | 67  | Nauru                         | Nauru            | -1.0  | 166.0  | No  | No  | No  | Yes | Yes | No  | (184) |
| OCE | 42  | New<br>Caledonia              | New<br>Caledonia | -21.0 | 165.0  | Yes | Yes | Yes | Yes | Yes | Yes | (193) |
| OCE | 70  | Niue                          | Niue             | -19.1 | -169.9 | No  | No  | No  | Yes | Yes | No  | (184) |
| OCE | 51  | Samoan and<br>Tokelau         | Western<br>Samoa | -9.2  | -171.8 | No  | No  | No  | Yes | Yes | No  | (184) |
| OCE | 51  | Samoan                        | East Samoa       | -14.3 | -170.7 | Yes | Yes | Yes | No  | No  | No  | (6)   |
| OCE | 50  | Samoan                        | Samoa            | 14.2  | -171.0 | Yes | Yes | Yes | No  | No  | No  | (6)   |
| OCE | 29  | Samoan                        | Samoa            | -13.8 | -171.8 | No  | No  | No  | No  | No  | Yes | (187) |
| OCE | 50  | Samoan                        | Samoa            | -13.8 | -171.8 | No  | No  | No  | No  | No  | Yes | (185) |
| OCE | 98  | Taiwanese<br>Aborigine<br>Ami | China            | 23.4  | 121.5  | Yes | Yes | Yes | No  | No  | Yes | (6)   |
| OCE | 50  | Taiwanese<br>Aborigine<br>Ami | China            | 23.4  | 121.5  | No  | No  | No  | No  | No  | Yes | (6)   |



|     |     |                                  |       |      |       |     |     |     |    |    |     |     |
|-----|-----|----------------------------------|-------|------|-------|-----|-----|-----|----|----|-----|-----|
| OCE | 106 | Taiwanese<br>Aborigine<br>Atayal | China | 24.5 | 121.4 | Yes | Yes | Yes | No | No | Yes | (6) |
| OCE | 50  | Taiwanese<br>Aborigine<br>Atayal | China | 24.5 | 121.4 | No  | No  | No  | No | No | Yes | (6) |
| OCE | 101 | Taiwanese<br>Aborigine<br>Bunun  | China | 23.8 | 121.0 | Yes | Yes | Yes | No | No | Yes | (6) |
| OCE | 50  | Taiwanese<br>Aborigine<br>Bunun  | China | 23.8 | 121.0 | No  | No  | No  | No | No | Yes | (6) |
| OCE | 51  | Taiwanese<br>Aborigine<br>Paiwan | China | 22.5 | 120.8 | Yes | Yes | Yes | No | No | Yes | (6) |
| OCE | 50  | Taiwanese<br>Aborigine<br>Paiwan | China | 22.5 | 120.8 | No  | No  | No  | No | No | Yes | (6) |
| OCE | 55  | Taiwanese<br>Aborigine<br>Pazeh  | China | 24.0 | 120.4 | Yes | Yes | Yes | No | No | Yes | (6) |
| OCE | 50  | Taiwanese<br>Aborigine<br>Puyuma | China | 23.2 | 121.3 | Yes | Yes | Yes | No | No | Yes | (6) |
| OCE | 50  | Taiwanese<br>Aborigine<br>Puyuma | China | 23.2 | 121.3 | No  | No  | No  | No | No | Yes | (6) |
| OCE | 50  | Taiwanese<br>Aborigine<br>Rukai  | China | 22.8 | 120.9 | No  | No  | No  | No | No | Yes | (6) |
| OCE | 50  | Taiwanese<br>Aborigine<br>Rukai  | China | 22.8 | 120.9 | Yes | Yes | Yes | No | No | Yes | (6) |
| OCE | 51  | Taiwanese<br>Aborigine           | China | 24.6 | 121.0 | Yes | Yes | Yes | No | No | Yes | (6) |

|     |    |                                   |                     |       |        |     |     |     |    |    |     |       |
|-----|----|-----------------------------------|---------------------|-------|--------|-----|-----|-----|----|----|-----|-------|
|     |    | Saisiat                           |                     |       |        |     |     |     |    |    |     |       |
| OCE | 50 | Taiwanese<br>Aborigine<br>Saisiat | China               | 24.6  | 121.0  | No  | No  | No  | No | No | Yes | (6)   |
| OCE | 51 | Taiwanese<br>Aborigine<br>Siraya  | China               | 23.1  | 120.0  | Yes | Yes | Yes | No | No | Yes | (6)   |
| OCE | 55 | Taiwanese<br>Aborigine<br>Taroko  | China               | 24.2  | 121.6  | Yes | Yes | Yes | No | No | Yes | (6)   |
| OCE | 30 | Taiwanese<br>Aborigine<br>Thao    | China               | 23.9  | 120.9  | Yes | Yes | Yes | No | No | Yes | (6)   |
| OCE | 51 | Taiwanese<br>Aborigine<br>Tsou    | China               | 23.5  | 120.7  | Yes | Yes | Yes | No | No | Yes | (6)   |
| OCE | 50 | Taiwanese<br>Aborigine<br>Tsou    | China               | 23.5  | 120.7  | No  | No  | No  | No | No | Yes | (6)   |
| OCE | 50 | Taiwanese<br>Aborigine<br>Yami    | China               | 22.1  | 121.5  | No  | No  | No  | No | No | Yes | (6)   |
| OCE | 50 | Taiwanese<br>Aborigine<br>Yami    | China               | 22.1  | 121.5  | Yes | Yes | Yes | No | No | Yes | (6)   |
| OCE | 50 | Tokelau                           | Tokelau             | -9.2  | -171.8 | No  | No  | No  | No | No | Yes | (185) |
| OCE | 50 | Tonga                             | Tonga               | -21.1 | -175.2 | No  | No  | No  | No | No | Yes | (185) |
| OCE | 63 | Papuan<br>Abam                    | Papua New<br>Guinea | -8.9  | 143.2  | No  | No  | No  | No | No | Yes | (194) |
| OCE | 39 | Papuan<br>Abelam                  | Papua New<br>Guinea | -3.8  | 143.0  | Yes | Yes | Yes | No | No | No  | (193) |
| OCE | 59 | Papuan<br>Dorogori                | Papua New<br>Guinea | -8.9  | 143.2  | No  | No  | No  | No | No | Yes | (194) |
| OCE | 57 | Papuan                            | Papua New           | -6.1  | 145.4  | Yes | Yes | Yes | No | No | No  | (184) |

|     |    |                       |                  |       |       |     |     |     |     |     |     |       |
|-----|----|-----------------------|------------------|-------|-------|-----|-----|-----|-----|-----|-----|-------|
|     |    | Goroka Asaro          | Guinea           |       |       |     |     |     |     |     |     |       |
| OCE | 57 | Papuan Goroka Asaro   | Papua New Guinea | -6.1  | 145.4 | No  | No  | No  | Yes | Yes | Yes | (193) |
| OCE | 55 | Papuan Haruai         | Papua New Guinea | -5.1  | 144.2 | Yes | Yes | No  | No  | No  | No  | (193) |
| OCE | 75 | Papuan Highlander     | Papua New Guinea | -5.0  | 145.0 | Yes | Yes | No  | Yes | Yes | Yes | (6)   |
| OCE | 79 | Papuan Iamega         | Papua New Guinea | -8.9  | 143.2 | No  | No  | No  | No  | No  | Yes | (194) |
| OCE | 65 | Papuan Kapal          | Papua New Guinea | -8.9  | 143.2 | No  | No  | No  | No  | No  | Yes | (194) |
| OCE | 66 | Papuan Keapara        | Papua New Guinea | -10.1 | 147.8 | No  | Yes | Yes | No  | No  | No  | (193) |
| OCE | 46 | Papuan Kuru           | Papua New Guinea | -8.9  | 143.2 | No  | No  | No  | No  | No  | Yes | (194) |
| OCE | 48 | Papuan Lowlander      | Papua New Guinea | -10.0 | 147.0 | No  | No  | No  | Yes | Yes | No  | (6)   |
| OCE | 79 | Papuan Lowlander      | Papua New Guinea | -5.0  | 150.0 | Yes | No  | No  | No  | No  | Yes | (6)   |
| OCE | 80 | Papuan Pawaia         | Papua New Guinea | -7.2  | 145.3 | Yes | Yes | Yes | No  | No  | No  | (193) |
| OCE | 43 | Papuan Podare         | Papua New Guinea | -8.9  | 143.2 | No  | No  | No  | No  | No  | Yes | (194) |
| OCE | 26 | Papuan Roro           | Papua New Guinea | -8.6  | 146.4 | No  | No  | No  | No  | No  | Yes | (13)  |
| OCE | 50 | Papuan Rual           | Papua New Guinea | -8.9  | 143.2 | No  | No  | No  | No  | No  | Yes | (194) |
| OCE | 60 | Papuan Tolai (Rabaul) | Papua New Guinea | -4.2  | 152.2 | Yes | Yes | Yes | Yes | Yes | Yes | (193) |
| OCE | 90 | Papuan Ume            | Papua New Guinea | -8.9  | 143.2 | No  | No  | No  | No  | No  | Yes | (194) |
| OCE | 55 | Papuan                | Papua New        | -8.9  | 143.2 | No  | No  | No  | No  | No  | Yes | (194) |

|     |      |               |                  |       |        |     |     |     |     |     |     |       |
|-----|------|---------------|------------------|-------|--------|-----|-----|-----|-----|-----|-----|-------|
|     |      | Wipim         | Guinea           |       |        |     |     |     |     |     |     |       |
| OCE | 26   | Papuan Woigi  | Papua New Guinea | -8.9  | 143.2  | No  | No  | No  | No  | No  | Yes | (194) |
| OCE | 51   | Papuan Wonie  | Papua New Guinea | -8.9  | 143.2  | No  | No  | No  | No  | No  | Yes | (194) |
| OCE | 92   | Papuan Wosera | Papua New Guinea | -3.8  | 143.0  | No  | No  | No  | No  | No  | Yes | (187) |
| OCE | 34   | Papuan Wuroi  | Papua New Guinea | -8.9  | 143.2  | No  | No  | No  | No  | No  | Yes | (194) |
| OCE | 94   | Papuan        | Papua New Guinea | -6.2  | 143.3  | No  | No  | No  | No  | No  | Yes | (187) |
| OCE | 48   | Papuan        | Papua New Guinea | -9.5  | 147.1  | No  | No  | No  | No  | No  | Yes | (187) |
| AUS | 103  | Aborigine     | Australia        | -10.7 | 142.5  | Yes | Yes | Yes | Yes | Yes | Yes | (13)  |
| AUS | 75   | Aborigine     | Australia        | -14.0 | 136.6  | Yes | Yes | Yes | No  | No  | No  | (13)  |
| AUS | 41   | Aborigine     | Australia        | -15.8 | 128.7  | Yes | Yes | Yes | Yes | Yes | Yes | (13)  |
| AUS | 191  | Aborigine     | Australia        | -22.2 | 131.8  | Yes | Yes | Yes | No  | No  | Yes | (13)  |
| AUS | 100  | Aborigine     | Australia        | -13.0 | 143.0  | Yes | Yes | Yes | Yes | Yes | Yes | (6)   |
| AUS | 73   | Aborigine     | Australia        | -14.0 | 137.0  | Yes | Yes | Yes | No  | No  | No  | (6)   |
| AUS | 28   | Aborigine     | Australia        | -17.0 | 127.0  | Yes | Yes | Yes | Yes | Yes | Yes | (6)   |
| AUS | 190  | Aborigine     | Australia        | -24.0 | 132.0  | No  | No  | No  | No  | No  | Yes | (13)  |
| AUS | 191  | Aborigine     | Australia        | -24.0 | 132.0  | Yes | Yes | Yes | No  | No  | No  | (6)   |
| NAM | 62   | Athabaskan    | Canada           | 54.3  | -127.0 | No  | No  | No  | Yes | Yes | Yes | (195) |
| NAM | 1376 | Aleut         | USA              | 64.0  | -150.0 | Yes | Yes | Yes | No  | No  | Yes | (196) |
| NAM | 492  | Amerindian    | USA              | 32.7  | -114.5 | Yes | Yes | Yes | Yes | Yes | Yes | (197) |
| NAM | 100  | Pima          | USA              | 33.0  | -113.0 | Yes | Yes | No  | No  | No  | No  | (6)   |
| NAM | 26   | Penutian      | Canada           | 53.9  | -122.8 | No  | No  | No  | No  | No  | Yes | (195) |
| NAM | 40   | Canoncito     | USA              | 36.1  | -112.0 | No  | No  | No  | Yes | Yes | Yes | (6)   |
| NAM | 162  | Lacandon      | Mexico           | 16.7  | -91.0  | No  | No  | No  | Yes | Yes | Yes | (6)   |
| NAM | 163  | Mayan         | Mexico           | 16.8  | -91.1  | No  | No  | No  | Yes | Yes | Yes | (6)   |
| NAM | 89   | Mazatecan     | Mexico           | 18.0  | -97.0  | No  | No  | No  | No  | No  | Yes | (39)  |

|     |     |                     |           |       |        |     |     |     |     |     |     |       |
|-----|-----|---------------------|-----------|-------|--------|-----|-----|-----|-----|-----|-----|-------|
| NAM | 163 | Mexican             | Mexico    | 19.5  | -99.0  | No  | No  | No  | Yes | Yes | No  | (13)  |
| NAM | 204 | Mexican             | Mexico    | 19.4  | -99.0  | Yes | Yes | No  | Yes | Yes | Yes | (6)   |
| NAM | 103 | Mixteca-Alta        | Mexico    | 17.0  | -97.0  | No  | No  | No  | Yes | Yes | Yes | (13)  |
| NAM | 42  | Navajo              | USA       | 34.1  | -107.0 | Yes | Yes | Yes | Yes | Yes | Yes | (6)   |
| NAM | 187 | Native American     | USA       | 30.0  | -95.0  | Yes | Yes | Yes | No  | No  | No  | (39)  |
| NAM | 55  | Oaxaca Mixe         | Mexico    | 16.9  | -95.2  | Yes | Yes | Yes | Yes | Yes | Yes | (198) |
| NAM | 103 | Oaxaca Mixtec       | Mexico    | 17.2  | -97.5  | Yes | Yes | Yes | Yes | Yes | Yes | (198) |
| NAM | 86  | Pima                | Mexico    | 33.0  | -113.0 | Yes | Yes | No  | No  | No  | No  | (6)   |
| NAM | 83  | Seri                | Mexico    | 29.0  | -112.3 | No  | No  | No  | Yes | Yes | Yes | (13)  |
| NAM | 33  | Seri                | Mexico    | 29.0  | -112.0 | Yes | Yes | No  | Yes | Yes | No  | (6)   |
| NAM | 34  | Seri                | Mexico    | 28.9  | -112.6 | No  | Yes | No  | Yes | Yes | No  | (6)   |
| NAM | 95  | Sioux               | USA       | 43.6  | -97.0  | No  | No  | No  | Yes | Yes | Yes | (6)   |
| NAM | 190 | Sioux               | USA       | 44.5  | -100.0 | Yes | Yes | Yes | No  | No  | Yes | (199) |
| NAM | 101 | Sioux               | USA       | 45.0  | -100.0 | No  | No  | No  | Yes | Yes | Yes | (6)   |
| NAM | 44  | Tarahumara          | Mexico    | 27.5  | -107.8 | Yes | Yes | Yes | No  | No  | Yes | (200) |
| NAM | 78  | Zapotec             | Mexico    | 17.0  | -96.3  | No  | No  | No  | Yes | Yes | Yes | (13)  |
| NAM | 90  | Zapotec             | Mexico    | 16.6  | -96.7  | Yes | Yes | Yes | Yes | Yes | Yes | (198) |
| NAM | 50  | Zuni                | USA       | 35.0  | -107.0 | No  | No  | No  | Yes | Yes | Yes | (6)   |
| NAM | 51  | Zuni                | USA       | 35.1  | -108.2 | No  | No  | No  | Yes | Yes | Yes | (6)   |
| NAM | 149 | Yupik               | USA       | 60.0  | -160.0 | Yes | Yes | Yes | Yes | Yes | Yes | (6)   |
| NAM | 252 | Yupik               | USA       | 60.8  | -161.4 | Yes | No  | Yes | No  | No  | Yes | (201) |
| SAM | 87  | Ache                | Paraguay  | -23.5 | -55.8  | No  | No  | No  | Yes | Yes | Yes | (202) |
| SAM | 135 | Eastern Toba        | Argentina | -26.2 | -58.2  | No  | No  | No  | No  | No  | Yes | (203) |
| SAM | 135 | Eastern Toba        | Argentina | -26.2 | -58.2  | Yes | Yes | No  | No  | No  | No  | (204) |
| SAM | 19  | Western Toba Pilaga | Argentina | -27.4 | -59.0  | No  | No  | No  | No  | No  | Yes | (203) |

|     |     |                     |           |       |       |     |     |     |     |     |     |       |
|-----|-----|---------------------|-----------|-------|-------|-----|-----|-----|-----|-----|-----|-------|
| SAM | 19  | Western Toba Pilaga | Argentina | -27.4 | -59.0 | Yes | Yes | No  | No  | No  | No  | (204) |
| SAM | 48  | Mapuche             | Argentina | -39.0 | -68.2 | No  | No  | No  | Yes | Yes | No  | (39)  |
| SAM | 49  | Wichi               | Argentina | -27.4 | -59.0 | Yes | Yes | No  | No  | No  | Yes | (204) |
| SAM | 86  | Toba                | Argentina | -33.0 | -60.6 | No  | Yes | No  | No  | No  | Yes | (39)  |
| SAM | 18  | Arsario             | Colombia  | 11.2  | -74.2 | No  | No  | No  | No  | No  | Yes | (205) |
| SAM | 102 | Aymara              | Bolivia   | -16.0 | -68.0 | No  | No  | No  | No  | No  | Yes | (206) |
| SAM | 82  | Bari                | Venezuela | 9.8   | -73.0 | Yes | Yes | Yes | No  | No  | No  | (6)   |
| SAM | 50  | Ticuna              | Brazil    | -5.0  | -70.0 | No  | No  | No  | Yes | Yes | Yes | (6)   |
| SAM | 30  | Coreguaje           | Colombia  | 1.6   | -75.6 | No  | No  | No  | Yes | Yes | Yes | (207) |
| SAM | 34  | Ecuador Cayapa      | Ecuador   | 0.2   | -78.5 | No  | No  | No  | Yes | Yes | No  | (208) |
| SAM | 183 | Ecuador Cayapa      | Ecuador   | 1.1   | -79.2 | No  | No  | No  | No  | No  | Yes | (209) |
| SAM | 20  | Embera              | Colombia  | 2.4   | -76.6 | No  | No  | No  | Yes | Yes | Yes | (207) |
| SAM | 40  | Guarani-Mbya        | Brazil    | -25.1 | -56.3 | No  | Yes | No  | No  | No  | Yes | (18)  |
| SAM | 143 | Guarani             | Brazil    | -23.0 | -55.0 | Yes | Yes | Yes | No  | No  | Yes | (6)   |
| SAM | 32  | Guarani             | Brazil    | -25.2 | -52.4 | No  | No  | No  | Yes | Yes | Yes | (13)  |
| SAM | 52  | Guarani             | Brazil    | -24.0 | -55.0 | Yes | Yes | No  | No  | No  | Yes | (6)   |
| SAM | 30  | Ijka                | Colombia  | 10.9  | -73.7 | No  | No  | No  | Yes | Yes | Yes | (207) |
| SAM | 106 | Kaingang            | Brazil    | -24.5 | -51.5 | No  | No  | No  | Yes | Yes | Yes | (13)  |
| SAM | 235 | Kaingang            | Brazil    | -24.5 | -51.7 | No  | No  | No  | No  | No  | Yes | (202) |
| SAM | 31  | Kogi                | Colombia  | 10.9  | -73.7 | No  | No  | No  | Yes | Yes | Yes | (207) |
| SAM | 20  | Nukak               | Colombia  | 2.6   | -72.6 | No  | No  | No  | Yes | Yes | Yes | (207) |
| SAM | 17  | Lengua              | Paraguay  | -24.0 | -59.8 | No  | No  | No  | No  | No  | Yes | (210) |
| SAM | 105 | Uro                 | Peru      | -15.8 | -69.3 | Yes | Yes | No  | No  | No  | Yes | (211) |
| SAM | 27  | Sikuani             | Colombia  | 6.2   | -67.5 | No  | No  | No  | Yes | Yes | Yes | (207) |
| SAM | 60  | Terena              | Brazil    | -20.0 | -55.0 | Yes | Yes | Yes | No  | No  | Yes | (212) |
| SAM | 49  | Ticuna              | Brazil    | -5.0  | -70.0 | No  | No  | No  | Yes | Yes | Yes | (6)   |

|     |    |            |           |       |       |    |     |     |     |     |     |       |
|-----|----|------------|-----------|-------|-------|----|-----|-----|-----|-----|-----|-------|
| SAM | 29 | Tule       | Colombia  | 8.1   | -76.7 | No | No  | No  | Yes | Yes | No  | (207) |
| SAM | 26 | Venezuelan | Venezuela | 10.4  | -66.6 | No | No  | No  | No  | No  | Yes | (13)  |
| SAM | 30 | Waunana    | Colombia  | 3.4   | -76.5 | No | No  | No  | Yes | Yes | Yes | (207) |
| SAM | 24 | Wichi      | Argentina | -22.3 | -63.7 | No | No  | No  | No  | No  | Yes | (210) |
| SAM | 74 | Xavante    | Brazil    | -15.6 | -56.1 | No | No  | No  | No  | No  | Yes | (203) |
| SAM | 55 | Yanomamo   | Venezuela | 3.0   | -65.0 | No | No  | No  | Yes | Yes | Yes | (6)   |
| SAM | 73 | Yucpa      | Venezuela | 9.0   | -72.0 | No | Yes | Yes | Yes | Yes | Yes | (213) |
| SAM | 70 | Yukpa      | Colombia  | 10.0  | -73.0 | No | No  | No  | Yes | Yes | No  | (13)  |

Geographic regions: SAF: sub-Saharan Africa; NAF: North Africa; EUR: Europe; SWA: South-West Asia; NEA: North-East Asia; SEA: South-East Asia; OCE: Oceania; AUS: Australia; NAM: North America; SAM: South America.

## References

1. Ellis JM, Hoyer RJ, Costello CN, et al. HLA-B allele frequencies in Cote d'Ivoire defined by direct DNA sequencing: identification of HLA-B\*1405, B\*4410, and B\*5302. *Tissue Antigens*. 2001;**57**:339-43.
2. Renquin J, Sanchez-Mazas A, Halle L, et al. HLA class II polymorphism in Aka Pygmies and Bantu Congolese and a reassessment of HLA-DRB1 African diversity. *Tissue Antigens*. 2001;**58**:211-22.
3. Torimiro JN, Carr JK, Wolfe ND, et al. HLA class I diversity among rural rainforest inhabitants in Cameroon: identification of A\*2612-B\*4407 haplotype. *Tissue Antigens*. 2006;**67**:30-7.
4. Pimtanonthai N, Hurley CK, Leke R, Klitz W, Johnson AH. HLA-DR and -DQ polymorphism in Cameroon. *Tissue Antigens*. 2001;**58**:1-8.
5. Ellis JM, Mack SJ, Leke RF, Quakyi I, Johnson AH, Hurley CK. Diversity is demonstrated in class I HLA-A and HLA-B alleles in Cameroon, Africa: description of HLA-A\*03012, \*2612, \*3006 and HLA-B\*1403, \*4016, \*4703. *Tissue Antigens*. 2000;**56**:291-302.
6. Mack SJ, Tsai Y, Sanchez-Mazas A, Erlich HA. Anthropology & human genetic diversity population reports. *13th International Histocompatibility Workshop anthropology/human genetic diversity joint report*, 2006.
7. Cao K, Moormann AM, Lyke KE, et al. Differentiation between African populations is evidenced by the diversity of alleles and haplotypes of HLA class I

loci. *Tissue Antigens*. 2004;**63**:293-325.

8. Migot-Nabias F, Fajardy I, Danze PM, et al. HLA class II polymorphism in a Gabonese Banzabi population. *Tissue Antigens*. 1999;**53**:580-5.

9. Norman PJ, Hollenbach JA, Nemat-Gorgani N, et al. Co-evolution of human leukocyte antigen (HLA) class I ligands with killer-cell immunoglobulin-like receptors (KIR) in a genetically diverse population of sub-Saharan Africans. *PLoS Genet*. 2013;**9**:e1003938.

10. Spinola C, Bruges-Armas J, Brehm A, Spinola H. HLA-A polymorphisms in four ethnic groups from Guinea-Bissau (West Africa) inferred from sequence-based typing. *Tissue Antigens*. 2008;**72**:593-8.

11. Spinola H, Bruges-Armas J, Middleton D, Brehm A. HLA polymorphisms in Cabo Verde and Guine-Bissau inferred from sequence-based typing. *Hum Immunol*. 2005;**66**:1082-92.

12. Sanchez-Mazas A, Steiner QG, Grundschober C, Tiercy JM. The molecular determination of HLA-Cw alleles in the Mandenka (West Africa) reveals a close genetic relationship between Africans and Europeans. *Tissue Antigens*. 2000;**56**:303-12.

13. Charron D. Proceedings of the 12th International Histocompatibility Workshop and Conference. Paris: EDK, 1997.

14. Saldanha N, Spínolaa C, Santosb MR, et al. HLA polymorphisms in Forros and Angolares from São Tomé Island (West Africa): evidence for the population origin. *Journal of Genetic Genealogy*. 2009;**5**:76-85.

15. Paximadis M, Mathebula TY, Gentle NL, et al. Human leukocyte antigen class I (A, B, C) and II (DRB1) diversity in the black and Caucasian South African population. *Hum Immunol*. 2012;**73**:80-92.

16. Middleton D, Williams F, Meenagh A, et al. Analysis of the distribution of HLA-A alleles in populations from five continents. *Hum Immunol*. 2000;**61**:1048-52.

17. Kijak GH, Walsh AM, Koehler RN, et al. HLA class I allele and haplotype diversity in Ugandans supports the presence of a major east African genetic cluster. *Tissue Antigens*. 2009;**73**:262-9.

18. Nunes JM, Riccio ME, Buhler S, et al. Analysis of the HLA population data (AHPD) submitted to the 15th International Histocompatibility/Immunogenetics Workshop by using the Gene[rate] computer tools accommodating ambiguous data (AHPD project report). *Tissue Antigens*. 2010;**76**:18-30.

19. Canossi A, Piancatelli D, Aureli A, et al. Correlation between genetic HLA class I and II polymorphisms and anthropological aspects in the Chaouya population from Morocco (Arabic speaking). *Tissue Antigens*. 2010;**76**:177-93.

20. Izaabel H, Garchon HJ, Caillat-Zucman S, et al. HLA class II DNA polymorphism in a Moroccan population from the Souss, Agadir area. *Tissue Antigens*. 1998;**51**:106-10.

21. Hajjej A, Hajjej G, Almawi WY, Kaabi H, El-Gaaied A, Hmida S. HLA class I and class II polymorphism in a population from south-eastern Tunisia (Gabes



Area). *Int J Immunogenet.* 2011;**38**:191-9.

22. Abdennaji Guenounou B, Loueslati BY, Buhler S, et al. HLA class II genetic diversity in southern Tunisia and the Mediterranean area. *Int J Immunogenet.* 2006;**33**:93-103.

23. Hajjej A, Kaabi H, Sellami MH, et al. The contribution of HLA class I and II alleles and haplotypes to the investigation of the evolutionary history of Tunisians. *Tissue Antigens.* 2006;**68**:153-62.

24. Mahjoub S, Mehri S, Ghazouani E, et al. HLA class II polymorphisms in Tunisian patients with dilated cardiomyopathy. *Tissue Antigens.* 2010;**75**:679-83.

25. Ayed K, Ayed-Jendoubi S, Sfar I, Labonne MP, Gebuhrer L. HLA class-I and HLA class-II phenotypic, gene and haplotypic frequencies in Tunisians by using molecular typing data. *Tissue Antigens.* 2004;**64**:520-32.

26. Oumhani K, Canossi A, Piancatelli D, et al. Sequence-Based analysis of the HLA-DRB1 polymorphism in Metalsa Berber and Chaouya Arabic-speaking groups from Morocco. *Hum Immunol.* 2002;**63**:129-38.

27. Piancatelli D, Canossi A, Aureli A, et al. Human leukocyte antigen-A, -B, and -Cw polymorphism in a Berber population from North Morocco using sequence-based typing. *Tissue Antigens.* 2004;**63**:158-72.

28. Fort M, de Stefano GF, Cambon-Thomsen A, et al. HLA class II allele and haplotype frequencies in Ethiopian Amhara and Oromo populations. *Tissue Antigens.* 1998;**51**:327-36.

29. Middleton D, Marsh SG. 16th International HLA and Immunogenetics Workshop (IHIW) *Int J Immunogenet.* 2013;**40**.

30. Arnaiz-Villena A, Martinez-Laso J, Moscoso J, et al. HLA genes in the Chuvashian population from European Russia: admixture of Central European and Mediterranean populations. *Hum Biol.* 2003;**75**:375-92.

31. Sanchez-Velasco P, Gomez-Casado E, Martinez-Laso J, et al. HLA alleles in isolated populations from North Spain: origin of the Basques and the ancient Iberians. *Tissue Antigens.* 2003;**61**:384-92.

32. Ahmad T, Armuzzi A, Neville M, et al. The contribution of human leucocyte antigen complex genes to disease phenotype in ulcerative colitis. *Tissue Antigens.* 2003;**62**:527-35.

33. Doherty DG, Vaughan RW, Donaldson PT, Mowat AP. HLA DQA, DQB, and DRB genotyping by oligonucleotide analysis: distribution of alleles and haplotypes in British caucasoids. *Hum Immunol.* 1992;**34**:53-63.

34. Alfirevic A, Gonzalez-Galarza F, Bell C, et al. In silico analysis of HLA associations with drug-induced liver injury: use of a HLA-genotyped DNA archive from healthy volunteers. *Genome Med.* 2012;**4**:51.

35. Ivanova M, Rozemuller E, Tyufekchiev N, Michailova A, Tilanus M, Naumova E. HLA polymorphism in Bulgarians defined by high-resolution typing

methods in comparison with other populations. *Tissue Antigens*. 2002;**60**:496-504.

36. Grubic Z, Burek Kamenaric M, Mikulic M, Stingl Jankovic K, Maskalan M, Zunec R. HLA-A, HLA-B and HLA-DRB1 allele and haplotype diversity among volunteer bone marrow donors from Croatia. *Int J Immunogenet*. 2014;**41**:211-21.

37. Crnic-Martinovic M, Grahovac B, Jeras BV, et al. HLA class II polymorphism in autochthonous population of Gorski kotar, Croatia. *Coll Antropol*. 2007;**31**:853-8.

38. Martinovic I, Bakran M, Chaventre A, et al. Application of HLA class II polymorphism analysis to the study of the population structure of the Island of Krk, Croatia. *Hum Biol*. 1997;**69**:819-29.

39. Gonzalez-Galarza FF, McCabe A, Santos E, et al. Allele frequency net database (AFND) 2020 update: gold-standard data classification, open access genotype data and new query tools. *Nucleic Acids Res*. 2020;**48**:D783-D8.

40. Tsuji K, Aizawa M, Sasazuki T. HLA 1991: Proceedings of the Eleventh International Histocompatibility Workshop and Conference. Yokohama: Oxford University Press, 1992.

41. Reil A, Bein G, Machulla HK, Sternberg B, Seyfarth M. High-resolution DNA typing in immunoglobulin A deficiency confirms a positive association with DRB1\*0301, DQB1\*02 haplotypes. *Tissue Antigens*. 1997;**50**:501-6.

42. Schmidt AH, Baier D, Solloch UV, et al. Estimation of high-resolution HLA-A, -B, -C, -DRB1 allele and haplotype frequencies based on 8862 German stem cell donors and implications for strategic donor registry planning. *Hum Immunol*. 2009;**70**:895-902.

43. Papassavas EC, Spyropoulou-Vlachou M, Papassavas AC, Schipper RF, Doxiadis IN, Stavropoulos-Giokas C. MHC class I and class II phenotype, gene, and haplotype frequencies in Greeks using molecular typing data. *Hum Immunol*. 2000;**61**:615-23.

44. Pratsidou-Gertsi P, Kanakoudi-Tsakalidou F, Spyropoulou M, et al. Nationwide collaborative study of HLA class II associations with distinct types of juvenile chronic arthritis (JCA) in Greece. *Eur J Immunogenet*. 1999;**26**:299-310.

45. Middleton D, Williams F, Hamill MA, Meenagh A. Frequency of HLA-B alleles in a Caucasoid population determined by a two-stage PCR-SSOP typing strategy. *Hum Immunol*. 2000;**61**:1285-97.

46. Williams F, Meenagh A, Patterson C, Middleton D. Molecular diversity of the HLA-C gene identified in a caucasian population. *Hum Immunol*. 2002;**63**:602-13.

47. Williams F, Meenagh A, Single R, et al. High resolution HLA-DRB1 identification of a Caucasian population. *Hum Immunol*. 2004;**65**:66-77.

48. Rendine S, Ferrero NM, Sacchi N, Costa C, Pollichieni S, Amoroso A. Estimation of human leukocyte antigen class I and class II high-resolution allele and haplotype frequencies in the Italian population and comparison with other European populations. *Hum Immunol*. 2012;**73**:399-404.

49. Lulli P, Grammatico P, Brioli G, et al. HLA-DR and -DQ alleles in Italian patients with melanoma. *Tissue Antigens*. 1998;**51**:276-80.
50. Perri F, Piepoli A, Quitadamo M, Quarticelli M, Merla A, Bisceglia M. HLA-DQA1 and -DQB1 genes and Helicobacter pylori infection in Italian patients with gastric adenocarcinoma. *Tissue Antigens*. 2002;**59**:55-7.
51. Guerini FR, Fusco C, Mazzi B, et al. HLA-Cw allele frequencies in northern and southern Italy. *Transpl Immunol*. 2008;**18**:286-9.
52. Petlichkovski A, Efinska-Mladenovska O, Trajkov D, Arsov T, Strezova A, Spiroski M. High-resolution typing of HLA-DRB1 locus in the Macedonian population. *Tissue Antigens*. 2004;**64**:486-91.
53. Arnaiz-Villena A, Dimitroski K, Pacho A, et al. HLA genes in Macedonians and the sub-Saharan origin of the Greeks. *Tissue Antigens*. 2001;**57**:118-27.
54. Ronningen KS, Spurkland A, Markussen G, Iwe T, Vartdal F, Thorsby E. Distribution of HLA class II alleles among Norwegian Caucasians. *Hum Immunol*. 1990;**29**:275-81.
55. Nowak J, Mika-Witkowska R, Polak M, et al. Allele and extended haplotype polymorphism of HLA-A, -C, -B, -DRB1 and -DQB1 loci in Polish population and genetic affinities to other populations. *Tissue Antigens*. 2008;**71**:193-205.
56. Spinola H, Brehm A, Bettencourt B, Middleton D, Bruges-Armas J. HLA class I and II polymorphisms in Azores show different settlements in Oriental and Central islands. *Tissue Antigens*. 2005;**66**:217-30.
57. Spinola H, Brehm A, Williams F, Jesus J, Middleton D. Distribution of HLA alleles in Portugal and Cabo Verde. Relationships with the slave trade route. *Ann Hum Genet*. 2002;**66**:285-96.
58. Arnaiz-Villena A, Reguera R, Ferri A, et al. The peopling of Madeira Archipelago (Portugal) according to HLA genes. *Int J Immunogenet*. 2009;**36**:9-14.
59. Spinola H, Bruges-Armas J, Mora MG, Middleton D, Brehm A. HLA genes in Madeira Island (Portugal) inferred from sequence-based typing: footprints from different origins. *Mol Immunol*. 2006;**43**:1726-8.
60. Kapustin S, Lyshchov A, Alexandrova J, Imyanitov E, Blinov M. HLA class II molecular polymorphisms in healthy Slavic individuals from North-Western Russia. *Tissue Antigens*. 1999;**54**:517-20.
61. Petrone A, Battelino T, Krzisnik C, et al. Similar incidence of type 1 diabetes in two ethnically different populations (Italy and Slovenia) is sustained by similar HLA susceptible/protective haplotype frequencies. *Tissue Antigens*. 2002;**60**:244-53.
62. Vidal S, Morante MP, Moga E, et al. Molecular analysis of HLA-DRB1 polymorphism in north-east Spain. *Eur J Immunogenet*. 2002;**29**:75-7.
63. Muro M, Marin L, Torio A, et al. HLA polymorphism in the Murcia population (Spain): in the cradle of the archaeological Iberians. *Hum Immunol*. 2001;**62**:910-21.
64. Wennerstrom A, Pietinalho A, Vauhkonen H, et al. HLA-DRB1 allele frequencies and C4 copy number variation in Finnish sarcoidosis patients and

associations with disease prognosis. *Hum Immunol.* 2012;**73**:93-100.

65. Johansson A, Ingman M, Mack SJ, Erlich H, Gyllensten U. Genetic origin of the Swedish Sami inferred from HLA class I and class II allele frequencies. *Eur J Hum Genet.* 2008;**16**:1341-9.
66. Sanchez-Velasco P, Karadsheh NS, Garcia-Martin A, Ruiz de Alegria C, Leyva-Cobian F. Molecular analysis of HLA allelic frequencies and haplotypes in Jordanians and comparison with other related populations. *Hum Immunol.* 2001;**62**:901-9.
67. Samaha H. HLA class II allele frequencies in the Lebanese population. *Molecular Immunology.* 2003;**39**:1079-81.
68. Williams F, Meenagh A, Darke C, et al. Analysis of the distribution of HLA-B alleles in populations from five continents. *Hum Immunol.* 2001;**62**:645-50.
69. Al-Hussein KA, Rama NR, Butt AI, Meyer B, Rozemuller E, Tilanus MG. HLA class II sequence-based typing in normal Saudi individuals. *Tissue Antigens.* 2002;**60**:259-61.
70. Hajeer AH, Al Balwi MA, Aytul Uyar F, et al. HLA-A, -B, -C, -DRB1 and -DQB1 allele and haplotype frequencies in Saudis using next generation sequencing technique. *Tissue Antigens.* 2013;**82**:252-8.
71. Rey D, Amirzargar A, Areces C, et al. Gorgan (Turkmen in Iran) HLA genetics: transplantation, pharmacogenomics and anthropology. *Immunol Invest.* 2015;**44**:88-100.
72. Sanchez-Velasco P, Leyva-Cobian F. The HLA class I and class II allele frequencies studied at the DNA level in the Svanetian population (Upper Caucasus) and their relationships to Western European populations. *Tissue Antigens.* 2001;**58**:223-33.
73. Matevosyan L, Chattopadhyay S, Madelian V, et al. HLA-A, HLA-B, and HLA-DRB1 allele distribution in a large Armenian population sample. *Tissue Antigens.* 2011;**78**:21-30.
74. Farjadian S, Ghaderi A. HLA class II similarities in Iranian Kurds and Azeris. *International Journal of Immunogenetics.* 2007;**34**:457-63.
75. Mohyuddin A, Ayub Q, Khaliq S, et al. HLA polymorphism in six ethnic groups from Pakistan. *Tissue Antigens.* 2002;**59**:492-501.
76. Rani R, Marcos C, Lazaro AM, Zhang Y, Stastny P. Molecular diversity of HLA-A, -B and -C alleles in a North Indian population as determined by PCR-SSOP. *Int J Immunogenet.* 2007;**34**:201-8.
77. Shankarkumar U, Ghosh K, Gupte S, Mukherjee MB, Mohanty D. Distribution of HLA antigens in Bhils and Pawars of Dhadgaon, Maharashtra, India. *Journal of Human Ecology.* 1999;**10**:173-8.
78. Shankarkumar U, Pawar A, Ghosh K, Bajpai S, Pazare A. Human leucocyte antigen class II DRB1 and DQB1 associations in human immunodeficiency virus-infected patients of Mumbai, India. *Int J Immunogenet.* 2010;**37**:199-204.
79. Agrawal S, Srivastava SK, Borkar M, Chaudhuri TK. Genetic affinities of north and northeastern populations of India: inference from HLA-based study.

*Tissue Antigens*. 2008;**72**:120-30.

80. Agrawal S, Khan F, Bharadwaj U. Human genetic variation studies and HLA class II loci. *Int J Immunogenet*. 2007;**34**:247-52.
81. Shankarkumar U. HLA-A, -B and -Cw allele frequencies in a Nadar population from Tamil Nadu, India. *Human Immunology*. 2004;**65**:958.
82. Amirzargar AA, Mohseni N, Shokrgozar MA, et al. HLA-DRB1, DQA1 and DQB1 alleles and haplotypes frequencies in Iranian healthy adult responders and non-responders to recombinant hepatitis B vaccine. *Iran J Immunol*. 2008;**5**:92-9.
83. Sayad A, Akbari MT, Pajouhi M, Mostafavi F, Zamani M. The influence of the HLA-DRB, HLA-DQB and polymorphic positions of the HLA-DRbeta1 and HLA-DQbeta1 molecules on risk of Iranian type 1 diabetes mellitus patients. *Int J Immunogenet*. 2012;**39**:429-36.
84. Kollaee A, Ghaffarpor M, Ghlichnia HA, Ghaffari SH, Zamani M. The influence of the HLA-DRB1 and HLA-DQB1 allele heterogeneity on disease risk and severity in Iranian patients with multiple sclerosis. *Int J Immunogenet*. 2012;**39**:414-22.
85. Shankarkumar U, Sridharan B, Pitchappan RM. HLA diversity among Nadars, a primitive Dravidian caste of South India. *Tissue Antigens*. 2003;**62**:542-7.
86. Tokunaga K, Ishikawa Y, Ogawa A, et al. Sequence-based association analysis of HLA class I and II alleles in Japanese supports conservation of common haplotypes. *Immunogenetics*. 1997;**46**:199-205.
87. Ikeda N, Kojima H, Nishikawa M, et al. Determination of HLA-A, -C, -B, -DRB1 allele and haplotype frequency in Japanese population based on family study. *Tissue Antigens*. 2015;**85**:252-9.
88. Saito S, Ota S, Yamada E, Inoko H, Ota M. Allele frequencies and haplotypic associations defined by allelic DNA typing at HLA class I and class II loci in the Japanese population. *Tissue Antigens*. 2000;**56**:522-9.
89. Haida Y, Ikeda S, Takagi A, et al. Association analysis of the HLA-C gene in Japanese alopecia areata. *Immunogenetics*. 2013;**65**:553-7.
90. Yoshitake S, Kimura A, Okada M, Yao T, Sasazuki T. HLA class II alleles in Japanese patients with inflammatory bowel disease. *Tissue Antigens*. 1999;**53**:350-8.
91. Fukazawa T, Kikuchi S, Sasaki H, et al. Genomic HLA profiles of MS in Hokkaido, Japan: important role of DPB1\*0501 allele. *J Neurol*. 2000;**247**:175-8.
92. Kitawaki J, Obayashi H, Kado N, et al. Association of HLA class I and class II alleles with susceptibility to endometriosis. *Hum Immunol*. 2002;**63**:1033-8.
93. Tanaka T, Ohmori M, Yasunaga S, Ohshima K, Kikuchi M, Sasazuki T. DNA typing of HLA class II genes (HLA-DR, -DQ and -DP) in Japanese patients with histiocytic necrotizing lymphadenitis (Kikuchi's disease). *Tissue Antigens*. 1999;**54**:246-53.
94. Nomura S, Shouzu A, Omoto S, et al. Genetic analysis of HLA, NA and HPA typing in type 2 diabetes and ASO. *Int J Immunogenet*. 2006;**33**:117-22.
95. Horiki T, Ichikawa Y, Moriuchi J, et al. HLA class II haplotypes associated with pulmonary interstitial lesions of polymyositis/dermatomyositis in Japanese patients. *Tissue Antigens*. 2002;**59**:25-30.

96. Matsushita T, Matsuoka T, Isobe N, et al. Association of the HLA-DPB1\*0501 allele with anti-aquaporin-4 antibody positivity in Japanese patients with idiopathic central nervous system demyelinating disorders. *Tissue Antigens*. 2009;**73**:171-6.
97. Itoh Y, Mizuki N, Shimada T, et al. High-throughput DNA typing of HLA-A, -B, -C, and -DRB1 loci by a PCR-SSOP-Luminex method in the Japanese population. *Immunogenetics*. 2005;**57**:717-29.
98. Huh JY, Yi DY, Eo SH, Cho H, Park MH, Kang MS. HLA-A, -B and -DRB1 polymorphism in Koreans defined by sequence-based typing of 4128 cord blood units. *Int J Immunogenet*. 2013;**40**:515-23.
99. Lee KW, Oh DH, Lee C, Yang SY. Allelic and haplotypic diversity of HLA-A, -B, -C, -DRB1, and -DQB1 genes in the Korean population. *Tissue Antigens*. 2005;**65**:437-47.
100. Park MH. HLA-DPB1, -DQA1, -DQB1 and -DRB1 allele frequencies in a population from South Korea. *Human Immunology*. 2004;**65**:1083-4.
101. Hong SC, Lin L, Lo B, et al. DQB1\*0301 and DQB1\*0601 modulate narcolepsy susceptibility in Koreans. *Hum Immunol*. 2007;**68**:59-68.
102. Song EY, Park H, Roh EY, Park MH. HLA-DRB1 and -DRB3 allele frequencies and haplotypic associations in Koreans. *Hum Immunol*. 2004;**65**:270-6.
103. Song EY, Park MH, Kang SJ, et al. HLA class II allele and haplotype frequencies in Koreans based on 107 families. *Tissue Antigens*. 2002;**59**:475-86.
104. Yang JH, Sohn YH, Ko SY, Choi SE, Kim MH, Oh HB. Anthropological analysis of Koreans using HLA class II diversity among East Asians. *Tissue Antigens*. 2010;**76**:282-8.
105. Hatta Y, Ohashi J, Imanishi T, et al. HLA genes and haplotypes in Ryukyans suggest recent gene flow to the Okinawa Islands. *Hum Biol*. 1999;**71**:353-65.
106. Uinuk-ool TS, Takezaki N, Sukernik RI, Nagl S, Klein J. Origin and affinities of indigenous Siberian populations as revealed by HLA class II gene frequencies. *Hum Genet*. 2002;**110**:209-26.
107. Machulla HK, Batnasan D, Steinborn F, et al. Genetic affinities among Mongol ethnic groups and their relationship to Turks. *Tissue Antigens*. 2003;**61**:292-9.
108. Munkhbat B, Sato T, Hagihara M, et al. Molecular analysis of HLA polymorphism in Khoton-Mongolians. *Tissue Antigens*. 1997;**50**:124-34.
109. Hong W, Chen S, Shao H, Fu Y, Hu Z, Xu A. HLA class I polymorphism in Mongolian and Hui ethnic groups from Northern China. *Hum Immunol*. 2007;**68**:439-48.
110. Yao Y, Shi L, Tao Y, et al. Distinct HLA allele and haplotype distributions in four ethnic groups of China. *Tissue Antigens*. 2012;**80**:452-61.
111. Su X, Bi L, Hai R, et al. HLA-DPB1, -DRB1, and -DQB1 polymorphism defined in Ewenki ethnic minority of China Inner Mongolia Autonomous Region. *Int J Immunogenet*. 2007;**34**:435-40.

112. Grahovac B, Sukernik RI, O'HUigin C, et al. Polymorphism of the HLA class II loci in Siberian populations. *Hum Genet.* 1998;**102**:27-43.
113. Geng L, Imanishi T, Tokunaga K, et al. Determination of HLA class II alleles by genotyping in a Manchu population in the northern part of China and its relationship with Han and Japanese populations. *Tissue Antigens.* 1995;**46**:111-6.
114. Mizuki M, Ohno S, Ando H, et al. Major histocompatibility complex class II alleles in Kazak and Han populations in the Silk Route of northwestern China. *Tissue Antigens.* 1997;**50**:527-34.
115. Zhang XN, Liu YG, Pazilaiti, et al. [Polymorphism of HLA-DQA1,-DQB1 genes in Uygur and Kazak ethnic groups and comprehensive analysis of 25 related populations]. *Yi Chuan Xue Bao.* 1998;**25**:193-8.
116. Martinez-Laso J, Sartakova M, Allende L, et al. HLA molecular markers in Tuvinians: a population with both Oriental and Caucasoid characteristics. *Ann Hum Genet.* 2001;**65**:245-61.
117. Begovich AB, Moonsamy PV, Mack SJ, et al. Genetic variability and linkage disequilibrium within the HLA-DP region: analysis of 15 different populations. *Tissue Antigens.* 2001;**57**:424-39.
118. Mizuki N, Ohno S, Ando H, et al. Major histocompatibility complex class II alleles in an Uygur population in the Silk Route of Northwest China. *Tissue Antigens.* 1998;**51**:287-92.
119. Shen JJ, Tan YH, Guan XL, et al. [Study on HLA-DR-DQ haplotypes in Xinjiang Uygur]. *Zhong Hua Yi Xue Yi Chuan Xue Za Zhi.* 1997;**14**:234-8.
120. Shen CM, Zhu BF, Deng YJ, et al. Allele polymorphism and haplotype diversity of HLA-A, -B and -DRB1 loci in sequence-based typing for Chinese Uyghur ethnic group. *PLoS One.* 2010;**5**:e13458.
121. Moscoso J, Crawford MH, Vicario JL, et al. HLA genes of Aleutian Islanders living between Alaska (USA) and Kamchatka (Russia) suggest a possible southern Siberia origin. *Mol Immunol.* 2008;**45**:1018-26.
122. Krylov M, Erdesz S, Alexeeva L, Benevolenskaya L, Arnett FC, Reveille JD. HLA class II and HLA-B27 oligotyping in two Siberian native population groups. *Tissue Antigens.* 1995;**46**:382-6.
123. Bannai M, Tokunaga K, Imanishi T, et al. HLA class II alleles in Ainu living in Hidaka District, Hokkaido, northern Japan. *Am J Phys Anthropol.* 1996;**101**:1-9.
124. Bannai M, Ohashi J, Harihara S, et al. Analysis of HLA genes and haplotypes in Ainu (from Hokkaido, northern Japan) supports the premise that they descent from Upper Paleolithic populations of East Asia. *Tissue Antigens.* 2000;**55**:128-39.
125. Uinuk-ool TS, Takezaki N, Derbeneva OA, Volodko NV, Sukernik RI. Variation of HLA class II genes in the Nganasan and Ket, two aboriginal Siberian populations. *Eur J Immunogenet.* 2004;**31**:43-51.

126. Lou H, Li HC, Kuwayama M, et al. HLA class I and class II of the Nivkhi, an indigenous population carrying HTLV-I in Sakhalin, Far Eastern Russia. *Tissue Antigens*. 1998;**52**:444-51.
127. Yang S, Wang JY, Gao M, et al. Association of HLA-DQA1 and DQB1 genes with vitiligo in Chinese Hans. *Int J Dermatol*. 2005;**44**:1022-7.
128. Yang G, Deng YJ, Hu SN, et al. HLA-A, -B, and -DRB1 polymorphism defined by sequence-based typing of the Han population in Northern China. *Tissue Antigens*. 2006;**67**:146-52.
129. Li D, Liu HY, Xi B, Yu Y. [Study on the genic polymorphism of HLA-DRB1 in a population in the north of China]. *Zhong Hua Yi Xue Yi Chuan Xue Za Zhi*. 2003;**20**:325-7.
130. Sun X, Sun Y, Mai W, et al. [A comparative study of HLA-A locus in northern and southern Chinese by means of PCR/SSOP typing]. *Zhonghua Yi Xue Yi Chuan Xue Za Zhi*. 1999;**16**:70-3.
131. Liu Y, Cui C, Zhuomaciren., et al. Comparison study on the polymorphisms of HLA-DQA1, DQB1 gene in Northern Han and Tibetan. *Yi Xue Yan Jiu Za Zhi*. 2009;**38**:35-8.
132. Wang Z, Zhang B, Ma R, Du J, Kong D. [HLA-A, B and DR high-resolution gene polymorphism of Henan Stem Cell Registry]. *Journal of Clinical Rehabilitative Tissue Engineering Research*. 2011;**15**:5801-04.
133. Li Y, Shen G, Wu J, et al. [The HLA-DRB1 gene polymorphism at high resolution of Han population from Hubei Branch of CMDP]. *Chin J Blood Transfusion*. 2010;**23**:443-5.
134. Pan QQ, Fan S, Wang XY, et al. Distribution of human leucocyte antigen-A, -B and -DR alleles and haplotypes at high resolution in the population from Jiangsu province of China. *Int J Immunogenet*. 2011;**38**:475-81.
135. Pan QQ, Fan S, Wang XY, et al. The distribution of human leukocyte antigen-A, -B, and -DRB1 alleles and haplotypes based on high-resolution genotyping of 167 families from Jiangsu Province, China. *Hum Immunol*. 2011;**72**:872-6.
136. Wang X, Liu M, Liu S, Qi J, Zhou D, Wu J. [Polymorphism of high-resolution HLA-A, -B and -DRB1 alleles in Shaanxi Chinese Han nationality hemopoietic stem cell donors]. *Chin J Blood Transfusion*. 2011;**24**:584-89.
137. Liu X, Feng Z, Hu B, et al. [The distribution of HLA-A, B, DRB1 alleles and haplotypes of Han unrelated stem cell donors in Shandong Peninsula, China]. *Chin J Blood Transfusion*. 2010;**23**:592-5.
138. Zhu CF, Zhang Y, Song YH, et al. [Distribution of HLA-C alleles in Shandong Han population of China]. *Zhong Hua Wei Sheng Wu Xue He Mian Yi Xue Za Zhi*. 2017;**33**:330-3.
139. Han SX, Shang YB, Li JH, et al. [High resolution DNA typing for HLA-A, B, Cw genes by polymerase chain reaction-sequence specific oligonucleotide



- probes method in the Shenyang Han population]. *Zhonghua Yi Xue Yi Chuan Xue Za Zhi*. 2005;**22**:665-7.
140. Yu GL, Sun YP, Xu LM, et al. [A Study on HLA-DR, DQ and DP DNA typing in Shenyang Han populations]. *Zhong Guo Mian Yi Xue Za Zhi*. 1995;**11**:142-5.
141. Yuan YH, Xu LM, An SP, Dong Z, Wang XQ. [A study of HLA-Cw alleles in association with psoriasis in Tianjin Han Chinese populations]. *Zhong Hua Feng Shi Bing Xue Za Zhi*. 2003;**7**:559-62.
142. Xu SB, Tao YF, Huang XQ, et al. [Polymorphism of HLA-DRB1 in Han population in Yunnan and comparison with 9 Han populations]. *Yi Chuan*. 2004;**26**:787-92.
143. Zhang HB, Gao F, Kang LL, Li SB. [Determination of HLA-A, B, and DRB1 gene polymorphism in Monba ethnic group of Xizang Autonomous Region, China]. *Zhonghua Yi Xue Yi Chuan Xue Za Zhi*. 2005;**22**:344-6.
144. Li X, Zhang XN, Zheng QP, et al. [Study on the distribution of HLA-DQA1 and -DQB1 in a Tibetan popation using PCR-RFLP method]. *Acta Genetica Sinica*. 1998;**25**:398-402.
145. Chen S, Hong W, Shao H, et al. Allelic distribution of HLA class I genes in the Tibetan ethnic population of China. *Int J Immunogenet*. 2006;**33**:439-45.
146. Qiu XP, Tan Y, Zuo ZH, Wei Y, Wu XX. Distribution of HLA-A, -B allele and haplotype polymorphism in the Tujia nationality of Hubei province in China. *Zhonghua Yi Xue Yi Chuan Xue Za Zhi*. 2006;**23**:219-21.
147. Shi L, Shi L, Yao YF, et al. Genetic link among Hani, Bulang and other Southeast Asian populations: evidence from HLA -A, -B, -C, -DRB1 genes and haplotypes distribution. *Int J Immunogenet*. 2010;**37**:467-75.
148. Goldfeld AE, Delgado JC, Thim S, et al. Association of an HLA-DQ allele with clinical tuberculosis. *JAMA*. 1998;**279**:226-8.
149. Lin J-h, Liu Z-h, Lv F-j, et al. Molecular analyses of HLA-DRB1, -DPB1, and -DQB1 in Jing ethnic minority of Southwest China. *Human Immunology*. 2003;**64**:830-4.
150. Hoa BK, Hang NT, Kashiwase K, et al. HLA-A, -B, -C, -DRB1 and -DQB1 alleles and haplotypes in the Kinh population in Vietnam. *Tissue Antigens*. 2007.
151. Vu-Trieu A, Djoulah S, Tran-Thi C, et al. HLA-DR and -DQB1 DNA polymorphisms in a Vietnamese Kinh population from Hanoi. *Eur J Immunogenet*. 1997;**24**:345-56.
152. Shi L, Ogata S, Yu JK, et al. Distribution of HLA alleles and haplotypes in Jinuo and Wa populations in Southwest China. *Hum Immunol*. 2008;**69**:58-65.
153. Shi L, Tao YF, Shi L, et al. [Distribution of HLA-C genes and HLA C-B, A-C-B haplotypes in Jinuo, Maonan and Wa ethnic populations in southwest China]. *Zhonghua Yi Xue Yi Chuan Xue Za Zhi*. 2011;**28**:341-6.
154. Chen S, Ren X, Liu Y, Hu Q, Hong W, Xu A. Human leukocyte antigen class I polymorphism in Miao, Bouyei, and Shui ethnic minorities of Guizhou,

China. *Hum Immunol*. 2007;**68**:928-33.

155.Liu Y, Liu Z, Fu Y, Jia Z, Chen S, Xu A. Polymorphism of HLA class II genes in Miao and Yao nationalities of Southwest China. *Tissue Antigens*. 2006;**67**:157-9.

156.Yao Y, Shi L, Shi L, et al. Distribution of HLA-A, -B, -Cw, and -DRB1 alleles and haplotypes in an isolated Han population in Southwest China. *Tissue Antigens*. 2009;**73**:561-8.

157.Sun XF, Li Q, Sun YP, et al. [The polymorphism of HLA class II alleles in Guangdong Han Nationality]. *Zhong Hua Yi Xue Yi Chuan Xue Za Zhi*. 1997;**14**:270-3.

158.Zhu WG, Jin SZ, Zou HY, et al. [Polymorphism and linkage disequilibrium analysis of HLA-A, -C, -B, -DRB1 and-DQB1 genes at high-resolution level I in Chinese Han population from Guangdong province]. *Chin J Blood Transfusion*. 2009;**22**:987-94.

159.Trachtenberg E, Vinson M, Hayes E, et al. HLA class I (A, B, C) and class II (DRB1, DQA1, DQB1, DPB1) alleles and haplotypes in the Han from southern China. *Tissue Antigens*. 2007;**70**:455-63.

160.Zhang XW, Guo SS. [Analysis of HLA-DR, DQ and DP DNA polymorphism in Hunan Han people with PCR-SSO method]. *Hunan Yi Ke Da Xue Xue Bao*. 1994;**19**:7-10.

161.Chen S, Li W, Hu Q, Liu Z, Xu Y, Xu A. Polymorphism of HLA class I genes in Meizhou Han population of Guangdong, China. *Int J Immunogenet*. 2007;**34**:131-6.

162.Wang FQ, Semana G, Fauchet R, Genetet B. HLA-DR and -DQ genotyping by PCR-SSO in Shanghai Chinese. *Tissue Antigens*. 1993;**41**:223-6.

163.Sun A. [High-resolution analysis of HLA-DRB1 genes among Han population bone marrow registry donors in Yueyang]. *Shi Yong Yu Fang Yi Xue*. 2011;**18**:1002-5.

164.Sun A, Su YP, Dai M, Su XH, Hu B, Chen M. [Analysis of polymorphisms of HLA-C high resolution data in an Yueyang Han Chinese population]. *Xian Dai Yi Yao Wei Sheng*. 2016;**32**:2726-8.

165.He J, Zhang W, He Y, et al. [Analysis of high-resolution HLA-A, -B, -DRB1 allelic frequency and haplotypes in Zhejiang Han population]. *Chin J Microbiol Immunol*. 2010;**30**:800-3.

166.He Y, Zhang W, Chen N, et al. HLA-A, -B and -DRB1 allele and haplotype frequencies of 8333 Chinese Han from the Zhejiang province, China. *Int J Immunogenet*. 2016;**43**:86-95.

167.Hu W, Tang L, Wang J, et al. Polymorphism of HLA-DRB1, -DQB1 and -DPB1 genes in Bai ethnic group in southwestern China. *Tissue Antigens*. 2008;**72**:474-7.

168. Yang W, Wang MF, Huang YK, et al. HLA-DRB1 and DQB1 polymorphism of Bai and Yi people in Kunming. *International Journal of Immunology*. 2006.
169. Jia ZJ, Fu YG, Pan DJ, et al. [Determination of HLA-DRB1 gene polymorphism by PCR-SBT in Lahu ethnic group of Yunnan, China]. *Yi Chuan*. 2002;**24**:131-6.
170. Chen S, Hu Q, Xie Y, et al. Origin of Tibeto-Burman speakers: evidence from HLA allele distribution in Lisu and Nu inhabiting Yunnan of China. *Hum Immunol*. 2007;**68**:550-9.
171. Fu Y, Liu Z, Lin J, et al. HLA-DRB1, DQB1 and DPB1 polymorphism in the Naxi ethnic group of South-western China. *Tissue Antigens*. 2003;**61**:179-83.
172. Shi L, Xu SB, Ohashi J, et al. HLA-A, HLA-B, and HLA-DRB1 alleles and haplotypes in Naxi and Han populations in southwestern China (Yunnan province). *Tissue Antigens*. 2006;**67**:38-44.
173. Xu XP, Wang CY, Cao JF, et al. [A study on DNA typing of HLA Class II genes in Chinese Buyi people]. *zhong Hua Wei Sheng Wu Xue He Mian Yi Xue Za Zhi*. 1992;**12**:285-8.
174. Chandanayingyong D, Stephens HA, Klaythong R, et al. HLA-A, -B, -DRB1, -DQA1, and -DQB1 polymorphism in Thais. *Hum Immunol*. 1997;**53**:174-82.
175. Fan LA, Yang YQ, Dong JZ. [HLA class II oligonucleotide typing of a Dai minority population in Xishuangbanna of China]. *Zhong Guo Mian Yi Xue Za Zhi*. 1992;**5**.
176. Hong KX, Chu JY, Li DN, et al. [Genetic diversity of HLA-DRB1, DQA1, DQB1 in Chinese Li population in Hainan]. *Guo Ji Yi Chuan Xue Za Zhi*. 2006;**29**:324-7.
177. Ogata S, Shi L, Matsushita M, et al. Polymorphisms of human leucocyte antigen genes in Maonan people in China. *Tissue Antigens*. 2007;**69**:154-60.
178. Pimtanonthai N, Charoenwongse P, Mutirangura A, Hurley CK. Distribution of HLA-B alleles in nasopharyngeal carcinoma patients and normal controls in Thailand. *Tissue Antigens*. 2002;**59**:223-5.
179. Maneemaraj R, Chandanayingyong D, Stephens HAF, Longta K, Bejrachandra S. HLA Class II Allele Frequencies in Northern Thais (Kamphaeng Phet). *Journal of Medical Association of Thailand*. 1997;**80**.
180. Dharakul T, Vejbaesya S, Chaowagul W, Luangtrakool P, Stephens HA, Songsivilai S. HLA-DR and -DQ associations with melioidosis. *Hum Immunol*. 1998;**59**:580-6.
181. Pan SL, Liu CW, Long GF, et al. [Polymorphism of HLA-DQA1 and HLA-DQB1 loci of Zhuang nationality longevous population in Donglan County of Guangxi]. *Zhong Guo Lao Nian Xue Za Zhi*. 2005;**25**:233-5.
182. Long GF, Abudi. [HLA-DQA1 and DQB1 genotyping by PCR-SSP technique in Guangxi Zhuang Chinese]. *Zhonghua Wei Sheng Wu Xue He Mian Yi Xue Za Zhi*. 1999;**19**:504-5.

183. Shi L, Huang XQ, Shi L, et al. HLA polymorphism of the Zhuang population reflects the common HLA characteristics among Zhuang-Dong language-speaking populations. *J Zhejiang Univ Sci B*. 2011;**12**:428-35.
184. Gao X, Zimmet P, Serjeantson SW. HLA-DR,DQ sequence polymorphisms in Polynesians, Micronesians, and Javanese. *Hum Immunol*. 1992;**34**:153-61.
185. Velickovic ZM, Delahunt B, Carter JM. HLA-DRB1 and HLA-DQB1 polymorphisms in Pacific Islands populations. *Tissue Antigens*. 2002;**59**:397-406.
186. Dhaliwal JS, Wong L, Kamaluddin MA, Yin LY, Murad S. Susceptibility to aplastic anemia is associated with HLA-DRB1\*1501 in an aboriginal population in Sabah, Malaysia. *Hum Immunol*. 2011;**72**:889-92.
187. Mack SJ, Bugawan TL, Moonsamy PV, et al. Evolution of Pacific/Asian populations inferred from HLA class II allele frequency distributions. *Tissue Antigens*. 2000;**55**:383-400.
188. Yuliwulandari R, Kashiwase K, Nakajima H, et al. Polymorphisms of HLA genes in Western Javanese (Indonesia): close affinities to Southeast Asian populations. *Tissue Antigens*. 2009;**73**:46-53.
189. Yuliwulandari R, Sachrowardi Q, Nakajima H, et al. Association of HLA-A, -B, and -DRB1 with pulmonary tuberculosis in western Javanese Indonesia. *Hum Immunol*. 2010;**71**:697-701.
190. Jinam TA, Saitou N, Edo J, Mahmood A, Phipps ME. Molecular analysis of HLA Class I and Class II genes in four indigenous Malaysian populations. *Tissue Antigens*. 2010;**75**:151-8.
191. Dhaliwal JS, Shahnaz M, Azrena A, et al. HLA polymorphism in three indigenous populations of Sabah and Sarawak. *Tissue Antigens*. 2010;**75**:166-9.
192. Tracey MC, Carter JM. Class II HLA allele polymorphism: DRB1, DQB1 and DPB1 alleles and haplotypes in the New Zealand Maori population. *Tissue Antigens*. 2006;**68**:297-302.
193. Main P, Attenborough RD, Chelvanayagam G, Gao X. The Peopling of New Guinea: Evidence from Class I Human Leukocyte Antigen. *Human Biology*. 2001;**73**:365-83.
194. Ohashi J, Yoshida M, Ohtsuka R, Nakazawa M, Juji T, Tokunaga K. Analysis of HLA-DRB1 polymorphism in the Gidra of Papua New Guinea. *Hum Biol*. 2000;**72**:337-47.
195. Monsalve MV, Edin G, Devine DV. Analysis of HLA class I and class II in Na-Dene and Amerindian populations from British Columbia, Canada. *Hum Immunol*. 1998;**59**:48-55.
196. Gragert L, Madbouly A, Freeman J, Maiers M. Six-locus high resolution HLA haplotype frequencies derived from mixed-resolution DNA typing for the entire US donor registry. *Hum Immunol*. 2013;**74**:1313-20.
197. Williams R, Chen YF, Endres R, et al. Molecular variation at the HLA-A, B, C, DRB1, DQA1, and DQB1 loci in full heritage American Indians in Arizona:

private haplotypes and their evolution. *Tissue Antigens*. 2009;**74**:520-33.

198. Hollenbach JA, Thomson G, Cao K, et al. HLA diversity, differentiation, and haplotype evolution in Mesoamerican Natives. *Hum Immunol*. 2001;**62**:378-90.

199. Leffell MS, Fallin MD, Hildebrand WH, Cavett JW, Iglehart BA, Zachary AA. HLA alleles and haplotypes among the Lakota Sioux: report of the ASHI minority workshops, part III. *Hum Immunol*. 2004;**65**:78-89.

200. Garcia-Ortiz JE, Sandoval-Ramirez L, Rangel-Villalobos H, et al. High-resolution molecular characterization of the HLA class I and class II in the Tarahumara Amerindian population. *Tissue Antigens*. 2006;**68**:135-46.

201. Leffell MS, Fallin MD, Erlich HA, et al. HLA antigens, alleles and haplotypes among the Yup'ik Alaska natives: report of the ASHI Minority Workshops, Part II. *Hum Immunol*. 2002;**63**:614-25.

202. Tsuneto LT, Probst CM, Hutz MH, et al. HLA class II diversity in seven Amerindian populations. Clues about the origins of the Ache. *Tissue Antigens*. 2003;**62**:512-26.

203. Cerna M, Falco M, Friedman H, et al. Differences in HLA class II alleles of isolated South American Indian populations from Brazil and Argentina. *Hum Immunol*. 1993;**37**:213-20.

204. Fernandez-Vina MA, Lazaro AM, Marcos CY, et al. Dissimilar evolution of B-locus versus A-locus and class II loci of the HLA region in South American Indian tribes. *Tissue Antigens*. 1997;**50**:233-50.

205. Yunis JJ, Ossa H, Salazar M, et al. Major histocompatibility complex class II alleles and haplotypes and blood groups of four Amerindian tribes of northern Colombia. *Hum Immunol*. 1994;**41**:248-58.

206. Arnaiz-Villena A, Siles N, Moscoso J, et al. Origin of Aymaras from Bolivia and their relationship with other Amerindians according to HLA genes. *Tissue Antigens*. 2005;**65**:379-90.

207. Trachtenberg EA, Keyeux G, Bernal JE, Rhodas MC, Erlich HA. Results of Expedicion Humana. I. Analysis of HLA class II (DRB1-DQA1-DPB1) alleles and DR-DQ haplotypes in nine Amerindian populations from Colombia. *Tissue Antigens*. 1996;**48**:174-81.

208. De Angelis F, Garzoli A, Battistini A, Iorio A, De Stefano GF. Genetic response to an environmental pathogenic agent: HLA-DQ and onchocerciasis in northwestern Ecuador. *Tissue Antigens*. 2012;**79**:123-9.

209. Trachtenberg EA, Erlich HA, Rickards O, DeStefano GF, Klitz W. HLA class II linkage disequilibrium and haplotype evolution in the Cayapa Indians of Ecuador. *Am J Hum Genet*. 1995;**57**:415-24.

210. Parolin ML, Carnese FR. HLA-DRB1 alleles in four Amerindian populations from Argentina and Paraguay. *Genet Mol Biol*. 2009;**32**:212-9.

211. Arnaiz-Villena A, Gonzalez-Alcos V, Serrano-Vela JI, et al. HLA genes in Uros from Titikaka Lake, Peru: origin and relationship with other Amerindians and worldwide populations. *Int J Immunogenet.* 2009;**36**:159-67.
212. Lazaro AM, Moraes ME, Marcos CY, Moraes JR, Fernandez-Vina MA, Stastny P. Evolution of HLA-class I compared to HLA-class II polymorphism in Terena, a South-American Indian tribe. *Hum Immunol.* 1999;**60**:1138-49.
213. Layrisse Z, Guedez Y, Dominguez E, et al. Extended HLA haplotypes in a Carib Amerindian population: the Yucpa of the Perija Range. *Hum Immunol.* 2001;**62**:992-1000.
